# Supplementary material for: Antibacterial T6SS effectors with a VRR-Nuc domain are structure-specific nucleases
Source: eLife journal article supplement (doi:10.7554/elife.82437), 2022-10-13
Supplement: fig1-data1 [file Bacterial competition Figure 1C.xlsx]

## Sheet: Experiment 1
Bacterial competition experiment 1
INPUT
WT			ΔtssB			ΔtssB tssB
10^-2	CFU/mL		10^-2	CFU/mL		10^-2	CFU/mL
40	4000		38	3800		39	3900
OUTPUT
WT				ΔtssB				ΔtssB tssB
10^-5	5x10^-6	CFU/mL		10^-5	5x10^-6	CFU/mL		10^-5	5x10^-6	CFU/mL
92	49	9200000		236	63	23600000		143	44	14300000
		9800000				12600000				8800000
	mean	9500000			mean	18100000			mean	11550000
OUT/IN	2375			OUT/IN	4763.16			OUT/IN	2961.54
normalized	1			normalized	2.00554			normalized	1.24696
	Prey recovery rate
WT	1
ΔtssB	2.00554
ΔtssB tssB	1.24696

## Sheet: Experiment 2
Bacterial competition experiment 2
INPUT
WT			ΔtssB			ΔtssB tssB
10^-2	CFU/mL		10^-2	CFU/mL		10^-2	CFU/mL
28	2800		30	3000		38	3800
50	5000		44	4400		39	3900
mean	3900		mean	3700		mean	3850
OUTPUT
WT				ΔtssB				ΔtssB tssB
10^-5	5x10^-6	CFU/mL		10^-5	5x10^-6	CFU/mL		10^-5	5x10^-6	CFU/mL
118	39	7800000		126	90	15300000			126	25200000
51	23	4850000		77	32	7050000		30	15	3000000
	mean	6325000			mean	11175000			mean	3000000
OUT/IN	1621.79			OUT/IN	3020.27			OUT/IN	779.221
normalized	1			normalized	1.8623			normalized	0.480468
	Prey recovery rate
WT	1
ΔtssB	1.8623
ΔtssB tssB	0.480468

## Sheet: Experiment 3
Bacterial competition experiment 3
INPUT
WT			ΔtssB			ΔtssB tssB
10^-2	CFU/mL		10^-2	CFU/mL		10^-2	CFU/mL
43	4300		43	4300		46	4600
OUTPUT
WT				ΔtssB				ΔtssB tssB
10^-5	5x10^-6	CFU/mL		10^-5	5x10^-6	CFU/mL		10^-5	5x10^-6	CFU/mL
476	230	47600000		821	554	82100000		205	111	20500000
		46000000				110800000				22200000
	mean	46800000			mean	96450000			mean	21350000
OUT/IN	10883.7			OUT/IN	22430.2			OUT/IN	4641.3
normalized	1			normalized	2.0609			normalized	0.426445
	Prey recovery rate
WT	1
ΔtssB	2.0609
ΔtssB tssB	0.426445

## Sheet: Experiment 4
Bacterial competition experiment 4
INPUT
WT			ΔtssB			ΔtssB tssB
10^-2	CFU/mL		10^-2	CFU/mL		10^-2	CFU/mL
48	4800		47	4700		52	5200
OUTPUT 20H
WT			ΔtssB			ΔtssB tssB
10^-6	CFU/mL		10^-6	CFU/mL		10^-6	CFU/mL
40	40000000		90	90000000		60	60000000
OUT/IN	8333.33		OUT/IN	19148.9		OUT/IN	11538.5
normalized	1		normalized	2.29787		normalized	1.38462
	Prey recovery rate
WT	1
ΔtssB	2.29787
ΔtssB tssB	1.38462

## Sheet: Experiment 5
Bacterial competition experiment 5
INPUT
WT			ΔtssB			ΔtssB tssB
10^-2	CFU/mL		10^-2	CFU/mL		10^-2	CFU/mL
90	9000		81	8100		83	8300
OUTPUT 20H
WT			ΔtssB			ΔtssB tssB
10^-6	CFU/mL		10^-6	CFU/mL		10^-6	CFU/mL
38	38000000		87	87000000		32	32000000
OUT/IN	4222.22		OUT/IN	10740.7		OUT/IN	3855.42
normalized	1		normalized	2.54386		normalized	0.913126
	Prey recovery rate
WT	1
ΔtssB	2.54386
ΔtssB tssB	0.913126

## Sheet: Experiment 6
Bacterial competition experiment 6
INPUT
WT			ΔtssB			ΔtssB tssB
10^-2	CFU/mL		10^-2	CFU/mL		10^-2	CFU/mL
68	6800		70	7000		75	7500
OUTPUT 20H
WT			ΔtssB			ΔtssB tssB
10^-5	CFU/mL		10^-5	CFU/mL		10^-5	CFU/mL
96	9600000		284	28400000		81	8100000
OUT/IN	1411.76		OUT/IN	4057.14		OUT/IN	1080
normalized	1		normalized	2.87381		normalized	0.765
	Prey recovery rate
WT	1
ΔtssB	2.87381
ΔtssB tssB	0.765
