# Supplementary material for: Antibacterial T6SS effectors with a VRR-Nuc domain are structure-specific nucleases
Source: eLife journal article supplement (doi:10.7554/elife.82437), 2022-10-13
Supplement: fig2-data3 [file TseV2 bacterial competiton.xlsx]

## Sheet: Experiment 1
	INPUT
	WT vs ΔtseV2/tsiV2.1/2.2			WT vs ΔtseV2/tsiV2.1/2.2 complemented tsiV2.1			ΔtssB vs ΔtseV2/tsiV2.1/2.2
	10^-2	CFU/mL		10^-2	CFU/mL		10^-2	CFU/mL
	129	12900		114	11400		115	11500
	OUTPUT 20 h
	WT vs ΔtseV2/tsiV2.1/2.2			WT vs ΔtseV2/tsiV2.1/2.2 complemented tsiV2.1			ΔtssB vs ΔtseV2/tsiV2.1/2.2
	10^-6	CFU/mL		10^-6	CFU/mL		10^-6	CFU/mL
	164	164000000		334	334000000		339	339000000
	OUT/IN	12713.2		OUT/IN	29298.2		OUT/IN	29478.3
	normalized	1		normalized	2.30456		normalized	2.31872
				Prey recovery rate 20h
WT vs ΔtseV2/tsiV2.1/2.2				1
WT vs ΔtseV2/tsiV2.1/2.2 complemented tsiV2.1				2.30456
ΔtssB vs ΔtseV2/tsiV2.1/2.2				2.31872

## Sheet: Experiment 2
	INPUT
	WT vs ΔtseV2/tsiV2.1/2.2			WT vs ΔtseV2/tsiV2.1/2.2 complemented tsiV2.1			ΔtssB vs ΔtseV2/tsiV2.1/2.2
	10^-3	CFU/mL		10^-3	CFU/mL		10^-3	CFU/mL
	17	17000		16	16000		14	14000
	OUTPUT 20 h
	WT vs ΔtseV2/tsiV2.1/2.2			WT vs ΔtseV2/tsiV2.1/2.2 complemented tsiV2.1			ΔtssB vs ΔtseV2/tsiV2.1/2.2
	10^-6	CFU/mL		10^-6	CFU/mL		10^-6	CFU/mL
	87	87000000		173	173000000		116	116000000
	OUT/IN	5117.65		OUT/IN	10812.5		OUT/IN	8285.71
	normalized	1		normalized	2.11279		normalized	1.61905
				Prey recovery rate 20h
WT vs ΔtseV2/tsiV2.1/2.2				1
WT vs ΔtseV2/tsiV2.1/2.2 complemented tsiV2.1				2.11279
ΔtssB vs ΔtseV2/tsiV2.1/2.2				1.61905

## Sheet: Experiment 3
	INPUT
	WT vs ΔtseV2/tsiV2.1/2.2			WT vs ΔtseV2/tsiV2.1/2.2 complemented tsiV2.1			ΔtssB vs ΔtseV2/tsiV2.1/2.2
	10^-3	CFU/mL		10^-3	CFU/mL		10^-3	CFU/mL
	52	52000		45	45000		51	51000
	OUTPUT 20 h
	WT vs ΔtseV2/tsiV2.1/2.2			WT vs ΔtseV2/tsiV2.1/2.2 complemented tsiV2.1			ΔtssB vs ΔtseV2/tsiV2.1/2.2
	10^-6	CFU/mL		10^-6	CFU/mL		10^-6	CFU/mL
	125	125000000		229	229000000		266	266000000
	OUT/IN	2403.85		OUT/IN	5088.89		OUT/IN	5215.69
	normalized	1		normalized	2.11698		normalized	2.16973
				Prey recovery rate 20h
WT vs ΔtseV2/tsiV2.1/2.2				1
WT vs ΔtseV2/tsiV2.1/2.2 complemented tsiV2.1				2.11698
ΔtssB vs ΔtseV2/tsiV2.1/2.2				2.16973

## Sheet: Experiment 4
	INPUT
	WT vs ΔtseV2/tsiV2.1/2.2			WT vs ΔtseV2/tsiV2.1/2.2 complemented tsiV2.1			ΔtssB vs ΔtseV2/tsiV2.1/2.2
	10^-3	CFU/mL		10^-3	CFU/mL		10^-3	CFU/mL
	146	146000		153	153000		150	150000
	OUTPUT 20 h
	WT vs ΔtseV2/tsiV2.1/2.2			WT vs ΔtseV2/tsiV2.1/2.2 complemented tsiV2.1			ΔtssB vs ΔtseV2/tsiV2.1/2.2
	10^-7	CFU/mL		10^-7	CFU/mL		10^-7	CFU/mL
	17	170000000		42	420000000		49	490000000
	OUT/IN	1164.38		OUT/IN	2745.1		OUT/IN	3266.67
	normalized	1		normalized	2.35755		normalized	2.80549
				Prey recovery rate 20h
WT vs ΔtseV2/tsiV2.1/2.2				1
WT vs ΔtseV2/tsiV2.1/2.2 complemented tsiV2.1				2.35755
ΔtssB vs ΔtseV2/tsiV2.1/2.2				2.80549

## Sheet: Experiment 5
	INPUT
	WT vs ΔtseV2/tsiV2.1/2.2			WT vs ΔtseV2/tsiV2.1/2.2 complemented tsiV2.1			ΔtssB vs ΔtseV2/tsiV2.1/2.2
	10^-3	CFU/mL		10^-3	CFU/mL		10^-3	CFU/mL
	187	187000		175	175000		177	177000
	OUTPUT 20 h
	WT vs ΔtseV2/tsiV2.1/2.2			WT vs ΔtseV2/tsiV2.1/2.2 complemented tsiV2.1			ΔtssB vs ΔtseV2/tsiV2.1/2.2
	10^-6	CFU/mL		10^-6	CFU/mL		10^-6	CFU/mL
	176	176000000		341	341000000		323	323000000
	OUT/IN	941.176		OUT/IN	1948.57		OUT/IN	1824.86
	normalized	1		normalized	2.07036		normalized	1.93891
				Prey Recovery rate 20h
	WTvs ΔTseV2/TsiV2.1/2.2			1
WTvs ΔTseV2/TsiV2.1/2.2 complemented TsiV2.1				2.07036
	ΔTssB vs ΔTseV2/TsiV2.1/2.2			1.93891

## Sheet: Experiment 6
	INPUT
	WT vs ΔtseV2/tsiV2.1/2.2			WT vs ΔtseV2/tsiV2.1/2.2 complemented tsiV2.1			ΔtssB vs ΔtseV2/tsiV2.1/2.2
	10^-3	CFU/mL		10^-3	CFU/mL		10^-3	CFU/mL
	102	102000		118	118000		115	115000
	OUTPUT 20 h
	WT vs ΔtseV2/tsiV2.1/2.2			WT vs ΔtseV2/tsiV2.1/2.2 complemented tsiV2.1			ΔtssB vs ΔtseV2/tsiV2.1/2.2
	10^-6	CFU/mL		10^-6	CFU/mL		10^-6	CFU/mL
	112	112000000		199	199000000		251	251000000
	OUT/IN	1098.04		OUT/IN	1686.44		OUT/IN	2182.61
	normalized	1		normalized	1.53587		normalized	1.98773
				Prey recovery rate 20h
WTvs ΔTseV2/TsiV2.1/2.2				1
WTvs ΔTseV2/TsiV2.1/2.2 complemented TsiV2.1				1.53587
ΔTssB vs ΔTseV2/TsiV2.1/2.2				1.98773
