# Supplementary material for: Antibacterial T6SS effectors with a VRR-Nuc domain are structure-specific nucleases
Source: eLife journal article supplement (doi:10.7554/elife.82437), 2022-10-13
Supplement: fig2-data3 [file TseV2 VgrGs competitions.xlsx]

## Sheet: Experiment 1
	INPUT
	WT vs ΔtseV2/tsiV2.1/2.2			ΔtssB vs ΔtseV2/tsiV2.1/2.2			ΔvgrG1 vs ΔtseV2/tsiV2.1/2.2			ΔvgrG2 vs ΔtseV2/tsiV2.1/2.2			ΔvgrG3 vs ΔtseV2/tsiV2.1/2.2
	10^-3	CFU/ml		10^-3	CFU/ml		10^-3	CFU/ml		10^-3	CFU/ml		10^-3	CFU/ml
	64	64000		62	62000		53	53000		61	61000		59	59000
	OUTPUT 20 h
	WT vs ΔtseV2/tsiV2.1/2.2			ΔtssB vs ΔtseV2/tsiV2.1/2.2			ΔvgrG2 vs ΔtseV2/tsiV2.1/2.2			ΔvgrG2 vs ΔtseV2/tsiV2.1/2.2			ΔvgrG3 vs ΔtseV2/tsiV2.1/2.2
	10^-6	CFU/ml		10^-6	CFU/ml		10^-6	CFU/ml		10^-6	CFU/ml		10^-6	CFU/ml
	204	204000000		280	280000000		152	152000000		273	273000000		62	62000000
	OUT/IN	3187.5		OUT/IN	4516.13		OUT/IN	2867.92		OUT/IN	4475.41		OUT/IN	1050.85
	normalized	1		normalized	1.41682		normalized	0.899741		normalized	1.40405		normalized	0.329678
					Prey recovery rate
	WT vs ΔtseV2/tsiV2.1/2.2				1
	ΔtssB vs ΔtseV2/tsiV2.1/2.2				1.41682
	ΔvgrG1 vs ΔtseV2/tsiV2.1/2.2				0.899741
	ΔvgrG2 vs ΔtseV2/tsiV2.1/2.2				1.40405
	ΔvgrG3 vs ΔtseV2/tsiV2.1/2.2				0.329678

## Sheet: Experiment 2
	INPUT
	WT vs ΔtseV2/tsiV2.1/2.2			ΔtssB vs ΔtseV2/tsiV2.1/2.2			ΔvgrG1 vs ΔtseV2/tsiV2.1/2.2			ΔvgrG2 vs ΔtseV2/tsiV2.1/2.2			ΔvgrG3 vs ΔtseV2/tsiV2.1/2.2
	10^-3	CFU/ml		10^-3	CFU/ml		10^-3	CFU/ml		10^-3	CFU/ml		10^-3	CFU/ml
	69	69000		64	64000		63	63000		59	59000		67	67000
	OUTPUT 20 h
	WT vs ΔtseV2/tsiV2.1/2.2			ΔtssB vs ΔtseV2/tsiV2.1/2.2			ΔvgrG1 vs ΔtseV2/tsiV2.1/2.2			ΔvgrG2 vs ΔtseV2/tsiV2.1/2.2			ΔvgrG3 vs ΔtseV2/tsiV2.1/2.2
	10^-6	CFU/ml		10^-6	CFU/ml		10^-6	CFU/ml		10^-6	CFU/ml		10^-6	CFU/ml
	202	202000000		291	291000000		243	243000000		342	342000000		260	260000000
	OUT/IN	2927.54		OUT/IN	4546.88		OUT/IN	3857.14		OUT/IN	5796.61		OUT/IN	3880.6
	normalized	1		normalized	1.55314		normalized	1.31754		normalized	1.98003		normalized	1.32555
					Prey recovery rate
	WT vs ΔtseV2/tsiV2.1/2.2				1
	ΔtssB vs ΔtseV2/tsiV2.1/2.2				1.55314
	ΔvgrG1 vs ΔtseV2/tsiV2.1/2.2				1.31754
	ΔvgrG2 vs ΔtseV2/tsiV2.1/2.2				1.98003
	ΔvgrG3 vs ΔtseV2/tsiV2.1/2.2				1.32555

## Sheet: Experiment 3
	INPUT
	WT vs ΔtseV2/tsiV2.1/2.2			ΔtssB vs ΔtseV2/tsiV2.1/2.2			ΔvgrG1 vs ΔtseV2/tsiV2.1/2.2			ΔvgrG2 vs ΔtseV2/tsiV2.1/2.2			ΔvgrG3 vs ΔtseV2/tsiV2.1/2.2
	10^-2	CFU/ml		10^-2	CFU/ml		10^-2	CFU/ml		10^-2	CFU/ml		10^-2	CFU/ml
	138	13800		164	16400		165	16500		103	10300		140	14000
	OUTPUT 20 h
	WT vs ΔtseV2/tsiV2.1/2.2			ΔtssB vs ΔtseV2/tsiV2.1/2.2			ΔvgrG1 vs ΔtseV2/tsiV2.1/2.2			ΔvgrG2 vs ΔtseV2/tsiV2.1/2.2			ΔvgrG3 vs ΔtseV2/tsiV2.1/2.2
	10^-6	CFU/ml		10^-6	CFU/ml		10^-6	CFU/ml		10^-6	CFU/ml		10^-6	CFU/ml
	100	100000000		175	175000000		157	157000000		143	143000000		98	98000000
	OUT/IN	7246.38		OUT/IN	10670.7		OUT/IN	9515.15		OUT/IN	13883.5		OUT/IN	7000
	normalized	1		normalized	1.47256		normalized	1.31309		normalized	1.91592		normalized	0.966
					Prey recovery rate
	WT vs ΔtseV2/tsiV2.1/2.2				1
	ΔtssB vs ΔtseV2/tsiV2.1/2.2				1.47256
	ΔvgrG1 vs ΔtseV2/tsiV2.1/2.2				1.31309
	ΔvgrG2 vs ΔtseV2/tsiV2.1/2.2				1.91592
	ΔvgrG3 vs ΔtseV2/tsiV2.1/2.2				0.966

## Sheet: Experiment 4
	INPUT
	WT vs ΔtseV2/tsiV2.1/2.2			ΔtssB vs ΔtseV2/tsiV2.1/2.2			ΔvgrG1 vs ΔtseV2/tsiV2.1/2.2			ΔvgrG2 vs ΔtseV2/tsiV2.1/2.2			ΔvgrG3 vs ΔtseV2/tsiV2.1/2.2
	10^-2	CFU/ml		10^-2	CFU/ml		10^-2	CFU/ml		10^-2	CFU/ml		10^-2	CFU/ml
	399	39900		369	36900		380	38000		395	39500		349	34900
	OUTPUT 20 h
	WT vs ΔtseV2/tsiV2.1/2.2			ΔtssB vs ΔtseV2/tsiV2.1/2.2			ΔvgrG1 vs ΔtseV2/tsiV2.1/2.2			ΔvgrG2 vs ΔtseV2/tsiV2.1/2.2			ΔvgrG3 vs ΔtseV2/tsiV2.1/2.2
	10^-6	CFU/ml		10^-6	CFU/ml		10^-6	CFU/ml		10^-6	CFU/ml		10^-6	CFU/ml
	81	81000000		121	121000000		102	102000000		130	130000000		89	89000000
	OUT/IN	2030.08		OUT/IN	3279.13		OUT/IN	2684.21		OUT/IN	3291.14		OUT/IN	2550.14
	normalized	1		normalized	1.61528		normalized	1.32222		normalized	1.62119		normalized	1.25618
					Prey recovery rate
	WT vs ΔtseV2/tsiV2.1/2.2				1
	ΔtssB vs ΔtseV2/tsiV2.1/2.2				1.61528
	ΔvgrG1 vs ΔtseV2/tsiV2.1/2.2				1.32222
	ΔvgrG2 vs ΔtseV2/tsiV2.1/2.2				1.62119
	ΔvgrG3 vs ΔtseV2/tsiV2.1/2.2				1.25618

## Sheet: Experiment 5
	INPUT
	WT vs ΔtseV2/tsiV2.1/2.2			ΔtssB vs ΔtseV2/tsiV2.1/2.2			ΔvgrG1 vs ΔtseV2/tsiV2.1/2.2			ΔvgrG2 vs ΔtseV2/tsiV2.1/2.2			ΔvgrG3 vs ΔtseV2/tsiV2.1/2.2
	10^-3	CFU/ml		10^-3	CFU/ml		10^-3	CFU/ml		10^-3	CFU/ml		10^-3	CFU/ml
	75	75000		79	79000		74	74000		80	80000		75	75000
	OUTPUT 20 h
	WT vs ΔtseV2/tsiV2.1/2.2			ΔtssB vs ΔtseV2/tsiV2.1/2.2			ΔvgrG1 vs ΔtseV2/tsiV2.1/2.2			ΔvgrG2 vs ΔtseV2/tsiV2.1/2.2			ΔvgrG3 vs ΔtseV2/tsiV2.1/2.2
	10^-6	CFU/ml		10^-6	CFU/ml		10^-6	CFU/ml		10^-6	CFU/ml		10^-6	CFU/ml
	467	467000000		634	634000000		483	483000000		773	773000000		421	421000000
	OUT/IN	6226.67		OUT/IN	8025.32		OUT/IN	6527.03		OUT/IN	9662.5		OUT/IN	5613.33
	normalized	1		normalized	1.28886		normalized	1.04824		normalized	1.55179		normalized	0.901499
					Prey recovery rate
	WT vs ΔtseV2/tsiV2.1/2.2				1
	ΔtssB vs ΔtseV2/tsiV2.1/2.2				1.28886
	ΔvgrG1 vs ΔtseV2/tsiV2.1/2.2				1.04824
	ΔvgrG2 vs ΔtseV2/tsiV2.1/2.2				1.55179
	ΔvgrG3 vs ΔtseV2/tsiV2.1/2.2				0.901499

## Sheet: Experiment 6
	INPUT
	WT vs ΔtseV2/tsiV2.1/2.2			ΔtssB vs ΔtseV2/tsiV2.1/2.2			ΔvgrG1 vs ΔtseV2/tsiV2.1/2.2			ΔvgrG2 vs ΔtseV2/tsiV2.1/2.2			ΔvgrG3 vs ΔtseV2/tsiV2.1/2.2
	10^-3	CFU/ml		10^-3	CFU/ml		10^-3	CFU/ml		10^-3	CFU/ml		10^-3	CFU/ml
	299	299000		301	301000		312	312000		336	336000		335	335000
	OUTPUT 20 h
	WT vs ΔtseV2/tsiV2.1/2.2			ΔtssB vs ΔtseV2/tsiV2.1/2.2			ΔvgrG1 vs ΔtseV2/tsiV2.1/2.2			ΔvgrG2 vs ΔtseV2/tsiV2.1/2.2			ΔvgrG3 vs ΔtseV2/tsiV2.1/2.2
	10^-6	CFU/ml		10^-6	CFU/ml		10^-6	CFU/ml		10^-6	CFU/ml		10^-6	CFU/ml
	71	71000000		114	114000000		85	85000000		120	120000000		70	70000000
	OUT/IN	237.458		OUT/IN	378.738		OUT/IN	272.436		OUT/IN	357.143		OUT/IN	208.955
	normalized	1		normalized	1.59497		normalized	1.1473		normalized	1.50402		normalized	0.879966
					Prey recovery rate
	WT vs ΔtseV2/tsiV2.1/2.2				1
	ΔtssB vs ΔtseV2/tsiV2.1/2.2				1.59497
	ΔvgrG1 vs ΔtseV2/tsiV2.1/2.2				1.1473
	ΔvgrG2 vs ΔtseV2/tsiV2.1/2.2				1.50402
	ΔvgrG3 vs ΔtseV2/tsiV2.1/2.2				0.879966
