# Supplementary material for: Antibacterial T6SS effectors with a VRR-Nuc domain are structure-specific nucleases
Source: eLife journal article supplement (doi:10.7554/elife.82437), 2022-10-13
Supplement: fig2-data3 [file TseV3 bacterial competitions.xlsx]

## Sheet: Experiment 1
	INPUT
	WT vs ΔtseV3/tsiV3			WT vs ΔtseV3/tsiV3 complemented tsiV3			ΔtssB vs ΔtseV3/tsiV3
	10^-2	CFU/ml		10^-2	CFU/ml		10^-2	CFU/ml
	299	29900		191	19100		257	25700
	OUTPUT 6 h
	WT vs ΔtseV3/tsiV3				WT vs ΔtseV3/tsiV3 complemented tsiV3				ΔtssB vs ΔtseV3/tsiV3
	10^-5	10^-6	CFU/ml		10^-5	10^-6	CFU/ml		10^-5	10^-6	CFU/ml
	196	20	19800000		355	32	33750000		243	34	29150000
	OUT/IN		662.207		OUT/IN		1767.02		OUT/IN		1134.24
	normalized		1		normalized		2.66837		normalized		1.71282
					Prey recovery rate
	WT vs ΔtseV3/tsiV3				1
	WT vs ΔtseV3/tsiV3 complemented tsiV3				2.66837
	ΔtssB vs ΔtseV3/tsiV3				1.71282

## Sheet: Experiment 2
	INPUT
	WT vs ΔtseV3/tsiV3			WT vs ΔtseV3/tsiV3 complemented tsiV3			ΔtssB vs ΔtseV3/tsiV3
	10^-2	CFU/ml		10^-2	CFU/ml		10^-2	CFU/ml
	263	26300		195	19500		275	27500
	OUTPUT 6 h
	WT vs ΔtseV3/tsiV3			WT vs ΔtseV3/tsiV3 complemented tsiV3			ΔtssB vs ΔtseV3/tsiV3
	10^-6	CFU/ml		10^-6	CFU/ml		10^-6	CFU/ml
	205	205000000		346	346000000		308	308000000
	OUT/IN	7794.68		OUT/IN	17743.6		OUT/IN	11200
	normalized	1		normalized	2.27637		normalized	1.43688
					Prey recovery rate
	WT vs ΔtseV3/tsiV3				1
	WT vs ΔtseV3/tsiV3 complemented tsiV3				2.27637
	ΔtssB vs ΔtseV3/tsiV3				1.43688

## Sheet: Experiment 3
	INPUT
	WT vs ΔtseV3/tsiV3				WT vs ΔtseV3/tsiV3 complemented tsiV3				ΔtssB vs ΔtseV3/tsiV3
	10^-2	10^-3	CFU/ml		10^-2	10^-3	CFU/ml		10^-2	10^-3	CFU/ml
	421	38	40050		341	40	37050		547	22	38350
	OUTPUT 6 h
	WT vs ΔtseV3/tsiV3			WT vs ΔtseV3/tsiV3 complemented tsiV3			ΔtssB vs ΔtseV3/tsiV3
	10^-5	CFU/ml		10^-5	CFU/ml		10^-5	CFU/ml
	222	22200000		547	54700000		427	42700000
	OUT/IN	554.307		OUT/IN	1476.38		OUT/IN	1113.43
	normalized	1		normalized	2.66348		normalized	2.00869
					Prey recovery rate
	WT vs ΔtseV3/tsiV3				1
	WT vs ΔtseV3/tsiV3 complemented tsiV3				2.00869
	ΔtssB vs ΔtseV3/tsiV3				2.66348

## Sheet: Experiment 4
	INPUT
	WT vs ΔtseV3/tsiV3				WT vs ΔtseV3/tsiV3 complemented tsiV3				ΔtssB vs ΔtseV3/tsiV3
	10^-2	10^-3	CFU/ml		10^-2	10^-3	CFU/ml		10^-2	10^-3	CFU/ml
	244	51	37700		306	28	29300		307	32	31350
	OUTPUT 6 h
	WT vs ΔtseV3/tsiV3			WT vs ΔtseV3/tsiV3 complemented tsiV3			ΔtssB vs ΔtseV3/tsiV3
	10^-5	CFU/ml		10^-5	CFU/ml		10^-5	CFU/ml
	208	208000000		288	288000000		303	303000000
	OUT/IN	5517.24		OUT/IN	9829.35		OUT/IN	9665.07
	normalized	1		normalized	1.78157		normalized	1.75179
					Prey recovery rate
	WT vs ΔtseV3/tsiV3				1
	WT vs ΔtseV3/tsiV3 complemented tsiV3				1.78157
	ΔtssB vs ΔtseV3/tsiV3				1.75179

## Sheet: Experiment 5
	INPUT
	WT vs ΔTseV3/TsiV3			WT vs ΔtseV3/tsiV3 complemented tsiV3			ΔtssB vs ΔtseV3/tsiV3
	10^-2	CFU/ml		10^-2	CFU/ml		10^-2	CFU/ml
	365	36500		366	36600		379	37900
	OUTPUT 6 h
	WT vs ΔtseV3/tsiV3			WT vs ΔtseV3/tsiV3 complemented tsiV3			ΔtssB vs ΔtseV3/tsiV3
	10^-5	CFU/ml		10^-5	CFU/ml		10^-5	CFU/ml
	101	101000000		183	183000000		179	179000000
	OUT/IN	2767.12		OUT/IN	5000		OUT/IN	4722.96
	normalized	1		normalized	1.80693		normalized	1.70681
					Prey recovery rate
	WT vs ΔtseV3/tsiV3				1
	WT vs ΔtseV3/tsiV3 complemented tsiV3				1.80693
	ΔtssB vs ΔtseV3/tsiV3				1.70681

## Sheet: Experiment 6
	INPUT
	WT vs ΔtseV3/tsiV3				WT vs ΔtseV3/tsiV3 complemented tsiV3				ΔtssB vs ΔtseV3/tsiV3
	10^-2	10^-3	CFU/ml		10^-2	10^-3	CFU/ml		10^-2	10^-3	CFU/ml
	242	69	46600		282	66	47100		263	52	39150
	OUTPUT 6 h
	WT vs ΔtseV3/tsiV3			WT vs ΔtseV3/tsiV3 complemented tsiV3			ΔtssB vs ΔtseV3/tsiV3
	10^-5	CFU/ml		10^-5	CFU/ml		10^-5	CFU/ml
	107	107000000		234	234000000		219	219000000
	OUT/IN	2296.14		OUT/IN	4968.15		OUT/IN	5593.87
	normalized	1		normalized	2.1637		normalized	2.43621
					Prey recovery rate
	WT vs ΔtseV3/tsiV3				1
	WT vs ΔtseV3/tsiV3 complemented tsiV3				2.1637
	ΔtssB vs ΔtseV3/tsiV3				2.43621
