# Supplementary material for: Antibacterial T6SS effectors with a VRR-Nuc domain are structure-specific nucleases
Source: eLife journal article supplement (doi:10.7554/elife.82437), 2022-10-13
Supplement: fig2-data3 [file TseV3 VgrGs competitons.xlsx]

## Sheet: Experiment 1
	INPUT
	WT vs ΔtseV3/tsiV3			ΔtssB vs ΔtseV3/tsiV3			ΔvgrG1 vs ΔtseV3/tsiV3			ΔvgrG2 vs ΔtseV3/tsiV3			ΔvgrG3 vs ΔtseV3/tsiV3
	10^-2	CFU/ml		10^-2	CFU/ml		10^-2	CFU/ml		10^-2	CFU/ml		10^-2	CFU/ml
	269	26900		273	27300		288	28800		271	27100		221	22100
	OUTPUT 20 h
	WT vs ΔtseV3/tsiV3			ΔtssB vs ΔtseV3/tsiV3			ΔvgrG1 vs ΔtseV3/tsiV3			ΔvgrG2 vs ΔtseV3/tsiV3			ΔvgrG3 vs ΔtseV3/tsiV3
	10^-6	CFU/ml		10^-6	CFU/ml		10^-6	CFU/ml		10^-6	CFU/ml		10^-6	CFU/ml
	116	116000000		135	135000000		125	125000000		125	125000000		150	150000000
	OUT/IN	4312.27		OUT/IN	4945.05		OUT/IN	4340.28		OUT/IN	4612.55		OUT/IN	6787.33
	normalized	1		normalized	1.14674		normalized	1.0065		normalized	1.06963		normalized	1.57396
				Prey recovery rate
WT vs ΔtseV3/tsiV3				1
ΔtssB vs ΔtseV3/tsiV3				1.14674
ΔvgrG1 vs ΔtseV3/tsiV3				1.0065
ΔvgrG2 vs ΔtseV3/tsiV3				1.06963
ΔvgrG3 vs ΔtseV3/tsiV3				1.57396

## Sheet: Experiment 2
	INPUT
	WT vs ΔtseV3/tsiV3			ΔtssB vs ΔtseV3/tsiV3			ΔvgrG1 vs ΔtseV3/tsiV3			ΔvgrG2 vs ΔtseV3/tsiV3			ΔvgrG3 vs ΔtseV3/tsiV3
	10^-2	CFU/ml		10^-2	CFU/ml		10^-2	CFU/ml		10^-2	CFU/ml		10^-2	CFU/ml
	328	32800		352	35200		355	35500		372	37200		345	34500
	OUTPUT 20 h
	WT vs ΔtseV3/tsiV3			ΔtssB vs ΔtseV3/tsiV3			ΔvgrG1 vs ΔtseV3/tsiV3			ΔvgrG2 vs ΔtseV3/tsiV3			ΔvgrG3 vs ΔtseV3/tsiV3
	10^-6	CFU/ml		10^-6	CFU/ml		10^-6	CFU/ml		10^-6	CFU/ml		10^-6	CFU/ml
	68	68000000		153	153000000		98	98000000		102	102000000		142	142000000
	OUT/IN	2073.17		OUT/IN	4346.59		OUT/IN	2760.56		OUT/IN	2741.94		OUT/IN	4115.94
	normalized	1		normalized	2.09659		normalized	1.33157		normalized	1.32258		normalized	1.98534
				Prey recovery rate
WT vs ΔtseV3/tsiV3				1
ΔtssB vs ΔtseV3/tsiV3				2.09659
ΔvgrG1 vs ΔtseV3/tsiV3				1.33157
ΔvgrG2 vs ΔtseV3/tsiV3				1.32258
ΔvgrG3 vs ΔtseV3/tsiV3				1.98534

## Sheet: Experiment 3
	INPUT
	WT vs ΔtseV3/tsiV3			ΔtssB vs ΔtseV3/tsiV3			ΔvgrG1 vs ΔtseV3/tsiV3			ΔvgrG2 vs ΔtseV3/tsiV3			ΔvgrG3 vs ΔtseV3/tsiV3
	10^-3	CFU/ml		10^-3	CFU/ml		10^-3	CFU/ml		10^-3	CFU/ml		10^-3	CFU/ml
	122	122000		112	112000		121	121000		123	123000		133	133000
	OUTPUT 20 h
	WT vs ΔtseV3/tsiV3			ΔtssB vs ΔtseV3/tsiV3			ΔvgrG1 vs ΔtseV3/tsiV3			ΔvgrG2 vs ΔtseV3/tsiV3			ΔvgrG3 vs ΔtseV3/tsiV3
	10^-6	CFU/ml		10^-6	CFU/ml		10^-6	CFU/ml		10^-6	CFU/ml		10^-6	CFU/ml
	102	102000000		137	137000000		124	124000000		115	115000000		181	181000000
	OUT/IN	836.066		OUT/IN	1223.21		OUT/IN	1024.79		OUT/IN	934.959		OUT/IN	1360.9
	normalized	1		normalized	1.46306		normalized	1.22573		normalized	1.11828		normalized	1.62775
				Prey recovery rate
WT vs ΔtseV3/tsiV3				1
ΔtssB vs ΔtseV3/tsiV3				1.46306
ΔvgrG1 vs ΔtseV3/tsiV3				1.22573
ΔvgrG2 vs ΔtseV3/tsiV3				1.11828
ΔvgrG3 vs ΔtseV3/tsiV3				1.62775

## Sheet: Experiment 4
	INPUT
	WT vs ΔtseV3/tsiV3			ΔtssB vs ΔtseV3/tsiV3			ΔvgrG1 vs ΔtseV3/tsiV3			ΔvgrG2 vs ΔtseV3/tsiV3			ΔvgrG3 vs ΔtseV3/tsiV3
	10^-2	CFU/ml		10^-2	CFU/ml		10^-2	CFU/ml		10^-2	CFU/ml		10^-2	CFU/ml
	275	27500		234	23400		250	25000		244	24400		223	22300
	OUTPUT 20 h
	WT vs ΔtseV3/tsiV3			ΔtssB vs ΔtseV3/tsiV3			ΔvgrG1 vs ΔtseV3/tsiV3			ΔvgrG2 vs ΔtseV3/tsiV3			ΔvgrG3 vs ΔtseV3/tsiV3
	10^-6	CFU/ml		10^-6	CFU/ml		10^-6	CFU/ml		10^-6	CFU/ml		10^-6	CFU/ml
	111	111000000		135	135000000		116	116000000		125	125000000		138	138000000
	OUT/IN	4036.36		OUT/IN	5769.23		OUT/IN	4640		OUT/IN	5122.95		OUT/IN	6188.34
	normalized	1		normalized	1.42931		normalized	1.14955		normalized	1.2692		normalized	1.53315
				Prey recovery rate
WT vs ΔtseV3/tsiV3				1
ΔtssB vs ΔtseV3/tsiV3				1.42931
ΔvgrG1 vs ΔtseV3/tsiV3				1.14955
ΔvgrG2 vs ΔtseV3/tsiV3				1.2692
ΔvgrG3 vs ΔtseV3/tsiV3				1.53315

## Sheet: Experiment 5
	INPUT
	WT vs ΔtseV3/tsiV3			ΔtssB vs ΔtseV3/tsiV3			ΔvgrG1 vs ΔtseV3/tsiV3			ΔvgrG2 vs ΔtseV3/tsiV3			ΔvgrG3 vs ΔtseV3/tsiV3
	10^-3	CFU/ml		10^-3	CFU/ml		10^-3	CFU/ml		10^-3	CFU/ml		10^-3	CFU/ml
	290	290000		299	299000		286	286000		307	307000		287	287000
	OUTPUT 20 h
	WT vs ΔtseV3/tsiV3			ΔtssB vs ΔtseV3/tsiV3			ΔvgrG1 vs ΔtseV3/tsiV3			ΔvgrG2 vs ΔtseV3/tsiV3			ΔvgrG3 vs ΔtseV3/tsiV3
	10^-6	CFU/ml		10^-6	CFU/ml		10^-6	CFU/ml		10^-6	CFU/ml		10^-6	CFU/ml
	47	47000000		94	94000000		65	65000000		56	56000000		87	87000000
	OUT/IN	162.069		OUT/IN	314.381		OUT/IN	227.273		OUT/IN	182.41		OUT/IN	303.136
	normalized	1		normalized	1.9398		normalized	1.40232		normalized	1.12551		normalized	1.87041
				Prey recovery rate
WT vs ΔtseV3/tsiV3				1
ΔtssB vs ΔtseV3/tsiV3				1.9398
ΔvgrG1 vs ΔtseV3/tsiV3				1.40232
ΔvgrG2 vs ΔtseV3/tsiV3				1.12551
ΔvgrG3 vs ΔtseV3/tsiV3				1.87041

## Sheet: Experiment 6
	INPUT
	WT vs ΔtseV3/tsiV3			ΔtssB vs ΔtseV3/tsiV3			ΔvgrG1 vs ΔtseV3/tsiV3			ΔvgrG2 vs ΔtseV3/tsiV3			ΔvgrG3 vs ΔtseV3/tsiV3
	10^-3	CFU/ml		10^-3	CFU/ml		10^-3	CFU/ml		10^-3	CFU/ml		10^-3	CFU/ml
	314	314000		317	317000		322	322000		323	323000		310	310000
	OUTPUT 20 h
	WT vs ΔtseV3/tsiV3			ΔtssB vs ΔtseV3/tsiV3			ΔvgrG1 vs ΔtseV3/tsiV3			ΔvgrG2 vs ΔtseV3/tsiV3			ΔvgrG3 vs ΔtseV3/tsiV3
	10^-6	CFU/ml		10^-6	CFU/ml		10^-6	CFU/ml		10^-6	CFU/ml		10^-6	CFU/ml
	76	76000000		134	134000000		84	84000000		91	91000000		125	125000000
	OUT/IN	242.038		OUT/IN	422.713		OUT/IN	260.87		OUT/IN	281.734		OUT/IN	403.226
	normalized	1		normalized	1.74647		normalized	1.0778		normalized	1.16401		normalized	1.66596
				Prey recovery rate
WT vs ΔtseV3/tsiV3				1
ΔtssB vs ΔtseV3/tsiV3				1.74647
ΔvgrG1 vs ΔtseV3/tsiV3				1.0778
ΔvgrG2 vs ΔtseV3/tsiV3				1.16401
ΔvgrG3 vs ΔtseV3/tsiV3				1.66596
