# Supplementary material for: Antibacterial T6SS effectors with a VRR-Nuc domain are structure-specific nucleases
Source: eLife journal article supplement (doi:10.7554/elife.82437), 2022-10-13
Supplement: fig4-data1 [file SOS responde (GFP signal).xlsx]

## Sheet: TseV2
TseV2																					Mean-blanck
Exp1	Time (h)	Glucose			mean	AB media			mean	Arabinose			mean	D282A Arabinose			mean	Blanck			Glucose	AB media	Arabinose	D282A
	0	1423503	1523186	1550965	1499218	1419907	1438908	1423211	1427342	1471872	1486680	1528937	1.49583e+06	2176339	2284201	2121720	2.19409e+06	409556			1.08966e+06	1.01779e+06	1.08627e+06	1.78453e+06
	0.5	2275554	2212192	2271785	2253177	2337456	2218344	2062438	2.20608e+06	3334967	3155258	3218158	3.23613e+06	2314260	2342678	2183234	2.28006e+06	452554			1.80062e+06	1.75353e+06	2.78357e+06	1.8275e+06
	1	2592455	2402033	2516534	2503674	2588595	2387145	2250939	2408893	5349298	5067844	4939744	5118962	2489507	2519495	2263836	2.42428e+06	454721			2.04895e+06	1.95417e+06	4.66424e+06	1.96956e+06
	1.5	2922907	2687494	2747224	2785875	2740577	2468802	2321358	2.51025e+06	7429848	6922505	6964604	7.10565e+06	2442084	2578127	2276263	2432158	452786			2.33309e+06	2.05746e+06	6.65287e+06	1.97937e+06
	2	3095738	2954248	3022363	3.02412e+06	2863780	2580004	2399798	2.61453e+06	8641674	8479917	8755841	8.62581e+06	2541900	2635072	2452744	2.54324e+06	439554			2.58456e+06	2.17497e+06	8.18626e+06	2.10369e+06
	2.5	3465032	3291254	3383745	3.38001e+06	2973444	2652740	2542075	2722753	9840870	9638227	9928475	9802524	2745356	2835663	2636390	2.73914e+06	443598			2.93641e+06	2.27916e+06	9.35893e+06	2.29554e+06
	3	3586066	3443920	3487173	3.50572e+06	2954144	2766690	2553074	2.75797e+06	10394708	10274957	10739490	1.04697e+07	2960511	3023890	2862873	2.94909e+06	441095			3.06462e+06	2.31687e+06	1.00286e+07	2.508e+06
	3.5	3696034	3552112	3550418	3.59952e+06	3028992	2844261	2611572	2828275	10950896	10759754	11122474	1.09444e+07	3275125	3317032	3132227	3.24146e+06	440279			3.15924e+06	2.388e+06	10504096	2.80118e+06
	4	3744310	3602679	3643993	3.66366e+06	3086222	2895010	2600762	2.86066e+06	10979691	10927322	10717304	1.08748e+07	3550706	3599857	3371758	3.50744e+06	437460			3.2262e+06	2.4232e+06	1.04373e+07	3.06998e+06
	4.5	3967030	3807028	3862817	3.87896e+06	3158484	2971345	2704562	2944797	11162651	11025873	10744886	1.09778e+07	3874863	3941837	3666473	3.82772e+06	437939			3.44102e+06	2506858	1.05399e+07	3.38979e+06
	5	4035496	3889546	3961845	3.9623e+06	3202484	3028102	2771838	3000808	11260607	11006563	10822731	11029967	4088425	4134055	3831293	4.01792e+06	435096			3.5272e+06	2.56571e+06	1.05949e+07	3.58283e+06
	5.5	4078945	3935068	3996266	4.00343e+06	3282162	3080328	2847369	3069953	11232302	11059839	10950976	11081039	4181839	4237192	3934970	4.118e+06	431816			3.57161e+06	2638137	10649223	3.68618e+06
	6	4203754	4008667	4119689	4.1107e+06	3315233	3125360	2890121	3110238	11400044	11118992	11092181	11203739	4256967	4338066	4014485	4.20317e+06	432879			3.67782e+06	2.67736e+06	1.07709e+07	3.77029e+06
Exp2	Time (h)	Glucose			mean	AB media			mean	Arabinose			mean	D282A Arabinose			mean	Blanck			Glucose	AB media	Arabinose	D282A
	0	1519194	1362116	1395171	1.42549e+06	1441166	1431268	1384878	1419104	1460074	1357450	1457870	1.42513e+06	3042615	2948933	2819841	2.93713e+06	395172			1.03032e+06	1.02393e+06	1.02996e+06	2.54196e+06
	0.5	3370597	3363065	3367044	3366902	3488803	3373480	3452073	3.43812e+06	4170457	4005245	4291392	4155698	3220098	3116978	3002650	3113242	431755			2.93515e+06	3.00636e+06	3.72394e+06	2.68149e+06
	1	3825468	3828547	3735748	3.79659e+06	3686660	3564058	3566436	3605718	6240160	6072186	6162150	6.15817e+06	3437902	3378030	3232572	3.3495e+06	434213			3362375	3.17151e+06	5.72395e+06	2.91529e+06
	1.5	4267856	4287817	4176066	4243913	3803519	3682372	3707191	3.73103e+06	9103160	8767936	8963868	8944988	3706348	3624228	3496040	3608872	430880			3.81303e+06	3300147	8.51411e+06	3.17799e+06
	2	4751402	4746067	4584150	4693873	3912252	3803704	3801922	3.83929e+06	11809895	11487664	11631395	1.1643e+07	3938292	3866400	3760504	3.85507e+06	429792			4.26408e+06	3.4095e+06	1.12132e+07	3.42527e+06
	2.5	4939770	4917203	4772962	4876645	3877958	3754358	3755890	3.79607e+06	13360630	12996944	13237477	1.31984e+07	4274600	4191126	4061388	4.1757e+06	427851			4448794	3.36822e+06	1.27705e+07	3.74785e+06
	3	5139784	5147840	5016490	5.10137e+06	3978980	3833197	3909902	3.90736e+06	14840089	14415182	14685209	1.46468e+07	4624518	4549255	4393874	4522549	426296			4.67508e+06	3481064	14220531	4.09625e+06
	3.5	5305343	5293378	5169576	5256099	4027568	3911176	3953794	3.96418e+06	15829716	15363821	15590847	1.55948e+07	4988145	4901434	4751991	4.88052e+06	427493			4.82861e+06	3.53669e+06	15167302	4.45303e+06
	4	5453518	5467188	5319896	5413534	4058065	3922479	3997638	3.99273e+06	16483330	15973123	16184813	1.62138e+07	5408876	5322836	5112134	5281282	426498			4.98704e+06	3.56623e+06	1.57873e+07	4.85478e+06
	4.5	5587332	5594127	5441843	5.5411e+06	4119883	3986056	4053464	4.05313e+06	17081538	16400951	16765296	1.67493e+07	5723564	5662104	5459558	5.61508e+06	426476			5114625	3.62666e+06	16322786	5.1886e+06
	5	5667444	5656038	5518186	5.61389e+06	4187254	4045804	4091469	4.10818e+06	17296186	16642513	16961972	1.69669e+07	5929340	5857972	5661396	5816236	427158			5.18673e+06	3.68102e+06	1.65397e+07	5.38908e+06
	5.5	5709959	5711638	5572084	5.66456e+06	4186273	4086753	4115218	4.12941e+06	17300536	16731063	17017332	1.70163e+07	6014116	5977952	5765140	5.91907e+06	428428			5.23613e+06	3.70099e+06	1.65879e+07	5.49064e+06
	6	5592958	5600642	5465750	5.55312e+06	4236366	4018989	4012106	4.08915e+06	16691995	16086083	16373316	16383798	6085642	6045382	5872128	6.00105e+06	424993			5.12812e+06	3.66416e+06	1.59588e+07	5.57606e+06
																								0
Exp3	Time (h)	Glucose			mean	AB media			mean	Arabinose			mean	D282A Arabinose			mean	Blanck			Glucose	AB media	Arabinose	D282A
	0	2179636	2378117	2660194	2.40598e+06	2142749	2279281	2557752	2326594	2355263	2270617	2660428	2.42877e+06	2244914	2224615	2207234	2.22559e+06	399908			2.00607e+06	1.92669e+06	2.02886e+06	1.82568e+06
	0.5	3847192	3850834	4027393	3908473	4020106	4038285	4089480	4.04929e+06	4498450	4362792	4728207	4.52982e+06	2513574	2495040	2359842	2456152	434020			3.47445e+06	3.61527e+06	4.0958e+06	2.02213e+06
	1	4104513	4148374	4152146	4135011	4316594	4247630	4289458	4.28456e+06	6350160	6025924	6214842	6.19698e+06	2872307	2849394	2699422	2807041	427185			3.70783e+06	3.85738e+06	5.76979e+06	2.37986e+06
	1.5	4439787	4352919	4467042	4419916	4533650	4397361	4449881	4.4603e+06	8730360	8457867	8910252	8699493	3119936	3127397	2869834	3.03906e+06	428549			3991367	4.03175e+06	8270944	2.61051e+06
	2	4695232	4578856	4691592	4.65523e+06	4664220	4543725	4558125	4588690	10971627	10907413	11270692	1.10499e+07	3389460	3395975	3147680	3.31104e+06	427992			4.22723e+06	4160698	1.06219e+07	2.88305e+06
	2.5	4681396	4592625	4695800	4656607	4703712	4646112	4643486	4.66444e+06	12645685	12536534	13176315	12786178	3690208	3700312	3414208	3601576	428240			4.22837e+06	4.2362e+06	1.23579e+07	3.17334e+06
	3	4821046	4751296	4857555	4.80997e+06	4765556	4693436	4684302	4.71443e+06	13792077	13566745	13953971	13770931	4008976	4043552	3707172	3919900	430835			4.37913e+06	4.2836e+06	1.33401e+07	3.48907e+06
	3.5	4936543	4873554	4979196	4.92976e+06	4825184	4761694	4729050	4771976	14307752	14285576	14761271	14451533	4292898	4449324	4047068	4.2631e+06	431086			4.49868e+06	4.34089e+06	1.40204e+07	3.83201e+06
	4	5075047	5038886	5105587	5.07317e+06	4833924	4792790	4716865	4781193	14604945	14559572	15019750	14728089	4696070	4834662	4400402	4.64371e+06	434254			4.63892e+06	4.34694e+06	1.42938e+07	4.20946e+06
	4.5	5181266	5122438	5192655	5165453	4919719	4862112	4832090	4871307	14984560	14953255	15502768	15146861	4959156	5070950	4622799	4.8843e+06	437159			4.72829e+06	4.43415e+06	1.47097e+07	4447143
	5	5256592	5202890	5262268	5.24058e+06	4948952	4875856	4843800	4889536	15105595	15081917	15402868	1.51968e+07	5111524	5242560	4768106	5040730	441494			4.79909e+06	4.44804e+06	1.47553e+07	4.59924e+06
	5.5	5297397	5261630	5354660	5.30456e+06	4958837	4888833	4906408	4918026	14977136	14994857	15366338	15112777	5219552	5356741	4635100	5.07046e+06	446564			4.858e+06	4471462	14666213	4.6239e+06
	6	5405226	5354518	5399332	5.38636e+06	4997340	4914964	4916665	4.94299e+06	15013481	14953855	15351322	1.51062e+07	5307319	5424786	4668059	5133388	454363			4.932e+06	4.48863e+06	14651856	4.67902e+06

## Sheet: TseV3
TseV3																					Mean-blanck
Exp1	Time (h)	Glucose			mean	AB media			mean	Arabinose			mean	D230A Arabinose			mean	Blanck			Glucose	AB media	Arabinose	D230A
	0	2051736	2332692	2095574	2.16e+06	1934366	1892671	2117051	1.98136e+06	1902677	1854259	1978480	1.91181e+06	2217584	2097251	2192312	2169049	409556			1.75044e+06	1.57181e+06	1502249	1.75949e+06
	0.5	2858349	2846808	2974112	2.89309e+06	2858336	2775717	2861709	2.83192e+06	3719512	3827096	3682103	3.7429e+06	2218258	2215080	2248192	2.22718e+06	452554			2.44054e+06	2.37937e+06	3.29035e+06	1.77462e+06
	1	3170539	3088570	3325516	3194875	3086456	3031731	3100970	3.07305e+06	5580180	5902952	5577894	5.68701e+06	2254640	2391860	2344582	2.33036e+06	454721			2.74015e+06	2.61833e+06	5232288	1.87564e+06
	1.5	3487514	3388542	3446202	3.44075e+06	3222402	3224629	3214753	3.22059e+06	8129350	8859604	8075462	8.35481e+06	2313572	2382300	2351784	2.34922e+06	452786			2.98797e+06	2.76781e+06	7.90202e+06	1.89643e+06
	2	3823333	3747821	3781568	3.78424e+06	3346020	3306654	3361082	3.33792e+06	10169480	10860248	10030930	1.03536e+07	2537306	2627095	2660880	2608427	439554			3.34469e+06	2.89837e+06	9.914e+06	2.16887e+06
	2.5	4089501	4028214	4027574	4.04843e+06	3498986	3446555	3522042	3.48919e+06	11734186	12630398	11662781	1.20091e+07	2841273	2942152	2997344	2926923	443598			3.60483e+06	3.0456e+06	1.15655e+07	2.48333e+06
	3	4164334	4134118	4117947	4.1388e+06	3569386	3528192	3589480	3.56235e+06	12852569	13724333	12593097	1.30567e+07	3197379	3293362	3286999	3.25925e+06	441095			3.6977e+06	3.12126e+06	1.26156e+07	2.81815e+06
	3.5	4200778	4147164	4130800	4.15958e+06	3662914	3521581	3528433	3570976	12985153	13780875	12709166	13158398	3623014	3734568	3747890	3701824	440279			3719302	3.1307e+06	1.27181e+07	3.26155e+06
	4	4316042	4251918	4252890	4.27362e+06	3620062	3621996	3643980	3.62868e+06	13471242	14154492	13102585	1.35761e+07	3781294	3830322	3883769	3831795	437460			3.83616e+06	3.19122e+06	1.31386e+07	3.39434e+06
	4.5	4456490	4492280	4456196	4468322	3691280	3719196	3764206	3724894	13801700	14565566	13541417	13969561	3966104	4052646	4101601	4040117	437939			4030383	3286955	13531622	3602178
	5	4620596	4624714	4563329	4.60288e+06	3787259	3810357	3867249	3.82162e+06	14252260	14764906	13900490	1.43059e+07	4055797	4138052	4147750	4.11387e+06	435096			4.16778e+06	3.38653e+06	1.38708e+07	3.67877e+06
	5.5	4726708	4737138	4710007	4.72462e+06	3895632	3941976	3971454	3936354	14064723	15026912	14048563	14380066	4140643	4219774	4251108	4.20384e+06	431816			4.2928e+06	3504538	13948250	3.77203e+06
	6	4799992	4797248	4809888	4802376	3933715	4030554	4112989	4.02575e+06	14229667	15509792	14271719	1.46704e+07	4224289	4318676	4341547	4.29484e+06	432879			4.3695e+06	3.59287e+06	1.42375e+07	3.86196e+06
Exp2	Time (h)	Glucose			mean	AB media			mean	Arabinose			mean	D230A Arabinose			mean	Blanck			Glucose	AB media	Arabinose	D230A
	0	1448309	1329250	1521370	1.43298e+06	1274358	1288760	1409876	1.32433e+06	1452193	1535862	2125304	1704453	2378384	2521231	2372167	2.42393e+06	395172			1.0378e+06	929160	1.30928e+06	2.02876e+06
	0.5	3439980	3328926	3648441	3472449	3435947	3375164	3333146	3381419	5217145	5301820	5875256	5.46474e+06	2589058	2718600	2367566	2558408	431755			3.04069e+06	2.94966e+06	5.03299e+06	2.12665e+06
	1	3839718	3781888	4153565	3925057	3680302	3635636	3582331	3.63276e+06	7644355	7705714	8464813	7938294	2774904	2913491	2558539	2748978	434213			3.49084e+06	3.19854e+06	7.50408e+06	2.31477e+06
	1.5	4360912	4273940	4621402	4.41875e+06	3872773	3881658	3793512	3.84931e+06	11448503	11559706	12641745	11883318	2996448	3161874	2759926	2.97275e+06	430880			3.98787e+06	3418434	1.14524e+07	2541869
	2	4755648	4664297	4962188	4.79404e+06	4042632	4029578	3938048	4.00342e+06	14943334	15211006	16088707	15414349	3279254	3492466	3010997	3.26091e+06	429792			4.36425e+06	3.57363e+06	1.49846e+07	2.83111e+06
	2.5	4750871	4668373	4738796	4.71935e+06	4055032	4022436	3947654	4008374	16449073	16741311	17377838	16856074	3653560	3909237	3360382	3.64106e+06	427851			4.2915e+06	3580523	16428223	3.21321e+06
	3	4954015	4861844	4992520	4.93613e+06	4219040	4167328	4079880	4155416	18098322	18314606	19021448	1.84781e+07	4080189	4330296	3725856	4045447	426296			4.50983e+06	3.72912e+06	1.80518e+07	3.61915e+06
	3.5	5166530	5120020	5230670	5.17241e+06	4289102	4278338	4224758	4264066	19158034	19336044	19868772	1.94543e+07	4528464	4781260	4060514	4456746	427493			4744914	3.83657e+06	1.90268e+07	4.02925e+06
	4	5326840	5288263	5407454	5.34085e+06	4367060	4365497	4307572	4.34671e+06	19501240	19818358	20354220	1.98913e+07	4944574	5212074	4465258	4.87397e+06	426498			4.91435e+06	3.92021e+06	1.94648e+07	4.44747e+06
	4.5	5494608	5425745	5512994	5.47778e+06	4441277	4405209	4382999	4.40983e+06	20098040	20212490	21038308	2.04496e+07	5258860	5562798	4719760	5.18047e+06	426476			5.05131e+06	3.98335e+06	20023137	4753997
	5	5619318	5524846	5679958	5.60804e+06	4444038	4448418	4448909	4.44712e+06	20183790	20291496	21693618	20722968	5424826	5741374	4843714	5336638	427158			5.18088e+06	4.01996e+06	2.02958e+07	4.90948e+06
	5.5	5676562	5599230	5743531	5.67311e+06	4515109	4544724	4506024	4.52195e+06	20199150	20381604	21585308	2.0722e+07	5503440	5829128	4934106	5.42222e+06	428428			5.24468e+06	4.09352e+06	2.02936e+07	4.9938e+06
	6	5572982	5466756	5653438	5564392	4378390	4428588	4558760	4455246	19882084	19998228	20097564	1.99926e+07	5583625	5903034	5003534	5496731	424993			5.1394e+06	4.03025e+06	19567632	5.07174e+06
																								0
Exp3	Time (h)	Glucose			mean	AB media			mean	Arabinose			mean	D230A Arabinose			mean	Blanck			Glucose	AB media	Arabinose	D230A
	0	3429730	3487370	3777205	3.56477e+06	3441215	3472877	3545705	3486599	3346591	3471874	3758373	3.52561e+06	2162782	2167573	2248061	2.19281e+06	399908			3.16486e+06	3.08669e+06	3.1257e+06	1.7929e+06
	0.5	5302286	5169648	5595068	5.35567e+06	5895300	5849540	5776542	5.84046e+06	6145465	6490108	6475638	6.3704e+06	2369598	2333715	2464444	2.38925e+06	434020			4.92165e+06	5406441	5936384	1.95523e+06
	1	5335443	5240427	5705953	5.42727e+06	5920224	5933858	5895667	5916583	8311388	8561229	8510310	8.46098e+06	2682029	2663810	2815466	2720435	427185			5.00009e+06	5.4894e+06	8.03379e+06	2.29325e+06
	1.5	5618687	5475473	5895712	5.66329e+06	6047976	5964458	6000406	6004280	12270636	12933477	12678071	1.26274e+07	2957126	2955358	3099094	3.00386e+06	428549			5.23474e+06	5575731	1.21988e+07	2.57531e+06
	2	5843548	5667270	6161241	5.89069e+06	6174356	6191548	6178408	6.18144e+06	15810971	16700803	16322469	16278081	3323092	3281014	3427896	3.344e+06	427992			5.46269e+06	5.75345e+06	15850089	2.91601e+06
	2.5	5789968	5605989	6026707	5.80755e+06	6225843	6222304	6246792	6.23165e+06	17789744	18796822	18364086	18316884	3724340	3662622	3863405	3.75012e+06	428240			5.37931e+06	5803406	1.78886e+07	3321882
	3	6018122	5838096	6137606	5.99794e+06	6272282	6301380	6372327	6.31533e+06	19033850	20216538	19465396	19571928	4133042	4078940	4303326	4.17177e+06	430835			5.56711e+06	5.88449e+06	1.91411e+07	3.74093e+06
	3.5	6177274	5958608	6319736	6.15187e+06	6378229	6346142	6409006	6.37779e+06	20373072	21273942	20574830	2.07406e+07	4600941	4543997	4741928	4.62896e+06	431086			5.72079e+06	5.94671e+06	2.03095e+07	4.19787e+06
	4	6323025	6102666	6449222	6.29164e+06	6385311	6416638	6427094	6409681	20581026	21300320	20330242	20737196	4913144	4856033	5045524	4.93823e+06	434254			5.85738e+06	5.97543e+06	2.03029e+07	4.50398e+06
	4.5	6419298	6156676	6549483	6.37515e+06	6409886	6432845	6454680	6.43247e+06	21388486	22026750	21141714	2.1519e+07	5085012	5016681	5206344	5102679	437159			5.93799e+06	5.99531e+06	2.10818e+07	4.66552e+06
	5	6486708	6260678	6666500	6.4713e+06	6442192	6509289	6433316	6461599	21488434	22090632	21251244	2.16101e+07	5197313	5163316	5365302	5241977	441494			6.0298e+06	6.02011e+06	2.11686e+07	4.80048e+06
	5.5	6561054	6317056	6677525	6518545	6448617	6534336	6492136	6.4917e+06	21661132	22179262	21178700	2.1673e+07	5281110	5282952	5446564	5.33688e+06	446564			6071981	6.04513e+06	2.12265e+07	4.89031e+06
	6	6480364	6254568	6570972	6.4353e+06	6468978	6389890	6287138	6382002	21371930	21696506	20783066	21283834	5344938	5325786	5497816	5.38951e+06	454363			5980938	5.92764e+06	2.08295e+07	4935150

## Sheet: Means of 3 exp
TseV2 GFP signal (arbitrary units)	time (h)	Glucose			AB media			Arabinose			D282A
	0	1030322	1089662	2006075	1023933	1017786	1926686	1029960	1086273	2028862	1.78453e+06	2.54196e+06	1.82568e+06
	0.5	2935147	1800624	3474453	3006364	1753526	3615271	3723943	2783574	4095797	1.8275e+06	2.68149e+06	2.02213e+06
	1	3362375	2048953	3707826	3171505	1954172	3857376	5723953	4664242	5769790	1.96956e+06	2.91529e+06	2.37986e+06
	1.5	3813033	2333089	3991367	3300147	2057460	4031748	8514108	6652866	8270944	1.97937e+06	3.17799e+06	2.61051e+06
	2	4264081	2584563	4227235	3409501	2174974	4160698	11213190	8186257	10621920	2.10369e+06	3.42527e+06	2.88305e+06
	2.5	4448794	2936413	4228367	3368218	2279156	4236197	12770500	9358926	12357940	2.29554e+06	3.74785e+06	3.17334e+06
	3	4675076	3064625	4379131	3481064	2316875	4283597	14220530	10028620	13340100	2.508e+06	4.09625e+06	3.48907e+06
	3.5	4828607	3159243	4498678	3536687	2387996	4340890	15167300	10504100	14020450	2.80118e+06	4.45303e+06	3.83201e+06
	4	4987036	3226201	4638919	3566229	2423205	4346939	15787260	10437310	14293840	3.06998e+06	4.85478e+06	4.20946e+06
	4.5	5114625	3441019	4728295	3626659	2506858	4434149	16322790	10539860	14709700	3.38979e+06	5.1886e+06	4447143
	5	5186732	3527200	4799090	3681018	2565713	4448042	16539730	10594870	14755300	3.58283e+06	5.38908e+06	4.59924e+06
	5.5	5236133	3571610	4857999	3700987	2638137	4471462	16587880	10649220	14666210	3.68618e+06	5.49064e+06	4.6239e+06
	6	5128124	3677824	4931996	3664160	2677359	4488627	15958810	10770860	14651860	3.77029e+06	5.57606e+06	4.67902e+06
TseV3 GFP signal (arbitrary units)	time (h)	Glucose			AB media			Arabinose			D230A
	0	1037805	1750444	3164861	929160	1571806	3086691	1309282	1502249	3125705	1.75949e+06	2.02876e+06	1.7929e+06
	0.5	3040694	2440536	4921648	2949664	2379367	5406441	5032985	3290350	5936384	1.77462e+06	2.12665e+06	1.95523e+06
	1	3490844	2740154	5000089	3198544	2618332	5489398	7504082	5232288	8033791	1.87564e+06	2.31477e+06	2.29325e+06
	1.5	3987871	2987967	5234742	3418434	2767809	5575731	11452440	7902019	12198850	1.89643e+06	2541869	2.57531e+06
	2	4364253	3344687	5462695	3573628	2898365	5753446	14984560	9913999	15850090	2.16887e+06	2.83111e+06	2.91601e+06
	2.5	4291496	3604832	5379315	3580523	3045597	5803406	16428220	11565520	17888640	2.48333e+06	3.21321e+06	3321882
	3	4509831	3697705	5567107	3729120	3121258	5884495	18051830	12615570	19141090	2.81815e+06	3.61915e+06	3.74093e+06
	3.5	4744914	3719302	5720786	3836573	3130697	5946706	19026790	12718120	20309530	3.26155e+06	4.02925e+06	4.19787e+06
	4	4914354	3836157	5857384	3920212	3191220	5975427	19464770	13138650	20302940	3.39434e+06	4.44747e+06	4.50398e+06
	4.5	5051307	4030383	5937994	3983353	3286955	5995312	20023140	13531620	21081820	3602178	4753997	4.66552e+06
	5	5180883	4167784	6029802	4019964	3386526	6020105	20295810	13870790	21168610	3.67877e+06	4.90948e+06	4.80048e+06
	5.5	5244680	4292802	6071981	4093525	3504538	6045133	20293590	13948250	21226470	3.77203e+06	4.9938e+06	4.89031e+06
	6	5139399	4369497	5980938	4030253	3592874	5927639	19567630	14237510	20829470	3.86196e+06	5.07174e+06	4935150
