# Supplementary material for: Antibacterial T6SS effectors with a VRR-Nuc domain are structure-specific nucleases
Source: eLife journal article supplement (doi:10.7554/elife.82437), 2022-10-13
Supplement: fig4-data2 [file DAPI measures.xlsx]

## Sheet: TseV2 exp1
TseV2 Glucose			Mean bac - mean background	Mean bac - mean background/1000	TseV2 Arabinose			Mean bac - mean background	Mean bac - mean background/1000
Field1	Area	Mean			Field 1	Area	Mean
1	5.461	113.012			1	8202	102879
2	3.12	3135.43	3022.43	3.02243	1	4.681	1573.06	1470.26	1.47026
3	3.12	2741.34	2628.34	2.62834	2	3.373	2431.01	2328.21	2.32821
4	2.361	2784.45	2671.45	2.67145	3	4.407	2257.6	2154.8	2.1548
5	2.172	3085.26	2972.26	2.97226	4	1.982	1886.68	1783.88	1.78388
6	1.876	2009.78	1896.78	1.89678	5	3.205	2407.06	2304.26	2.30426
7	2.467	2457.97	2344.97	2.34497	6	2.34	3412.69	3309.89	3.30989
8	2.762	1423.72	1310.72	1.31072	7	1.117	3116.98	3014.18	3.01418
9	3.31	2748.62	2635.62	2.63562	8	2.024	1287.07	1184.27	1.18427
10	1.434	785.838	672.838	0.672838	9	1.56	1997.97	1895.17	1.89517
11	2.72	1806.12	1693.12	1.69312	10	1.518	2044.03	1941.23	1.94123
12	2.678	751.646	638.646	0.638646	11	2.867	2695.09	2592.29	2.59229
13	2.635	3189.09	3076.09	3.07609	12	1.181	2976.86	2874.06	2.87406
14	3.226	2965.08	2852.08	2.85208	13	3.247	1719.71	1616.91	1.61691
15	2.129	2468.27	2355.27	2.35527	14	1.413	2138.25	2035.45	2.03545
16	5.608	2933.79	2820.79	2.82079	15	2.551	878.669	775.869	0.775869
17	2.361	3565.29	3452.29	3.45229	16	2.635	2200.13	2097.33	2.09733
18	3.437	3681.91	3568.91	3.56891	17	3.521	1280.44	1177.64	1.17764
19	3.015	2147.8	2034.8	2.0348	18	1.75	368.398	265.598	0.265598
20	2.551	3243.62	3130.62	3.13062	19	2.235	2193.06	2090.26	2.09026
21	3.036	3403.33	3290.33	3.29033	20	4.217	2987.28	2884.47	2.88448
22	2.635	3065.34	2952.34	2.95234	21	2.235	135.349	32.549	0.032549
23	2.446	1990	1877	1.877	22	2.277	1345.2	1242.4	1.2424
24	2.172	3503.94	3390.94	3.39094	23	3.416	2036.17	1933.37	1.93337
25	1.581	1870.04	1757.04	1.75704	24	2.087	844.889	742.089	0.742089
26	1.919	2232.6	2119.6	2.1196	25	2.172	1417.53	1314.73	1.31473
27	2.593	2171.36	2058.36	2.05836	26	1.834	199.54	96.74	0.09674
28	2.003	1902.64	1789.64	1.78964	27	2.467	2523.9	2421.1	2.4211
29	2.024	3279.15	3166.15	3.16615	28	4.196	1084.99	982.195	0.982195
30	1.855	3325.18	3212.18	3.21218	29	4.132	1569.43	1466.63	1.46663
31	2.108	1793.17	1680.17	1.68017	30	3.605	2037.75	1934.95	1.93495
32	2.994	1893.73	1780.73	1.78073	31	3.099	2305.82	2203.02	2.20302
33	3.163	1640.29	1527.29	1.52729	32	8.096	1141.29	1038.49	1.03849
34	2.319	801.664	688.664	0.688664	33	4.702	274.717	171.917	0.171917
35	3.015	3047.72	2934.72	2.93472	34	2.762	2003.13	1900.33	1.90033
36	2.741	3472.85	3359.85	3.35985	35	2.783	2086.13	1983.33	1.98333
37	2.172	2488.49	2375.49	2.37549	36	1.602	2304.26	2201.46	2.20146
39	2.825	2143.82	2030.82	2.03082	37	4.533	1844.11	1741.31	1.74131
40	1.919	2651.19	2538.19	2.53819	38	3.289	1410.72	1307.92	1.30792
41	2.952	1748.45	1635.45	1.63545	39	4.238	2158.93	2056.12	2.05613
42	1.75	3076.12	2963.12	2.96312	40	2.657	2095.04	1992.24	1.99224
43	2.488	2802.77	2689.77	2.68977	41	2.446	902.853	800.053	0.800053
44	1.434	1914.63	1801.63	1.80163	42	2.994	2117.11	2014.31	2.01431
45	2.172	2009.95	1896.95	1.89695	43	3.732	407.192	304.392	0.304392
46	1.876	773.663	660.663	0.660663	44	3.669	2946.86	2844.06	2.84406
47	1.687	637.962	524.962	0.524962	45	1.771	2425.79	2322.99	2.32299
48	1.645	3382.92	3269.92	3.26992	46	1.792	2547.07	2444.27	2.44427
49	4.343	2011.79	1898.79	1.89879	47	2.846	2274.53	2171.73	2.17173
50	2.973	1993.08	1880.08	1.88008	48	4.407	1062.16	959.363	0.959363
51	2.425	3246.99	3133.99	3.13399	49	1.413	1169.69	1066.89	1.06689
					50	3.669	505.517	402.717	0.402717
Field2					51	2.551	2048.84	1946.04	1.94604
1	20.957	101.22
2	3.289	2530.14	2428.92	2.42892	Field 2
3	2.361	2782.9	2681.68	2.68168	1	25.975	88.134
4	2.825	2131.79	2030.57	2.03057	2	1.792	1254.08	1165.98	1.16598
5	2.382	2792.34	2691.12	2.69112	3	4.069	1337.77	1249.67	1.24967
6	4.28	525.443	424.223	0.424223	4	5.946	2409.68	2321.58	2.32158
7	2.066	3078.97	2977.75	2.97775	5	1.223	165.845	77.745	0.077745
8	3.015	1612.67	1511.45	1.51145	6	2.551	2028.39	1940.29	1.94029
9	3.669	1980.69	1879.47	1.87948	7	2.973	2402.61	2314.51	2.31451
10	2.193	228.942	127.722	0.127722	8	2.467	779.838	691.738	0.691738
11	2.699	289.031	187.811	0.187811	9	2.382	2190.72	2102.62	2.10262
12	2.635	1732.01	1630.79	1.63079	10	3.521	1266.72	1178.62	1.17862
13	6.768	881.19	779.97	0.77997	11	4.09	1791.73	1703.63	1.70363
14	2.867	2098.43	1997.21	1.99721	12	2.635	1329.19	1241.09	1.24109
15	1.75	2851.84	2750.62	2.75062	13	2.087	2346.73	2258.63	2.25863
16	2.045	2324.07	2222.85	2.22285	14	2.783	2254.69	2166.59	2.16659
17	1.94	2735.43	2634.22	2.63422	15	2.551	1277.69	1189.59	1.18959
18	1.94	2731.71	2630.49	2.63049	16	2.467	1882.2	1794.11	1.79411
19	2.235	2336.43	2235.21	2.23521	17	1.771	1967.86	1879.76	1.87976
20	3.12	1201.56	1100.34	1.10034	18	2.298	1833.1	1745	1.745
21	2.34	1298.66	1197.44	1.19744	19	2.108	1612.73	1524.63	1.52463
22	3.879	2608.61	2507.39	2.50739	20	1.666	1807.32	1719.22	1.71922
23	1.708	846.864	745.644	0.745644	21	2.319	1177.37	1089.27	1.08927
24	4.322	2745.38	2644.16	2.64416	22	1.855	1187.48	1099.38	1.09938
25	1.876	2854.52	2753.3	2.7533	23	4.175	1443.94	1355.84	1.35584
26	2.34	2227.51	2126.29	2.12629	24	3.858	1990.02	1901.92	1.90192
27	3.711	1431.02	1329.8	1.3298	25	4.09	2695.39	2607.29	2.60729
28	3.837	2742.99	2641.78	2.64177	26	2.361	2208.71	2120.61	2.12061
29	2.277	3325.31	3224.09	3.22409	27	3.395	700.087	611.987	0.611987
30	3.479	2706.35	2605.13	2.60513	28	3.352	1212.81	1124.71	1.12471
31	3.184	2774.95	2673.73	2.67373	29	2.256	2716.46	2628.36	2.62836
32	1.666	1146.81	1045.59	1.04559	30	2.889	289.139	201.039	0.201039
33	3.12	2851.17	2749.95	2.74995	31	4.217	170.315	82.215	0.082215
34	2.72	2053.67	1952.45	1.95245	32	2.804	2395.99	2307.89	2.30789
35	4.976	2071.63	1970.41	1.97041	33	4.175	1095.53	1007.43	1.00743
36	2.425	2088.68	1987.46	1.98746	34	4.385	1015.49	927.39	0.92739
37	2.404	2760.36	2659.14	2.65914	35	3.373	1949.85	1861.75	1.86175
38	3.858	907.749	806.529	0.806529	36	3.12	1969.98	1881.88	1.88188
39	3.12	2869.02	2767.8	2.7678	37	3.458	2048.62	1960.52	1.96052
40	3.184	1886.23	1785.01	1.78501	38	3.816	1818.3	1730.2	1.7302
41	1.919	688.055	586.835	0.586835	39	3.015	1746.66	1658.56	1.65856
42	3.078	1816.2	1714.98	1.71498	40	4.786	1889.83	1801.73	1.80173
43	2.214	589.962	488.742	0.488742	41	2.425	980.47	892.37	0.89237
44	2.699	2709.99	2608.77	2.60877	42	2.635	2401.86	2313.76	2.31376
45	2.277	2948.45	2847.23	2.84723	43	2.108	2829.98	2741.88	2.74188
46	2.151	3079.46	2978.24	2.97824	44	2.889	1877.94	1789.84	1.78984
47	2.783	3759.24	3658.02	3.65802	45	1.645	1465.76	1377.66	1.37766
48	2.678	3044.84	2943.62	2.94362	46	1.792	1782.96	1694.87	1.69487
49	2.635	1731.67	1630.45	1.63045	47	2.235	582.311	494.211	0.494211
50	1.708	2795.74	2694.52	2.69452	48	3.563	424.876	336.776	0.336776
51	1.792	2226.67	2125.45	2.12545	49	2.214	1617.21	1529.11	1.52911
					50	2.488	2260.27	2172.17	2.17217
Field3					51	3.163	2068.01	1979.91	1.97991
1	16.509	96.716
2	2.108	1430.71	1334.01	1.33401	Field 3
3	1.919	1187.37	1090.67	1.09067	1	11.912	89.025
4	5.123	2383.44	2286.74	2.28674	2	2.657	1900.33	1811.33	1.81133
5	3.648	1377.92	1281.22	1.28122	3	2.614	685.145	596.145	0.596145
6	2.319	1716.95	1620.25	1.62025	4	1.876	2202.79	2113.79	2.11379
7	4.09	2940.19	2843.49	2.84349	5	3.205	533.434	444.434	0.444434
8	2.193	364.74	268.04	0.26804	6	3.922	1373.53	1284.53	1.28453
9	3.057	2353.94	2257.24	2.25724	7	4.47	1905.6	1816.6	1.8166
10	2.045	2371.77	2275.07	2.27507	8	3.521	1911.2	1822.2	1.8222
11	3.036	1309.48	1212.78	1.21278	9	3.142	1203.24	1114.24	1.11424
12	1.94	2334.15	2237.45	2.23745	10	1.202	715.596	626.596	0.626596
13	1.982	2612.23	2515.53	2.51553	11	2.277	3023.14	2934.14	2.93414
14	2.382	2800.55	2703.85	2.70385	12	3.078	412.884	323.884	0.323884
15	2.614	1341.49	1244.79	1.24479	13	6.051	1872.58	1783.58	1.78358
16	2.129	1584.56	1487.86	1.48786	14	1.919	1204.46	1115.46	1.11546
17	2.214	1802.78	1706.08	1.70608	15	1.708	1185.58	1096.58	1.09658
18	3.099	2389.05	2292.35	2.29235	16	2.467	2378.05	2289.05	2.28905
19	2.34	2616.59	2519.89	2.51989	17	2.53	1371.97	1282.97	1.28297
20	1.898	2634.84	2538.14	2.53814	18	2.34	2040.71	1951.71	1.95171
21	8.159	1513.24	1416.54	1.41654	19	2.678	559.858	470.858	0.470858
22	2.783	2585.81	2489.11	2.48911	20	2.741	2008.16	1919.16	1.91916
23	2.172	2666.06	2569.36	2.56936	21	2.382	2250.43	2161.43	2.16143
24	2.108	2639.25	2542.55	2.54255	22	2.889	2236.4	2147.4	2.1474
25	2.425	1149.63	1052.93	1.05293	23	3.268	1092.68	1003.68	1.00368
26	2.783	2416.3	2319.6	2.3196	24	3.078	1011.05	922.055	0.922055
27	2.298	2949.92	2853.22	2.85322	25	1.623	2899.6	2810.6	2.8106
28	2.488	2832.28	2735.58	2.73558	26	3.711	1910.8	1821.8	1.8218
29	2.551	2607.74	2511.04	2.51104	27	2.699	681.297	592.297	0.592297
30	1.876	358.416	261.716	0.261716	28	2.193	2281.81	2192.81	2.19281
31	4.364	2942.4	2845.7	2.8457	29	6.325	331.28	242.28	0.24228
32	3.289	2632.47	2535.77	2.53577	30	2.825	1898.34	1809.34	1.80934
33	4.027	1209.29	1112.59	1.11259	31	4.934	1993.38	1904.38	1.90438
34	2.91	1759.72	1663.02	1.66302	32	3.163	2141.05	2052.05	2.05205
35	1.898	1996.38	1899.68	1.89968	33	4.407	518.67	429.67	0.42967
36	1.898	2293.22	2196.52	2.19652	34	2.91	664.667	575.667	0.575667
37	2.614	2750.57	2653.87	2.65387	35	2.298	1922.94	1833.94	1.83394
38	3.036	2840.58	2743.88	2.74388	36	2.34	1934.94	1845.94	1.84594
39	2.151	2529.26	2432.56	2.43256	37	1.898	1168.72	1079.72	1.07972
40	2.193	2949.14	2852.44	2.85244	38	3.563	1390.62	1301.62	1.30162
41	2.72	1514.81	1418.11	1.41811	39	3.142	846.604	757.604	0.757604
42	4.006	2672.56	2575.86	2.57586	40	4.807	1966.92	1877.92	1.87792
43	2.804	3391.47	3294.77	3.29477	41	2.931	359.777	270.777	0.270777
44	3.416	3236.65	3139.95	3.13995	42	2.045	120.639	31.639	0.031639
45	2.404	2867.35	2770.65	2.77065	43	3.669	1490.56	1401.56	1.40156
46	3.964	2726.11	2629.41	2.62941	44	2.846	594.778	505.778	0.505778
47	2.319	2983.94	2887.24	2.88724	45	2.952	1421.83	1332.83	1.33283
48	3.078	2482.62	2385.92	2.38592	46	3.142	1841.21	1752.21	1.75221
49	2.53	1748.23	1651.53	1.65153	47	2.129	1494.62	1405.62	1.40562
50	3.858	2476.36	2379.66	2.37966	48	5.756	704.875	615.875	0.615875
51	3.247	2319.34	2222.64	2.22264	49	4.681	823.144	734.144	0.734144
					50	3.268	723.394	634.394	0.634394
Field4					51	7.4	1273.1	1184.1	1.1841
1	5.166	136.539
2	2.382	1604	1467.5	1.4675	Field 4
3	2.551	3086.69	2950.19	2.95019	1	17.563	90.848
4	2.361	2943.43	2806.93	2.80693	2	2.404	2419.65	2328.85	2.32885
5	3.099	2036.14	1899.64	1.89964	3	3.732	905.316	814.516	0.814516
6	4.09	741.722	605.222	0.605222	4	3.879	1949.12	1858.32	1.85832
7	3.268	3001.53	2865.03	2.86503	5	1.645	2556.54	2465.74	2.46574
8	3.416	2735.72	2599.22	2.59922	6	1.581	316.733	225.933	0.225933
9	2.973	2927.92	2791.42	2.79142	7	2.994	263.218	172.418	0.172418
10	1.455	3438.84	3302.34	3.30234	8	4.744	1911.86	1821.06	1.82106
11	2.699	1594.13	1457.63	1.45763	9	3.226	803.928	713.128	0.713128
12	5.334	3272.11	3135.61	3.13561	10	3.985	843.497	752.697	0.752697
13	3.901	2905.11	2768.61	2.76861	11	2.635	1912.25	1821.45	1.82145
14	3.437	1401.45	1264.95	1.26495	12	4.512	1109.52	1018.72	1.01872
15	3.605	2063.18	1926.68	1.92668	13	2.741	2120.75	2029.95	2.02995
16	2.72	3577.21	3440.71	3.44071	14	2.783	1093.58	1002.78	1.00278
17	5.06	3489.49	3352.99	3.35299	15	2.467	1427.48	1336.68	1.33668
18	2.425	3908.29	3771.79	3.77179	16	1.898	367.289	276.489	0.276489
19	2.298	3057.25	2920.75	2.92075	17	4.048	1821.68	1730.88	1.73088
20	1.771	3820.45	3683.95	3.68395	18	1.413	2505.07	2414.27	2.41427
21	3.837	2899.54	2763.04	2.76304	19	1.961	2258.47	2167.67	2.16767
22	1.434	2537.88	2401.38	2.40138	20	3.226	641.464	550.664	0.550664
23	3.69	1710.48	1573.98	1.57398	21	5.081	487.452	396.652	0.396652
24	1.687	3093.61	2957.11	2.95711	22	3.858	2160.45	2069.65	2.06965
25	3.142	2755.94	2619.44	2.61944	23	2.151	2128.82	2038.02	2.03802
26	1.223	2579.76	2443.26	2.44326	24	4.238	1163.3	1072.5	1.0725
27	2.172	3131.15	2994.65	2.99465	25	3.416	1173.18	1082.38	1.08238
28	2.572	2659.13	2522.63	2.52263	26	2.382	441.912	351.112	0.351112
29	3.057	2451.45	2314.95	2.31495	27	2.994	660.232	569.432	0.569432
30	1.876	2011.48	1874.98	1.87498	28	4.955	391.949	301.149	0.301149
31	3.184	1411.6	1275.1	1.2751	29	2.446	1476.22	1385.42	1.38542
32	3.142	3128.77	2992.27	2.99227	30	3.247	550.5	459.7	0.4597
33	2.635	2727.8	2591.3	2.5913	31	2.151	1656.08	1565.28	1.56528
34	3.289	1452.72	1316.22	1.31622	32	4.512	1500.54	1409.74	1.40974
35	2.024	3612.31	3475.81	3.47581	33	1.518	838.472	747.672	0.747672
36	2.635	3364.02	3227.52	3.22752	34	3.078	866.11	775.31	0.77531
37	3.12	2728.86	2592.36	2.59236	35	1.876	863.416	772.616	0.772616
38	1.645	2137.53	2001.03	2.00103	36	4.111	564.969	474.169	0.474169
39	4.617	3029.99	2893.49	2.89349	37	2.382	1171.45	1080.65	1.08065
40	3.605	1284.2	1147.7	1.1477	38	3.057	2161.54	2070.74	2.07074
41	2.277	1660.59	1524.09	1.52409	39	1.982	470.809	380.009	0.380009
42	2.867	2880.68	2744.18	2.74418	40	5.208	964.016	873.216	0.873216
43	2.172	3266.3	3129.8	3.1298	41	3.837	1255.45	1164.65	1.16465
44	2.193	2215.5	2079	2.079	42	1.919	446.352	355.552	0.355552
45	5.313	2929.45	2792.95	2.79295	43	4.322	1676.96	1586.16	1.58616
46	3.099	2389.38	2252.88	2.25288	44	2.193	1002.94	912.142	0.912142
47	1.497	2882.76	2746.26	2.74626	45	3.943	780.567	689.767	0.689767
48	2.593	2997.63	2861.13	2.86113	46	2.762	1017.59	926.788	0.926788
49	3.795	1749.31	1612.81	1.61281	47	2.572	2361.14	2270.34	2.27034
50	2.973	1323.12	1186.62	1.18662	48	4.428	1536.62	1445.82	1.44582
51	2.319	2781.76	2645.26	2.64526	49	2.91	2242.94	2152.14	2.15214
					50	3.331	919.025	828.225	0.828225
					51	1.518	884.944	794.144	0.794144

## Sheet: TseV2 exp2
TseV2 Glucose					TseV2 Arabinose
Field 1	Area	Mean	Mean bac- background	Mean bac - mean background/1000	Field 1	Area	Mean	Mean bac- background	Mean bac - mean background/1000
1	5.086	84.302			1	8.856	151.512
2	4.237	2128.83	2044.83	2.04483	2	6.332	2384.18	2233.18	2.23318
3	2.352	1167.71	1083.71	1.08371	3	2.995	1716.48	1565.48	1.56548
4	2.853	1892.63	1808.63	1.80863	4	3.829	1802.34	1651.34	1.65133
5	2.768	2403.85	2319.85	2.31985	5	2.631	1797.58	1646.58	1.64658
6	3.6	3312.37	3228.37	3.22837	6	5.348	3009.72	2858.72	2.85872
7	6.334	3797.99	3713.99	3.71399	7	4.129	3551.09	3400.09	3.40009
8	2.64	3650.64	3566.64	3.56664	8	4.877	1535.94	1384.94	1.38494
9	3.286	834.109	750.109	0.750109	9	2.738	1676.88	1525.88	1.52588
10	3.77	2934.37	2850.37	2.85037	10	4.642	2442.86	2291.86	2.29186
11	1.8	3651.63	3567.63	3.56763	11	2.417	2207.96	2056.96	2.05696
12	2.564	3495.84	3411.84	3.41184	12	4.107	2321.78	2170.78	2.17078
13	4.347	2116.22	2032.22	2.03222	13	6.824	2622.01	2471.01	2.47101
14	3.269	2148.64	2064.64	2.06464	14	4.963	3991.47	3840.47	3.84047
15	1.757	3388.51	3304.51	3.30451	15	2.118	1658.45	1507.45	1.50745
16	4.356	3201.66	3117.66	3.11766	16	19.424	2013.1	1862.1	1.8621
17	1.647	3562.65	3478.65	3.47865	17	5.348	3529.57	3378.57	3.37857
18	4.831	2774.87	2690.87	2.69087	18	4.342	1833.68	1682.68	1.68268
19	3.294	1946.97	1862.97	1.86297	19	2.824	1024.91	873.909	0.873909
20	2.004	3505.05	3421.05	3.42105	20	4.621	1605.16	1454.16	1.45416
21	4.058	3570.12	3486.12	3.48612	21	2.674	1779.38	1628.38	1.62838
22	3.625	1071.52	987.515	0.987515	22	4.728	3049.02	2898.02	2.89802
23	3.94	3383.84	3299.84	3.29984	23	3.252	3667.75	3516.75	3.51675
24	2.284	3250.47	3166.47	3.16647	24	3.658	1244.16	1093.16	1.09316
25	4.33	3646.14	3562.14	3.56215	25	3.038	1206.78	1055.78	1.05578
26	1.783	3093.95	3009.95	3.00995	26	6.375	2598.68	2447.68	2.44768
27	2.19	4006.26	3922.26	3.92226	27	2.802	2589.35	2438.35	2.43835
28	3.651	3816.71	3732.71	3.73271	28	2.802	2697.23	2546.23	2.54623
29	3.09	997.308	913.308	0.913308	29	2.631	1880.31	1729.31	1.72931
30	4.568	3266.73	3182.73	3.18273	30	3.187	1743.93	1592.93	1.59293
31	4.941	1216.19	1132.19	1.13219	31	1.904	1535.51	1384.51	1.38451
32	1.885	3019.52	2935.52	2.93552	32	3.572	1637.86	1486.86	1.48686
33	4.024	3322.25	3238.25	3.23825	33	4.706	3235.71	3084.71	3.08471
34	3.023	3474.35	3390.35	3.39035	34	3.53	2643.24	2492.24	2.49224
35	4.831	2342.82	2258.82	2.25882	35	3.551	1505.45	1354.45	1.35445
36	3.175	593.155	509.155	0.509155	36	4.064	2134.43	1983.43	1.98343
37	2.53	1158.71	1074.71	1.07471	37	5.712	1330.85	1179.85	1.17985
38	4.873	2825.73	2741.73	2.74173	38	6.268	2202.13	2051.13	2.05113
39	0.875	2666.74	2582.74	2.58274	39	2.61	2456.53	2305.53	2.30553
40	1.944	3189.5	3105.5	3.1055	40	3.252	2414.07	2263.07	2.26307
41	3.345	3749.03	3665.03	3.66503	41	3.337	2928.05	2777.05	2.77705
42	3.473	2396.74	2312.74	2.31274	42	6.974	2277.46	2126.46	2.12646
43	1.961	3594.28	3510.28	3.51028	43	3.465	1941.46	1790.46	1.79046
44	1.978	1402.41	1318.41	1.31841	44	3.979	1653.23	1502.23	1.50223
45	3.294	3278.56	3194.56	3.19456	45	9.027	2253	2102	2.102
46	2.607	3624.86	3540.86	3.54086	46	2.374	2266.16	2115.16	2.11516
47	2.038	3906.88	3822.88	3.82288	47	5.819	1685.74	1534.74	1.53474
48	2.352	2993.27	2909.27	2.90927	48	2.396	3362.54	3211.54	3.21154
49	2.063	3323.05	3239.05	3.23905	49	3.252	1340.39	1189.39	1.18939
50	5.018	3353.39	3269.39	3.26939	50	4.792	2357.31	2206.31	2.20631
51	3.778	3661.8	3577.8	3.5778	51	2.332	1995.34	1844.34	1.84434
Field 2					Field 2
1	8.847	111.595			1	3.761	57.178
2	3.77	2031.69	1920.69	1.92069	2	2.861	866.923	809.923	0.809923
3	2.725	3513.84	3402.84	3.40284	3	4.789	646.473	589.473	0.589473
4	4.118	2414.46	2303.46	2.30346	4	5.51	1253.19	1196.19	1.19619
5	2.539	2107.87	1996.87	1.99687	5	2.691	941.205	884.205	0.884205
6	2.895	2202.39	2091.39	2.09139	6	3.591	1046.42	989.421	0.989421
7	4.041	1393.29	1282.29	1.28229	7	5.052	1568.55	1511.55	1.51155
8	2.377	1331.73	1220.73	1.22073	8	5.162	717.146	660.146	0.660146
9	4.237	878.383	767.383	0.767383	9	2.42	1806.15	1749.15	1.74915
10	2.955	2348.18	2237.18	2.23718	10	2.802	1086.88	1029.88	1.02988
11	1.129	1564.68	1453.68	1.45368	11	3.311	1032.87	975.874	0.975874
12	2.717	3603.53	3492.53	3.49253	12	3.32	772.373	715.373	0.715373
13	2.581	3682.84	3571.84	3.57184	13	2.445	817.594	760.594	0.760594
14	3.761	3451.85	3340.85	3.34085	14	4.755	911.411	854.411	0.854411
15	4.729	1066.84	955.837	0.955837	15	6.538	622.671	565.671	0.565671
16	1.545	3362.66	3251.66	3.25167	16	3.481	720.271	663.271	0.663271
17	4.763	2948.59	2837.59	2.83759	17	8.728	745.073	688.073	0.688073
18	2.428	3488.82	3377.82	3.37782	18	3.379	1059.15	1002.15	1.00215
19	4.899	3382.32	3271.32	3.27132	19	3.073	725.061	668.061	0.668061
20	1.961	2011.71	1900.71	1.90071	20	1.953	710.743	653.743	0.653743
21	3.286	1809.31	1698.31	1.69831	21	2.581	957.901	900.901	0.900901
22	3.634	3487.01	3376.01	3.37601	22	5.23	1724.81	1667.81	1.66781
23	1.893	873.709	762.709	0.762709	23	3.54	2342.36	2285.36	2.28536
24	3.04	3125.07	3014.07	3.01407	24	3.057	817.633	760.633	0.760633
25	5.255	3277.08	3166.08	3.16608	25	5.06	765.401	708.401	0.708401
26	4.585	3575.13	3464.13	3.46413	26	2.394	1506.17	1449.17	1.44917
27	5.417	1444.32	1333.32	1.33332	27	3.49	1113.98	1056.98	1.05698
28	2.428	2793.11	2682.11	2.6821	28	3.795	981.11	924.11	0.92411
29	2.386	3502.25	3391.25	3.39125	29	5.977	896.737	839.737	0.839737
30	1.69	3987.03	3876.03	3.87603	30	4.865	648.445	591.445	0.591445
31	4.041	3907.25	3796.25	3.79625	31	1.774	976.78	919.78	0.91978
32	2.522	1528.22	1417.22	1.41722	32	3.931	721.555	664.555	0.664555
33	2.377	3689.62	3578.62	3.57862	33	2.717	810.041	753.041	0.753041
34	5.213	1235.46	1124.46	1.12446	34	4.704	901.274	844.274	0.844274
35	3.838	2386.1	2275.1	2.2751	35	4.806	773.461	716.461	0.716461
36	2.08	1084.16	973.163	0.973163	36	1.741	1029.82	972.815	0.972815
37	3.362	3853.43	3742.43	3.74243	37	2.343	859.025	802.025	0.802025
38	4.024	3061.39	2950.39	2.95039
39	3.49	1124.97	1013.97	1.01397	Field 3
40	3.999	2985.58	2874.58	2.87458	1	5.952	44.71
41	4.203	2399.99	2288.99	2.28899	2	5.315	742.481	698.481	0.698481
42	4.423	3217.57	3106.57	3.10657	3	3.923	723.844	679.844	0.679844
43	3.778	2558.31	2447.31	2.44731	4	2.844	1136.98	1092.98	1.09298
44	2.445	2963.92	2852.92	2.85292	5	3.473	785.738	741.738	0.741738
45	4.279	1165.4	1054.4	1.0544	6	3.973	1586.17	1542.17	1.54217
46	3.668	1586.26	1475.26	1.47526	7	3.855	607.956	563.956	0.563956
47	2.64	2894.19	2783.19	2.78319	8	5.858	1859.03	1815.03	1.81503
48	2.768	1723.2	1612.2	1.6122	9	5.892	1421.2	1377.2	1.3772
49	2.607	756.993	645.993	0.645993	10	3.923	1395.07	1351.07	1.35107
50	2.853	1050.29	939.292	0.939292	11	3.634	737.259	693.259	0.693259
51	1.511	3038.43	2927.43	2.92743	12	2.725	710.963	666.963	0.666963
					13	5.553	1342.99	1298.99	1.29899
Field 3					14	2.318	999.52	955.52	0.95552
1	3.634	214.091			15	2.309	1480.1	1436.1	1.4361
2	4.296	762.658	548.658	0.548658	16	4.772	1136.18	1092.18	1.09218
3	3.99	2780.66	2566.66	2.56666	17	3.133	1421.74	1377.74	1.37774
4	2.674	2936.52	2722.52	2.72252	18	3.124	874.022	830.022	0.830022
5	2.505	2794.45	2580.45	2.58045	19	4.152	1374.27	1330.27	1.33027
6	2.241	2473.77	2259.77	2.25977	20	3.328	1621.08	1577.08	1.57708
7	3.167	2567.22	2353.22	2.35323	21	1.97	959.621	915.621	0.915621
8	2.318	1237.04	1023.04	1.02304	22	2.776	1661.02	1617.02	1.61702
9	1.876	3542.82	3328.82	3.32882	23	5.06	1284.9	1240.9	1.2409
10	3.073	3068.95	2854.95	2.85495	24	4.644	1415.25	1371.25	1.37125
11	2.386	2829.11	2615.11	2.61511	25	2.386	820.562	776.562	0.776562
12	1.944	1519.86	1305.86	1.30586	26	5.689	1035.14	991.143	0.991143
13	2.012	1110.92	896.924	0.896924	27	4.288	1564.68	1520.68	1.52068
14	2.844	3021.05	2807.05	2.80705	28	2.691	733.568	689.568	0.689568
15	2.148	3463.3	3249.3	3.2493	29	1.613	710.553	666.553	0.666553
16	2.734	3434.42	3220.42	3.22042	30	3.057	841.653	797.653	0.797653
17	2.921	2945.3	2731.3	2.7313	31	4.389	1260.05	1216.05	1.21605
18	2.598	3125.48	2911.48	2.91148	32	6.656	1392.97	1348.97	1.34897
19	2.462	3013.45	2799.45	2.79945	33	8.422	750.623	706.623	0.706623
20	2.725	2914.81	2700.81	2.70081	34	2.972	1193.87	1149.87	1.14987
21	3.057	1862.98	1648.98	1.64898	35	4.118	929.786	885.786	0.885786
22	4.695	2632.58	2418.58	2.41858	36	3.337	872.534	828.534	0.828534
23	2.182	2295	2081	2.081	37	6.818	997.528	953.528	0.953528
24	2.615	884.695	670.695	0.670695	38	5.086	1586.56	1542.56	1.54256
25	2.157	1469.79	1255.79	1.25579	39	3.651	1129.76	1085.76	1.08576
26	5.111	2908.07	2694.07	2.69407	40	1.774	737.053	693.053	0.693053
27	2.36	1260.51	1046.51	1.04651	41	4.415	1970.87	1926.87	1.92687
28	2.802	2793.21	2579.21	2.57921	42	1.511	1109.01	1065.01	1.06501
29	2.505	3545.29	3331.29	3.33129	43	2.64	1311.33	1267.33	1.26733
30	1.859	3472.08	3258.08	3.25808	44	2.887	978.25	934.25	0.93425
31	2.522	1012.92	798.916	0.798916	45	3.328	714.523	670.523	0.670523
32	2.012	2916.76	2702.76	2.70276
33	2.403	3585.23	3371.23	3.37123	Field 4
34	2.131	2864.32	2650.32	2.65032	1	8.881	47.279
35	2.938	2994.46	2780.46	2.78046	2	2.989	1042.29	995.287	0.995287
36	2.751	3289.85	3075.85	3.07585	3	3.982	1431.81	1384.81	1.38481
37	2.216	3318.22	3104.22	3.10421	4	3.141	349.384	302.384	0.302384
38	2.241	2748.34	2534.34	2.53434	5	4.143	522.846	475.846	0.475846
39	2.326	3581.34	3367.34	3.36734	6	2.53	1173.02	1126.02	1.12602
40	2.462	3598.67	3384.67	3.38467	7	2.921	995.663	948.663	0.948663
41	3.226	3533.06	3319.06	3.31906	8	4.007	913.398	866.398	0.866398
42	2.241	2268.17	2054.17	2.05417	9	3.124	1106.23	1059.23	1.05923
43	3.821	2933.65	2719.65	2.71965	10	5.086	1337.69	1290.69	1.29069
44	3.014	3231.99	3017.99	3.01799	11	8.618	1163.65	1116.65	1.11665
45	2.258	2729.61	2515.61	2.5156	12	4.356	1252.64	1205.64	1.20564
46	3.167	3588.3	3374.3	3.3743	13	5.833	1198.14	1151.14	1.15114
47	2.776	2930.16	2716.16	2.71617	14	2.072	1774.36	1727.36	1.72736
48	3.26	2600.04	2386.04	2.38604	15	4.271	865.972	818.972	0.818972
49	3.71	1789.79	1575.79	1.57579	16	2.233	896.471	849.471	0.849471
50	2.437	1817.65	1603.65	1.60366	17	2.08	1025.09	978.094	0.978094
51	2.182	979.7	765.7	0.7657	18	2.921	1154.47	1107.47	1.10747
					19	4.406	1087.4	1040.4	1.0404
Field 4					20	1.978	834.811	787.811	0.787811
1	15.24	71.503			21	5.79	1055.67	1008.67	1.00867
2	5.052	1239.8	1168.8	1.1688	22	1.919	1068.89	1021.89	1.02189
3	2.657	826.853	755.853	0.755853	23	3.787	925.415	878.415	0.878415
4	3.481	2074.77	2003.77	2.00377	24	2.904	859.924	812.924	0.812924
5	3.388	2804.37	2733.37	2.73337	25	2.335	1301.62	1254.62	1.25462
6	1.511	1353.07	1282.07	1.28207	26	4.61	1730.09	1683.09	1.68309
7	3.94	636.504	565.504	0.565504	27	6.86	1456.59	1409.59	1.40959
8	3.651	2650.86	2579.86	2.57986	28	4.763	817.226	770.226	0.770226
9	2.148	2169.6	2098.6	2.0986	29	1.859	547.119	500.119	0.500119
10	2.403	1639.56	1568.56	1.56856	30	2.258	679.914	632.914	0.632914
11	2.428	2883.69	2812.69	2.81269	31	2.369	870.484	823.484	0.823484
12	3.642	690.839	619.839	0.619839	32	6.096	1846.07	1799.07	1.79907
13	2.793	2534.05	2463.05	2.46305	33	3.838	889.726	842.726	0.842726
14	2.233	2627.62	2556.62	2.55662	34	1.936	482.294	435.294	0.435294
15	2.887	1654.28	1583.28	1.58328
16	2.369	944.032	873.032	0.873032	Field 5
17	3.557	1618.29	1547.29	1.54729	1	4.296	46.621
18	3.379	1204.14	1133.14	1.13314	2	2.64	923.373	877.373	0.877373
19	3.354	3256.16	3185.16	3.18516	3	2.14	1150.9	1104.9	1.10491
20	3.133	2063.23	1992.23	1.99223	4	4.186	1015.57	969.572	0.969572
21	4.525	2292.16	2221.16	2.22116	5	5.289	886.188	840.188	0.840188
22	1.987	1065.72	994.718	0.994718	6	5.408	1821.13	1775.13	1.77513
23	1.953	1246.57	1175.57	1.17557	7	3.057	1692.72	1646.72	1.64672
24	2.292	2817.72	2746.72	2.74672	8	3.252	1339.41	1293.41	1.29341
25	2.428	1343.41	1272.41	1.27241	9	3.999	1049.5	1003.5	1.0035
26	2.445	2109.59	2038.59	2.03859	10	3.124	682.177	636.177	0.636177
27	1.639	2232.72	2161.72	2.16172	11	3.192	2419.45	2373.45	2.37345
28	2.819	1589.15	1518.15	1.51815	12	2.386	1347.52	1301.52	1.30152
29	3.625	2408.56	2337.56	2.33756	13	4.678	2161.47	2115.47	2.11546
30	1.757	1148.76	1077.76	1.07776	14	3.04	618.858	572.858	0.572858
31	3.685	2692.91	2621.91	2.62191	15	2.708	1658.83	1612.83	1.61283
32	3.396	941.215	870.215	0.870215	16	1.842	1882.67	1836.67	1.83667
33	4.78	1060.62	989.615	0.989615	17	1.8	1774.57	1728.57	1.72857
34	2.369	958.516	887.516	0.887516	18	2.674	1268.08	1222.08	1.22208
35	2.64	947.839	876.839	0.876839	19	2.87	871.592	825.592	0.825592
36	2.114	2770.6	2699.6	2.6996	20	7.259	1810.76	1764.76	1.76476
37	1.35	2682.75	2611.75	2.61175	21	4.406	1630.92	1584.92	1.58492
38	2.725	2945.04	2874.04	2.87404	22	4.831	693.316	647.316	0.647316
39	2.819	885.012	814.012	0.814012	23	4.856	515.206	469.206	0.469206
40	2.751	684.84	613.84	0.61384	24	3.099	1118.88	1072.88	1.07288
41	2.556	2797.84	2726.84	2.72684	25	1.817	773.304	727.304	0.727304
42	1.698	2093.88	2022.88	2.02287	26	3.753	801.432	755.432	0.755432
43	1.851	606.468	535.468	0.535468	27	4.339	757.75	711.75	0.71175
44	1.698	1108.09	1037.09	1.03709	28	7.2	851.033	805.033	0.805033
45	1.825	1327.44	1256.44	1.25644	29	2.963	875.648	829.648	0.829648
46	4.695	1987.22	1916.22	1.91622	30	3.014	1122.7	1076.7	1.0767
47	3.473	1545.69	1474.69	1.47469	31	3.549	1585.24	1539.24	1.53924
48	2.802	2525.34	2454.34	2.45434	32	2.055	966.917	920.917	0.920917
49	2.063	2401.32	2330.32	2.33032	33	1.605	1631.92	1585.92	1.58592
50	3.371	776.189	705.189	0.705189	34	5.357	1357.23	1311.23	1.31123
51	3.107	2085.25	2014.25	2.01425	35	1.978	920.219	874.219	0.874219
					36	6.257	963.879	917.879	0.917879
					37	4.084	1130.86	1084.86	1.08486
					38	3.209	621.069	575.069	0.575069
					199

## Sheet: TseV2 exp3
TseV2 Glucose					TseV3 Arabinose
Field 1	Area	Mean	Mean bac- background	Mean bac - mean background/1000	Field 1	Area	Mean	Mean bac- mean background	Mean bac - mean background/1000
1	3.201	65.464			1	4.695	67.273
2	3.54	743.918	678.918	0.678918	2	2.19	841.752	774.752	0.774752
3	2.581	1949.72	1884.72	1.88472	3	2.895	869.765	802.765	0.802765
4	2.649	808.135	743.135	0.743135	4	6.622	481.394	414.394	0.414394
5	4.033	1414.32	1349.32	1.34932	5	3.209	1622.51	1555.51	1.55551
6	4.313	1244.71	1179.71	1.17971	6	4.177	1861.07	1794.07	1.79407
7	2.556	2197.74	2132.74	2.13274	7	3.6	846.439	779.439	0.779439
8	4.024	1813.53	1748.53	1.74853	8	2.615	1081.75	1014.75	1.01475
9	5.366	1210.1	1145.1	1.1451	9	2.861	949.157	882.157	0.882157
10	7.387	1614.76	1549.76	1.54976	10	2.352	932.874	865.874	0.865874
11	2.691	1566.67	1501.67	1.50167	11	4.576	909.959	842.959	0.842959
12	6.215	1129.1	1064.1	1.0641	12	3.057	1212.66	1145.66	1.14566
13	4.041	1716.01	1651.01	1.65101	13	2.657	1282.78	1215.78	1.21578
14	2.216	1464.79	1399.79	1.39979	14	6.555	1390.52	1323.52	1.32352
15	5.298	1856.39	1791.39	1.79139	15	5.094	1616.65	1549.65	1.54965
16	3.753	1527.38	1462.38	1.46238	16	2.233	717.555	650.555	0.650555
17	4.016	1189.37	1124.37	1.12437	17	2.063	1009.61	942.605	0.942605
18	3.235	1474.31	1409.31	1.40931	18	3.337	930.7	863.7	0.8637
19	2.751	975.194	910.194	0.910194	19	2.7	1648.24	1581.24	1.58124
20	2.827	1622.73	1557.73	1.55773	20	1.851	889.954	822.954	0.822954
					21	3.481	1071.1	1004.1	1.0041
Field 2					22	2.768	1319.76	1252.76	1.25276
1	5.179	41.359			23	1.121	778.848	711.848	0.711848
2	2.224	818.454	777.454	0.777454	24	1.375	740.864	673.864	0.673864
3	2.046	1332.93	1291.93	1.29193	25	4.559	1304.8	1237.8	1.2378
4	4.636	1202.88	1161.88	1.16187	26	2.258	879.88	812.88	0.81288
5	3.456	1530.78	1489.78	1.48978	27	3.201	394.931	327.931	0.327931
6	1.681	903.571	862.571	0.862571	28	1.978	766.352	699.352	0.699352
7	1.953	1690.38	1649.38	1.64938	29	3.141	673.538	606.538	0.606538
8	3.999	1916.2	1875.2	1.8752	30	5.052	684.709	617.709	0.617709
9	4.491	2209.48	2168.48	2.16848	31	2.369	923.71	856.71	0.85671
10	2.021	1620.2	1579.2	1.5792	32	1.808	833.249	766.249	0.766249
11	4.271	942.901	901.901	0.901901	33	2.734	1012.95	945.95	0.94595
12	4.228	1556.36	1515.36	1.51536	34	3.057	539.306	472.306	0.472306
13	5.077	1025.84	984.844	0.984844	35	4.822	1121.4	1054.4	1.05441
14	3.371	1058.72	1017.72	1.01772	36	3.014	881.093	814.093	0.814093
15	6.249	1170.77	1129.77	1.12977	37	1.579	1008.67	941.667	0.941667
16	3.642	703.422	662.422	0.662422	38	2.632	858.816	791.816	0.791816
17	3.625	1162.09	1121.09	1.12109	39	3.158	1236.38	1169.38	1.16938
18	3.761	1129.08	1088.08	1.08808	40	3.583	1216.69	1149.69	1.14969
19	1.095	1838.58	1797.58	1.79758	41	1.885	999.896	932.896	0.932896
20	4.423	1362.5	1321.5	1.3215	42	3.099	1259.9	1192.9	1.1929
21	2.929	1906.43	1865.43	1.86543	43	3.023	1515.59	1448.59	1.44859
22	4.101	1487.1	1446.1	1.4461	44	3.447	728.31	661.31	0.66131
23	3.014	1652.11	1611.11	1.61111	45	4.856	1080.08	1013.08	1.01308
24	1.808	3312.13	3271.13	3.27113	46	3.6	962.21	895.21	0.89521
25	1.316	1594.89	1553.89	1.55389	47	2.836	887.458	820.458	0.820458
26	2.046	1937.24	1896.24	1.89624
27	2.802	1438.98	1397.98	1.39798	Field 2
28	2.683	675.006	634.006	0.634006	1	3.133	59.604
29	2.802	1626.96	1585.96	1.58596	2	2.36	824.579	765.579	0.765579
					3	2.36	929.173	870.173	0.870173
Field 3					4	2.165	908.2	849.2	0.8492
1	4.143	40.541			5	5.298	1482.94	1423.94	1.42394
2	2.386	840.445	800.445	0.800445	6	2.683	1593.05	1534.05	1.53405
3	2.725	1334.96	1294.96	1.29496	7	5.043	1754.77	1695.77	1.69577
4	2.793	1296.65	1256.65	1.25665	8	3.073	910.456	851.456	0.851456
5	3.133	1589.91	1549.91	1.54991	9	3.481	988.027	929.027	0.929027
6	2.148	901.336	861.336	0.861336	10	5.663	1123.45	1064.45	1.06445
7	2.649	1023.09	983.093	0.983093	11	2.216	1298.74	1239.74	1.23974
8	2.666	813.025	773.025	0.773025	12	3.651	978.902	919.902	0.919902
9	1.562	1709.73	1669.73	1.66973	13	1.885	947.05	888.05	0.88805
10	2.513	1504.36	1464.36	1.46436	14	2.853	905.652	846.652	0.846652
11	2.972	1921.44	1881.44	1.88144	15	2.496	830.102	771.102	0.771102
12	3.566	2273.76	2233.76	2.23376	16	7.31	1284.88	1225.88	1.22588
13	3.804	1713.09	1673.09	1.67308	17	2.887	926.026	867.026	0.867026
14	3.473	1681.64	1641.64	1.64165	18	4.381	1420.13	1361.13	1.36113
15	6.351	835.969	795.969	0.795969	19	1.893	1173.68	1114.68	1.11468
16	3.634	1121.18	1081.18	1.08118	20	2.275	1080.63	1021.63	1.02163
17	3.506	805.508	765.508	0.765508	21	3.71	666.398	607.398	0.607398
18	2.912	1062.38	1022.38	1.02238	22	1.919	895.235	836.235	0.836235
19	5.222	1259.37	1219.37	1.21937	23	5.315	832.126	773.126	0.773126
20	3.006	1251.99	1211.99	1.21199	24	4.084	1579.82	1520.82	1.52082
21	2.683	1440.16	1400.16	1.40016	25	3.048	935.518	876.518	0.876518
22	2.479	2920.28	2880.28	2.88028	26	4.525	657.214	598.214	0.598214
23	4.22	1403.15	1363.15	1.36315	27	2.793	688.805	629.805	0.629805
24	1.562	1734.56	1694.56	1.69456	28	3.201	726.05	667.05	0.66705
25	3.473	1582.38	1542.38	1.54238	29	1.842	786.041	727.041	0.727041
26	1.859	1904.76	1864.76	1.86476	30	2.36	429.04	370.04	0.37004
27	3.277	1449.08	1409.08	1.40908	31	3.141	1053.19	994.189	0.994189
28	2.157	1516.08	1476.08	1.47608	32	1.528	340.65	281.65	0.28165
29	2.768	1631.06	1591.06	1.59106	33	3.337	773.758	714.758	0.714758
30	3.906	1224.37	1184.37	1.18437	34	2.844	1344.24	1285.24	1.28524
					35	3.744	542.485	483.485	0.483485
Field 4					36	3.133	1221.47	1162.47	1.16247
1	4.373	44.124			37	3.473	788.482	729.482	0.729482
2	3.651	1379.82	1335.82	1.33582	38	1.596	948.622	889.622	0.889622
3	2.573	2300.66	2256.66	2.25666	39	4.058	1158.03	1099.03	1.09903
4	2.861	890.582	846.582	0.846582	40	3.668	1151.84	1092.84	1.09284
5	1.868	905.509	861.509	0.861509	41	2.36	1103.28	1044.28	1.04428
6	3.09	1671.34	1627.34	1.62734	42	5.196	1314.47	1255.47	1.25547
7	2.666	1952.44	1908.44	1.90844	43	2.81	808.616	749.616	0.749616
8	1.995	1363.77	1319.77	1.31977	44	3.821	691.522	632.522	0.632522
9	1.63	1331.31	1287.31	1.28731
10	1.537	996.923	952.923	0.952923	Field 3
11	6.011	1254.76	1210.76	1.21076	1	7.548	41.354
12	1.851	1209.46	1165.46	1.16546	2	6.291	620.043	579.043	0.579043
13	3.651	1276.72	1232.72	1.23272	3	2.776	313.19	272.19	0.27219
14	2.233	1274.24	1230.24	1.23024	4	2.352	1337.4	1296.4	1.2964
15	3.71	1423.91	1379.91	1.37991	5	4.755	888.123	847.123	0.847123
16	2.768	992.988	948.988	0.948988	6	2.598	653.046	612.046	0.612046
17	3.167	1360.33	1316.33	1.31633	7	3.328	555.122	514.122	0.514122
18	2.539	1479.58	1435.58	1.43558	8	3.277	1184.49	1143.49	1.14349
19	2.233	2270.61	2226.61	2.22661	9	3.141	471.843	430.843	0.430843
20	5.366	1977.98	1933.98	1.93398	10	4.313	916.467	875.467	0.875467
21	1.766	2443.89	2399.89	2.39989	11	4.152	799.953	758.953	0.758953
22	3.235	1604.49	1560.49	1.56049	12	3.753	541.271	500.271	0.500271
23	5.468	1334.26	1290.26	1.29026	13	3.566	851.948	810.948	0.810948
24	3.218	892.156	848.156	0.848156	14	2.657	2056.16	2015.16	2.01516
25	3.124	972.731	928.731	0.928731	15	3.345	1254.45	1213.45	1.21345
26	2.199	1451.93	1407.93	1.40793	16	2.42	1825.81	1784.81	1.78481
27	4.041	2340.53	2296.53	2.29653	17	2.097	506.68	465.68	0.46568
28	3.031	1532.26	1488.26	1.48826	18	2.352	1200.73	1159.73	1.15973
29	2.64	1432.96	1388.96	1.38896	19	2.309	1122.92	1081.92	1.08192
30	3.116	1221.88	1177.88	1.17788	20	2.921	1727.33	1686.33	1.68633
31	2.505	1550.66	1506.66	1.50666	21	2.819	380.75	339.75	0.33975
32	3.362	2374.78	2330.78	2.33078	22	3.778	652.058	611.058	0.611058
33	2.64	1291.35	1247.35	1.24735	23	3.566	853.498	812.498	0.812498
34	3.761	1421.6	1377.6	1.3776	24	3.676	654.383	613.383	0.613383
35	2.165	683.059	639.059	0.639059	25	2.734	557.696	516.696	0.516696
36	3.566	1039.56	995.562	0.995562	26	2.853	1099.73	1058.73	1.05873
					27	2.454	482.433	441.433	0.441433
Field 5
1	3.591	42.111			Field 4
2	1.783	789.548	747.548	0.747548	1	2.657	40.636
3	2.157	822.717	780.717	0.780717	2	2.233	1601.81	1561.81	1.56181
4	2.649	1365.27	1323.27	1.32327	3	3.634	1113.9	1073.9	1.0739
5	2.496	1385.3	1343.3	1.3433	4	5.222	1134.79	1094.79	1.09479
6	5.485	912.619	870.619	0.870619	5	3.753	342.735	302.735	0.302735
7	1.995	1183.97	1141.97	1.14197	6	2.224	1404.59	1364.59	1.36459
8	3.082	1334.01	1292.01	1.29201	7	3.09	631.695	591.695	0.591695
9	4.22	1607.88	1565.88	1.56587	8	2.377	1006.52	966.521	0.966521
10	2.08	1514.78	1472.78	1.47278	9	2.836	859.997	819.997	0.819997
11	6.937	702.092	660.092	0.660092	10	2.19	308.872	268.872	0.268872
12	3.617	2078.41	2036.41	2.03641	11	3.26	853.495	813.495	0.813495
13	2.437	953.488	911.488	0.911488	12	2.241	365.375	325.375	0.325375
14	3.693	993.906	951.906	0.951906	13	3.26	979.688	939.688	0.939688
15	2.87	1700.05	1658.05	1.65805	14	3.642	432.089	392.089	0.392089
16	4.856	1302.15	1260.15	1.26015	15	2.793	547.559	507.559	0.507559
17	4.22	932.966	890.966	0.890966	16	2.386	1570.81	1530.81	1.53081
18	4.534	991.661	949.661	0.949661	17	4.78	1089.01	1049.01	1.04901
19	2.301	856.823	814.823	0.814823	18	2.335	678.422	638.422	0.638422
20	7.726	1337.75	1295.75	1.29575	19	2.683	1054.65	1014.65	1.01465
21	2.657	675.374	633.374	0.633374	20	3.141	1521.83	1481.83	1.48183
22	4.746	1288.33	1246.33	1.24633	21	3.396	959.212	919.212	0.919212
23	6.512	1132.96	1090.96	1.09096	22	2.81	1276.18	1236.18	1.23618
24	3.863	1176.42	1134.42	1.13442	23	3.447	842.436	802.436	0.802436
25	7.921	1340.29	1298.29	1.29829	24	2.793	1284.9	1244.9	1.2449
26	2.674	888.229	846.229	0.846229	25	2.437	920.251	880.251	0.880251
27	2.556	694.096	652.096	0.652096	26	4.432	705.709	665.709	0.665709
28	2.063	1063.49	1021.49	1.02149	27	1.715	1876.9	1836.9	1.8369
29	2.819	981.937	939.937	0.939937	28	4.041	740.3	700.3	0.7003
30	3.838	1051.45	1009.45	1.00945	29	2.844	1147.17	1107.17	1.10717
31	2.106	1614.29	1572.29	1.57229	30	3.973	606.212	566.212	0.566212
32	3.014	1367.33	1325.33	1.32533	31	2.377	809.746	769.746	0.769746
33	2.479	1307.2	1265.2	1.2652	32	2.403	694.307	654.307	0.654307
34	4.305	1546.14	1504.14	1.50414	33	3.226	1514.24	1474.24	1.47424
35	3.685	2115.99	2073.99	2.07399	34	2.7	525.626	485.626	0.485626
					35	3.753	1584.25	1544.25	1.54425
Field 6					36	2.674	790.81	750.81	0.75081
1	7.252	108.608			37	5.154	199.245	159.245	0.159245
2	2.717	2753.63	2645.63	2.64563	38	5.171	905.544	865.544	0.865544
3	2.096	799.102	691.102	0.691102	39	4.907	675.244	635.244	0.635244
4	2.396	3180.15	3072.15	3.07215	40	2.598	665.598	625.598	0.625598
5	5.198	2983.92	2875.92	2.87592	41	6.155	1114.3	1074.3	1.07429
6	5.54	2231.17	2123.17	2.12317
7	4.107	2859.74	2751.74	2.75174	Field 5
8	4	2822.66	2714.66	2.71466	1	6.46	116.917
9	5.07	2200.38	2092.38	2.09238	2	5.904	2146.45	2030.45	2.03045
10	9.583	3010.18	2902.18	2.90218	3	4.428	2706.67	2590.67	2.59067
11	6.353	2327.62	2219.62	2.21962	4	2.396	2297.55	2181.55	2.18155
12	4.492	1779.04	1671.04	1.67104	5	3.658	2702.32	2586.32	2.58632
13	3.615	1845.17	1737.17	1.73717	6	1.39	2285.05	2169.05	2.16905
14	6.888	1931.47	1823.47	1.82347	7	1.626	1358.43	1242.43	1.24243
15	6.803	3019.03	2911.03	2.91103	8	5.134	849.733	733.733	0.733733
16	3.508	3331.87	3223.87	3.22387	9	3.765	1812.23	1696.23	1.69623
17	3.53	3249.59	3141.59	3.14159	10	2.888	1438	1322	1.322
18	4.471	3148.35	3040.35	3.04035	11	3.658	2722.94	2606.94	2.60694
19	4.92	1935.54	1827.54	1.82754	12	3.786	1700.33	1584.33	1.58433
20	6.161	2730.05	2622.05	2.62204	13	3.145	3003.18	2887.18	2.88718
21	4.193	2694.67	2586.67	2.58667	14	2.332	1987.26	1871.26	1.87126
22	3.508	2181.62	2073.62	2.07362	15	5.048	2283.2	2167.2	2.16719
23	4.236	3066.94	2958.94	2.95894	16	2.032	1139.44	1023.44	1.02344
24	3.209	1338.27	1230.27	1.23027	17	2.866	1928.48	1812.48	1.81248
25	2.695	1960.17	1852.17	1.85217	18	2.931	1274	1158	1.158
26	3.08	2102.08	1994.08	1.99408	19	2.717	2374.28	2258.28	2.25828
27	4.321	3224.87	3116.87	3.11687	20	5.07	1491.93	1375.93	1.37593
28	3.487	2925.56	2817.56	2.81756	21	3.701	1325.57	1209.57	1.20957
29	3.252	2661.67	2553.67	2.55367	22	4.3	2793.52	2677.52	2.67752
30	3.102	2147.87	2039.87	2.03987	23	4	2316.17	2200.17	2.20017
31	2.973	2123.58	2015.58	2.01558	24	3.53	1980.44	1864.44	1.86444
32	3.016	2415.3	2307.3	2.3073	25	3.273	1707.82	1591.82	1.59182
33	2.289	2069.49	1961.49	1.96149	26	2.374	2014.8	1898.8	1.8988
34	2.246	3372.07	3264.07	3.26407	27	2.866	2701.55	2585.55	2.58555
35	3.53	1866.5	1758.5	1.7585	28	3.572	1909.6	1793.6	1.7936
36	3.679	3429.94	3321.94	3.32194	29	3.957	1630.92	1514.92	1.51492
37	4.706	3622.62	3514.62	3.51462	30	4.214	830.99	714.99	0.71499
38	4.834	3237.27	3129.27	3.12927	31	5.54	1880.1	1764.1	1.7641
39	2.931	3389.69	3281.69	3.28169	32	3.465	2916.1	2800.1	2.8001
40	3.615	2561.14	2453.14	2.45314	33	2.225	3481.36	3365.36	3.36536
41	2.824	2569.75	2461.75	2.46175	34	6.781	1693.97	1577.97	1.57797
42	2.717	3275.02	3167.02	3.16702	35	3.722	1715.21	1599.21	1.59921
43	4.171	2172.52	2064.52	2.06452	36	3.487	3054.49	2938.49	2.93849
44	5.155	1884.63	1776.63	1.77663	37	2.631	2831.82	2715.82	2.71582
45	4.642	2522.97	2414.97	2.41497	38	4.899	1301.23	1185.23	1.18523
46	1.647	2195.77	2087.77	2.08777	39	4	1360.83	1244.83	1.24483
47	2.952	1060.13	952.13	0.95213	40	3.872	1465.97	1349.97	1.34997
48	3.722	833.81	725.81	0.72581	41	3.594	1409.11	1293.11	1.29311
49	4.556	3214.07	3106.07	3.10607	42	3.53	1257.76	1141.76	1.14176
50	2.653	1557.23	1449.23	1.44923	43	2.203	527.301	411.301	0.411301
51	2.674	2139.51	2031.51	2.03151	44	3.829	1237.45	1121.45	1.12145
52	2.524	3381.97	3273.97	3.27398	45	2.203	876.184	760.184	0.760184
53	1.861	2059.61	1951.61	1.95161	46	3.401	1795.3	1679.3	1.6793
54	4.514	1305.38	1197.38	1.19738	47	3.615	750.976	634.976	0.634976
55	3.979	3649.58	3541.58	3.54158
56	3.487	3381.91	3273.91	3.27391

## Sheet: TseV3 exp1
TseV3 Glucose			mean bac-mean background	mean bac-mean back/1000	TseV3 Arabinose			mean bac-mean back	mean bac-mean back/1000
Field 1	Area	Mean			Field 1	Area	Mean
1	2.614	80.1			1	3.15	80.4
2	1.729	2468.72	2388.72	2.38872	1	1.898	585.478	505.478	0.505478
3	6.958	2596.86	2516.86	2.51686	2	1.497	81.521	1.521	0.001521
4	2.678	2263.39	2183.39	2.18339	3	1.919	524.549	444.549	0.444549
5	2.066	1776.77	1696.77	1.69677	4	1.539	582.068	502.068	0.502068
6	1.56	853.635	773.635	0.773635	5	2.931	2616.31	2536.31	2.53631
7	1.56	3150.74	3070.74	3.07074	6	1.94	1610.9	1530.9	1.5309
8	2.319	3269.45	3189.45	3.18945	7	2.825	481.731	401.731	0.401731
9	1.982	1962.29	1882.29	1.88229	8	1.813	1178.13	1098.13	1.09813
10	2.087	3272.47	3192.47	3.19247	9	5.187	2147.04	2067.04	2.06704
11	2.846	2137.05	2057.05	2.05705	10	2.172	1742.84	1662.84	1.66284
12	2.404	2255.99	2175.99	2.17599	11	1.539	1273.19	1193.19	1.19319
13	2.741	3816.91	3736.91	3.73691	12	3.605	169.251	89.251	0.089251
14	2.087	4011.37	3931.37	3.93137	13	2.129	440.554	360.554	0.360554
15	2.614	3234.11	3154.11	3.15411	14	1.898	438	358	0.358
16	2.151	3082.36	3002.36	3.00236	15	1.729	2266.72	2186.72	2.18672
17	2.172	1923.15	1843.15	1.84315	16	2.741	829.115	749.115	0.749115
18	3.057	3158.44	3078.44	3.07844	17	2.657	998.619	918.619	0.918619
19	1.56	1760.18	1680.18	1.68018	18	1.75	1813.51	1733.51	1.73351
20	3.331	286.753	206.753	0.206753	19	2.298	1606.32	1526.32	1.52632
21	1.476	228.429	148.429	0.148429	20	2.003	2301.77	2221.77	2.22177
22	1.961	854.376	774.376	0.774376	21	2.045	2860.23	2780.23	2.78023
23	1.476	1113.51	1033.51	1.03351	22	2.846	886.081	806.081	0.806081
24	2.867	1676.84	1596.84	1.59684	23	3.142	1800.72	1720.72	1.72072
25	2.994	1691.11	1611.11	1.61111	24	2.277	1038.62	958.62	0.95862
26	4.196	2552.24	2472.24	2.47224	25	2.256	1459.12	1379.12	1.37912
27	3.268	3016.84	2936.84	2.93684	26	1.687	439.488	359.488	0.359488
28	2.867	1145.04	1065.04	1.06504	27	2.488	848.186	768.186	0.768186
29	3.184	640.728	560.728	0.560728	28	2.045	1770.55	1690.55	1.69055
30	1.898	3408.51	3328.51	3.32851	29	2.151	1698.85	1618.85	1.61885
31	1.855	3391.36	3311.36	3.31136	30	2.762	1878.12	1798.12	1.79811
32	2.298	3036.19	2956.19	2.95619	31	4.132	335.842	255.842	0.255842
33	2.825	3205.05	3125.05	3.12505	32	2.298	929.266	849.266	0.849266
34	1.834	3539.99	3459.99	3.45999	33	4.259	1786.99	1706.99	1.70699
35	1.666	3518.77	3438.77	3.43877	34	3.626	1266.49	1186.49	1.18649
36	1.729	3597.68	3517.68	3.51768	35	2.825	1472.72	1392.72	1.39272
37	1.602	1920.13	1840.13	1.84013	36	2.129	1703.4	1623.4	1.6234
38	2.846	991.704	911.704	0.911704	37	4.132	1756.17	1676.17	1.67617
39	2.509	1576.31	1496.31	1.49631	38	1.961	2292.93	2212.93	2.21293
40	1.202	784.737	704.737	0.704737	39	3.943	1135.01	1055.01	1.05501
41	0.949	1557.56	1477.56	1.47756	40	3.458	2314.52	2234.52	2.23452
42	1.602	1828.33	1748.33	1.74833	41	2.277	374.944	294.944	0.294944
43	3.521	1630.38	1550.38	1.55038	42	2.361	927.027	847.027	0.847027
44	3.057	2963.86	2883.86	2.88386	43	1.94	2615.6	2535.6	2.5356
45	2.404	2184.02	2104.02	2.10402	44	1.602	213.053	133.053	0.133053
46	2.256	3065.47	2985.47	2.98547	45	2.024	2120.69	2040.69	2.04069
47	2.446	3336.45	3256.45	3.25645	46	2.172	2329.38	2249.38	2.24938
48	2.614	3492.57	3412.57	3.41257	47	3.5	657.349	577.349	0.577349
49	1.94	1009.6	929.598	0.929598	48	1.855	1736.15	1656.15	1.65615
50	2.404	668.202	588.202	0.588202	49	1.708	136.728	56.728	0.056728
51	1.518	2213.57	2133.57	2.13357	50	4.175	1095.63	1015.63	1.01563
					51	2.404	1234.37	1154.37
Field 2
1	7.358	105.605			Field 2
2	3.184	1506.23	1400.63	1.40063	1	7.696	82.847
3	1.708	694.741	589.141	0.589141	2	2.277	1710.92	1628.12	1.62812
4	3.247	1191.98	1086.38	1.08638	3	2.425	1712.06	1629.26	1.62926
5	1.94	1391.22	1285.62	1.28562	4	1.898	1171.33	1088.53	1.08853
6	1.666	1775.57	1669.97	1.66997	5	2.699	848.297	765.497	0.765497
7	2.129	1288.61	1183.01	1.18301	6	1.16	1043.44	960.636	0.960636
8	3.331	3263.44	3157.84	3.15784	7	1.75	1176.1	1093.3	1.0933
9	2.53	2893.72	2788.12	2.78812	8	3.226	1719.52	1636.72	1.63672
10	2.551	1769.84	1664.24	1.66424	9	1.876	1892.56	1809.76	1.80976
11	1.16	3362.73	3257.13	3.25713	10	2.024	1769.81	1687.01	1.68701
12	1.455	3012.83	2907.23	2.90723	11	3.142	917.275	834.475	0.834475
13	3.205	1767.57	1661.97	1.66197	12	3.395	867.224	784.424	0.784424
14	2.952	1250.23	1144.63	1.14463	13	2.678	1580.43	1497.63	1.49763
15	2.952	1362.19	1256.59	1.25659	14	1.708	1804.61	1721.81	1.72181
16	2.235	2793.19	2687.59	2.68759	15	2.087	159.596	76.796	0.076796
17	2.129	1264.01	1158.41	1.15841	16	2.277	2507.13	2424.33	2.42433
18	2.129	361.861	256.261	0.256261	17	3.142	864.96	782.16	0.78216
19	2.277	1960.47	1854.87	1.85487	18	3.226	1089.87	1007.07	1.00707
20	1.982	2045.51	1939.91	1.93991	19	2.045	1306.66	1223.86	1.22386
21	2.91	1546.2	1440.6	1.4406	20	1.771	1623	1540.2	1.5402
22	3.563	2610.31	2504.71	2.50471	21	2.172	2379.73	2296.93	2.29693
23	2.91	3207.8	3102.2	3.1022	22	2.846	1953.27	1870.47	1.87047
24	3.015	3058.64	2953.04	2.95304	23	1.729	2460.88	2378.08	2.37808
25	4.849	1115.54	1009.94	1.00994	24	2.657	891	808.2	0.8082
26	2.404	1311.51	1205.91	1.20591	25	1.834	484.483	401.683	0.401683
27	2.277	2894.74	2789.14	2.78914	26	2.087	319.434	236.634	0.236634
28	2.319	3074.64	2969.05	2.96904	27	2.151	911.676	828.876	0.828876
29	2.129	1991.93	1886.33	1.88633	28	2.34	603.207	520.407	0.520407
30	2.382	585.097	479.497	0.479497	29	1.581	761.013	678.213	0.678213
31	2.846	1591.44	1485.84	1.48584	30	1.602	474.816	392.016	0.392016
32	2.319	1459.5	1353.9	1.3539	31	3.373	1455.26	1372.46	1.37246
33	1.645	630.282	524.682	0.524682	32	2.467	1501.74	1418.94	1.41894
34	2.087	1819.84	1714.24	1.71424	33	3.416	696.506	613.706	0.613706
35	1.56	1464.38	1358.78	1.35878	34	1.919	1968.7	1885.9	1.8859
36	2.256	1562.88	1457.28	1.45728	35	3.479	928.558	845.758	0.845758
37	3.12	1608.37	1502.77	1.50277	36	3.247	403.792	320.992	0.320992
38	3.057	2699.99	2594.39	2.59439	37	3.395	1573.51	1490.71	1.49071
39	2.867	2611.96	2506.36	2.50636	38	2.783	622.447	539.647	0.539647
40	2.614	1607.98	1502.38	1.50238	39	3.142	858.591	775.791	0.775791
41	1.497	2833.37	2727.77	2.72777	40	2.509	798.655	715.855	0.715855
42	2.614	1621.54	1515.94	1.51594	41	2.045	1836.15	1753.36	1.75335
43	1.919	1940.01	1834.41	1.83441	42	2.319	227.245	144.445	0.144445
44	2.34	2837.41	2731.81	2.73181	43	2.741	1109.72	1026.92	1.02692
45	2.277	2134.52	2028.92	2.02892	44	2.804	1547.87	1465.07	1.46507
46	4.617	795.785	690.185	0.690185	45	3.964	1741.51	1658.71	1.65871
47	3.458	1963.4	1857.8	1.8578	46	3.226	1868.39	1785.59	1.78559
48	2.404	2825.4	2719.8	2.7198	47	2.551	769.934	687.134	0.687134
49	3.205	2784.37	2678.77	2.67877	48	3.542	231.202	148.402	0.148402
50	3.057	2152.71	2047.11	2.04711	49	1.729	2009.13	1926.33	1.92633
51	2.214	2768.47	2662.87	2.66287	50	3.605	855.333	772.533	0.772533
					51	2.509	1741.36	1658.56	1.65856
Field 3
1	7.843	103.868			Field 3
2	2.973	2384.83	2281.03	2.28103	1	24.12	91.858
3	1.539	1349.55	1245.75	1.24575	2	2.404	1643.43	1551.63	1.55163
4	3.163	1263.71	1159.91	1.15991	3	1.202	157	65.2	0.0652
5	2.867	2858.44	2754.64	2.75464	4	2.277	1511.32	1419.52	1.41952
6	2.277	1089.78	985.978	0.985978	5	3.163	2395.67	2303.87	2.30387
7	2.003	1010.15	906.347	0.906347	6	2.382	2197.49	2105.69	2.10569
8	3.669	1148.19	1044.39	1.04439	7	3.078	851.336	759.536	0.759536
9	3.205	2674.45	2570.65	2.57065	8	3.205	1719.41	1627.61	1.62761
10	2.825	1411.06	1307.26	1.30726	9	4.976	703.39	611.59	0.61159
11	2.889	1262.01	1158.21	1.15821	10	3.099	1969.77	1877.97	1.87797
12	3.331	1363.65	1259.85	1.25985	11	2.214	802.257	710.457	0.710457
13	2.172	2237.96	2134.16	2.13416	12	2.382	1883.52	1791.72	1.79172
14	3.057	1728.78	1624.98	1.62498	13	2.172	1984.94	1893.14	1.89314
15	3.458	2403.46	2299.66	2.29966	14	2.003	2167.58	2075.78	2.07578
16	4.66	364.163	260.363	0.260363	15	2.867	1011.71	919.906	0.919906
17	2.446	2992.76	2888.96	2.88896	16	1.771	1013	921.2	0.9212
18	3.226	994.34	890.54	0.89054	17	4.217	1719.34	1627.54	1.62754
19	4.027	2586.81	2483.01	2.48301	18	4.154	737.305	645.505	0.645505
20	2.087	2890.6	2786.8	2.7868	19	2.256	2125.77	2033.97	2.03397
21	2.867	1713.12	1609.32	1.60932	20	2.825	1172.72	1080.92	1.08092
22	2.72	2890.81	2787.01	2.78701	21	3.12	1926.38	1834.59	1.83459
23	2.678	912.811	809.011	0.809011	22	1.876	2063.64	1971.84	1.97184
24	3.289	2547.82	2444.02	2.44402	23	2.635	969.776	877.976	0.877976
25	2.361	193.732	89.932	0.089932	24	2.509	1804.74	1712.94	1.71294
26	2.045	1769.2	1665.4	1.6654	25	2.108	1739.61	1647.81	1.64781
27	2.804	2764.17	2660.37	2.66037	26	2.657	1028.98	937.176	0.937176
28	2.256	2904.89	2801.09	2.80109	27	2.657	293.81	202.01	0.20201
29	1.961	1236.6	1132.8	1.1328	28	3.521	1253.1	1161.3	1.1613
30	1.771	2772	2668.2	2.6682	29	2.298	1208.84	1117.04	1.11704
31	2.361	2523.07	2419.27	2.41927	30	2.024	843.698	751.898	0.751898
32	2.34	1208.43	1104.63	1.10463	31	3.605	785.784	693.984	0.693984
33	1.834	3104.52	3000.72	3.00072	32	3.015	1291.13	1199.33	1.19933
34	1.919	753.846	650.046	0.650046	33	2.108	1834.37	1742.57	1.74257
35	7.169	1132.25	1028.45	1.02845	34	2.53	2033.91	1942.11	1.94211
36	3.837	2620.25	2516.45	2.51645	35	1.687	375.325	283.525	0.283525
37	3.099	2905.95	2802.15	2.80215	36	2.256	171.393	79.593	0.079593
38	3.352	2832.39	2728.59	2.72859	37	4.28	1031.46	939.658	0.939658
39	3.057	1215.59	1111.79	1.11179	38	1.729	677.707	585.907	0.585907
40	1.328	1496.78	1392.98	1.39298	39	5.819	654.71	562.91	0.56291
41	2.151	1037.4	933.602	0.933602	40	3.015	1344.68	1252.88	1.25289
42	2.066	2162.74	2058.94	2.05894	41	4.385	1407.68	1315.88	1.31588
43	2.657	1665.36	1561.56	1.56156	42	2.72	380.155	288.355	0.288355
44	2.551	1195.16	1091.36	1.09136	43	2.172	1602.35	1510.55	1.51055
45	2.699	2945.86	2842.06	2.84206	44	2.024	2578.48	2486.68	2.48668
46	2.741	2428.31	2324.51	2.32451	45	2.235	1124.05	1032.25	1.03225
47	4.491	2530.64	2426.84	2.42684	46	3.922	1504.31	1412.51	1.41251
48	1.855	2133.47	2029.67	2.02967	47	2.404	185.868	94.068	0.094068
49	2.34	2505.31	2401.51	2.40151	48	3.373	730.456	638.656	0.638656
50	1.919	3310.53	3206.73	3.20673	49	2.361	1165.93	1074.13	1.07413
51	2.446	2946.72	2842.92	2.84292	50	2.825	636.157	544.357	0.544357
					51	2.825	888.343	796.543	0.796543
Field 4
1	16.867	111.639			Field 4
2	2.994	1226.69	1115.09	1.11509	1	16.867	104.156
3	2.593	2778.72	2667.12	2.66712	2	3.563	1347.22	1243.12	1.24312
4	3.416	1196.32	1084.72	1.08472	3	3.816	1478.15	1374.06	1.37406
5	2.193	2606.93	2495.33	2.49533	4	2.994	1454.06	1349.96	1.34996
6	2.34	1837.04	1725.44	1.72544	5	2.762	785.595	681.495	0.681495
7	2.741	1362.85	1251.25	1.25125	6	1.602	1259.43	1155.33	1.15533
8	2.804	2933.34	2821.74	2.82174	7	2.003	1868.11	1764.01	1.76401
9	7.316	773.052	661.452	0.661452	8	2.635	2001.02	1896.92	1.89692
10	2.657	1035.67	924.067	0.924067	9	1.982	2377.2	2273.1	2.2731
11	2.593	2707.89	2596.29	2.59629	10	4.533	992.465	888.365	0.888365
12	2.657	1460.14	1348.54	1.34854	11	3.669	554.362	450.262	0.450262
13	1.94	3370.85	3259.25	3.25925	12	2.151	1896.56	1792.46	1.79246
14	3.964	1082.78	971.177	0.971177	13	1.623	673.688	569.588	0.569588
15	3.626	3231.26	3119.66	3.11966	14	1.328	763.492	659.392	0.659392
16	3.373	2598.99	2487.39	2.48739	15	1.286	1106.8	1002.7	1.0027
17	2.298	2399.38	2287.78	2.28778	16	1.56	1549.12	1445.02	1.44502
18	2.277	2620.78	2509.18	2.50918	17	2.551	1654.82	1550.72	1.55072
19	1.602	170.132	58.532	0.058532	18	2.446	1713.88	1609.78	1.60978
20	2.172	1286.03	1174.43	1.17443	19	2.91	2036.76	1932.66	1.93266
21	1.834	1108.25	996.653	0.996653	20	2.024	883.385	779.285	0.779285
22	3.753	1362.8	1251.2	1.2512	21	2.108	1059.34	955.24	0.95524
23	2.446	2439.57	2327.97	2.32797	22	2.045	1914.57	1810.47	1.81047
24	2.973	2944.65	2833.05	2.83305	23	1.771	723.202	619.102	0.619102
25	2.193	2519.75	2408.15	2.40815	24	2.53	1128.65	1024.55	1.02455
26	1.813	488.674	377.074	0.377074	25	2.108	1278.99	1174.89	1.17489
27	1.982	947.021	835.421	0.835421	26	2.003	635.232	531.132	0.531132
28	1.982	1079.8	968.198	0.968198	27	1.096	501.115	397.015	0.397015
29	2.066	1371.77	1260.17	1.26017	28	3.563	1822.81	1718.71	1.71871
30	1.434	2767.34	2655.74	2.65574	29	1.623	1425.82	1321.72	1.32172
31	1.708	1440.47	1328.87	1.32887	30	2.235	623.462	519.362	0.519362
32	3.563	199.568	87.968	0.087968	31	1.497	398.535	294.435	0.294435
33	2.129	2748.02	2636.42	2.63642	32	2.446	1625.05	1520.95	1.52095
34	2.72	2234.19	2122.59	2.12259	33	1.666	1073.05	968.951	0.968951
35	4.28	836.148	724.548	0.724548	34	2.952	492.65	388.55	0.38855
36	1.792	1157.19	1045.59	1.04559	35	2.172	1790.02	1685.92	1.68592
37	1.919	3081.49	2969.89	2.9699	36	2.193	488.404	384.304	0.384304
38	1.771	2506.83	2395.23	2.39523	37	1.876	728.404	624.304	0.624304
39	4.343	3140.54	3028.94	3.02894	38	2.657	983.23	879.13	0.87913
40	2.34	3599.17	3487.57	3.48757	39	2.572	1254.13	1150.03	1.15003
41	2.699	3564.38	3452.78	3.45277	40	2.889	2962.26	2858.16	2.85816
42	3.247	2707.32	2595.72	2.59572	41	3.142	1110.48	1006.38	1.00638
43	1.771	2949.8	2838.2	2.8382	42	0.696	217.242	113.142	0.113142
44	1.729	2455.55	2343.95	2.34395	43	1.223	379.034	274.934	0.274934
45	6.388	3263.27	3151.67	3.15167	44	2.256	1102.79	998.685	0.998685
46	5.292	1315.12	1203.52	1.20352	45	2.572	1750.63	1646.53	1.64653
47	1.813	1167.11	1055.51	1.05551	46	2.172	509.961	405.861	0.405861
48	2.551	1385.68	1274.08	1.27408	47	2.678	461.213	357.113	0.357113
49	5.819	1145.84	1034.24	1.03424	48	3.015	747.182	643.082	0.643082
50	3.057	1283.29	1171.69	1.17169	49	1.855	690.898	586.798	0.586798
51	3.142	2678.57	2566.97	2.56697	50	3.563	874.858	770.758	0.770758
					51	2.699	553.062	448.962	0.448962

## Sheet: TseV3 exp2
TseV3 Glucose					TseV3 Arabinose
Field 1			mean bac-mean background	mean bac-mean back/1000	Field 1			mean bac-mean back	mean bac-mean back/1000
	Area	Mean				Area	Mean
1	5.884	54.869			1	11.224	44.77
2	2.742	2565.74	2511.74	2.51174	2	2.029	1773.39	1729.39	1.72939
3	4.525	950.69	896.69	0.89669	3	3.787	1789	1745	1.745
4	3.625	2150.52	2096.52	2.09652	4	2.87	1745.1	1701.1	1.7011
5	2.853	2285.12	2231.12	2.23112	5	2.258	2321.94	2277.94	2.27794
6	2.505	3033.09	2979.09	2.97909	6	3.235	1199.98	1155.98	1.15598
7	3.405	2673.66	2619.66	2.61966	7	5.366	1265.84	1221.84	1.22184
8	1.35	3639.64	3585.64	3.58564	8	2.607	2244.01	2200.01	2.20001
9	2.946	1186.53	1132.53	1.13253	9	3.371	2033.15	1989.15	1.98915
10	3.328	1096.13	1042.13	1.04213	10	1.944	1446.73	1402.73	1.40273
11	6.308	1131.47	1077.47	1.07747	11	3.761	1038.27	994.269	0.994269
12	2.87	1083.26	1029.26	1.02926	12	2.938	864.517	820.517	0.820517
13	3.778	803.236	749.236	0.749236	13	1.469	2308.88	2264.88	2.26488
14	2.963	1226.34	1172.34	1.17234	14	3.566	1683.3	1639.3	1.6393
15	5.026	1069.67	1015.67	1.01567	15	3.294	1494.13	1450.13	1.45013
16	3.736	1445.42	1391.42	1.39142	16	2.793	906.161	862.161	0.862161
17	4.916	1164.62	1110.62	1.11062	17	2.369	2102.04	2058.04	2.05804
18	4.602	1020.73	966.734	0.966734	18	3.294	936.856	892.856	0.892856
19	4.483	1426.04	1372.04	1.37204	19	3.481	2066.84	2022.84	2.02284
20	4.389	1286.03	1232.03	1.23203	20	2.624	1615.2	1571.2	1.5712
21	2.267	1281.3	1227.3	1.2273	21	3.065	1273.01	1229.01	1.22901
22	3.303	950.566	896.566	0.896566	22	2.556	1584.07	1540.07	1.54007
23	3.073	2407.74	2353.74	2.35374	23	3.6	1172.56	1128.56	1.12856
24	2.751	1190.37	1136.37	1.13637	24	3.965	1261.04	1217.04	1.21704
25	2.989	964.045	910.045	0.910045	25	4.738	1558.4	1514.4	1.5144
26	4.415	1190.38	1136.38	1.13637	26	4.092	1651.32	1607.32	1.60732
27	2.241	3157.51	3103.51	3.10351	27	3.43	2004.74	1960.74	1.96074
28	3.405	1149.55	1095.55	1.09555
29	2.301	1893.27	1839.27	1.83927	Field 2
30	3.26	2259.19	2205.19	2.20519	1	4.22	47.026
31	4.364	905.381	851.381	0.851381	2	3.956	1095.23	1048.23	1.04823
32	3.014	602.958	548.958	0.548958	3	2.938	1135.13	1088.13	1.08813
33	4.313	1020.4	966.4	0.9664	4	1.724	1990.97	1943.97	1.94397
34	4.109	1495.64	1441.64	1.44165	5	2.564	1776.71	1729.71	1.72971
35	2.292	2157.87	2103.87	2.10387	6	3.023	1570.13	1523.13	1.52313
36	2.309	1285.69	1231.69	1.23169	7	3.481	2928.61	2881.61	2.88161
37	2.853	1862.07	1808.07	1.80807	8	5.306	2896.74	2849.74	2.84974
					9	1.842	985.544	938.544	0.938544
Field 2					10	1.562	1761.53	1714.53	1.71453
1	8.516	51.772			11	3.668	944.086	897.086	0.897086
2	2.488	2203.02	2152.02	2.15202	12	4.423	2778.12	2731.12	2.73112
3	3.158	1324.93	1273.93	1.27393	13	5.689	1973.79	1926.79	1.92679
4	3.158	912.513	861.513	0.861513	14	2.819	2310.04	2263.04	2.26304
5	4.576	1683.81	1632.81	1.63281	15	4.568	1792.76	1745.76	1.74576
6	3.43	2458.15	2407.15	2.40715	16	2.148	1119.47	1072.47	1.07247
7	4.05	2652.83	2601.83	2.60183	17	1.571	1815.22	1768.22	1.76822
8	3.294	1464.74	1413.74	1.41374	18	2.887	1603.31	1556.31	1.55631
9	2.785	1377.95	1326.95	1.32695	19	3.175	681.107	634.107	0.634107
10	2.496	2383.62	2332.62	2.33262	20	6.92	2327.69	2280.69	2.28069
11	3.065	1458.91	1407.91	1.40791	21	1.562	2290.55	2243.55	2.24355
12	2.598	1360.48	1309.48	1.30948	22	3.829	2241.04	2194.04	2.19404
13	3.889	3495.77	3444.77	3.44477	23	2.632	2064.8	2017.8	2.0178
14	1.893	1188.03	1137.03	1.13703	24	3.04	1891	1844	1.844
15	1.953	1483.05	1432.05	1.43205	25	3.286	1609.53	1562.53	1.56253
16	1.766	3039.92	2988.92	2.98892	26	1.579	1817.55	1770.55	1.77055
17	6.886	1362.78	1311.78	1.31178	27	2.734	2005.76	1958.76	1.95876
18	3.218	1527.2	1476.2	1.4762	28	3.252	645.144	598.144	0.598144
19	3.235	1871.57	1820.57	1.82057
20	2.394	931.78	880.78	0.88078	Field 3
21	3.676	2039.2	1988.2	1.9882	1	10.231	125.08
22	4.237	1258.92	1207.92	1.20792	2	6.189	1421.63	1296.63	1.29663
23	1.953	3050.25	2999.25	2.99925	3	4.126	945.922	820.922	0.820922
24	2.233	2133.98	2082.98	2.08298	4	5.306	1172.63	1047.63	1.04763
25	2.793	996.976	945.976	0.945976	5	4.075	1980.91	1855.91	1.85591
26	2.25	1073.86	1022.86	1.02286	6	3.727	2362.18	2237.18	2.23718
27	3.107	1490.17	1439.17	1.43917	7	3.269	2299.56	2174.56	2.17456
28	3.32	1101.48	1050.48	1.05048	8	3.447	1839.79	1714.79	1.71479
29	3.006	3158.42	3107.42	3.10742	9	3.999	3039.24	2914.24	2.91424
30	2.7	974.063	923.063	0.923063	10	2.98	1785.21	1660.21	1.66021
31	2.165	2487.07	2436.07	2.43607	11	3.09	2670.16	2545.16	2.54516
32	2.182	2080.07	2029.07	2.02907	12	2.479	1628.34	1503.34	1.50334
33	2.36	2081.64	2030.64	2.03064	13	2.267	1545.43	1420.43	1.42043
34	3.158	2974.41	2923.41	2.92341	14	1.639	1609.93	1484.93	1.48493
35	2.072	1874.1	1823.1	1.8231	15	3.685	1432.34	1307.34	1.30734
36	3.54	965.811	914.811	0.914811	16	3.371	1482.92	1357.92	1.35792
37	2.233	1372.61	1321.61	1.3216	17	4.228	1470.6	1345.6	1.3456
38	2.165	2763.7	2712.7	2.7127	18	3.235	1610.77	1485.77	1.48577
39	5.612	1193.19	1142.19	1.14219	19	2.522	1084.3	959.296	0.959296
40	3.082	2437.3	2386.3	2.3863	20	3.388	1959.19	1834.19	1.83419
41	1.919	939.611	888.611	0.888611	21	2.445	1453.36	1328.36	1.32836
42	1.358	1083.5	1032.5	1.0325	22	2.844	767.713	642.713	0.642713
					23	5.222	1551.15	1426.15	1.42615
Field 3					24	5.417	1318.38	1193.38	1.19338
1	2.36	99.766			25	1.91	1274.67	1149.67	1.14967
2	2.776	2828.9	2729.9	2.7299	26	3.133	1939.26	1814.26	1.81426
3	2.972	3056.54	2957.54	2.95754	27	5.111	987.719	862.719	0.862719
4	1.027	939.215	840.215	0.840215	28	2.505	1460.2	1335.2	1.3352
5	3.116	1346.43	1247.43	1.24743	29	2.522	1347.65	1222.65	1.22265
6	2.072	1193.47	1094.47	1.09447	30	3.923	1729.46	1604.46	1.60446
7	2.318	1512.41	1413.41	1.41341	31	4.041	1549.83	1424.83	1.42483
8	3.073	2546.11	2447.11	2.44711	32	4.755	982.448	857.448	0.857448
9	2.59	1724.44	1625.44	1.62544	33	3.456	1237.6	1112.6	1.1126
10	2.42	2767.32	2668.32	2.66832	34	4.033	1602.48	1477.48	1.47748
11	1.605	2142.47	2043.47	2.04347	35	2.853	2382.56	2257.56	2.25756
12	1.741	2706.4	2607.4	2.6074	36	4.491	1905.42	1780.42	1.78042
13	2.887	849.571	750.571	0.750571	37	3.006	1791.14	1666.14	1.66614
14	3.09	2604.02	2505.02	2.50502	38	2.912	1548.82	1423.82	1.42382
15	2.36	1295.88	1196.88	1.19688	39	4.653	1853.78	1728.78	1.72878
16	3.107	1010.92	911.918	0.911918	40	3.523	2188.1	2063.1	2.0631
17	2.089	1083.74	984.736	0.984736	41	3.286	1628.5	1503.5	1.5035
18	1.579	996.828	897.828	0.897828	42	6.181	1669.85	1544.85	1.54485
19	3.702	1058.59	959.589	0.959589	43	3.668	1391.49	1266.49	1.26649
20	2.751	3233.26	3134.26	3.13426	44	5.96	1847.57	1722.57	1.72257
21	3.956	3410.4	3311.4	3.3114	45	4.806	2011.65	1886.65	1.88665
22	2.123	3394.66	3295.66	3.29566	46	2.445	1083.31	958.312	0.958312
23	1.681	1921.09	1822.09	1.82209	47	3.456	1490.86	1365.86	1.36586
24	1.639	1362.81	1263.81	1.26381	48	1.936	945.974	820.974	0.820974
25	1.69	3144.03	3045.03	3.04503	49	2.267	1087.03	962.03	0.96203
26	2.36	2961.39	2862.39	2.86239	50	3.515	1247.18	1122.18	1.12218
27	3.226	931.042	832.042	0.832042	51	3.175	1760.27	1635.27	1.63527
28	2.403	1017.55	918.555	0.918555	52	3.838	563.381	438.381	0.438381
29	2.233	2886.71	2787.71	2.78771	53	2.174	1188.34	1063.34	1.06334
30	3.269	1775.5	1676.5	1.6765	54	1.392	1100.87	975.872	0.975872
31	2.36	1050.46	951.46	0.95146	55	4.653	1105.89	980.889	0.980889
32	2.25	2440.9	2341.9	2.3419	56	4.347	1149.6	1024.6	1.0246
33	1.825	963.4	864.4	0.8644	57	4.389	1745.53	1620.53	1.62053
34	3.829	989.978	890.978	0.890978	58	2.275	998.112	873.112	0.873112
35	1.757	2346.91	2247.91	2.24791	59	3.43	1558.99	1433.99	1.43399
36	3.065	2718.36	2619.36	2.61936	60	2.607	919.384	794.384	0.794384
37	3.014	1120.01	1021.01	1.02101	61	3.761	1754.27	1629.27	1.62927
38	2.581	1289.21	1190.21	1.19021
39	2.946	963.847	864.847	0.864847	Field 4
40	2.224	1013.26	914.26	0.91426	1	6.886	56.912
41	2.004	2656.48	2557.48	2.55748	2	3.634	609.472	553.472	0.553472
42	3.141	2232.36	2133.36	2.13336	3	2.972	1644.77	1588.77	1.58877
43	2.284	1390.29	1291.29	1.29129	4	2.318	1720.13	1664.13	1.66413
44	2.844	2570.19	2471.19	2.47119	5	4.661	1609.41	1553.41	1.55341
45	1.732	1423.84	1324.84	1.32484	6	4.296	1680.1	1624.1	1.6241
46	1.452	1322.92	1223.92	1.22392	7	3.914	1338.93	1282.93	1.28293
47	1.418	1915.35	1816.35	1.81635	8	3.77	2412.81	2356.81	2.35681
48	3.583	994.957	895.957	0.895957	9	2.428	1640.47	1584.47	1.58447
49	3.506	921.864	822.864	0.822864	10	2.87	1749.97	1693.97	1.69397
50	2.123	1871.08	1772.08	1.77208	11	3.192	2196.82	2140.82	2.14082
51	2.123	1871.08	1772.08	1.77208	12	1.69	1651.3	1595.3	1.5953
52	3.057	2363.07	2264.07	2.26407	13	2.369	2392.48	2336.48	2.33648
53	2.81	1112.9	1013.9	1.0139	14	2.904	1298.25	1242.25	1.24225
54	2.021	1477.22	1378.22	1.37822	15	2.598	1399.15	1343.15	1.34315
55	1.639	1367.01	1268.01	1.26801	16	2.114	1261.78	1205.78	1.20578
56	2.607	2585.29	2486.29	2.48629	17	2.063	1704	1648	1.648
57	1.52	1832.81	1733.81	1.73381	18	6.232	1868.99	1812.99	1.81299
58	5.06	624.369	525.369	0.525369	19	3.116	1602.24	1546.24	1.54624
59	3.6	2360.1	2261.1	2.2611	20	2.836	1396.93	1340.93	1.34093
60	2.267	2585.8	2486.8	2.4868	21	5.12	423.101	367.101	0.367101
61	2.403	1967.67	1868.67	1.86867	22	4.822	1464.23	1408.23	1.40823
62	2.055	1915.14	1816.14	1.81614	23	1.673	1171.15	1115.15	1.11515
63	2.343	3146.09	3047.09	3.04709	24	1.282	1101.54	1045.54	1.04554
					25	2.776	769.59	713.59	0.71359
Field 4					26	1.8	1993.94	1937.94	1.93794
1	14.383	54.018			27	2.021	1367.16	1311.16	1.31116
2	2.326	2731.14	2677.14	2.67714	28	3.532	1956.75	1900.75	1.90075
3	1.953	1990.99	1936.99	1.93699	29	2.454	1831.95	1775.95	1.77595
4	3.099	2425.62	2371.62	2.37162	30	3.532	1171.11	1115.11	1.11511
5	2.802	1298.36	1244.36	1.24436	31	3.311	1200.94	1144.94	1.14494
6	1.69	1095.51	1041.51	1.04151	32	5.154	937.797	881.797	0.881797
7	2.887	1269.94	1215.94	1.21594	33	3.523	1972.45	1916.45	1.91645
8	2.157	1168.5	1114.5	1.1145	34	2.326	2253.8	2197.8	2.1978
9	1.859	3029.15	2975.15	2.97515	35	5.281	1946.66	1890.66	1.89066
10	4.279	1007.45	953.448	0.953448	36	2.895	1371.36	1315.36	1.31536
11	3.719	1699.53	1645.53	1.64553	37	3.727	965.182	909.182	0.909182
12	2.657	727.131	673.131	0.673131	38	6.716	1367.59	1311.59	1.31159
13	2.564	852.742	798.742	0.798742	39	4.585	1844.51	1788.51	1.78851
14	5.884	2489.25	2435.25	2.43525	40	3.107	2430.29	2374.29	2.37429
15	2.174	1688.26	1634.26	1.63426	41	4.364	1768.19	1712.19	1.71219
16	4.95	1764.69	1710.69	1.71069	42	2.352	1825.86	1769.86	1.76986
17	3.15	2037.69	1983.69	1.98369	43	3.744	714.168	658.168	0.658168
18	4.118	1987.97	1933.97	1.93397	44	2.055	584.012	528.012	0.528012
19	3.226	1289.25	1235.25	1.23525	45	1.146	2136.71	2080.71	2.08071
20	3.787	3067	3013	3.013	46	2.454	848.997	792.997	0.792997
21	2.063	3060.26	3006.26	3.00626	47	2.751	3090.73	3034.73	3.03473
22	1.622	1151.8	1097.8	1.0978	48	1.944	1953.82	1897.82	1.89782
23	3.065	1621.64	1567.64	1.56764	49	3.388	1615.55	1559.55	1.55955
24	4.593	909.055	855.055	0.855055	50	2.938	1034.89	978.89	0.97889
25	2.097	2938.77	2884.77	2.88477	51	2.785	787.668	731.668	0.731668
26	1.724	1983.52	1929.52	1.92952	52	1.919	1821.59	1765.59	1.76559
27	1.936	2813.43	2759.43	2.75943	53	8.159	665.186	609.186	0.609186
28	4.627	600.327	546.327	0.546327	54	4.05	1065.53	1009.53	1.00953
29	2.573	2328.35	2274.35	2.27435	55	3.243	2491.05	2435.05	2.43505
30	3.49	1569.27	1515.27	1.51527	56	2.649	1778.35	1722.35	1.72235
31	2.021	1646.35	1592.35	1.59235	57	4.339	2041.81	1985.81	1.98581
32	3.49	1957.66	1903.66	1.90366	58	3.634	1402.64	1346.64	1.34664
33	1.757	2224.41	2170.41	2.17041	59	3.583	1861.5	1805.5	1.8055
34	2.666	2986.26	2932.26	2.93226	60	4.729	1440.06	1384.06	1.38406
35	2.08	2321.51	2267.51	2.26751	61	2.42	1514.75	1458.75	1.45875
36	2.411	2991.13	2937.13	2.93713	62	4.491	964.147	908.147	0.908147
37	2.106	2235.99	2181.99	2.18199	63	3.515	962.193	906.193	0.906193
38	1.494	974.92	920.92	0.92092	64	2.36	1617.55	1561.55	1.56155
39	4.466	2183.3	2129.3	2.12929	65	2.768	1984.11	1928.11	1.92811
40	5.23	1188.99	1134.99	1.13499	66	2.717	1735.78	1679.78	1.67978
41	3.634	2480.73	2426.73	2.42673	67	2.556	1530.31	1474.31	1.47431
42	2.335	1316.98	1262.98	1.26298	68	2.836	1747.59	1691.59	1.69159
43	3.846	1116.87	1062.87	1.06287	69	1.639	2243.04	2187.04	2.18704
44	3.073	1914.97	1860.97	1.86097	70	4.092	493.643	437.643	0.437643
45	3.829	2689.66	2635.66	2.63566	71	5.289	1278.73	1222.73	1.22273
46	3.141	1085.07	1031.07	1.03107
47	3.099	1932.82	1878.82	1.87882
48	3.94	2766.28	2712.28	2.71228
49	2.887	806.109	752.109	0.752109
50	2.624	2013.08	1959.08	1.95908
51	2.36	885.932	831.932	0.831932
52	2.284	958.907	904.907	0.904907
53	3.54	748.201	694.201	0.694201
54	2.471	738.144	684.144	0.684144
55	1.783	2227.79	2173.79	2.17379
56	1.783	2225.09	2171.09	2.17109
57	3.506	890.872	836.872	0.836872
58	1.528	1283.61	1229.61	1.22961
59	5.06	1171.48	1117.48	1.11748

## Sheet: TseV3 exp3
TseV3 Glucose					TseV3 Arabinose
Field 1			mean bac-mean background	mean bac-mean back/1000	Field 1			mean bac-mean back	mean bac-mean back/1000
	Area	Mean				Area	Mean
1	5.739	48.001			1	5.952	48.275
2	3.26	833.125	785.125	0.785125	2	7.404	529.403	481.403	0.481403
3	2.394	2730.55	2682.55	2.68255	3	3.328	1048.06	1000.06	1.00006
4	2.437	2215.06	2167.06	2.16706	4	6.971	1118.09	1070.09	1.07009
5	1.825	1702.07	1654.07	1.65407	5	5.816	2192.99	2144.99	2.14499
6	1.978	2084.17	2036.17	2.03617	6	2.666	957.666	909.666	0.909666
7	2.471	1197.78	1149.78	1.14978	7	6.283	1349.5	1301.5	1.3015
8	1.562	2509.33	2461.33	2.46133	8	2.861	2823.34	2775.34	2.77534
9	3.88	2014.15	1966.15	1.96615	9	3.073	2961.3	2913.3	2.9133
10	6.071	1794.12	1746.12	1.74612	10	2.972	1169.1	1121.1	1.1211
11	3.422	1544.9	1496.9	1.4969	11	6.911	550.166	502.166	0.502166
12	4.449	2371.68	2323.68	2.32368	12	2.708	1166.11	1118.11	1.11811
13	3.906	2414.04	2366.04	2.36604	13	1.995	1263.17	1215.17	1.21517
14	2.785	898.686	850.686	0.850686	14	2.989	1232.4	1184.4	1.1844
15	3.651	2663.78	2615.78	2.61578	15	3.761	500.67	452.67	0.45267
16	3.048	1401.97	1353.97	1.35397	16	3.43	676.725	628.725	0.628725
17	4.245	2642.66	2594.66	2.59466	17	3.422	468.591	420.591	0.420591
18	4.89	1927.69	1879.69	1.87969	18	2.759	682.505	634.505	0.634505
19	3.6	2674.67	2626.67	2.62667	19	2.046	1376.58	1328.58	1.32858
20	3.727	2565.69	2517.69	2.51769	20	2.326	1170.83	1122.83	1.12283
21	3.821	2621.08	2573.08	2.57308	21	6.291	1285.14	1237.14	1.23714
22	2.734	2750.33	2702.33	2.70233	22	1.469	1574.69	1526.69	1.52669
23	2.343	818.366	770.366	0.770366	23	3.141	973.197	925.197	0.925197
24	3.693	2672.78	2624.78	2.62478	24	2.428	940.587	892.587	0.892587
25	3.252	2243.35	2195.35	2.19535	25	3.099	680.301	632.301	0.632301
26	3.099	1481.01	1433.01	1.43301	26	2.887	1330.19	1282.19	1.28219
27	4.738	1230.73	1182.73	1.18273	27	2.335	744.535	696.535	0.696535
28	2.785	2083.13	2035.13	2.03513	28	4.143	1062.21	1014.21	1.01421
29	2.938	1708.08	1660.08	1.66007	29	4.568	967.859	919.859	0.919859
30	2.827	2175.55	2127.55	2.12755	30	2.326	1550.58	1502.58	1.50258
31	2.98	2430.48	2382.48	2.38248	31	1.834	266.468	218.468	0.218468
32	2.895	1524.36	1476.36	1.47636	32	4.491	389.333	341.333	0.341333
33	6.232	2377.63	2329.63	2.32963	33	4.551	888.078	840.078	0.840078
34	3.209	1255	1207	1.207	34	3.719	497.767	449.767	0.449767
35	2.573	2532.11	2484.11	2.48411	35	3.354	524.565	476.565	0.476565
36	3.608	1139.47	1091.47	1.09147	36	3.719	735.717	687.717	0.687717
37	4.288	1831.42	1783.42	1.78342	37	3.311	1091.32	1043.32	1.04331
38	2.674	2164.72	2116.72	2.11672	38	3.557	1813.7	1765.7	1.7657
39	2.14	2123.92	2075.92	2.07592	39	2.997	320.122	272.122	0.272122
40	2.428	1782.32	1734.32	1.73432	40	1.868	1770.56	1722.56	1.72256
41	2.98	1953.48	1905.48	1.90548	41	2.607	1097.84	1049.84	1.04984
42	3.94	1907.22	1859.22	1.85922
43	1.808	1437.74	1389.74	1.38974	Field 2
44	3.065	1790.8	1742.8	1.7428	1	12.294	43.727
45	3.405	1765.85	1717.85	1.71785	2	2.369	1108.95	1065.95	1.06595
46	2.411	1988.35	1940.35	1.94034	3	3.09	248.008	205.008	0.205008
47	2.836	1806.34	1758.34	1.75834	4	1.214	2814.23	2771.23	2.77123
48	2.513	1011.85	963.845	0.963845	5	2.751	1538.18	1495.18	1.49518
49	2.547	770.123	722.123	0.722123	6	2.768	2287.17	2244.17	2.24417
50	3.897	1080.2	1032.2	1.0322	7	1.248	914.408	871.408	0.871408
					8	1.571	1428.71	1385.71	1.38571
Field 2					9	3.897	1184.94	1141.94	1.14194
1	7.404	53.232			10	5.629	2634.88	2591.88	2.59188
2	2.267	1377	1324	1.324	11	3.43	1830.06	1787.06	1.78706
3	2.734	2214.92	2161.92	2.16192	12	4.041	2116.45	2073.45	2.07345
4	3.184	2087.98	2034.98	2.03498	13	2.802	431.812	388.812	0.388812
5	3.625	1870.51	1817.51	1.81751	14	6.3	2997.08	2954.08	2.95408
6	2.615	1964.86	1911.86	1.91186	15	3.116	1094.84	1051.84	1.05184
7	3.303	1327.92	1274.92	1.27492	16	3.532	1619.62	1576.62	1.57662
8	2.454	1690.78	1637.78	1.63777	17	1.316	2510.17	2467.17	2.46717
9	4.033	1525.68	1472.68	1.47268	18	5.332	1496.19	1453.19	1.45319
10	1.919	1423.35	1370.35	1.37035	19	3.651	556.563	513.563	0.513563
11	2.547	1657.16	1604.16	1.60416	20	2.708	634.245	591.245	0.591245
12	1.927	1219.99	1166.99	1.16699	21	3.736	2351.77	2308.77	2.30877
13	2.632	1604.33	1551.33	1.55133	22	2.666	238.697	195.697	0.195697
14	3.243	1866.01	1813.01	1.81301	23	2.454	1125.2	1082.2	1.0822
15	1.757	2585.39	2532.39	2.53239	24	2.972	1495.39	1452.39	1.45239
16	3.88	1591.58	1538.58	1.53858	25	2.615	1081.96	1038.96	1.03896
17	3.523	1505.42	1452.42	1.45242	26	2.445	1265.66	1222.66	1.22266
18	1.791	1308.67	1255.67	1.25567	27	2.029	1242.05	1199.05	1.19905
19	1.656	1617.15	1564.15	1.56415	28	1.698	1398.63	1355.63	1.35563
20	2.717	1718.84	1665.84	1.66584	29	2.165	1546.29	1503.29	1.50329
21	2.386	2403.1	2350.1	2.3501	30	1.206	1994.75	1951.75	1.95175
22	3.583	1312.37	1259.37	1.25937	31	1.876	1018.82	975.824	0.975824
23	2.7	2370.37	2317.37	2.31737	32	3.931	245.715	202.715	0.202715
24	1.673	1403.8	1350.8	1.3508	33	2.488	1560.43	1517.43	1.51743
25	2.547	1458.29	1405.29	1.40529	34	2.488	2103.8	2060.8	2.0608
26	2.581	1805.8	1752.8	1.7528	35	3.608	2616.08	2573.08	2.57308
27	2.581	2248.41	2195.41	2.19541	36	2.199	1599.83	1556.83	1.55683
28	2.326	2740.15	2687.15	2.68715	37	2.19	555.167	512.167	0.512167
29	3.32	1780.56	1727.56	1.72756	38	2.437	552.857	509.857	0.509857
30	1.707	1222.06	1169.06	1.16905	39	2.411	1660.36	1617.36	1.61736
31	2.861	1241.65	1188.65	1.18865	40	2.836	1394.28	1351.28	1.35128
32	4.237	1776.47	1723.47	1.72347	41	3.065	1269.69	1226.69	1.22669
33	2.318	1279.93	1226.93	1.22693	42	1.155	912.456	869.456	0.869456
34	2.284	1882.74	1829.74	1.82974	43	3.082	1817.85	1774.85	1.77485
35	2.53	2006.47	1953.47	1.95347	44	2.004	1894.23	1851.23	1.85123
36	3.184	2001.24	1948.24	1.94824	45	2.666	1824.89	1781.89	1.7819
37	3.999	1688.94	1635.94	1.63594	46	1.545	1105.53	1062.53	1.06253
38	1.825	2233.34	2180.34	2.18034	47	2.106	1012.94	969.944	0.969944
39	2.343	1938.97	1885.97	1.88597	48	2.174	544.125	501.125	0.501125
					49	3.345	1272.15	1229.15	1.22915
Field 3					50	2.64	980.489	937.489	0.937489
1	4.364	69.329			51	3.192	372.891	329.891	0.329891
2	2.42	1691.76	1622.76	1.62276
3	3.447	2679.26	2610.26	2.61026	Field 3
4	2.394	2600.47	2531.47	2.53147	1	5.349	48.497
5	2.98	1951.57	1882.57	1.88257	2	2.887	2410.27	2362.27	2.36227
6	7.446	1355.92	1286.92	1.28692	3	3.625	1244.24	1196.24	1.19624
7	4.517	1791.09	1722.09	1.72209	4	1.995	1216.21	1168.21	1.16821
8	2.157	2750.78	2681.78	2.68178	5	7.174	1959.49	1911.49	1.91149
9	2.539	1343.53	1274.53	1.27453	6	3.107	1060.83	1012.83	1.01283
10	2.505	1537.93	1468.93	1.46893	7	4.772	1917.63	1869.63	1.86963
11	2.581	1960.17	1891.17	1.89117	8	7.293	2480.28	2432.28	2.43228
12	3.201	1516.39	1447.39	1.44739	9	3.354	1349.81	1301.81	1.30181
13	1.885	1545.01	1476.01	1.47601	10	3.591	1882.36	1834.36	1.83436
14	3.855	1232.92	1163.92	1.16392	11	1.299	1213.41	1165.41	1.16541
15	3.897	2568.13	2499.13	2.49913	12	1.63	1270.53	1222.53	1.22253
16	3.379	2834.65	2765.65	2.76565	13	3.082	1882.04	1834.04	1.83404
17	2.887	2552.02	2483.02	2.48302	14	1.987	544.402	496.402	0.496402
18	2.157	2447.89	2378.89	2.37889	15	2.352	1722.3	1674.3	1.6743
19	1.63	1628.69	1559.69	1.55969	16	1.944	1269.48	1221.48	1.22148
20	2.844	2443.56	2374.56	2.37456	17	2.326	1530.26	1482.26	1.48226
21	2.106	1738.09	1669.09	1.66909	18	2.878	1347.88	1299.88	1.29988
22	1.859	1988.04	1919.04	1.91904	19	2.131	1582.37	1534.37	1.53437
23	1.953	2493.03	2424.03	2.42403	20	1.774	2098.93	2050.93	2.05093
24	2.793	2110.63	2041.63	2.04163	21	2.182	1582.28	1534.28	1.53428
25	3.778	1802.3	1733.3	1.7333	22	4.058	388.843	340.843	0.340843
26	1.741	1414.44	1345.44	1.34544	23	2.844	312.242	264.242	0.264242
27	3.354	1562.25	1493.25	1.49325	24	1.681	1529.76	1481.76	1.48176
28	1.724	2294.61	2225.61	2.22561	25	3.642	292.333	244.333	0.244333
29	2.997	2430.08	2361.08	2.36108	26	3.422	1386.43	1338.43	1.33843
30	1.418	2066.72	1997.72	1.99772	27	2.479	1715.81	1667.81	1.66781
31	2.683	1271.47	1202.47	1.20247	28	2.08	1887.58	1839.58	1.83958
32	3.719	2072.39	2003.39	2.00339	29	2.674	2671.15	2623.15	2.62315
33	4.585	2499.39	2430.39	2.43039	30	1.494	1232.26	1184.26	1.18426
34	2.657	1516.63	1447.63	1.44763	31	3.252	2139.47	2091.47	2.09147
35	1.265	847.04	778.04	0.77804	32	1.24	1814.07	1766.07	1.76607
36	7.115	1399.33	1330.33	1.33033	33	2.343	1033.08	985.08	0.98508
37	1.868	1753.17	1684.17	1.68417	34	2.989	1471.69	1423.69	1.42369
38	2.674	1523.4	1454.4	1.4544	35	3.201	2354.48	2306.48	2.30648
39	3.294	1882.46	1813.46	1.81346	36	2.573	980.693	932.693	0.932693
40	2.207	1162.04	1093.04	1.09304	37	6.69	567.694	519.694	0.519694
41	1.588	1095.85	1026.85	1.02685	38	3.54	2275.78	2227.78	2.22778
42	2.301	448.819	379.819	0.379819	39	2.674	869.238	821.238	0.821238
43	2.445	2556.44	2487.44	2.48744	40	1.8	1583.22	1535.22	1.53522
44	1.494	1973.55	1904.55	1.90455	41	2.853	934.491	886.491	0.886491
45	2.148	2354.99	2285.99	2.28599	42	3.439	2159.71	2111.71	2.11171
46	2.624	1223.98	1154.98	1.15498	43	2.929	255.629	207.629	0.207629
47	5.001	1434.71	1365.71	1.36571	44	4.483	1285.95	1237.95	1.23795
48	1.605	1604.98	1535.98	1.53598	45	1.834	1641.85	1593.85	1.59385
49	1.774	1987.6	1918.6	1.9186	46	2.522	1004.33	956.327	0.956327
					47	3.167	1310.62	1262.62	1.26263
Field 4
1	5.298	66.316			Field 4
2	3.753	1614.36	1548.36	1.54836	1	3.116	51.676
3	1.274	1283.11	1217.11	1.21711	2	6.945	2141.01	2090.01	2.09001
4	2.411	1193.32	1127.32	1.12732	3	2.403	1389.27	1338.27	1.33827
5	2.19	1099.8	1033.8	1.0338	4	3.388	623.356	572.356	0.572356
6	2.335	1135.13	1069.13	1.06913	5	2.063	2757.76	2706.76	2.70676
7	4.339	2481.95	2415.95	2.41595	6	3.031	854.305	803.305	0.803305
8	4.61	1767.55	1701.55	1.70155	7	3.311	1500.36	1449.36	1.44936
9	3.04	1302.97	1236.97	1.23697	8	4.05	406.857	355.857	0.355857
10	1.214	1432.35	1366.35	1.36635	9	1.927	1970.98	1919.98	1.91998
11	2.632	3170.68	3104.68	3.10468	10	2.369	2034.45	1983.45	1.98345
12	2.819	2564.93	2498.93	2.49893	11	2.556	1986.21	1935.21	1.93521
13	2.148	1654.25	1588.25	1.58825	12	2.335	2236.33	2185.33	2.18533
14	2.581	1409.67	1343.67	1.34367	13	4.169	611.847	560.847	0.560847
15	2.895	2253.13	2187.13	2.18713	14	1.715	1540.81	1489.81	1.48981
16	2.556	2119.95	2053.95	2.05395	15	3.141	1329.67	1278.67	1.27867
17	2.055	1309.73	1243.73	1.24373	16	3.014	1187.06	1136.06	1.13606
18	1.537	1961.55	1895.55	1.89555	17	5.638	864.622	813.622	0.813622
19	3.761	1895.77	1829.77	1.82977	18	2.454	1783.09	1732.09	1.73209
20	2.632	1772.39	1706.39	1.70639	19	3.804	1655.14	1604.14	1.60414
21	3.54	1792.09	1726.09	1.72609	20	3.379	879.103	828.103	0.828103
22	2.106	2532.47	2466.47	2.46647	21	1.375	1146.89	1095.89	1.0959
23	1.681	1538.83	1472.83	1.47283	22	2.632	2142.1	2091.1	2.0911
24	3.26	949.576	883.576	0.883576	23	2.64	874.232	823.232	0.823232
25	2.42	2013.92	1947.92	1.94792	24	1.571	674.405	623.405	0.623405
26	1.707	1550.7	1484.7	1.4847	25	2.615	821.24	770.24	0.77024
27	2.063	1110.82	1044.82	1.04482	26	2.097	308.117	257.117	0.257117
28	1.944	1070.31	1004.31	1.00431	27	2.284	1535.3	1484.3	1.4843
29	3.116	1320.58	1254.58	1.25458	28	3.566	1418.27	1367.27	1.36727
30	3.897	1389.72	1323.72	1.32372	29	3.625	1518.59	1467.59	1.46759
31	3.659	1580.68	1514.68	1.51468	30	2.097	1966.4	1915.4	1.9154
32	4.415	2107.76	2041.76	2.04176	31	2.785	1237.14	1186.14	1.18614
33	2.81	1987.95	1921.95	1.92195	32	6.003	1331.87	1280.87	1.28087
34	2.046	2122.81	2056.81	2.05681	33	2.471	1312.94	1261.94	1.26194
35	3.175	1863.81	1797.81	1.79781	34	3.744	1269.51	1218.51	1.21851
36	2.216	2099.46	2033.46	2.03346	35	3.023	1007	956	0.956
37	1.724	1267.85	1201.85	1.20185	36	5.417	1533.34	1482.34	1.48234
38	4.924	1462.92	1396.92	1.39692	37	2.564	1060.28	1009.28	1.00928
39	3.396	2685.14	2619.14	2.61914	38	3.515	745.126	694.126	0.694126
40	3.49	2066.24	2000.24	2.00024	39	2.861	1345.01	1294.01	1.29401
41	3.693	1585.75	1519.75	1.51975	40	5.527	505.243	454.243	0.454243
42	2.224	1963.85	1897.85	1.89785	41	2.207	774.058	723.058	0.723058
43	1.817	1551.8	1485.8	1.4858	42	2.454	1390.93	1339.93	1.33993
44	4.041	1626.93	1560.93	1.56093	43	3.642	677.944	626.944	0.626944
45	3.685	2062.86	1996.86	1.99686	44	3.031	483.07	432.07	0.43207
46	2.377	1159.88	1093.88	1.09388	45	2.938	494.766	443.766	0.443766
					46	3.872	1032.93	981.934	0.981934
					47	3.294	1296.53	1245.53	1.24553
					48	2.258	1167.32	1116.32	1.11632
					49	2.029	1525.79	1474.79	1.47479
					50	2.972	1502.65	1451.65	1.45165
					51	3.685	982.62	931.62	0.93162
