# Supplementary material for: Antibacterial T6SS effectors with a VRR-Nuc domain are structure-specific nucleases
Source: eLife journal article supplement (doi:10.7554/elife.82437), 2022-10-13
Supplement: fig4-data3 [file GamGFP foci source data.xlsx]

## Sheet: TseV2
	exp1					exp1					exp1					exp1
	TseV2 glucose					TseV2 IPTG					TseV2 D282A glucose					TseV2 D282A IPTG
	Foci		cell total			Foci		cell total			Foci		cell total			Foci		cell total
	field1					field1					field 1					field 1
	3		100			111		121			0		100			2		107
	field2					field2					field2					field2
	3		100			69		83			3		100			1		105
	field3					field3					field3					field3
	4		100			116		129			0		111			3		108
	field4					field4					field4					field4
	6		100			77		89			3		122			1		107
Total	16		400		Total	373		422		Total	6		433		Total	7		427
Percentage	4	4			Percentage	88.3886	88.3886			Percentage	1.38568	1.38568			Percentage	1.63934	1.63934
	total without foci:	96				total without foci:	11.6114				total without foci:	98.6143				total without foci:	98.3607
	exp2					exp2					exp2					exp2
	TseV2 glucose					TseV2 IPTG					TseV2 D282A glucose					TseV2 D282A IPTG
	Foci		cell total			Foci		cell total			Foci		cell total			Foci		cell total
	field1					field1					field1					field1
	9		100			88		104			3		107			6		105
	field2					field2					field2					field2
	6		100			94		100			0		106			3		110
	field3					field3					field3					field3
	7		100			79		112			3		104			8		109
	field4					field4					field4					field4
	8		100			81		100			0		112			4		115
Total	30		400		Total	342		416		Total	6		429		Total	21		439
Percentage	7.5	7.5			Percentage	82.2115	82.2115			Percentage	1.3986	1.3986			Percentage	4.7836	4.7836
	total without foci:	92.5				total without foci:	17.7885				total without foci:	98.6014				total without foci:	95.2164
	exp3					exp3					exp3					exp3
	TseV2 glucose					TseV2 IPTG					TseV2 D282A glucose					TseV2 D282A IPTG
	Foci		cell total			Foci		cell total			Foci		cell total			Foci		cell total
	field 1					field1					field1					field1
	5		104			95		118			0		101			2		100
	field2					field2					field2					field2
	6		101			74		84			1		107			3		108
	field3					field3					field3					field3
	5		110			79		101			2		111			6		123
	field4					field4					field4					field4
	6		101			89		102			0		110			4		100
Total	22		416		Total	337		405		Total	3		429		Total	15		431
Percentage	5.28846	5.28846			Percentage	83.2099	83.2099			Percentage	0.699301	0.699301			Percentage	3.48028	3.48028
	total without foci:	94.7115				total without foci:	16.7901				total without foci:	99.3007				total without foci:	96.5197
	Foci			No Foci
TseV2 Glucose	4	7.5	5.28846	96	92.5	94.7115
TseV2 IPTG	88.3886	82.2115	83.2099	11.6114	17.7885	16.7901
TseV2 D282A glucose	1.38568	1.3986	0.699301	98.6143	98.6014	99.3007
TseV D282A IPTG	1.63934	4.7836	3.48028	98.3607	95.2164	96.5197

## Sheet: TseV3
	exp1					exp1					exp1					exp1
	TseV3 glucose					TseV3 IPTG					TseV3 D230A glucose					TseV3 D230A IPTG
	Foci		cell total			Foci		cell total			Foci		cell total			Foci		cell total
	field1					field1					field 1					field 1
	3		100			108		192			2		108			4		108
	field2					field2					field2					field2
	0		100			71		125			0		103			3		115
	field3					field3					field3					field3
	0		100			43		79			0		121			2		104
	field4					field4					field4					field4
	1		100			64		137			1		100			1		104
Total	4		400		Total	286		533		Total	3		432		Total	10		431
Percentage	1	1			Percentage	53.6585	53.6585			Percentage	0.694444	0.694444			Percentage	2.32019	2.32019
	total sem foci:	99				total without foci:	46.3415				total without foci:	99.3056				total without foci:	97.6798
	exp2					exp2					exp2					exp2
	TseV3 glucose					TseV3 IPTG					TseV3 D230A glucose					TseV3 D230A IPTG
	Foci		cell total			Foci		cell total			Foci		cell total			Foci		cell total
	field1					field1					field1					field1
	1		100			80		100			0		101			2		110
	field2					field2					field2					field2
	3		100			88		113			3		106			0		101
	field3					field3					field3					field3
	0		100			85		108			3		111			4		105
	field4					field4					field4					field4
	1		105			75		106			0		108			2		122
Total	5		405		Total	328		427		Total	6		426		Total	8		438
Percentage	1.23457	1.23457			Percentage	76.815	76.815			Percentage	1.40845	1.40845			Percentage	1.82648	1.82648
	total without foci:	98.7654				total without foci:	23.185				total without foci:	98.5915				total without foci:	98.1735
	exp3					exp3					exp3					exp3
	TseV3 glucose					TseV3 IPTG					TseV3 D230A glucose					TseV3 D230A IPTG
	Foci		cell total			Foci		cell total			Foci		cell total			Foci		cell total
	field1					field1					field1					field1
	2		101			86		110			2		103			5		104
	field2					field2					field2					field2
	3		100			64		100			2		101			3		103
	field3					field3					field3					field3
	3		107			79		112			1		105			3		100
	field4					field4					field4					field4
	3		104			76		106			3		122			0		107
Total	11		412		Total	305		428		Total	8		431		Total	11		414
Percentage	2.6699	2.6699			Percentage	71.2617	71.2617			Percentage	1.85615	1.85615			Percentage	2.657	2.657
	total without foci:	97.3301				total without foci:	28.7383				total without foci:	98.1439				total without foci:	97.343
	Foci			No Foci
TseV3 Glucose	1	1.23457	2.6699	99	98.7654	97.3301
TseV3 IPTG	53.6585	76.815	71.2617	46.3415	23.185	28.7383
TseV3 D230A glucose	0.694444	1.40845	1.85615	99.3056	98.5915	98.1439
TseV D230A IPTG	2.32019	1.82648	2.657	97.6798	98.1735	97.343

## Sheet: empty plasmid
	exp1					exp1
	empty glucose					empty IPTG
	Foci		cell total			Foci		cell total
	field1					field1
	1		100			2		100
	field2					field2
	2		100			2		100
	field3					field3
	1		100			1		100
	field4					field4
	1		100			1		100
Total	5		400		Total	6		400
Percentage	1.25	1.25			Percentage	1.5	1.5
	total without foci:	98.75				total without foci:	98.5
	exp2					exp2
	empty glucose					empty IPTG
	Foci		cell total			Foci		cell total
	field1					field1
	1		105			3		104
	field2					field2
	2		100			2		100
	field3					field3
	0		100			1		102
	field4					field4
	2		102			1		121
Total	5		407		Total	7		427
Percentage	1.2285	1.2285			Percentage	1.63934	1.63934
	total without foci:	98.7715				total without foci:	98.3607
	exp3					exp3
	empty glucose					empty IPTG
	Foci		cell total			Foci		cell total
	field1					field1
	0		100			0		100
	field2					field2
	2		100			2		100
	field3					field3
	1		100			3		100
	field4					field4
	2		100			4		100
Total	5		400		Total	9		400
Percentage	1.25	1.25			Percentage	2.25	2.25
	total without foci:	98.75				total without foci:	97.75
	Foci			No Foci
empty Glucose	1.25	1.2285	1.25	98.75	98.7715	98.75
empty IPTG	1.5	1.63934	2.25	98.5	98.3607	97.75
