# Supplementary material for: Antibacterial T6SS effectors with a VRR-Nuc domain are structure-specific nucleases
Source: eLife journal article supplement (doi:10.7554/elife.82437), 2022-10-13
Supplement: fig6-figsupp1-data1 [file SEC-MALS data.xlsx]

## Sheet: Exp1
SEC-MALS TseV3-TsiV3 Exp2	time (min)	TseV3-TsiV3 (dRI)	time (min)	TseV3-TsiV3( Molar mass)
	-0.325959	-1.42091	28.0719	60712.3
	-0.310169	-0.506587	28.0888	62798
	-0.29438	0.00209065	28.1056	63105.2
	-0.27859	0.0030186	28.1224	63437.9
	-0.262801	0.00359804	28.1393	63641.7
	-0.247011	0.00401885	28.1561	63392
	-0.231221	0.00433458	28.1729	63344.2
	-0.215432	0.00457197	28.1898	63397.5
	-0.199642	0.00476377	28.2066	63446.5
	-0.183853	0.00492762	28.2234	63498.4
	-0.168063	0.00505856	28.2403	63441.2
	-0.152274	0.00516322	28.2571	63433.5
	-0.136484	0.00525657	28.2739	63449.3
	-0.120694	0.00534079	28.2908	63462.4
	-0.104905	0.00540142	28.3076	63443.1
	-0.0891151	0.0054583	28.3244	63492.3
	-0.0733255	0.00551439	28.3413	63523.6
	-0.0575359	0.0055672	28.3581	63746.9
	-0.0417463	0.00561162	28.3749	63909.9
	-0.0259567	0.00564349	28.3918	63892.3
	-0.0101671	0.00567361	28.4086	64035.3
	0.00562245	0.00568848	28.4254	64069.8
	0.021412	0.005697	28.4423	64060.2
	0.0372016	0.00570128	28.4591	64027.1
	0.0529912	0.00570966	28.4759	64090.2
	0.0687808	0.00571062	28.4928	64153.2
	0.0845704	0.00572805	28.5096	64162.8
	0.10036	0.00574524	28.5265	64213.3
	0.11615	0.00575167	28.5433	64240.2
	0.131939	0.00578209	28.5601	64357.8
	0.147729	0.00582136	28.577	64524.6
	0.163518	0.00585785	28.5938	64614.2
	0.179308	0.00586423	28.6106	64640.1
	0.195098	0.00586025	28.6275	64553.5
	0.210887	0.00583242	28.6443	64470.6
	0.226677	0.00580459	28.6611	64436.4
	0.242466	0.00572949	28.678	64466.8
	0.258256	0.00566602	28.6948	64524.4
	0.274046	0.00562129	28.7116	64415.7
	0.289835	0.00559094	28.7285	64330.3
	0.305625	0.00558256	28.7453	64210.4
	0.321414	0.00557418	28.7621	63943.3
	0.337204	0.00556216	28.779	63891.3
	0.352994	0.00551129	28.7958	63801.5
	0.368783	0.0054306	28.8126	63768.2
	0.384573	0.00533222	28.8295	63762.7
	0.400362	0.00523299	28.8463	63612.6
	0.416152	0.00515484	28.8631	63518
	0.431942	0.00511578	28.88	63536
	0.447731	0.00513682	28.8968	63241.8
	0.463521	0.00517324	28.9136	63165.6
	0.47931	0.00521072	28.9305	63084.8
	0.4951	0.00520763	28.9473	62875.1
	0.51089	0.00518977	28.9641	62743.9
	0.526679	0.00517191	28.981	62520.7
	0.542469	0.00497489	28.9978	62401.2
	0.558258	0.00412991	29.0147	62414.5
	0.574048	0.00203831	29.0315	62134.5
	0.589838	-0.00287758	29.0483	62075
	0.605627	-0.0105084	29.0652	61967.5
	0.621417	-0.0197585	29.082	61825.2
	0.637206	-0.0286123	29.0988	61899.2
	0.652996	-0.0346585	29.1157	61796.9
	0.668786	-0.0371897	29.1325	61652.9
	0.684575	-0.0367008	31.2368	40497.7
	0.700365	-0.0340588	31.2536	40025
	0.716154	-0.0300981	31.2705	39844.7
	0.731944	-0.0257679	31.2873	39498.8
	0.747733	-0.0215237	31.3042	39170.6
	0.763523	-0.0176564	31.321	39294
	0.779313	-0.0145175	31.3378	39943.4
	0.795102	-0.0122288	31.3547	40441.7
	0.810892	-0.0102259	31.3715	41487.6
	0.826681	-0.00837447	31.3883	42627.7
	0.842471	-0.0068336	31.4052	43669.9
	0.858261	-0.00554285	31.422	43527.1
	0.87405	-0.00446567	31.4388	42264.2
	0.88984	-0.00356173	31.4557	40954.4
	0.905629	-0.00280761	31.4725	40189.6
	0.921419	-0.0022526	31.4893	39882.1
	0.937209	-0.00191608	31.5062	39948.8
	0.952998	-0.00185078	31.523	40268
	0.968788	-0.00182751	31.5398	40671.9
	0.984577	-0.00194117	31.5567	41663.5
	1.00037	-0.00205484	31.5735	42244.6
	1.01616	-0.00238749	31.5903	42394.3
	1.03195	-0.0027129	31.6072	42088.9
	1.04774	-0.00298885	31.624	41762
	1.06353	-0.00321821	31.6408	41408.8
	1.07932	-0.0033819	31.6577	40780.1
	1.0951	-0.00347997	31.6745	40532.3
	1.11089	-0.00352778	31.6913	40497.6
	1.12668	-0.00349824	31.7082	40545.4
	1.14247	-0.00339138	31.725	40071.1
	1.15826	-0.00324024	31.7419	39766.8
	1.17405	-0.00303952	31.7587	39677.1
	1.18984	-0.0027952	31.7755	41544.6
	1.20563	-0.00253311	31.7924	42969
	1.22142	-0.00226638	31.8092	43752.6
	1.23721	-0.00202086	31.826	43267.1
	1.253	-0.0017642
	1.26879	-0.00149532
	1.28458	-0.00123591
	1.30037	-0.000971232
	1.31616	-0.000722095
	1.33195	-0.000502138
	1.34774	-0.000273124
	1.36353	-7.45128e-05
	1.37932	0.000102293
	1.39511	0.00031502
	1.4109	0.000502405
	1.42669	0.000647032
	1.44248	0.000794716
	1.45827	0.000960639
	1.47405	0.00109592
	1.48984	0.00119939
	1.50563	0.00129214
	1.52142	0.00137229
	1.53721	0.00145071
	1.553	0.00151522
	1.56879	0.00156422
	1.58458	0.00163821
	1.60037	0.00171758
	1.61616	0.0017763
	1.63195	0.00181397
	1.64774	0.00183426
	1.66353	0.00185309
	1.67932	0.0018892
	1.69511	0.00191534
	1.7109	0.00199498
	1.72669	0.00198913
	1.74248	0.00198011
	1.75827	0.00197109
	1.77406	0.00196122
	1.78985	0.00193782
	1.80564	0.00191442
	1.82143	0.0019064
	1.83722	0.00189839
	1.85301	0.00187962
	1.86879	0.00185937
	1.88458	0.00187942
	1.90037	0.00187304
	1.91616	0.00186561
	1.93195	0.00185818
	1.94774	0.00184114
	1.96353	0.00177911
	1.97932	0.00179209
	1.99511	0.00179353
	2.0109	0.00179497
	2.02669	0.00181259
	2.04248	0.00180756
	2.05827	0.0018009
	2.07406	0.00179203
	2.08985	0.00178316
	2.10564	0.00177207
	2.12143	0.00175188
	2.13722	0.00175636
	2.15301	0.00176233
	2.1688	0.00175424
	2.18459	0.00174615
	2.20038	0.00173049
	2.21617	0.00170486
	2.23196	0.00169883
	2.24775	0.0016874
	2.26353	0.00167597
	2.27932	0.00165462
	2.29511	0.00164742
	2.3109	0.00163716
	2.32669	0.0016269
	2.34248	0.00161224
	2.35827	0.00159213
	2.37406	0.00157996
	2.38985	0.00156936
	2.40564	0.00154525
	2.42143	0.0015214
	2.43722	0.00153592
	2.45301	0.00152616
	2.4688	0.00151639
	2.48459	0.00150031
	2.50038	0.00148566
	2.51617	0.00147586
	2.53196	0.00145639
	2.54775	0.00143223
	2.56354	0.0014378
	2.57933	0.00147023
	2.59512	0.00146396
	2.61091	0.00145768
	2.6267	0.00145482
	2.64249	0.00144748
	2.65827	0.00144051
	2.67406	0.00143118
	2.68985	0.00142186
	2.70564	0.00142198
	2.72143	0.00143267
	2.73722	0.00142865
	2.75301	0.00142075
	2.7688	0.00141285
	2.78459	0.00140338
	2.80038	0.00139777
	2.81617	0.00139096
	2.83196	0.00138415
	2.84775	0.00138643
	2.86354	0.00139419
	2.87933	0.00139094
	2.89512	0.00138998
	2.91091	0.0013845
	2.9267	0.00137063
	2.94249	0.00135677
	2.95828	0.00133815
	2.97407	0.00133734
	2.98986	0.00134954
	3.00565	0.00138162
	3.02144	0.0013814
	3.03722	0.00137606
	3.05301	0.00137071
	3.0688	0.00136411
	3.08459	0.00136464
	3.10038	0.00136105
	3.11617	0.00135745
	3.13196	0.00137656
	3.14775	0.00140677
	3.16354	0.00140087
	3.17933	0.00139229
	3.19512	0.0013837
	3.21091	0.00137962
	3.2267	0.00138017
	3.24249	0.00137435
	3.25828	0.00136852
	3.27407	0.0013834
	3.28986	0.00138957
	3.30565	0.00138574
	3.32144	0.00137791
	3.33723	0.00137009
	3.35302	0.00136082
	3.36881	0.00136036
	3.3846	0.00135345
	3.40039	0.00134617
	3.41618	0.00136685
	3.43196	0.00136285
	3.44775	0.00135471
	3.46354	0.00134657
	3.47933	0.0013355
	3.49512	0.00132443
	3.51091	0.00130896
	3.5267	0.00128502
	3.54249	0.00127804
	3.55828	0.00130838
	3.57407	0.001311
	3.58986	0.00130698
	3.60565	0.00129532
	3.62144	0.00128365
	3.63723	0.00128898
	3.65302	0.00128209
	3.66881	0.0012744
	3.6846	0.00126671
	3.70039	0.00127773
	3.71618	0.00126984
	3.73197	0.00126195
	3.74776	0.00125321
	3.76355	0.00123865
	3.77934	0.00122339
	3.79513	0.0012086
	3.81092	0.00118672
	3.8267	0.00116956
	3.84249	0.00117389
	3.85828	0.00117217
	3.87407	0.00116293
	3.88986	0.0011537
	3.90565	0.00113698
	3.92144	0.00110784
	3.93723	0.00108577
	3.95302	0.00107304
	3.96881	0.00107845
	3.9846	0.00107829
	4.00039	0.00107141
	4.01618	0.00106406
	4.03197	0.00104966
	4.04776	0.00103526
	4.06355	0.00102371
	4.07934	0.00101951
	4.09513	0.00101313
	4.11092	0.00100951
	4.12671	0.00102335
	4.1425	0.00101671
	4.15829	0.00100899
	4.17408	0.00100126
	4.18987	0.00101262
	4.20566	0.00103585
	4.22144	0.00103271
	4.23723	0.00102956
	4.25302	0.00104077
	4.26881	0.00106899
	4.2846	0.00107469
	4.30039	0.00106923
	4.31618	0.00106987
	4.33197	0.00107441
	4.34776	0.00109022
	4.36355	0.0010836
	4.37934	0.00107697
	4.39513	0.00109357
	4.41092	0.00110554
	4.42671	0.00110717
	4.4425	0.00109996
	4.45829	0.00109125
	4.47408	0.00108254
	4.48987	0.00105838
	4.50566	0.00104404
	4.52145	0.00103223
	4.53724	0.00103537
	4.55303	0.00103946
	4.56882	0.00103715
	4.58461	0.00102313
	4.6004	0.00100911
	4.61618	0.00100824
	4.63197	0.0010035
	4.64776	0.000994934
	4.66355	0.000986366
	4.67934	0.00100069
	4.69513	0.0010177
	4.71092	0.00100895
	4.72671	0.00100019
	4.7425	0.000989475
	4.75829	0.000966544
	4.77408	0.00094677
	4.78987	0.000936447
	4.80566	0.000951607
	4.82145	0.000984461
	4.83724	0.000987657
	4.85303	0.000975752
	4.86882	0.000963846
	4.88461	0.000908727
	4.9004	0.000888138
	4.91619	0.000873649
	4.93198	0.000836979
	4.94777	0.000812738
	4.96356	0.000802987
	4.97935	0.000793235
	4.99513	0.000778823
	5.01092	0.000760641
	5.02671	0.000724202
	5.0425	0.00070242
	5.05829	0.000699477
	5.07408	0.000696534
	5.08987	0.000705245
	5.10566	0.000740175
	5.12145	0.000741886
	5.13724	0.000737327
	5.15303	0.000732767
	5.16882	0.000728274
	5.18461	0.000732475
	5.2004	0.000728743
	5.21619	0.000727114
	5.23198	0.000736893
	5.24777	0.000767202
	5.26356	0.000759218
	5.27935	0.000751233
	5.29514	0.000739545
	5.31093	0.000732864
	5.32672	0.000725802
	5.34251	0.000716526
	5.3583	0.00070725
	5.37409	0.000720054
	5.38987	0.000725824
	5.40566	0.000719732
	5.42145	0.000701941
	5.43724	0.000684151
	5.45303	0.000672044
	5.46882	0.000645356
	5.48461	0.000628965
	5.5004	0.000629255
	5.51619	0.000631354
	5.53198	0.000638482
	5.54777	0.000626849
	5.56356	0.000615217
	5.57935	0.00059918
	5.59514	0.000589541
	5.61093	0.000572017
	5.62672	0.000554493
	5.64251	0.000533252
	5.6583	0.000557398
	5.67409	0.000548664
	5.68988	0.000539931
	5.70567	0.000525376
	5.72146	0.000508677
	5.73725	0.000492186
	5.75304	0.000479396
	5.76883	0.000460995
	5.78461	0.000456118
	5.8004	0.000468758
	5.81619	0.000461725
	5.83198	0.000450724
	5.84777	0.000439722
	5.86356	0.000408199
	5.87935	0.000398068
	5.89514	0.000386619
	5.91093	0.000359448
	5.92672	0.000344195
	5.94251	0.000365283
	5.9583	0.000354705
	5.97409	0.000344127
	5.98988	0.000328378
	6.00567	0.000300211
	6.02146	0.000276547
	6.03725	0.000261763
	6.05304	0.000238723
	6.06883	0.000233138
	6.08462	0.000257726
	6.10041	0.000254183
	6.1162	0.000247765
	6.13199	0.000234003
	6.14778	0.00022024
	6.16357	0.000212355
	6.17935	0.000204469
	6.19514	0.000190161
	6.21093	0.000195395
	6.22672	0.000204933
	6.24251	0.000204602
	6.2583	0.000196192
	6.27409	0.000187782
	6.28988	0.000170506
	6.30567	0.00016276
	6.32146	0.000155014
	6.33725	0.000141174
	6.35304	0.000150315
	6.36883	0.00016485
	6.38462	0.000166891
	6.40041	0.000159667
	6.4162	0.000151143
	6.43199	0.000142619
	6.44778	0.000129962
	6.46357	0.000106169
	6.47936	8.66587e-05
	6.49515	0.000110725
	6.51094	0.000131323
	6.52673	0.000129418
	6.54252	0.000120914
	6.5583	0.000112411
	6.57409	0.000102711
	6.58988	0.000103245
	6.60567	9.87577e-05
	6.62146	9.42705e-05
	6.63725	0.000110165
	6.65304	0.000117394
	6.66883	0.00011647
	6.68462	0.000111798
	6.70041	0.000104952
	6.7162	8.762e-05
	6.73199	7.02882e-05
	6.74778	4.62064e-05
	6.76357	5.38274e-05
	6.77936	9.81691e-05
	6.79515	0.000104832
	6.81094	9.76145e-05
	6.82673	8.84225e-05
	6.84252	7.92306e-05
	6.85831	6.61936e-05
	6.8741	4.17688e-05
	6.88989	2.04317e-05
	6.90568	2.56374e-05
	6.92147	7.09274e-05
	6.93726	7.32695e-05
	6.95304	6.53775e-05
	6.96883	5.74855e-05
	6.98462	4.81968e-05
	7.00041	4.00411e-05
	7.0162	3.18853e-05
	7.03199	2.81339e-05
	7.04778	2.32e-05
	7.06357	3.57878e-05
	7.07936	3.86245e-05
	7.09515	3.01583e-05
	7.11094	2.1692e-05
	7.12673	1.01661e-06
	7.14252	-8.20337e-06
	7.15831	-1.74233e-05
	7.1741	-3.69818e-05
	7.18989	-4.83007e-05
	7.20568	-2.47677e-05
	7.22147	-2.83571e-05
	7.23726	-3.55993e-05
	7.25305	-5.14005e-05
	7.26884	-6.72017e-05
	7.28463	-7.44611e-05
	7.30042	-8.5221e-05
	7.31621	-9.59808e-05
	7.332	-9.5927e-05
	7.34778	-7.03493e-05
	7.36357	-8.29537e-05
	7.37936	-9.55581e-05
	7.39515	-0.00011381
	7.41094	-0.00013678
	7.42673	-0.000143423
	7.44252	-0.000152847
	7.45831	-0.000162271
	7.4741	-0.000156725
	7.48989	-0.00014936
	7.50568	-0.000150174
	7.52147	-0.000162735
	7.53726	-0.000175296
	7.55305	-0.000186588
	7.56884	-0.000192632
	7.58463	-0.000204083
	7.60042	-0.000215535
	7.61621	-0.000216051
	7.632	-0.00018673
	7.64779	-0.000197819
	7.66358	-0.000208908
	7.67937	-0.000225399
	7.69516	-0.000250915
	7.71095	-0.000269865
	7.72674	-0.000299157
	7.74252	-0.000309426
	7.75831	-0.00027906
	7.7741	-0.000269017
	7.78989	-0.000274818
	7.80568	-0.000281778
	7.82147	-0.000293914
	7.83726	-0.00030605
	7.85305	-0.00033377
	7.86884	-0.000348463
	7.88463	-0.000354295
	7.90042	-0.000329996
	7.91621	-0.000321957
	7.932	-0.000326738
	7.94779	-0.000342192
	7.96358	-0.000357646
	7.97937	-0.000365776
	7.99516	-0.000373906
	8.01095	-0.000386436
	8.02674	-0.000388396
	8.04253	-0.00036925
	8.05832	-0.000358988
	8.07411	-0.000357735
	8.0899	-0.00036849
	8.10569	-0.000379245
	8.12148	-0.000412714
	8.13726	-0.00044187
	8.15305	-0.000450641
	8.16884	-0.000459411
	8.18463	-0.000430878
	8.20042	-0.000433517
	8.21621	-0.000441549
	8.232	-0.000449581
	8.24779	-0.000480313
	8.26358	-0.000488101
	8.27937	-0.000495889
	8.29516	-0.000510475
	8.31095	-0.000509521
	8.32674	-0.000499188
	8.34253	-0.000500617
	8.35832	-0.000514837
	8.37411	-0.000529058
	8.3899	-0.000547114
	8.40569	-0.000555752
	8.42148	-0.000564389
	8.43727	-0.000578466
	8.45306	-0.000588498
	8.46885	-0.000585808
	8.48464	-0.000589861
	8.50043	-0.000608853
	8.51621	-0.000627846
	8.532	-0.000648603
	8.54779	-0.000660058
	8.56358	-0.000671513
	8.57937	-0.000693594
	8.59516	-0.000699316
	8.61095	-0.000703386
	8.62674	-0.000710549
	8.64253	-0.000721076
	8.65832	-0.000731603
	8.67411	-0.000752105
	8.6899	-0.000780294
	8.70569	-0.000806876
	8.72148	-0.000815569
	8.73727	-0.000799481
	8.75306	-0.000799276
	8.76885	-0.000802992
	8.78464	-0.000814752
	8.80043	-0.000826513
	8.81622	-0.000838344
	8.83201	-0.00086574
	8.8478	-0.000896643
	8.86359	-0.000914449
	8.87938	-0.000881012
	8.89517	-0.00088265
	8.91095	-0.000888177
	8.92674	-0.000897938
	8.94253	-0.000907698
	8.95832	-0.000917032
	8.97411	-0.000926366
	8.9899	-0.000934522
	9.00569	-0.000936148
	9.02148	-0.000918331
	9.03727	-0.000918022
	9.05306	-0.00092535
	9.06885	-0.000943151
	9.08464	-0.000960951
	9.10043	-0.000956296
	9.11622	-0.000965146
	9.13201	-0.000973995
	9.1478	-0.000986087
	9.16359	-0.00096181
	9.17938	-0.000964498
	9.19517	-0.000971514
	9.21096	-0.000979752
	9.22675	-0.000987989
	9.24254	-0.000995679
	9.25833	-0.00100337
	9.27412	-0.00101246
	9.28991	-0.00101485
	9.30569	-0.00100333
	9.32148	-0.000999766
	9.33727	-0.0010029
	9.35306	-0.00100938
	9.36885	-0.00101586
	9.38464	-0.00101919
	9.40043	-0.001025
	9.41622	-0.00103081
	9.43201	-0.00103377
	9.4478	-0.00100274
	9.46359	-0.000994801
	9.47938	-0.000994981
	9.49517	-0.000995162
	9.51096	-0.00100062
	9.52675	-0.00100006
	9.54254	-0.00100424
	9.55833	-0.00100841
	9.57412	-0.00101339
	9.58991	-0.000985767
	9.6057	-0.000988201
	9.62149	-0.000997669
	9.63728	-0.00100714
	9.65307	-0.0010211
	9.66886	-0.0010379
	9.68465	-0.00104883
	9.70043	-0.00104884
	9.71622	-0.0010253
	9.73201	-0.000963059
	9.7478	-0.000955799
	9.76359	-0.000965029
	9.77938	-0.000974258
	9.79517	-0.000985391
	9.81096	-0.000989531
	9.82675	-0.000993672
	9.84254	-0.000999646
	9.85833	-0.000997183
	9.87412	-0.000972451
	9.88991	-0.000982346
	9.9057	-0.000992242
	9.92149	-0.00100808
	9.93728	-0.00102885
	9.95307	-0.00104428
	9.96886	-0.00105971
	9.98465	-0.00107389
	10.0004	-0.00104809
	10.0162	-0.00102092
	10.032	-0.00103419
	10.0478	-0.00104746
	10.0636	-0.00106864
	10.0794	-0.00108582
	10.0952	-0.00109435
	10.111	-0.00110289
	10.1268	-0.00111686
	10.1425	-0.00111212
	10.1583	-0.00111644
	10.1741	-0.00112409
	10.1899	-0.00113174
	10.2057	-0.0011502
	10.2215	-0.00116372
	10.2373	-0.00118339
	10.2531	-0.00121354
	10.2689	-0.0012325
	10.2846	-0.00121343
	10.3004	-0.0012226
	10.3162	-0.00123177
	10.332	-0.00124724
	10.3478	-0.00127067
	10.3636	-0.001291
	10.3794	-0.00132246
	10.3952	-0.00135328
	10.411	-0.00136791
	10.4268	-0.00133963
	10.4425	-0.00134489
	10.4583	-0.0013524
	10.4741	-0.00135991
	10.4899	-0.00138532
	10.5057	-0.00139428
	10.5215	-0.00140324
	10.5373	-0.00141882
	10.5531	-0.00144261
	10.5689	-0.0014421
	10.5847	-0.00144621
	10.6004	-0.00145998
	10.6162	-0.00147376
	10.632	-0.00149602
	10.6478	-0.00152386
	10.6636	-0.00155745
	10.6794	-0.00158014
	10.6952	-0.00156572
	10.711	-0.00155494
	10.7268	-0.00155451
	10.7425	-0.00156417
	10.7583	-0.00157383
	10.7741	-0.00160139
	10.7899	-0.001623
	10.8057	-0.0016482
	10.8215	-0.00167247
	10.8373	-0.00166954
	10.8531	-0.00163961
	10.8689	-0.00164583
	10.8847	-0.00165433
	10.9004	-0.00166284
	10.9162	-0.0016924
	10.932	-0.00171594
	10.9478	-0.00172816
	10.9636	-0.0017468
	10.9794	-0.00174018
	10.9952	-0.00170761
	11.011	-0.00171806
	11.0268	-0.00172852
	11.0426	-0.00174633
	11.0583	-0.00175403
	11.0741	-0.00176675
	11.0899	-0.00177947
	11.1057	-0.00179388
	11.1215	-0.0017705
	11.1373	-0.00175662
	11.1531	-0.00175598
	11.1689	-0.00176274
	11.1847	-0.0017699
	11.2004	-0.00177705
	11.2162	-0.00178065
	11.232	-0.00178424
	11.2478	-0.00178603
	11.2636	-0.00175872
	11.2794	-0.00175073
	11.2952	-0.00175186
	11.311	-0.00175755
	11.3268	-0.00176646
	11.3426	-0.00177536
	11.3583	-0.00179931
	11.3741	-0.00181715
	11.3899	-0.00182658
	11.4057	-0.00178942
	11.4215	-0.00173575
	11.4373	-0.00173973
	11.4531	-0.00174549
	11.4689	-0.00175125
	11.4847	-0.00174021
	11.5004	-0.00173241
	11.5162	-0.00172925
	11.532	-0.00173269
	11.5478	-0.00169964
	11.5636	-0.00165893
	11.5794	-0.00166221
	11.5952	-0.00166757
	11.611	-0.00167294
	11.6268	-0.00167775
	11.6426	-0.00168256
	11.6583	-0.00168208
	11.6741	-0.00165805
	11.6899	-0.00161649
	11.7057	-0.00159074
	11.7215	-0.0015854
	11.7373	-0.00158344
	11.7531	-0.0015794
	11.7689	-0.00155756
	11.7847	-0.00154717
	11.8005	-0.00155178
	11.8162	-0.00153749
	11.832	-0.00147298
	11.8478	-0.00143853
	11.8636	-0.00144
	11.8794	-0.00144545
	11.8952	-0.00145156
	11.911	-0.00145843
	11.9268	-0.00146529
	11.9426	-0.00144984
	11.9583	-0.00141687
	11.9741	-0.00136003
	11.9899	-0.00132483
	12.0057	-0.00133003
	12.0215	-0.00133524
	12.0373	-0.00132849
	12.0531	-0.00129474
	12.0689	-0.00127272
	12.0847	-0.00127544
	12.1005	-0.00124442
	12.1162	-0.00120451
	12.132	-0.00118503
	12.1478	-0.00117813
	12.1636	-0.00117641
	12.1794	-0.00117319
	12.1952	-0.00116523
	12.211	-0.00115874
	12.2268	-0.00116608
	12.2426	-0.00113535
	12.2583	-0.00108635
	12.2741	-0.00108017
	12.2899	-0.00106923
	12.3057	-0.00107444
	12.3215	-0.00108168
	12.3373	-0.00108892
	12.3531	-0.00109046
	12.3689	-0.00108931
	12.3847	-0.001053
	12.4005	-0.000993226
	12.4162	-0.00098895
	12.432	-0.000995161
	12.4478	-0.000991556
	12.4636	-0.000979247
	12.4794	-0.000974264
	12.4952	-0.000972306
	12.511	-0.000966142
	12.5268	-0.000936344
	12.5426	-0.000909
	12.5584	-0.000904055
	12.5741	-0.000910388
	12.5899	-0.000918285
	12.6057	-0.000926181
	12.6215	-0.000945241
	12.6373	-0.000950784
	12.6531	-0.000942779
	12.6689	-0.00091065
	12.6847	-0.000908692
	12.7005	-0.000916244
	12.7162	-0.000923796
	12.732	-0.000931533
	12.7478	-0.000948561
	12.7636	-0.000966613
	12.7794	-0.000978627
	12.7952	-0.000968612
	12.811	-0.000929732
	12.8268	-0.0009223
	12.8426	-0.000929538
	12.8584	-0.000939424
	12.8741	-0.00094931
	12.8899	-0.000957303
	12.9057	-0.000963091
	12.9215	-0.000968878
	12.9373	-0.00096897
	12.9531	-0.000938835
	12.9689	-0.00095061
	12.9847	-0.000962386
	13.0005	-0.000980501
	13.0162	-0.0009984
	13.032	-0.00100386
	13.0478	-0.001018
	13.0636	-0.00103214
	13.0794	-0.0010477
	13.0952	-0.00105802
	13.111	-0.00106834
	13.1268	-0.00108388
	13.1426	-0.00110601
	13.1584	-0.001126
	13.1741	-0.00116061
	13.1899	-0.00119154
	13.2057	-0.00122599
	13.2215	-0.00122707
	13.2373	-0.00121544
	13.2531	-0.00121868
	13.2689	-0.00123321
	13.2847	-0.00124775
	13.3005	-0.00126054
	13.3163	-0.00127024
	13.332	-0.00127993
	13.3478	-0.00129696
	13.3636	-0.0012951
	13.3794	-0.00129542
	13.3952	-0.00130067
	13.411	-0.00131836
	13.4268	-0.00133606
	13.4426	-0.00135888
	13.4584	-0.00137596
	13.4741	-0.00139048
	13.4899	-0.00141232
	13.5057	-0.00140217
	13.5215	-0.00140339
	13.5373	-0.00140784
	13.5531	-0.00141846
	13.5689	-0.00142908
	13.5847	-0.0014459
	13.6005	-0.0014595
	13.6163	-0.0014727
	13.632	-0.00148957
	13.6478	-0.00149059
	13.6636	-0.00149486
	13.6794	-0.00150915
	13.6952	-0.00152344
	13.711	-0.00154177
	13.7268	-0.00156527
	13.7426	-0.00160593
	13.7584	-0.00164079
	13.7742	-0.00164757
	13.7899	-0.00161401
	13.8057	-0.00161427
	13.8215	-0.00161978
	13.8373	-0.00163245
	13.8531	-0.00164512
	13.8689	-0.00165887
	13.8847	-0.00167297
	13.9005	-0.00168637
	13.9163	-0.00169114
	13.932	-0.00165519
	13.9478	-0.00165767
	13.9636	-0.00166308
	13.9794	-0.00167243
	13.9952	-0.00168177
	14.011	-0.001686
	14.0268	-0.00169332
	14.0426	-0.00170063
	14.0584	-0.00170135
	14.0742	-0.00167055
	14.0899	-0.00168043
	14.1057	-0.00169032
	14.1215	-0.00170731
	14.1373	-0.0017142
	14.1531	-0.00171913
	14.1689	-0.0017302
	14.1847	-0.00174128
	14.2005	-0.00174558
	14.2163	-0.00170893
	14.232	-0.00170008
	14.2478	-0.0017069
	14.2636	-0.0017146
	14.2794	-0.00172231
	14.2952	-0.0017309
	14.311	-0.00174121
	14.3268	-0.00174875
	14.3426	-0.00173505
	14.3584	-0.00172135
	14.3742	-0.00171868
	14.3899	-0.00171602
	14.4057	-0.00172281
	14.4215	-0.00173163
	14.4373	-0.00174045
	14.4531	-0.00176173
	14.4689	-0.00176727
	14.4847	-0.00174823
	14.5005	-0.00169947
	14.5163	-0.00167024
	14.5321	-0.00167899
	14.5478	-0.00168774
	14.5636	-0.00169815
	14.5794	-0.00168281
	14.5952	-0.00167697
	14.611	-0.00168066
	14.6268	-0.00164944
	14.6426	-0.00161814
	14.6584	-0.00160786
	14.6742	-0.0016133
	14.6899	-0.00161874
	14.7057	-0.00162539
	14.7215	-0.00163376
	14.7373	-0.00164214
	14.7531	-0.00164222
	14.7689	-0.00160193
	14.7847	-0.0015556
	14.8005	-0.00154803
	14.8163	-0.00154958
	14.8321	-0.00155112
	14.8478	-0.00154864
	14.8636	-0.0015328
	14.8794	-0.00152496
	14.8952	-0.00151027
	14.911	-0.00145091
	14.9268	-0.00143547
	14.9426	-0.0014356
	14.9584	-0.00143955
	14.9742	-0.00144349
	14.9899	-0.0014335
	15.0057	-0.00140714
	15.0215	-0.00141331
	15.0373	-0.00141947
	15.0531	-0.00139757
	15.0689	-0.00137537
	15.0847	-0.00137604
	15.1005	-0.00137672
	15.1163	-0.00137963
	15.1321	-0.00138254
	15.1478	-0.00138949
	15.1636	-0.0013603
	15.1794	-0.00135685
	15.1952	-0.00130776
	15.211	-0.00126796
	15.2268	-0.00125901
	15.2426	-0.00126585
	15.2584	-0.00125629
	15.2742	-0.0012404
	15.29	-0.00124693
	15.3057	-0.00125346
	15.3215	-0.00124426
	15.3373	-0.0012223
	15.3531	-0.00121564
	15.3689	-0.00120898
	15.3847	-0.00119795
	15.4005	-0.00118504
	15.4163	-0.00116574
	15.4321	-0.00115719
	15.4478	-0.00116199
	15.4636	-0.0011504
	15.4794	-0.0011239
	15.4952	-0.00112497
	15.511	-0.00112978
	15.5268	-0.00113646
	15.5426	-0.00115086
	15.5584	-0.00116526
	15.5742	-0.00117353
	15.59	-0.00116623
	15.6057	-0.00114694
	15.6215	-0.00110208
	15.6373	-0.00110003
	15.6531	-0.00110313
	15.6689	-0.00110624
	15.6847	-0.00110509
	15.7005	-0.00107379
	15.7163	-0.00107943
	15.7321	-0.00108506
	15.7479	-0.00106363
	15.7636	-0.00101093
	15.7794	-0.00101811
	15.7952	-0.0010253
	15.811	-0.00101542
	15.8268	-0.00101989
	15.8426	-0.00102196
	15.8584	-0.00102799
	15.8742	-0.00103403
	15.89	-0.00100275
	15.9057	-0.00099091
	15.9215	-0.000988975
	15.9373	-0.000992703
	15.9531	-0.000996432
	15.9689	-0.00100128
	15.9847	-0.00100944
	16.0005	-0.00101759
	16.0163	-0.00103309
	16.0321	-0.00100097
	16.0479	-0.000980702
	16.0636	-0.000987784
	16.0794	-0.00099752
	16.0952	-0.00100726
	16.111	-0.0010215
	16.1268	-0.00103736
	16.1426	-0.00104879
	16.1584	-0.00104771
	16.1742	-0.0010099
	16.19	-0.00099792
	16.2057	-0.000998614
	16.2215	-0.00100639
	16.2373	-0.00101417
	16.2531	-0.00102601
	16.2689	-0.00103485
	16.2847	-0.00103936
	16.3005	-0.00103316
	16.3163	-0.000990858
	16.3321	-0.000991921
	16.3479	-0.000996643
	16.3636	-0.00100136
	16.3794	-0.00100848
	16.3952	-0.00101399
	16.411	-0.0010195
	16.4268	-0.00102656
	16.4426	-0.00100669
	16.4584	-0.000959162
	16.4742	-0.000957941
	16.49	-0.000964571
	16.5058	-0.000972238
	16.5215	-0.000979905
	16.5373	-0.000971925
	16.5531	-0.000967655
	16.5689	-0.000965494
	16.5847	-0.000941118
	16.6005	-0.000913718
	16.6163	-0.000918421
	16.6321	-0.000925877
	16.6479	-0.000933334
	16.6636	-0.000942554
	16.6794	-0.000952064
	16.6952	-0.000972087
	16.711	-0.000983229
	16.7268	-0.000951301
	16.7426	-0.00091214
	16.7584	-0.000918219
	16.7742	-0.000926697
	16.79	-0.000935176
	16.8058	-0.000933271
	16.8215	-0.000940787
	16.8373	-0.000948303
	16.8531	-0.0009567
	16.8689	-0.000926055
	16.8847	-0.000909648
	16.9005	-0.000909166
	16.9163	-0.000914401
	16.9321	-0.000919636
	16.9479	-0.00092397
	16.9636	-0.000930931
	16.9794	-0.000942169
	16.9952	-0.000953407
	17.011	-0.000947188
	17.0268	-0.000912313
	17.0426	-0.000914602
	17.0584	-0.000923228
	17.0742	-0.000931854
	17.09	-0.000970625
	17.1058	-0.000993136
	17.1215	-0.001021
	17.1373	-0.00103162
	17.1531	-0.000991618
	17.1689	-0.000989079
	17.1847	-0.000992088
	17.2005	-0.00100112
	17.2163	-0.00101016
	17.2321	-0.0010228
	17.2479	-0.00103267
	17.2637	-0.00104253
	17.2794	-0.00106549
	17.2952	-0.00103008
	17.311	-0.00102833
	17.3268	-0.00103173
	17.3426	-0.00104251
	17.3584	-0.0010533
	17.3742	-0.00107384
	17.39	-0.00110222
	17.4058	-0.0011167
	17.4215	-0.00110556
	17.4373	-0.00107991
	17.4531	-0.00109011
	17.4689	-0.00110031
	17.4847	-0.00111429
	17.5005	-0.00113788
	17.5163	-0.00114591
	17.5321	-0.0011624
	17.5479	-0.00116939
	17.5637	-0.00116273
	17.5794	-0.00116148
	17.5952	-0.0011665
	17.611	-0.00117803
	17.6268	-0.00118955
	17.6426	-0.00121411
	17.6584	-0.00122821
	17.6742	-0.00125747
	17.69	-0.00128844
	17.7058	-0.00129377
	17.7215	-0.00126327
	17.7373	-0.00127118
	17.7531	-0.00127909
	17.7689	-0.00129143
	17.7847	-0.0013111
	17.8005	-0.00133303
	17.8163	-0.00135838
	17.8321	-0.00138206
	17.8479	-0.00137723
	17.8637	-0.00136935
	17.8794	-0.00137068
	17.8952	-0.00138296
	17.911	-0.00139524
	17.9268	-0.00141627
	17.9426	-0.00142694
	17.9584	-0.00143977
	17.9742	-0.00147785
	17.99	-0.00147974
	18.0058	-0.00147486
	18.0216	-0.00148003
	18.0373	-0.00150202
	18.0531	-0.00152401
	18.0689	-0.00155799
	18.0847	-0.00156701
	18.1005	-0.00159329
	18.1163	-0.00161616
	18.1321	-0.00160556
	18.1479	-0.00161318
	18.1637	-0.00162079
	18.1794	-0.00163713
	18.1952	-0.00167847
	18.211	-0.00171357
	18.2268	-0.00173858
	18.2426	-0.00177022
	18.2584	-0.00179361
	18.2742	-0.00177416
	18.29	-0.00178674
	18.3058	-0.00179932
	18.3216	-0.00181804
	18.3373	-0.00184301
	18.3531	-0.00185455
	18.3689	-0.0018661
	18.3847	-0.00188261
	18.4005	-0.00188266
	18.4163	-0.0018819
	18.4321	-0.00188979
	18.4479	-0.00189767
	18.4637	-0.00193148
	18.4795	-0.00196066
	18.4952	-0.0019721
	18.511	-0.00198499
	18.5268	-0.00199787
	18.5426	-0.00202272
	18.5584	-0.00200244
	18.5742	-0.00201433
	18.59	-0.00202623
	18.6058	-0.00204345
	18.6216	-0.00207777
	18.6373	-0.00209928
	18.6531	-0.00213211
	18.6689	-0.00215647
	18.6847	-0.00216533
	18.7005	-0.00214203
	18.7163	-0.00214774
	18.7321	-0.00215626
	18.7479	-0.00216479
	18.7637	-0.00217555
	18.7795	-0.00218782
	18.7952	-0.00220009
	18.811	-0.00221741
	18.8268	-0.00221917
	18.8426	-0.00219539
	18.8584	-0.00220032
	18.8742	-0.00220876
	18.89	-0.00221719
	18.9058	-0.00225256
	18.9216	-0.0022617
	18.9373	-0.00227084
	18.9531	-0.00230825
	18.9689	-0.00230548
	18.9847	-0.00227119
	19.0005	-0.00228545
	19.0163	-0.00229972
	19.0321	-0.0023218
	19.0479	-0.00233784
	19.0637	-0.00235025
	19.0795	-0.0023697
	19.0952	-0.00238633
	19.111	-0.00236264
	19.1268	-0.00236153
	19.1426	-0.00236631
	19.1584	-0.00238348
	19.1742	-0.00240066
	19.19	-0.00242136
	19.2058	-0.00244426
	19.2216	-0.00246938
	19.2374	-0.00248162
	19.2531	-0.00245642
	19.2689	-0.00245673
	19.2847	-0.00246091
	19.3005	-0.00247299
	19.3163	-0.00248506
	19.3321	-0.00250667
	19.3479	-0.00251746
	19.3637	-0.00252532
	19.3795	-0.00253615
	19.3952	-0.00252314
	19.411	-0.00252995
	19.4268	-0.00254167
	19.4426	-0.00255339
	19.4584	-0.00257285
	19.4742	-0.00257954
	19.49	-0.00258851
	19.5058	-0.00259748
	19.5216	-0.00262232
	19.5374	-0.00262353
	19.5531	-0.00263117
	19.5689	-0.0026388
	19.5847	-0.00265547
	19.6005	-0.00266913
	19.6163	-0.00268763
	19.6321	-0.00272455
	19.6479	-0.00276882
	19.6637	-0.0027848
	19.6795	-0.00276605
	19.6952	-0.00277337
	19.711	-0.00278296
	19.7268	-0.00279255
	19.7426	-0.00281256
	19.7584	-0.00282323
	19.7742	-0.0028339
	19.79	-0.00285413
	19.8058	-0.00287076
	19.8216	-0.00285317
	19.8374	-0.00285907
	19.8531	-0.00286827
	19.8689	-0.00287747
	19.8847	-0.00290518
	19.9005	-0.00291525
	19.9163	-0.00292533
	19.9321	-0.00295632
	19.9479	-0.00296036
	19.9637	-0.00295087
	19.9795	-0.00295201
	19.9953	-0.00297158
	20.011	-0.00299115
	20.0268	-0.00302161
	20.0426	-0.00303132
	20.0584	-0.0030479
	20.0742	-0.00307604
	20.09	-0.00305594
	20.1058	-0.00304072
	20.1216	-0.00304206
	20.1374	-0.00305681
	20.1531	-0.00307157
	20.1689	-0.00309301
	20.1847	-0.00311638
	20.2005	-0.00314435
	20.2163	-0.00315624
	20.2321	-0.00312681
	20.2479	-0.00310386
	20.2637	-0.00311291
	20.2795	-0.00312197
	20.2953	-0.00313308
	20.311	-0.00313987
	20.3268	-0.00313164
	20.3426	-0.00313638
	20.3584	-0.00314112
	20.3742	-0.00311576
	20.39	-0.00308283
	20.4058	-0.0030904
	20.4216	-0.00309796
	20.4374	-0.00310764
	20.4531	-0.00310179
	20.4689	-0.00309966
	20.4847	-0.00310602
	20.5005	-0.00311238
	20.5163	-0.00309159
	20.5321	-0.00307148
	20.5479	-0.00306789
	20.5637	-0.00307111
	20.5795	-0.00307684
	20.5953	-0.00307856
	20.611	-0.00308505
	20.6268	-0.00309217
	20.6426	-0.00309928
	20.6584	-0.00306668
	20.6742	-0.00303401
	20.69	-0.00303657
	20.7058	-0.00304212
	20.7216	-0.00304767
	20.7374	-0.00304981
	20.7532	-0.00305601
	20.7689	-0.00306222
	20.7847	-0.00306174
	20.8005	-0.00301995
	20.8163	-0.00300427
	20.8321	-0.003001
	20.8479	-0.00300567
	20.8637	-0.00301035
	20.8795	-0.00299925
	20.8953	-0.00299816
	20.911	-0.00299707
	20.9268	-0.003002
	20.9426	-0.00296989
	20.9584	-0.00297246
	20.9742	-0.00297939
	20.99	-0.00298669
	21.0058	-0.00299399
	21.0216	-0.00299711
	21.0374	-0.00300272
	21.0532	-0.00300834
	21.0689	-0.00298875
	21.0847	-0.00295366
	21.1005	-0.0029647
	21.1163	-0.00297574
	21.1321	-0.00299129
	21.1479	-0.0030125
	21.1637	-0.00300551
	21.1795	-0.00301096
	21.1953	-0.00301641
	21.2111	-0.00301109
	21.2268	-0.0030031
	21.2426	-0.00300597
	21.2584	-0.00301388
	21.2742	-0.00302179
	21.29	-0.00304678
	21.3058	-0.00306404
	21.3216	-0.00307565
	21.3374	-0.00310716
	21.3532	-0.0031071
	21.3689	-0.00310069
	21.3847	-0.00310335
	21.4005	-0.00310932
	21.4163	-0.00312046
	21.4321	-0.0031316
	21.4479	-0.00314197
	21.4637	-0.00315234
	21.4795	-0.00316834
	21.4953	-0.00314758
	21.5111	-0.00315495
	21.5268	-0.00316575
	21.5426	-0.00317654
	21.5584	-0.00319838
	21.5742	-0.00322284
	21.59	-0.00326525
	21.6058	-0.00330103
	21.6216	-0.00332439
	21.6374	-0.00331278
	21.6532	-0.00331089
	21.6689	-0.00331391
	21.6847	-0.00333047
	21.7005	-0.00334704
	21.7163	-0.00335538
	21.7321	-0.00337321
	21.7479	-0.00340812
	21.7637	-0.0034311
	21.7795	-0.00342087
	21.7953	-0.0034231
	21.8111	-0.00343091
	21.8268	-0.00343872
	21.8426	-0.00347552
	21.8584	-0.00348587
	21.8742	-0.00349625
	21.89	-0.00351355
	21.9058	-0.00352128
	21.9216	-0.00349936
	21.9374	-0.00350839
	21.9532	-0.00351742
	21.969	-0.00353293
	21.9847	-0.00356726
	22.0005	-0.0035745
	22.0163	-0.00358146
	22.0321	-0.00358871
	22.0479	-0.00359595
	22.0637	-0.00357668
	22.0795	-0.00358599
	22.0953	-0.0035953
	22.1111	-0.00360815
	22.1268	-0.00363341
	22.1426	-0.0036288
	22.1584	-0.00363678
	22.1742	-0.00364476
	22.19	-0.00365485
	22.2058	-0.00362554
	22.2216	-0.00362696
	22.2374	-0.0036329
	22.2532	-0.0036423
	22.269	-0.00365171
	22.2847	-0.00363533
	22.3005	-0.00364208
	22.3163	-0.00364883
	22.3321	-0.00363598
	22.3479	-0.0035977
	22.3637	-0.00359679
	22.3795	-0.00359587
	22.3953	-0.0035989
	22.4111	-0.00359039
	22.4268	-0.00358471
	22.4426	-0.00358528
	22.4584	-0.00358842
	22.4742	-0.00357172
	22.49	-0.00352266
	22.5058	-0.00350245
	22.5216	-0.00349755
	22.5374	-0.00350527
	22.5532	-0.00351299
	22.569	-0.00352153
	22.5847	-0.00352984
	22.6005	-0.00353414
	22.6163	-0.00350021
	22.6321	-0.00343427
	22.6479	-0.00341102
	22.6637	-0.00341727
	22.6795	-0.00342352
	22.6953	-0.00342813
	22.7111	-0.003424
	22.7269	-0.00340782
	22.7426	-0.00338612
	22.7584	-0.00333639
	22.7742	-0.00327216
	22.79	-0.00325611
	22.8058	-0.00326316
	22.8216	-0.00327022
	22.8374	-0.00325597
	22.8532	-0.00323574
	22.869	-0.00322902
	22.8847	-0.00321827
	22.9005	-0.00316678
	22.9163	-0.00313128
	22.9321	-0.003132
	22.9479	-0.00313279
	22.9637	-0.00313673
	22.9795	-0.00311531
	22.9953	-0.00309381
	23.0111	-0.00308709
	23.0269	-0.0030882
	23.0426	-0.00305887
	23.0584	-0.00302425
	23.0742	-0.00301392
	23.09	-0.00301955
	23.1058	-0.00302146
	23.1216	-0.00301824
	23.1374	-0.00302411
	23.1532	-0.00302997
	23.169	-0.00302602
	23.1848	-0.00297367
	23.2005	-0.0029287
	23.2163	-0.00292855
	23.2321	-0.00292878
	23.2479	-0.00291299
	23.2637	-0.00288934
	23.2795	-0.00288716
	23.2953	-0.00288497
	23.3111	-0.00288217
	23.3269	-0.00285567
	23.3426	-0.00283315
	23.3584	-0.00282881
	23.3742	-0.00282212
	23.39	-0.00281717
	23.4058	-0.00281803
	23.4216	-0.00282347
	23.4374	-0.00282892
	23.4532	-0.00281086
	23.469	-0.00277754
	23.4848	-0.0027535
	23.5005	-0.00275526
	23.5163	-0.00276145
	23.5321	-0.00277393
	23.5479	-0.00278641
	23.5637	-0.00279824
	23.5795	-0.0028005
	23.5953	-0.00278448
	23.6111	-0.00272121
	23.6269	-0.00271219
	23.6426	-0.00271183
	23.6584	-0.0027158
	23.6742	-0.00271977
	23.69	-0.00270814
	23.7058	-0.00270846
	23.7216	-0.00270889
	23.7374	-0.00266846
	23.7532	-0.00261654
	23.769	-0.00262291
	23.7848	-0.00263042
	23.8005	-0.00263793
	23.8163	-0.00262951
	23.8321	-0.00261942
	23.8479	-0.00261594
	23.8637	-0.00261895
	23.8795	-0.00259114
	23.8953	-0.00255255
	23.9111	-0.00255667
	23.9269	-0.00256079
	23.9427	-0.0025604
	23.9584	-0.00254559
	23.9742	-0.0025201
	23.99	-0.00251555
	24.0058	-0.0025191
	24.0216	-0.00246895
	24.0374	-0.00241413
	24.0532	-0.00238802
	24.069	-0.00238577
	24.0848	-0.00237664
	24.1005	-0.00232899
	24.1163	-0.00228087
	24.1321	-0.00227081
	24.1479	-0.00225029
	24.1637	-0.00218172
	24.1795	-0.00210904
	24.1953	-0.00206904
	24.2111	-0.0020171
	24.2269	-0.0019612
	24.2427	-0.00188913
	24.2584	-0.00182133
	24.2742	-0.00176777
	24.29	-0.00169806
	24.3058	-0.00158131
	24.3216	-0.00146748
	24.3374	-0.00136471
	24.3532	-0.00126046
	24.369	-0.00114941
	24.3848	-0.00100906
	24.4005	-0.000861162
	24.4163	-0.000716278
	24.4321	-0.000538941
	24.4479	-0.000321277
	24.4637	-9.10562e-05
	24.4795	0.000120409
	24.4953	0.000327486
	24.5111	0.000547161
	24.5269	0.000781231
	24.5427	0.00104151
	24.5584	0.00132324
	24.5742	0.00163152
	24.59	0.00198237
	24.6058	0.0023271
	24.6216	0.0026567
	24.6374	0.00300139
	24.6532	0.00333877
	24.669	0.00370844
	24.6848	0.00406771
	24.7006	0.00443147
	24.7163	0.00481244
	24.7321	0.00521653
	24.7479	0.00559766
	24.7637	0.00595892
	24.7795	0.00629387
	24.7953	0.00663415
	24.8111	0.00699984
	24.8269	0.00733977
	24.8427	0.00764436
	24.8584	0.0079584
	24.8742	0.00827987
	24.89	0.00857006
	24.9058	0.00881726
	24.9216	0.00906284
	24.9374	0.00928634
	24.9532	0.00949902
	24.969	0.00968837
	24.9848	0.00984952
	25.0006	0.0100307
	25.0163	0.0102125
	25.0321	0.0103502
	25.0479	0.0104516
	25.0637	0.0105457
	25.0795	0.0106228
	25.0953	0.0106683
	25.1111	0.010706
	25.1269	0.0107655
	25.1427	0.0108525
	25.1584	0.0109435
	25.1742	0.0109843
	25.19	0.0110132
	25.2058	0.0110361
	25.2216	0.0110636
	25.2374	0.0110964
	25.2532	0.0111187
	25.269	0.0111385
	25.2848	0.0112055
	25.3006	0.0112808
	25.3163	0.0113283
	25.3321	0.0113567
	25.3479	0.0113834
	25.3637	0.0114173
	25.3795	0.0114559
	25.3953	0.011504
	25.4111	0.0115622
	25.4269	0.0116573
	25.4427	0.0117531
	25.4585	0.0118142
	25.4742	0.011865
	25.49	0.0119175
	25.5058	0.0119646
	25.5216	0.0120192
	25.5374	0.0120767
	25.5532	0.0121579
	25.569	0.0122713
	25.5848	0.012359
	25.6006	0.0124013
	25.6163	0.0124471
	25.6321	0.0124882
	25.6479	0.0125187
	25.6637	0.0125463
	25.6795	0.0125809
	25.6953	0.0126147
	25.7111	0.012674
	25.7269	0.0126851
	25.7427	0.0126846
	25.7585	0.0126735
	25.7742	0.0126623
	25.79	0.012655
	25.8058	0.0126391
	25.8216	0.0126232
	25.8374	0.0125807
	25.8532	0.0125606
	25.869	0.0125203
	25.8848	0.0124459
	25.9006	0.012369
	25.9164	0.0123027
	25.9321	0.0122361
	25.9479	0.0121403
	25.9637	0.0120361
	25.9795	0.0119646
	25.9953	0.0119109
	26.0111	0.0118351
	26.0269	0.011722
	26.0427	0.0116069
	26.0585	0.0114824
	26.0742	0.0113443
	26.09	0.011215
	26.1058	0.0110827
	26.1216	0.0110032
	26.1374	0.0109415
	26.1532	0.0108275
	26.169	0.0107008
	26.1848	0.0105772
	26.2006	0.0104499
	26.2164	0.0103305
	26.2321	0.0101996
	26.2479	0.0100779
	26.2637	0.0099961
	26.2795	0.00992499
	26.2953	0.00981103
	26.3111	0.00968195
	26.3269	0.00955624
	26.3427	0.00943018
	26.3585	0.00930342
	26.3742	0.00919152
	26.39	0.0091019
	26.4058	0.00903638
	26.4216	0.00896094
	26.4374	0.00884592
	26.4532	0.00873462
	26.469	0.00862975
	26.4848	0.0085259
	26.5006	0.0084032
	26.5164	0.0083064
	26.5321	0.00823621
	26.5479	0.00818868
	26.5637	0.00812394
	26.5795	0.00803443
	26.5953	0.00793267
	26.6111	0.00784357
	26.6269	0.00775684
	26.6427	0.00766761
	26.6585	0.00758524
	26.6743	0.00751552
	26.69	0.00747157
	26.7058	0.00742873
	26.7216	0.00736436
	26.7374	0.00728154
	26.7532	0.00721031
	26.769	0.00716717
	26.7848	0.00711268
	26.8006	0.00703082
	26.8164	0.00697378
	26.8321	0.00695745
	26.8479	0.00691917
	26.8637	0.00685218
	26.8795	0.00679644
	26.8953	0.00675076
	26.9111	0.00669886
	26.9269	0.00663329
	26.9427	0.00658475
	26.9585	0.00656171
	26.9743	0.00655201
	26.99	0.0065423
	27.0058	0.006528
	27.0216	0.00648139
	27.0374	0.00644438
	27.0532	0.00641661
	27.069	0.00638136
	27.0848	0.00636201
	27.1006	0.00638299
	27.1164	0.00644036
	27.1321	0.00647309
	27.1479	0.00648403
	27.1637	0.00650135
	27.1795	0.00653114
	27.1953	0.00658801
	27.2111	0.00664449
	27.2269	0.0067079
	27.2427	0.00682424
	27.2585	0.00696832
	27.2743	0.00708189
	27.29	0.0072145
	27.3058	0.00736109
	27.3216	0.00753319
	27.3374	0.00775328
	27.3532	0.00800036
	27.369	0.0082974
	27.3848	0.00866428
	27.4006	0.00907256
	27.4164	0.0095212
	27.4322	0.0100296
	27.4479	0.0106238
	27.4637	0.0113052
	27.4795	0.0120845
	27.4953	0.0129954
	27.5111	0.0140379
	27.5269	0.015259
	27.5427	0.0166782
	27.5585	0.0182647
	27.5743	0.0200619
	27.59	0.0221064
	27.6058	0.024417
	27.6216	0.0270425
	27.6374	0.0300251
	27.6532	0.0333894
	27.669	0.0371888
	27.6848	0.0414871
	27.7006	0.0462831
	27.7164	0.0516095
	27.7322	0.0574672
	27.7479	0.0639341
	27.7637	0.0710961
	27.7795	0.0790146
	27.7953	0.0877013
	27.8111	0.0971764
	27.8269	0.107527
	27.8427	0.118792
	27.8585	0.130934
	27.8743	0.143922
	27.89	0.157798
	27.9058	0.172729
	27.9216	0.188772
	27.9374	0.205762
	27.9532	0.223759
	27.969	0.243026
	27.9848	0.263393
	28.0006	0.284555
	28.0164	0.306453
	28.0322	0.329435
	28.0479	0.353597
	28.0637	0.378458
	28.0795	0.403855
	28.0953	0.429821
	28.1111	0.45663
	28.1269	0.483809
	28.1427	0.511243
	28.1585	0.539006
	28.1743	0.566636
	28.1901	0.594313
	28.2058	0.622147
	28.2216	0.649719
	28.2374	0.676776
	28.2532	0.703502
	28.269	0.72944
	28.2848	0.754637
	28.3006	0.779281
	28.3164	0.803048
	28.3322	0.826053
	28.3479	0.848065
	28.3637	0.868785
	28.3795	0.88824
	28.3953	0.906434
	28.4111	0.92326
	28.4269	0.938519
	28.4427	0.95213
	28.4585	0.964157
	28.4743	0.974575
	28.4901	0.983308
	28.5058	0.990343
	28.5216	0.99569
	28.5374	0.999341
	28.5532	0.999987
	28.569	1
	28.5848	0.998479
	28.6006	0.996959
	28.6164	0.992329
	28.6322	0.986202
	28.648	0.978714
	28.6637	0.96979
	28.6795	0.959424
	28.6953	0.94776
	28.7111	0.934934
	28.7269	0.921173
	28.7427	0.906416
	28.7585	0.8906
	28.7743	0.873952
	28.7901	0.856645
	28.8058	0.838658
	28.8216	0.819965
	28.8374	0.800643
	28.8532	0.780948
	28.869	0.760995
	28.8848	0.741044
	28.9006	0.720989
	28.9164	0.700492
	28.9322	0.679961
	28.948	0.659273
	28.9637	0.638316
	28.9795	0.61748
	28.9953	0.597098
	29.0111	0.576995
	29.0269	0.557144
	29.0427	0.537289
	29.0585	0.517763
	29.0743	0.499056
	29.0901	0.480663
	29.1058	0.462482
	29.1216	0.44449
	29.1374	0.427153
	29.1532	0.410576
	29.169	0.394451
	29.1848	0.378623
	29.2006	0.36332
	29.2164	0.348761
	29.2322	0.334345
	29.248	0.320431
	29.2637	0.307398
	29.2795	0.294926
	29.2953	0.28299
	29.3111	0.271542
	29.3269	0.260579
	29.3427	0.25005
	29.3585	0.239901
	29.3743	0.230255
	29.3901	0.221048
	29.4059	0.212289
	29.4216	0.203989
	29.4374	0.196109
	29.4532	0.188558
	29.469	0.18133
	29.4848	0.174536
	29.5006	0.168137
	29.5164	0.16194
	29.5322	0.156005
	29.548	0.150375
	29.5637	0.145025
	29.5795	0.139924
	29.5953	0.135052
	29.6111	0.130432
	29.6269	0.126104
	29.6427	0.121988
	29.6585	0.118016
	29.6743	0.114204
	29.6901	0.110562
	29.7059	0.107137
	29.7216	0.103881
	29.7374	0.100751
	29.7532	0.0977698
	29.769	0.094995
	29.7848	0.0923709
	29.8006	0.0898076
	29.8164	0.0873337
	29.8322	0.0849725
	29.848	0.0827528
	29.8637	0.0806384
	29.8795	0.0785965
	29.8953	0.076656
	29.9111	0.0748568
	29.9269	0.0731328
	29.9427	0.0714307
	29.9585	0.0698072
	29.9743	0.0682554
	29.9901	0.0667849
	30.0059	0.0653887
	30.0216	0.0640565
	30.0374	0.0628063
	30.0532	0.0616646
	30.069	0.0605446
	30.0848	0.0594459
	30.1006	0.058399
	30.1164	0.0574197
	30.1322	0.0565127
	30.148	0.0556528
	30.1638	0.0548067
	30.1795	0.0540008
	30.1953	0.0533077
	30.2111	0.0526468
	30.2269	0.0519827
	30.2427	0.0513415
	30.2585	0.0507535
	30.2743	0.0502178
	30.2901	0.0497104
	30.3059	0.0492312
	30.3216	0.0488277
	30.3374	0.0484875
	30.3532	0.0481604
	30.369	0.047834
	30.3848	0.0475438
	30.4006	0.0472878
	30.4164	0.0470693
	30.4322	0.0468852
	30.448	0.0467262
	30.4638	0.0466298
	30.4795	0.0465919
	30.4953	0.0465554
	30.5111	0.0465194
	30.5269	0.046509
	30.5427	0.0465218
	30.5585	0.0465679
	30.5743	0.0466488
	30.5901	0.0467678
	30.6059	0.0469495
	30.6217	0.047195
	30.6374	0.0474399
	30.6532	0.0476854
	30.669	0.0479558
	30.6848	0.0482649
	30.7006	0.0486269
	30.7164	0.0490246
	30.7322	0.0494426
	30.748	0.0499331
	30.7638	0.0504838
	30.7795	0.0510291
	30.7953	0.0515885
	30.8111	0.052192
	30.8269	0.052841
	30.8427	0.0535279
	30.8585	0.0542629
	30.8743	0.0550728
	30.8901	0.0559447
	30.9059	0.0568682
	30.9217	0.057814
	30.9374	0.0588089
	30.9532	0.0598503
	30.969	0.0609327
	30.9848	0.0620875
	31.0006	0.0632924
	31.0164	0.0645251
	31.0322	0.0658432
	31.048	0.0671998
	31.0638	0.0685724
	31.0795	0.0699878
	31.0953	0.0714055
	31.1111	0.0728848
	31.1269	0.0744018
	31.1427	0.0759262
	31.1585	0.0774759
	31.1743	0.0790721
	31.1901	0.0806874
	31.2059	0.0823046
	31.2217	0.0838947
[truncated: 1,166 more rows]

## Sheet: Exp2
SEC-MALS TseV3-TsiV3 Exp2	time (min)	TseV3-TsiV3 (dRI)	time (min)	TseV3-TsiV3 (Molar mass)
	-0.315209	6.26943	25.6004	148073
	-0.299419	0.00253246	25.6173	147576
	-0.28363	0.00254823	25.6341	146925
	-0.26784	0.00253999	25.6509	146376
	-0.252051	0.00253175	25.6678	146009
	-0.236261	0.00251852	25.6846	145683
	-0.220471	0.00250066	25.7014	145263
	-0.204682	0.00248791	25.7183	144790
	-0.188892	0.00247611	25.7351	144276
	-0.173103	0.00246313	25.7519	143793
	-0.157313	0.0024465	25.7688	143496
	-0.141523	0.0024281	25.7856	143205
	-0.125734	0.00240971	25.8024	142891
	-0.109944	0.00239155	25.8193	142547
	-0.0941547	0.0023749	25.8361	142178
	-0.0783651	0.00236349	25.8529	141840
	-0.0625755	0.00235467	25.8698	141523
	-0.0467859	0.00234383	25.8866	141204
	-0.0309963	0.00233218	25.9034	140906
	-0.0152067	0.00232166	25.9203	140603
	0.00058295	0.00231166	25.9371	140240
	0.0163726	0.0023005	25.9539	139978
	0.0321622	0.00228611	25.9708	139694
	0.0479518	0.00227256	25.9876	139462
	0.0637414	0.0022633	26.0044	139279
	0.079531	0.00225529	26.0213	139051
	0.0953206	0.00224576	26.0381	138867
	0.11111	0.00223699	26.0549	138630
	0.1269	0.0022307	26.0718	138401
	0.142689	0.00222326	26.0886	138115
	0.158479	0.002213	26.1055	137821
	0.174269	0.00220389	26.1223	137665
	0.190058	0.00219525	26.1391	137464
	0.205848	0.00219135	26.156	137234
	0.221637	0.00218658	26.1728	136959
	0.237427	0.0021818	26.1896	136765
	0.253217	0.00217646	26.2065	136468
	0.269006	0.00217007	26.2233	136163
	0.284796	0.00216519	26.2401	135829
	0.300585	0.00215557	26.257	135510
	0.316375	0.00214729	26.2738	135158
	0.332165	0.00214293	26.2906	134910
	0.347954	0.00213839	26.3075	134676
	0.363744	0.00213386	26.3243	134393
	0.379533	0.00212708	26.3411	134086
	0.395323	0.0021207	26.358	133454
	0.411113	0.00211432	28.2266	75117.5
	0.426902	0.0021073	28.2434	76271.8
	0.442692	0.00209988	28.2603	75921.3
	0.458481	0.00209122	28.2771	75733.2
	0.474271	0.00208475	28.2939	75534
	0.490061	0.00208065	28.3108	75308.7
	0.50585	0.00207631	28.3276	75098.4
	0.52164	0.00207108	28.3444	74899
	0.537429	0.00206585	28.3613	74724.2
	0.553219	0.00205755	28.3781	74572.7
	0.569009	0.00204889	28.395	74459.5
	0.584798	0.00204088	28.4118	74332.8
	0.600588	0.00203308	28.4286	74225.9
	0.616377	0.00202582	28.4455	74167.1
	0.632167	0.00202138	28.4623	74094.7
	0.647957	0.00201469	28.4791	74055.1
	0.663746	0.00200736	28.496	74005.8
	0.679536	0.00199942	28.5128	73975.7
	0.695325	0.00199284	28.5296	73979.8
	0.711115	0.00198538	28.5465	73956.6
	0.726905	0.00197526	28.5633	73928.3
	0.742694	0.00196492	28.5801	73975
	0.758484	0.00195591	28.597	74013.7
	0.774273	0.00195091	28.6138	73969.4
	0.790063	0.00194642	28.6306	73941.2
	0.805853	0.00194392	28.6475	73917.1
	0.821642	0.0019389	28.6643	73908.3
	0.837432	0.00193387	28.6811	73897.8
	0.853221	0.00192319	28.698	73907.1
	0.869011	0.00191409	28.7148	73870.1
	0.884801	0.00190479	28.7316	73843.6
	0.90059	0.001898	28.7485	73797
	0.91638	0.00189186	28.7653	73745
	0.932169	0.00188502	28.7821	73689.2
	0.947959	0.00187072	28.799	73643
	0.963749	0.00186203	28.8158	73617.3
	0.979538	0.0018564	28.8327	73561.7
	0.995328	0.00185077	28.8495	73497.1
	1.01112	0.00184368	28.8663	73454.4
	1.02691	0.00183602	28.8832	73408.2
	1.0427	0.00183048	28.9	73366.4
	1.05849	0.00182224	28.9168	73299.9
	1.07428	0.00181627	28.9337	73252.2
	1.09007	0.00181725	28.9505	73203.6
	1.10586	0.00182429	28.9673	73139.6
	1.12164	0.00183134	28.9842	73068.3
	1.13743	0.00183199	29.001	72996.1
	1.15322	0.00182918	29.0178	72927.2
	1.16901	0.00182463	29.0347	72853.3
	1.1848	0.00182008	29.0515	72768.9
	1.20059	0.0018112	29.0683	72686.6
	1.21638	0.00180663	29.0852	72610.1
	1.23217	0.00179543	29.102	72556
	1.24796	0.00178338	29.1188	72464.6
	1.26375	0.00177204	29.1357	72343
	1.27954	0.00176376	29.1525	72256.3
	1.29533	0.00176945	29.1693	72160.3
	1.31112	0.00176544	29.1862	72066.1
	1.32691	0.00176651	29.203	71956.1
	1.3427	0.00176558	29.2198	71842.9
	1.35849	0.00176138	29.2367	71740.1
	1.37428	0.00175686	29.2535	71629.3
	1.39007	0.00175234	29.2703	71512.1
	1.40586	0.00174799	29.2872	71390.5
	1.42165	0.00174761	29.304	71279.2
	1.43744	0.00174066	29.3209	71187.5
	1.45323	0.00173372	29.3377	71069.9
	1.46902	0.00171234	29.3545	70946.9
	1.48481	0.00170344	29.3714	70830.7
	1.5006	0.00169454	29.3882	70725.2
	1.51638	0.00168014	29.405	70619.3
	1.53217	0.00167058	29.4219	70526.6
	1.54796	0.00167118	29.4387	70421.5
	1.56375	0.00167766	29.4555	70344
	1.57954	0.00167354	29.4724	70252.2
	1.59533	0.00166886	29.4892	70143.1
	1.61112	0.00166419	29.506	70024.4
	1.62691	0.00165658	29.5229	69927.9
	1.6427	0.00164876	29.5397	69846.2
	1.65849	0.00163997	29.5565	69756.4
	1.67428	0.0016343	29.5734	69620.6
	1.69007	0.00162711	29.5902	69504.3
	1.70586	0.00161854	29.607	69380.9
	1.72165	0.00160987	29.6239	69252.5
	1.73744	0.00160111	29.6407	69134.6
	1.75323	0.00159604	29.6575	69038.1
	1.76902	0.00159158	29.6744	68939.6
	1.78481	0.0015835	29.6912	68827.4
	1.8006	0.00157425	29.708	68695.3
	1.81639	0.00156824	29.7249	68570
	1.83218	0.00156129	29.7417	68454.4
	1.84797	0.00155231	29.7586	68352.1
	1.86376	0.00154313	29.7754	68299.5
	1.87955	0.00153588	29.7922	68247
	1.89534	0.00153107	29.8091	68147.7
	1.91112	0.00152625	29.8259	68052.3
	1.92691	0.001516	29.8427	67935.9
	1.9427	0.00150832	29.8596	67809.3
	1.95849	0.00150215	29.8764	67683.7
	1.97428	0.00149473	29.8932	67568.3
	1.99007	0.0014863	29.9101	67456.8
	2.00586	0.00147781	29.9269	67360.9
	2.02165	0.00147134	29.9437	67275.2
	2.03744	0.00146625	29.9606	67240.3
	2.05323	0.00146073	29.9774	67144.9
	2.06902	0.00145521	29.9942	67006.1
	2.08481	0.00144663	30.0111	66894.4
	2.1006	0.00143805	30.0279	66786.8
	2.11639	0.00142974	30.0447	66683.9
	2.13218	0.00142174	30.0616	66578.9
	2.14797	0.00141316	30.0784	66543.2
	2.16376	0.00140752	30.0952	66451.5
	2.17955	0.00140268	30.1121	66349.7
	2.19534	0.00139434	30.1289	66238.6
	2.21113	0.00138804	30.1457	66165.3
	2.22692	0.00138288	30.1626	66120.3
	2.24271	0.00137502	30.1794	66000.3
	2.2585	0.00136723	30.1962	65872
	2.27429	0.00135757	30.2131	65756.6
	2.29008	0.00134742	30.2299	65680.1
	2.30586	0.00134174	30.2468	65595.6
	2.32165	0.00132951	30.2636	65458.2
	2.33744	0.00132444	30.2804	65335.4
	2.35323	0.0013272	30.2973	65212.2
	2.36902	0.00132537	30.3141	65113.5
	2.38481	0.00131203	30.3309	65059
	2.4006	0.0012987	30.3478	64962.8
	2.41639	0.00128223	30.3646	64881.5
	2.43218	0.00127524	30.3814	64817
	2.44797	0.00126904	30.3983	64716.4
	2.46376	0.00126183	30.4151	64601.7
	2.47955	0.00124513	30.4319	64525.6
	2.49534	0.00124032	30.4488	64441.4
	2.51113	0.00123628	30.4656	64329.2
	2.52692	0.00123087	30.4824	64230.6
	2.54271	0.00122546	30.4993	64162.4
	2.5585	0.00121651	30.5161	64103.5
	2.57429	0.00120804	30.5329	64000.9
	2.59008	0.00120084	30.5498	63920.5
	2.60587	0.00119658	31.5935	51052
	2.62166	0.00119186	31.6104	50801.8
	2.63745	0.00118714	31.6272	50548.7
	2.65324	0.0011786	31.644	50305.2
	2.66903	0.00117101	31.6609	50059.7
	2.68482	0.00116342	31.6777	49830.5
	2.7006	0.00115112	31.6945	49613.8
	2.71639	0.00114158	31.7114	49421.7
	2.73218	0.00113715	31.7282	49232.3
	2.74797	0.00113273	31.745	49033.8
	2.76376	0.00112694	31.7619	48851.3
	2.77955	0.00111769	31.7787	48679.4
	2.79534	0.00110951	31.7955	48489.8
	2.81113	0.00110166	31.8124	48331.6
	2.82692	0.00109389	31.8292	48142.3
	2.84271	0.00108832	31.846	47982.8
	2.8585	0.00108235	31.8629	47820.9
	2.87429	0.00107619	31.8797	47656.4
	2.89008	0.00106929	31.8965	47503.8
	2.90587	0.0010621	31.9134	47433.2
	2.92166	0.00105451	31.9302	47308.2
	2.93745	0.00104863	31.947	47166.2
	2.95324	0.00104196	31.9639	47027
	2.96903	0.00103598	31.9807	46905.4
	2.98482	0.00102788	31.9975	46839.6
	3.00061	0.00101915	32.0144	46745.3
	3.0164	0.00101407	32.0312	46663.3
	3.03219	0.00101112	32.0481	46593.8
	3.04798	0.00101217	32.0649	46530.8
	3.06377	0.00101079	32.0817	46526.5
	3.07956	0.00100941	32.0986	46476
	3.09534	0.00100598	32.1154	46429
	3.11113	0.0010017	32.1322	46347.2
	3.12692	0.00099724	32.1491	46245.3
	3.14271	0.000992785	32.1659	46139.4
	3.1585	0.000980428	32.1827	46093.8
	3.17429	0.000966042	32.1996	46035.3
	3.19008	0.000961098	32.2164	45839.3
	3.20587	0.000956154
	3.22166	0.000941858
	3.23745	0.000934783
	3.25324	0.000927189
	3.26903	0.000919258
	3.28482	0.000915655
	3.30061	0.000912402
	3.3164	0.000907653
	3.33219	0.000902903
	3.34798	0.000897728
	3.36377	0.000890087
	3.37956	0.000883061
	3.39535	0.000878192
	3.41114	0.000873323
	3.42693	0.000867831
	3.44272	0.000863386
	3.45851	0.00085675
	3.4743	0.000851159
	3.49008	0.000846449
	3.50587	0.000840095
	3.52166	0.00083497
	3.53745	0.000830577
	3.55324	0.000824983
	3.56903	0.000820396
	3.58482	0.000815499
	3.60061	0.000809995
	3.6164	0.000803542
	3.63219	0.000798453
	3.64798	0.000793749
	3.66377	0.000789045
	3.67956	0.000783981
	3.69535	0.000775056
	3.71114	0.000769867
	3.72693	0.000766517
	3.74272	0.000762526
	3.75851	0.000758335
	3.7743	0.000753472
	3.79009	0.000748608
	3.80588	0.0007432
	3.82167	0.000734075
	3.83746	0.000726786
	3.85325	0.000725668
	3.86904	0.00072134
	3.88482	0.000716703
	3.90061	0.000712066
	3.9164	0.00070762
	3.93219	0.000703173
	3.94798	0.000695511
	3.96377	0.000689011
	3.97956	0.000685613
	3.99535	0.000682325
	4.01114	0.000678036
	4.02693	0.000673606
	4.04272	0.000669176
	4.05851	0.000663459
	4.0743	0.000656606
	4.09009	0.000649993
	4.10588	0.00064412
	4.12167	0.000639976
	4.13746	0.000635419
	4.15325	0.000630862
	4.16904	0.000625991
	4.18483	0.000618598
	4.20062	0.000614106
	4.21641	0.000609669
	4.2322	0.000605232
	4.24799	0.00059913
	4.26378	0.000593424
	4.27956	0.000589355
	4.29535	0.000586705
	4.31114	0.000582986
	4.32693	0.000579147
	4.34272	0.000574975
	4.35851	0.000569209
	4.3743	0.000563443
	4.39009	0.000557664
	4.40588	0.000552957
	4.42167	0.000550073
	4.43746	0.000545965
	4.45325	0.000542834
	4.46904	0.00053828
	4.48483	0.000533727
	4.50062	0.000528488
	4.51641	0.00052116
	4.5322	0.000515467
	4.54799	0.000515026
	4.56378	0.000510724
	4.57957	0.000506422
	4.59536	0.000502077
	4.61115	0.000498019
	4.62694	0.000493962
	4.64273	0.00049079
	4.65852	0.000487204
	4.6743	0.000482918
	4.69009	0.000478633
	4.70588	0.000477322
	4.72167	0.000473123
	4.73746	0.000469077
	4.75325	0.00046734
	4.76904	0.000463887
	4.78483	0.000459773
	4.80062	0.000455433
	4.81641	0.000451093
	4.8322	0.000447338
	4.84799	0.000445892
	4.86378	0.000444245
	4.87957	0.00044015
	4.89536	0.000437978
	4.91115	0.00043428
	4.92694	0.000430582
	4.94273	0.000426451
	4.95852	0.000422617
	4.97431	0.000419266
	4.9901	0.000418255
	5.00589	0.00041859
	5.02168	0.000414325
	5.03747	0.00041006
	5.05326	0.000407407
	5.06905	0.000403404
	5.08483	0.000399401
	5.10062	0.000395397
	5.11641	0.000396156
	5.1322	0.000394015
	5.14799	0.000390733
	5.16378	0.000387451
	5.17957	0.000384044
	5.19536	0.000380209
	5.21115	0.000376374
	5.22694	0.000373581
	5.24273	0.000371101
	5.25852	0.000368931
	5.27431	0.000365475
	5.2901	0.000361155
	5.30589	0.000356665
	5.32168	0.000352176
	5.33747	0.000348878
	5.35326	0.000344897
	5.36905	0.000340916
	5.38484	0.000337943
	5.40063	0.000333371
	5.41642	0.0003288
	5.43221	0.000323959
	5.448	0.000321318
	5.46379	0.000318761
	5.47957	0.00031525
	5.49536	0.000311261
	5.51115	0.000306304
	5.52694	0.000301347
	5.54273	0.000298999
	5.55852	0.000296246
	5.57431	0.000291833
	5.5901	0.000287421
	5.60589	0.000282547
	5.62168	0.000278181
	5.63747	0.000273816
	5.65326	0.0002693
	5.66905	0.000265628
	5.68484	0.000266465
	5.70063	0.000262987
	5.71642	0.000258951
	5.73221	0.000254532
	5.748	0.000250113
	5.76379	0.000245636
	5.77958	0.000241159
	5.79537	0.000238748
	5.81116	0.00023617
	5.82695	0.00023341
	5.84274	0.000229732
	5.85853	0.000226054
	5.87431	0.000223918
	5.8901	0.00022076
	5.90589	0.000216825
	5.92168	0.000213867
	5.93747	0.000210839
	5.95326	0.000207572
	5.96905	0.000205313
	5.98484	0.000202426
	6.00063	0.000198244
	6.01642	0.000195209
	6.03221	0.000194177
	6.048	0.000191024
	6.06379	0.000187118
	6.07958	0.000184999
	6.09537	0.000181346
	6.11116	0.000177694
	6.12695	0.000175719
	6.14274	0.000175331
	6.15853	0.000172317
	6.17432	0.000170551
	6.19011	0.00016712
	6.2059	0.000163142
	6.22169	0.000159163
	6.23748	0.00015839
	6.25327	0.000158475
	6.26905	0.000154422
	6.28484	0.000150369
	6.30063	0.000146982
	6.31642	0.000142661
	6.33221	0.000138247
	6.348	0.000133833
	6.36379	0.000133346
	6.37958	0.000134902
	6.39537	0.000132142
	6.41116	0.000129381
	6.42695	0.000125698
	6.44274	0.000123852
	6.45853	0.00012167
	6.47432	0.000119125
	6.49011	0.000114845
	6.5059	0.000110703
	6.52169	0.000109678
	6.53748	0.00010592
	6.55327	0.000102594
	6.56906	9.92687e-05
	6.58485	9.72472e-05
	6.60064	9.48948e-05
	6.61643	9.15102e-05
	6.63222	8.81257e-05
	6.64801	8.64733e-05
	6.66379	8.66434e-05
	6.67958	8.36189e-05
	6.69537	8.09554e-05
	6.71116	7.83757e-05
	6.72695	7.46573e-05
	6.74274	7.05783e-05
	6.75853	6.59121e-05
	6.77432	6.12459e-05
	6.79011	5.91254e-05
	6.8059	5.78852e-05
	6.82169	5.83307e-05
	6.83748	5.43075e-05
	6.85327	5.02844e-05
	6.86906	4.61624e-05
	6.88485	4.18809e-05
	6.90064	3.75994e-05
	6.91643	3.3903e-05
	6.93222	3.29906e-05
	6.94801	3.17414e-05
	6.9638	3.04206e-05
	6.97959	2.65974e-05
	6.99538	2.37676e-05
	7.01117	2.03225e-05
	7.02696	1.68773e-05
	7.04275	1.41724e-05
	7.05853	1.21346e-05
	7.07432	9.1375e-06
	7.09011	6.51075e-06
	7.1059	3.99674e-06
	7.12169	4.54752e-07
	7.13748	-1.96798e-06
	7.15327	-2.8334e-06
	7.16906	-3.53182e-06
	7.18485	-6.59532e-06
	7.20064	-1.07936e-05
	7.21643	-1.36978e-05
	7.23222	-1.61695e-05
	7.24801	-1.98724e-05
	7.2638	-2.28017e-05
	7.27959	-2.52312e-05
	7.29538	-2.93895e-05
	7.31117	-3.37204e-05
	7.32696	-3.80513e-05
	7.34275	-4.20728e-05
	7.35854	-4.49602e-05
	7.37433	-4.53854e-05
	7.39012	-4.73692e-05
	7.40591	-5.02083e-05
	7.4217	-5.18067e-05
	7.43749	-5.55855e-05
	7.45327	-5.93643e-05
	7.46906	-6.30697e-05
	7.48485	-6.44182e-05
	7.50064	-6.30966e-05
	7.51643	-6.47842e-05
	7.53222	-6.85887e-05
	7.54801	-7.25717e-05
	7.5638	-7.36606e-05
	7.57959	-7.75511e-05
	7.59538	-8.14417e-05
	7.61117	-8.33467e-05
	7.62696	-8.56431e-05
	7.64275	-8.57898e-05
	7.65854	-8.75793e-05
	7.67433	-9.06752e-05
	7.69012	-9.41905e-05
	7.70591	-9.70825e-05
	7.7217	-9.71131e-05
	7.73749	-0.000100811
	7.75328	-0.00010451
	7.76907	-0.000107845
	7.78486	-0.000108098
	7.80065	-0.000111396
	7.81644	-0.000112389
	7.83223	-0.000112885
	7.84801	-0.000115203
	7.8638	-0.0001183
	7.87959	-0.000122587
	7.89538	-0.000126874
	7.91117	-0.000129198
	7.92696	-0.000129132
	7.94275	-0.000130391
	7.95854	-0.000131134
	7.97433	-0.000133982
	7.99012	-0.000137625
	8.00591	-0.000140137
	8.0217	-0.000144199
	8.03749	-0.00014826
	8.05328	-0.000149799
	8.06907	-0.000147461
	8.08486	-0.000150709
	8.10065	-0.000153958
	8.11644	-0.000157357
	8.13223	-0.000158628
	8.14802	-0.000161986
	8.16381	-0.000164923
	8.1796	-0.000168123
	8.19539	-0.000170899
	8.21118	-0.000171916
	8.22697	-0.000173541
	8.24275	-0.000177668
	8.25854	-0.000180464
	8.27433	-0.00018363
	8.29012	-0.000186263
	8.30591	-0.000189577
	8.3217	-0.000192834
	8.33749	-0.000195687
	8.35328	-0.000196465
	8.36907	-0.000199787
	8.38486	-0.000203506
	8.40065	-0.000205565
	8.41644	-0.000208982
	8.43223	-0.000212994
	8.44802	-0.000217593
	8.46381	-0.000222193
	8.4796	-0.000223567
	8.49539	-0.000224806
	8.51118	-0.000225714
	8.52697	-0.000228298
	8.54276	-0.00023144
	8.55855	-0.000234455
	8.57434	-0.000237703
	8.59013	-0.000241418
	8.60592	-0.000245132
	8.62171	-0.000246332
	8.63749	-0.000247043
	8.65328	-0.000251174
	8.66907	-0.000254922
	8.68486	-0.000257734
	8.70065	-0.000259461
	8.71644	-0.000262473
	8.73223	-0.000265402
	8.74802	-0.000268556
	8.76381	-0.000272065
	8.7796	-0.000276457
	8.79539	-0.000280848
	8.81118	-0.00028556
	8.82697	-0.000288291
	8.84276	-0.0002904
	8.85855	-0.000293774
	8.87434	-0.000297148
	8.89013	-0.000301193
	8.90592	-0.000300579
	8.92171	-0.00030362
	8.9375	-0.000306662
	8.95329	-0.000307766
	8.96908	-0.000309995
	8.98487	-0.000312378
	9.00066	-0.000316697
	9.01645	-0.000321364
	9.03223	-0.000326032
	9.04802	-0.000326641
	9.06381	-0.000327735
	9.0796	-0.000330769
	9.09539	-0.000332267
	9.11118	-0.000335143
	9.12697	-0.000338787
	9.14276	-0.000342948
	9.15855	-0.000347109
	9.17434	-0.00034987
	9.19013	-0.000350328
	9.20592	-0.000350516
	9.22171	-0.000352881
	9.2375	-0.000356746
	9.25329	-0.00036011
	9.26908	-0.000364027
	9.28487	-0.000367943
	9.30066	-0.000370079
	9.31645	-0.000370381
	9.33224	-0.000371255
	9.34803	-0.000374043
	9.36382	-0.000376662
	9.37961	-0.000379547
	9.3954	-0.000382217
	9.41119	-0.000382323
	9.42698	-0.000386537
	9.44276	-0.000390751
	9.45855	-0.000391767
	9.47434	-0.000392044
	9.49013	-0.000395266
	9.50592	-0.000397376
	9.52171	-0.000398011
	9.5375	-0.000398958
	9.55329	-0.000402132
	9.56908	-0.000406208
	9.58487	-0.000410285
	9.60066	-0.000413262
	9.61645	-0.000413266
	9.63224	-0.000413406
	9.64803	-0.000414528
	9.66382	-0.000418454
	9.67961	-0.000421851
	9.6954	-0.000426434
	9.71119	-0.000431017
	9.72698	-0.000435926
	9.74277	-0.000435894
	9.75856	-0.000436073
	9.77435	-0.000440183
	9.79014	-0.000442836
	9.80593	-0.000447455
	9.82172	-0.000452074
	9.8375	-0.000457068
	9.85329	-0.000461006
	9.86908	-0.000462616
	9.88487	-0.000466893
	9.90066	-0.000471171
	9.91645	-0.000475188
	9.93224	-0.000479381
	9.94803	-0.000483719
	9.96382	-0.000488129
	9.97961	-0.000492539
	9.9954	-0.000498078
	10.0112	-0.000503846
	10.027	-0.000507627
	10.0428	-0.00051191
	10.0586	-0.000516057
	10.0743	-0.000520203
	10.0901	-0.00052428
	10.1059	-0.000528877
	10.1217	-0.000533474
	10.1375	-0.000538462
	10.1533	-0.000543622
	10.1691	-0.000548783
	10.1849	-0.000554294
	10.2007	-0.000557918
	10.2165	-0.000562049
	10.2322	-0.000567049
	10.248	-0.000572048
	10.2638	-0.00057915
	10.2796	-0.000586601
	10.2954	-0.000591918
	10.3112	-0.000593925
	10.327	-0.000598913
	10.3428	-0.0006039
	10.3586	-0.000609534
	10.3744	-0.000615789
	10.3901	-0.000623034
	10.4059	-0.000630188
	10.4217	-0.000635371
	10.4375	-0.000638957
	10.4533	-0.000643931
	10.4691	-0.000648905
	10.4849	-0.000654743
	10.5007	-0.000660385
	10.5165	-0.000667679
	10.5322	-0.000675208
	10.548	-0.000680585
	10.5638	-0.000685962
	10.5796	-0.000691769
	10.5954	-0.000696143
	10.6112	-0.000700518
	10.627	-0.000708521
	10.6428	-0.00071316
	10.6586	-0.000717603
	10.6744	-0.000722045
	10.6901	-0.000727657
	10.7059	-0.000733268
	10.7217	-0.000738386
	10.7375	-0.000743433
	10.7533	-0.000750111
	10.7691	-0.000754546
	10.7849	-0.00075898
	10.8007	-0.000763917
	10.8165	-0.000772416
	10.8322	-0.00077998
	10.848	-0.000786903
	10.8638	-0.000790269
	10.8796	-0.0007939
	10.8954	-0.000798235
	10.9112	-0.000803774
	10.927	-0.000809312
	10.9428	-0.000814945
	10.9586	-0.000823548
	10.9744	-0.000830196
	10.9901	-0.000832394
	11.0059	-0.000836028
	11.0217	-0.000840276
	11.0375	-0.000846154
	11.0533	-0.000852032
	11.0691	-0.000858214
	11.0849	-0.000865653
	11.1007	-0.000871829
	11.1165	-0.000876791
	11.1323	-0.000881733
	11.148	-0.00088661
	11.1638	-0.000891582
	11.1796	-0.000896553
	11.1954	-0.000902434
	11.2112	-0.000907778
	11.227	-0.000912808
	11.2428	-0.000917838
	11.2586	-0.000925268
	11.2744	-0.000931212
	11.2901	-0.000935707
	11.3059	-0.000940202
	11.3217	-0.000946183
	11.3375	-0.000950775
	11.3533	-0.000955367
	11.3691	-0.000961933
	11.3849	-0.000972087
	11.4007	-0.000981084
	11.4165	-0.00098539
	11.4323	-0.000987427
	11.448	-0.000991642
	11.4638	-0.000996187
	11.4796	-0.00100073
	11.4954	-0.00100797
	11.5112	-0.00101412
	11.527	-0.00102319
	11.5428	-0.00103088
	11.5586	-0.00103528
	11.5744	-0.00104028
	11.5902	-0.00104527
	11.6059	-0.00105159
	11.6217	-0.00105788
	11.6375	-0.00106348
	11.6533	-0.00107063
	11.6691	-0.00107861
	11.6849	-0.00108372
	11.7007	-0.00108881
	11.7165	-0.00109377
	11.7323	-0.0010999
	11.748	-0.00110649
	11.7638	-0.00111207
	11.7796	-0.00111748
	11.7954	-0.00112438
	11.8112	-0.00113159
	11.827	-0.00113732
	11.8428	-0.00114214
	11.8586	-0.00114821
	11.8744	-0.00115373
	11.8902	-0.00115917
	11.9059	-0.00116501
	11.9217	-0.00117116
	11.9375	-0.00117847
	11.9533	-0.00118729
	11.9691	-0.00119507
	11.9849	-0.00120094
	12.0007	-0.00120634
	12.0165	-0.00121342
	12.0323	-0.00121935
	12.048	-0.00122505
	12.0638	-0.00123353
	12.0796	-0.00124272
	12.0954	-0.00125139
	12.1112	-0.00125863
	12.127	-0.00126328
	12.1428	-0.00126793
	12.1586	-0.00127299
	12.1744	-0.00128106
	12.1902	-0.00128724
	12.2059	-0.00129428
	12.2217	-0.00130211
	12.2375	-0.00130861
	12.2533	-0.00131723
	12.2691	-0.00132355
	12.2849	-0.00133016
	12.3007	-0.00133857
	12.3165	-0.00134546
	12.3323	-0.00135353
	12.3481	-0.00135946
	12.3638	-0.00136528
	12.3796	-0.00137464
	12.3954	-0.00138252
	12.4112	-0.00138918
	12.427	-0.00139419
	12.4428	-0.00139928
	12.4586	-0.00140929
	12.4744	-0.00141493
	12.4902	-0.00142226
	12.5059	-0.00143081
	12.5217	-0.00143815
	12.5375	-0.00144747
	12.5533	-0.0014555
	12.5691	-0.00146405
	12.5849	-0.00147067
	12.6007	-0.00147668
	12.6165	-0.00148607
	12.6323	-0.00149425
	12.6481	-0.00150345
	12.6638	-0.00151327
	12.6796	-0.00152077
	12.6954	-0.00152597
	12.7112	-0.00153159
	12.727	-0.00154147
	12.7428	-0.00155075
	12.7586	-0.00155901
	12.7744	-0.00156857
	12.7902	-0.00157902
	12.8059	-0.00158875
	12.8217	-0.00159435
	12.8375	-0.00159928
	12.8533	-0.00160756
	12.8691	-0.00161724
	12.8849	-0.00162702
	12.9007	-0.00163641
	12.9165	-0.00164365
	12.9323	-0.00165072
	12.9481	-0.00166009
	12.9638	-0.00166871
	12.9796	-0.00167388
	12.9954	-0.00168156
	13.0112	-0.00169257
	13.027	-0.00170128
	13.0428	-0.00170812
	13.0586	-0.00171496
	13.0744	-0.00172402
	13.0902	-0.00173076
	13.106	-0.00173774
	13.1217	-0.00174501
	13.1375	-0.00175149
	13.1533	-0.00175866
	13.1691	-0.00176592
	13.1849	-0.0017731
	13.2007	-0.00178355
	13.2165	-0.00179287
	13.2323	-0.00180029
	13.2481	-0.00180657
	13.2638	-0.0018112
	13.2796	-0.00181666
	13.2954	-0.00182299
	13.3112	-0.00183082
	13.327	-0.00183912
	13.3428	-0.00184921
	13.3586	-0.00185903
	13.3744	-0.00186395
	13.3902	-0.00186844
	13.406	-0.00187292
	13.4217	-0.00187813
	13.4375	-0.00188904
	13.4533	-0.00189804
	13.4691	-0.00190378
	13.4849	-0.00191075
	13.5007	-0.00191911
	13.5165	-0.00192646
	13.5323	-0.0019319
	13.5481	-0.00194026
	13.5639	-0.00194635
	13.5796	-0.00195297
	13.5954	-0.00195934
	13.6112	-0.00196568
	13.627	-0.0019757
	13.6428	-0.00198282
	13.6586	-0.00198987
	13.6744	-0.00199702
	13.6902	-0.00200451
	13.706	-0.00201064
	13.7217	-0.00201638
	13.7375	-0.00202405
	13.7533	-0.00203166
	13.7691	-0.00203942
	13.7849	-0.00204722
	13.8007	-0.00205485
	13.8165	-0.00206057
	13.8323	-0.00206744
	13.8481	-0.00207422
	13.8639	-0.00208221
	13.8796	-0.00209208
	13.8954	-0.00210139
	13.9112	-0.00211036
	13.927	-0.00211877
	13.9428	-0.00212457
	13.9586	-0.00212996
	13.9744	-0.00213856
	13.9902	-0.00214877
	14.006	-0.00215765
	14.0217	-0.00216637
	14.0375	-0.0021732
	14.0533	-0.00218197
	14.0691	-0.00219064
	14.0849	-0.00219711
	14.1007	-0.0022044
	14.1165	-0.00221271
	14.1323	-0.00222391
	14.1481	-0.00223156
	14.1639	-0.00223997
	14.1796	-0.00224946
	14.1954	-0.00225845
	14.2112	-0.00226681
	14.227	-0.00227574
	14.2428	-0.00228435
	14.2586	-0.00229477
	14.2744	-0.00230347
	14.2902	-0.00230913
	14.306	-0.00231731
	14.3218	-0.00232816
	14.3375	-0.00234072
	14.3533	-0.00235059
	14.3691	-0.002357
	14.3849	-0.00236446
	14.4007	-0.00237161
	14.4165	-0.00237876
	14.4323	-0.00238886
	14.4481	-0.00240004
	14.4639	-0.0024117
	14.4796	-0.00242227
	14.4954	-0.00243056
	14.5112	-0.00243712
	14.527	-0.00244663
	14.5428	-0.0024567
	14.5586	-0.00246721
	14.5744	-0.0024782
	14.5902	-0.00248732
	14.606	-0.00249627
	14.6218	-0.00250465
	14.6375	-0.00251623
	14.6533	-0.00252735
	14.6691	-0.00253593
	14.6849	-0.00254749
	14.7007	-0.00255911
	14.7165	-0.00257037
	14.7323	-0.00257798
	14.7481	-0.00258679
	14.7639	-0.00259957
	14.7796	-0.00261159
	14.7954	-0.00261869
	14.8112	-0.00262655
	14.827	-0.00263625
	14.8428	-0.00264603
	14.8586	-0.00265499
	14.8744	-0.0026658
	14.8902	-0.00267851
	14.906	-0.00268962
	14.9218	-0.00270053
	14.9375	-0.00270894
	14.9533	-0.00271607
	14.9691	-0.00272547
	14.9849	-0.00273709
	15.0007	-0.00274831
	15.0165	-0.00275964
	15.0323	-0.00277165
	15.0481	-0.00278327
	15.0639	-0.00279197
	15.0797	-0.00279871
	15.0954	-0.00280747
	15.1112	-0.00281712
	15.127	-0.00282778
	15.1428	-0.00283848
	15.1586	-0.00285007
	15.1744	-0.0028611
	15.1902	-0.0028709
	15.206	-0.00287813
	15.2218	-0.00288555
	15.2375	-0.00289534
	15.2533	-0.00290447
	15.2691	-0.00291411
	15.2849	-0.00292534
	15.3007	-0.00293409
	15.3165	-0.00294425
	15.3323	-0.00295428
	15.3481	-0.00296209
	15.3639	-0.00297216
	15.3797	-0.00298161
	15.3954	-0.0029898
	15.4112	-0.00299911
	15.427	-0.00300845
	15.4428	-0.0030175
	15.4586	-0.00302594
	15.4744	-0.00303518
	15.4902	-0.00304267
	15.506	-0.00305003
	15.5218	-0.00305707
	15.5376	-0.00306384
	15.5533	-0.00307072
	15.5691	-0.00307894
	15.5849	-0.00308941
	15.6007	-0.00309887
	15.6165	-0.00310547
	15.6323	-0.00311102
	15.6481	-0.00311622
	15.6639	-0.00312124
	15.6797	-0.00313096
	15.6954	-0.00313956
	15.7112	-0.00314549
	15.727	-0.00315141
	15.7428	-0.00316001
	15.7586	-0.00316397
	15.7744	-0.00316868
	15.7902	-0.00317339
	15.806	-0.00317901
	15.8218	-0.0031849
	15.8376	-0.00318989
	15.8533	-0.00319543
	15.8691	-0.00319938
	15.8849	-0.00320384
	15.9007	-0.0032083
	15.9165	-0.00321317
	15.9323	-0.00321769
	15.9481	-0.00322265
	15.9639	-0.00322654
	15.9797	-0.00322922
	15.9954	-0.00323274
	16.0112	-0.00323719
	16.027	-0.00324164
	16.0428	-0.00324594
	16.0586	-0.00324761
	16.0744	-0.00324986
	16.0902	-0.00325282
	16.106	-0.00325578
	16.1218	-0.00325916
	16.1376	-0.00326259
	16.1533	-0.0032655
	16.1691	-0.00326798
	16.1849	-0.00327164
	16.2007	-0.00327076
	16.2165	-0.00327023
	16.2323	-0.00327083
	16.2481	-0.00327262
	16.2639	-0.00327322
	16.2797	-0.00327223
	16.2955	-0.00327073
	16.3112	-0.00326898
	16.327	-0.00326234
	16.3428	-0.00325439
	16.3586	-0.00324792
	16.3744	-0.00323875
	16.3902	-0.00322591
	16.406	-0.00320922
	16.4218	-0.00318718
	16.4376	-0.00316026
	16.4533	-0.00312928
	16.4691	-0.00309074
	16.4849	-0.00304448
	16.5007	-0.00299029
	16.5165	-0.00293099
	16.5323	-0.0028625
	16.5481	-0.00278167
	16.5639	-0.00269354
	16.5797	-0.00259624
	16.5955	-0.00249336
	16.6112	-0.00238303
	16.627	-0.00226396
	16.6428	-0.00213351
	16.6586	-0.00199789
	16.6744	-0.00185987
	16.6902	-0.00171959
	16.706	-0.00157439
	16.7218	-0.00142753
	16.7376	-0.00128047
	16.7534	-0.00112862
	16.7691	-0.000973655
	16.7849	-0.000821686
	16.8007	-0.000674774
	16.8165	-0.000533301
	16.8323	-0.000394355
	16.8481	-0.000254176
	16.8639	-0.000121917
	16.8797	5.41181e-06
	16.8955	0.000132202
	16.9112	0.000252225
	16.927	0.000365017
	16.9428	0.000467883
	16.9586	0.000563168
	16.9744	0.000651137
	16.9902	0.000733451
	17.006	0.000810406
	17.0218	0.000878361
	17.0376	0.0009379
	17.0534	0.000988867
	17.0691	0.00103066
	17.0849	0.00106254
	17.1007	0.0010886
	17.1165	0.00110957
	17.1323	0.00112255
	17.1481	0.00112115
	17.1639	0.00111754
	17.1797	0.00110898
	17.1955	0.00110043
	17.2112	0.00108313
	17.227	0.00106071
	17.2428	0.00103146
	17.2586	0.000997766
	17.2744	0.000959279
	17.2902	0.000916399
	17.306	0.000874357
	17.3218	0.000831343
	17.3376	0.000782609
	17.3534	0.000733372
	17.3691	0.000681331
	17.3849	0.000625948
	17.4007	0.000568019
	17.4165	0.000508597
	17.4323	0.000449525
	17.4481	0.000393051
	17.4639	0.000336079
	17.4797	0.000277104
	17.4955	0.00021556
	17.5113	0.00015565
	17.527	9.65419e-05
	17.5428	3.51053e-05
	17.5586	-2.34931e-05
	17.5744	-7.99469e-05
	17.5902	-0.000136593
	17.606	-0.000192416
	17.6218	-0.000248941
	17.6376	-0.000306894
	17.6534	-0.000363267
	17.6691	-0.000416935
	17.6849	-0.000470565
	17.7007	-0.000526235
	17.7165	-0.000583832
	17.7323	-0.000636168
	17.7481	-0.000685419
	17.7639	-0.000739098
	17.7797	-0.000792407
	17.7955	-0.000843704
	17.8113	-0.000894818
	17.827	-0.000945488
	17.8428	-0.000997357
	17.8586	-0.00105097
	17.8744	-0.00110037
	17.8902	-0.00114534
	17.906	-0.0011913
	17.9218	-0.00123933
	17.9376	-0.00128593
	17.9534	-0.00133276
	17.9691	-0.00137986
	17.9849	-0.00142566
	18.0007	-0.00146716
	18.0165	-0.00150434
	18.0323	-0.00154253
	18.0481	-0.0015823
	18.0639	-0.00161996
	18.0797	-0.00165876
	18.0955	-0.00169642
	18.1113	-0.00173235
	18.127	-0.00176703
	18.1428	-0.00179783
	18.1586	-0.00182603
	18.1744	-0.0018565
	18.1902	-0.00188685
	18.206	-0.00191572
	18.2218	-0.0019441
	18.2376	-0.00197034
	18.2534	-0.00199658
	18.2692	-0.00202322
	18.2849	-0.00204665
	18.3007	-0.0020672
	18.3165	-0.00208971
	18.3323	-0.00211199
	18.3481	-0.00212935
	18.3639	-0.00214763
	18.3797	-0.00216857
	18.3955	-0.00218648
	18.4113	-0.00220628
	18.427	-0.00222541
	18.4428	-0.00224138
	18.4586	-0.00225338
	18.4744	-0.00226601
	18.4902	-0.00228046
	18.506	-0.00229264
	18.5218	-0.00230514
	18.5376	-0.00231758
	18.5534	-0.00233159
	18.5692	-0.00234291
	18.5849	-0.00234964
	18.6007	-0.00235689
	18.6165	-0.00236824
	18.6323	-0.00237848
	18.6481	-0.00238885
	18.6639	-0.00240106
	18.6797	-0.00240896
	18.6955	-0.00241504
	18.7113	-0.0024194
	18.7271	-0.00242377
	18.7428	-0.00243058
	18.7586	-0.002438
	18.7744	-0.00244348
	18.7902	-0.00244889
	18.806	-0.0024542
	18.8218	-0.00246182
	18.8376	-0.00246738
	18.8534	-0.00246937
	18.8692	-0.00247381
	18.8849	-0.00247825
	18.9007	-0.00248282
	18.9165	-0.00248393
	18.9323	-0.00248813
	18.9481	-0.00249253
	18.9639	-0.00249693
	18.9797	-0.00250066
	18.9955	-0.00250245
	19.0113	-0.00250501
	19.0271	-0.00250765
	19.0428	-0.00251016
	19.0586	-0.00251448
	19.0744	-0.00251867
	19.0902	-0.00252122
	19.106	-0.00252426
	19.1218	-0.00252733
	19.1376	-0.00252728
	19.1534	-0.0025275
	19.1692	-0.00253177
	19.1849	-0.00253479
	19.2007	-0.00253577
	19.2165	-0.00253928
	19.2323	-0.00254315
	19.2481	-0.00254631
	19.2639	-0.00254633
	19.2797	-0.00254729
	19.2955	-0.00255002
	19.3113	-0.00255169
	19.3271	-0.00255288
	19.3428	-0.00255617
	19.3586	-0.00255806
	19.3744	-0.00255981
	19.3902	-0.00256281
	19.406	-0.00256239
	19.4218	-0.00256251
	19.4376	-0.00256431
	19.4534	-0.00256547
	19.4692	-0.00256778
	19.485	-0.00256697
	19.5007	-0.00256605
	19.5165	-0.00256729
	19.5323	-0.00257003
	19.5481	-0.00257098
	19.5639	-0.00256875
	19.5797	-0.00256794
	19.5955	-0.00256739
	19.6113	-0.00256727
	19.6271	-0.00256552
	19.6428	-0.00256356
	19.6586	-0.00256511
	19.6744	-0.00256424
	19.6902	-0.00256219
	19.706	-0.00255663
	19.7218	-0.00255085
	19.7376	-0.00254909
	19.7534	-0.00254596
	19.7692	-0.00254155
	19.785	-0.00253835
	19.8007	-0.00253312
	19.8165	-0.00253015
	19.8323	-0.00252254
	19.8481	-0.00251446
	19.8639	-0.00250883
	19.8797	-0.0025026
	19.8955	-0.00249515
	19.9113	-0.00248752
	19.9271	-0.00247762
	19.9428	-0.00246464
	19.9586	-0.00245774
	19.9744	-0.00244718
	19.9902	-0.00243222
	20.006	-0.00242032
	20.0218	-0.00240853
	20.0376	-0.00239476
	20.0534	-0.00237689
	20.0692	-0.00236205
	20.085	-0.00235033
	20.1007	-0.00233451
	20.1165	-0.00231685
	20.1323	-0.00229535
	20.1481	-0.00227453
	20.1639	-0.00225251
	20.1797	-0.0022304
	20.1955	-0.00220818
	20.2113	-0.00218502
	20.2271	-0.00216071
	20.2429	-0.002136
	20.2586	-0.00210716
	20.2744	-0.00207527
	20.2902	-0.00204436
	20.306	-0.00201238
	20.3218	-0.00198046
	20.3376	-0.00194782
	20.3534	-0.00191377
	20.3692	-0.00187971
	20.385	-0.00183992
	20.4007	-0.001797
	20.4165	-0.00175236
	20.4323	-0.00170871
	20.4481	-0.00166655
	20.4639	-0.00161978
	20.4797	-0.00157071
	20.4955	-0.0015192
	20.5113	-0.00146576
	20.5271	-0.00141118
	20.5429	-0.00134929
	20.5586	-0.00128673
	20.5744	-0.00122581
	20.5902	-0.00116022
	20.606	-0.00108959
	20.6218	-0.00101712
	20.6376	-0.000943436
	20.6534	-0.000866774
	20.6692	-0.000786893
	20.685	-0.000701397
	20.7008	-0.000610899
	20.7165	-0.000518998
	20.7323	-0.000423088
	20.7481	-0.000325239
	20.7639	-0.000223553
	20.7797	-0.000117042
	20.7955	-6.83835e-06
	20.8113	0.000107423
	20.8271	0.00023045
	20.8429	0.000356451
	20.8586	0.000483686
	20.8744	0.000613068
	20.8902	0.000746336
	20.906	0.000885104
	20.9218	0.00102766
	20.9376	0.00117538
	20.9534	0.0013323
	20.9692	0.00149331
	20.985	0.00165623
	21.0008	0.00182106
	21.0165	0.00198483
	21.0323	0.0021566
	21.0481	0.00233319
	21.0639	0.00251216
	21.0797	0.00269467
	21.0955	0.00288048
	21.1113	0.00306916
	21.1271	0.0032595
	21.1429	0.00344943
	21.1586	0.00363919
	21.1744	0.0038323
	21.1902	0.00402651
	21.206	0.00422118
	21.2218	0.00441644
	21.2376	0.00461316
	21.2534	0.00480953
	21.2692	0.00500799
	21.285	0.00520101
	21.3008	0.00538922
	21.3165	0.00557719
	21.3323	0.00576122
	21.3481	0.00594336
	21.3639	0.00612311
	21.3797	0.00630169
	21.3955	0.00647908
	21.4113	0.00665307
	21.4271	0.00681384
	21.4429	0.00696819
	21.4587	0.00712015
	21.4744	0.0072675
	21.4902	0.00740837
	21.506	0.00754325
	21.5218	0.00767503
	21.5376	0.00779896
	21.5534	0.00791459
	21.5692	0.00802032
	21.585	0.0081208
	21.6008	0.00821344
	21.6165	0.00829986
	21.6323	0.00838
	21.6481	0.00845265
	21.6639	0.00851801
	21.6797	0.00857315
	21.6955	0.00862031
	21.7113	0.00866238
	21.7271	0.00869796
	21.7429	0.00872633
	21.7587	0.00874612
	21.7744	0.00875622
	21.7902	0.00876239
	21.806	0.00875791
	21.8218	0.00875344
	21.8376	0.00874725
	21.8534	0.00872993
	21.8692	0.00870358
	21.885	0.00867152
	21.9008	0.00863513
	21.9165	0.00859456
	21.9323	0.00854792
	21.9481	0.00849989
	21.9639	0.0084503
	21.9797	0.00839568
	21.9955	0.00833504
	22.0113	0.00827171
	22.0271	0.00820465
	22.0429	0.00813328
	22.0587	0.00806197
	22.0744	0.00799241
	22.0902	0.0079214
	22.106	0.00784727
	22.1218	0.00777012
	22.1376	0.00769294
	22.1534	0.00761457
	22.1692	0.00753665
	22.185	0.00745959
	22.2008	0.00738056
	22.2166	0.0073045
	22.2323	0.00722712
	22.2481	0.00714879
	22.2639	0.00707284
	22.2797	0.0069972
	22.2955	0.00692449
	22.3113	0.00685085
	22.3271	0.00677905
	22.3429	0.00670822
	22.3587	0.00664065
	22.3744	0.00657723
	22.3902	0.00651033
	22.406	0.00644628
	22.4218	0.00638696
	22.4376	0.00632864
	22.4534	0.00627082
	22.4692	0.00621501
	22.485	0.00616062
	22.5008	0.00611182
	22.5166	0.00606716
	22.5323	0.00602326
	22.5481	0.00598227
	22.5639	0.0059446
	22.5797	0.00590812
	22.5955	0.00587119
	22.6113	0.00583756
	22.6271	0.00581148
	22.6429	0.00578973
	22.6587	0.0057706
	22.6745	0.00575282
	22.6902	0.00573718
	22.706	0.00572343
	22.7218	0.00571428
	22.7376	0.005709
	22.7534	0.00570877
	22.7692	0.00571515
	22.785	0.00572817
	22.8008	0.00574296
	22.8166	0.005758
	22.8323	0.00577441
	22.8481	0.00579861
	22.8639	0.00582833
	22.8797	0.00586401
	22.8955	0.00590313
	22.9113	0.00594534
	22.9271	0.00599819
	22.9429	0.00605684
	22.9587	0.00611703
	22.9745	0.00618
	22.9902	0.00624783
	23.006	0.00632182
	23.0218	0.00640223
	23.0376	0.00648656
	23.0534	0.00657496
	23.0692	0.00667597
	23.085	0.00678102
	23.1008	0.00688941
	23.1166	0.00699997
	23.1323	0.00711572
	23.1481	0.00723891
	23.1639	0.00736751
	23.1797	0.0074983
	23.1955	0.00763584
	23.2113	0.00778468
	23.2271	0.00793614
	23.2429	0.00808942
	23.2587	0.00824362
	23.2745	0.00840383
	23.2902	0.00856682
	23.306	0.00873174
	23.3218	0.00890439
	23.3376	0.00908252
	23.3534	0.00926706
	23.3692	0.00945331
	23.385	0.00963783
	23.4008	0.00982193
	23.4166	0.0100109
	23.4324	0.0102051
	23.4481	0.0103981
	23.4639	0.0105916
	23.4797	0.0107891
	23.4955	0.0109874
	23.5113	0.0111844
	23.5271	0.0113793
	23.5429	0.0115722
	23.5587	0.0117663
	23.5745	0.0119573
	23.5902	0.0121458
	23.606	0.0123319
	23.6218	0.012519
	23.6376	0.0127141
	23.6534	0.0129177
	23.6692	0.0131035
	23.685	0.0132744
	23.7008	0.0134416
	23.7166	0.0136014
	23.7324	0.0137575
	23.7481	0.0139093
	23.7639	0.0140605
	23.7797	0.0142082
	23.7955	0.0143452
	23.8113	0.0144736
	23.8271	0.0145945
	23.8429	0.0147105
	23.8587	0.01482
	23.8745	0.0149244
	23.8902	0.0150264
	23.906	0.0151219
	23.9218	0.0152085
	23.9376	0.0152875
	23.9534	0.0153579
	23.9692	0.0154213
	23.985	0.0154772
	24.0008	0.0155308
	24.0166	0.0155785
	24.0324	0.0156174
	24.0481	0.0156545
	24.0639	0.0156843
	24.0797	0.0157062
	24.0955	0.0157231
	24.1113	0.0157369
	24.1271	0.0157473
	24.1429	0.0157481
	24.1587	0.0157458
	24.1745	0.0157426
	24.1903	0.0157385
	24.206	0.0157318
	24.2218	0.0157251
	24.2376	0.0157165
	24.2534	0.0157039
	24.2692	0.0156894
	24.285	0.0156756
	24.3008	0.0156635
	24.3166	0.0156547
	24.3324	0.0156524
	24.3481	0.0156527
	24.3639	0.0156532
	24.3797	0.0156553
	24.3955	0.0156625
	24.4113	0.0156767
	24.4271	0.0156967
	24.4429	0.0157284
	24.4587	0.0157753
	24.4745	0.0158296
	24.4903	0.0158928
	24.506	0.0159653
	24.5218	0.0160471
	24.5376	0.0161466
	24.5534	0.0162619
	24.5692	0.0163957
	24.585	0.0165458
	24.6008	0.0167175
	24.6166	0.0169105
	24.6324	0.0171232
	24.6482	0.0173539
	24.6639	0.0176051
	24.6797	0.0178871
	24.6955	0.0181955
	24.7113	0.0185303
	24.7271	0.0188951
	24.7429	0.019294
	24.7587	0.0197287
	24.7745	0.0201973
	24.7903	0.0206933
	24.806	0.0212204
	24.8218	0.0217878
	24.8376	0.022395
	24.8534	0.0230434
	24.8692	0.0237338
	24.885	0.0244754
	24.9008	0.0252692
	24.9166	0.0261053
	24.9324	0.0269159
	24.9482	0.0277376
	24.9639	0.0286806
	24.9797	0.0296968
	24.9955	0.0307632
	25.0113	0.0318835
	25.0271	0.033063
	25.0429	0.034302
	25.0587	0.0355885
	25.0745	0.036902
	25.0903	0.0382659
	25.106	0.0396926
	25.1218	0.0411764
	25.1376	0.0427166
	25.1534	0.0443058
	25.1692	0.0459529
	25.185	0.0476661
	25.2008	0.0494164
	25.2166	0.0511833
	25.2324	0.0529943
	25.2482	0.054861
	25.2639	0.0567761
	25.2797	0.0587301
	25.2955	0.0607124
	25.3113	0.0627438
	25.3271	0.0648181
	25.3429	0.0668977
	25.3587	0.0689705
	25.3745	0.0710648
	25.3903	0.0731861
	25.4061	0.0753247
	25.4218	0.0774678
	25.4376	0.0796155
	25.4534	0.0817772
	25.4692	0.0839451
	25.485	0.0860787
	25.5008	0.0882017
	25.5166	0.0903207
	25.5324	0.0923823
	25.5482	0.0944133
	25.5639	0.0964124
	25.5797	0.0983772
	25.5955	0.100316
	25.6113	0.102248
	25.6271	0.10417
	25.6429	0.105972
	25.6587	0.10767
	25.6745	0.109317
	25.6903	0.110905
	25.7061	0.112424
	25.7218	0.113886
	25.7376	0.115318
	25.7534	0.116667
	25.7692	0.117897
	25.785	0.119039
	25.8008	0.120111
	25.8166	0.121111
	25.8324	0.122032
	25.8482	0.122873
	25.864	0.123652
	25.8797	0.124365
	25.8955	0.124985
	25.9113	0.125511
	25.9271	0.126
	25.9429	0.126411
	25.9587	0.126708
	25.9745	0.126936
	25.9903	0.127093
	26.0061	0.127133
	26.0218	0.127148
	26.0376	0.127104
	26.0534	0.127059
	26.0692	0.126892
	26.085	0.126667
	26.1008	0.126379
	26.1166	0.126007
	26.1324	0.125587
	26.1482	0.125158
	26.164	0.124682
	26.1797	0.124157
	26.1955	0.123569
	26.2113	0.122948
	26.2271	0.122306
	26.2429	0.121624
	26.2587	0.120912
	26.2745	0.120174
	26.2903	0.119405
	26.3061	0.118601
	26.3218	0.117771
	26.3376	0.116928
	26.3534	0.116061
	26.3692	0.115144
	26.385	0.114181
	26.4008	0.113224
	26.4166	0.112272
	26.4324	0.1113
	26.4482	0.110299
	26.464	0.109288
	26.4797	0.108273
	26.4955	0.107243
	26.5113	0.106195
	26.5271	0.105129
	26.5429	0.104011
	26.5587	0.102854
	26.5745	0.101716
	26.5903	0.1006
	26.6061	0.0994948
	26.6219	0.0983956
	26.6376	0.0972839
	26.6534	0.0961575
	26.6692	0.095025
	26.685	0.0938922
	26.7008	0.0927649
	26.7166	0.0916326
	26.7324	0.090487
	26.7482	0.0893498
	26.764	0.0881914
	26.7797	0.0870208
	26.7955	0.0858881
	26.8113	0.084759
	26.8271	0.0836364
	26.8429	0.0825267
	26.8587	0.0814171
	26.8745	0.0803012
	26.8903	0.0792076
	26.9061	0.0781325
	26.9219	0.07706
	26.9376	0.0759888
	26.9534	0.0749329
	26.9692	0.0738942
	26.985	0.0728696
	27.0008	0.0718563
	27.0166	0.0708519
	27.0324	0.0698716
	27.0482	0.0689193
	27.064	0.067979
	27.0797	0.0670486
	27.0955	0.066135
	27.1113	0.0652445
	27.1271	0.0643775
	27.1429	0.0635307
	27.1587	0.062697
	27.1745	0.061894
	27.1903	0.0611193
	27.2061	0.0603633
	27.2219	0.0596284
	27.2376	0.0589132
	27.2534	0.0582292
	27.2692	0.057576
	27.285	0.0569457
	27.3008	0.0563395
	27.3166	0.0557644
	27.3324	0.0552166
	27.3482	0.0546973
	27.364	0.0542075
	27.3798	0.0537493
	27.3955	0.0533308
	27.4113	0.0529497
	27.4271	0.0526001
	27.4429	0.0522886
	27.4587	0.0520215
	27.4745	0.0517962
	27.4903	0.0516166
	27.5061	0.0514862
	27.5219	0.0514123
	27.5376	0.0514014
	27.5534	0.0514579
	27.5692	0.0515815
	27.585	0.0517753
	27.6008	0.0520477
	27.6166	0.0524147
	27.6324	0.0528821
	27.6482	0.0534582
	27.664	0.0541594
	27.6798	0.0549994
	27.6955	0.0559989
	27.7113	0.0571753
	27.7271	0.0585153
	27.7429	0.0600369
	27.7587	0.0617858
	27.7745	0.0637818
	27.7903	0.0660556
	27.8061	0.0686207
	27.8219	0.0715037
	27.8377	0.0747575
	27.8534	0.0784099
	27.8692	0.0824343
	27.885	0.0868664
	27.9008	0.0917615
	27.9166	0.0971162
	27.9324	0.103048
	27.9482	0.109519
	27.964	0.116494
	27.9798	0.124125
	27.9955	0.132326
	28.0113	0.140947
	28.0271	0.150098
	28.0429	0.15986
	28.0587	0.170221
	28.0745	0.181117
	28.0903	0.192516
	28.1061	0.204581
	28.1219	0.217385
	28.1377	0.230812
	28.1534	0.244654
	28.1692	0.259044
	28.185	0.274112
	28.2008	0.289751
	28.2166	0.305853
	28.2324	0.322299
	28.2482	0.339094
	28.264	0.356385
	28.2798	0.374131
	28.2955	0.392052
	28.3113	0.410245
	28.3271	0.428938
	28.3429	0.448011
	28.3587	0.467258
	28.3745	0.486441
	28.3903	0.50557
	28.4061	0.524955
	28.4219	0.544535
	28.4377	0.564003
	28.4534	0.583502
	28.4692	0.602988
	28.485	0.622246
	28.5008	0.641229
	28.5166	0.659753
	28.5324	0.677966
	28.5482	0.696093
	28.564	0.713825
	28.5798	0.731079
	28.5956	0.747982
	28.6113	0.764453
	28.6271	0.780447
	28.6429	0.795856
	28.6587	0.810559
	28.6745	0.82466
	28.6903	0.838312
	28.7061	0.851406
	28.7219	0.86374
	28.7377	0.875495
	28.7534	0.886809
	28.7692	0.897674
	28.785	0.907991
	28.8008	0.917652
	28.8166	0.926686
	28.8324	0.935209
	28.8482	0.943194
	28.864	0.950474
	28.8798	0.95718
	28.8956	0.963377
	28.9113	0.96906
	28.9271	0.974214
	28.9429	0.978807
	28.9587	0.982872
	28.9745	0.986542
	28.9903	0.989763
	29.0061	0.992501
	29.0219	0.994811
	29.0377	0.996712
	29.0534	0.998208
	29.0692	0.999298
	29.085	0.999996
	29.1008	1
	29.1166	0.999936
	29.1324	0.999873
	29.1482	0.999131
	29.164	0.998057
	29.1798	0.996661
	29.1956	0.994963
	29.2113	0.992976
	29.2271	0.990707
	29.2429	0.988145
	29.2587	0.985296
	29.2745	0.982272
	29.2903	0.979044
	29.3061	0.975478
	29.3219	0.971639
	29.3377	0.967566
	29.3535	0.963282
	29.3692	0.958769
	29.385	0.95401
	29.4008	0.949043
	29.4166	0.94387
	29.4324	0.938499
	29.4482	0.932978
	29.464	0.927277
	29.4798	0.921373
	29.4956	0.915242
	29.5113	0.908928
	29.5271	0.902437
	29.5429	0.895733
	29.5587	0.888969
	29.5745	0.882118
	29.5903	0.875086
	29.6061	0.867932
	29.6219	0.860657
	29.6377	0.853271
	29.6535	0.845749
	29.6692	0.838035
	29.685	0.830219
	29.7008	0.822473
	29.7166	0.814618
	29.7324	0.806506
	29.7482	0.798258
	29.764	0.789876
	29.7798	0.781374
	29.7956	0.772776
	29.8114	0.764043
	29.8271	0.755191
	29.8429	0.746354
	29.8587	0.737406
	29.8745	0.728372
	29.8903	0.719324
	29.9061	0.71029
	29.9219	0.701253
	29.9377	0.692145
	29.9535	0.682967
	29.9692	0.673804
	29.985	0.664774
	30.0008	0.655713
	30.0166	0.646481
	30.0324	0.637212
	30.0482	0.627905
	30.064	0.618609
	30.0798	0.609347
	30.0956	0.59996
	30.1114	0.590622
	30.1271	0.581443
	30.1429	0.572251
	30.1587	0.563101
	30.1745	0.554021
	30.1903	0.545051
	30.2061	0.536184
	30.2219	0.52733
	30.2377	0.51849
	30.2535	0.509831
	30.2692	0.501399
	30.285	0.492991
	30.3008	0.484521
	30.3166	0.476111
	30.3324	0.467777
	30.3482	0.459528
	30.364	0.451394
	30.3798	0.443256
	30.3956	0.435253
	30.4114	0.427462
	30.4271	0.419665
	30.4429	0.41198
	30.4587	0.404466
	30.4745	0.397094
	30.4903	0.389889
	30.5061	0.382763
	30.5219	0.375729
	30.5377	0.368913
	30.5535	0.362258
	30.5693	0.355673
	30.585	0.349189
	30.6008	0.3429
	30.6166	0.33674
	30.6324	0.330632
	30.6482	0.32458
	30.664	0.318641
	30.6798	0.312905
	30.6956	0.307244
	30.7114	0.301668
	30.7271	0.296273
	30.7429	0.290992
	30.7587	0.285805
	30.7745	0.280683
	30.7903	0.275677
	30.8061	0.270786
	30.8219	0.266082
	30.8377	0.261467
	30.8535	0.256916
	30.8693	0.252564
	30.885	0.248334
	30.9008	0.244212
	30.9166	0.240226
	30.9324	0.236353
	30.9482	0.232605
	30.964	0.229023
	30.9798	0.225549
	30.9956	0.222165
	31.0114	0.218885
	31.0271	0.215731
	31.0429	0.212712
	31.0587	0.209795
	31.0745	0.206967
	31.0903	0.204274
	31.1061	0.201732
	31.1219	0.199299
	31.1377	0.196962
	31.1535	0.194732
	31.1693	0.192622
	31.185	0.190643
	31.2008	0.188777
	31.2166	0.187008
	31.2324	0.185382
[truncated: 1,799 more rows]

## Sheet: Exp3
SEC-MALS TseV3-TsiV3 Exp3	time (min)	TseV3-TsiV3 (dRI)	time (min)	TseV3-TsiV3 (Molar mass)
	-0.321576	0.00207862	25.4316	159604
	-0.305786	0.00117133	25.4485	158534
	-0.289997	0.000883574	25.4653	157593
	-0.274207	0.000871747	25.4821	157016
	-0.258417	0.00085992	25.499	156209
	-0.242628	0.00082404	25.5158	155353
	-0.226838	0.000785894	25.5326	154578
	-0.211049	0.000748694	25.5495	153903
	-0.195259	0.000710914	25.5663	153354
	-0.179469	0.000695939	25.5831	152963
	-0.16368	0.000783522	25.6	152522
	-0.14789	0.00110739	25.6168	151858
	-0.132101	0.0017513	25.6336	151279
	-0.116311	0.00269286	25.6505	150781
	-0.100521	0.00384292	25.6673	150301
	-0.0847317	0.00501718	25.6841	149928
	-0.0689421	0.00597617	25.701	149490
	-0.0531525	0.00621842	25.7178	149147
	-0.0373629	0.00630319	25.7346	148802
	-0.0215733	0.00609436	25.7515	148395
	-0.00578372	0.00588553	25.7683	147945
	0.0100059	0.0052659	25.7851	147558
	0.0257955	0.0046156	25.802	147270
	0.0415851	0.00401993	25.8188	146968
	0.0573747	0.00352402	25.8356	146668
	0.0731643	0.00308812	25.8525	146343
	0.0889539	0.00272021	25.8693	145967
	0.104743	0.00242188	25.8862	145680
	0.120533	0.00216617	25.903	145451
	0.136323	0.00195816	25.9198	145359
	0.152112	0.00176906	25.9367	145118
	0.167902	0.00158261	25.9535	144790
	0.183692	0.00140631	25.9703	144614
	0.199481	0.00124003	25.9872	144431
	0.215271	0.00108296	26.004	144241
	0.23106	0.00093528	26.0208	144003
	0.24685	0.000800003	26.0377	143798
	0.26264	0.000676817	26.0545	143562
	0.278429	0.000559901	26.0713	143255
	0.294219	0.000456694	26.0882	143018
	0.310008	0.000366552	26.105	142856
	0.325798	0.000289412	26.1218	142781
	0.341588	0.000224939	26.1387	142579
	0.357377	0.00016795	26.1555	142420
	0.373167	0.000117059	26.1723	142164
	0.388956	7.06049e-05	26.1892	141953
	0.404746	2.96759e-05	26.206	141673
	0.420536	-4.76169e-06	26.2228	141329
	0.436325	-3.48811e-05	26.2397	141067
	0.452115	-5.95441e-05	26.2565	140824
	0.467904	-7.9263e-05	26.2733	140585
	0.483694	-9.46458e-05	26.2902	140254
	0.499484	-0.000105453	26.307	139984
	0.515273	-0.000116669	26.3239	139675
	0.531063	-0.000128613	26.3407	139399
	0.546852	-0.000137227	26.3575	139312
	0.562642	-0.00014352	26.3744	139132
	0.578432	-0.000148171	26.3912	138947
	0.594221	-0.000154419	26.408	138689
	0.610011	-0.000158368	26.4249	138376
	0.6258	-0.000157197	26.4417	138065
	0.64159	-0.000158116	26.4585	137839
	0.65738	-0.000159035	26.4754	137549
	0.673169	-0.00015996	26.4922	137306
	0.688959	-0.000160342	26.509	137126
	0.704748	-0.000159313	26.5259	136985
	0.720538	-0.000161082	26.5427	136774
	0.736328	-0.000162851	26.5595	136488
	0.752117	-0.000160424	26.5764	136310
	0.767907	-0.000155666	26.5932	136171
	0.783696	-0.000153728	26.61	135920
	0.799486	-0.000151633	26.6269	135775
	0.815276	-0.000151053	26.6437	135651
	0.831065	-0.000151244	29.0342	66546.1
	0.846855	-0.000151531	29.051	66491.2
	0.862644	-0.000152321	29.0679	66447.3
	0.878434	-0.000153752	29.0847	66403.8
	0.894224	-0.000149338	29.1016	66367.5
	0.910013	-0.000143748	29.1184	66358.9
	0.925803	-0.000140779	29.1352	66365.7
	0.941592	-0.000139315	29.1521	66347.6
	0.957382	-0.000138896	29.1689	66311.5
	0.973172	-0.000138832	29.1857	66295.2
	0.988961	-0.000137295	29.2026	66297.6
	1.00475	-0.000136906	29.2194	66302.2
	1.02054	-0.000137587	29.2362	66292.1
	1.03633	-0.000134406	29.2531	66277.7
	1.05212	-0.000130883	29.2699	66284
	1.06791	-0.00012954	29.2867	66291.6
	1.0837	-0.000128489	29.3036	66302.2
	1.09949	-0.000126793	29.3204	66343.4
	1.11528	-0.000125336	29.3372	66418.1
	1.13107	-0.000126559	29.3541	66405.9
	1.14686	-0.000128015	29.3709	66384.3
	1.16265	-0.000128554	29.3877	66347.1
	1.17844	-0.000125346	29.4046	66308.1
	1.19423	-0.000121585	29.4214	66290.7
	1.21002	-0.000121445	29.4382	66280
	1.22581	-0.000120935	29.4551	66265.6
	1.24159	-0.000118574	29.4719	66251.9
	1.25738	-0.000119434	29.4887	66247
	1.27317	-0.000120294	29.5056	66227.6
	1.28896	-0.000120617	29.5224	66197
	1.30475	-0.000119622	29.5393	66171.9
	1.32054	-0.000117901	29.5561	66147
	1.33633	-0.000116418	29.5729	66109.4
	1.35212	-0.000114724	29.5898	66094.4
	1.36791	-0.000113362	29.6066	66072
	1.3837	-0.000113772	29.6234	66020.7
	1.39949	-0.000114933	29.6403	65936.6
	1.41528	-0.000116094	29.6571	65873.2
	1.43107	-0.000116329	29.6739	65832.8
	1.44686	-0.000114571	29.6908	65778.1
	1.46265	-0.000110309	29.7076	65701.3
	1.47844	-0.000107887	29.7244	65631.7
	1.49423	-0.000107339	29.7413	65550.8
	1.51002	-0.000106007	29.7581	65478.1
	1.52581	-0.000105898	29.7749	65405.8
	1.5416	-0.000107656	29.7918	65325
	1.55739	-0.000108981	29.8086	65249.4
	1.57318	-0.000110498	29.8254	65179.8
	1.58897	-0.000108722	29.8423	65101.1
	1.60476	-0.000105773	29.8591	65040.4
	1.62055	-0.000103574	29.8759	64972.3
	1.63633	-0.000103718	29.8928	64905.6
	1.65212	-0.000105669	29.9096	64810.5
	1.66791	-0.000107619	29.9264	64750
	1.6837	-0.000110117	29.9433	64684.4
	1.69949	-0.000112733	29.9601	64606.2
	1.71528	-0.000113775	29.977	64509.8
	1.73107	-0.00011187	29.9938	64422.7
	1.74686	-0.000108457	30.0106	64352.8
	1.76265	-0.000106111	30.0275	64280.7
	1.77844	-0.000105313	30.0443	64179.8
	1.79423	-0.000103967	30.0611	64091.2
	1.81002	-0.000102281	30.078	64023.1
	1.82581	-0.000103076	30.0948	63955.5
	1.8416	-0.00010387	30.1116	63949.6
	1.85739	-0.000105364	30.1285	63882.1
	1.87318	-0.000104047	30.1453	63806
	1.88897	-0.000102418	30.1621	63722.3
	1.90476	-0.000101821	30.179	63622.7
	1.92055	-0.000101102	30.1958	63520.8
	1.93634	-0.00010166	30.2126	63412.8
	1.95213	-0.000102219	30.2295	63341.5
	1.96792	-0.000103816	30.2463	63287.7
	1.98371	-0.000105629	30.2631	63215.8
	1.9995	-0.000107442	30.28	63112.9
	2.01529	-0.000105201	30.2968	63022.2
	2.03107	-0.000100935	30.3136	62924.6
	2.04686	-9.74138e-05	30.3305	62400.6
	2.06265	-9.62884e-05	31.6604	50451.2
	2.07844	-9.77092e-05	31.6772	50229.6
	2.09423	-9.91299e-05	31.6941	50062.6
	2.11002	-0.000100368	31.7109	49895.9
	2.12581	-0.00010074	31.7277	49695.3
	2.1416	-0.00010158	31.7446	49526.5
	2.15739	-9.9747e-05	31.7614	49310.8
	2.17318	-9.79658e-05	31.7782	49150.2
	2.18897	-9.57106e-05	31.7951	49011.8
	2.20476	-9.66727e-05	31.8119	48857.8
	2.22055	-9.86771e-05	31.8288	48694
	2.23634	-0.000100681	31.8456	48521.2
	2.25213	-0.000103221	31.8624	48400
	2.26792	-0.000105187	31.8793	48278.8
	2.28371	-0.000104863	31.8961	48149.1
	2.2995	-0.000102818	31.9129	48048.9
	2.31529	-9.98683e-05	31.9298	47966.2
	2.33108	-9.90669e-05	31.9466	47878.9
	2.34687	-9.97974e-05	31.9634	47805.6
	2.36266	-9.96145e-05	31.9803	47778.9
	2.37845	-9.94518e-05	31.9971	47738.2
	2.39424	-9.97998e-05	32.0139	47631.5
	2.41003	-0.000101223	32.0308	47601.7
	2.42581	-0.000101878	32.0476	47593.4
	2.4416	-9.82234e-05	32.0644	47542.6
	2.45739	-9.59742e-05	32.0813	47439.7
	2.47318	-9.55783e-05	32.0981	47358.2
	2.48897	-9.61985e-05	32.1149	47292.5
	2.50476	-9.76389e-05	32.1318	47220.4
	2.52055	-9.87342e-05	32.1486	47166.2
	2.53634	-9.88662e-05	32.1654	47142.1
	2.55213	-0.000100013	32.1823	47192.8
	2.56792	-0.00010096	32.1991	47263.1
	2.58371	-9.81098e-05	32.2159	47244.2
	2.5995	-9.61396e-05	32.2328	47243.4
	2.61529	-9.54892e-05	32.2496	47284.6
	2.63108	-9.45893e-05	32.2664	47379
	2.64687	-9.60791e-05	32.2833	47392.7
	2.66266	-9.76628e-05	32.3001	47309.4
	2.67845	-9.93794e-05
	2.69424	-0.000101096
	2.71003	-9.86502e-05
	2.72582	-9.41208e-05
	2.74161	-9.14657e-05
	2.7574	-9.12058e-05
	2.77319	-9.25157e-05
	2.78898	-9.26926e-05
	2.80477	-9.24387e-05
	2.82055	-9.36744e-05
	2.83634	-9.44422e-05
	2.85213	-9.15861e-05
	2.86792	-8.9078e-05
	2.88371	-8.60253e-05
	2.8995	-8.44366e-05
	2.91529	-8.53558e-05
	2.93108	-8.53194e-05
	2.94687	-8.56157e-05
	2.96266	-8.66584e-05
	2.97845	-8.7577e-05
	2.99424	-8.50585e-05
	3.01003	-8.01775e-05
	3.02582	-7.85192e-05
	3.04161	-7.99454e-05
	3.0574	-7.94089e-05
	3.07319	-7.90516e-05
	3.08898	-7.84999e-05
	3.10477	-7.99307e-05
	3.12056	-8.13615e-05
	3.13635	-7.96933e-05
	3.15214	-7.46058e-05
	3.16793	-7.27663e-05
	3.18372	-7.05868e-05
	3.19951	-6.90305e-05
	3.21529	-7.06133e-05
	3.23108	-7.24014e-05
	3.24687	-7.41896e-05
	3.26266	-7.47631e-05
	3.27845	-7.04369e-05
	3.29424	-6.51288e-05
	3.31003	-6.43248e-05
	3.32582	-6.47511e-05
	3.34161	-6.3455e-05
	3.3574	-6.40023e-05
	3.37319	-6.5202e-05
	3.38898	-6.5476e-05
	3.40477	-6.6835e-05
	3.42056	-6.56664e-05
	3.43635	-6.2599e-05
	3.45214	-6.12952e-05
	3.46793	-6.09827e-05
	3.48372	-6.17815e-05
	3.49951	-6.25802e-05
	3.5153	-6.30457e-05
	3.53109	-6.4434e-05
	3.54688	-6.50897e-05
	3.56267	-5.99281e-05
	3.57846	-5.5415e-05
	3.59425	-5.45033e-05
	3.61004	-5.53616e-05
	3.62582	-5.50216e-05
	3.64161	-5.60642e-05
	3.6574	-5.60879e-05
	3.67319	-5.5333e-05
	3.68898	-5.53817e-05
	3.70477	-5.23111e-05
	3.72056	-5.00247e-05
	3.73635	-4.93873e-05
	3.75214	-4.73992e-05
	3.76793	-4.64431e-05
	3.78372	-4.70335e-05
	3.79951	-4.85438e-05
	3.8153	-4.97403e-05
	3.83109	-4.96916e-05
	3.84688	-4.58292e-05
	3.86267	-3.98065e-05
	3.87846	-3.95318e-05
	3.89425	-4.12289e-05
	3.91004	-4.14914e-05
	3.92583	-4.27735e-05
	3.94162	-4.22592e-05
	3.95741	-4.21391e-05
	3.9732	-4.2114e-05
	3.98899	-3.84275e-05
	4.00478	-3.71961e-05
	4.02056	-3.72981e-05
	4.03635	-3.61065e-05
	4.05214	-3.59937e-05
	4.06793	-3.69863e-05
	4.08372	-3.79789e-05
	4.09951	-3.86935e-05
	4.1153	-3.78463e-05
	4.13109	-3.35058e-05
	4.14688	-2.95376e-05
	4.16267	-2.76538e-05
	4.17846	-2.84803e-05
	4.19425	-3.01025e-05
	4.21004	-3.19311e-05
	4.22583	-3.39866e-05
	4.24162	-3.60421e-05
	4.25741	-3.22192e-05
	4.2732	-2.70747e-05
	4.28899	-2.61944e-05
	4.30478	-2.59831e-05
	4.32057	-2.73969e-05
	4.33636	-2.88108e-05
	4.35215	-3.01564e-05
	4.36794	-2.89917e-05
	4.38373	-2.9619e-05
	4.39952	-2.8303e-05
	4.4153	-2.59646e-05
	4.43109	-2.58117e-05
	4.44688	-2.71781e-05
	4.46267	-2.7172e-05
	4.47846	-2.88387e-05
	4.49425	-3.07232e-05
	4.51004	-3.26077e-05
	4.52583	-3.46142e-05
	4.54162	-3.30646e-05
	4.55741	-2.9182e-05
	4.5732	-2.72956e-05
	4.58899	-2.83845e-05
	4.60478	-3.02076e-05
	4.62057	-3.20625e-05
	4.63636	-3.39174e-05
	4.65215	-3.58041e-05
	4.66794	-3.77527e-05
	4.68373	-3.42168e-05
	4.69952	-3.14438e-05
	4.71531	-3.31034e-05
	4.7311	-3.42105e-05
	4.74689	-3.46844e-05
	4.76268	-3.5937e-05
	4.77847	-3.68056e-05
	4.79426	-3.8391e-05
	4.81004	-3.99765e-05
	4.82583	-3.90185e-05
	4.84162	-3.57952e-05
	4.85741	-3.75339e-05
	4.8732	-3.92726e-05
	4.88899	-3.89164e-05
	4.90478	-4.01245e-05
	4.92057	-4.13327e-05
	4.93636	-4.2277e-05
	4.95215	-4.25642e-05
	4.96794	-4.11842e-05
	4.98373	-3.98972e-05
	4.99952	-4.02918e-05
	5.01531	-4.01812e-05
	5.0311	-4.09204e-05
	5.04689	-4.2592e-05
	5.06268	-4.44042e-05
	5.07847	-4.62165e-05
	5.09426	-4.66045e-05
	5.11005	-4.32322e-05
	5.12584	-3.87115e-05
	5.14163	-3.74239e-05
	5.15742	-3.87065e-05
	5.17321	-3.78329e-05
	5.189	-3.93296e-05
	5.20478	-4.08264e-05
	5.22057	-4.0639e-05
	5.23636	-4.01394e-05
	5.25215	-3.88779e-05
	5.26794	-3.8607e-05
	5.28373	-4.01736e-05
	5.29952	-4.03724e-05
	5.31531	-4.01137e-05
	5.3311	-4.04242e-05
	5.34689	-4.03513e-05
	5.36268	-4.13691e-05
	5.37847	-4.0169e-05
	5.39426	-3.60852e-05
	5.41005	-3.34903e-05
	5.42584	-3.34195e-05
	5.44163	-3.34015e-05
	5.45742	-3.1437e-05
	5.47321	-2.98569e-05
	5.489	-3.07786e-05
	5.50479	-3.17004e-05
	5.52058	-3.16563e-05
	5.53637	-2.9871e-05
	5.55216	-2.85121e-05
	5.56795	-2.53248e-05
	5.58374	-2.44925e-05
	5.59952	-2.47579e-05
	5.61531	-2.46863e-05
	5.6311	-2.61449e-05
	5.64689	-2.6904e-05
	5.66268	-2.53088e-05
	5.67847	-2.05102e-05
	5.69426	-1.56871e-05
	5.71005	-1.31452e-05
	5.72584	-1.37788e-05
	5.74163	-1.41466e-05
	5.75742	-1.41843e-05
	5.77321	-1.46819e-05
	5.789	-1.42035e-05
	5.80479	-9.21511e-06
	5.82058	-4.4828e-06
	5.83637	-4.41848e-06
	5.85216	-4.23009e-06
	5.86795	-5.23184e-06
	5.88374	-6.56841e-06
	5.89953	-8.28186e-06
	5.91532	-8.33006e-06
	5.93111	-7.68466e-06
	5.9469	-3.5474e-06
	5.96269	5.98539e-07
	5.97848	1.59824e-06
	5.99426	3.06645e-06
	6.01005	2.42206e-06
	6.02584	3.7988e-06
	6.04163	6.70027e-06
	6.05742	6.49751e-06
	6.07321	5.77213e-06
	6.089	9.12516e-06
	6.10479	1.173e-05
	6.12058	1.21479e-05
	6.13637	1.37173e-05
	6.15216	1.67646e-05
	6.16795	1.60659e-05
	6.18374	1.4693e-05
	6.19953	1.33201e-05
	6.21532	1.34702e-05
	6.23111	1.50603e-05
	6.2469	1.53821e-05
	6.26269	1.7081e-05
	6.27848	1.87852e-05
	6.29427	1.83846e-05
	6.31006	1.76037e-05
	6.32585	1.66842e-05
	6.34164	1.60854e-05
	6.35743	1.92166e-05
	6.37322	2.51969e-05
	6.389	2.80711e-05
	6.40479	2.80864e-05
	6.42058	2.78492e-05
	6.43637	2.95634e-05
	6.45216	2.91105e-05
	6.46795	2.7955e-05
	6.48374	2.67995e-05
	6.49953	2.77047e-05
	6.51532	3.04932e-05
	6.53111	2.93572e-05
	6.5469	2.82213e-05
	6.56269	2.76031e-05
	6.57848	2.58378e-05
	6.59427	2.51993e-05
	6.61006	2.43511e-05
	6.62585	2.35028e-05
	6.64164	2.37493e-05
	6.65743	2.67707e-05
	6.67322	2.64164e-05
	6.68901	2.61018e-05
	6.7048	2.69824e-05
	6.72059	2.54517e-05
	6.73638	2.50356e-05
	6.75217	2.32516e-05
	6.76796	2.14676e-05
	6.78374	2.25526e-05
	6.79953	2.54688e-05
	6.81532	2.536e-05
	6.83111	2.49254e-05
	6.8469	2.26801e-05
	6.86269	2.04348e-05
	6.87848	1.72201e-05
	6.89427	1.37004e-05
	6.91006	1.10255e-05
	6.92585	1.32246e-05
	6.94164	1.66084e-05
	6.95743	1.63359e-05
	6.97322	1.51941e-05
	6.98901	1.29076e-05
	7.0048	1.06211e-05
	7.02059	5.72104e-06
	7.03638	2.12671e-06
	7.05217	7.71227e-07
	7.06796	3.2365e-06
	7.08375	6.53812e-06
	7.09954	5.03642e-06
	7.11533	3.11435e-06
	7.13112	1.19228e-06
	7.14691	-1.65553e-06
	7.1627	-5.21535e-06
	7.17848	-7.59502e-06
	7.19427	-8.42191e-06
	7.21006	-9.67293e-06
	7.22585	-1.13064e-05
	7.24164	-1.32511e-05
	7.25743	-1.51959e-05
	7.27322	-1.65107e-05
	7.28901	-1.80629e-05
	7.3048	-2.01753e-05
	7.32059	-2.22876e-05
	7.33638	-2.55215e-05
	7.35217	-2.38315e-05
	7.36796	-2.28381e-05
	7.38375	-2.42967e-05
	7.39954	-2.56965e-05
	7.41533	-2.76773e-05
	7.43112	-2.96582e-05
	7.44691	-3.34049e-05
	7.4627	-3.65209e-05
	7.47849	-3.8289e-05
	7.49428	-3.82917e-05
	7.51007	-3.91665e-05
	7.52586	-4.06526e-05
	7.54165	-4.31335e-05
	7.55744	-4.56145e-05
	7.57322	-4.90994e-05
	7.58901	-5.46533e-05
	7.6048	-5.9137e-05
	7.62059	-5.77565e-05
	7.63638	-5.47717e-05
	7.65217	-5.6611e-05
	7.66796	-5.84503e-05
	7.68375	-6.10709e-05
	7.69954	-6.51826e-05
	7.71533	-7.0306e-05
	7.73112	-7.46074e-05
	7.74691	-7.71271e-05
	7.7627	-7.69597e-05
	7.77849	-7.47832e-05
	7.79428	-7.63484e-05
	7.81007	-7.81871e-05
	7.82586	-8.00258e-05
	7.84165	-8.50236e-05
	7.85744	-8.91494e-05
	7.87323	-9.11223e-05
	7.88902	-9.56646e-05
	7.90481	-9.68051e-05
	7.9206	-9.86228e-05
	7.93639	-0.000100724
	7.95218	-0.000102825
	7.96797	-0.000104904
	7.98375	-0.000108115
	7.99954	-0.000111167
	8.01533	-0.000115484
	8.03112	-0.000120755
	8.04691	-0.000123527
	8.0627	-0.000124673
	8.07849	-0.00012633
	8.09428	-0.000128168
	8.11007	-0.000130007
	8.12586	-0.000133232
	8.14165	-0.000136659
	8.15744	-0.000143009
	8.17323	-0.000149217
	8.18902	-0.000149049
	8.20481	-0.000150418
	8.2206	-0.000152438
	8.23639	-0.000154459
	8.25218	-0.000156736
	8.26797	-0.000161419
	8.28376	-0.000166847
	8.29955	-0.000172158
	8.31534	-0.000175956
	8.33113	-0.000176734
	8.34692	-0.000178061
	8.36271	-0.000180966
	8.37849	-0.000183871
	8.39428	-0.000187334
	8.41007	-0.00019283
	8.42586	-0.00019927
	8.44165	-0.000201452
	8.45744	-0.000203411
	8.47323	-0.000205257
	8.48902	-0.000207103
	8.50481	-0.000209665
	8.5206	-0.000213934
	8.53639	-0.000220218
	8.55218	-0.00022673
	8.56797	-0.000229839
	8.58376	-0.000233812
	8.59955	-0.000238267
	8.61534	-0.000240032
	8.63113	-0.000241863
	8.64692	-0.000244294
	8.66271	-0.000246726
	8.6785	-0.00024988
	8.69429	-0.000253424
	8.71008	-0.000258825
	8.72587	-0.000263317
	8.74166	-0.000265253
	8.75745	-0.000267189
	8.77323	-0.000271631
	8.78902	-0.000274119
	8.80481	-0.000276606
	8.8206	-0.000280082
	8.83639	-0.0002856
	8.85218	-0.000290725
	8.86797	-0.000296167
	8.88376	-0.000299286
	8.89955	-0.000301024
	8.91534	-0.000303051
	8.93113	-0.000305077
	8.94692	-0.000309879
	8.96271	-0.000312549
	8.9785	-0.000315219
	8.99429	-0.000322178
	9.01008	-0.000326821
	9.02587	-0.000329382
	9.04166	-0.000331842
	9.05745	-0.000334301
	9.07324	-0.000337756
	9.08903	-0.000343125
	9.10482	-0.000347101
	9.12061	-0.000354558
	9.1364	-0.000359852
	9.15219	-0.000363711
	9.16797	-0.000366631
	9.18376	-0.000369814
	9.19955	-0.000372996
	9.21534	-0.000377872
	9.23113	-0.000383155
	9.24692	-0.000387647
	9.26271	-0.000390003
	9.2785	-0.000396112
	9.29429	-0.000401875
	9.31008	-0.000404308
	9.32587	-0.000406741
	9.34166	-0.000409841
	9.35745	-0.000414499
	9.37324	-0.000417721
	9.38903	-0.000422919
	9.40482	-0.000432393
	9.42061	-0.000441185
	9.4364	-0.000447286
	9.45219	-0.000449095
	9.46798	-0.000451273
	9.48377	-0.00045345
	9.49956	-0.000456998
	9.51535	-0.000463121
	9.53114	-0.000470323
	9.54693	-0.000477154
	9.56271	-0.000485575
	9.5785	-0.000490007
	9.59429	-0.000490596
	9.61008	-0.000491885
	9.62587	-0.000494834
	9.64166	-0.000497783
	9.65745	-0.000504661
	9.67324	-0.000511085
	9.68903	-0.000515564
	9.70482	-0.00052235
	9.72061	-0.000526591
	9.7364	-0.000529108
	9.75219	-0.00053449
	9.76798	-0.000538423
	9.78377	-0.00054251
	9.79956	-0.00054951
	9.81535	-0.000556763
	9.83114	-0.00056356
	9.84693	-0.000568445
	9.86272	-0.000572794
	9.87851	-0.000575171
	9.8943	-0.000577549
	9.91009	-0.000582598
	9.92588	-0.000588669
	9.94167	-0.000593597
	9.95745	-0.00059849
	9.97324	-0.000604338
	9.98903	-0.000609397
	10.0048	-0.000612262
	10.0206	-0.000614895
	10.0364	-0.000618877
	10.0522	-0.000622479
	10.068	-0.000625912
	10.0838	-0.000630903
	10.0996	-0.000636294
	10.1154	-0.000641822
	10.1311	-0.00065049
	10.1469	-0.000658302
	10.1627	-0.000661257
	10.1785	-0.000663935
	10.1943	-0.000666614
	10.2101	-0.0006712
	10.2259	-0.000678185
	10.2417	-0.000685864
	10.2575	-0.000692651
	10.2732	-0.000698638
	10.289	-0.00069863
	10.3048	-0.000701664
	10.3206	-0.000704697
	10.3364	-0.000709005
	10.3522	-0.000712285
	10.368	-0.000717691
	10.3838	-0.000726422
	10.3996	-0.000732948
	10.4154	-0.000735784
	10.4311	-0.000738111
	10.4469	-0.000740979
	10.4627	-0.000745124
	10.4785	-0.000753208
	10.4943	-0.000760374
	10.5101	-0.000765551
	10.5259	-0.000771559
	10.5417	-0.000780087
	10.5575	-0.000786109
	10.5732	-0.000788208
	10.589	-0.000790307
	10.6048	-0.000793094
	10.6206	-0.000798687
	10.6364	-0.000804815
	10.6522	-0.000807826
	10.668	-0.000812926
	10.6838	-0.000820141
	10.6996	-0.000827993
	10.7154	-0.000833142
	10.7311	-0.000836942
	10.7469	-0.000841653
	10.7627	-0.00084474
	10.7785	-0.000848971
	10.7943	-0.000855365
	10.8101	-0.000861941
	10.8259	-0.000868597
	10.8417	-0.000874302
	10.8575	-0.000876831
	10.8733	-0.000879401
	10.889	-0.000881972
	10.9048	-0.00088676
	10.9206	-0.000891946
	10.9364	-0.000899097
	10.9522	-0.000906314
	10.968	-0.00091228
	10.9838	-0.000917458
	10.9996	-0.000919521
	11.0154	-0.000921584
	11.0311	-0.000924731
	11.0469	-0.000931845
	11.0627	-0.000939269
	11.0785	-0.000946861
	11.0943	-0.000953848
	11.1101	-0.000959495
	11.1259	-0.000962543
	11.1417	-0.00096489
	11.1575	-0.000968662
	11.1733	-0.000974862
	11.189	-0.000981061
	11.2048	-0.000986587
	11.2206	-0.000991211
	11.2364	-0.000997073
	11.2522	-0.00100408
	11.268	-0.00100861
	11.2838	-0.00101207
	11.2996	-0.00101553
	11.3154	-0.001022
	11.3312	-0.00102785
	11.3469	-0.00103114
	11.3627	-0.00103549
	11.3785	-0.00104201
	11.3943	-0.00104963
	11.4101	-0.00105433
	11.4259	-0.00105718
	11.4417	-0.00106069
	11.4575	-0.00106371
	11.4733	-0.00106927
	11.489	-0.00107549
	11.5048	-0.00108335
	11.5206	-0.00108912
	11.5364	-0.00109491
	11.5522	-0.001097
	11.568	-0.00109908
	11.5838	-0.00110144
	11.5996	-0.00110692
	11.6154	-0.00111263
	11.6312	-0.00111647
	11.6469	-0.0011231
	11.6627	-0.00113004
	11.6785	-0.00113533
	11.6943	-0.0011372
	11.7101	-0.00113908
	11.7259	-0.00114506
	11.7417	-0.00115039
	11.7575	-0.00115622
	11.7733	-0.00116372
	11.789	-0.00117074
	11.8048	-0.00117678
	11.8206	-0.00118094
	11.8364	-0.00118329
	11.8522	-0.00118564
	11.868	-0.00118853
	11.8838	-0.00119346
	11.8996	-0.00119865
	11.9154	-0.00120376
	11.9312	-0.00120942
	11.9469	-0.00121603
	11.9627	-0.00122066
	11.9785	-0.00122309
	11.9943	-0.00122551
	12.0101	-0.0012287
	12.0259	-0.00123322
	12.0417	-0.00123603
	12.0575	-0.0012409
	12.0733	-0.00124671
	12.0891	-0.0012528
	12.1048	-0.00125897
	12.1206	-0.00126335
	12.1364	-0.0012664
	12.1522	-0.001269
	12.168	-0.00127219
	12.1838	-0.00127798
	12.1996	-0.00128338
	12.2154	-0.00128913
	12.2312	-0.00129595
	12.2469	-0.00129807
	12.2627	-0.00129896
	12.2785	-0.00130093
	12.2943	-0.0013029
	12.3101	-0.00130818
	12.3259	-0.00131188
	12.3417	-0.00131737
	12.3575	-0.00132305
	12.3733	-0.00132767
	12.3891	-0.00132991
	12.4048	-0.0013331
	12.4206	-0.00133715
	12.4364	-0.00134177
	12.4522	-0.00134672
	12.468	-0.00135127
	12.4838	-0.00135568
	12.4996	-0.00135869
	12.5154	-0.00136309
	12.5312	-0.00136555
	12.5469	-0.00136737
	12.5627	-0.00136955
	12.5785	-0.00137174
	12.5943	-0.0013745
	12.6101	-0.00137682
	12.6259	-0.00137924
	12.6417	-0.00138507
	12.6575	-0.00139085
	12.6733	-0.00139119
	12.6891	-0.00139308
	12.7048	-0.00139497
	12.7206	-0.00139725
	12.7364	-0.00139945
	12.7522	-0.00140165
	12.768	-0.0014057
	12.7838	-0.00141216
	12.7996	-0.00141772
	12.8154	-0.00141951
	12.8312	-0.0014204
	12.847	-0.00142242
	12.8627	-0.00142444
	12.8785	-0.00142671
	12.8943	-0.00143078
	12.9101	-0.00143574
	12.9259	-0.00143941
	12.9417	-0.00144175
	12.9575	-0.00143923
	12.9733	-0.00144128
	12.9891	-0.00144333
	13.0048	-0.00144598
	13.0206	-0.00144838
	13.0364	-0.00145276
	13.0522	-0.00145774
	13.068	-0.0014619
	13.0838	-0.00146249
	13.0996	-0.00146336
	13.1154	-0.00146474
	13.1312	-0.00146732
	13.147	-0.00146989
	13.1627	-0.0014747
	13.1785	-0.0014781
	13.1943	-0.00148052
	13.2101	-0.00148294
	13.2259	-0.00148736
	13.2417	-0.00148711
	13.2575	-0.00148802
	13.2733	-0.00148892
	13.2891	-0.00149071
	13.3049	-0.00149306
	13.3206	-0.00149541
	13.3364	-0.00149831
	13.3522	-0.0015013
	13.368	-0.00150417
	13.3838	-0.00150493
	13.3996	-0.00150533
	13.4154	-0.00150707
	13.4312	-0.00150917
	13.447	-0.00151127
	13.4627	-0.00151526
	13.4785	-0.0015203
	13.4943	-0.00152286
	13.5101	-0.00152338
	13.5259	-0.00152082
	13.5417	-0.00152233
	13.5575	-0.00152422
	13.5733	-0.00152612
	13.5891	-0.00152796
	13.6049	-0.0015298
	13.6206	-0.00153218
	13.6364	-0.0015352
	13.6522	-0.00153678
	13.668	-0.00153858
	13.6838	-0.00154069
	13.6996	-0.00154281
	13.7154	-0.00154592
	13.7312	-0.00154897
	13.747	-0.00155291
	13.7627	-0.00155636
	13.7785	-0.00155928
	13.7943	-0.00155933
	13.8101	-0.0015581
	13.8259	-0.00155948
	13.8417	-0.00156125
	13.8575	-0.00156164
	13.8733	-0.00156332
	13.8891	-0.00156522
	13.9049	-0.00156712
	13.9206	-0.00156932
	13.9364	-0.00156849
	13.9522	-0.00156746
	13.968	-0.00156822
	13.9838	-0.00156976
	13.9996	-0.0015723
	14.0154	-0.00157485
	14.0312	-0.00157824
	14.047	-0.00158139
	14.0628	-0.00158375
	14.0785	-0.00158228
	14.0943	-0.00157903
	14.1101	-0.00157741
	14.1259	-0.00157895
	14.1417	-0.00157989
	14.1575	-0.00158152
	14.1733	-0.00158314
	14.1891	-0.00158489
	14.2049	-0.00158474
	14.2206	-0.00158336
	14.2364	-0.00158303
	14.2522	-0.00158356
	14.268	-0.00158501
	14.2838	-0.00158667
	14.2996	-0.00158844
	14.3154	-0.0015902
	14.3312	-0.00159178
	14.347	-0.00159004
	14.3628	-0.00158669
	14.3785	-0.00158702
	14.3943	-0.00158856
	14.4101	-0.00158882
	14.4259	-0.00158948
	14.4417	-0.001591
	14.4575	-0.00159253
	14.4733	-0.00159328
	14.4891	-0.00159132
	14.5049	-0.00158834
	14.5206	-0.00158662
	14.5364	-0.00158581
	14.5522	-0.00158647
	14.568	-0.00158375
	14.5838	-0.0015817
	14.5996	-0.00158233
	14.6154	-0.00158382
	14.6312	-0.00158283
	14.647	-0.00157982
	14.6628	-0.0015771
	14.6785	-0.00157193
	14.6943	-0.00156912
	14.7101	-0.0015672
	14.7259	-0.00156596
	14.7417	-0.00156405
	14.7575	-0.00156063
	14.7733	-0.00155328
	14.7891	-0.00154409
	14.8049	-0.00153809
	14.8207	-0.00153241
	14.8364	-0.00152684
	14.8522	-0.00152188
	14.868	-0.0015155
	14.8838	-0.00150856
	14.8996	-0.00150216
	14.9154	-0.00149088
	14.9312	-0.00147964
	14.947	-0.00147148
	14.9628	-0.00146399
	14.9785	-0.00145562
	14.9943	-0.0014465
	15.0101	-0.00143681
	15.0259	-0.00142651
	15.0417	-0.00141343
	15.0575	-0.00139729
	15.0733	-0.00138346
	15.0891	-0.00137134
	15.1049	-0.00135649
	15.1207	-0.00133991
	15.1364	-0.00132174
	15.1522	-0.00130488
	15.168	-0.00128903
	15.1838	-0.00127064
	15.1996	-0.00125016
	15.2154	-0.00123078
	15.2312	-0.00121182
	15.247	-0.00119232
	15.2628	-0.00117312
	15.2786	-0.00115296
	15.2943	-0.00113194
	15.3101	-0.00111189
	15.3259	-0.00109131
	15.3417	-0.00106608
	15.3575	-0.00103942
	15.3733	-0.00101235
	15.3891	-0.000988524
	15.4049	-0.000964376
	15.4207	-0.000938503
	15.4364	-0.000913827
	15.4522	-0.000891073
	15.468	-0.000865877
	15.4838	-0.000835944
	15.4996	-0.000806763
	15.5154	-0.000780508
	15.5312	-0.000752763
	15.547	-0.000725972
	15.5628	-0.00069816
	15.5786	-0.000671971
	15.5943	-0.00064584
	15.6101	-0.000614745
	15.6259	-0.000584153
	15.6417	-0.000555682
	15.6575	-0.000529543
	15.6733	-0.000502614
	15.6891	-0.00047487
	15.7049	-0.000449839
	15.7207	-0.000423691
	15.7364	-0.000396524
	15.7522	-0.000366476
	15.768	-0.000336504
	15.7838	-0.000309935
	15.7996	-0.000284558
	15.8154	-0.000258702
	15.8312	-0.000231882
	15.847	-0.000205911
	15.8628	-0.000181531
	15.8786	-0.000159195
	15.8943	-0.000135254
	15.9101	-0.000108775
	15.9259	-8.50662e-05
	15.9417	-6.0643e-05
	15.9575	-3.70583e-05
	15.9733	-1.48607e-05
	15.9891	6.09505e-06
	16.0049	2.46186e-05
	16.0207	4.3882e-05
	16.0365	6.68508e-05
	16.0522	9.09542e-05
	16.068	0.000114199
	16.0838	0.000137775
	16.0996	0.000158753
	16.1154	0.000183456
	16.1312	0.000211757
	16.147	0.000241416
	16.1628	0.000276106
	16.1786	0.000319672
	16.1943	0.000368562
	16.2101	0.000420103
	16.2259	0.000476891
	16.2417	0.000539596
	16.2575	0.000611561
	16.2733	0.00069305
	16.2891	0.000781862
	16.3049	0.000878515
	16.3207	0.000984145
	16.3365	0.00109756
	16.3522	0.00121192
	16.368	0.00132794
	16.3838	0.00144874
	16.3996	0.00157461
	16.4154	0.00170025
	16.4312	0.00182433
	16.447	0.00194882
	16.4628	0.00207516
	16.4786	0.0021998
	16.4943	0.00231653
	16.5101	0.00242986
	16.5259	0.00254223
	16.5417	0.0026485
	16.5575	0.00274961
	16.5733	0.00284752
	16.5891	0.00294244
	16.6049	0.00303693
	16.6207	0.0031273
	16.6365	0.00321288
	16.6522	0.00329334
	16.668	0.00336683
	16.6838	0.00343713
	16.6996	0.00350464
	16.7154	0.00356862
	16.7312	0.00363087
	16.747	0.00369182
	16.7628	0.00374833
	16.7786	0.00379826
	16.7944	0.00384135
	16.8101	0.00388018
	16.8259	0.00391601
	16.8417	0.00394615
	16.8575	0.0039711
	16.8733	0.00399519
	16.8891	0.00401642
	16.9049	0.00402998
	16.9207	0.00403545
	16.9365	0.00403251
	16.9522	0.00402956
	16.968	0.00402455
	16.9838	0.00401157
	16.9996	0.00399217
	17.0154	0.00397145
	17.0312	0.00394886
	17.047	0.00391981
	17.0628	0.00388496
	17.0786	0.00384802
	17.0944	0.00381081
	17.1101	0.0037668
	17.1259	0.00371689
	17.1417	0.00366538
	17.1575	0.0036144
	17.1733	0.0035603
	17.1891	0.00350173
	17.2049	0.00344281
	17.2207	0.00338126
	17.2365	0.00331636
	17.2523	0.0032495
	17.268	0.003181
	17.2838	0.00311295
	17.2996	0.00304696
	17.3154	0.00298179
	17.3312	0.00291391
	17.347	0.00284636
	17.3628	0.00277986
	17.3786	0.00271098
	17.3944	0.00264224
	17.4101	0.00257343
	17.4259	0.00250688
	17.4417	0.00244414
	17.4575	0.0023799
	17.4733	0.00231765
	17.4891	0.00225602
	17.5049	0.00219469
	17.5207	0.00213778
	17.5365	0.00208071
	17.5523	0.00202292
	17.568	0.00196826
	17.5838	0.00191791
	17.5996	0.00186519
	17.6154	0.00181233
	17.6312	0.00176208
	17.647	0.00171138
	17.6628	0.00165968
	17.6786	0.00160868
	17.6944	0.00155882
	17.7101	0.0015111
	17.7259	0.00146771
	17.7417	0.00142269
	17.7575	0.00137503
	17.7733	0.00132998
	17.7891	0.00128631
	17.8049	0.00124199
	17.8207	0.00119685
	17.8365	0.00115072
	17.8523	0.00110757
	17.868	0.00107129
	17.8838	0.00103432
	17.8996	0.000996109
	17.9154	0.000958641
	17.9312	0.000922807
	17.947	0.00088648
	17.9628	0.00084911
	17.9786	0.000812122
	17.9944	0.000777978
	18.0102	0.000749515
	18.0259	0.000721756
	18.0417	0.000690897
	18.0575	0.000660202
	18.0733	0.000630796
	18.0891	0.000601648
	18.1049	0.000571763
	18.1207	0.000546435
	18.1365	0.000528039
	18.1523	0.000509292
	18.168	0.000486795
	18.1838	0.000463811
	18.1996	0.000441968
	18.2154	0.000421803
	18.2312	0.000401169
	18.247	0.000381481
	18.2628	0.000362905
	18.2786	0.000347882
	18.2944	0.000334615
	18.3102	0.000318146
	18.3259	0.000300661
	18.3417	0.000285826
	18.3575	0.000273369
	18.3733	0.000259566
	18.3891	0.000243758
	18.4049	0.000229186
	18.4207	0.000218749
	18.4365	0.000210737
	18.4523	0.000200481
	18.468	0.000189615
	18.4838	0.000181552
	18.4996	0.000171809
	18.5154	0.000160379
	18.5312	0.000150008
	18.547	0.000139383
	18.5628	0.000133571
	18.5786	0.000129916
	18.5944	0.000122259
	18.6102	0.000114474
	18.6259	0.00010737
	18.6417	0.000100424
	18.6575	9.20943e-05
	18.6733	8.34859e-05
	18.6891	7.61497e-05
	18.7049	7.22716e-05
	18.7207	6.96271e-05
	18.7365	6.43883e-05
	18.7523	5.81593e-05
	18.7681	5.15283e-05
	18.7838	4.4263e-05
	18.7996	3.75676e-05
	18.8154	3.14787e-05
	18.8312	2.81583e-05
	18.847	2.62012e-05
	18.8628	2.24786e-05
	18.8786	1.81242e-05
	18.8944	1.14251e-05
	18.9102	4.43374e-06
	18.9259	-2.3685e-06
	18.9417	-8.01585e-06
	18.9575	-1.43851e-05
	18.9733	-2.0352e-05
	18.9891	-2.23009e-05
	19.0049	-2.55343e-05
	19.0207	-3.02229e-05
	19.0365	-3.50749e-05
	19.0523	-3.83703e-05
	19.0681	-4.25926e-05
	19.0838	-4.89276e-05
	19.0996	-5.56812e-05
	19.1154	-6.04064e-05
	19.1312	-6.34431e-05
	19.147	-6.7559e-05
	19.1628	-7.07234e-05
	19.1786	-7.47216e-05
	19.1944	-8.16065e-05
	19.2102	-8.81092e-05
	19.226	-9.44214e-05
	19.2417	-9.90614e-05
	19.2575	-0.00010195
	19.2733	-0.000103908
	19.2891	-0.000105865
	19.3049	-0.00010852
	19.3207	-0.000112986
	19.3365	-0.00011773
	19.3523	-0.000123335
	19.3681	-0.000129615
	19.3838	-0.000134999
	19.3996	-0.000135047
	19.4154	-0.000133989
	19.4312	-0.000136544
	19.447	-0.000139099
	19.4628	-0.000142673
	19.4786	-0.000148288
	19.4944	-0.000152091
	19.5102	-0.000154095
	19.526	-0.00015714
	19.5417	-0.000156385
	19.5575	-0.000152364
	19.5733	-0.000153789
	19.5891	-0.000155618
	19.6049	-0.000157447
	19.6207	-0.00015763
	19.6365	-0.000158148
	19.6523	-0.000158556
	19.6681	-0.000159583
	19.6838	-0.000154019
	19.6996	-0.000149452
	19.7154	-0.000148295
	19.7312	-0.000145079
	19.747	-0.000140152
	19.7628	-0.000138177
	19.7786	-0.0001373
	19.7944	-0.000135153
	19.8102	-0.000131278
	19.826	-0.000123292
	19.8417	-0.000115741
	19.8575	-0.000107447
	19.8733	-9.99621e-05
	19.8891	-9.36917e-05
	19.9049	-8.68186e-05
	19.9207	-8.06185e-05
	19.9365	-7.38236e-05
	19.9523	-6.3737e-05
	19.9681	-4.76362e-05
	19.9839	-3.16422e-05
	19.9996	-1.9277e-05
	20.0154	-7.1647e-06
	20.0312	5.40767e-06
	20.047	1.91873e-05
	20.0628	3.39107e-05
	20.0786	5.03441e-05
	20.0944	7.03044e-05
	20.1102	9.46307e-05
	20.126	0.000118552
	20.1417	0.000138606
	20.1575	0.000158847
	20.1733	0.0001811
	20.1891	0.000206894
	20.2049	0.000233273
	20.2207	0.000259219
	20.2365	0.000287395
	20.2523	0.000320558
	20.2681	0.000353956
	20.2839	0.000388423
	20.2996	0.000423849
	20.3154	0.0004625
	20.3312	0.000503506
	20.347	0.000545597
	20.3628	0.000587674
	20.3786	0.000634731
	20.3944	0.000688814
	20.4102	0.000744574
	20.426	0.000799407
	20.4418	0.000856037
	20.4575	0.000918212
	20.4733	0.000981496
	20.4891	0.00104695
	20.5049	0.00111482
	20.5207	0.00118855
	20.5365	0.00126854
	20.5523	0.00135358
	20.5681	0.00144195
	20.5839	0.00153049
	20.5996	0.00162396
	20.6154	0.00172249
	20.6312	0.0018249
	20.647	0.00193262
	20.6628	0.00204971
	20.6786	0.00217555
	20.6944	0.00230339
	20.7102	0.00243218
	20.726	0.00256415
	20.7418	0.00270243
	20.7575	0.00284679
	20.7733	0.0029976
	20.7891	0.0031543
	20.8049	0.00332029
	20.8207	0.00349389
	20.8365	0.00366707
	20.8523	0.00383816
	20.8681	0.00401347
	20.8839	0.00419858
	20.8996	0.00439098
	20.9154	0.00458453
	20.9312	0.00478028
	20.947	0.00498331
	20.9628	0.00519194
	20.9786	0.00540222
	20.9944	0.00561073
	21.0102	0.00582152
	21.026	0.00603587
	21.0418	0.00625098
	21.0575	0.00646996
	21.0733	0.00668743
	21.0891	0.00690537
	21.1049	0.00712581
	21.1207	0.00734515
	21.1365	0.00755902
	21.1523	0.0077674
	21.1681	0.00797552
	21.1839	0.00818195
	21.1997	0.00838469
	21.2154	0.00858555
	21.2312	0.0087856
	21.247	0.00898099
	21.2628	0.00916842
	21.2786	0.00934516
	21.2944	0.00952449
	21.3102	0.00970509
	21.326	0.00986851
	21.3418	0.0100235
	21.3575	0.0101726
	21.3733	0.0103183
	21.3891	0.0104567
	21.4049	0.0105824
	21.4207	0.0106958
	21.4365	0.010804
	21.4523	0.0109044
	21.4681	0.0109953
	21.4839	0.0110779
	21.4997	0.011154
	21.5154	0.0112215
	21.5312	0.0112799
	21.547	0.0113311
	21.5628	0.0113714
	21.5786	0.0114033
	21.5944	0.0114266
	21.6102	0.0114432
	21.626	0.0114504
	21.6418	0.011446
	21.6575	0.0114416
	21.6733	0.011434
	21.6891	0.0114129
	21.7049	0.0113858
	21.7207	0.0113505
	21.7365	0.0113067
	21.7523	0.011256
	21.7681	0.0111992
	21.7839	0.0111378
	21.7997	0.0110726
	21.8154	0.0109996
	21.8312	0.0109248
	21.847	0.0108456
	21.8628	0.0107584
	21.8786	0.0106667
	21.8944	0.0105714
	21.9102	0.0104735
	21.926	0.010374
	21.9418	0.0102744
	21.9576	0.0101717
	21.9733	0.0100654
	21.9891	0.0099582
	22.0049	0.00985004
	22.0207	0.00973652
	22.0365	0.00962183
	22.0523	0.00950387
	22.0681	0.00938185
	22.0839	0.00926335
	22.0997	0.00914984
	22.1154	0.00903673
	22.1312	0.00892496
	22.147	0.0088138
	22.1628	0.00870169
	22.1786	0.00858956
	22.1944	0.00847882
	22.2102	0.00837315
	22.226	0.00826709
	22.2418	0.00816146
	22.2576	0.00805851
	22.2733	0.00795752
	22.2891	0.00785628
	22.3049	0.00775708
	22.3207	0.00766165
	22.3365	0.00756951
	22.3523	0.00748261
	22.3681	0.00739896
	22.3839	0.00731532
	22.3997	0.00723311
	22.4155	0.0071552
	22.4312	0.00707937
	22.447	0.00700354
	22.4628	0.00692951
	22.4786	0.00686147
	22.4944	0.00679833
	22.5102	0.00673702
	22.526	0.00668088
	22.5418	0.0066257
	22.5576	0.00657085
	22.5733	0.00651849
	22.5891	0.0064699
	22.6049	0.00642615
	22.6207	0.00638895
	22.6365	0.00635814
	22.6523	0.00632973
	22.6681	0.00630309
	22.6839	0.00627909
	22.6997	0.00625869
	22.7155	0.00624221
	22.7312	0.00622861
	22.747	0.00621918
	22.7628	0.00621637
	22.7786	0.00621745
	22.7944	0.00621986
	22.8102	0.00622488
	22.826	0.00623472
	22.8418	0.00624982
	22.8576	0.00627073
	22.8733	0.00629413
	22.8891	0.00631958
	22.9049	0.00635187
	22.9207	0.00639048
	22.9365	0.00643044
	22.9523	0.00647413
	22.9681	0.00652553
	22.9839	0.006583
	22.9997	0.00664046
	23.0155	0.00670012
	23.0312	0.00676395
	23.047	0.00683601
	23.0628	0.00691282
	23.0786	0.00699231
	23.0944	0.00707569
	23.1102	0.00715892
	23.126	0.00724575
	23.1418	0.00733655
	23.1576	0.00743179
	23.1734	0.00753327
	23.1891	0.00764143
	23.2049	0.00775431
	23.2207	0.00786704
	23.2365	0.00798027
	23.2523	0.00809307
	23.2681	0.00820927
	23.2839	0.00833096
	23.2997	0.00845569
	23.3155	0.00858188
	23.3312	0.00871399
	23.347	0.00884727
	23.3628	0.00897973
	23.3786	0.00911236
	23.3944	0.00925237
	23.4102	0.00939793
	23.426	0.0095357
	23.4418	0.00967084
	23.4576	0.0098065
	23.4734	0.00994242
	23.4891	0.0100791
	23.5049	0.0102144
	23.5207	0.0103452
	23.5365	0.0104744
	23.5523	0.010605
	23.5681	0.0107319
	23.5839	0.0108566
	23.5997	0.010981
	23.6155	0.0111047
	23.6312	0.0112254
	23.647	0.0113408
	23.6628	0.0114499
	23.6786	0.0115562
	23.6944	0.0116612
	23.7102	0.0117598
	23.726	0.0118526
	23.7418	0.0119444
	23.7576	0.0120317
	23.7734	0.0121159
	23.7891	0.012198
	23.8049	0.0122716
	23.8207	0.0123398
	23.8365	0.0124045
	23.8523	0.0124618
	23.8681	0.0125139
	23.8839	0.0125672
	23.8997	0.0126172
	23.9155	0.012661
	23.9313	0.0126987
	23.947	0.0127285
	23.9628	0.0127532
	23.9786	0.0127746
	23.9944	0.0127904
	24.0102	0.0128015
	24.026	0.0128139
	24.0418	0.0128203
	24.0576	0.0128171
	24.0734	0.012814
	24.0891	0.0128093
	24.1049	0.0127975
	24.1207	0.0127836
	24.1365	0.0127696
	24.1523	0.0127562
	24.1681	0.0127427
	24.1839	0.0127282
	24.1997	0.0127113
	24.2155	0.0126922
	24.2313	0.0126731
	24.247	0.0126554
	24.2628	0.0126363
	24.2786	0.0126181
	24.2944	0.012601
	24.3102	0.0125875
	24.326	0.0125781
	24.3418	0.0125692
	24.3576	0.0125627
	24.3734	0.0125632
	24.3892	0.012567
	24.4049	0.0125733
	24.4207	0.0125865
	24.4365	0.0126088
	24.4523	0.0126436
	24.4681	0.0126868
	24.4839	0.0127373
	24.4997	0.0127984
	24.5155	0.012866
	24.5313	0.0129444
	24.547	0.0130363
	24.5628	0.0131414
	24.5786	0.0132623
	24.5944	0.0134032
	24.6102	0.0135609
	24.626	0.0137306
	24.6418	0.013913
	24.6576	0.0141151
	24.6734	0.0143414
	24.6892	0.0145898
	24.7049	0.014858
	24.7207	0.0151503
	24.7365	0.0154731
	24.7523	0.0158209
	24.7681	0.0161957
	24.7839	0.0165936
	24.7997	0.0170173
	24.8155	0.0174735
	24.8313	0.0179621
	24.847	0.0184854
	24.8628	0.0190423
	24.8786	0.0195735
	24.8944	0.0201498
	24.9102	0.020813
	24.926	0.0214992
	24.9418	0.0222223
	24.9576	0.0229895
	24.9734	0.0237973
	24.9892	0.0246435
	25.0049	0.025528
	25.0207	0.026457
	25.0365	0.0274293
	25.0523	0.0284346
	25.0681	0.0294639
	25.0839	0.0305351
	25.0997	0.0316575
	25.1155	0.0328204
	25.1313	0.0340186
	25.1471	0.035253
	25.1628	0.0365317
	25.1786	0.0378566
	25.1944	0.0392074
	25.2102	0.0405696
	25.226	0.0419623
	25.2418	0.0433881
	25.2576	0.0448454
	25.2734	0.0463199
	25.2892	0.0478096
	25.3049	0.0493301
	25.3207	0.0508744
	25.3365	0.0524171
	25.3523	0.0539586
	25.3681	0.0555024
	25.3839	0.0570541
	25.3997	0.0586083
	25.4155	0.0601502
	25.4313	0.06168
	25.4471	0.0632061
	25.4628	0.0647266
	25.4786	0.066232
	25.4944	0.0677065
	25.5102	0.0691432
	25.526	0.0705519
	25.5418	0.0719213
	25.5576	0.0732467
	25.5734	0.0745282
	25.5892	0.0757852
	25.6049	0.0770433
	25.6207	0.0782568
	25.6365	0.0793763
	25.6523	0.0804269
	25.6681	0.0814211
	25.6839	0.0823602
	25.6997	0.0832403
	25.7155	0.0840645
	25.7313	0.0848352
	25.7471	0.085547
	25.7628	0.086208
	25.7786	0.0868119
	25.7944	0.0873334
	25.8102	0.0877879
	25.826	0.0881839
	25.8418	0.0885189
	25.8576	0.0887981
	25.8734	0.0890233
	25.8892	0.0891895
	25.905	0.0892954
	25.9207	0.0892971
	25.9365	0.0892892
	25.9523	0.0892813
	25.9681	0.0891809
	25.9839	0.0890435
	25.9997	0.0888672
	26.0155	0.0886452
	26.0313	0.0883826
	26.0471	0.0880866
	26.0628	0.0877544
	26.0786	0.0873831
	26.0944	0.0869792
	26.1102	0.0865275
	26.126	0.0860431
	26.1418	0.0855574
	26.1576	0.0850494
	26.1734	0.0845259
	26.1892	0.0839898
	26.205	0.0834357
	26.2207	0.0828616
	26.2365	0.082269
	26.2523	0.0816674
	26.2681	0.0810627
	26.2839	0.0804466
	26.2997	0.0798167
	26.3155	0.0791795
	26.3313	0.0785427
	26.3471	0.0778666
	26.3629	0.0771717
	26.3786	0.0764759
	26.3944	0.0757879
	26.4102	0.0751344
	26.426	0.0744765
	26.4418	0.0738121
	26.4576	0.0731508
	26.4734	0.0724906
	26.4892	0.0718228
	26.505	0.0711518
	26.5207	0.070483
	26.5365	0.0698152
	26.5523	0.0691527
	26.5681	0.0684881
	26.5839	0.0678174
	26.5997	0.0671577
	26.6155	0.0664768
	26.6313	0.0657806
	26.6471	0.0651071
	26.6629	0.0644369
	26.6786	0.063773
	26.6944	0.063112
	26.7102	0.0624466
	26.726	0.0617729
	26.7418	0.0611063
	26.7576	0.0604462
	26.7734	0.0597749
	26.7892	0.0591016
	26.805	0.0584314
	26.8207	0.0577619
	26.8365	0.0570988
	26.8523	0.0564313
	26.8681	0.0557593
	26.8839	0.0551
	26.8997	0.0544463
	26.9155	0.0537849
	26.9313	0.0531175
	26.9471	0.0524508
	26.9629	0.0517933
	26.9786	0.0511398
	26.9944	0.0504838
	27.0102	0.0498272
	27.026	0.0491803
	27.0418	0.0485369
	27.0576	0.0478914
	27.0734	0.0472466
	27.0892	0.0466112
	27.105	0.0459879
	27.1208	0.0453683
	27.1365	0.0447514
	27.1523	0.0441416
	27.1681	0.0435454
	27.1839	0.0429566
	27.1997	0.0423689
	27.2155	0.0417846
	27.2313	0.0412101
	27.2471	0.040651
	27.2629	0.0401018
	27.2786	0.0395531
	27.2944	0.0390144
	27.3102	0.0384918
	27.326	0.0379815
	27.3418	0.0374772
	27.3576	0.0369796
	27.3734	0.0364957
	27.3892	0.0360248
	27.405	0.0355648
	27.4208	0.0351134
	27.4365	0.0346725
	27.4523	0.0342468
	27.4681	0.0338324
	27.4839	0.0334258
	27.4997	0.0330291
	27.5155	0.0326446
	27.5313	0.0322752
	27.5471	0.0319189
	27.5629	0.0315661
	27.5786	0.0312264
	27.5944	0.030906
	27.6102	0.0305915
	27.626	0.0302823
	27.6418	0.0299865
	27.6576	0.029701
	27.6734	0.0294319
	27.6892	0.0291748
	27.705	0.0289228
	27.7208	0.0286855
	27.7365	0.0284627
	27.7523	0.0282478
	27.7681	0.0280403
	27.7839	0.0278454
	27.7997	0.0276647
	27.8155	0.0274972
	27.8313	0.0273429
	27.8471	0.027199
	27.8629	0.0270672
	27.8787	0.0269489
	27.8944	0.0268435
	27.9102	0.0267502
	27.926	0.0266737
	27.9418	0.0266144
	27.9576	0.0265737
	27.9734	0.0265508
	27.9892	0.0265428
	28.005	0.0265539
	28.0208	0.0265883
	28.0365	0.0266456
	28.0523	0.0267264
	28.0681	0.0268338
	28.0839	0.0269682
	28.0997	0.0271369
	28.1155	0.0273424
	28.1313	0.0275843
	28.1471	0.0278661
	28.1629	0.0281941
	28.1787	0.0285732
	28.1944	0.0290085
	28.2102	0.0295063
	28.226	0.0300715
	28.2418	0.0307171
	28.2576	0.0314546
	28.2734	0.0322749
	28.2892	0.0331814
	28.305	0.0341993
	28.3208	0.0353527
	28.3366	0.0366512
	28.3523	0.0381002
	28.3681	0.0397125
	28.3839	0.0415215
	28.3997	0.0435458
	28.4155	0.0457744
	28.4313	0.0482041
	28.4471	0.0509041
	28.4629	0.0539199
	28.4787	0.0572592
	28.4944	0.060933
	28.5102	0.0649824
	28.526	0.0694622
	28.5418	0.074417
	28.5576	0.0798157
	28.5734	0.0856292
	28.5892	0.0919881
	28.605	0.0988717
	28.6208	0.106277
	28.6366	0.114281
	28.6523	0.122842
	28.6681	0.132038
	28.6839	0.141843
	28.6997	0.152181
	28.7155	0.163079
	28.7313	0.174743
	28.7471	0.18728
	28.7629	0.200639
	28.7787	0.214675
	28.7944	0.229299
	28.8102	0.244583
	28.826	0.260522
	28.8418	0.276862
	28.8576	0.293657
	28.8734	0.311365
	28.8892	0.329966
	28.905	0.349053
	28.9208	0.368408
	28.9366	0.388094
	28.9523	0.408386
	28.9681	0.429285
	28.9839	0.450476
	28.9997	0.471743
	29.0155	0.493069
	29.0313	0.514509
	29.0471	0.536148
	29.0629	0.55788
	29.0787	0.579683
	29.0945	0.601407
	29.1102	0.622826
	29.126	0.64385
	29.1418	0.664671
	29.1576	0.685441
	29.1734	0.705939
	29.1892	0.725778
	29.205	0.74492
	29.2208	0.76363
	29.2366	0.782051
	29.2523	0.800072
	29.2681	0.817318
	29.2839	0.833736
	29.2997	0.849492
	29.3155	0.864516
	29.3313	0.878833
	29.3471	0.892384
	29.3629	0.905273
	29.3787	0.917571
	29.3945	0.929093
	29.4102	0.939669
	29.426	0.949362
	29.4418	0.958234
	29.4576	0.966273
	29.4734	0.973438
	29.4892	0.979647
	29.505	0.985055
	29.5208	0.989723
	29.5366	0.993564
	29.5524	0.996536
	29.5681	0.998677
	29.5839	1
	29.5997	0.9998
	29.6155	0.9996
	29.6313	0.999102
	29.6471	0.997211
	29.6629	0.994546
	29.6787	0.991179
	29.6945	0.987135
	29.7102	0.982369
	29.726	0.976895
	29.7418	0.970705
	29.7576	0.963808
	29.7734	0.956278
	29.7892	0.948054
	29.805	0.939229
	29.8208	0.929934
	29.8366	0.920154
	29.8524	0.909818
	29.8681	0.898995
	29.8839	0.887809
	29.8997	0.876308
	29.9155	0.864515
	29.9313	0.852332
	29.9471	0.839683
	29.9629	0.826805
	29.9787	0.81379
	29.9945	0.8004
	30.0102	0.786699
	30.026	0.77296
	30.0418	0.759247
	30.0576	0.745518
	30.0734	0.731656
	30.0892	0.71755
	30.105	0.703461
	30.1208	0.689422
	30.1366	0.675242
	30.1524	0.661159
	30.1681	0.647268
	30.1839	0.633551
	30.1997	0.620045
	30.2155	0.606566
	30.2313	0.593053
	30.2471	0.579873
	30.2629	0.566934
	30.2787	0.553986
	30.2945	0.541178
	30.3103	0.528703
	30.326	0.516581
	30.3418	0.504715
	30.3576	0.493011
	30.3734	0.481452
	30.3892	0.470124
	30.405	0.459088
	30.4208	0.448225
	30.4366	0.437531
	30.4524	0.427124
	30.4681	0.417116
	30.4839	0.407439
	30.4997	0.397957
	30.5155	0.388727
	30.5313	0.37993
	30.5471	0.371393
	30.5629	0.362942
	30.5787	0.354647
	30.5945	0.346575
	30.6103	0.338822
	30.626	0.331245
	30.6418	0.323787
	30.6576	0.316551
	30.6734	0.309613
	30.6892	0.302925
	30.705	0.296449
	30.7208	0.290201
	30.7366	0.284161
	30.7524	0.278342
	30.7681	0.272694
	30.7839	0.26719
	30.7997	0.2619
	30.8155	0.256888
	30.8313	0.251981
	30.8471	0.247119
	30.8629	0.242396
	30.8787	0.237835
	30.8945	0.233386
	30.9103	0.229038
	30.926	0.224827
	30.9418	0.220794
	30.9576	0.216927
	30.9734	0.213076
	30.9892	0.209308
	31.005	0.205684
	31.0208	0.202172
	31.0366	0.198805
	31.0524	0.195475
	31.0682	0.192229
	31.0839	0.189175
	31.0997	0.186237
	31.1155	0.183362
	31.1313	0.180589
	31.1471	0.177912
	31.1629	0.17535
	31.1787	0.172891
	31.1945	0.170511
	31.2103	0.168215
	31.226	0.166036
[truncated: 1,799 more rows]
