# Supplementary material for: Antibacterial T6SS effectors with a VRR-Nuc domain are structure-specific nucleases
Source: eLife. 2022 Oct 13;11:e82437. doi: 10.7554/eLife.82437 (PMC9635880; doi:10.7554/eLife.82437)
Supplement: Supplementary file 2. [file elife-82437-supp2.xlsx]

## Sheet: TseV
Supplementary file 2A. List of TseV homologs.
nucleotide	start	end	pid	locus	assembly	product	pfam	organism	classification
CP012193.1	1349833	1350801	ALE57950.1	AC233_26055	GCA_001021065.1	hypothetical protein	TM	Burkholderia sp. HB1	Bacteria; Proteobacteria; Betaproteobacteria; Burkholderiales; Burkholderiaceae; Burkholderia
CP016434.1	3276262	3276996	ASL44688.1	bAD24_I14480	GCA_000486525.2	hypothetical protein	VRR_NUC	Burkholderia sp. AD24	Bacteria; Proteobacteria; Betaproteobacteria; Burkholderiales; Burkholderiaceae; Burkholderia
CP016435.1	72059	73303	ASL45819.1	bAD24_III00385	GCA_000189435.3	hypothetical protein	VRR_NUC+TM+TM	Burkholderia sp. AD24	Bacteria; Proteobacteria; Betaproteobacteria; Burkholderiales; Burkholderiaceae; Burkholderia
CP031282.1	1576342	1576536	AXM03257.1	DKG79_08245	GCA_003293325.1	hypothetical protein	VRR_NUC	Escherichia fergusonii	Bacteria; Proteobacteria; Gammaproteobacteria; Enterobacterales; Enterobacteriaceae; Escherichia
CP031879.1	5295716	5296417	AXS90147.1	D0Y56_25330	GCA_003293325.1	VRR-NUC domain-containing protein	VRR_NUC+TM	Pseudomonas aeruginosa	Bacteria; Proteobacteria; Gammaproteobacteria; Pseudomonadales; Pseudomonadaceae; Pseudomonas
CP027745.1	441000	441497	AZD58374.1	C4K18_0371	GCA_003522555.1	Phage protein	VRR_NUC	Pseudomonas chlororaphis subsp. aurantiaca	Bacteria; Proteobacteria; Gammaproteobacteria; Pseudomonadales; Pseudomonadaceae; Pseudomonas
CP034537.1	1224593	1225459	AZP69997.1	EJJ20_05640	GCA_003522555.1	VRR-NUC domain-containing protein	SP+VRR_NUC	Pseudomonas poae	Bacteria; Proteobacteria; Gammaproteobacteria; Pseudomonadales; Pseudomonadaceae; Pseudomonas
CP034537.1	1227438	1228307	AZP69999.1	EJJ20_05650	GCA_003522555.1	VRR-NUC domain-containing protein	SP+VRR_NUC	Pseudomonas poae	Bacteria; Proteobacteria; Gammaproteobacteria; Pseudomonadales; Pseudomonadaceae; Pseudomonas
CP034537.1	6495830	6496708	AZP72919.1	EJJ20_30755	GCA_000010425.1	VRR-NUC domain-containing protein	VRR_NUC	Pseudomonas poae	Bacteria; Proteobacteria; Gammaproteobacteria; Pseudomonadales; Pseudomonadaceae; Pseudomonas
CACSGV010000003.1	5115	6071	CAA0154792.1	ABKPCSM17A_00205	GCA_000002855.2	hypothetical protein	SP	Acinetobacter baumannii	Bacteria; Proteobacteria; Gammaproteobacteria; Moraxellales; Moraxellaceae; Acinetobacter; Acinetobacter calcoaceticus/baumannii complex
CAKW01000147.1	38850	39758	CCJ74813.1	BN137_4214	GCA_000286035.1	Complete genome; segment 3/17	VRR_NUC	Cronobacter condimenti 1330	Bacteria; Proteobacteria; Gammaproteobacteria; Enterobacterales; Enterobacteriaceae; Cronobacter
CALA01000393.1	2253608	2254810	CCJ85060.1	BN133_1437	GCA_000286035.1	Complete genome; segment 3/17	VRR_NUC+TM+TM	Cronobacter dublinensis 582	Bacteria; Proteobacteria; Gammaproteobacteria; Enterobacterales; Enterobacteriaceae; Cronobacter
CALE01000616.1	2404662	2405447	CCK03148.1	BN129_1773	GCA_000286035.1	Complete genome; segment 3/17	TM+TM	Cronobacter sakazakii 701	Bacteria; Proteobacteria; Gammaproteobacteria; Enterobacterales; Enterobacteriaceae; Cronobacter
CALF01000071.1	2435381	2436190	CCK07597.1	BN128_1542	GCA_000286035.1	Complete genome; segment 3/17	VRR_NUC	Cronobacter sakazakii 696	Bacteria; Proteobacteria; Gammaproteobacteria; Enterobacterales; Enterobacteriaceae; Cronobacter
CHDS01002576.1	15	272	CNK51383.1	ERS124361_07550	GCA_001095665.1	Uncharacterised protein	VRR_NUC	Mycobacterium tuberculosis	Bacteria; Actinobacteria; Corynebacteriales; Mycobacteriaceae; Mycobacterium; Mycobacterium tuberculosis complex
AACXYN010000006.1	129005	130531	EAN3838429.1	EGB73_10385	GCA_000152565.1	hypothetical protein	VRR_NUC+TM+TM	Salmonella enterica	Bacteria; Proteobacteria; Gammaproteobacteria; Enterobacterales; Enterobacteriaceae; Salmonella
AAFXTK010000084.1	1	1274	EBL0249621.1	DY918_23515	GCA_000152565.1	hypothetical protein	VRR_NUC+TM+TM	Salmonella enterica	Bacteria; Proteobacteria; Gammaproteobacteria; Enterobacterales; Enterobacteriaceae; Salmonella
AAGAIR010000012.1	133887	135158	EBL8291902.1	DLP14_14715	GCA_000152565.1	VRR-NUC domain-containing protein	VRR_NUC+TM	Salmonella enterica	Bacteria; Proteobacteria; Gammaproteobacteria; Enterobacterales; Enterobacteriaceae; Salmonella
AAIIMR010000012.1	53222	54403	ECE6019211.1	DL121_13345	GCA_007577105.1	hypothetical protein	Tox-PAAR-like	Salmonella enterica subsp. enterica	Bacteria; Proteobacteria; Gammaproteobacteria; Enterobacterales; Enterobacteriaceae; Salmonella
AAIKHS010000060.1	12497	13030	ECF1703729.1	E1B77_22860	GCA_007577105.1	hypothetical protein	VRR_NUC	Salmonella enterica subsp. enterica	Bacteria; Proteobacteria; Gammaproteobacteria; Enterobacterales; Enterobacteriaceae; Salmonella
AAIQBY010000027.1	5090	5845	ECG9617370.1	FO256_21455	GCA_007577105.1	VRR-NUC domain-containing protein	VRR_NUC+TM+TM	Salmonella enterica	Bacteria; Proteobacteria; Gammaproteobacteria; Enterobacterales; Enterobacteriaceae; Salmonella
AAKRCK010000001.1	541355	541825	ECU8083957.1	BKI62_02670	GCA_007577105.1	hypothetical protein		Salmonella enterica subsp. enterica serovar Cerro	Bacteria; Proteobacteria; Gammaproteobacteria; Enterobacterales; Enterobacteriaceae; Salmonella
AAKRCK010000001.1	541798	542880	ECU8083958.1	BKI62_02675	GCA_007577105.1	hypothetical protein	VRR_NUC+TM+TM	Salmonella enterica subsp. enterica serovar Cerro	Bacteria; Proteobacteria; Gammaproteobacteria; Enterobacterales; Enterobacteriaceae; Salmonella
AAMIBC010000001.1	479066	480139	EDH5629301.1	CB172_02290	GCA_007577105.1	hypothetical protein	Tox-PAAR-like	Salmonella enterica subsp. enterica serovar Claibornei	Bacteria; Proteobacteria; Gammaproteobacteria; Enterobacterales; Enterobacteriaceae; Salmonella
AAMISP010000007.1	37251	38777	EDH7633140.1	CB562_07465	GCA_000002165.1	hypothetical protein	VRR_NUC+TM+TM	Salmonella enterica subsp. enterica serovar Togba	Bacteria; Proteobacteria; Gammaproteobacteria; Enterobacterales; Enterobacteriaceae; Salmonella
AANPCS010000040.1	1	446	EDP8709120.1	FPE29_004414	GCA_000004655.2	hypothetical protein		Salmonella bongori	Bacteria; Proteobacteria; Gammaproteobacteria; Enterobacterales; Enterobacteriaceae; Salmonella
AEXE01001908.1	3822	4268	EGD00512.1	B1M_31205	GCA_000151175.1	putative bacteriophage gp30 protein	VRR_NUC	Burkholderia sp. TJI49	Bacteria; Proteobacteria; Betaproteobacteria; Burkholderiales; Burkholderiaceae; Burkholderia
AFMO01000144.1	5576	6210	EGL73030.1	CSE899_08414	GCA_000145765.1	hypothetical protein	VRR_NUC	Cronobacter sakazakii E899	Bacteria; Proteobacteria; Gammaproteobacteria; Enterobacterales; Enterobacteriaceae; Cronobacter
AOKF01001443.1	659	973	EPN59727.1	A245_17158	GCA_000149715.2	hypothetical protein	VRR_NUC	Pseudomonas syringae pv. actinidiae ICMP 19096	Bacteria; Proteobacteria; Gammaproteobacteria; Pseudomonadales; Pseudomonadaceae; Pseudomonas; Pseudomonas syringae
AOKF01001443.1	949	1326	EPN59728.1	A245_17163	GCA_000149715.2	VRR-NUC domain-containing protein		Pseudomonas syringae pv. actinidiae ICMP 19096	Bacteria; Proteobacteria; Gammaproteobacteria; Pseudomonadales; Pseudomonadaceae; Pseudomonas; Pseudomonas syringae
KI973139.1	771413	772513	EUL80267.1	P833_00779	GCA_000512085.1	hypothetical protein		Enterobacter hormaechei	Bacteria; Proteobacteria; Gammaproteobacteria; Enterobacterales; Enterobacteriaceae; Enterobacter; Enterobacter cloacae complex
BJNI01000018.1	80880	81149	GEC32022.1	EFR01_21930	GCA_003433645.1	hypothetical protein		Sinorhizobium fredii	Bacteria; Proteobacteria; Alphaproteobacteria; Hyphomicrobiales; Rhizobiaceae; Sinorhizobium/Ensifer group; Sinorhizobium
DRHT01000009.1	1950	3239	HEC50551.1	ENI21_01460	GCA_000277445.1	VRR-NUC domain-containing protein	VRR_NUC+TM+TM	Pseudomonas sabulinigri	Bacteria; Proteobacteria; Gammaproteobacteria; Pseudomonadales; Pseudomonadaceae; Pseudomonas
DROS01000078.1	24	470	HHI94262.1	ENK04_12230	GCA_000277445.1	hypothetical protein	TM	Gammaproteobacteria bacterium	Bacteria; Proteobacteria; Gammaproteobacteria
WAFH01000050.1	1	655	KAB0987846.1	FZI32_21350	GCA_000277445.1	VRR-NUC domain-containing protein		Cronobacter sakazakii	Bacteria; Proteobacteria; Gammaproteobacteria; Enterobacterales; Enterobacteriaceae; Cronobacter
WNDP01000017.1	17360	18361	KAF1026840.1	GAK29_01035	GCA_000277445.1	hypothetical protein	SP+RE_Bpu10I+VRR_NUC	Acinetobacter bereziniae	Bacteria; Proteobacteria; Gammaproteobacteria; Moraxellales; Moraxellaceae; Acinetobacter
JASC01000003.1	230075	231025	KIN70842.1	Z945_3306	GCA_000622365.1	VRR-NUC domain-containing protein	VRR_NUC	Sulfitobacter noctilucae	Bacteria; Proteobacteria; Alphaproteobacteria; Rhodobacterales; Roseobacteraceae; Sulfitobacter
JELZ01001811.1	3714	5924	KYF73145.1	BE11_43665	GCA_000250965.2	hypothetical protein	Phage_GPD+Phage_base_V+VRR_NUC	Sorangium cellulosum	Bacteria; Proteobacteria; Deltaproteobacteria; Myxococcales; Sorangiineae; Polyangiaceae; Sorangium
JEMB01000851.1	3064	3753	KYF93041.1	BE17_08095	GCA_000250965.2	hypothetical protein	VRR_NUC	Sorangium cellulosum	Bacteria; Proteobacteria; Deltaproteobacteria; Myxococcales; Sorangiineae; Polyangiaceae; Sorangium
NZAE01000019.1	23029	24108	MAF01515.1	CME86_03760	GCA_001635005.1	hypothetical protein	Tox-PAAR-like	Herbaspirillum sp.	Bacteria; Proteobacteria; Betaproteobacteria; Burkholderiales; Oxalobacteraceae; Herbaspirillum
NZAE01000070.1	131480	132469	MAF05786.1	CME86_25700	GCA_001635005.1	hypothetical protein	VRR_NUC+TM+TM	Herbaspirillum sp.	Bacteria; Proteobacteria; Betaproteobacteria; Burkholderiales; Oxalobacteraceae; Herbaspirillum
NZUC01000045.1	56090	57037	MAQ24197.1	CMK83_08235	GCA_002694485.1	hypothetical protein	Tox-PAAR-like	Pseudomonadales bacterium	Bacteria; Proteobacteria; Gammaproteobacteria; Pseudomonadales
RZZO01000001.1	6701	7678	NCC26561.1	EOM22_00030	GCF_015227675.2	DUF4150 domain-containing protein	Tox-PAAR-like	Gammaproteobacteria bacterium	Bacteria; Proteobacteria; Gammaproteobacteria
SPEX01000035.1	43387	44142	MPT04366.1	E2582_09085	GCF_015227675.2	hypothetical protein		Delftia sp.	Bacteria; Proteobacteria; Betaproteobacteria; Burkholderiales; Comamonadaceae; Delftia
VNWZ01000159.1	1	314	MXE26505.1	FQZ41_25445	GCF_015227675.2	VRR-NUC domain-containing protein	VRR_NUC	Escherichia coli	Bacteria; Proteobacteria; Gammaproteobacteria; Enterobacterales; Enterobacteriaceae; Escherichia
MAZC01001264.1	49	597	ODN63993.1	BA763_00645	GCA_001661325.1	hypothetical protein	VRR_NUC	Burkholderia cenocepacia	Bacteria; Proteobacteria; Betaproteobacteria; Burkholderiales; Burkholderiaceae; Burkholderia; Burkholderia cepacia complex
MEFM01000029.1	101254	102321	ODU14090.1	ABS94_24180	GCA_001633215.2	hypothetical protein	VRR_NUC	Variovorax sp. SCN 67-85	Bacteria; Proteobacteria; Betaproteobacteria; Burkholderiales; Comamonadaceae; Variovorax
MUZF01000019.1	83058	84323	OUE46504.1	BZY94_08540	GCA_002148645.1	nuclease	TM+TM+VRR_NUC+TM+TM	Burkholderia territorii	Bacteria; Proteobacteria; Betaproteobacteria; Burkholderiales; Burkholderiaceae; Burkholderia; Burkholderia cepacia complex
NBZE01000013.1	242852	243949	OVE94288.1	B7W85_12000	GCA_002163245.1	hypothetical protein	Tox-PAAR-like	Agrobacterium vitis	Bacteria; Proteobacteria; Alphaproteobacteria; Hyphomicrobiales; Rhizobiaceae; Rhizobium/Agrobacterium group; Agrobacterium
NGKL01000831.1	2691	3422	OXH87839.1	CA831_19455	GCA_000599465.2	hypothetical protein	VRR_NUC	Burkholderia multivorans	Bacteria; Proteobacteria; Betaproteobacteria; Burkholderiales; Burkholderiaceae; Burkholderia; Burkholderia cepacia complex
NKIG01000007.1	109864	110730	OYU07523.1	CFE47_11050	GCA_002255865.1	VRR-NUC domain protein	SP+VRR_NUC	Pseudomonas sp. PGPPP1	Bacteria; Proteobacteria; Gammaproteobacteria; Pseudomonadales; Pseudomonadaceae; Pseudomonas
NKIG01000022.1	87627	88505	OYU05393.1	CFE47_22240	GCA_002255865.1	VRR-NUC domain protein	VRR_NUC	Pseudomonas sp. PGPPP1	Bacteria; Proteobacteria; Gammaproteobacteria; Pseudomonadales; Pseudomonadaceae; Pseudomonas
NVER01000989.1	23	418	PFW54756.1	COL27_32840	GCA_001272575.2	VRR-NUC domain-containing protein	VRR_NUC	Bacillus sp. AFS075960	Bacteria; Firmicutes; Bacilli; Bacillales; Bacillaceae; Bacillus
PEEY01000001.1	5356138	5357424	PIF52509.1	CLU80_4986	GCA_002284835.2	VRR-NUC domain-containing protein	VRR_NUC+TM+TM	[Flavobacterium] sp. 29	Bacteria; Proteobacteria; Gammaproteobacteria; Pseudomonadales; Pseudomonadaceae
PEKQ01000751.1	1	1174	PJI54307.1	CTI14_16950	GCA_002751115.2	hypothetical protein	VRR_NUC	Methylobacterium radiotolerans	Bacteria; Proteobacteria; Alphaproteobacteria; Rhizobiales; Methylobacteriaceae; Methylobacterium
PEKQ01000753.1	1	526	PJI54303.1	CTI14_16980	GCA_002751115.2	hypothetical protein	VRR_NUC	Methylobacterium radiotolerans	Bacteria; Proteobacteria; Alphaproteobacteria; Rhizobiales; Methylobacteriaceae; Methylobacterium
PUWX01000001.1	1	1102	PQQ39609.1	C6H68_00005	GCA_001682635.1	VRR-NUC domain-containing protein	VRR_NUC+TM+TM	Photorhabdus luminescens	Bacteria; Proteobacteria; Gammaproteobacteria; Enterobacterales; Morganellaceae; Photorhabdus
PUWX01000041.1	1	402	PQQ36564.1	C6H68_18475	GCA_001682635.1	VRR-NUC domain-containing protein		Photorhabdus luminescens	Bacteria; Proteobacteria; Gammaproteobacteria; Enterobacterales; Morganellaceae; Photorhabdus
PUWX01000056.1	34666	35085	PQQ35981.1	C6H68_22015	GCA_001682635.1	VRR-NUC domain-containing protein	VRR_NUC	Photorhabdus luminescens	Bacteria; Proteobacteria; Gammaproteobacteria; Enterobacterales; Morganellaceae; Photorhabdus
QAJF01000795.1	114	1682	PTT84671.1	DBR42_14860	GCA_002846915.2	hypothetical protein	SP	Pelomonas sp. HMWF004	Bacteria; Proteobacteria; Betaproteobacteria; Burkholderiales; Comamonadaceae; Pelomonas
CP050260.1	1951997	1952836	QIQ71406.1	HBB04_01773	GCA_003184825.1	hypothetical protein	VRR_NUC+DUF3396	Pseudomonas coronafaciens	Bacteria; Proteobacteria; Gammaproteobacteria; Pseudomonadales; Pseudomonadaceae; Pseudomonas
QNMH01001621.1	1	625	RBC70068.1	BRM96_25040	GCA_003290285.1	VRR-NUC domain-containing protein	VRR_NUC	Xanthomonas oryzae pv. oryzae	Bacteria; Proteobacteria; Gammaproteobacteria; Xanthomonadales; Xanthomonadaceae; Xanthomonas
QNMK01001057.1	1	575	RBC75712.1	BRM99_15510	GCA_003290285.1	VRR-NUC domain-containing protein	VRR_NUC	Xanthomonas oryzae pv. oryzae	Bacteria; Proteobacteria; Gammaproteobacteria; Xanthomonadales; Xanthomonadaceae; Xanthomonas
QNMN01001548.1	2467	2922	RBC90980.1	BRN02_24440	GCA_003290285.1	VRR-NUC domain-containing protein	VRR_NUC	Xanthomonas oryzae pv. oryzae	Bacteria; Proteobacteria; Gammaproteobacteria; Xanthomonadales; Xanthomonadaceae; Xanthomonas
QNMW01000947.1	1	656	RBC40237.1	BRN12_16075	GCA_003290285.1	VRR-NUC domain-containing protein	VRR_NUC	Xanthomonas oryzae pv. oryzae	Bacteria; Proteobacteria; Gammaproteobacteria; Xanthomonadales; Xanthomonadaceae; Xanthomonas
QNMZ01000905.1	1	640	RBC59139.1	BRN15_15530	GCA_003290285.1	VRR-NUC domain-containing protein	VRR_NUC	Xanthomonas oryzae pv. oryzae	Bacteria; Proteobacteria; Gammaproteobacteria; Xanthomonadales; Xanthomonadaceae; Xanthomonas
QNNB01001327.1	1	470	RBC36425.1	BRN17_20765	GCA_003290285.1	VRR-NUC domain-containing protein	VRR_NUC	Xanthomonas oryzae pv. oryzae	Bacteria; Proteobacteria; Gammaproteobacteria; Xanthomonadales; Xanthomonadaceae; Xanthomonas
QNNS01001436.1	1	382	RBC18470.1	BRN37_22440	GCA_003290285.1	VRR-NUC domain-containing protein	VRR_NUC	Xanthomonas oryzae pv. oryzae	Bacteria; Proteobacteria; Gammaproteobacteria; Xanthomonadales; Xanthomonadaceae; Xanthomonas
QNNV01001261.1	1	375	RBC40809.1	BRN41_17225	GCA_003290285.1	VRR-NUC domain-containing protein	VRR_NUC	Xanthomonas oryzae pv. oryzae	Bacteria; Proteobacteria; Gammaproteobacteria; Xanthomonadales; Xanthomonadaceae; Xanthomonas
QNPS01001182.1	2709	3054	RBC10737.1	BRO02_15175	GCA_003290285.1	VRR-NUC domain-containing protein	VRR_NUC	Xanthomonas oryzae pv. oryzae	Bacteria; Proteobacteria; Gammaproteobacteria; Xanthomonadales; Xanthomonadaceae; Xanthomonas
QNHV01001093.1	2717	3319	RBE82454.1	BRL73_16765	GCA_003294595.1	VRR-NUC domain-containing protein	SP+VRR_NUC	Xanthomonas oryzae pv. oryzae	Bacteria; Proteobacteria; Gammaproteobacteria; Xanthomonadales; Xanthomonadaceae; Xanthomonas
QNID01001078.1	2717	3373	RBE93382.1	BRL81_17155	GCA_003294595.1	VRR-NUC domain-containing protein	VRR_NUC	Xanthomonas oryzae pv. oryzae	Bacteria; Proteobacteria; Gammaproteobacteria; Xanthomonadales; Xanthomonadaceae; Xanthomonas
QNJI01001307.1	1	537	RBD89210.1	BRM14_21905	GCA_003294595.1	VRR-NUC domain-containing protein	VRR_NUC	Xanthomonas oryzae pv. oryzae	Bacteria; Proteobacteria; Gammaproteobacteria; Xanthomonadales; Xanthomonadaceae; Xanthomonas
QNJK01000954.1	1	631	RBD92572.1	BRM16_13695	GCA_003294595.1	VRR-NUC domain-containing protein	VRR_NUC	Xanthomonas oryzae pv. oryzae	Bacteria; Proteobacteria; Gammaproteobacteria; Xanthomonadales; Xanthomonadaceae; Xanthomonas
QNJY01001184.1	1	649	RBD92319.1	BRM30_17320	GCA_003294595.1	VRR-NUC domain-containing protein	VRR_NUC	Xanthomonas oryzae pv. oryzae	Bacteria; Proteobacteria; Gammaproteobacteria; Xanthomonadales; Xanthomonadaceae; Xanthomonas
QNKS01001496.1	1	660	RBE25593.1	BRM50_24980	GCA_003294595.1	VRR-NUC domain-containing protein	VRR_NUC	Xanthomonas oryzae pv. oryzae	Bacteria; Proteobacteria; Gammaproteobacteria; Xanthomonadales; Xanthomonadaceae; Xanthomonas
QNKU01001296.1	1	617	RBD49374.1	BRM52_22190	GCA_003294595.1	VRR-NUC domain-containing protein	SP+VRR_NUC	Xanthomonas oryzae pv. oryzae	Bacteria; Proteobacteria; Gammaproteobacteria; Xanthomonadales; Xanthomonadaceae; Xanthomonas
QNLL01001430.1	1	310	RBC97026.1	BRM70_15980	GCA_003294595.1	VRR-NUC domain-containing protein	VRR_NUC	Xanthomonas oryzae pv. oryzae	Bacteria; Proteobacteria; Gammaproteobacteria; Xanthomonadales; Xanthomonadaceae; Xanthomonas
QNLS01001259.1	1	481	RBD07311.1	BRM79_17575	GCA_003294595.1	VRR-NUC domain-containing protein	VRR_NUC	Xanthomonas oryzae pv. oryzae	Bacteria; Proteobacteria; Gammaproteobacteria; Xanthomonadales; Xanthomonadaceae; Xanthomonas
QNNW01001692.1	1	344	RBD00995.1	BRN42_24780	GCA_003294595.1	VRR-NUC domain-containing protein	VRR_NUC	Xanthomonas oryzae pv. oryzae	Bacteria; Proteobacteria; Gammaproteobacteria; Xanthomonadales; Xanthomonadaceae; Xanthomonas
QNJF01001067.1	1	425	RBH34656.1	BRM11_15985	GCA_003296005.1	VRR-NUC domain-containing protein	VRR_NUC	Xanthomonas oryzae pv. oryzae	Bacteria; Proteobacteria; Gammaproteobacteria; Xanthomonadales; Xanthomonadaceae; Xanthomonas
QNKK01001308.1	1	402	RBG51136.1	BRM42_21760	GCA_003296005.1	VRR-NUC domain-containing protein	VRR_NUC	Xanthomonas oryzae pv. oryzae	Bacteria; Proteobacteria; Gammaproteobacteria; Xanthomonadales; Xanthomonadaceae; Xanthomonas
QNKR01001066.1	1	579	RBG36509.1	BRM49_14390	GCA_003296005.1	VRR-NUC domain-containing protein	VRR_NUC	Xanthomonas oryzae pv. oryzae	Bacteria; Proteobacteria; Gammaproteobacteria; Xanthomonadales; Xanthomonadaceae; Xanthomonas
QNLR01001324.1	1	660	RBF96050.1	BRM76_23440	GCA_003296005.1	VRR-NUC domain-containing protein	VRR_NUC	Xanthomonas oryzae pv. oryzae	Bacteria; Proteobacteria; Gammaproteobacteria; Xanthomonadales; Xanthomonadaceae; Xanthomonas
QNLU01001200.1	1	657	RBG64511.1	BRM82_21145	GCA_003296005.1	VRR-NUC domain-containing protein	VRR_NUC	Xanthomonas oryzae pv. oryzae	Bacteria; Proteobacteria; Gammaproteobacteria; Xanthomonadales; Xanthomonadaceae; Xanthomonas
QNLV01001541.1	2467	2872	RBF83272.1	BRM83_23330	GCA_003296005.1	VRR-NUC domain-containing protein	VRR_NUC	Xanthomonas oryzae pv. oryzae	Bacteria; Proteobacteria; Gammaproteobacteria; Xanthomonadales; Xanthomonadaceae; Xanthomonas
QNMD01001266.1	2758	3452	RBF20339.1	BRM92_23675	GCA_003296005.1	VRR-NUC domain-containing protein	VRR_NUC	Xanthomonas oryzae pv. oryzae	Bacteria; Proteobacteria; Gammaproteobacteria; Xanthomonadales; Xanthomonadaceae; Xanthomonas
QNMF01001306.1	1	678	RBE99134.1	BRM94_22600	GCA_003296005.1	VRR-NUC domain-containing protein	VRR_NUC	Xanthomonas oryzae pv. oryzae	Bacteria; Proteobacteria; Gammaproteobacteria; Xanthomonadales; Xanthomonadaceae; Xanthomonas
QNMG01001079.1	2700	3342	RBF84307.1	BRM95_15560	GCA_003296005.1	VRR-NUC domain-containing protein	VRR_NUC	Xanthomonas oryzae pv. oryzae	Bacteria; Proteobacteria; Gammaproteobacteria; Xanthomonadales; Xanthomonadaceae; Xanthomonas
QNML01001532.1	2467	2886	RBF01658.1	BRN00_23950	GCA_003296005.1	VRR-NUC domain-containing protein	VRR_NUC	Xanthomonas oryzae pv. oryzae	Bacteria; Proteobacteria; Gammaproteobacteria; Xanthomonadales; Xanthomonadaceae; Xanthomonas
QNHX01000948.1	1	486	RBI86072.1	BRL75_14450	GCA_002909875.2	VRR-NUC domain-containing protein	VRR_NUC	Xanthomonas oryzae pv. oryzae	Bacteria; Proteobacteria; Gammaproteobacteria; Xanthomonadales; Xanthomonadaceae; Xanthomonas
QNIU01001178.1	2667	3156	RBI44558.1	BRL99_16600	GCA_002909875.2	VRR-NUC domain-containing protein	VRR_NUC	Xanthomonas oryzae pv. oryzae	Bacteria; Proteobacteria; Gammaproteobacteria; Xanthomonadales; Xanthomonadaceae; Xanthomonas
QNJZ01001545.1	2758	3258	RBH51496.1	BRM31_24355	GCA_002909875.2	VRR-NUC domain-containing protein	VRR_NUC	Xanthomonas oryzae pv. oryzae	Bacteria; Proteobacteria; Gammaproteobacteria; Xanthomonadales; Xanthomonadaceae; Xanthomonas
QNKB01001193.1	1	614	RBH64997.1	BRM33_16800	GCA_002909875.2	VRR-NUC domain-containing protein	SP+VRR_NUC	Xanthomonas oryzae pv. oryzae	Bacteria; Proteobacteria; Gammaproteobacteria; Xanthomonadales; Xanthomonadaceae; Xanthomonas
QNNK01001278.1	1	636	RBK96507.1	BRN27_21710	GCA_002909875.2	VRR-NUC domain-containing protein	VRR_NUC	Xanthomonas oryzae pv. oryzae	Bacteria; Proteobacteria; Gammaproteobacteria; Xanthomonadales; Xanthomonadaceae; Xanthomonas
QNNT01001278.1	1	296	RBK94861.1	BRN38_16430	GCA_002909875.2	VRR-NUC domain-containing protein	VRR_NUC	Xanthomonas oryzae pv. oryzae	Bacteria; Proteobacteria; Gammaproteobacteria; Xanthomonadales; Xanthomonadaceae; Xanthomonas
QNNZ01001333.1	2467	2942	RBL05929.1	BRN45_22815	GCA_002909875.2	VRR-NUC domain-containing protein	VRR_NUC	Xanthomonas oryzae pv. oryzae	Bacteria; Proteobacteria; Gammaproteobacteria; Xanthomonadales; Xanthomonadaceae; Xanthomonas
QNOZ01000951.1	2709	3229	RBK17478.1	BRN80_14215	GCA_002909875.2	VRR-NUC domain-containing protein	VRR_NUC	Xanthomonas oryzae pv. oryzae	Bacteria; Proteobacteria; Gammaproteobacteria; Xanthomonadales; Xanthomonadaceae; Xanthomonas
QNPO01000824.1	2806	3432	RBJ93121.1	BRN98_13620	GCA_002909875.2	VRR-NUC domain-containing protein	VRR_NUC	Xanthomonas oryzae pv. oryzae	Bacteria; Proteobacteria; Gammaproteobacteria; Xanthomonadales; Xanthomonadaceae; Xanthomonas
QNNI01001059.1	1	385	RBL59860.1	BRN25_15305	GCA_001633055.2	VRR-NUC domain-containing protein	VRR_NUC	Xanthomonas oryzae pv. oryzae	Bacteria; Proteobacteria; Gammaproteobacteria; Xanthomonadales; Xanthomonadaceae; Xanthomonas
PVZK01000866.1	987	1280	RJY19617.1	C6381_29650	GCA_003599075.1	nuclease	VRR_NUC	Pseudomonas syringae pv. actinidiae	Bacteria; Proteobacteria; Gammaproteobacteria; Pseudomonadales; Pseudomonadaceae; Pseudomonas; Pseudomonas syringae
RBKF01001484.1	1	1199	RKV70705.1	D8H97_32530	GCA_003638715.1	hypothetical protein	VRR_NUC+TM	Neisseria sp.	Bacteria; Proteobacteria; Betaproteobacteria; Neisseriales; Neisseriaceae; Neisseria
QWDM01000132.1	1	339	RUT67616.1	D0817_25515	GCA_003996965.1	VRR-NUC domain-containing protein	VRR_NUC	Flavobacterium cupreum	Bacteria; Bacteroidetes; Flavobacteriia; Flavobacteriales; Flavobacteriaceae; Flavobacterium
SEDR01003683.1	920	1510	RZA04307.1	EOP02_40875	GCA_004170445.1	VRR-NUC domain-containing protein	VRR_NUC	Proteobacteria bacterium	Bacteria; Proteobacteria
SEFA01000068.1	12618	13565	RZI57095.1	EOP37_21650	GCA_004210455.1	DUF4150 domain-containing protein	Tox-PAAR-like	Rubrivivax sp.	Bacteria; Proteobacteria; Betaproteobacteria; Burkholderiales; Rubrivivax
UASD01000008.1	1693910	1694683	SPX12656.1	NCTC9073_04032	GCA_900248185.2	VRR-NUC domain	VRR_NUC	Escherichia coli	Bacteria; Proteobacteria; Gammaproteobacteria; Enterobacterales; Enterobacteriaceae; Escherichia
UFMO01000003.1	155300	155899	SST08170.1	SAMEA104305315_01416	GCA_900475435.1	VRR-NUC domain	VRR_NUC+TM	Acinetobacter baumannii	Bacteria; Proteobacteria; Gammaproteobacteria; Moraxellales; Moraxellaceae; Acinetobacter; Acinetobacter calcoaceticus/baumannii complex
UFZQ01000001.1	3139646	3140530	STE86976.1	NCTC10418_04635	GCA_900446945.1	VRR-NUC domain	VRR_NUC+TM+TM	Escherichia coli	Bacteria; Proteobacteria; Gammaproteobacteria; Enterobacterales; Enterobacteriaceae; Escherichia
UFZQ01000001.1	3140484	3140936	STE86977.1	NCTC10418_04636	GCA_900446945.1	Uncharacterised protein		Escherichia coli	Bacteria; Proteobacteria; Gammaproteobacteria; Enterobacterales; Enterobacteriaceae; Escherichia
UGMW01000003.1	2450580	2451512	STV88466.1	NCTC9161_03222	GCA_900448955.1	VRR-NUC domain	VRR_NUC	Klebsiella michiganensis	Bacteria; Proteobacteria; Gammaproteobacteria; Enterobacterales; Enterobacteriaceae; Klebsiella/Raoultella group; Klebsiella
UGWZ01000001.1	907051	907890	SUG13522.1	NCTC7295_01101	GCA_900448955.1	VRR-NUC domain	VRR_NUC	Salmonella enterica subsp. arizonae	Bacteria; Proteobacteria; Gammaproteobacteria; Enterobacterales; Enterobacteriaceae; Salmonella
SCRN01000033.1	105220	105948	TAM51519.1	EPN57_17295	GCA_004298425.1	VRR-NUC domain-containing protein	VRR_NUC	Paraburkholderia sp.	Bacteria; Proteobacteria; Betaproteobacteria; Burkholderiales; Burkholderiaceae; Paraburkholderia
QGAB01000030.1	38939	39384	TKJ95275.1	PflCFBP13510_28865	GCA_000757645.3	VRR-NUC domain protein	VRR_NUC	Pseudomonas fluorescens	Bacteria; Proteobacteria; Gammaproteobacteria; Pseudomonadales; Pseudomonadaceae; Pseudomonas
QGAB01000040.1	1	443	TKJ92621.1	PflCFBP13510_29520	GCA_000757645.3	VRR-NUC domain protein	VRR_NUC	Pseudomonas fluorescens	Bacteria; Proteobacteria; Gammaproteobacteria; Pseudomonadales; Pseudomonadaceae; Pseudomonas
PDUM01000224.1	2321	2982	TNC83565.1	CSH49_20945	GCA_006212105.1	hypothetical protein	Tox-PAAR-like+VRR_NUC	Alcanivorax sp.	Bacteria; Proteobacteria; Gammaproteobacteria; Oceanospirillales; Alcanivoracaceae; Alcanivorax
QFVF01000234.1	1	414	TYF66343.1	DJ537_25445	GCA_005930515.1	VRR-NUC domain-containing protein		Enterobacter hormaechei	Bacteria; Proteobacteria; Gammaproteobacteria; Enterobacterales; Enterobacteriaceae; Enterobacter; Enterobacter cloacae complex
SSEJ01000222.1	1102	2109	TXH13986.1	E6R00_09475	GCA_005930515.1	hypothetical protein	TM+TM	Gammaproteobacteria bacterium	Bacteria; Proteobacteria; Gammaproteobacteria
UNUS01000002.1	403766	404866	VAF30169.1	SAMEA2053935_01262	GCA_005930515.1	Uncharacterised protein		Enterobacter hormaechei	Bacteria; Proteobacteria; Gammaproteobacteria; Enterobacterales; Enterobacteriaceae; Enterobacter; Enterobacter cloacae complex
CABFZN010000868.1	6584	7906	VUJ69319.1	FGGCPDNJ_01317	GCF_000461675.1	hypothetical protein	VRR_NUC	Stenotrophomonas maltophilia	Bacteria; Proteobacteria; Gammaproteobacteria; Xanthomonadales; Xanthomonadaceae; Stenotrophomonas; Stenotrophomonas maltophilia group
NC_010067.1	53630	54919	WP_000425774.1	SARI_RS00235	GCF_000018625.1	VRR-NUC domain-containing protein	VRR_NUC+TM+TM	Salmonella enterica subsp. arizonae serovar 62:z4,z23:-	Bacteria; Proteobacteria; Gammaproteobacteria; Enterobacterales; Enterobacteriaceae; Salmonella
NZ_JH768571.1	1665938	1667221	WP_000425776.1	ESTG_RS17110	GCF_000261385.1	VRR-NUC domain-containing protein	VRR_NUC+TM+TM	Escherichia coli B799	Bacteria; Proteobacteria; Gammaproteobacteria; Enterobacterales; Enterobacteriaceae; Escherichia
NZ_GG704579.1	88082	89080	WP_000938194.1	HMPREF0010_RS20840	GCF_000162295.1	hypothetical protein	RE_Bpu10I+VRR_NUC	Acinetobacter baumannii ATCC 19606 = CIP 70.34 = JCM 6841	Bacteria; Proteobacteria; Gammaproteobacteria; Moraxellales; Moraxellaceae; Acinetobacter; Acinetobacter calcoaceticus/baumannii complex
NZ_KB732784.1	30550	31833	WP_001562582.1	A1UM_RS10095	GCF_000351685.1	VRR-NUC domain-containing protein	VRR_NUC+TM+TM	Escherichia coli KTE75	Bacteria; Proteobacteria; Gammaproteobacteria; Enterobacterales; Enterobacteriaceae; Escherichia
NZ_AMGA01000050.1	88512	89510	WP_002069768.1	ACINAA014_RS17900	GCF_000335595.1	hypothetical protein	RE_Bpu10I+VRR_NUC	Acinetobacter baumannii AA-014	Bacteria; Proteobacteria; Gammaproteobacteria; Moraxellales; Moraxellaceae; Acinetobacter; Acinetobacter calcoaceticus/baumannii complex
NC_008463.1	4758235	4758936	WP_003111822.1	PA14_RS21840	GCF_000014625.1	VRR-NUC domain-containing protein	VRR_NUC+TM	Pseudomonas aeruginosa UCBPP-PA14	Bacteria; Proteobacteria; Gammaproteobacteria; Pseudomonadales; Pseudomonadaceae; Pseudomonas
NZ_KI518709.1	711219	711665	WP_003114211.1	Q088_RS39915	GCF_000480455.1	VRR-NUC domain-containing protein	VRR_NUC	Pseudomonas aeruginosa C41	Bacteria; Proteobacteria; Gammaproteobacteria; Pseudomonadales; Pseudomonadaceae; Pseudomonas
NZ_KI518709.1	711687	711920	WP_003114212.1	Q088_RS39920	GCF_000480455.1	hypothetical protein		Pseudomonas aeruginosa C41	Bacteria; Proteobacteria; Gammaproteobacteria; Pseudomonadales; Pseudomonadaceae; Pseudomonas
NZ_DF126593.1	1117775	1118476	WP_003159604.1	NCGM1179_RS05460	GCF_000291745.1	VRR-NUC domain-containing protein	VRR_NUC+TM	Pseudomonas aeruginosa NCMG1179	Bacteria; Proteobacteria; Gammaproteobacteria; Pseudomonadales; Pseudomonadaceae; Pseudomonas
NZ_GL385099.1	24237	24962	WP_003380323.1	PSYAC_RS13475	GCF_000145865.1	VRR-NUC domain-containing protein	VRR_NUC	Pseudomonas syringae pv. actinidiae str. M302091	Bacteria; Proteobacteria; Gammaproteobacteria; Pseudomonadales; Pseudomonadaceae; Pseudomonas; Pseudomonas syringae
NZ_AMWL02000023.1	6139	7584	WP_004241478.1	C790_RS14790	GCF_000307755.2	VRR-NUC domain-containing protein	VRR_NUC+TM+TM	Morganella morganii SC01	Bacteria; Proteobacteria; Gammaproteobacteria; Enterobacterales; Morganellaceae; Morganella
NZ_AGVZ01000006.1	382252	383388	WP_004431498.1	AT5A_RS27340	GCF_000236125.1	DUF4150 domain-containing protein	Tox-PAAR-like	Agrobacterium tumefaciens 5A	Bacteria; Proteobacteria; Alphaproteobacteria; Hyphomicrobiales; Rhizobiaceae; Rhizobium/Agrobacterium group; Agrobacterium; Agrobacterium tumefaciens complex
NZ_CH899741.1	97429	98190	WP_004530417.1	BURPSPAST_RS03340	GCF_000152345.1	VRR-NUC domain-containing protein	VRR_NUC	Burkholderia pseudomallei Pasteur 52237	Bacteria; Proteobacteria; Betaproteobacteria; Burkholderiales; Burkholderiaceae; Burkholderia; pseudomallei group
NZ_CH899760.1	557998	558735	WP_004532838.1	BURPSS13_RS03970	GCF_000152365.1	VRR-NUC domain-containing protein	VRR_NUC	Burkholderia pseudomallei S13	Bacteria; Proteobacteria; Betaproteobacteria; Burkholderiales; Burkholderiaceae; Burkholderia; pseudomallei group
NC_006351.1	534439	535173	WP_004552313.1	BPS_RS20805	GCF_000011545.1	VRR-NUC domain-containing protein	VRR_NUC	Burkholderia pseudomallei K96243	Bacteria; Proteobacteria; Betaproteobacteria; Burkholderiales; Burkholderiaceae; Burkholderia; pseudomallei group
NZ_AAYX01000010.1	141947	143206	WP_004542098.1	BURPS305_RS22385	GCF_000169715.1	VRR-NUC domain-containing protein	VRR_NUC+TM+TM	Burkholderia pseudomallei 305	Bacteria; Proteobacteria; Betaproteobacteria; Burkholderiales; Burkholderiaceae; Burkholderia; pseudomallei group
NZ_ACCE01000002.1	969763	970524	WP_004543898.1	BUC_RS08210	GCF_000182195.1	VRR-NUC domain-containing protein	VRR_NUC	Burkholderia pseudomallei 576	Bacteria; Proteobacteria; Betaproteobacteria; Burkholderiales; Burkholderiaceae; Burkholderia; pseudomallei group
NC_007434.1	1821685	1822419	WP_004552924.1	BURPS1710B_RS33185	GCF_000012785.1	VRR-NUC domain-containing protein	VRR_NUC	Burkholderia pseudomallei 1710b	Bacteria; Proteobacteria; Betaproteobacteria; Burkholderiales; Burkholderiaceae; Burkholderia; pseudomallei group
NZ_KB849143.1	630609	631607	WP_004640428.1	F997_RS04650	GCF_000367865.1	hypothetical protein	RE_Bpu10I	Acinetobacter calcoaceticus NIPH 13	Bacteria; Proteobacteria; Gammaproteobacteria; Moraxellales; Moraxellaceae; Acinetobacter; Acinetobacter calcoaceticus/baumannii complex
NZ_AMFQ01000099.1	172	909	WP_004825130.1	ACINWC743_RS14820	GCF_000335555.1	VRR-NUC domain-containing protein	VRR_NUC	Acinetobacter sp. WC-743	Bacteria; Proteobacteria; Gammaproteobacteria; Moraxellales; Moraxellaceae; Acinetobacter
NZ_KB849456.1	2615671	2616672	WP_004821893.1	F964_RS16335	GCF_000368485.1	hypothetical protein	SP+RE_Bpu10I+VRR_NUC	Acinetobacter guillouiae NIPH 991	Bacteria; Proteobacteria; Gammaproteobacteria; Moraxellales; Moraxellaceae; Acinetobacter
NZ_KB849466.1	546581	547594	WP_004828459.1	F963_RS10100	GCF_000368505.1	hypothetical protein	TM+TM	Acinetobacter bereziniae NIPH 3	Bacteria; Proteobacteria; Gammaproteobacteria; Moraxellales; Moraxellaceae; Acinetobacter
NZ_KB849467.1	858808	859521	WP_004830017.1	F963_RS14650	GCF_000368505.1	VRR-NUC domain-containing protein	VRR_NUC	Acinetobacter bereziniae NIPH 3	Bacteria; Proteobacteria; Gammaproteobacteria; Moraxellales; Moraxellaceae; Acinetobacter
NZ_KB849643.1	2493684	2494682	WP_004947351.1	F950_RS12070	GCF_000368725.1	hypothetical protein	RE_Bpu10I+VRR_NUC	Acinetobacter soli NIPH 2899	Bacteria; Proteobacteria; Gammaproteobacteria; Moraxellales; Moraxellaceae; Acinetobacter
NZ_KB849755.1	1109883	1110896	WP_005030650.1	F938_RS07130	GCF_000368925.1	hypothetical protein	TM+TM	Acinetobacter bereziniae LMG 1003 = CIP 70.12	Bacteria; Proteobacteria; Gammaproteobacteria; Moraxellales; Moraxellaceae; Acinetobacter
NZ_KB849756.1	1709389	1710126	WP_005033973.1	F938_RS17760	GCF_000368925.1	VRR-NUC domain-containing protein	VRR_NUC	Acinetobacter bereziniae LMG 1003 = CIP 70.12	Bacteria; Proteobacteria; Gammaproteobacteria; Moraxellales; Moraxellaceae; Acinetobacter
NZ_KB849756.1	1970797	1971771	WP_005034368.1	F938_RS19065	GCF_000368925.1	hypothetical protein	TM	Acinetobacter bereziniae LMG 1003 = CIP 70.12	Bacteria; Proteobacteria; Gammaproteobacteria; Moraxellales; Moraxellaceae; Acinetobacter
NZ_KB849756.1	2832534	2833547	WP_005035612.1	F938_RS23110	GCF_000368925.1	hypothetical protein		Acinetobacter bereziniae LMG 1003 = CIP 70.12	Bacteria; Proteobacteria; Gammaproteobacteria; Moraxellales; Moraxellaceae; Acinetobacter
NZ_JH951477.1	29681	30406	WP_005614972.1	PAV631_RS18685	GCF_000302915.1	VRR-NUC domain-containing protein	VRR_NUC	Pseudomonas avellanae BPIC 631	Bacteria; Proteobacteria; Gammaproteobacteria; Pseudomonadales; Pseudomonadaceae; Pseudomonas
NZ_GL384710.1	765468	766193	WP_005736656.1	PSYMP_RS23715	GCF_000145745.1	VRR-NUC domain-containing protein	VRR_NUC	Pseudomonas amygdali pv. morsprunorum str. M302280	Bacteria; Proteobacteria; Gammaproteobacteria; Pseudomonadales; Pseudomonadaceae; Pseudomonas; Pseudomonas amygdali
NZ_ABBM01001031.1	5348	6607	WP_006028925.1	BPSE0005_RS29610	GCF_000170495.1	VRR-NUC domain-containing protein	VRR_NUC+TM+TM	Burkholderia thailandensis MSMB43	Bacteria; Proteobacteria; Betaproteobacteria; Burkholderiales; Burkholderiaceae; Burkholderia; pseudomallei group
NZ_JH692064.1	325942	326706	WP_006027264.1	A33K_RS18130	GCF_000266985.1	VRR-NUC domain-containing protein	VRR_NUC	Burkholderia thailandensis MSMB43	Bacteria; Proteobacteria; Betaproteobacteria; Burkholderiales; Burkholderiaceae; Burkholderia; pseudomallei group
NZ_ALIX01000421.1	8331	9062	WP_006416642.1	BURMUCF2_RS25920	GCF_000286575.1	VRR-NUC domain-containing protein	VRR_NUC	Burkholderia multivorans CF2	Bacteria; Proteobacteria; Betaproteobacteria; Burkholderiales; Burkholderiaceae; Burkholderia; Burkholderia cepacia complex
NZ_KB233231.1	346265	347521	WP_006662544.1	OO9_RS11670	GCF_000314875.2	hypothetical protein		Providencia alcalifaciens Dmel2	Bacteria; Proteobacteria; Gammaproteobacteria; Enterobacterales; Morganellaceae; Providencia
NZ_ABLC01000019.1	29542	30591	WP_006750554.1	BAMIOP4010_RS06570	GCF_000181975.1	DUF4150 domain-containing protein	Tox-PAAR-like	Burkholderia ambifaria IOP40-10	Bacteria; Proteobacteria; Betaproteobacteria; Burkholderiales; Burkholderiaceae; Burkholderia; Burkholderia cepacia complex
NZ_ABLC01000032.1	8792	9520	WP_006751049.1	BAMIOP4010_RS09065	GCF_000181975.1	VRR-NUC domain-containing protein	VRR_NUC	Burkholderia ambifaria IOP40-10	Bacteria; Proteobacteria; Betaproteobacteria; Burkholderiales; Burkholderiaceae; Burkholderia; Burkholderia cepacia complex
NZ_ABLK01000022.1	11687	12391	WP_006757119.1	BAMMEX5DRAFT_RS05545	GCF_000182015.1	VRR-NUC domain-containing protein	VRR_NUC	Burkholderia ambifaria MEX-5	Bacteria; Proteobacteria; Betaproteobacteria; Burkholderiales; Burkholderiaceae; Burkholderia; Burkholderia cepacia complex
NZ_ABLK01000236.1	5715	6980	WP_006761091.1	BAMMEX5DRAFT_RS26355	GCF_000182015.1	VRR-NUC domain-containing protein	TM+TM+VRR_NUC+TM+TM	Burkholderia ambifaria MEX-5	Bacteria; Proteobacteria; Betaproteobacteria; Burkholderiales; Burkholderiaceae; Burkholderia; Burkholderia cepacia complex
NZ_CAKX01000221.1	2968742	2970004	WP_007701766.1	BN136_RS05260	GCF_000319325.1	VRR-NUC domain-containing protein	VRR_NUC	Cronobacter universalis NCTC 9529	Bacteria; Proteobacteria; Gammaproteobacteria; Enterobacterales; Enterobacteriaceae; Cronobacter
NZ_AKJV01000120.1	139966	141252	WP_007919616.1	PMI19_RS27110	GCF_000282155.1	VRR-NUC domain-containing protein	VRR_NUC+TM+TM	Pseudomonas sp. GM16	Bacteria; Proteobacteria; Gammaproteobacteria; Pseudomonadales; Pseudomonadaceae; Pseudomonas
NZ_AKIW01000024.1	12806	13738	WP_007830908.1	PMI12_RS28035	GCF_000282635.1	DUF4150 domain-containing protein	Tox-PAAR-like	Variovorax sp. CF313	Bacteria; Proteobacteria; Betaproteobacteria; Burkholderiales; Comamonadaceae; Variovorax
NZ_AJKV01000037.1	54655	55917	WP_007775394.1	UOM_RS0104540	GCF_000409305.1	VRR-NUC domain-containing protein	VRR_NUC	Cronobacter malonaticus LMG 23826	Bacteria; Proteobacteria; Gammaproteobacteria; Enterobacterales; Enterobacteriaceae; Cronobacter
NZ_AKJT01000054.1	23471	24763	WP_007939148.1	PMI21_RS12235	GCF_000282195.1	VRR-NUC domain-containing protein	VRR_NUC+TM+TM	Pseudomonas sp. GM18	Bacteria; Proteobacteria; Gammaproteobacteria; Pseudomonadales; Pseudomonadaceae; Pseudomonas
NZ_AKJP02000026.1	293673	294965	WP_007962215.1	PMI25_RS16955	GCF_000282275.2	VRR-NUC domain-containing protein	VRR_NUC+TM+TM+TM	Pseudomonas sp. GM30	Bacteria; Proteobacteria; Gammaproteobacteria; Pseudomonadales; Pseudomonadaceae; Pseudomonas
NZ_AJWX01000050.1	3207	4490	WP_008375779.1	PMM47T1_RS29450	GCF_000263855.1	VRR-NUC domain-containing protein	VRR_NUC+TM+TM	Pseudomonas sp. M47T1	Bacteria; Proteobacteria; Gammaproteobacteria; Pseudomonadales; Pseudomonadaceae; Pseudomonas
NZ_AJWX01000053.1	1215	2519	WP_008375812.1	PMM47T1_RS29455	GCF_000263855.1	VRR-NUC domain-containing protein	VRR_NUC+TM+TM	Pseudomonas sp. M47T1	Bacteria; Proteobacteria; Gammaproteobacteria; Pseudomonadales; Pseudomonadaceae; Pseudomonas
NZ_ALNS01000062.1	224	1507	WP_008503534.1	B498_RS00015	GCF_000286655.1	VRR-NUC domain-containing protein	VRR_NUC+TM+TM	Enterobacter sp. SST3	Bacteria; Proteobacteria; Gammaproteobacteria; Enterobacterales; Enterobacteriaceae; Enterobacter; Enterobacter cloacae complex; unclassified Enterobacter cloacae complex
NZ_JH376465.1	172884	173585	WP_009315280.1	HMPREF1030_RS27225	GCF_000233495.1	VRR-NUC domain-containing protein	VRR_NUC+TM	Pseudomonas aeruginosa	Bacteria; Proteobacteria; Gammaproteobacteria; Pseudomonadales; Pseudomonadaceae; Pseudomonas
NZ_ANIR02000002.1	2658880	2659722	WP_009619735.1	PM1_RS30805	GCF_000317185.3	VRR-NUC domain-containing protein	VRR_NUC	Pseudomonas sp. M1	Bacteria; Proteobacteria; Gammaproteobacteria; Pseudomonadales; Pseudomonadaceae; Pseudomonas
NZ_AMFQ01000019.1	36093	37064	WP_009584343.1	ACINWC743_RS03180	GCF_000335555.1	hypothetical protein	TM	Acinetobacter sp. WC-743	Bacteria; Proteobacteria; Gammaproteobacteria; Moraxellales; Moraxellaceae; Acinetobacter
NZ_AMFQ01000071.1	2175	2909	WP_009585216.1	ACINWC743_RS09045	GCF_000335555.1	VRR-NUC domain-containing protein	VRR_NUC	Acinetobacter sp. WC-743	Bacteria; Proteobacteria; Gammaproteobacteria; Moraxellales; Moraxellaceae; Acinetobacter
NZ_AMFQ01000101.1	119310	120323	WP_009586090.1	ACINWC743_RS15905	GCF_000335555.1	hypothetical protein		Acinetobacter sp. WC-743	Bacteria; Proteobacteria; Gammaproteobacteria; Moraxellales; Moraxellaceae; Acinetobacter
NC_007650.1	1605209	1605946	WP_009897075.1	BTH_RS06950	GCF_000012365.1	VRR-NUC domain-containing protein	VRR_NUC	Burkholderia thailandensis E264	Bacteria; Proteobacteria; Betaproteobacteria; Burkholderiales; Burkholderiaceae; Burkholderia; pseudomallei group
NZ_ABBD01000767.1	30927	31676	WP_009906853.1	BTHAI0002_RS31980	GCF_000170315.1	VRR-NUC domain-containing protein	VRR_NUC	Burkholderia thailandensis TXDOH	Bacteria; Proteobacteria; Betaproteobacteria; Burkholderiales; Burkholderiaceae; Burkholderia; pseudomallei group
NZ_ABBH01000763.1	28051	28785	WP_009910372.1	BTHAI0001_RS39225	GCF_000170395.1	VRR-NUC domain-containing protein	VRR_NUC	Burkholderia thailandensis Bt4	Bacteria; Proteobacteria; Betaproteobacteria; Burkholderiales; Burkholderiaceae; Burkholderia; pseudomallei group
NZ_ABBN01001406.1	2521	3270	WP_009961877.1	BPSE0004_RS35005	GCF_000170515.1	VRR-NUC domain-containing protein	VRR_NUC	Burkholderia pseudomallei B7210	Bacteria; Proteobacteria; Betaproteobacteria; Burkholderiales; Burkholderiaceae; Burkholderia; pseudomallei group
NZ_ABBE01000043.1	12864	13634	WP_010089130.1	BUBO0001_RS01040	GCF_000170335.1	VRR-NUC domain-containing protein	VRR_NUC	Burkholderia ubonensis Bu	Bacteria; Proteobacteria; Betaproteobacteria; Burkholderiales; Burkholderiaceae; Burkholderia; Burkholderia cepacia complex
NZ_ABBO01000019.1	26018	26767	WP_009962366.1	BPSE0010_RS00615	GCF_000170535.1	VRR-NUC domain-containing protein	VRR_NUC	Burkholderia pseudomallei 7894	Bacteria; Proteobacteria; Betaproteobacteria; Burkholderiales; Burkholderiaceae; Burkholderia; pseudomallei group
NZ_ABBQ01000743.1	1844	2608	WP_009976630.1	BPSE0002_RS25750	GCF_000170575.1	VRR-NUC domain-containing protein	VRR_NUC	Burkholderia pseudomallei NCTC 13177	Bacteria; Proteobacteria; Betaproteobacteria; Burkholderiales; Burkholderiaceae; Burkholderia; pseudomallei group
NZ_ABBD01000121.1	13846	14580	WP_010109969.1	BTHAI0002_RS33390	GCF_000170315.1	VRR-NUC domain-containing protein	VRR_NUC	Burkholderia thailandensis TXDOH	Bacteria; Proteobacteria; Betaproteobacteria; Burkholderiales; Burkholderiaceae; Burkholderia; pseudomallei group
NZ_ADGB01000048.1	74781	75506	WP_010430376.1	COO_RS0109175	GCF_000177515.1	VRR-NUC domain-containing protein	VRR_NUC	Pseudomonas syringae pv. syringae 642	Bacteria; Proteobacteria; Gammaproteobacteria; Pseudomonadales; Pseudomonadaceae; Pseudomonas; Pseudomonas syringae
NZ_AVEJ02000183.1	152	877	WP_010424928.1	N016_RS0212325	GCF_000452725.1	VRR-NUC domain-containing protein	VRR_NUC	Pseudomonas syringae CC1543	Bacteria; Proteobacteria; Gammaproteobacteria; Pseudomonadales; Pseudomonadaceae; Pseudomonas; Pseudomonas syringae
NZ_AKBD01000125.1	2465	3166	WP_010792101.1	PACIG1_RS09350	GCF_000295475.1	VRR-NUC domain-containing protein	VRR_NUC+TM	Pseudomonas aeruginosa CIG1	Bacteria; Proteobacteria; Gammaproteobacteria; Pseudomonadales; Pseudomonadaceae; Pseudomonas
NZ_KI517354.1	4900867	4901568	WP_010793872.1	HMPREF1224_RS34805	GCF_000478485.2	VRR-NUC domain-containing protein	VRR_NUC+TM	Pseudomonas sp. P179	Bacteria; Proteobacteria; Gammaproteobacteria; Pseudomonadales; Pseudomonadaceae; Pseudomonas
NC_005126.1	495650	497008	WP_011144849.1	PLU_RS02260	GCF_000196155.1	VRR-NUC domain-containing protein	VRR_NUC+TM+TM	Photorhabdus laumondii subsp. laumondii TTO1	Bacteria; Proteobacteria; Gammaproteobacteria; Enterobacterales; Morganellaceae; Photorhabdus
NC_005126.1	951570	952928	WP_011145194.1	PLU_RS04090	GCF_000196155.1	VRR-NUC domain-containing protein	VRR_NUC+TM+TM	Photorhabdus laumondii subsp. laumondii TTO1	Bacteria; Proteobacteria; Gammaproteobacteria; Enterobacterales; Morganellaceae; Photorhabdus
NC_005126.1	956580	957938	WP_011145197.1	PLU_RS04120	GCF_000196155.1	VRR-NUC domain-containing protein	VRR_NUC+TM+TM	Photorhabdus laumondii subsp. laumondii TTO1	Bacteria; Proteobacteria; Gammaproteobacteria; Enterobacterales; Morganellaceae; Photorhabdus
NC_005126.1	1790109	1791467	WP_011145795.1	PLU_RS07545	GCF_000196155.1	VRR-NUC domain-containing protein	VRR_NUC+TM+TM	Photorhabdus laumondii subsp. laumondii TTO1	Bacteria; Proteobacteria; Gammaproteobacteria; Enterobacterales; Morganellaceae; Photorhabdus
NC_006351.1	1434905	1435642	WP_011205520.1	BPS_RS24495	GCF_000011545.1	VRR-NUC domain-containing protein	VRR_NUC	Burkholderia pseudomallei K96243	Bacteria; Proteobacteria; Betaproteobacteria; Burkholderiales; Burkholderiaceae; Burkholderia; pseudomallei group
NC_010717.2	1277853	1278548	WP_011260011.1	PXO_RS05985	GCF_000019585.2	VRR-NUC domain-containing protein	VRR_NUC	Xanthomonas oryzae pv. oryzae PXO99A	Bacteria; Proteobacteria; Gammaproteobacteria; Xanthomonadales; Xanthomonadaceae; Xanthomonas
NC_007650.1	2446043	2446777	WP_011401463.1	BTH_RS10230	GCF_000012365.1	VRR-NUC domain-containing protein	VRR_NUC	Burkholderia thailandensis E264	Bacteria; Proteobacteria; Betaproteobacteria; Burkholderiales; Burkholderiaceae; Burkholderia; pseudomallei group
NC_007651.1	147259	148008	WP_011401675.1	BTH_RS12805	GCF_000012365.1	VRR-NUC domain-containing protein	VRR_NUC	Burkholderia thailandensis E264	Bacteria; Proteobacteria; Betaproteobacteria; Burkholderiales; Burkholderiaceae; Burkholderia; pseudomallei group
NC_007705.1	3820409	3821104	WP_011409250.1	TX61_RS17605	GCF_000010025.1	VRR-NUC domain-containing protein	VRR_NUC	Xanthomonas oryzae pv. oryzae MAFF 311018	Bacteria; Proteobacteria; Gammaproteobacteria; Xanthomonadales; Xanthomonadaceae; Xanthomonas
NC_009074.1	2130739	2132022	WP_011851713.1	BURPS668_RS09280	GCF_000015905.1	VRR-NUC domain-containing protein	VRR_NUC+TM+TM	Burkholderia pseudomallei 668	Bacteria; Proteobacteria; Betaproteobacteria; Burkholderiales; Burkholderiaceae; Burkholderia; pseudomallei group
NC_009778.1	268708	269970	WP_012123759.1	ESA_RS01340	GCF_000017665.1	VRR-NUC domain-containing protein	VRR_NUC	Cronobacter sakazakii ATCC BAA-894	Bacteria; Proteobacteria; Gammaproteobacteria; Enterobacterales; Enterobacteriaceae; Cronobacter
NC_009778.1	1186371	1187672	WP_012124363.1	ESA_RS05570	GCF_000017665.1	VRR-NUC domain-containing protein	VRR_NUC+TM+TM	Cronobacter sakazakii ATCC BAA-894	Bacteria; Proteobacteria; Gammaproteobacteria; Enterobacterales; Enterobacteriaceae; Cronobacter
NC_010002.1	778563	779318	WP_012202634.1	DACI_RS03580	GCF_000018665.1	hypothetical protein	VRR_NUC	Delftia acidovorans SPH-1	Bacteria; Proteobacteria; Betaproteobacteria; Burkholderiales; Comamonadaceae; Delftia
NC_010804.1	2820133	2820900	WP_012212778.1	BMULJ_RS13035	GCF_000010545.1	VRR-NUC domain-containing protein	VRR_NUC	Burkholderia multivorans ATCC 17616	Bacteria; Proteobacteria; Betaproteobacteria; Burkholderiales; Burkholderiaceae; Burkholderia; Burkholderia cepacia complex
NC_010508.1	234185	234955	WP_012327687.1	BCENMC03_RS01085	GCF_000019505.1	VRR-NUC domain-containing protein	VRR_NUC	Burkholderia cenocepacia MC0-3	Bacteria; Proteobacteria; Betaproteobacteria; Burkholderiales; Burkholderiaceae; Burkholderia; Burkholderia cepacia complex
NC_014733.1	817871	818758	WP_013441620.1	MPQ_RS04020	GCF_000183115.1	VRR-NUC domain-containing protein	VRR_NUC	Methylovorus sp. MP688	Bacteria; Proteobacteria; Betaproteobacteria; Nitrosomonadales; Methylophilaceae; Methylovorus; unclassified Methylovorus
NC_015061.1	2982056	2983318	WP_013576043.1	RAHAQ_RS13605	GCF_000187705.1	VRR-NUC domain-containing protein	VRR_NUC+TM+TM	Rahnella sp. Y9602	Bacteria; Proteobacteria; Gammaproteobacteria; Enterobacterales; Yersiniaceae; Rahnella; unclassified Rahnella
NC_015376.1	1760764	1762083	WP_013690181.1	BGLA_RS26500	GCF_000194745.1	VRR-NUC domain-containing protein	VRR_NUC+TM+TM+TM	Burkholderia gladioli BSR3	Bacteria; Proteobacteria; Betaproteobacteria; Burkholderiales; Burkholderiaceae; Burkholderia
NC_015381.1	3621651	3622355	WP_013699114.1	BGLA_RS15810	GCF_000194745.1	VRR-NUC domain-containing protein	VRR_NUC	Burkholderia gladioli BSR3	Bacteria; Proteobacteria; Betaproteobacteria; Burkholderiales; Burkholderiaceae; Burkholderia
NC_017075.1	2722148	2722387	WP_014428785.1	RGE_RS23725	GCF_000284255.1	VRR-NUC domain-containing protein	VRR_NUC	Rubrivivax gelatinosus IL144	Bacteria; Proteobacteria; Betaproteobacteria; Burkholderiales; Rubrivivax
NC_017267.2	1246443	1247138	WP_014502347.1	XOC_RS05550	GCF_000168315.3	VRR-NUC domain-containing protein	VRR_NUC	Xanthomonas oryzae pv. oryzicola BLS256	Bacteria; Proteobacteria; Gammaproteobacteria; Xanthomonadales; Xanthomonadaceae; Xanthomonas
NC_017845.1	3945610	3946959	WP_014701196.1	W5S_RS17835	GCF_000260925.1	VRR-NUC domain-containing protein	VRR_NUC+TM+TM	Pectobacterium parmentieri	Bacteria; Proteobacteria; Gammaproteobacteria; Enterobacterales; Pectobacteriaceae; Pectobacterium
NC_017933.1	621714	622976	WP_014728047.1	ES15_RS02965	GCF_000263215.1	VRR-NUC domain-containing protein	VRR_NUC	Cronobacter sakazakii ES15	Bacteria; Proteobacteria; Gammaproteobacteria; Enterobacterales; Enterobacteriaceae; Cronobacter
NC_017933.1	1555658	1556959	WP_014728563.1	ES15_RS07345	GCF_000263215.1	VRR-NUC domain-containing protein	VRR_NUC+TM+TM	Cronobacter sakazakii ES15	Bacteria; Proteobacteria; Gammaproteobacteria; Enterobacterales; Enterobacteriaceae; Cronobacter
NC_020260.1	272957	274219	WP_015386337.1	CSSP291_RS01385	GCF_000339015.1	VRR-NUC domain-containing protein	VRR_NUC	Cronobacter sakazakii SP291	Bacteria; Proteobacteria; Gammaproteobacteria; Enterobacterales; Enterobacteriaceae; Cronobacter
NC_020829.1	1402672	1403373	WP_015476037.1	H681_RS06445	GCF_000349845.1	VRR-NUC domain-containing protein	VRR_NUC	Pseudomonas sp. ATCC 13867	Bacteria; Proteobacteria; Gammaproteobacteria; Pseudomonadales; Pseudomonadaceae; Pseudomonas
NC_020912.1	4660466	4661167	WP_015503430.1	G655_RS21305	GCF_000359505.1	VRR-NUC domain-containing protein	VRR_NUC+TM	Pseudomonas aeruginosa B136-33	Bacteria; Proteobacteria; Gammaproteobacteria; Pseudomonadales; Pseudomonadaceae; Pseudomonas
NC_021173.1	2133392	2134129	WP_015601730.1	BTI_RS09775	GCF_000385525.1	VRR-NUC domain-containing protein	VRR_NUC	Burkholderia thailandensis MSMB121	Bacteria; Proteobacteria; Betaproteobacteria; Burkholderiales; Burkholderiaceae; Burkholderia; pseudomallei group
NZ_CBTQ010000114.1	186906	187607	WP_015647859.1	P38_RS22830	GCF_000689435.1	VRR-NUC domain-containing protein	VRR_NUC+TM	Pseudomonas aeruginosa MH38	Bacteria; Proteobacteria; Gammaproteobacteria; Pseudomonadales; Pseudomonadaceae; Pseudomonas
NC_013421.1	3887221	3888570	WP_015731102.1	PECWA_RS17390	GCF_000024645.1	VRR-NUC domain-containing protein	VRR_NUC+TM+TM	Pectobacterium parmentieri WPP163	Bacteria; Proteobacteria; Gammaproteobacteria; Enterobacterales; Pectobacteriaceae; Pectobacterium
NC_013421.1	3889844	3891193	WP_015731105.1	PECWA_RS17400	GCF_000024645.1	VRR-NUC domain-containing protein	VRR_NUC+TM+TM	Pectobacterium parmentieri WPP163	Bacteria; Proteobacteria; Gammaproteobacteria; Enterobacterales; Pectobacteriaceae; Pectobacterium
NC_012962.1	4145720	4147078	WP_015835656.1	PAU_RS17495	GCF_000196475.1	VRR-NUC domain-containing protein	VRR_NUC+TM+TM	Photorhabdus asymbiotica	Bacteria; Proteobacteria; Gammaproteobacteria; Enterobacterales; Morganellaceae; Photorhabdus
NC_016818.1	2987335	2988597	WP_015697755.1	RAHAQ2_RS13390	GCF_000241955.1	VRR-NUC domain-containing protein	VRR_NUC+TM+TM	Rahnella aquatilis CIP 78.65 = ATCC 33071	Bacteria; Proteobacteria; Gammaproteobacteria; Enterobacterales; Yersiniaceae; Rahnella
NC_017047.1	3012304	3013566	WP_015690115.1	Q7S_RS13525	GCF_000255535.1	VRR-NUC domain-containing protein	VRR_NUC+TM	Rahnella aquatilis HX2	Bacteria; Proteobacteria; Gammaproteobacteria; Enterobacterales; Yersiniaceae; Rahnella
NC_012724.2	2560587	2561636	WP_015876297.1	BGLU_RS11810	GCF_000022645.2	DUF4150 domain-containing protein	Tox-PAAR-like	Burkholderia glumae BGR1	Bacteria; Proteobacteria; Betaproteobacteria; Burkholderiales; Burkholderiaceae; Burkholderia
NC_012962.1	4265079	4266437	WP_015835744.1	PAU_RS18150	GCF_000196475.1	VRR-NUC domain-containing protein	VRR_NUC+TM+TM	Photorhabdus asymbiotica	Bacteria; Proteobacteria; Gammaproteobacteria; Enterobacterales; Morganellaceae; Photorhabdus
NZ_KB976991.1	654717	655715	WP_016143994.1	F929_RS09125	GCF_000399705.1	hypothetical protein	RE_Bpu10I	Acinetobacter lactucae	Bacteria; Proteobacteria; Gammaproteobacteria; Moraxellales; Moraxellaceae; Acinetobacter; Acinetobacter calcoaceticus/baumannii complex
NZ_AXZX01000236.1	60440	61144	WP_016038228.1	W5E_RS0118315	GCF_000689555.1	VRR-NUC domain-containing protein	VRR_NUC	Burkholderia cenocepacia PT15	Bacteria; Proteobacteria; Betaproteobacteria; Burkholderiales; Burkholderiaceae; Burkholderia; Burkholderia cepacia complex
NZ_CP004378.1	2889253	2889987	WP_015984972.1	BBU_RS38245	GCF_000764575.1	VRR-NUC domain-containing protein	VRR_NUC	Burkholderia pseudomallei NAU35A-3	Bacteria; Proteobacteria; Betaproteobacteria; Burkholderiales; Burkholderiaceae; Burkholderia; pseudomallei group
NZ_KE332395.1	200395	201207	WP_016418904.1	L861_RS22155	GCF_000409775.1	VRR-NUC domain-containing protein	VRR_NUC	Halomonas anticariensis FP35 = DSM 16096	Bacteria; Proteobacteria; Gammaproteobacteria; Oceanospirillales; Halomonadaceae; Halomonas
NZ_KE150359.1	2510	3265	WP_016453942.1	HMPREF9702_RS11900	GCF_000411215.1	hypothetical protein	VRR_NUC	Delftia acidovorans CCUG 15835	Bacteria; Proteobacteria; Betaproteobacteria; Burkholderiales; Comamonadaceae; Delftia
NZ_ATGG01000064.1	1294	2004	WP_016541448.1	F957_RS00280	GCF_000413855.1	VRR-NUC domain-containing protein	VRR_NUC+TM	Acinetobacter gyllenbergii CIP 110306 = MTCC 11365	Bacteria; Proteobacteria; Gammaproteobacteria; Pseudomonadales; Moraxellaceae; Acinetobacter
NZ_VYQH01000611.1	2310	3065	WP_016451222.1	F3K36_RS32395	GCF_008725625.1	hypothetical protein		Delftia sp. BR1	Bacteria; Proteobacteria; Betaproteobacteria; Burkholderiales; Comamonadaceae; Delftia
NZ_AJXG01000353.1	2323	3201	WP_016974653.1	PTOL117_RS0132155	GCF_000276565.1	VRR-NUC domain-containing protein	VRR_NUC	Pseudomonas tolaasii PMS117	Bacteria; Proteobacteria; Gammaproteobacteria; Pseudomonadales; Pseudomonadaceae; Pseudomonas
NZ_ALWI01000020.1	132876	133646	WP_017330566.1	B392_RS37885	GCF_000297475.1	VRR-NUC domain-containing protein	DUF4776+VRR_NUC	Burkholderia pyrrocinia CH-67	Bacteria; Proteobacteria; Betaproteobacteria; Burkholderiales; Burkholderiaceae; Burkholderia; Burkholderia cepacia complex
NZ_AMXG01000057.1	22181	23059	WP_017480220.1	D109_RS0130325	GCF_000313235.1	VRR-NUC domain-containing protein	VRR_NUC	Pseudomonas sp. PAMC 26793	Bacteria; Proteobacteria; Gammaproteobacteria; Pseudomonadales; Pseudomonadaceae; Pseudomonas
NZ_CP009435.1	1164729	1165457	WP_017432133.1	KS03_RS17835	GCF_000960995.1	VRR-NUC domain-containing protein	VRR_NUC	Burkholderia glumae LMG 2196 = ATCC 33617	Bacteria; Proteobacteria; Betaproteobacteria; Burkholderiales; Burkholderiaceae; Burkholderia
NZ_ANJE01000063.1	24255	24980	WP_017701990.1	NZ4_RS0117880	GCF_000344395.1	VRR-NUC domain-containing protein	VRR_NUC	Pseudomonas syringae pv. actinidiae ICMP 18804	Bacteria; Proteobacteria; Gammaproteobacteria; Pseudomonadales; Pseudomonadaceae; Pseudomonas; Pseudomonas syringae
NZ_KB467824.1	428145	429035	WP_017874812.1	JANGC3_RS0102025	GCF_000344615.1	VRR-NUC domain-containing protein	VRR_NUC	Janthinobacterium sp. CG3	Bacteria; Proteobacteria; Betaproteobacteria; Burkholderiales; Oxalobacteraceae; Janthinobacterium
NZ_KB467824.1	2362132	2363016	WP_017876394.1	JANGC3_RS0110205	GCF_000344615.1	VRR-NUC domain-containing protein	VRR_NUC	Janthinobacterium sp. CG3	Bacteria; Proteobacteria; Betaproteobacteria; Burkholderiales; Oxalobacteraceae; Janthinobacterium
NZ_AOUH01000025.1	94939	95820	WP_017847967.1	H736_RS0118905	GCF_000350565.1	hypothetical protein	VRR_NUC	Pseudomonas veronii 1YdBTEX2	Bacteria; Proteobacteria; Gammaproteobacteria; Pseudomonadales; Pseudomonadaceae; Pseudomonas
NZ_AECN01000030.1	35246	35956	WP_019254630.1	BTHE555_RS0103760	GCF_000179515.1	VRR-NUC domain-containing protein	VRR_NUC	Burkholderia thailandensis E555	Bacteria; Proteobacteria; Betaproteobacteria; Burkholderiales; Burkholderiaceae; Burkholderia; pseudomallei group
NZ_CP036251.1	542407	543102	WP_019302044.1	EYR27_RS02660	GCF_000212755.2	VRR-NUC domain-containing protein	VRR_NUC	Xanthomonas oryzae	Bacteria; Proteobacteria; Gammaproteobacteria; Xanthomonadales; Xanthomonadaceae; Xanthomonas
NZ_AFHL01000525.1	1356	2051	WP_019305350.1	USX8_RS0121110	GCF_000212775.1	VRR-NUC domain-containing protein	VRR_NUC	Xanthomonas oryzae X8-1A	Bacteria; Proteobacteria; Gammaproteobacteria; Xanthomonadales; Xanthomonadaceae; Xanthomonas
NZ_JH600545.1	48403	49128	WP_019332490.1	KW7_RS14625	GCF_000245395.1	VRR-NUC domain-containing protein	VRR_NUC	Pseudomonas syringae pv. theae NCPPB 2598	Bacteria; Proteobacteria; Gammaproteobacteria; Pseudomonadales; Pseudomonadaceae; Pseudomonas; Pseudomonas syringae
NZ_ALBV02000183.1	2400	3101	WP_019372086.1	A222_RS0221060	GCF_000287815.1	VRR-NUC domain-containing protein	VRR_NUC+TM	Pseudomonas aeruginosa N002	Bacteria; Proteobacteria; Gammaproteobacteria; Pseudomonadales; Pseudomonadaceae; Pseudomonas
NZ_ALOY01000139.1	680	1903	WP_019464795.1	B556_RS0106815	GCF_000292265.1	VRR-NUC domain-containing protein	VRR_NUC+TM+TM	Dyella japonica A8	Bacteria; Proteobacteria; Gammaproteobacteria; Xanthomonadales; Rhodanobacteraceae; Dyella
NZ_AFNF01000108.1	6960	7661	WP_019681384.1	AES1R_RS07415	GCF_000220025.3	VRR-NUC domain-containing protein	VRR_NUC+TM	Pseudomonas aeruginosa AES-1R	Bacteria; Proteobacteria; Gammaproteobacteria; Pseudomonadales; Pseudomonadaceae; Pseudomonas
NC_021658.1	3771255	3773933	WP_020734667.1	SCE1572_RS13835	GCF_000418325.1	type VI secretion system tip protein VgrG	Phage_GPD+Phage_base_V+VRR_NUC	Sorangium cellulosum So0157-2	Bacteria; Proteobacteria; Deltaproteobacteria; Myxococcales; Sorangiineae; Polyangiaceae; Sorangium
NC_021870.1	3140868	3141239	WP_020845228.1	A464_RS15175	GCF_000439255.1	hypothetical protein	VRR_NUC	Salmonella bongori N268-08	Bacteria; Proteobacteria; Gammaproteobacteria; Enterobacterales; Enterobacteriaceae; Salmonella
NC_022041.1	2019120	2020247	WP_020950704.1	JCM7686_RS09825	GCF_000444995.1	DUF4150 domain-containing protein	Tox-PAAR-like	Paracoccus aminophilus JCM 7686	Bacteria; Proteobacteria; Alphaproteobacteria; Rhodobacterales; Rhodobacteraceae; Paracoccus
NZ_ASSI01000063.1	6913	8175	WP_021159149.1	L810_RS15070	GCF_000466765.1	VRR-NUC domain-containing protein	VRR_NUC+TM+TM	Burkholderia sp. AU4i	Bacteria; Proteobacteria; Betaproteobacteria; Burkholderiales; Burkholderiaceae; Burkholderia
NZ_ATHX01000011.1	333	1610	WP_021242226.1	L799_RS133785	GCF_000467655.2	VRR-NUC domain-containing protein	VRR_NUC+TM+TM	Enterobacter roggenkampii EC_38VIM1	Bacteria; Proteobacteria; Gammaproteobacteria; Enterobacterales; Enterobacteriaceae; Enterobacter; Enterobacter cloacae complex
NZ_AXDT01000133.1	20567	21928	WP_021322958.1	O185_RS45375	GCF_000478765.1	VRR-NUC domain-containing protein	VRR_NUC+TM+TM	Photorhabdus temperata J3	Bacteria; Proteobacteria; Gammaproteobacteria; Enterobacterales; Morganellaceae; Photorhabdus
NZ_BATI01000055.1	1611	2909	WP_021703003.1	PA6_RS20970	GCF_000467105.1	VRR-NUC domain-containing protein	VRR_NUC+TM+TM+TM	Pseudomonas alcaligenes NBRC 14159	Bacteria; Proteobacteria; Gammaproteobacteria; Pseudomonadales; Pseudomonadaceae; Pseudomonas
NZ_AXCB01000047.1	140	1045	WP_023009696.1	Q674_RS36945	GCF_000475375.1	hypothetical protein	VRR_NUC	Marinobacter sp. EVN1	Bacteria; Proteobacteria; Gammaproteobacteria; Pseudomonadales; Marinobacteraceae; Marinobacter
NZ_AXDT01000505.1	1004	2359	WP_023046718.1	O185_RS55530	GCF_000478765.1	VRR-NUC domain-containing protein	VRR_NUC+TM+TM	Photorhabdus temperata J3	Bacteria; Proteobacteria; Gammaproteobacteria; Enterobacterales; Morganellaceae; Photorhabdus
NZ_AXDT01000537.1	1	1164	WP_023046734.1	O185_RS55655	GCF_000478765.1	VRR-NUC domain-containing protein	VRR_NUC	Photorhabdus temperata J3	Bacteria; Proteobacteria; Gammaproteobacteria; Enterobacterales; Morganellaceae; Photorhabdus
NZ_ASRD01000140.1	69543	70244	WP_023088887.1	KV58_RS0126970	GCF_000412555.1	VRR-NUC domain-containing protein	VRR_NUC+TM	Pseudomonas aeruginosa str. C 1426	Bacteria; Proteobacteria; Gammaproteobacteria; Pseudomonadales; Pseudomonadaceae; Pseudomonas
NZ_KI518703.1	4628755	4629456	WP_023084563.1	Q089_RS27385	GCF_000480435.1	VRR-NUC domain-containing protein	VRR_NUC+TM	Pseudomonas aeruginosa C48	Bacteria; Proteobacteria; Gammaproteobacteria; Pseudomonadales; Pseudomonadaceae; Pseudomonas
NZ_KI518724.1	1186271	1186972	WP_023088513.1	Q084_RS23680	GCF_000480535.1	VRR-NUC domain-containing protein	VRR_NUC+TM	Pseudomonas aeruginosa M9A.1	Bacteria; Proteobacteria; Gammaproteobacteria; Pseudomonadales; Pseudomonadaceae; Pseudomonas
NZ_KI518750.1	3014894	3015595	WP_023092169.1	Q079_RS20315	GCF_000480645.1	VRR-NUC domain-containing protein	VRR_NUC+TM	Pseudomonas aeruginosa BL25	Bacteria; Proteobacteria; Gammaproteobacteria; Pseudomonadales; Pseudomonadaceae; Pseudomonas
NZ_KI518934.1	1452012	1452713	WP_023107199.1	Q058_RS26485	GCF_000481065.1	VRR-NUC domain-containing protein	VRR_NUC+TM	Pseudomonas aeruginosa BL04	Bacteria; Proteobacteria; Gammaproteobacteria; Pseudomonadales; Pseudomonadaceae; Pseudomonas
NZ_AKZH01000152.1	29472	30173	WP_023110332.1	PAE2_RS21610	GCF_000297355.1	VRR-NUC domain-containing protein	VRR_NUC+TM	Pseudomonas aeruginosa E2	Bacteria; Proteobacteria; Gammaproteobacteria; Pseudomonadales; Pseudomonadaceae; Pseudomonas
NZ_KI519266.1	3996125	3996826	WP_023129104.1	Q005_RS24695	GCF_000481865.1	VRR-NUC domain-containing protein	VRR_NUC+TM	Pseudomonas aeruginosa X24509	Bacteria; Proteobacteria; Gammaproteobacteria; Pseudomonadales; Pseudomonadaceae; Pseudomonas
NZ_AOZJ01000050.1	152396	153922	WP_023234120.1	SEEC0818_RS37295	GCF_000487275.1	VRR-NUC domain-containing protein	VRR_NUC+TM+TM	Salmonella enterica subsp. enterica serovar Cerro str. 818	Bacteria; Proteobacteria; Gammaproteobacteria; Enterobacterales; Enterobacteriaceae; Salmonella
NZ_KI530699.1	678759	679772	WP_023269915.1	F987_RS17880	GCF_000488195.1	hypothetical protein	TM+TM	Acinetobacter gyllenbergii NIPH 230	Bacteria; Proteobacteria; Gammaproteobacteria; Moraxellales; Moraxellaceae; Acinetobacter
NZ_KI535695.1	3306384	3307661	WP_023344967.1	L362_RS07375	GCF_000493175.1	VRR-NUC domain-containing protein	VRR_NUC+TM+TM	Enterobacter sp. MGH 16	Bacteria; Proteobacteria; Gammaproteobacteria; Enterobacterales; Enterobacteriaceae; Enterobacter; Enterobacter cloacae complex; unclassified Enterobacter cloacae complex
NC_022808.2	4840512	4841213	WP_023518775.1	PA1S_RS22520	GCF_000496605.2	VRR-NUC domain-containing protein	VRR_NUC+TM	Pseudomonas aeruginosa PA1	Bacteria; Proteobacteria; Gammaproteobacteria; Pseudomonadales; Pseudomonadaceae; Pseudomonas
NZ_APZX01000141.1	5999	7288	WP_024207601.1	ECP03047993_RS01875	GCF_000357685.2	VRR-NUC domain-containing protein	VRR_NUC+TM+TM	Escherichia coli P0304799.3	Bacteria; Proteobacteria; Gammaproteobacteria; Enterobacterales; Enterobacteriaceae; Escherichia
NZ_ASFO01000072.1	7535	8533	WP_024432363.1	K618_RS0113870	GCF_000453025.1	hypothetical protein	RE_Bpu10I+VRR_NUC	Acinetobacter baumannii TG22150	Bacteria; Proteobacteria; Gammaproteobacteria; Moraxellales; Moraxellaceae; Acinetobacter; Acinetobacter calcoaceticus/baumannii complex
NZ_AVDY02000044.1	38704	39429	WP_024656349.1	N027_RS0203970	GCF_000452545.1	VRR-NUC domain-containing protein	VRR_NUC	Pseudomonas syringae USA007	Bacteria; Proteobacteria; Gammaproteobacteria; Pseudomonadales; Pseudomonadaceae; Pseudomonas; Pseudomonas syringae
NZ_AVEG02000317.1	1590	2876	WP_024678527.1	N019_RS0220245	GCF_000452685.1	VRR-NUC domain-containing protein	DUF3146+VRR_NUC+DUF3168+TM+TM	Pseudomonas syringae CC1559	Bacteria; Proteobacteria; Gammaproteobacteria; Pseudomonadales; Pseudomonadaceae; Pseudomonas; Pseudomonas syringae
NZ_AYSY01000172.1	8101	8796	WP_024711190.1	W815_RS0108375	GCF_000507025.1	VRR-NUC domain-containing protein	VRR_NUC	Xanthomonas oryzae pv. oryzicola MAI10	Bacteria; Proteobacteria; Gammaproteobacteria; Xanthomonadales; Xanthomonadaceae; Xanthomonas
NZ_JUAX01000008.1	173603	174304	WP_024928875.1	NQ00_RS05230	GCF_000796585.1	VRR-NUC domain-containing protein	VRR_NUC+TM	Pseudomonas aeruginosa	Bacteria; Proteobacteria; Gammaproteobacteria; Pseudomonadales; Pseudomonadaceae; Pseudomonas
NZ_AYTM02000002.1	3538632	3539357	WP_024959434.1	V476_RS16100	GCF_000507185.2	VRR-NUC domain-containing protein	VRR_NUC	Pseudomonas syringae KCTC 12500	Bacteria; Proteobacteria; Gammaproteobacteria; Pseudomonadales; Pseudomonadaceae; Pseudomonas; Pseudomonas syringae
NZ_JAQK01000048.1	8234	8932	WP_024947446.1	AK48_RS0116890	GCF_000590905.1	VRR-NUC domain-containing protein	VRR_NUC	Pseudomonas aeruginosa MW3a	Bacteria; Proteobacteria; Gammaproteobacteria; Pseudomonadales; Pseudomonadaceae; Pseudomonas
NZ_JAPY01000018.1	1501	2499	WP_025095068.1	EG58_RS0107040	GCF_000633005.1	hypothetical protein	RE_Bpu10I+VRR_NUC	Acinetobacter soli TCM341	Bacteria; Proteobacteria; Gammaproteobacteria; Pseudomonadales; Moraxellaceae; Acinetobacter
NZ_AYMP01000016.1	168380	169888	WP_025153203.1	U868_RS23575	GCF_000633515.1	VRR-NUC domain-containing protein	VRR_NUC+TM+TM	Morganella morganii H1r	Bacteria; Proteobacteria; Gammaproteobacteria; Enterobacterales; Morganellaceae; Morganella
NZ_CP007039.1	4520500	4521201	WP_025261380.1	BH81_RS19140	GCF_000517305.1	VRR-NUC domain-containing protein	VRR_NUC	Pseudomonas cichorii JBC1	Bacteria; Proteobacteria; Gammaproteobacteria; Pseudomonadales; Pseudomonadaceae; Pseudomonas
NZ_CP007445.1	1057516	1059093	WP_025315136.1	GAPWK_RS04810	GCF_000599985.1	hypothetical protein	VRR_NUC	Gilliamella apicola	Bacteria; Proteobacteria; Gammaproteobacteria; Orbales; Orbaceae; Gilliamella
NZ_CP004117.1	2055400	2056134	WP_025369568.1	BTJ_RS09140	GCF_000567945.1	VRR-NUC domain-containing protein	VRR_NUC	Burkholderia thailandensis E444	Bacteria; Proteobacteria; Betaproteobacteria; Burkholderiales; Burkholderiaceae; Burkholderia; pseudomallei group
NZ_CP007230.1	969228	970577	WP_025381541.1	BF17_RS04325	GCF_000582515.1	VRR-NUC domain-containing protein	VRR_NUC+TM+TM	Yersinia similis	Bacteria; Proteobacteria; Gammaproteobacteria; Enterobacterales; Yersiniaceae; Yersinia
NZ_ABBG01000020.1	4521	5282	WP_025404550.1	BOKL0001_RS01590	GCF_000170375.1	VRR-NUC domain-containing protein	VRR_NUC	Burkholderia oklahomensis C6786	Bacteria; Proteobacteria; Betaproteobacteria; Burkholderiales; Burkholderiaceae; Burkholderia; pseudomallei group
NZ_CP004090.1	893437	894174	WP_025405659.1	BTL_RS21055	GCF_000567905.1	VRR-NUC domain-containing protein	VRR_NUC	Burkholderia thailandensis H0587	Bacteria; Proteobacteria; Betaproteobacteria; Burkholderiales; Burkholderiaceae; Burkholderia; pseudomallei group
NZ_AECN01000001.1	66820	67554	WP_025987275.1	BTHE555_RS0100240	GCF_000179515.1	VRR-NUC domain-containing protein	VRR_NUC	Burkholderia thailandensis E555	Bacteria; Proteobacteria; Betaproteobacteria; Burkholderiales; Burkholderiaceae; Burkholderia; pseudomallei group
NZ_ALWI01000069.1	43521	44285	WP_026045091.1	B392_RS0126675	GCF_000297475.1	nuclease		Burkholderia pyrrocinia CH-67	Bacteria; Proteobacteria; Betaproteobacteria; Burkholderiales; Burkholderiaceae; Burkholderia; Burkholderia cepacia complex
NZ_CP008956.1	2898142	2898852	WP_026052302.1	C798_RS13045	GCF_000300435.2	VRR-NUC domain-containing protein	VRR_NUC	Herbaspirillum rubrisubalbicans Os34	Bacteria; Proteobacteria; Betaproteobacteria; Burkholderiales; Oxalobacteraceae; Herbaspirillum
NZ_JENG01000004.1	40370	41719	WP_025919303.1	AZ50_RS0109705	GCF_000632375.1	VRR-NUC domain-containing protein	VRR_NUC+TM+TM	Pectobacterium parmentieri CFIA1002	Bacteria; Proteobacteria; Gammaproteobacteria; Enterobacterales; Pectobacteriaceae; Pectobacterium
NZ_ANSK01000001.1	845910	846644	WP_026121034.1	G118_RS0103830	GCF_000341045.1	VRR-NUC domain-containing protein	VRR_NUC	Paraburkholderia kururiensis M130	Bacteria; Proteobacteria; Betaproteobacteria; Burkholderiales; Burkholderiaceae; Paraburkholderia
NZ_KI421536.1	2938192	2939454	WP_027791563.1	BURCEP_RS0131560	GCF_000473485.1	VRR-NUC domain-containing protein	VRR_NUC+TM+TM	Burkholderia cepacia ATCC 25416	Bacteria; Proteobacteria; Betaproteobacteria; Burkholderiales; Burkholderiaceae; Burkholderia; Burkholderia cepacia complex
NZ_AXZZ01000292.1	36914	37684	WP_027809303.1	W5I_RS0132325	GCF_000689595.1	VRR-NUC domain-containing protein	VRR_NUC	Burkholderia cenocepacia D2AES	Bacteria; Proteobacteria; Betaproteobacteria; Burkholderiales; Burkholderiaceae; Burkholderia; Burkholderia cepacia complex
NZ_KI912423.1	125965	126690	WP_027959034.1	N557_RS0121650	GCF_000518325.1	VRR-NUC domain-containing protein	VRR_NUC	Halomonas sp. 23_GOM-1509m	Bacteria; Proteobacteria; Gammaproteobacteria; Oceanospirillales; Halomonadaceae; Halomonas
NZ_AQGN01000189.1	8875	10158	WP_028131672.1	K527_RS0125360	GCF_000647495.1	VRR-NUC domain-containing protein	VRR_NUC+TM+TM	Escherichia coli STEC O174:H8 str. 02-07607	Bacteria; Proteobacteria; Gammaproteobacteria; Enterobacterales; Enterobacteriaceae; Escherichia
NZ_JGYF01000072.1	176805	177506	WP_028681072.1	CR65_RS0112570	GCF_000632755.1	VRR-NUC domain-containing protein	VRR_NUC	Pseudomonas aeruginosa	Bacteria; Proteobacteria; Gammaproteobacteria; Pseudomonadales; Pseudomonadaceae; Pseudomonas
NZ_ATWI01000016.1	2129	3034	WP_029655552.1	K325_RS0117475	GCF_000421165.1	hypothetical protein	VRR_NUC	Marinobacter daepoensis DSM 16072	Bacteria; Proteobacteria; Gammaproteobacteria; Pseudomonadales; Marinobacteraceae; Marinobacter
NZ_ATAH01000092.1	1569	2270	WP_030046795.1	M003_RS41795	GCF_000647635.1	VRR-NUC domain-containing protein	VRR_NUC+TM	Pseudomonas aeruginosa IGB83	Bacteria; Proteobacteria; Gammaproteobacteria; Pseudomonadales; Pseudomonadaceae; Pseudomonas
NZ_KI914466.1	2249436	2250137	WP_031630293.1	Q051_RS17630	GCF_000520275.1	VRR-NUC domain-containing protein	VRR_NUC+TM	Pseudomonas aeruginosa BWHPSA046	Bacteria; Proteobacteria; Gammaproteobacteria; Pseudomonadales; Pseudomonadaceae; Pseudomonas
NZ_KI914540.1	4584397	4585098	WP_031636541.1	Q043_RS27635	GCF_000520435.1	VRR-NUC domain-containing protein	VRR_NUC+TM	Pseudomonas aeruginosa BWHPSA038	Bacteria; Proteobacteria; Gammaproteobacteria; Pseudomonadales; Pseudomonadaceae; Pseudomonas
NZ_KI914508.1	247142	247843	WP_031639876.1	Q048_RS35105	GCF_000520335.1	VRR-NUC domain-containing protein	VRR_NUC+TM	Pseudomonas aeruginosa BWHPSA043	Bacteria; Proteobacteria; Gammaproteobacteria; Pseudomonadales; Pseudomonadaceae; Pseudomonas
NZ_KI914577.1	169334	170035	WP_031652782.1	Q042_RS28340	GCF_000520455.1	VRR-NUC domain-containing protein	VRR_NUC+TM	Pseudomonas aeruginosa BWHPSA037	Bacteria; Proteobacteria; Gammaproteobacteria; Pseudomonadales; Pseudomonadaceae; Pseudomonas
NZ_KK213160.1	3898286	3898987	WP_031756445.1	V562_RS24185	GCF_000629365.1	VRR-NUC domain-containing protein	VRR_NUC+TM	Pseudomonas aeruginosa PS75	Bacteria; Proteobacteria; Gammaproteobacteria; Pseudomonadales; Pseudomonadaceae; Pseudomonas
NZ_KK213219.1	3885908	3886609	WP_031684875.1	V556_RS24170	GCF_000629485.1	VRR-NUC domain-containing protein	VRR_NUC+TM	Pseudomonas aeruginosa BWH055	Bacteria; Proteobacteria; Gammaproteobacteria; Pseudomonadales; Pseudomonadaceae; Pseudomonas
NZ_KK213227.1	184732	185436	WP_031693824.1	V555_RS33395	GCF_000629505.1	VRR-NUC domain-containing protein	VRR_NUC+TM	Pseudomonas aeruginosa BWH054	Bacteria; Proteobacteria; Gammaproteobacteria; Pseudomonadales; Pseudomonadaceae; Pseudomonas
NZ_JEWY01000028.1	1702	2700	WP_032010366.1	J542_RS19180	GCF_000580975.1	hypothetical protein	RE_Bpu10I+VRR_NUC	Acinetobacter baumannii 299505	Bacteria; Proteobacteria; Gammaproteobacteria; Moraxellales; Moraxellaceae; Acinetobacter; Acinetobacter calcoaceticus/baumannii complex
NZ_JEYP01000018.1	49278	50276	WP_032030999.1	J602_RS17150	GCF_000582355.1	hypothetical protein	RE_Bpu10I+VRR_NUC	Acinetobacter baumannii 1417041	Bacteria; Proteobacteria; Gammaproteobacteria; Moraxellales; Moraxellaceae; Acinetobacter; Acinetobacter calcoaceticus/baumannii complex
NZ_JFXB01000007.1	79857	80855	WP_031994389.1	J669_RS19440	GCF_000588135.1	hypothetical protein	RE_Bpu10I+VRR_NUC	Acinetobacter baumannii 1295549	Bacteria; Proteobacteria; Gammaproteobacteria; Moraxellales; Moraxellaceae; Acinetobacter; Acinetobacter calcoaceticus/baumannii complex
NZ_JHOC01000104.1	18478	19767	WP_032211366.1	BW70_RS00160	GCF_000617085.1	VRR-NUC domain-containing protein	VRR_NUC+TM+TM	Escherichia coli O174:H8 str. 04-3038	Bacteria; Proteobacteria; Gammaproteobacteria; Enterobacterales; Enterobacteriaceae; Escherichia
NZ_JNNF01000095.1	20718	22001	WP_032175876.1	AB84_RS00805	GCF_000700605.1	VRR-NUC domain-containing protein	VRR_NUC+TM+TM	Escherichia coli 2-052-05_S3_C1	Bacteria; Proteobacteria; Gammaproteobacteria; Enterobacterales; Enterobacteriaceae; Escherichia
NZ_JNOZ01000092.1	20653	21936	WP_032178261.1	AC42_RS00415	GCF_000703605.1	VRR-NUC domain-containing protein	VRR_NUC+TM+TM	Escherichia coli 2-052-05_S3_C3	Bacteria; Proteobacteria; Gammaproteobacteria; Enterobacterales; Enterobacteriaceae; Escherichia
NZ_AZUB01000003.1	585008	586291	WP_032651283.1	P349_RS12150	GCF_000568095.1	VRR-NUC domain-containing protein	VRR_NUC+TM+TM	Enterobacter sp. DC4	Bacteria; Proteobacteria; Gammaproteobacteria; Enterobacterales; Enterobacteriaceae; Enterobacter
NZ_RWKD01000031.1	15933	16811	WP_138763611.1	FHL13_RS29360	GCF_005930595.1	VRR-NUC domain-containing protein	VRR_NUC	Pseudomonas lactis	Bacteria; Proteobacteria; Gammaproteobacteria; Pseudomonadales; Pseudomonadaceae; Pseudomonas
NZ_RWKD01000031.1	18381	19259	WP_032892197.1	FHL13_RS29370	GCF_005930595.1	VRR-NUC domain protein	VRR_NUC	Pseudomonas lactis	Bacteria; Proteobacteria; Gammaproteobacteria; Pseudomonadales; Pseudomonadaceae; Pseudomonas
NZ_JNBN01000015.1	370631	371893	WP_032987955.1	ER21_RS17025	GCF_000698225.1	VRR-NUC domain-containing protein	VRR_NUC	Cronobacter sakazakii	Bacteria; Proteobacteria; Gammaproteobacteria; Enterobacterales; Enterobacteriaceae; Cronobacter
NZ_JNBN01000021.1	237487	238788	WP_032988345.1	ER21_RS14485	GCF_000698225.1	VRR-NUC domain-containing protein	VRR_NUC+TM+TM	Cronobacter sakazakii	Bacteria; Proteobacteria; Gammaproteobacteria; Enterobacterales; Enterobacteriaceae; Cronobacter
NZ_JPZD01000182.1	10563	11825	WP_032973783.1	JO78_RS0116985	GCF_000742335.1	VRR-NUC domain-containing protein	VRR_NUC	Cronobacter malonaticus	Bacteria; Proteobacteria; Gammaproteobacteria; Enterobacterales; Enterobacteriaceae; Cronobacter
NZ_JPZE01000034.1	240545	241813	WP_032994955.1	JO79_RS0118595	GCF_000742345.1	VRR-NUC domain-containing protein	VRR_NUC	Cronobacter malonaticus	Bacteria; Proteobacteria; Gammaproteobacteria; Enterobacterales; Enterobacteriaceae; Cronobacter
NZ_KN151106.1	3248858	3250207	WP_033071917.1	DH18_RS0115770	GCF_000757625.1	VRR-NUC domain-containing protein	VRR_NUC+TM+TM	Pectobacterium parmentieri	Bacteria; Proteobacteria; Gammaproteobacteria; Enterobacterales; Pectobacteriaceae; Pectobacterium
NZ_CBLI010000122.1	1	1017	WP_033848081.1	QZ15_RS02930	GCF_000493415.1	VRR-NUC domain-containing protein	VRR_NUC	Yersinia wautersii	Bacteria; Proteobacteria; Gammaproteobacteria; Enterobacterales; Yersiniaceae; Yersinia
NZ_JFDW01000018.1	12294	13292	WP_033846136.1	J627_RS14025	GCF_000584615.1	hypothetical protein	RE_Bpu10I+VRR_NUC	Acinetobacter sp. 1245593	Bacteria; Proteobacteria; Gammaproteobacteria; Moraxellales; Moraxellaceae; Acinetobacter; Acinetobacter calcoaceticus/baumannii complex
NZ_JTPW01000029.1	183832	184533	WP_033954262.1	NS87_RS12325	GCF_000792025.1	VRR-NUC domain-containing protein	VRR_NUC+TM	Pseudomonas aeruginosa	Bacteria; Proteobacteria; Gammaproteobacteria; Pseudomonadales; Pseudomonadaceae; Pseudomonas
NZ_JTQK01000028.1	23113	23820	WP_033970092.1	NS73_RS17880	GCF_000791705.1	VRR-NUC domain-containing protein	VRR_NUC	Pseudomonas aeruginosa	Bacteria; Proteobacteria; Gammaproteobacteria; Pseudomonadales; Pseudomonadaceae; Pseudomonas
NZ_JTQK01000091.1	1185	2030	WP_033974262.1	NS73_RS30765	GCF_000791705.1	VRR-NUC domain-containing protein	VRR_NUC	Pseudomonas aeruginosa	Bacteria; Proteobacteria; Gammaproteobacteria; Pseudomonadales; Pseudomonadaceae; Pseudomonas
NZ_JTOV01000018.1	147636	148337	WP_033974360.1	NT14_RS15660	GCF_000792635.1	VRR-NUC domain-containing protein	VRR_NUC+TM	Pseudomonas aeruginosa	Bacteria; Proteobacteria; Gammaproteobacteria; Pseudomonadales; Pseudomonadaceae; Pseudomonas
NZ_CP007224.1	4771679	4772380	WP_033984177.1	PA96_RS21940	GCF_000626655.2	VRR-NUC domain-containing protein	VRR_NUC+TM	Pseudomonas aeruginosa PA96	Bacteria; Proteobacteria; Gammaproteobacteria; Pseudomonadales; Pseudomonadaceae; Pseudomonas
NZ_JTUE01000033.1	241	939	WP_033990159.1	NR74_RS16090	GCF_000790025.1	VRR-NUC domain-containing protein	VRR_NUC	Pseudomonas aeruginosa	Bacteria; Proteobacteria; Gammaproteobacteria; Pseudomonadales; Pseudomonadaceae; Pseudomonas
NZ_JTTR01000170.1	7524	8231	WP_033988855.1	NR87_RS32790	GCF_000790325.1	VRR-NUC domain-containing protein	VRR_NUC	Pseudomonas aeruginosa	Bacteria; Proteobacteria; Gammaproteobacteria; Pseudomonadales; Pseudomonadaceae; Pseudomonas
NZ_JTMK01000005.1	103776	104477	WP_033986283.1	NT78_RS06305	GCF_000793285.1	VRR-NUC domain-containing protein	VRR_NUC+TM	Pseudomonas aeruginosa	Bacteria; Proteobacteria; Gammaproteobacteria; Pseudomonadales; Pseudomonadaceae; Pseudomonas
NZ_JUAW01000005.1	228	929	WP_034008940.1	NQ01_RS03220	GCF_000796525.1	VRR-NUC domain-containing protein	VRR_NUC+TM	Pseudomonas aeruginosa	Bacteria; Proteobacteria; Gammaproteobacteria; Pseudomonadales; Pseudomonadaceae; Pseudomonas
NZ_JTRX01000003.1	1277	1978	WP_034014336.1	NS34_RS00935	GCF_000789545.1	VRR-NUC domain-containing protein	VRR_NUC+TM	Pseudomonas aeruginosa	Bacteria; Proteobacteria; Gammaproteobacteria; Pseudomonadales; Pseudomonadaceae; Pseudomonas
NZ_JTTD01000032.1	265530	266231	WP_034019488.1	NS01_RS14320	GCF_000790685.1	VRR-NUC domain-containing protein	VRR_NUC+TM	Pseudomonas aeruginosa	Bacteria; Proteobacteria; Gammaproteobacteria; Pseudomonadales; Pseudomonadaceae; Pseudomonas
NZ_JTMQ01000008.1	598914	599615	WP_034022358.1	NT72_RS09120	GCF_000793165.1	VRR-NUC domain-containing protein	VRR_NUC+TM	Pseudomonas aeruginosa	Bacteria; Proteobacteria; Gammaproteobacteria; Pseudomonadales; Pseudomonadaceae; Pseudomonas
NZ_JTTF01000007.1	448525	449226	WP_034027688.1	NR99_RS04840	GCF_000790645.1	VRR-NUC domain-containing protein	VRR_NUC+TM	Pseudomonas aeruginosa	Bacteria; Proteobacteria; Gammaproteobacteria; Pseudomonadales; Pseudomonadaceae; Pseudomonas
NZ_JTUY01000014.1	212875	213576	WP_034047784.1	NR54_RS13610	GCF_000794305.1	VRR-NUC domain-containing protein	VRR_NUC+TM	Pseudomonas aeruginosa	Bacteria; Proteobacteria; Gammaproteobacteria; Pseudomonadales; Pseudomonadaceae; Pseudomonas
NZ_JTNE01000057.1	14346	15053	WP_034082556.1	NT58_RS28545	GCF_000790465.1	VRR-NUC domain-containing protein	VRR_NUC	Pseudomonas aeruginosa	Bacteria; Proteobacteria; Gammaproteobacteria; Pseudomonadales; Pseudomonadaceae; Pseudomonas
NZ_JPRU01000002.1	306841	308130	WP_034457670.1	IX31_RS09835	GCF_000737905.1	VRR-NUC domain-containing protein	VRR_NUC+TM+TM	Buttiauxella noackiae	Bacteria; Proteobacteria; Gammaproteobacteria; Enterobacterales; Enterobacteriaceae; Buttiauxella
NZ_KN046795.1	47802	48557	WP_034389558.1	DR66_RS00225	GCF_000741825.1	hypothetical protein		Delftia acidovorans	Bacteria; Proteobacteria; Betaproteobacteria; Burkholderiales; Comamonadaceae; Delftia
NZ_KN046795.1	5045520	5046275	WP_034396523.1	DR66_RS22125	GCF_000741825.1	hypothetical protein		Delftia acidovorans	Bacteria; Proteobacteria; Betaproteobacteria; Burkholderiales; Comamonadaceae; Delftia
NZ_JFHN01000065.1	79202	80392	WP_034940210.1	BG55_RS17470	GCF_000590885.1	VRR-NUC domain-containing protein	VRR_NUC+TM+TM	Erwinia mallotivora	Bacteria; Proteobacteria; Gammaproteobacteria; Enterobacterales; Erwiniaceae; Erwinia
NZ_CCCS020000038.1	8710	9087	WP_035193719.1	AFERRI_RS11930	GCF_000750615.1	VRR-NUC domain-containing protein	VRR_NUC	Acidithiobacillus ferrivorans	Bacteria; Proteobacteria; Acidithiobacillia; Acidithiobacillales; Acidithiobacillaceae; Acidithiobacillus
NZ_JQNA01000001.1	184316	185575	WP_035545949.1	FA94_RS00800	GCF_000745015.1	VRR-NUC domain-containing protein	VRR_NUC+TM+TM	Burkholderia sp. 9120	Bacteria; Proteobacteria; Betaproteobacteria; Burkholderiales; Burkholderiaceae; Burkholderia
NZ_JQNA01000002.1	3767020	3768270	WP_035556273.1	FA94_RS25080	GCF_000745015.1	VRR-NUC domain-containing protein	VRR_NUC+TM+TM	Burkholderia sp. 9120	Bacteria; Proteobacteria; Betaproteobacteria; Burkholderiales; Burkholderiaceae; Burkholderia
NZ_JQNA01000002.1	4291342	4292076	WP_035557133.1	FA94_RS27335	GCF_000745015.1	VRR-NUC domain-containing protein	VRR_NUC	Burkholderia sp. 9120	Bacteria; Proteobacteria; Betaproteobacteria; Burkholderiales; Burkholderiaceae; Burkholderia
NZ_KN150910.1	3017641	3018372	WP_035952803.1	DM81_RS14020	GCF_000756965.1	VRR-NUC domain-containing protein	VRR_NUC	Burkholderia multivorans	Bacteria; Proteobacteria; Betaproteobacteria; Burkholderiales; Burkholderiaceae; Burkholderia; Burkholderia cepacia complex
NZ_CH899772.1	51782	52531	WP_035979096.1	BURPSS13_RS22320	GCF_000152365.1	VRR-NUC domain-containing protein	VRR_NUC	Burkholderia pseudomallei S13	Bacteria; Proteobacteria; Betaproteobacteria; Burkholderiales; Burkholderiaceae; Burkholderia; pseudomallei group
NZ_BBJG01000005.1	140909	142171	WP_036056451.1	BGL01S_RS02290	GCF_000739755.1	VRR-NUC domain-containing protein	VRR_NUC+TM+TM	Burkholderia gladioli NBRC 13700	Bacteria; Proteobacteria; Betaproteobacteria; Burkholderiales; Burkholderiaceae; Burkholderia
NZ_CBWE010000026.1	225055	226500	WP_036424077.1	BN911_RS07865	GCF_000530115.1	VRR-NUC domain-containing protein	VRR_NUC+TM+TM	Morganella morganii IS15	Bacteria; Proteobacteria; Gammaproteobacteria; Enterobacterales; Morganellaceae; Morganella
NZ_JONO01000053.1	1	1337	WP_036772596.1	BO26_RS14645	GCF_000711895.1	VRR-NUC domain-containing protein	VRR_NUC+TM+TM	Photorhabdus australis DSM 17609	Bacteria; Proteobacteria; Gammaproteobacteria; Enterobacterales; Morganellaceae; Photorhabdus
NZ_KL543986.1	59043	60407	WP_036774507.1	BO26_RS19810	GCF_000711895.1	VRR-NUC domain-containing protein	VRR_NUC+TM+TM	Photorhabdus australis DSM 17609	Bacteria; Proteobacteria; Gammaproteobacteria; Enterobacterales; Morganellaceae; Photorhabdus
NZ_JRKN01000017.1	6462	6887	WP_036741742.1	IT41_RS12240	GCF_000763905.1	hypothetical protein		Paracoccus halophilus	Bacteria; Proteobacteria; Alphaproteobacteria; Rhodobacterales; Rhodobacteraceae; Paracoccus
NZ_AYSJ01000004.1	362117	363481	WP_036844057.1	PTE_RS06040	GCF_000517265.1	VRR-NUC domain-containing protein	VRR_NUC+TM+TM	Photorhabdus khanii NC19	Bacteria; Proteobacteria; Gammaproteobacteria; Enterobacterales; Morganellaceae; Photorhabdus
NZ_AYSJ01000004.1	478093	479451	WP_036844143.1	PTE_RS06600	GCF_000517265.1	VRR-NUC domain-containing protein	VRR_NUC+TM+TM	Photorhabdus khanii NC19	Bacteria; Proteobacteria; Gammaproteobacteria; Enterobacterales; Morganellaceae; Photorhabdus
NZ_AYSJ01000017.1	110678	112033	WP_036850557.1	PTE_RS21550	GCF_000517265.1	VRR-NUC domain-containing protein	VRR_NUC+TM+TM	Photorhabdus khanii NC19	Bacteria; Proteobacteria; Gammaproteobacteria; Enterobacterales; Morganellaceae; Photorhabdus
NZ_JGVH01000001.1	139008	140363	WP_036836782.1	MEG1_RS00560	GCF_000722995.1	VRR-NUC domain-containing protein	VRR_NUC+TM+TM	Photorhabdus temperata subsp. temperata Meg1	Bacteria; Proteobacteria; Gammaproteobacteria; Enterobacterales; Morganellaceae; Photorhabdus
NZ_JGVH01000054.1	2783	4077	WP_036840363.1	MEG1_RS15325	GCF_000722995.1	VRR-NUC domain-containing protein	VRR_NUC+TM+TM	Photorhabdus temperata subsp. temperata Meg1	Bacteria; Proteobacteria; Gammaproteobacteria; Enterobacterales; Morganellaceae; Photorhabdus
NZ_JGVH01000110.1	6862	8220	WP_036841620.1	MEG1_RS21105	GCF_000722995.1	VRR-NUC domain-containing protein	VRR_NUC+TM+TM	Photorhabdus temperata subsp. temperata Meg1	Bacteria; Proteobacteria; Gammaproteobacteria; Enterobacterales; Morganellaceae; Photorhabdus
NZ_JQOC01000003.1	260278	261633	WP_036808286.1	KS18_RS06885	GCF_000767775.1	VRR-NUC domain-containing protein	VRR_NUC+TM+TM	Photorhabdus luminescens	Bacteria; Proteobacteria; Gammaproteobacteria; Enterobacterales; Morganellaceae; Photorhabdus
NZ_JQOC01000017.1	103059	104411	WP_036813598.1	KS18_RS19235	GCF_000767775.1	VRR-NUC domain-containing protein	VRR_NUC+TM+TM	Photorhabdus luminescens	Bacteria; Proteobacteria; Gammaproteobacteria; Enterobacterales; Morganellaceae; Photorhabdus
NZ_JQOC01000027.1	9184	10542	WP_036814720.1	KS18_RS22245	GCF_000767775.1	VRR-NUC domain-containing protein	VRR_NUC+TM+TM	Photorhabdus luminescens	Bacteria; Proteobacteria; Gammaproteobacteria; Enterobacterales; Morganellaceae; Photorhabdus
NZ_CBXF010000002.1	6508	8073	WP_038234156.1	XSR1_RS01675	GCF_000531455.1	VRR-NUC domain-containing protein	VRR_NUC+TM+TM	Xenorhabdus szentirmaii DSM 16338	Bacteria; Proteobacteria; Gammaproteobacteria; Enterobacterales; Morganellaceae; Xenorhabdus
NZ_JSFK01000012.1	109278	109976	WP_038363300.1	NZ35_RS14525	GCF_000783395.1	VRR-NUC domain-containing protein	VRR_NUC+TM	Pseudomonas chlororaphis	Bacteria; Proteobacteria; Gammaproteobacteria; Pseudomonadales; Pseudomonadaceae; Pseudomonas
NZ_JSFK01000036.1	1062	2339	WP_038368493.1	NZ35_RS25270	GCF_000783395.1	VRR-NUC domain-containing protein	VRR_NUC+TM+TM	Pseudomonas chlororaphis	Bacteria; Proteobacteria; Gammaproteobacteria; Pseudomonadales; Pseudomonadaceae; Pseudomonas
NZ_JSFK01000051.1	1061	2347	WP_038369325.1	NZ35_RS27810	GCF_000783395.1	VRR-NUC domain-containing protein	VRR_NUC+TM+TM	Pseudomonas chlororaphis	Bacteria; Proteobacteria; Gammaproteobacteria; Pseudomonadales; Pseudomonadaceae; Pseudomonas
NZ_CP006693.1	53591	54880	WP_038394636.1	N898_RS00235	GCF_000756465.1	VRR-NUC domain-containing protein	VRR_NUC+TM+TM	Salmonella enterica subsp. arizonae serovar 62:z36:- str. RKS2983	Bacteria; Proteobacteria; Gammaproteobacteria; Enterobacterales; Enterobacteriaceae; Salmonella
NZ_CP008896.1	1866119	1866988	WP_038442236.1	HZ99_RS08035	GCF_000730425.1	VRR-NUC domain-containing protein	SP+VRR_NUC	Pseudomonas fluorescens	Bacteria; Proteobacteria; Gammaproteobacteria; Pseudomonadales; Pseudomonadaceae; Pseudomonas
NZ_CP008696.1	2795601	2796302	WP_038631977.1	EY04_RS12440	GCF_000698865.1	VRR-NUC domain-containing protein	VRR_NUC+TM	Pseudomonas chlororaphis	Bacteria; Proteobacteria; Gammaproteobacteria; Pseudomonadales; Pseudomonadaceae; Pseudomonas
NZ_CP009290.1	3482259	3483551	WP_038579162.1	JM49_RS15550	GCF_000761195.1	VRR-NUC domain-containing protein	VRR_NUC+TM+TM	Pseudomonas chlororaphis subsp. aurantiaca	Bacteria; Proteobacteria; Gammaproteobacteria; Pseudomonadales; Pseudomonadaceae; Pseudomonas
NZ_CH899729.1	318948	319679	WP_038716735.1	BURPS406E_RS07425	GCF_000152685.2	VRR-NUC domain-containing protein	VRR_NUC	Burkholderia pseudomallei 406e	Bacteria; Proteobacteria; Betaproteobacteria; Burkholderiales; Burkholderiaceae; Burkholderia; pseudomallei group
NZ_ABBR01000984.1	12512	13777	WP_038719100.1	BPSE0001_RS37270	GCF_000170595.1	VRR-NUC domain-containing protein	VRR_NUC+TM+TM	Burkholderia pseudomallei BCC215	Bacteria; Proteobacteria; Betaproteobacteria; Burkholderiales; Burkholderiaceae; Burkholderia; pseudomallei group
NZ_AHJB01000332.1	44199	44948	WP_038716148.1	BP1258A_RS27450	GCF_000259755.1	VRR-NUC domain-containing protein	VRR_NUC	Burkholderia pseudomallei 1258a	Bacteria; Proteobacteria; Betaproteobacteria; Burkholderiales; Burkholderiaceae; Burkholderia; pseudomallei group
NZ_APLI01000013.1	13186	13920	WP_038716748.1	H367_RS30695	GCF_000401035.1	VRR-NUC domain-containing protein	VRR_NUC	Burkholderia pseudomallei VEL	Bacteria; Proteobacteria; Betaproteobacteria; Burkholderiales; Burkholderiaceae; Burkholderia; pseudomallei group
NZ_CSLI01000002.1	96340	97101	WP_038714367.1	AKY68_RS04015	GCF_001212065.1	VRR-NUC domain-containing protein	VRR_NUC	Burkholderia pseudomallei	Bacteria; Proteobacteria; Betaproteobacteria; Burkholderiales; Burkholderiaceae; Burkholderia; pseudomallei group
NC_007434.1	3979535	3980293	WP_038724003.1	BURPS1710B_RS17810	GCF_000012785.1	VRR-NUC domain-containing protein	VRR_NUC	Burkholderia pseudomallei 1710b	Bacteria; Proteobacteria; Betaproteobacteria; Burkholderiales; Burkholderiaceae; Burkholderia; pseudomallei group
NZ_KN323054.1	5469045	5469764	WP_038729257.1	Y042_RS23610	GCF_000774765.1	VRR-NUC domain-containing protein	DUF4776+VRR_NUC	Burkholderia pseudomallei MSHR1357	Bacteria; Proteobacteria; Betaproteobacteria; Burkholderiales; Burkholderiaceae; Burkholderia; pseudomallei group
NC_009076.1	3573392	3574165	WP_038743760.1	BURPS1106A_RS38140	GCF_000015925.1	nuclease	VRR_NUC	Burkholderia pseudomallei 1106a	Bacteria; Proteobacteria; Betaproteobacteria; Burkholderiales; Burkholderiaceae; Burkholderia; pseudomallei group
NZ_CP009151.1	457139	457900	WP_038748018.1	X995_RS15345	GCF_000770455.1	VRR-NUC domain-containing protein	VRR_NUC	Burkholderia pseudomallei B03	Bacteria; Proteobacteria; Betaproteobacteria; Burkholderiales; Burkholderiaceae; Burkholderia; pseudomallei group
NZ_KN323000.1	1090779	1091540	WP_038745117.1	X885_RS04815	GCF_000774245.1	VRR-NUC domain-containing protein	VRR_NUC	Burkholderia pseudomallei MSHR4372	Bacteria; Proteobacteria; Betaproteobacteria; Burkholderiales; Burkholderiaceae; Burkholderia; pseudomallei group
NZ_KN323063.1	120369	121127	WP_038749768.1	Y602_RS00520	GCF_000774785.1	VRR-NUC domain-containing protein	VRR_NUC	Burkholderia pseudomallei MSHR733	Bacteria; Proteobacteria; Betaproteobacteria; Burkholderiales; Burkholderiaceae; Burkholderia; pseudomallei group
NZ_CM001156.1	3614779	3615552	WP_038755077.1	BP22_RS16105	GCF_000195145.1	nuclease	VRR_NUC	Burkholderia pseudomallei Bp22	Bacteria; Proteobacteria; Betaproteobacteria; Burkholderiales; Burkholderiaceae; Burkholderia; pseudomallei group
NZ_JPWT01000084.1	28025	28780	WP_038750966.1	X946_RS19595	GCF_000773065.1	VRR-NUC domain-containing protein	VRR_NUC	Burkholderia sp. ABCPW 111	Bacteria; Proteobacteria; Betaproteobacteria; Burkholderiales; Burkholderiaceae; Burkholderia
NZ_CH899773.1	1235387	1236118	WP_038758651.1	BURPSS13_RS27795	GCF_000152365.1	VRR-NUC domain-containing protein	VRR_NUC	Burkholderia pseudomallei S13	Bacteria; Proteobacteria; Betaproteobacteria; Burkholderiales; Burkholderiaceae; Burkholderia; pseudomallei group
NZ_CP004377.1	2143061	2143822	WP_038764458.1	BBU_RS09300	GCF_000764575.1	VRR-NUC domain-containing protein	VRR_NUC	Burkholderia pseudomallei NAU35A-3	Bacteria; Proteobacteria; Betaproteobacteria; Burkholderiales; Burkholderiaceae; Burkholderia; pseudomallei group
NZ_JQDO01000059.1	84409	85170	WP_038780330.1	X992_RS12755	GCF_000773255.1	VRR-NUC domain-containing protein	VRR_NUC	Burkholderia pseudomallei MSHR5492	Bacteria; Proteobacteria; Betaproteobacteria; Burkholderiales; Burkholderiaceae; Burkholderia; pseudomallei group
NZ_KN323005.1	127822	129081	WP_038787210.1	X895_RS18720	GCF_000774325.1	VRR-NUC domain-containing protein	VRR_NUC+TM+TM	Burkholderia pseudomallei MSHR4503	Bacteria; Proteobacteria; Betaproteobacteria; Burkholderiales; Burkholderiaceae; Burkholderia; pseudomallei group
NZ_JPWR01000105.1	10700	11458	WP_038794080.1	X977_RS23125	GCF_000773075.1	VRR-NUC domain-containing protein	VRR_NUC	Burkholderia pseudomallei MSHR7504	Bacteria; Proteobacteria; Betaproteobacteria; Burkholderiales; Burkholderiaceae; Burkholderia; pseudomallei group
NZ_KN323000.1	1320664	1321413	WP_038788768.1	X885_RS05890	GCF_000774245.1	VRR-NUC domain-containing protein	VRR_NUC	Burkholderia pseudomallei MSHR4372	Bacteria; Proteobacteria; Betaproteobacteria; Burkholderiales; Burkholderiaceae; Burkholderia; pseudomallei group
NZ_ABBF01000006.1	9928	10647	WP_038800112.1	BOKL0002_RS00285	GCF_000170355.1	VRR-NUC domain-containing protein	DUF4776+VRR_NUC	Burkholderia oklahomensis EO147	Bacteria; Proteobacteria; Betaproteobacteria; Burkholderiales; Burkholderiaceae; Burkholderia; pseudomallei group
NZ_ABBF01000448.1	10352	11089	WP_038801134.1	BOKL0002_RS16880	GCF_000170355.1	VRR-NUC domain-containing protein	VRR_NUC	Burkholderia oklahomensis EO147	Bacteria; Proteobacteria; Betaproteobacteria; Burkholderiales; Burkholderiaceae; Burkholderia; pseudomallei group
NZ_CAQT01000051.1	7502	8851	WP_038824270.1	QZ22_RS05820	GCF_000343955.1	VRR-NUC domain-containing protein	VRR_NUC+TM+TM	Yersinia pseudotuberculosis B-6796	Bacteria; Proteobacteria; Gammaproteobacteria; Enterobacterales; Yersiniaceae; Yersinia
NZ_AJKT01000038.1	7150	8412	WP_038877516.1	UOI_RS0118570	GCF_000409265.1	VRR-NUC domain-containing protein	VRR_NUC	Cronobacter sakazakii 2151	Bacteria; Proteobacteria; Gammaproteobacteria; Enterobacterales; Enterobacteriaceae; Cronobacter
NZ_AJKW01000008.1	211228	212529	WP_038856809.1	UOU_RS0105105	GCF_000409325.1	VRR-NUC domain-containing protein	VRR_NUC+TM+TM	Cronobacter universalis NCTC 9529	Bacteria; Proteobacteria; Gammaproteobacteria; Enterobacterales; Enterobacteriaceae; Cronobacter
NZ_AJKY01000086.1	72771	74072	WP_038887240.1	UOS_RS0109735	GCF_000409365.1	VRR-NUC domain-containing protein	VRR_NUC+TM+TM	Cronobacter dublinensis subsp. lausannensis LMG 23824	Bacteria; Proteobacteria; Gammaproteobacteria; Enterobacterales; Enterobacteriaceae; Cronobacter
NZ_KN639176.1	882962	883831	WP_038994725.1	AW38_RS04190	GCF_000800615.1	hypothetical protein		Pseudomonas putida	Bacteria; Proteobacteria; Gammaproteobacteria; Pseudomonadales; Pseudomonadaceae; Pseudomonas
NZ_CP009056.1	1165409	1166983	WP_039104452.1	FPB0191_RS05085	GCF_000807275.1	VRR-NUC domain-containing protein	VRR_NUC	Frischella perrara	Bacteria; Proteobacteria; Gammaproteobacteria; Orbales; Orbaceae; Frischella
NZ_CP009056.1	1168543	1170117	WP_039104454.1	FPB0191_RS05095	GCF_000807275.1	hypothetical protein	VRR_NUC	Frischella perrara	Bacteria; Proteobacteria; Gammaproteobacteria; Orbales; Orbaceae; Frischella
NZ_CP009056.1	1171521	1173095	WP_052236782.1	FPB0191_RS11650	GCF_000807275.1	VRR-NUC domain-containing protein	VRR_NUC	Frischella perrara	Bacteria; Proteobacteria; Gammaproteobacteria; Orbales; Orbaceae; Frischella
NZ_JTDQ01000089.1	8444	9148	WP_039201826.1	NCPPB3923_RS08505	GCF_000801065.1	VRR-NUC domain-containing protein	VRR_NUC	Burkholderia glumae	Bacteria; Proteobacteria; Betaproteobacteria; Burkholderiales; Burkholderiaceae; Burkholderia
NZ_JTDQ01000112.1	8122	8853	WP_039202078.1	NCPPB3923_RS09900	GCF_000801065.1	VRR-NUC domain-containing protein	VRR_NUC	Burkholderia glumae	Bacteria; Proteobacteria; Betaproteobacteria; Burkholderiales; Burkholderiaceae; Burkholderia
NZ_JQHP01000005.1	33950	35299	WP_039478283.1	JV38_RS10750	GCF_000749865.1	VRR-NUC domain-containing protein	VRR_NUC+TM+TM	Pectobacterium wasabiae	Bacteria; Proteobacteria; Gammaproteobacteria; Enterobacterales; Pectobacteriaceae; Pectobacterium
NZ_ANJR01000030.1	1384	2463	WP_039790335.1	C785_RS24895	GCF_000478365.1	DUF4150 domain-containing protein	Tox-PAAR-like	Herbaspirillum huttiense subsp. putei IAM 15032	Bacteria; Proteobacteria; Betaproteobacteria; Burkholderiales; Oxalobacteraceae; Herbaspirillum
NZ_ANKP01000145.1	3057	3809	WP_040011109.1	D769_RS17865	GCF_000319775.1	VRR-NUC domain-containing protein	VRR_NUC	Cupriavidus sp. HMR-1	Bacteria; Proteobacteria; Betaproteobacteria; Burkholderiales; Burkholderiaceae; Cupriavidus; unclassified Cupriavidus
NZ_ASZB01000009.1	30429	31772	WP_039995667.1	L580_RS09235	GCF_000468075.1	VRR-NUC domain-containing protein	VRR_NUC+TM+TM	Serratia fonticola AU-P3(3)	Bacteria; Proteobacteria; Gammaproteobacteria; Enterobacterales; Yersiniaceae; Serratia
NZ_ASZB01000011.1	129420	130757	WP_039995778.1	L580_RS12420	GCF_000468075.1	VRR-NUC domain-containing protein	VRR_NUC+TM+TM	Serratia fonticola AU-P3(3)	Bacteria; Proteobacteria; Gammaproteobacteria; Enterobacterales; Yersiniaceae; Serratia
NZ_CP007783.1	3517880	3518644	WP_040128553.1	DM39_RS20640	GCF_000755725.1	VRR-NUC domain-containing protein	VRR_NUC	Burkholderia cenocepacia	Bacteria; Proteobacteria; Betaproteobacteria; Burkholderiales; Burkholderiaceae; Burkholderia; Burkholderia cepacia complex
NC_017067.1	2544541	2545446	WP_041654840.1	MARHY_RS11885	GCF_000284615.1	VRR-NUC domain-containing protein	VRR_NUC	Marinobacter nauticus ATCC 49840	Bacteria; Proteobacteria; Gammaproteobacteria; Pseudomonadales; Marinobacteraceae; Marinobacter
NZ_CDEL01000012.1	56514	57527	WP_042085068.1	BN1171_RS00350	GCF_000825165.1	hypothetical protein		Acinetobacter bereziniae	Bacteria; Proteobacteria; Gammaproteobacteria; Moraxellales; Moraxellaceae; Acinetobacter
NZ_CDEL01000054.1	21535	22248	WP_042086036.1	BN1171_RS02905	GCF_000825165.1	VRR-NUC domain-containing protein	VRR_NUC	Acinetobacter bereziniae	Bacteria; Proteobacteria; Gammaproteobacteria; Moraxellales; Moraxellaceae; Acinetobacter
NZ_CDEL01000130.1	446	1183	WP_042086915.1	BN1171_RS05895	GCF_000825165.1	VRR-NUC domain-containing protein	VRR_NUC	Acinetobacter bereziniae	Bacteria; Proteobacteria; Gammaproteobacteria; Moraxellales; Moraxellaceae; Acinetobacter
NZ_CDEL01000251.1	92731	93705	WP_042089110.1	BN1171_RS15365	GCF_000825165.1	hypothetical protein	TM	Acinetobacter bereziniae	Bacteria; Proteobacteria; Gammaproteobacteria; Moraxellales; Moraxellaceae; Acinetobacter
NZ_BBJG01000113.1	11093	11824	WP_042286926.1	BGL01S_RS35505	GCF_000739755.1	VRR-NUC domain-containing protein	VRR_NUC	Burkholderia gladioli NBRC 13700	Bacteria; Proteobacteria; Betaproteobacteria; Burkholderiales; Burkholderiaceae; Burkholderia
NZ_JRFO01000001.1	1487790	1488485	WP_042583927.1	KY49_RS06955	GCF_000833595.1	VRR-NUC domain-containing protein	VRR_NUC	Burkholderia sp. MSHR3999	Bacteria; Proteobacteria; Betaproteobacteria; Burkholderiales; Burkholderiaceae; Burkholderia
NZ_CP002580.1	959742	960470	WP_042624113.1	BGL_RS04245	GCF_000835205.1	VRR-NUC domain-containing protein	VRR_NUC	Burkholderia plantarii	Bacteria; Proteobacteria; Betaproteobacteria; Burkholderiales; Burkholderiaceae; Burkholderia
NZ_ASSI01000159.1	55052	55804	WP_042976954.1	L810_RS31795	GCF_000466765.1	nuclease	VRR_NUC	Burkholderia sp. AU4i	Bacteria; Proteobacteria; Betaproteobacteria; Burkholderiales; Burkholderiaceae; Burkholderia
NZ_CBLG010000325.1	45	1394	WP_042820808.1	QZ12_RS22460	GCF_000493475.1	VRR-NUC domain-containing protein	VRR_NUC+TM+TM	Yersinia wautersii	Bacteria; Proteobacteria; Gammaproteobacteria; Enterobacterales; Yersiniaceae; Yersinia
NZ_JTRW01000002.1	104698	105399	WP_043089281.1	NS35_RS02945	GCF_000789815.1	VRR-NUC domain-containing protein	VRR_NUC+TM	Pseudomonas aeruginosa	Bacteria; Proteobacteria; Gammaproteobacteria; Pseudomonadales; Pseudomonadaceae; Pseudomonas
NZ_AQOM01000068.1	4842	5591	WP_043225191.1	D589_RS05525	GCF_000365245.1	VRR-NUC domain-containing protein	VRR_NUC	Burkholderia glumae 3252-8	Bacteria; Proteobacteria; Betaproteobacteria; Burkholderiales; Burkholderiaceae; Burkholderia
NZ_AXDS01000032.1	262764	263525	WP_043289941.1	T210_RS22120	GCF_000500655.1	VRR-NUC domain-containing protein	VRR_NUC	Burkholderia pseudomallei MSHR6137	Bacteria; Proteobacteria; Betaproteobacteria; Burkholderiales; Burkholderiaceae; Burkholderia; pseudomallei group
NZ_KL647100.1	202629	203330	WP_043272727.1	FG99_RS24470	GCF_000725445.1	VRR-NUC domain-containing protein	VRR_NUC+TM	Pseudomonas sp. AAC	Bacteria; Proteobacteria; Gammaproteobacteria; Pseudomonadales; Pseudomonadaceae; Pseudomonas
NZ_CP009271.1	2732807	2733538	WP_043275071.1	Y603_RS12080	GCF_000770435.1	VRR-NUC domain-containing protein	VRR_NUC	Burkholderia pseudomallei MSHR1153	Bacteria; Proteobacteria; Betaproteobacteria; Burkholderiales; Burkholderiaceae; Burkholderia; pseudomallei group
NZ_CP004382.1	227468	228205	WP_043296749.1	BTN_RS18205	GCF_000765375.1	VRR-NUC domain-containing protein	VRR_NUC	Burkholderia thailandensis E254	Bacteria; Proteobacteria; Betaproteobacteria; Burkholderiales; Burkholderiaceae; Burkholderia; pseudomallei group
NZ_BCTO01000084.1	33829	34584	WP_043790812.1	DTS01S_RS27785	GCF_001571325.1	hypothetical protein		Delftia tsuruhatensis NBRC 16741	Bacteria; Proteobacteria; Betaproteobacteria; Burkholderiales; Comamonadaceae; Delftia
NC_017532.1	2592113	2592820	WP_043942197.1	PSTAA_RS12005	GCF_000195105.1	VRR-NUC domain-containing protein	VRR_NUC	Pseudomonas stutzeri DSM 4166	Bacteria; Proteobacteria; Gammaproteobacteria; Pseudomonadales; Pseudomonadaceae; Pseudomonas
NZ_AKVS01000047.1	33880	35079	WP_043885461.1	Y17_RS15730	GCF_000291725.1	VRR-NUC domain-containing protein	VRR_NUC	Pectobacterium wasabiae CFBP 3304	Bacteria; Proteobacteria; Gammaproteobacteria; Enterobacterales; Pectobacteriaceae; Pectobacterium
NZ_BBTF01000068.1	14007	15005	WP_043974235.1	Aba26S_RS18830	GCF_000876115.1	hypothetical protein	RE_Bpu10I	Acinetobacter sp. NBRC 110496	Bacteria; Proteobacteria; Gammaproteobacteria; Pseudomonadales; Moraxellaceae; Acinetobacter
NZ_BBTF01000096.1	156	884	WP_043974850.1	Aba26S_RS20345	GCF_000876115.1	VRR-NUC domain-containing protein	VRR_NUC+TM	Acinetobacter sp. NBRC 110496	Bacteria; Proteobacteria; Gammaproteobacteria; Pseudomonadales; Moraxellaceae; Acinetobacter
NZ_JTUW01000050.1	158864	159565	WP_044266417.1	NR56_RS29665	GCF_000794335.1	VRR-NUC domain-containing protein	VRR_NUC+TM	Pseudomonas aeruginosa	Bacteria; Proteobacteria; Gammaproteobacteria; Pseudomonadales; Pseudomonadaceae; Pseudomonas
NZ_JYBG01000001.1	80532	81269	WP_044353065.1	SY87_RS00340	GCF_000932075.1	VRR-NUC domain-containing protein	VRR_NUC	Burkholderia pseudomallei	Bacteria; Proteobacteria; Betaproteobacteria; Burkholderiales; Burkholderiaceae; Burkholderia; pseudomallei group
NZ_JYBG01000030.1	165004	166269	WP_044357850.1	SY87_RS17480	GCF_000932075.1	VRR-NUC domain-containing protein	VRR_NUC+TM+TM	Burkholderia pseudomallei	Bacteria; Proteobacteria; Betaproteobacteria; Burkholderiales; Burkholderiaceae; Burkholderia; pseudomallei group
NZ_JYBJ01000009.1	38831	40114	WP_044369298.1	SZ30_RS12950	GCF_000932095.1	VRR-NUC domain-containing protein	VRR_NUC+TM+TM	Burkholderia pseudomallei	Bacteria; Proteobacteria; Betaproteobacteria; Burkholderiales; Burkholderiaceae; Burkholderia; pseudomallei group
NZ_CP009162.1	2038470	2039228	WP_044490253.1	X993_RS09115	GCF_000770515.1	VRR-NUC domain-containing protein	VRR_NUC	Burkholderia pseudomallei K42	Bacteria; Proteobacteria; Betaproteobacteria; Burkholderiales; Burkholderiaceae; Burkholderia; pseudomallei group
NZ_CP007221.1	3585662	3586357	WP_044750787.1	BE73_RS16135	GCF_000940825.1	VRR-NUC domain-containing protein	VRR_NUC	Xanthomonas oryzae pv. oryzicola	Bacteria; Proteobacteria; Gammaproteobacteria; Xanthomonadales; Xanthomonadaceae; Xanthomonas
NZ_JYOF01000003.1	877	1746	WP_045193994.1	UB48_RS02890	GCF_000955865.1	hypothetical protein		Pseudomonas sp. 2(2015)	Bacteria; Proteobacteria; Gammaproteobacteria; Pseudomonadales; Pseudomonadaceae; Pseudomonas
NZ_JZYR01000014.1	1109	2386	WP_045353008.1	SS21_RS13115	GCF_000957195.1	VRR-NUC domain-containing protein	VRR_NUC+TM+TM	Enterobacter roggenkampii	Bacteria; Proteobacteria; Gammaproteobacteria; Enterobacterales; Enterobacteriaceae; Enterobacter; Enterobacter cloacae complex
NZ_CP009488.1	1015352	1016086	WP_045566606.1	BW23_RS19675	GCF_000959245.1	VRR-NUC domain-containing protein	VRR_NUC	Burkholderia ubonensis MSMB22	Bacteria; Proteobacteria; Betaproteobacteria; Burkholderiales; Burkholderiaceae; Burkholderia; Burkholderia cepacia complex
NZ_KN323068.1	990834	991565	WP_045588115.1	Y048_RS04625	GCF_000774865.1	VRR-NUC domain-containing protein	VRR_NUC	Burkholderia pseudomallei MSHR456	Bacteria; Proteobacteria; Betaproteobacteria; Burkholderiales; Burkholderiaceae; Burkholderia; pseudomallei group
NZ_CP009631.1	407210	407950	WP_045578572.1	AK36_RS11780	GCF_000959445.1	VRR-NUC domain-containing protein	VRR_NUC	Burkholderia vietnamiensis LMG 10929	Bacteria; Proteobacteria; Betaproteobacteria; Burkholderiales; Burkholderiaceae; Burkholderia; Burkholderia cepacia complex
NZ_CP010017.1	86840	87577	WP_045599088.1	BTM_RS01860	GCF_000959605.1	VRR-NUC domain-containing protein	VRR_NUC	Burkholderia thailandensis 34	Bacteria; Proteobacteria; Betaproteobacteria; Burkholderiales; Burkholderiaceae; Burkholderia; pseudomallei group
NZ_CP010017.1	1655394	1656155	WP_045599756.1	BTM_RS08965	GCF_000959605.1	VRR-NUC domain-containing protein	VRR_NUC	Burkholderia thailandensis 34	Bacteria; Proteobacteria; Betaproteobacteria; Burkholderiales; Burkholderiaceae; Burkholderia; pseudomallei group
NZ_CP010017.1	1974129	1974884	WP_045599857.1	BTM_RS10475	GCF_000959605.1	VRR-NUC domain-containing protein	VRR_NUC	Burkholderia thailandensis 34	Bacteria; Proteobacteria; Betaproteobacteria; Burkholderiales; Burkholderiaceae; Burkholderia; pseudomallei group
NZ_JZWP02000003.1	179011	179367	WP_046082386.1	VL22_RS04770	GCF_000968885.2	hypothetical protein		Escherichia fergusonii	Bacteria; Proteobacteria; Gammaproteobacteria; Enterobacterales; Enterobacteriaceae; Escherichia
NZ_LAIM01000039.1	15263	15730	WP_046127517.1	WG84_RS14435	GCF_000969295.1	hypothetical protein	VRR_NUC	Acinetobacter baumannii	Bacteria; Proteobacteria; Gammaproteobacteria; Moraxellales; Moraxellaceae; Acinetobacter; Acinetobacter calcoaceticus/baumannii complex
NZ_JTHJ02000540.1	675	1589	WP_046394232.1	X538_RS23225	GCF_000798635.1	VRR-NUC domain-containing protein	VRR_NUC+TM+TM	Photorhabdus luminescens NBAII HiPL101	Bacteria; Proteobacteria; Gammaproteobacteria; Enterobacterales; Morganellaceae; Photorhabdus
NZ_JTHJ02000541.1	1	1100	WP_046394233.1	X538_RS23230	GCF_000798635.1	VRR-NUC domain-containing protein	VRR_NUC	Photorhabdus luminescens NBAII HiPL101	Bacteria; Proteobacteria; Gammaproteobacteria; Enterobacterales; Morganellaceae; Photorhabdus
NZ_AZAB02000159.1	44	1330	WP_046396629.1	X537_RS14225	GCF_000826725.2	VRR-NUC domain-containing protein	VRR_NUC+TM+TM	Photorhabdus luminescens NBAII H75HRPL105	Bacteria; Proteobacteria; Gammaproteobacteria; Enterobacterales; Morganellaceae; Photorhabdus
NZ_AZAB02000160.1	45	1333	WP_046396630.1	X537_RS14230	GCF_000826725.2	VRR-NUC domain-containing protein	VRR_NUC+TM+TM	Photorhabdus luminescens NBAII H75HRPL105	Bacteria; Proteobacteria; Gammaproteobacteria; Enterobacterales; Morganellaceae; Photorhabdus
NZ_AZAB02000171.1	1	1336	WP_046396744.1	X537_RS14975	GCF_000826725.2	VRR-NUC domain-containing protein	VRR_NUC+TM+TM	Photorhabdus luminescens NBAII H75HRPL105	Bacteria; Proteobacteria; Gammaproteobacteria; Enterobacterales; Morganellaceae; Photorhabdus
NZ_AZAB02000172.1	1	1337	WP_046396746.1	X537_RS14985	GCF_000826725.2	VRR-NUC domain-containing protein	VRR_NUC+TM+TM	Photorhabdus luminescens NBAII H75HRPL105	Bacteria; Proteobacteria; Gammaproteobacteria; Enterobacterales; Morganellaceae; Photorhabdus
NZ_JGYI01000013.1	42519	43400	WP_046483807.1	Y055_RS06025	GCF_000982395.1	hypothetical protein	VRR_NUC	Pseudomonas veronii 1YB2	Bacteria; Proteobacteria; Gammaproteobacteria; Pseudomonadales; Pseudomonadaceae; Pseudomonas
NZ_JGYI01000095.1	32084	32785	WP_046488390.1	Y055_RS22470	GCF_000982395.1	VRR-NUC domain-containing protein	VRR_NUC+TM	Pseudomonas veronii 1YB2	Bacteria; Proteobacteria; Gammaproteobacteria; Pseudomonadales; Pseudomonadaceae; Pseudomonas
NZ_LASC01000002.1	676873	677922	WP_046546851.1	WR30_RS18375	GCF_000987055.1	DUF4150 domain-containing protein	Tox-PAAR-like	Burkholderia contaminans FFH2055	Bacteria; Proteobacteria; Betaproteobacteria; Burkholderiales; Burkholderiaceae; Burkholderia; Burkholderia cepacia complex
NZ_LAVN01000004.1	204593	205297	WP_046577337.1	XF14_RS11300	GCF_000981885.1	VRR-NUC domain-containing protein	VRR_NUC	Burkholderia gladioli	Bacteria; Proteobacteria; Betaproteobacteria; Burkholderiales; Burkholderiaceae; Burkholderia
NZ_CADEZM010000004.1	406546	407862	WP_046574634.1	H9D63_RS08145	GCF_902831795.1	VRR-NUC domain-containing protein	VRR_NUC+TM+TM+TM	Burkholderia gladioli	Bacteria; Proteobacteria; Betaproteobacteria; Burkholderiales; Burkholderiaceae; Burkholderia
NZ_LBNA01000046.1	56530	57504	WP_046760378.1	AAV97_RS08910	GCF_001005515.1	hypothetical protein	TM	Acinetobacter sp. Ag2	Bacteria; Proteobacteria; Gammaproteobacteria; Moraxellales; Moraxellaceae; Acinetobacter
NZ_LBNA01000053.1	141689	142426	WP_046760879.1	AAV97_RS14135	GCF_001005515.1	VRR-NUC domain-containing protein	VRR_NUC+TM	Acinetobacter sp. Ag2	Bacteria; Proteobacteria; Gammaproteobacteria; Moraxellales; Moraxellaceae; Acinetobacter
NZ_LBNA01000055.1	73807	74826	WP_046761005.1	AAV97_RS15480	GCF_001005515.1	nuclease	TM+TM	Acinetobacter sp. Ag2	Bacteria; Proteobacteria; Gammaproteobacteria; Moraxellales; Moraxellaceae; Acinetobacter
NZ_LBHW02000002.1	138202	139029	WP_046804003.1	YH64_RS02825	GCF_001005835.2	VRR-NUC domain-containing protein	VRR_NUC	Achromobacter sp. LC458	Bacteria; Proteobacteria; Betaproteobacteria; Burkholderiales; Alcaligenaceae; Achromobacter; unclassified Achromobacter
NZ_LBHW02000060.1	1606	2439	WP_046807700.1	YH64_RS28090	GCF_001005835.2	VRR-NUC domain-containing protein	SP+VRR_NUC	Achromobacter sp. LC458	Bacteria; Proteobacteria; Betaproteobacteria; Burkholderiales; Alcaligenaceae; Achromobacter; unclassified Achromobacter
NZ_LBHW02000088.1	1092	1931	WP_046807704.1	YH64_RS29945	GCF_001005835.2	VRR-NUC domain-containing protein	SP+VRR_NUC	Achromobacter sp. LC458	Bacteria; Proteobacteria; Betaproteobacteria; Burkholderiales; Alcaligenaceae; Achromobacter; unclassified Achromobacter
NZ_LBHW02000092.1	1092	1931	WP_046807702.1	YH64_RS29985	GCF_001005835.2	VRR-NUC domain-containing protein	SP+VRR_NUC	Achromobacter sp. LC458	Bacteria; Proteobacteria; Betaproteobacteria; Burkholderiales; Alcaligenaceae; Achromobacter; unclassified Achromobacter
NZ_JSWU01000007.1	220068	221513	WP_046893107.1	OA40_RS06815	GCF_001006565.1	VRR-NUC domain-containing protein	VRR_NUC+TM+TM	Morganella morganii	Bacteria; Proteobacteria; Gammaproteobacteria; Enterobacterales; Morganellaceae; Morganella
NZ_CP011104.1	326712	328070	WP_046973619.1	VY86_RS01040	GCF_001010285.1	VRR-NUC domain-containing protein	VRR_NUC+TM+TM	Photorhabdus thracensis	Bacteria; Proteobacteria; Gammaproteobacteria; Enterobacterales; Morganellaceae; Photorhabdus
NZ_CP011104.1	334305	335666	WP_046973622.1	VY86_RS01065	GCF_001010285.1	VRR-NUC domain-containing protein	VRR_NUC+TM+TM	Photorhabdus thracensis	Bacteria; Proteobacteria; Gammaproteobacteria; Enterobacterales; Morganellaceae; Photorhabdus
NZ_CP011104.1	1573352	1574716	WP_046974337.1	VY86_RS06365	GCF_001010285.1	VRR-NUC domain-containing protein	VRR_NUC+TM+TM	Photorhabdus thracensis	Bacteria; Proteobacteria; Gammaproteobacteria; Enterobacterales; Morganellaceae; Photorhabdus
NZ_CP011104.1	1580666	1582024	WP_046974340.1	VY86_RS06395	GCF_001010285.1	VRR-NUC domain-containing protein	VRR_NUC+TM+TM	Photorhabdus thracensis	Bacteria; Proteobacteria; Gammaproteobacteria; Enterobacterales; Morganellaceae; Photorhabdus
NZ_CP011104.1	3108734	3110092	WP_046975336.1	VY86_RS13585	GCF_001010285.1	VRR-NUC domain-containing protein	VRR_NUC+TM+TM	Photorhabdus thracensis	Bacteria; Proteobacteria; Gammaproteobacteria; Enterobacterales; Morganellaceae; Photorhabdus
NZ_JNCQ01000004.1	26310	27065	WP_047217353.1	LZC_RS04950	GCF_001017795.1	hypothetical protein		Delftia lacustris	Bacteria; Proteobacteria; Betaproteobacteria; Burkholderiales; Comamonadaceae; Delftia
NZ_JNCQ01000074.1	10076	10831	WP_047219828.1	LZC_RS30095	GCF_001017795.1	hypothetical protein	VRR_NUC	Delftia lacustris	Bacteria; Proteobacteria; Betaproteobacteria; Burkholderiales; Comamonadaceae; Delftia
NZ_CP007810.1	1106416	1107111	WP_047339622.1	FE36_RS04850	GCF_001021915.1	VRR-NUC domain-containing protein	VRR_NUC	Xanthomonas oryzae pv. oryzicola	Bacteria; Proteobacteria; Gammaproteobacteria; Xanthomonadales; Xanthomonadaceae; Xanthomonas
NZ_LEEI01000027.1	1114	2397	WP_047354435.1	ABR27_RS12155	GCF_001023315.1	VRR-NUC domain-containing protein	VRR_NUC+TM+TM	Enterobacter hormaechei subsp. hormaechei	Bacteria; Proteobacteria; Gammaproteobacteria; Enterobacterales; Enterobacteriaceae; Enterobacter; Enterobacter cloacae complex
NZ_JPQQ01000071.1	24073	24774	WP_047690778.1	JF43_RS24015	GCF_000756575.1	VRR-NUC domain-containing protein	VRR_NUC+TM	Pseudomonas aeruginosa	Bacteria; Proteobacteria; Gammaproteobacteria; Pseudomonadales; Pseudomonadaceae; Pseudomonas
NZ_LDNM01000032.1	42567	44078	WP_047768934.1	AAY47_RS08805	GCF_001028135.1	VRR-NUC domain-containing protein	VRR_NUC+TM+TM	Xenorhabdus griffiniae	Bacteria; Proteobacteria; Gammaproteobacteria; Enterobacterales; Morganellaceae; Xenorhabdus
NZ_LDWP01000022.1	29272	30534	WP_048023027.1	VL13_RS12525	GCF_001038745.1	VRR-NUC domain-containing protein	VRR_NUC+TM+TM	Burkholderia lata	Bacteria; Proteobacteria; Betaproteobacteria; Burkholderiales; Burkholderiaceae; Burkholderia; Burkholderia cepacia complex
NZ_LDWP01000074.1	46822	48087	WP_048026239.1	VL13_RS28780	GCF_001038745.1	VRR-NUC domain-containing protein	TM+TM+VRR_NUC+TM+TM	Burkholderia lata	Bacteria; Proteobacteria; Betaproteobacteria; Burkholderiales; Burkholderiaceae; Burkholderia; Burkholderia cepacia complex
NZ_CP011955.1	1292489	1293184	WP_048483111.1	ACU13_RS05735	GCF_001042745.1	VRR-NUC domain-containing protein	VRR_NUC	Xanthomonas oryzae pv. oryzicola	Bacteria; Proteobacteria; Gammaproteobacteria; Xanthomonadales; Xanthomonadaceae; Xanthomonas
NZ_JYLE01000013.1	47463	48341	WP_048387446.1	TU85_RS08990	GCF_001043065.1	hypothetical protein	VRR_NUC	Pseudomonas helleri	Bacteria; Proteobacteria; Gammaproteobacteria; Pseudomonadales; Pseudomonadaceae; Pseudomonas
NZ_LDUR01000028.1	51911	53101	WP_048415162.1	VK98_RS16995	GCF_001043705.1	VRR-NUC domain-containing protein	VRR_NUC+TM+TM	Chromobacterium sp. LK11	Bacteria; Proteobacteria; Betaproteobacteria; Neisseriales; Chromobacteriaceae; Chromobacterium; unclassified Chromobacterium
NZ_JYLC01000001.1	138648	139349	WP_048521411.1	TU83_RS00725	GCF_001042925.1	VRR-NUC domain-containing protein	VRR_NUC	Pseudomonas aeruginosa	Bacteria; Proteobacteria; Gammaproteobacteria; Pseudomonadales; Pseudomonadaceae; Pseudomonas
NZ_CP008730.1	2485015	2485746	WP_048805740.1	DM80_RS27425	GCF_000756005.1	VRR-NUC domain-containing protein	VRR_NUC	Burkholderia multivorans	Bacteria; Proteobacteria; Betaproteobacteria; Burkholderiales; Burkholderiaceae; Burkholderia; Burkholderia cepacia complex
NZ_JVCR01000064.1	13294	14055	WP_048986016.1	ADB21_RS11420	GCF_001055325.1	VRR-NUC domain-containing protein	VRR_NUC	Burkholderia cenocepacia	Bacteria; Proteobacteria; Betaproteobacteria; Burkholderiales; Burkholderiaceae; Burkholderia; Burkholderia cepacia complex
NZ_JWAD01000476.1	10903	11634	WP_049097242.1	ADA37_RS18060	GCF_001052915.1	VRR-NUC domain-containing protein	VRR_NUC	Burkholderia cepacia	Bacteria; Proteobacteria; Betaproteobacteria; Burkholderiales; Burkholderiaceae; Burkholderia; Burkholderia cepacia complex
NZ_JWAD01000803.1	3719	4483	WP_049097541.1	ADA37_RS30520	GCF_001052915.1	VRR-NUC domain-containing protein	VRR_NUC	Burkholderia cepacia	Bacteria; Proteobacteria; Betaproteobacteria; Burkholderiales; Burkholderiaceae; Burkholderia; Burkholderia cepacia complex
NZ_JVSG01000368.1	763	1464	WP_049288816.1	ADD71_RS05840	GCF_001062835.1	VRR-NUC domain-containing protein	VRR_NUC+TM	Pseudomonas aeruginosa	Bacteria; Proteobacteria; Gammaproteobacteria; Pseudomonadales; Pseudomonadaceae; Pseudomonas
NZ_JXSK01000002.1	496502	497860	WP_049582615.1	TI10_RS07110	GCF_001083805.1	VRR-NUC domain-containing protein	VRR_NUC+TM+TM	Photorhabdus luminescens subsp. luminescens	Bacteria; Proteobacteria; Gammaproteobacteria; Enterobacterales; Morganellaceae; Photorhabdus
NZ_JXSK01000008.1	276525	277883	WP_049584789.1	TI10_RS18195	GCF_001083805.1	VRR-NUC domain-containing protein	VRR_NUC+TM+TM	Photorhabdus luminescens subsp. luminescens	Bacteria; Proteobacteria; Gammaproteobacteria; Enterobacterales; Morganellaceae; Photorhabdus
NZ_JXSK01000014.1	38889	40247	WP_049585714.1	TI10_RS22720	GCF_001083805.1	VRR-NUC domain-containing protein	VRR_NUC+TM+TM	Photorhabdus luminescens subsp. luminescens	Bacteria; Proteobacteria; Gammaproteobacteria; Enterobacterales; Morganellaceae; Photorhabdus
NZ_CQBK01000014.1	115583	116932	WP_049599501.1	AEB14_RS10700	GCF_001114105.1	VRR-NUC domain-containing protein	VRR_NUC+TM+TM	Yersinia similis	Bacteria; Proteobacteria; Gammaproteobacteria; Enterobacterales; Yersiniaceae; Yersinia
NZ_CQBK01000028.1	29523	30821	WP_049600651.1	AEB14_RS15795	GCF_001114105.1	VRR-NUC domain-containing protein	VRR_NUC+TM+TM	Yersinia similis	Bacteria; Proteobacteria; Gammaproteobacteria; Enterobacterales; Yersiniaceae; Yersinia
NZ_CQBK01000056.1	6684	7757	WP_049601620.1	AEB14_RS20125	GCF_001114105.1	DUF4150 domain-containing protein	Tox-PAAR-like	Yersinia similis	Bacteria; Proteobacteria; Gammaproteobacteria; Enterobacterales; Yersiniaceae; Yersinia
NZ_LFIO01000386.1	5504	7015	WP_049732056.1	AF337_RS09965	GCF_001187535.1	DUF4150 domain-containing protein	Tox-PAAR-like	Rhizobium ecuadorense	Bacteria; Proteobacteria; Alphaproteobacteria; Hyphomicrobiales; Rhizobiaceae; Rhizobium/Agrobacterium group; Rhizobium
NZ_KN323069.1	2745417	2746154	WP_050040848.1	Y048_RS29585	GCF_000774865.1	VRR-NUC domain-containing protein	VRR_NUC	Burkholderia pseudomallei MSHR456	Bacteria; Proteobacteria; Betaproteobacteria; Burkholderiales; Burkholderiaceae; Burkholderia; pseudomallei group
NZ_JTLT01000029.1	128656	129363	WP_050015919.1	QX34_RS25420	GCF_000818575.1	VRR-NUC domain-containing protein	VRR_NUC	Burkholderia cenocepacia	Bacteria; Proteobacteria; Betaproteobacteria; Burkholderiales; Burkholderiaceae; Burkholderia; Burkholderia cepacia complex
NZ_CPWG01000012.1	114322	115671	WP_050092894.1	AE401_RS10810	GCF_001123345.1	VRR-NUC domain-containing protein	VRR_NUC+TM+TM	Yersinia pseudotuberculosis	Bacteria; Proteobacteria; Gammaproteobacteria; Enterobacterales; Yersiniaceae; Yersinia
NZ_CPYL01000011.1	64	1413	WP_050103822.1	AEG93_RS09640	GCF_001136465.1	VRR-NUC domain-containing protein	VRR_NUC+TM+TM	Yersinia similis	Bacteria; Proteobacteria; Gammaproteobacteria; Enterobacterales; Yersiniaceae; Yersinia
NZ_CP012159.1	2699733	2702600	WP_050430193.1	CMC5_RS10040	GCF_001189295.1	type VI secretion system tip protein VgrG	Phage_GPD+Phage_base_V+VRR_NUC	Chondromyces crocatus	Bacteria; Proteobacteria; Deltaproteobacteria; Myxococcales; Sorangiineae; Polyangiaceae; Chondromyces
NZ_CP012159.1	2705697	2708657	WP_156338412.1	CMC5_RS10055	GCF_001189295.1	type VI secretion system tip protein VgrG	Phage_GPD+Phage_base_V+VRR_NUC	Chondromyces crocatus	Bacteria; Proteobacteria; Deltaproteobacteria; Myxococcales; Sorangiineae; Polyangiaceae; Chondromyces
NZ_LFJJ01000201.1	7414	8502	WP_050455496.1	BVER_RS24545	GCF_001189365.1	VRR-NUC domain-containing protein	VRR_NUC	Candidatus Burkholderia verschuerenii	Bacteria; Proteobacteria; Betaproteobacteria; Burkholderiales; Burkholderiaceae; Burkholderia
NZ_LGVG01000001.1	392907	393740	WP_050444929.1	AFM18_RS01560	GCF_001189595.1	VRR-NUC domain-containing protein	SP+VRR_NUC	Achromobacter spanius	Bacteria; Proteobacteria; Betaproteobacteria; Burkholderiales; Alcaligenaceae; Achromobacter
NZ_LGVG01000001.1	395322	396158	WP_050444931.1	AFM18_RS01570	GCF_001189595.1	VRR-NUC domain-containing protein	SP+VRR_NUC	Achromobacter spanius	Bacteria; Proteobacteria; Betaproteobacteria; Burkholderiales; Alcaligenaceae; Achromobacter
NZ_LGVG01000015.1	94800	95627	WP_050447412.1	AFM18_RS13720	GCF_001189595.1	VRR-NUC domain-containing protein	VRR_NUC	Achromobacter spanius	Bacteria; Proteobacteria; Betaproteobacteria; Burkholderiales; Alcaligenaceae; Achromobacter
NZ_AYSX01000478.1	6899	7546	WP_050588043.1	W814_RS01000000124575	GCF_000511585.1	VRR-NUC domain-containing protein	VRR_NUC	Xanthomonas oryzae pv. oryzae NAI8	Bacteria; Proteobacteria; Gammaproteobacteria; Xanthomonadales; Xanthomonadaceae; Xanthomonas
NZ_LFLG01000005.1	44003	45292	WP_050861775.1	AKL26_RS03395	GCF_001190105.1	VRR-NUC domain-containing protein	VRR_NUC+TM+TM	Enterobacter kobei	Bacteria; Proteobacteria; Gammaproteobacteria; Enterobacterales; Enterobacteriaceae; Enterobacter; Enterobacter cloacae complex
NZ_CSKN01000015.1	40329	41060	WP_050857095.1	AKV94_RS21430	GCF_001199735.1	VRR-NUC domain-containing protein	VRR_NUC	Burkholderia pseudomallei	Bacteria; Proteobacteria; Betaproteobacteria; Burkholderiales; Burkholderiaceae; Burkholderia; pseudomallei group
NZ_BADF01000145.1	28952	29869	WP_051057372.1	I5Q_RS26805	GCF_000333495.1	hypothetical protein	VRR_NUC+TM+TM	Herbaspirillum sp. B39	Bacteria; Proteobacteria; Betaproteobacteria; Burkholderiales; Oxalobacteraceae; Herbaspirillum; unclassified Herbaspirillum
NZ_AOHM01000043.1	154568	155929	WP_051422051.1	H096_RS15175	GCF_000510895.2	VRR-NUC domain-containing protein	VRR_NUC	Pseudomonas sp. FH1	Bacteria; Proteobacteria; Gammaproteobacteria; Pseudomonadales; Pseudomonadaceae; Pseudomonas; unclassified Pseudomonas fluorescens group
NZ_JADZ01000013.1	3734	4522	WP_051443249.1	L880_RS32220	GCF_000518645.1	hypothetical protein	VRR_NUC	Curvibacter gracilis ATCC BAA-807	Bacteria; Proteobacteria; Betaproteobacteria; Burkholderiales; Comamonadaceae; Curvibacter
NZ_CBXF010000035.1	102436	103803	WP_051462306.1	XSR1_RS03930	GCF_000531455.1	VRR-NUC domain-containing protein	VRR_NUC	Xenorhabdus szentirmaii DSM 16338	Bacteria; Proteobacteria; Gammaproteobacteria; Enterobacterales; Morganellaceae; Xenorhabdus
NZ_KK211050.1	226774	227667	WP_051524073.1	Q387_RS16065	GCF_000620025.1	VRR-NUC domain-containing protein	VRR_NUC+TM	Zymobacter palmae DSM 10491	Bacteria; Proteobacteria; Gammaproteobacteria; Oceanospirillales; Halomonadaceae; Zymobacter group; Zymobacter
NZ_CP006692.1	1908458	1908730	WP_051683605.1	N643_RS20620	GCF_000709535.1	hypothetical protein	TM	Salmonella bongori serovar 48:z41:-- str. RKS3044	Bacteria; Proteobacteria; Gammaproteobacteria; Enterobacterales; Enterobacteriaceae; Salmonella
NZ_JPGM01000071.1	16360	17124	WP_052001548.1	GQ57_RS32085	GCF_000731655.1	VRR-NUC domain-containing protein	VRR_NUC	Burkholderia sp. MSh2	Bacteria; Proteobacteria; Betaproteobacteria; Burkholderiales; Burkholderiaceae; Burkholderia
NZ_JQNP01000001.1	4571148	4571618	WP_051959285.1	FG13_RS20200	GCF_000745325.1	VRR-NUC domain-containing protein	VRR_NUC	Janthinobacterium sp. RA13	Bacteria; Proteobacteria; Betaproteobacteria; Burkholderiales; Oxalobacteraceae; Janthinobacterium
NZ_JQDE01000114.1	91138	91845	WP_052107006.1	X942_RS11005	GCF_000773335.1	VRR-NUC domain-containing protein	VRR_NUC	Burkholderia pseudomallei MSHR5596	Bacteria; Proteobacteria; Betaproteobacteria; Burkholderiales; Burkholderiaceae; Burkholderia; pseudomallei group
NZ_JTGE01000124.1	12983	14218	WP_052247032.1	QR66_RS17805	GCF_000812585.1	VRR-NUC domain-containing protein	VRR_NUC+TM+TM	Chromobacterium piscinae	Bacteria; Proteobacteria; Betaproteobacteria; Neisseriales; Chromobacteriaceae; Chromobacterium
NZ_JONK01000005.1	32544	33722	WP_052370314.1	BR71_RS03875	GCF_000711885.1	VRR-NUC domain-containing protein	VRR_NUC+TM+TM	Chromobacterium haemolyticum DSM 19808	Bacteria; Proteobacteria; Betaproteobacteria; Neisseriales; Chromobacteriaceae; Chromobacterium
NZ_JONK01000014.1	325	1122	WP_052370465.1	BR71_RS09930	GCF_000711885.1	VRR-NUC domain-containing protein	VRR_NUC	Chromobacterium haemolyticum DSM 19808	Bacteria; Proteobacteria; Betaproteobacteria; Neisseriales; Chromobacteriaceae; Chromobacterium
NZ_BBJU01000027.1	21097	22104	WP_052816160.1	RRU01S_RS25070	GCF_000739935.1	DUF4150 domain-containing protein	Tox-PAAR-like	Agrobacterium rubi TR3 = NBRC 13261	Bacteria; Proteobacteria; Alphaproteobacteria; Hyphomicrobiales; Rhizobiaceae; Rhizobium/Agrobacterium group; Agrobacterium
NZ_FO818638.1	64619	66193	WP_052726132.1	XBW1_RS22635	GCF_000973125.1	VRR-NUC domain-containing protein	VRR_NUC+TM+TM	Xenorhabdus bovienii	Bacteria; Proteobacteria; Gammaproteobacteria; Enterobacterales; Morganellaceae; Xenorhabdus
NZ_LBHX02000006.1	5583	6704	WP_052760276.1	YA62_RS14780	GCF_001005815.2	DUF4150 domain-containing protein	Tox-PAAR-like	Agrobacterium sp. LC34	Bacteria; Proteobacteria; Alphaproteobacteria; Hyphomicrobiales; Rhizobiaceae; Rhizobium/Agrobacterium group; Agrobacterium; unclassified Agrobacterium
NZ_KQ414503.1	6227	7363	WP_052819090.1	AKG12_RS12790	GCF_001263295.1	DUF4150 domain-containing protein	Tox-PAAR-like	Agrobacterium sp. SUL3	Bacteria; Proteobacteria; Alphaproteobacteria; Hyphomicrobiales; Rhizobiaceae; Rhizobium/Agrobacterium group; Agrobacterium; unclassified Agrobacterium
NZ_LCWR01000114.1	2446	3681	WP_052941446.1	AB660_RS16835	GCF_001020525.1	VRR-NUC domain-containing protein	VRR_NUC+TM+TM	Chromobacterium subtsugae	Bacteria; Proteobacteria; Betaproteobacteria; Neisseriales; Chromobacteriaceae; Chromobacterium
NZ_LGYC01000010.1	520654	522099	WP_052926733.1	AKG16_RS08470	GCF_001263435.1	VRR-NUC domain-containing protein	VRR_NUC+TM+TM	Morganella morganii	Bacteria; Proteobacteria; Gammaproteobacteria; Enterobacterales; Morganellaceae; Morganella
NZ_JYGI01000020.1	56608	57843	WP_052942174.1	UF16_RS10835	GCF_000952105.1	VRR-NUC domain-containing protein	VRR_NUC+TM+TM	Chromobacterium violaceum	Bacteria; Proteobacteria; Betaproteobacteria; Neisseriales; Chromobacteriaceae; Chromobacterium
NZ_LDWF01000029.1	8207	9370	WP_053076272.1	VL00_RS38990	GCF_001038835.1	hypothetical protein	VRR_NUC	Burkholderia cepacia	Bacteria; Proteobacteria; Betaproteobacteria; Burkholderiales; Burkholderiaceae; Burkholderia; Burkholderia cepacia complex
NZ_LDWR01000024.1	23008	23772	WP_053077646.1	VL15_RS14905	GCF_001039005.1	hypothetical protein	VRR_NUC	Burkholderia cepacia	Bacteria; Proteobacteria; Betaproteobacteria; Burkholderiales; Burkholderiaceae; Burkholderia; Burkholderia cepacia complex
NZ_LHXI01000004.1	286461	287679	WP_053141991.1	AEO89_RS06135	GCF_001269445.1	VRR-NUC domain-containing protein	VRR_NUC+TM	Erwinia billingiae	Bacteria; Proteobacteria; Gammaproteobacteria; Enterobacterales; Erwiniaceae; Erwinia
NZ_LHVB01000011.1	296891	297592	WP_053268871.1	AD678_RS13425	GCF_001269595.1	VRR-NUC domain-containing protein	VRR_NUC+TM	Pseudomonas chlororaphis subsp. aureofaciens	Bacteria; Proteobacteria; Gammaproteobacteria; Pseudomonadales; Pseudomonadaceae; Pseudomonas
NZ_JPZC01000025.1	80711	81478	WP_053296870.1	AI46_RS03305	GCF_001267755.1	VRR-NUC domain-containing protein	VRR_NUC	Burkholderia multivorans R-20526	Bacteria; Proteobacteria; Betaproteobacteria; Burkholderiales; Burkholderiaceae; Burkholderia; Burkholderia cepacia complex
NZ_PVFK01000028.1	3307	4038	WP_053297825.1	C6P92_RS02515	GCF_002980785.1	VRR-NUC domain-containing protein	VRR_NUC	Burkholderia multivorans	Bacteria; Proteobacteria; Betaproteobacteria; Burkholderiales; Burkholderiaceae; Burkholderia; Burkholderia cepacia complex
NZ_LHUI01000106.1	7033	7728	WP_053513243.1	ADT26_RS05650	GCF_001277095.1	VRR-NUC domain-containing protein	VRR_NUC	Xanthomonas oryzae	Bacteria; Proteobacteria; Gammaproteobacteria; Xanthomonadales; Xanthomonadaceae; Xanthomonas
NZ_CP012264.1	2703300	2704601	WP_053531938.1	AFK62_RS12370	GCF_001277255.1	VRR-NUC domain-containing protein	VRR_NUC+TM+TM	Cronobacter condimenti 1330	Bacteria; Proteobacteria; Gammaproteobacteria; Enterobacterales; Enterobacteriaceae; Cronobacter
NZ_CP012576.1	555853	556608	WP_053565596.1	AMS56_RS02600	GCF_001277975.1	VRR-NUC domain-containing protein	VRR_NUC	Burkholderia pseudomallei	Bacteria; Proteobacteria; Betaproteobacteria; Burkholderiales; Burkholderiaceae; Burkholderia; pseudomallei group
NZ_LFWB01000214.1	82	1527	WP_054425613.1	AC068_RS13955	GCF_001274995.1	VRR-NUC domain-containing protein	VRR_NUC+TM+TM	Morganella morganii	Bacteria; Proteobacteria; Gammaproteobacteria; Enterobacterales; Morganellaceae; Morganella
NZ_CYTC01000002.1	723529	724362	WP_054422247.1	AOZ60_RS08450	GCF_001298955.1	VRR-NUC domain-containing protein	SP+VRR_NUC	Achromobacter kerstersii	Bacteria; Proteobacteria; Betaproteobacteria; Burkholderiales; Alcaligenaceae; Achromobacter
NZ_CYTC01000003.1	474842	475696	WP_054422927.1	AOZ60_RS11370	GCF_001298955.1	VRR-NUC domain-containing protein	SP+VRR_NUC	Achromobacter kerstersii	Bacteria; Proteobacteria; Betaproteobacteria; Burkholderiales; Alcaligenaceae; Achromobacter
NZ_JOLL01000007.1	309361	310662	WP_054624254.1	GQ74_RS04430	GCF_001309115.1	VRR-NUC domain-containing protein	VRR_NUC+TM+TM	Cronobacter sakazakii	Bacteria; Proteobacteria; Gammaproteobacteria; Enterobacterales; Enterobacteriaceae; Cronobacter
NZ_CVMG01000038.1	35361	36710	WP_054877677.1	AP309_RS18070	GCF_001319825.1	VRR-NUC domain-containing protein	VRR_NUC+TM+TM	Yersinia wautersii	Bacteria; Proteobacteria; Gammaproteobacteria; Enterobacterales; Yersiniaceae; Yersinia
NZ_BCBL01000015.1	23786	24490	WP_054907061.1	APH38_RS04725	GCF_001320705.1	VRR-NUC domain-containing protein	VRR_NUC	Pseudomonas sp. NBRC 111135	Bacteria; Proteobacteria; Gammaproteobacteria; Pseudomonadales; Pseudomonadaceae; Pseudomonas
NZ_BCBN01000019.1	29946	30644	WP_054897050.1	APH40_RS12520	GCF_001320785.1	VRR-NUC domain-containing protein	VRR_NUC+TM	Pseudomonas sp. NBRC 111137	Bacteria; Proteobacteria; Gammaproteobacteria; Pseudomonadales; Pseudomonadaceae; Pseudomonas
NZ_BCBO01000052.1	63911	64612	WP_054918661.1	APH41_RS09600	GCF_001320835.1	VRR-NUC domain-containing protein	VRR_NUC+TM	Pseudomonas sp. NBRC 111138	Bacteria; Proteobacteria; Gammaproteobacteria; Pseudomonadales; Pseudomonadaceae; Pseudomonas
NZ_LJEO02000199.1	676	1953	WP_055322246.1	AN685_RS22365	GCF_001317055.2	VRR-NUC domain-containing protein	VRR_NUC+TM+TM	Enterobacter roggenkampii	Bacteria; Proteobacteria; Gammaproteobacteria; Enterobacterales; Enterobacteriaceae; Enterobacter; Enterobacter cloacae complex
NZ_LLEZ01000098.1	1520	2518	WP_055415301.1	APD01_RS10200	GCF_001414585.1	hypothetical protein	RE_Bpu10I+VRR_NUC	Acinetobacter soli	Bacteria; Proteobacteria; Gammaproteobacteria; Pseudomonadales; Moraxellaceae; Acinetobacter
NZ_LMNW01000005.1	19663	20373	WP_056152669.1	ASF61_RS06285	GCF_001423125.1	VRR-NUC domain-containing protein	VRR_NUC	Duganella sp. Leaf126	Bacteria; Proteobacteria; Betaproteobacteria; Burkholderiales; Oxalobacteraceae; Massilia group; Duganella; unclassified Duganella
NZ_LMDW01000018.1	152490	153722	WP_056520386.1	ASC92_RS22610	GCF_001425205.1	VRR-NUC domain-containing protein	VRR_NUC+TM+TM	Variovorax sp. Root411	Bacteria; Proteobacteria; Betaproteobacteria; Burkholderiales; Comamonadaceae; Variovorax
NZ_LMED01000011.1	75308	76282	WP_056514153.1	ASC84_RS09770	GCF_001425285.1	hypothetical protein	TM	Acinetobacter sp. Root1280	Bacteria; Proteobacteria; Gammaproteobacteria; Moraxellales; Moraxellaceae; Acinetobacter
NZ_LMCY01000005.1	39324	40313	WP_056437672.1	ASC93_RS04390	GCF_001425685.1	hypothetical protein	TM	Massilia sp. Root335	Bacteria; Proteobacteria; Betaproteobacteria; Burkholderiales; Oxalobacteraceae; Massilia group; Massilia
NZ_CFVL01000013.1	124309	125067	WP_057047559.1	AP827_RS18810	GCF_001326895.1	VRR-NUC domain-containing protein	VRR_NUC	Burkholderia pseudomallei	Bacteria; Proteobacteria; Betaproteobacteria; Burkholderiales; Burkholderiaceae; Burkholderia; pseudomallei group
NZ_JYLJ01000003.1	427406	428284	WP_057022526.1	TU77_RS08085	GCF_001439725.1	hypothetical protein	VRR_NUC	Pseudomonas synxantha	Bacteria; Proteobacteria; Gammaproteobacteria; Pseudomonadales; Pseudomonadaceae; Pseudomonas
NZ_LMIU01000002.1	143243	144073	WP_057283403.1	ASE30_RS06100	GCF_001428845.1	VRR-NUC domain-containing protein	SP+VRR_NUC	Achromobacter sp. Root83	Bacteria; Proteobacteria; Betaproteobacteria; Burkholderiales; Alcaligenaceae; Achromobacter; unclassified Achromobacter
NZ_CTFI01000025.1	174021	174719	WP_057385562.1	AQT00_RS18350	GCF_001374075.1	VRR-NUC domain-containing protein	VRR_NUC	Pseudomonas aeruginosa	Bacteria; Proteobacteria; Gammaproteobacteria; Pseudomonadales; Pseudomonadaceae; Pseudomonas
NZ_AYSZ01000275.1	7407	8114	WP_057389433.1	PAHM4_RS27750	GCF_001431165.1	VRR-NUC domain-containing protein	VRR_NUC	Pseudomonas aeruginosa PAHM4	Bacteria; Proteobacteria; Gammaproteobacteria; Pseudomonadales; Pseudomonadaceae; Pseudomonas
NZ_LJPU01000169.1	89602	90761	WP_057416262.1	ALO86_RS14425	GCF_001401405.1	VRR-NUC domain-containing protein	VRR_NUC+TM	Pseudomonas syringae pv. berberidis	Bacteria; Proteobacteria; Gammaproteobacteria; Pseudomonadales; Pseudomonadaceae; Pseudomonas
NZ_CIKF01000009.1	135480	136829	WP_057532348.1	AP329_RS09210	GCF_001319705.1	VRR-NUC domain-containing protein	VRR_NUC+TM+TM	Yersinia pseudotuberculosis	Bacteria; Proteobacteria; Gammaproteobacteria; Enterobacterales; Yersiniaceae; Yersinia
NZ_CIFL01000043.1	12214	13563	WP_057533938.1	AP355_RS20090	GCF_001319725.1	VRR-NUC domain-containing protein	VRR_NUC+TM+TM	Yersinia pseudotuberculosis	Bacteria; Proteobacteria; Gammaproteobacteria; Enterobacterales; Yersiniaceae; Yersinia
NZ_LJQY01000134.1	654	1940	WP_057447497.1	ALO54_RS07295	GCF_001400595.1	VRR-NUC domain-containing protein	VRR_NUC+TM+TM	Pseudomonas syringae pv. philadelphi	Bacteria; Proteobacteria; Gammaproteobacteria; Pseudomonadales; Pseudomonadaceae; Pseudomonas
NZ_LIVI01000114.1	83	1366	WP_057698638.1	AM270_RS27035	GCF_001420065.1	VRR-NUC domain-containing protein	VRR_NUC+TM+TM	Escherichia coli	Bacteria; Proteobacteria; Gammaproteobacteria; Enterobacterales; Enterobacteriaceae; Escherichia
NZ_JYLN01000004.1	127612	128478	WP_057702372.1	TX23_RS12145	GCF_001439735.1	hypothetical protein	SP+VRR_NUC	Pseudomonas paralactis	Bacteria; Proteobacteria; Gammaproteobacteria; Pseudomonadales; Pseudomonadaceae; Pseudomonas
NZ_JYLN01000005.1	180486	181361	WP_057702846.1	TX23_RS14970	GCF_001439735.1	hypothetical protein	VRR_NUC	Pseudomonas paralactis	Bacteria; Proteobacteria; Gammaproteobacteria; Pseudomonadales; Pseudomonadaceae; Pseudomonas
NZ_JYLO01000003.1	36343	37221	WP_057709847.1	TX24_RS05390	GCF_001439845.1	hypothetical protein	VRR_NUC	Pseudomonas lactis	Bacteria; Proteobacteria; Gammaproteobacteria; Pseudomonadales; Pseudomonadaceae; Pseudomonas
NZ_JYLO01000003.1	38791	39666	WP_057709848.1	TX24_RS05400	GCF_001439845.1	hypothetical protein	VRR_NUC	Pseudomonas lactis	Bacteria; Proteobacteria; Gammaproteobacteria; Pseudomonadales; Pseudomonadaceae; Pseudomonas
NZ_LKPJ01000012.1	238690	240084	WP_057927074.1	AS146_RS18505	GCF_001443045.1	hypothetical protein	VRR_NUC	Burkholderia ambifaria	Bacteria; Proteobacteria; Betaproteobacteria; Burkholderiales; Burkholderiaceae; Burkholderia; Burkholderia cepacia complex
NZ_LJZH01000001.1	1	479	WP_058016842.1	AN456_RS32515	GCF_001444845.1	VRR-NUC domain-containing protein		Pseudomonas aeruginosa	Bacteria; Proteobacteria; Gammaproteobacteria; Pseudomonadales; Pseudomonadaceae; Pseudomonas
NZ_LJZG01000001.1	1	479	WP_058020139.1	AN455_RS32555	GCF_001444995.1	VRR-NUC domain-containing protein		Pseudomonas aeruginosa	Bacteria; Proteobacteria; Gammaproteobacteria; Pseudomonadales; Pseudomonadaceae; Pseudomonas
NZ_LLUM01000003.1	198313	199158	WP_058135620.1	APB45_RS06330	GCF_001454675.1	VRR-NUC domain-containing protein	VRR_NUC	Pseudomonas aeruginosa	Bacteria; Proteobacteria; Gammaproteobacteria; Pseudomonadales; Pseudomonadaceae; Pseudomonas
NZ_LLLR01000001.1	158963	159664	WP_058149714.1	AO900_RS00725	GCF_001449425.1	VRR-NUC domain-containing protein	VRR_NUC+TM	Pseudomonas aeruginosa	Bacteria; Proteobacteria; Gammaproteobacteria; Pseudomonadales; Pseudomonadaceae; Pseudomonas
NZ_LLOE01000018.1	159529	160230	WP_058150065.1	AO965_RS07965	GCF_001450305.1	VRR-NUC domain-containing protein	VRR_NUC+TM	Pseudomonas aeruginosa	Bacteria; Proteobacteria; Gammaproteobacteria; Pseudomonadales; Pseudomonadaceae; Pseudomonas
NZ_LLUF01000023.1	159128	159829	WP_058149062.1	APB38_RS16820	GCF_001453945.1	VRR-NUC domain-containing protein	VRR_NUC+TM	Pseudomonas aeruginosa	Bacteria; Proteobacteria; Gammaproteobacteria; Pseudomonadales; Pseudomonadaceae; Pseudomonas
NZ_LLVG01000070.1	226588	227289	WP_058151075.1	APB65_RS09995	GCF_001454755.1	VRR-NUC domain-containing protein	VRR_NUC+TM	Pseudomonas aeruginosa	Bacteria; Proteobacteria; Gammaproteobacteria; Pseudomonadales; Pseudomonadaceae; Pseudomonas
NZ_LLLV01000012.1	158975	159673	WP_058152383.1	AO904_RS13465	GCF_001449485.1	VRR-NUC domain-containing protein	VRR_NUC	Pseudomonas aeruginosa	Bacteria; Proteobacteria; Gammaproteobacteria; Pseudomonadales; Pseudomonadaceae; Pseudomonas
NZ_LLNH01000023.1	404562	405263	WP_058169006.1	AO942_RS17790	GCF_001450745.1	VRR-NUC domain-containing protein	VRR_NUC+TM	Pseudomonas aeruginosa	Bacteria; Proteobacteria; Gammaproteobacteria; Pseudomonadales; Pseudomonadaceae; Pseudomonas
NZ_LLRS01000046.1	1803	2501	WP_058166637.1	APA73_RS06770	GCF_001452325.1	VRR-NUC domain-containing protein	VRR_NUC	Pseudomonas aeruginosa	Bacteria; Proteobacteria; Gammaproteobacteria; Pseudomonadales; Pseudomonadaceae; Pseudomonas
NZ_LLUL01000012.1	429557	430258	WP_058170282.1	APB44_RS12225	GCF_001454095.1	VRR-NUC domain-containing protein	VRR_NUC+TM	Pseudomonas aeruginosa	Bacteria; Proteobacteria; Gammaproteobacteria; Pseudomonadales; Pseudomonadaceae; Pseudomonas
NZ_LLPH01000002.1	58457	59164	WP_058178169.1	AO994_RS05725	GCF_001453145.1	VRR-NUC domain-containing protein	VRR_NUC	Pseudomonas aeruginosa	Bacteria; Proteobacteria; Gammaproteobacteria; Pseudomonadales; Pseudomonadaceae; Pseudomonas
NZ_LLVB01000001.1	200876	201544	WP_058173003.1	APB60_RS00980	GCF_001454335.1	VRR-NUC domain-containing protein	VRR_NUC+TM	Pseudomonas aeruginosa	Bacteria; Proteobacteria; Gammaproteobacteria; Pseudomonadales; Pseudomonadaceae; Pseudomonas
NZ_JPQQ01000018.1	18459	19166	WP_058199715.1	JF43_RS30700	GCF_000756575.1	VRR-NUC domain-containing protein	VRR_NUC	Pseudomonas aeruginosa	Bacteria; Proteobacteria; Gammaproteobacteria; Pseudomonadales; Pseudomonadaceae; Pseudomonas
NZ_LLOP01000029.1	200	679	WP_058195790.1	AO976_RS08865	GCF_001451075.1	VRR-NUC domain-containing protein	VRR_NUC	Pseudomonas aeruginosa	Bacteria; Proteobacteria; Gammaproteobacteria; Pseudomonadales; Pseudomonadaceae; Pseudomonas
NZ_LLTW01000012.1	165765	166463	WP_058200298.1	APB29_RS09225	GCF_001452995.1	VRR-NUC domain-containing protein	VRR_NUC	Pseudomonas aeruginosa	Bacteria; Proteobacteria; Gammaproteobacteria; Pseudomonadales; Pseudomonadaceae; Pseudomonas
NZ_LLQU01000001.1	656052	656753	WP_058202479.1	APA49_RS03080	GCF_001453315.1	VRR-NUC domain-containing protein	VRR_NUC+TM	Pseudomonas aeruginosa	Bacteria; Proteobacteria; Gammaproteobacteria; Pseudomonadales; Pseudomonadaceae; Pseudomonas
NZ_LKGY01000080.1	19304	20593	WP_058413856.1	AO391_RS15550	GCF_001467265.1	VRR-NUC domain-containing protein	VRR_NUC+TM+TM	Pseudomonas marginalis ICMP 9505	Bacteria; Proteobacteria; Gammaproteobacteria; Pseudomonadales; Pseudomonadaceae; Pseudomonas
NZ_LKGU01000007.1	97621	98907	WP_058417893.1	AO386_RS07405	GCF_001467365.1	VRR-NUC domain-containing protein	DUF3146+VRR_NUC+DUF3168+TM+TM	Pseudomonas syringae ICMP 11292	Bacteria; Proteobacteria; Gammaproteobacteria; Pseudomonadales; Pseudomonadaceae; Pseudomonas; Pseudomonas syringae
NZ_LJPB01000239.1	5926	7284	WP_058589453.1	AA106_RS17370	GCF_001473245.1	VRR-NUC domain-containing protein	VRR_NUC+TM+TM	Photorhabdus laumondii subsp. laumondii	Bacteria; Proteobacteria; Gammaproteobacteria; Enterobacterales; Morganellaceae; Photorhabdus
NZ_LPPM01000002.1	159786	161066	WP_058680268.1	ASV00_RS02215	GCF_001472555.1	VRR-NUC domain-containing protein	VRR_NUC+TM+TM	Enterobacter cloacae subsp. cloacae	Bacteria; Proteobacteria; Gammaproteobacteria; Enterobacterales; Enterobacteriaceae; Enterobacter; Enterobacter cloacae complex
NZ_JYXQ01000018.1	1844	3133	WP_058819877.1	DE43_RS10710	GCF_001478385.1	VRR-NUC domain-containing protein	VRR_NUC+TM+TM	Salmonella enterica subsp. arizonae serovar 18:z4,z23:-	Bacteria; Proteobacteria; Gammaproteobacteria; Enterobacterales; Enterobacteriaceae; Salmonella
NZ_CP013729.1	2955335	2956384	WP_058935174.1	RD2015_RS12570	GCF_001483865.1	DUF4150 domain-containing protein	Tox-PAAR-like	Roseateles depolymerans	Bacteria; Proteobacteria; Betaproteobacteria; Burkholderiales; Roseateles
NZ_LKDJ02000001.1	528628	529365	WP_058967597.1	NDM229_RS03590	GCF_001500155.2	VRR-NUC domain-containing protein	VRR_NUC	Acinetobacter bereziniae	Bacteria; Proteobacteria; Gammaproteobacteria; Moraxellales; Moraxellaceae; Acinetobacter
NZ_LKDJ02000001.1	3607530	3608243	WP_058968684.1	NDM229_RS18115	GCF_001500155.2	VRR-NUC domain-containing protein	VRR_NUC	Acinetobacter bereziniae	Bacteria; Proteobacteria; Gammaproteobacteria; Moraxellales; Moraxellaceae; Acinetobacter
NZ_LJFM01000015.1	89712	91007	WP_058974452.1	PsaCFBP8043_RS13535	GCF_001497495.1	VRR-NUC domain-containing protein	VRR_NUC+TM+TM	Pseudomonas syringae pv. actinidifoliorum	Bacteria; Proteobacteria; Gammaproteobacteria; Pseudomonadales; Pseudomonadaceae; Pseudomonas; Pseudomonas syringae
NZ_LJJL01000021.1	842	2137	WP_059003634.1	PsaCFBP8160_RS16090	GCF_001497555.1	VRR-NUC domain-containing protein	VRR_NUC+TM+TM	Pseudomonas syringae pv. actinidifoliorum	Bacteria; Proteobacteria; Gammaproteobacteria; Pseudomonadales; Pseudomonadaceae; Pseudomonas; Pseudomonas syringae
NZ_LKDJ02000001.1	1171153	1172166	WP_058971509.1	NDM229_RS06580	GCF_001500155.2	hypothetical protein	TM+TM	Acinetobacter bereziniae	Bacteria; Proteobacteria; Gammaproteobacteria; Moraxellales; Moraxellaceae; Acinetobacter
NZ_KQ947477.1	32138	32983	WP_059123268.1	VRK_RS19990	GCF_001506075.1	VRR-NUC domain-containing protein	VRR_NUC	Vibrio sp. MEBiC08052	Bacteria; Proteobacteria; Gammaproteobacteria; Vibrionales; Vibrionaceae; Vibrio
NZ_LN865164.1	3912149	3913402	WP_059183831.1	PSHI_RS17520	GCF_001511775.1	VRR-NUC domain-containing protein	VRR_NUC+TM+TM	Pseudomonas sp. URMO17WK12:I11	Bacteria; Proteobacteria; Gammaproteobacteria; Pseudomonadales; Pseudomonadaceae; Pseudomonas
NZ_CP072743.1	168822	170165	WP_059202287.1	J8M99_RS25880	GCF_019252525.1	VRR-NUC domain-containing protein	VRR_NUC+TM+TM	Serratia fonticola	Bacteria; Proteobacteria; Gammaproteobacteria; Enterobacterales; Yersiniaceae; Serratia
NZ_CP008861.1	1955946	1956653	WP_059309715.1	HW05_RS09030	GCF_001516345.1	VRR-NUC domain-containing protein	VRR_NUC	Pseudomonas aeruginosa	Bacteria; Proteobacteria; Gammaproteobacteria; Pseudomonadales; Pseudomonadaceae; Pseudomonas
NZ_CP013989.1	4726987	4727688	WP_059349724.1	APT60_RS21750	GCF_001518975.1	VRR-NUC domain-containing protein	VRR_NUC+TM	Pseudomonas aeruginosa	Bacteria; Proteobacteria; Gammaproteobacteria; Pseudomonadales; Pseudomonadaceae; Pseudomonas
NZ_LOWL01000027.1	110009	110779	WP_059454838.1	WJ01_RS11010	GCF_001523705.1	VRR-NUC domain-containing protein	VRR_NUC	Burkholderia vietnamiensis	Bacteria; Proteobacteria; Betaproteobacteria; Burkholderiales; Burkholderiaceae; Burkholderia; Burkholderia cepacia complex
NZ_LOWL01000044.1	121363	122103	WP_059456335.1	WJ01_RS23225	GCF_001523705.1	VRR-NUC domain-containing protein	VRR_NUC	Burkholderia vietnamiensis	Bacteria; Proteobacteria; Betaproteobacteria; Burkholderiales; Burkholderiaceae; Burkholderia; Burkholderia cepacia complex
NZ_LOWI01000046.1	20917	21681	WP_059459141.1	WI98_RS17820	GCF_001523785.1	VRR-NUC domain-containing protein	VRR_NUC	Burkholderia vietnamiensis	Bacteria; Proteobacteria; Betaproteobacteria; Burkholderiales; Burkholderiaceae; Burkholderia; Burkholderia cepacia complex
NZ_LOWS01000102.1	40610	41374	WP_059461902.1	WJ09_RS27115	GCF_001524045.1	VRR-NUC domain-containing protein	VRR_NUC	Burkholderia vietnamiensis	Bacteria; Proteobacteria; Betaproteobacteria; Burkholderiales; Burkholderiaceae; Burkholderia; Burkholderia cepacia complex
NZ_LOVG01000094.1	6593	7363	WP_059482405.1	WI79_RS21945	GCF_001523385.1	VRR-NUC domain-containing protein	VRR_NUC	Burkholderia ubonensis	Bacteria; Proteobacteria; Betaproteobacteria; Burkholderiales; Burkholderiaceae; Burkholderia; Burkholderia cepacia complex
NZ_LOXO01000016.1	46289	47020	WP_059478624.1	WS80_RS06580	GCF_001524505.1	VRR-NUC domain-containing protein	VRR_NUC	Burkholderia pseudomultivorans	Bacteria; Proteobacteria; Betaproteobacteria; Burkholderiales; Burkholderiaceae; Burkholderia; Burkholderia cepacia complex
NZ_LOTZ01000059.1	179598	180860	WP_059492425.1	WI49_RS13660	GCF_001521915.1	VRR-NUC domain-containing protein	VRR_NUC+TM+TM	Burkholderia cepacia	Bacteria; Proteobacteria; Betaproteobacteria; Burkholderiales; Burkholderiaceae; Burkholderia; Burkholderia cepacia complex
NZ_LOUV01000058.1	154547	155311	WP_059516935.1	WS56_RS10755	GCF_001523105.1	VRR-NUC domain-containing protein	VRR_NUC	Burkholderia pseudomultivorans	Bacteria; Proteobacteria; Betaproteobacteria; Burkholderiales; Burkholderiaceae; Burkholderia; Burkholderia cepacia complex
NZ_LOTA01000040.1	4437	5726	WP_059530872.1	WS49_RS16715	GCF_001521935.1	VRR-NUC domain-containing protein	VRR_NUC+TM+TM	Burkholderia sp. RF7-non_BP4	Bacteria; Proteobacteria; Betaproteobacteria; Burkholderiales; Burkholderiaceae; Burkholderia
NZ_LOVT01000008.1	121426	122187	WP_059558429.1	WS63_RS03245	GCF_001523845.1	VRR-NUC domain-containing protein	VRR_NUC	Burkholderia stagnalis	Bacteria; Proteobacteria; Betaproteobacteria; Burkholderiales; Burkholderiaceae; Burkholderia; Burkholderia cepacia complex
NZ_LOWN01000021.1	124104	124844	WP_059560246.1	WJ04_RS12975	GCF_001523945.1	VRR-NUC domain-containing protein	VRR_NUC	Burkholderia vietnamiensis	Bacteria; Proteobacteria; Betaproteobacteria; Burkholderiales; Burkholderiaceae; Burkholderia; Burkholderia cepacia complex
NZ_LOWQ01000063.1	2528	3292	WP_059580192.1	WJ07_RS16850	GCF_001524005.1	VRR-NUC domain-containing protein	VRR_NUC	Burkholderia vietnamiensis	Bacteria; Proteobacteria; Betaproteobacteria; Burkholderiales; Burkholderiaceae; Burkholderia; Burkholderia cepacia complex
NZ_LOVB01000049.1	98927	100192	WP_059588859.1	WI74_RS10950	GCF_001523225.1	VRR-NUC domain-containing protein	VRR_NUC+TM+TM	Burkholderia ubonensis	Bacteria; Proteobacteria; Betaproteobacteria; Burkholderiales; Burkholderiaceae; Burkholderia; Burkholderia cepacia complex
NZ_LOVB01000108.1	4495	5223	WP_059592485.1	WI74_RS26800	GCF_001523225.1	VRR-NUC domain-containing protein	VRR_NUC	Burkholderia ubonensis	Bacteria; Proteobacteria; Betaproteobacteria; Burkholderiales; Burkholderiaceae; Burkholderia; Burkholderia cepacia complex
NZ_CP013384.1	421281	422021	WP_059599831.1	WS66_RS14575	GCF_001523915.2	VRR-NUC domain-containing protein	VRR_NUC	Burkholderia sp. LA-2-3-30-S1-D2	Bacteria; Proteobacteria; Betaproteobacteria; Burkholderiales; Burkholderiaceae; Burkholderia
NZ_LOUW01000105.1	111192	111956	WP_059605214.1	WS58_RS29070	GCF_001525825.1	VRR-NUC domain-containing protein	VRR_NUC	Burkholderia pseudomultivorans	Bacteria; Proteobacteria; Betaproteobacteria; Burkholderiales; Burkholderiaceae; Burkholderia; Burkholderia cepacia complex
NZ_LOVU01000085.1	5212	5916	WP_059615675.1	WI90_RS23915	GCF_001523855.1	VRR-NUC domain-containing protein	VRR_NUC	Burkholderia ubonensis	Bacteria; Proteobacteria; Betaproteobacteria; Burkholderiales; Burkholderiaceae; Burkholderia; Burkholderia cepacia complex
NZ_CP013425.1	1388937	1389674	WP_059641239.1	WS86_RS26515	GCF_001524625.2	VRR-NUC domain-containing protein	VRR_NUC	Burkholderia savannae	Bacteria; Proteobacteria; Betaproteobacteria; Burkholderiales; Burkholderiaceae; Burkholderia; pseudomallei group
NZ_LOVD01000023.1	462626	463309	WP_059642690.1	WI76_RS11080	GCF_001525855.1	VRR-NUC domain-containing protein	DUF4776+VRR_NUC	Burkholderia ubonensis	Bacteria; Proteobacteria; Betaproteobacteria; Burkholderiales; Burkholderiaceae; Burkholderia; Burkholderia cepacia complex
NZ_LOXJ01000056.1	142774	144039	WP_059656719.1	WJ31_RS21850	GCF_001524405.1	VRR-NUC domain-containing protein	VRR_NUC+TM+TM	Burkholderia ubonensis	Bacteria; Proteobacteria; Betaproteobacteria; Burkholderiales; Burkholderiaceae; Burkholderia; Burkholderia cepacia complex
NZ_LOXJ01000064.1	253273	254004	WP_059657721.1	WJ31_RS29510	GCF_001524405.1	VRR-NUC domain-containing protein	VRR_NUC	Burkholderia ubonensis	Bacteria; Proteobacteria; Betaproteobacteria; Burkholderiales; Burkholderiaceae; Burkholderia; Burkholderia cepacia complex
NZ_LOVE01000022.1	74044	74772	WP_059659764.1	WI77_RS04265	GCF_001525885.1	VRR-NUC domain-containing protein	VRR_NUC	Burkholderia ubonensis	Bacteria; Proteobacteria; Betaproteobacteria; Burkholderiales; Burkholderiaceae; Burkholderia; Burkholderia cepacia complex
NZ_LOVE01000099.1	39186	39917	WP_059662919.1	WI77_RS18175	GCF_001525885.1	VRR-NUC domain-containing protein	VRR_NUC	Burkholderia ubonensis	Bacteria; Proteobacteria; Betaproteobacteria; Burkholderiales; Burkholderiaceae; Burkholderia; Burkholderia cepacia complex
NZ_LOTU01000030.1	46834	48117	WP_059675862.1	WI44_RS10270	GCF_001522215.1	VRR-NUC domain-containing protein	VRR_NUC+TM+TM	Burkholderia cepacia	Bacteria; Proteobacteria; Betaproteobacteria; Burkholderiales; Burkholderiaceae; Burkholderia; Burkholderia cepacia complex
NZ_LOTU01000059.1	2610	3872	WP_059677114.1	WI44_RS22165	GCF_001522215.1	VRR-NUC domain-containing protein	VRR_NUC+TM+TM	Burkholderia cepacia	Bacteria; Proteobacteria; Betaproteobacteria; Burkholderiales; Burkholderiaceae; Burkholderia; Burkholderia cepacia complex
NZ_LOWY01000022.1	861	1565	WP_059680423.1	WS75_RS10450	GCF_001524185.1	VRR-NUC domain-containing protein	VRR_NUC	Burkholderia sp. FL-7-2-10-S1-D7	Bacteria; Proteobacteria; Betaproteobacteria; Burkholderiales; Burkholderiaceae; Burkholderia
NZ_LOSX01000039.1	137499	138788	WP_059691052.1	WS46_RS15605	GCF_001521985.1	VRR-NUC domain-containing protein	VRR_NUC+TM+TM	Burkholderia sp. RF4-BP95	Bacteria; Proteobacteria; Betaproteobacteria; Burkholderiales; Burkholderiaceae; Burkholderia
NZ_LOVV01000015.1	109975	110703	WP_059694936.1	WI91_RS07340	GCF_001523585.1	VRR-NUC domain-containing protein	VRR_NUC	Burkholderia vietnamiensis	Bacteria; Proteobacteria; Betaproteobacteria; Burkholderiales; Burkholderiaceae; Burkholderia; Burkholderia cepacia complex
NZ_LOYE01000058.1	42766	43545	WP_059715422.1	WJ41_RS11850	GCF_001524745.1	hypothetical protein	VRR_NUC	Burkholderia ubonensis	Bacteria; Proteobacteria; Betaproteobacteria; Burkholderiales; Burkholderiaceae; Burkholderia; Burkholderia cepacia complex
NZ_LOYE01000059.1	97049	98314	WP_059715515.1	WJ41_RS12450	GCF_001524745.1	VRR-NUC domain-containing protein	VRR_NUC+TM+TM	Burkholderia ubonensis	Bacteria; Proteobacteria; Betaproteobacteria; Burkholderiales; Burkholderiaceae; Burkholderia; Burkholderia cepacia complex
NZ_LOYE01000101.1	401617	402882	WP_059716913.1	WJ41_RS23995	GCF_001524745.1	VRR-NUC domain-containing protein	TM+TM+VRR_NUC+TM+TM	Burkholderia ubonensis	Bacteria; Proteobacteria; Betaproteobacteria; Burkholderiales; Burkholderiaceae; Burkholderia; Burkholderia cepacia complex
NZ_LOYH01000040.1	6801	8066	WP_059729321.1	WS90_RS10770	GCF_001526205.1	VRR-NUC domain-containing protein	VRR_NUC+TM+TM	Burkholderia cepacia	Bacteria; Proteobacteria; Betaproteobacteria; Burkholderiales; Burkholderiaceae; Burkholderia; Burkholderia cepacia complex
NZ_LOYL01000052.1	51208	51915	WP_059771734.1	WS94_RS18245	GCF_001526285.1	VRR-NUC domain-containing protein	VRR_NUC	Burkholderia territorii	Bacteria; Proteobacteria; Betaproteobacteria; Burkholderiales; Burkholderiaceae; Burkholderia; Burkholderia cepacia complex
NZ_LOYC01000010.1	128947	129678	WP_059789806.1	WS89_RS05715	GCF_001524725.1	VRR-NUC domain-containing protein	VRR_NUC	Burkholderia sp. MSMB1072	Bacteria; Proteobacteria; Betaproteobacteria; Burkholderiales; Burkholderiaceae; Burkholderia
NZ_LPBD01000060.1	94298	95068	WP_059787294.1	WJ90_RS12130	GCF_001527145.1	VRR-NUC domain-containing protein	VRR_NUC	Burkholderia ubonensis	Bacteria; Proteobacteria; Betaproteobacteria; Burkholderiales; Burkholderiaceae; Burkholderia; Burkholderia cepacia complex
NZ_LOYM01000133.1	303829	305094	WP_059809106.1	WJ45_RS33320	GCF_001526305.1	VRR-NUC domain-containing protein	VRR_NUC+TM+TM	Burkholderia ubonensis	Bacteria; Proteobacteria; Betaproteobacteria; Burkholderiales; Burkholderiaceae; Burkholderia; Burkholderia cepacia complex
NZ_LPBO01000022.1	635295	636560	WP_059814167.1	WK01_RS15680	GCF_001526905.1	VRR-NUC domain-containing protein	TM+TM+VRR_NUC+TM+TM	Burkholderia cepacia	Bacteria; Proteobacteria; Betaproteobacteria; Burkholderiales; Burkholderiaceae; Burkholderia; Burkholderia cepacia complex
NZ_LOYP01000005.1	147938	148669	WP_059830768.1	WS96_RS03840	GCF_001526365.1	VRR-NUC domain-containing protein	VRR_NUC	Burkholderia sp. MSMB1835	Bacteria; Proteobacteria; Betaproteobacteria; Burkholderiales; Burkholderiaceae; Burkholderia
NZ_LOXF01000047.1	20323	21030	WP_059844311.1	WJ25_RS10390	GCF_001524325.1	VRR-NUC domain-containing protein	VRR_NUC	Burkholderia thailandensis	Bacteria; Proteobacteria; Betaproteobacteria; Burkholderiales; Burkholderiaceae; Burkholderia; pseudomallei group
NZ_LPAX01000030.1	213703	214437	WP_059834041.1	WJ84_RS09155	GCF_001526865.1	VRR-NUC domain-containing protein	VRR_NUC	Burkholderia ubonensis	Bacteria; Proteobacteria; Betaproteobacteria; Burkholderiales; Burkholderiaceae; Burkholderia; Burkholderia cepacia complex
NZ_LPAX01000102.1	125863	126546	WP_059838097.1	WJ84_RS31985	GCF_001526865.1	VRR-NUC domain-containing protein	DUF4776+VRR_NUC	Burkholderia ubonensis	Bacteria; Proteobacteria; Betaproteobacteria; Burkholderiales; Burkholderiaceae; Burkholderia; Burkholderia cepacia complex
NZ_LPBX01000020.1	195120	195851	WP_059841584.1	WK07_RS08380	GCF_001528045.1	VRR-NUC domain-containing protein	VRR_NUC	Burkholderia multivorans	Bacteria; Proteobacteria; Betaproteobacteria; Burkholderiales; Burkholderiaceae; Burkholderia; Burkholderia cepacia complex
NZ_LPAV01000079.1	43403	44134	WP_059846846.1	WJ83_RS21150	GCF_001526625.1	VRR-NUC domain-containing protein	VRR_NUC	Burkholderia ubonensis	Bacteria; Proteobacteria; Betaproteobacteria; Burkholderiales; Burkholderiaceae; Burkholderia; Burkholderia cepacia complex
NZ_LPAL01000053.1	96614	97876	WP_059853109.1	WJ76_RS09725	GCF_001526735.1	VRR-NUC domain-containing protein	VRR_NUC+TM+TM	Burkholderia ubonensis	Bacteria; Proteobacteria; Betaproteobacteria; Burkholderiales; Burkholderiaceae; Burkholderia; Burkholderia cepacia complex
NZ_LOZC01000091.1	100103	101368	WP_059869634.1	WJ51_RS31960	GCF_001527325.1	VRR-NUC domain-containing protein	VRR_NUC+TM+TM	Burkholderia ubonensis	Bacteria; Proteobacteria; Betaproteobacteria; Burkholderiales; Burkholderiaceae; Burkholderia; Burkholderia cepacia complex
NZ_LPAM01000036.1	89213	89974	WP_059881962.1	WT17_RS11125	GCF_001526825.1	VRR-NUC domain-containing protein	VRR_NUC	Burkholderia stagnalis	Bacteria; Proteobacteria; Betaproteobacteria; Burkholderiales; Burkholderiaceae; Burkholderia; Burkholderia cepacia complex
NZ_LPBV01000099.1	252686	253948	WP_059880439.1	WK05_RS30765	GCF_001527085.1	VRR-NUC domain-containing protein	VRR_NUC+TM+TM	Burkholderia ubonensis	Bacteria; Proteobacteria; Betaproteobacteria; Burkholderiales; Burkholderiaceae; Burkholderia; Burkholderia cepacia complex
NZ_LPAM01000071.1	6028	6759	WP_059883715.1	WT17_RS18955	GCF_001526825.1	VRR-NUC domain-containing protein	VRR_NUC	Burkholderia stagnalis	Bacteria; Proteobacteria; Betaproteobacteria; Burkholderiales; Burkholderiaceae; Burkholderia; Burkholderia cepacia complex
NZ_LOZL01000046.1	3008	3739	WP_059893960.1	WJ60_RS10615	GCF_001527505.1	VRR-NUC domain-containing protein	VRR_NUC	Burkholderia ubonensis	Bacteria; Proteobacteria; Betaproteobacteria; Burkholderiales; Burkholderiaceae; Burkholderia; Burkholderia cepacia complex
NZ_LPBM01000051.1	87255	87989	WP_059903424.1	WJ99_RS17270	GCF_001526915.1	VRR-NUC domain-containing protein	VRR_NUC	Burkholderia ubonensis	Bacteria; Proteobacteria; Betaproteobacteria; Burkholderiales; Burkholderiaceae; Burkholderia; Burkholderia cepacia complex
NZ_LOYZ01000028.1	168239	168922	WP_059906751.1	WT02_RS11240	GCF_001527265.1	VRR-NUC domain-containing protein	DUF4776+VRR_NUC	Burkholderia stagnalis	Bacteria; Proteobacteria; Betaproteobacteria; Burkholderiales; Burkholderiaceae; Burkholderia; Burkholderia cepacia complex
NZ_LPBH01000055.1	306303	307040	WP_059912619.1	WJ94_RS17625	GCF_001527015.1	VRR-NUC domain-containing protein	VRR_NUC	Burkholderia ubonensis	Bacteria; Proteobacteria; Betaproteobacteria; Burkholderiales; Burkholderiaceae; Burkholderia; Burkholderia cepacia complex
NZ_LOZS01000068.1	91067	91813	WP_059922603.1	WT09_RS16210	GCF_001527645.1	hypothetical protein	VRR_NUC	Burkholderia stagnalis	Bacteria; Proteobacteria; Betaproteobacteria; Burkholderiales; Burkholderiaceae; Burkholderia; Burkholderia cepacia complex
NZ_LOZR01000024.1	1811	2548	WP_059929866.1	WT08_RS05190	GCF_001527625.1	VRR-NUC domain-containing protein	VRR_NUC	Burkholderia sp. MSMB1552	Bacteria; Proteobacteria; Betaproteobacteria; Burkholderiales; Burkholderiaceae; Burkholderia; pseudomallei group
NZ_LPDO01000040.1	351946	352677	WP_059927070.1	WK53_RS08765	GCF_001528875.1	VRR-NUC domain-containing protein	VRR_NUC	Burkholderia ubonensis	Bacteria; Proteobacteria; Betaproteobacteria; Burkholderiales; Burkholderiaceae; Burkholderia; Burkholderia cepacia complex
NZ_LPDO01000118.1	7768	8502	WP_059932042.1	WK53_RS25665	GCF_001528875.1	VRR-NUC domain-containing protein	VRR_NUC	Burkholderia ubonensis	Bacteria; Proteobacteria; Betaproteobacteria; Burkholderiales; Burkholderiaceae; Burkholderia; Burkholderia cepacia complex
NZ_LPCC01000048.1	4736	5503	WP_059933468.1	WK12_RS12330	GCF_001528325.1	VRR-NUC domain-containing protein	VRR_NUC	Burkholderia ubonensis	Bacteria; Proteobacteria; Betaproteobacteria; Burkholderiales; Burkholderiaceae; Burkholderia; Burkholderia cepacia complex
NZ_LPCF01000073.1	28305	28988	WP_059938561.1	WK15_RS22115	GCF_001528385.1	VRR-NUC domain-containing protein	DUF4776+VRR_NUC	Burkholderia ubonensis	Bacteria; Proteobacteria; Betaproteobacteria; Burkholderiales; Burkholderiaceae; Burkholderia; Burkholderia cepacia complex
NZ_LPDO01000141.1	64777	66039	WP_059933425.1	WK53_RS30820	GCF_001528875.1	VRR-NUC domain-containing protein	VRR_NUC+TM+TM	Burkholderia ubonensis	Bacteria; Proteobacteria; Betaproteobacteria; Burkholderiales; Burkholderiaceae; Burkholderia; Burkholderia cepacia complex
NZ_LPAE01000040.1	3564	4295	WP_059946649.1	WJ69_RS05375	GCF_001527885.1	VRR-NUC domain-containing protein	VRR_NUC	Burkholderia ubonensis	Bacteria; Proteobacteria; Betaproteobacteria; Burkholderiales; Burkholderiaceae; Burkholderia; Burkholderia cepacia complex
NZ_LPAE01000083.1	43993	45258	WP_059948266.1	WJ69_RS16720	GCF_001527885.1	VRR-NUC domain-containing protein	VRR_NUC+TM+TM	Burkholderia ubonensis	Bacteria; Proteobacteria; Betaproteobacteria; Burkholderiales; Burkholderiaceae; Burkholderia; Burkholderia cepacia complex
NZ_LPDC01000029.1	1044	2309	WP_059961172.1	WK42_RS12560	GCF_001528645.1	VRR-NUC domain-containing protein	VRR_NUC+TM+TM	Burkholderia ubonensis	Bacteria; Proteobacteria; Betaproteobacteria; Burkholderiales; Burkholderiaceae; Burkholderia; Burkholderia cepacia complex
NZ_LPDC01000053.1	219754	220524	WP_059966421.1	WK42_RS26000	GCF_001528645.1	hypothetical protein	VRR_NUC	Burkholderia ubonensis	Bacteria; Proteobacteria; Betaproteobacteria; Burkholderiales; Burkholderiaceae; Burkholderia; Burkholderia cepacia complex
NZ_LPAT01000005.1	36385	37155	WP_059978413.1	WJ81_RS00875	GCF_001528145.1	hypothetical protein	VRR_NUC	Burkholderia ubonensis	Bacteria; Proteobacteria; Betaproteobacteria; Burkholderiales; Burkholderiaceae; Burkholderia; Burkholderia cepacia complex
NZ_LPBE01000009.1	36847	37614	WP_059989370.1	WJ91_RS01205	GCF_001527095.1	VRR-NUC domain-containing protein	VRR_NUC	Burkholderia ubonensis	Bacteria; Proteobacteria; Betaproteobacteria; Burkholderiales; Burkholderiaceae; Burkholderia; Burkholderia cepacia complex
NZ_LOZJ01000057.1	256940	257671	WP_059997237.1	WJ58_RS15570	GCF_001527465.1	VRR-NUC domain-containing protein	VRR_NUC	Burkholderia ubonensis	Bacteria; Proteobacteria; Betaproteobacteria; Burkholderiales; Burkholderiaceae; Burkholderia; Burkholderia cepacia complex
NZ_LOZK01000014.1	3653	4915	WP_060000586.1	WJ59_RS04535	GCF_001527485.1	VRR-NUC domain-containing protein	VRR_NUC+TM+TM	Burkholderia gladioli	Bacteria; Proteobacteria; Betaproteobacteria; Burkholderiales; Burkholderiaceae; Burkholderia
NZ_LPEL01000038.1	60699	61982	WP_060007802.1	WK77_RS14470	GCF_001529345.1	VRR-NUC domain-containing protein	VRR_NUC+TM+TM	Burkholderia ubonensis	Bacteria; Proteobacteria; Betaproteobacteria; Burkholderiales; Burkholderiaceae; Burkholderia; Burkholderia cepacia complex
NZ_LPCA01000051.1	30248	30982	WP_060021221.1	WK10_RS17850	GCF_001528285.1	VRR-NUC domain-containing protein	VRR_NUC	Burkholderia ubonensis	Bacteria; Proteobacteria; Betaproteobacteria; Burkholderiales; Burkholderiaceae; Burkholderia; Burkholderia cepacia complex
NZ_LPFD01000043.1	2285	3016	WP_060013612.1	WK94_RS12370	GCF_001529705.1	VRR-NUC domain-containing protein	VRR_NUC	Burkholderia ubonensis	Bacteria; Proteobacteria; Betaproteobacteria; Burkholderiales; Burkholderiaceae; Burkholderia; Burkholderia cepacia complex
NZ_LPEI01000028.1	19834	20604	WP_060031375.1	WK74_RS07180	GCF_001529205.1	VRR-NUC domain-containing protein	VRR_NUC	Burkholderia ubonensis	Bacteria; Proteobacteria; Betaproteobacteria; Burkholderiales; Burkholderiaceae; Burkholderia; Burkholderia cepacia complex
NZ_LPAD01000071.1	34926	35705	WP_060040292.1	WJ68_RS21480	GCF_001527865.1	hypothetical protein	VRR_NUC	Burkholderia ubonensis	Bacteria; Proteobacteria; Betaproteobacteria; Burkholderiales; Burkholderiaceae; Burkholderia; Burkholderia cepacia complex
NZ_LPCN01000046.1	96482	97246	WP_060043977.1	WK26_RS14315	GCF_001529585.1	VRR-NUC domain-containing protein	VRR_NUC	Burkholderia vietnamiensis	Bacteria; Proteobacteria; Betaproteobacteria; Burkholderiales; Burkholderiaceae; Burkholderia; Burkholderia cepacia complex
NZ_LPFG01000044.1	552118	553380	WP_060052668.1	WK97_RS30015	GCF_001529685.1	VRR-NUC domain-containing protein	VRR_NUC+TM+TM	Burkholderia cepacia	Bacteria; Proteobacteria; Betaproteobacteria; Burkholderiales; Burkholderiaceae; Burkholderia; Burkholderia cepacia complex
NZ_LPAJ01000117.1	136679	137941	WP_060058370.1	WJ74_RS25200	GCF_001527955.1	VRR-NUC domain-containing protein	VRR_NUC+TM+TM	Burkholderia ubonensis	Bacteria; Proteobacteria; Betaproteobacteria; Burkholderiales; Burkholderiaceae; Burkholderia; Burkholderia cepacia complex
NZ_LPCW01000028.1	749277	750560	WP_060061781.1	WK36_RS08920	GCF_001528675.1	VRR-NUC domain-containing protein	VRR_NUC+TM+TM	Burkholderia cepacia	Bacteria; Proteobacteria; Betaproteobacteria; Burkholderiales; Burkholderiaceae; Burkholderia; Burkholderia cepacia complex
NZ_LPDA01000029.1	5785	6525	WP_060074281.1	WK40_RS06340	GCF_001528685.1	VRR-NUC domain-containing protein	VRR_NUC	Burkholderia cepacia	Bacteria; Proteobacteria; Betaproteobacteria; Burkholderiales; Burkholderiaceae; Burkholderia; Burkholderia cepacia complex
NZ_LPDA01000068.1	400918	402183	WP_060071797.1	WK40_RS24685	GCF_001528685.1	VRR-NUC domain-containing protein	TM+TM+VRR_NUC+TM+TM	Burkholderia cepacia	Bacteria; Proteobacteria; Betaproteobacteria; Burkholderiales; Burkholderiaceae; Burkholderia; Burkholderia cepacia complex
NZ_LPED01000056.1	95673	96935	WP_060075696.1	WK69_RS16935	GCF_001529135.1	VRR-NUC domain-containing protein	VRR_NUC+TM+TM	Burkholderia ubonensis	Bacteria; Proteobacteria; Betaproteobacteria; Burkholderiales; Burkholderiaceae; Burkholderia; Burkholderia cepacia complex
NZ_LPCS01000094.1	23833	24597	WP_060081730.1	WK32_RS16785	GCF_001529645.1	VRR-NUC domain-containing protein	VRR_NUC	Burkholderia vietnamiensis	Bacteria; Proteobacteria; Betaproteobacteria; Burkholderiales; Burkholderiaceae; Burkholderia; Burkholderia cepacia complex
NZ_LPCS01000192.1	10780	12063	WP_060082529.1	WK32_RS34195	GCF_001529645.1	VRR-NUC domain-containing protein	VRR_NUC+TM+TM	Burkholderia vietnamiensis	Bacteria; Proteobacteria; Betaproteobacteria; Burkholderiales; Burkholderiaceae; Burkholderia; Burkholderia cepacia complex
NZ_LPEE01000047.1	188744	190000	WP_060084459.1	WK70_RS18620	GCF_001529145.1	VRR-NUC domain-containing protein	VRR_NUC+TM+TM	Burkholderia cepacia	Bacteria; Proteobacteria; Betaproteobacteria; Burkholderiales; Burkholderiaceae; Burkholderia; Burkholderia cepacia complex
NZ_LPEE01000058.1	526394	527677	WP_060085252.1	WK70_RS25670	GCF_001529145.1	VRR-NUC domain-containing protein	VRR_NUC+TM+TM	Burkholderia cepacia	Bacteria; Proteobacteria; Betaproteobacteria; Burkholderiales; Burkholderiaceae; Burkholderia; Burkholderia cepacia complex
NZ_LPEP01000001.1	364726	365991	WP_060089254.1	WK81_RS01480	GCF_001530335.1	VRR-NUC domain-containing protein	VRR_NUC+TM+TM	Burkholderia ubonensis	Bacteria; Proteobacteria; Betaproteobacteria; Burkholderiales; Burkholderiaceae; Burkholderia; Burkholderia cepacia complex
NZ_LPEP01000051.1	72027	72761	WP_060092174.1	WK81_RS22010	GCF_001530335.1	VRR-NUC domain-containing protein	VRR_NUC	Burkholderia ubonensis	Bacteria; Proteobacteria; Betaproteobacteria; Burkholderiales; Burkholderiaceae; Burkholderia; Burkholderia cepacia complex
NZ_LPEO01000084.1	109958	110725	WP_060099416.1	WK80_RS26225	GCF_001529925.1	VRR-NUC domain-containing protein	VRR_NUC	Burkholderia multivorans	Bacteria; Proteobacteria; Betaproteobacteria; Burkholderiales; Burkholderiaceae; Burkholderia; Burkholderia cepacia complex
NZ_LPFS01000009.1	78516	79265	WP_060108500.1	WL04_RS02850	GCF_001530685.1	VRR-NUC domain-containing protein	VRR_NUC	Burkholderia ubonensis	Bacteria; Proteobacteria; Betaproteobacteria; Burkholderiales; Burkholderiaceae; Burkholderia; Burkholderia cepacia complex
NZ_LPFO01000062.1	232833	234098	WP_060119747.1	WL02_RS20195	GCF_001530755.1	VRR-NUC domain-containing protein	VRR_NUC+TM+TM	Burkholderia ubonensis	Bacteria; Proteobacteria; Betaproteobacteria; Burkholderiales; Burkholderiaceae; Burkholderia; Burkholderia cepacia complex
NZ_LPFA01000055.1	78695	79459	WP_060129899.1	WK91_RS31230	GCF_001529525.1	VRR-NUC domain-containing protein	VRR_NUC	Burkholderia cepacia	Bacteria; Proteobacteria; Betaproteobacteria; Burkholderiales; Burkholderiaceae; Burkholderia; Burkholderia cepacia complex
NZ_LPDX01000090.1	98576	99841	WP_060133129.1	WK62_RS17890	GCF_001529845.1	VRR-NUC domain-containing protein	VRR_NUC+TM+TM	Burkholderia ubonensis	Bacteria; Proteobacteria; Betaproteobacteria; Burkholderiales; Burkholderiaceae; Burkholderia; Burkholderia cepacia complex
NZ_LPGV01000035.1	90394	91143	WP_060136163.1	WT39_RS16765	GCF_001530965.1	VRR-NUC domain-containing protein	VRR_NUC	Burkholderia territorii	Bacteria; Proteobacteria; Betaproteobacteria; Burkholderiales; Burkholderiaceae; Burkholderia; Burkholderia cepacia complex
NZ_LPDV01000081.1	138819	140084	WP_060141878.1	WK60_RS20070	GCF_001529035.1	VRR-NUC domain-containing protein	VRR_NUC+TM+TM	Burkholderia ubonensis	Bacteria; Proteobacteria; Betaproteobacteria; Burkholderiales; Burkholderiaceae; Burkholderia; Burkholderia cepacia complex
NZ_LPGN01000123.1	56343	57608	WP_060138854.1	WL22_RS25680	GCF_001530845.1	VRR-NUC domain-containing protein	VRR_NUC+TM+TM	Burkholderia ubonensis	Bacteria; Proteobacteria; Betaproteobacteria; Burkholderiales; Burkholderiaceae; Burkholderia; Burkholderia cepacia complex
NZ_LPEM01000058.1	489966	490718	WP_060158734.1	WK78_RS28960	GCF_001529885.1	hypothetical protein	VRR_NUC	Burkholderia cepacia	Bacteria; Proteobacteria; Betaproteobacteria; Burkholderiales; Burkholderiaceae; Burkholderia; Burkholderia cepacia complex
NZ_LPEC01000034.1	133553	134815	WP_060153731.1	WK68_RS07900	GCF_001530285.1	VRR-NUC domain-containing protein	VRR_NUC+TM+TM	Burkholderia ubonensis	Bacteria; Proteobacteria; Betaproteobacteria; Burkholderiales; Burkholderiaceae; Burkholderia; Burkholderia cepacia complex
NZ_LPEC01000159.1	67903	69168	WP_060156969.1	WK68_RS33730	GCF_001530285.1	VRR-NUC domain-containing protein	VRR_NUC+TM+TM	Burkholderia ubonensis	Bacteria; Proteobacteria; Betaproteobacteria; Burkholderiales; Burkholderiaceae; Burkholderia; Burkholderia cepacia complex
NZ_LPGW01000046.1	158503	159231	WP_060152068.1	WL27_RS17410	GCF_001530985.1	VRR-NUC domain-containing protein	VRR_NUC	Burkholderia multivorans	Bacteria; Proteobacteria; Betaproteobacteria; Burkholderiales; Burkholderiaceae; Burkholderia; Burkholderia cepacia complex
NZ_LPFE01000019.1	204835	205560	WP_060166390.1	WK95_RS09480	GCF_001530165.1	VRR-NUC domain-containing protein	VRR_NUC	Burkholderia ubonensis	Bacteria; Proteobacteria; Betaproteobacteria; Burkholderiales; Burkholderiaceae; Burkholderia; Burkholderia cepacia complex
NZ_LPGI01000106.1	98932	100194	WP_060162869.1	WL17_RS30935	GCF_001530745.1	VRR-NUC domain-containing protein	VRR_NUC+TM+TM	Burkholderia ubonensis	Bacteria; Proteobacteria; Betaproteobacteria; Burkholderiales; Burkholderiaceae; Burkholderia; Burkholderia cepacia complex
NZ_LPHK01000038.1	90434	91213	WP_060163944.1	WL36_RS07255	GCF_001531595.1	hypothetical protein		Burkholderia ubonensis	Bacteria; Proteobacteria; Betaproteobacteria; Burkholderiales; Burkholderiaceae; Burkholderia; Burkholderia cepacia complex
NZ_LPFE01000048.1	104136	105401	WP_060167350.1	WK95_RS19045	GCF_001530165.1	VRR-NUC domain-containing protein	VRR_NUC+TM+TM	Burkholderia ubonensis	Bacteria; Proteobacteria; Betaproteobacteria; Burkholderiales; Burkholderiaceae; Burkholderia; Burkholderia cepacia complex
NZ_LPFL01000057.1	4789	5553	WP_060170337.1	WL00_RS30485	GCF_001530185.1	VRR-NUC domain-containing protein	VRR_NUC	Burkholderia cepacia	Bacteria; Proteobacteria; Betaproteobacteria; Burkholderiales; Burkholderiaceae; Burkholderia; Burkholderia cepacia complex
NZ_LPGY01000045.1	101975	102715	WP_060176423.1	WT41_RS13210	GCF_001531005.1	VRR-NUC domain-containing protein	VRR_NUC	Burkholderia territorii	Bacteria; Proteobacteria; Betaproteobacteria; Burkholderiales; Burkholderiaceae; Burkholderia; Burkholderia cepacia complex
NZ_LPJZ01000010.1	283325	284092	WP_060181663.1	WL92_RS03865	GCF_001531955.1	VRR-NUC domain-containing protein	VRR_NUC	Burkholderia multivorans	Bacteria; Proteobacteria; Betaproteobacteria; Burkholderiales; Burkholderiaceae; Burkholderia; Burkholderia cepacia complex
NZ_LPAF01000006.1	52118	53380	WP_060195702.1	WJ70_RS01760	GCF_001528205.1	VRR-NUC domain-containing protein	VRR_NUC+TM+TM	Burkholderia ubonensis	Bacteria; Proteobacteria; Betaproteobacteria; Burkholderiales; Burkholderiaceae; Burkholderia; Burkholderia cepacia complex
NZ_LPIF01000054.1	397661	398923	WP_060232758.1	WL57_RS27700	GCF_001531905.1	VRR-NUC domain-containing protein	VRR_NUC+TM+TM	Burkholderia cepacia	Bacteria; Proteobacteria; Betaproteobacteria; Burkholderiales; Burkholderiaceae; Burkholderia; Burkholderia cepacia complex
NZ_LPIF01000059.1	126856	127596	WP_060233316.1	WL57_RS33190	GCF_001531905.1	VRR-NUC domain-containing protein	VRR_NUC	Burkholderia cepacia	Bacteria; Proteobacteria; Betaproteobacteria; Burkholderiales; Burkholderiaceae; Burkholderia; Burkholderia cepacia complex
NZ_LPLU01000008.1	80034	81299	WP_060231508.1	WM16_RS02230	GCF_001533725.1	VRR-NUC domain-containing protein	VRR_NUC+TM+TM	Burkholderia ubonensis	Bacteria; Proteobacteria; Betaproteobacteria; Burkholderiales; Burkholderiaceae; Burkholderia; Burkholderia cepacia complex
NZ_LPJP01000042.1	56779	58041	WP_060242546.1	WL83_RS10415	GCF_001533145.1	VRR-NUC domain-containing protein	VRR_NUC+TM+TM	Burkholderia ubonensis	Bacteria; Proteobacteria; Betaproteobacteria; Burkholderiales; Burkholderiaceae; Burkholderia; Burkholderia cepacia complex
NZ_LPLH01000019.1	59457	60206	WP_060246949.1	WM10_RS06115	GCF_001533535.1	VRR-NUC domain-containing protein	VRR_NUC	Burkholderia ubonensis	Bacteria; Proteobacteria; Betaproteobacteria; Burkholderiales; Burkholderiaceae; Burkholderia; Burkholderia cepacia complex
NZ_LPJW01000026.1	83642	84370	WP_060263513.1	WL89_RS06550	GCF_001533105.1	VRR-NUC domain-containing protein	VRR_NUC	Burkholderia cenocepacia	Bacteria; Proteobacteria; Betaproteobacteria; Burkholderiales; Burkholderiaceae; Burkholderia; Burkholderia cepacia complex
NZ_LPKH01000041.1	404430	405695	WP_060277142.1	WL99_RS14315	GCF_001532125.1	VRR-NUC domain-containing protein	TM+TM+VRR_NUC+TM+TM	Burkholderia cepacia	Bacteria; Proteobacteria; Betaproteobacteria; Burkholderiales; Burkholderiaceae; Burkholderia; Burkholderia cepacia complex
NZ_LPKX01000035.1	91996	92730	WP_060281459.1	WM04_RS13300	GCF_001533225.1	VRR-NUC domain-containing protein	VRR_NUC	Burkholderia ubonensis	Bacteria; Proteobacteria; Betaproteobacteria; Burkholderiales; Burkholderiaceae; Burkholderia; Burkholderia cepacia complex
NZ_LPJH01000056.1	109111	109878	WP_060303531.1	WL77_RS14990	GCF_001532785.1	VRR-NUC domain-containing protein	VRR_NUC	Burkholderia ubonensis	Bacteria; Proteobacteria; Betaproteobacteria; Burkholderiales; Burkholderiaceae; Burkholderia; Burkholderia cepacia complex
NZ_LPHG01000050.1	884795	886060	WP_060324766.1	WL32_RS29275	GCF_001531505.1	VRR-NUC domain-containing protein	VRR_NUC+TM+TM	Burkholderia cepacia	Bacteria; Proteobacteria; Betaproteobacteria; Burkholderiales; Burkholderiaceae; Burkholderia; Burkholderia cepacia complex
NZ_LPJL01000023.1	325211	326476	WP_060314830.1	WL80_RS08295	GCF_001532845.1	VRR-NUC domain-containing protein	VRR_NUC+TM+TM	Burkholderia ubonensis	Bacteria; Proteobacteria; Betaproteobacteria; Burkholderiales; Burkholderiaceae; Burkholderia; Burkholderia cepacia complex
NZ_LPIS01000038.1	86576	87328	WP_060329543.1	WL68_RS38040	GCF_001532525.1	hypothetical protein	VRR_NUC	Burkholderia cepacia	Bacteria; Proteobacteria; Betaproteobacteria; Burkholderiales; Burkholderiaceae; Burkholderia; Burkholderia cepacia complex
NZ_LPKB01000042.1	83337	84599	WP_060341981.1	WL94_RS11825	GCF_001532885.1	VRR-NUC domain-containing protein	VRR_NUC+TM+TM	Burkholderia cepacia	Bacteria; Proteobacteria; Betaproteobacteria; Burkholderiales; Burkholderiaceae; Burkholderia; Burkholderia cepacia complex
NZ_LPNB01000058.1	37298	38032	WP_060333255.1	WM32_RS21385	GCF_001534445.1	VRR-NUC domain-containing protein	VRR_NUC	Burkholderia ubonensis	Bacteria; Proteobacteria; Betaproteobacteria; Burkholderiales; Burkholderiaceae; Burkholderia; Burkholderia cepacia complex
NZ_LPKY01000030.1	2862	3545	WP_060350446.1	WT71_RS34820	GCF_001532995.1	VRR-NUC domain-containing protein	DUF4776+VRR_NUC	Burkholderia stagnalis	Bacteria; Proteobacteria; Betaproteobacteria; Burkholderiales; Burkholderiaceae; Burkholderia; Burkholderia cepacia complex
NZ_LPLE01000085.1	5570	6298	WP_060350487.1	WT75_RS28950	GCF_001533495.1	VRR-NUC domain-containing protein	VRR_NUC	Burkholderia stagnalis	Bacteria; Proteobacteria; Betaproteobacteria; Burkholderiales; Burkholderiaceae; Burkholderia; Burkholderia cepacia complex
NZ_CP013458.1	1437092	1437829	WP_060356651.1	WT60_RS26965	GCF_001532025.2	VRR-NUC domain-containing protein	VRR_NUC	Burkholderia sp. MSMB617WGS	Bacteria; Proteobacteria; Betaproteobacteria; Burkholderiales; Burkholderiaceae; Burkholderia; pseudomallei group
NZ_LPJK01000076.1	18090	18830	WP_060361757.1	WT54_RS27275	GCF_001533385.1	VRR-NUC domain-containing protein	VRR_NUC	Burkholderia territorii	Bacteria; Proteobacteria; Betaproteobacteria; Burkholderiales; Burkholderiaceae; Burkholderia; Burkholderia cepacia complex
NZ_LPNE01000069.1	329267	329998	WP_060401822.1	WM36_RS25930	GCF_001536885.1	VRR-NUC domain-containing protein	VRR_NUC	Burkholderia ubonensis	Bacteria; Proteobacteria; Betaproteobacteria; Burkholderiales; Burkholderiaceae; Burkholderia; Burkholderia cepacia complex
NZ_LNJQ01000001.1	1148518	1149273	WP_060821613.1	WS72_RS05205	GCF_001546915.1	VRR-NUC domain-containing protein	VRR_NUC	Burkholderia savannae	Bacteria; Proteobacteria; Betaproteobacteria; Burkholderiales; Burkholderiaceae; Burkholderia; pseudomallei group
NZ_LNJQ01000004.1	2322465	2323193	WP_060823045.1	WS72_RS29595	GCF_001546915.1	VRR-NUC domain-containing protein	VRR_NUC	Burkholderia savannae	Bacteria; Proteobacteria; Betaproteobacteria; Burkholderiales; Burkholderiaceae; Burkholderia; pseudomallei group
NZ_LNJR01000003.1	169263	170024	WP_060821030.1	WS73_RS22325	GCF_001546955.1	VRR-NUC domain-containing protein	VRR_NUC	Burkholderia savannae	Bacteria; Proteobacteria; Betaproteobacteria; Burkholderiales; Burkholderiaceae; Burkholderia; pseudomallei group
NZ_BCTO01000013.1	70553	71308	WP_061287422.1	DTS01S_RS05660	GCF_001571325.1	hypothetical protein		Delftia tsuruhatensis NBRC 16741	Bacteria; Proteobacteria; Betaproteobacteria; Burkholderiales; Comamonadaceae; Delftia
NZ_LOOY01000042.1	24207	25496	WP_061356757.1	AUQ12_RS24715	GCF_001576035.1	VRR-NUC domain-containing protein	VRR_NUC+TM+TM	Escherichia coli	Bacteria; Proteobacteria; Gammaproteobacteria; Enterobacterales; Enterobacteriaceae; Escherichia
NZ_CP014158.1	3392774	3393475	WP_061561727.1	PcP3B5_RS14980	GCF_001586155.1	VRR-NUC domain-containing protein	VRR_NUC+TM	Pseudomonas citronellolis	Bacteria; Proteobacteria; Gammaproteobacteria; Pseudomonadales; Pseudomonadaceae; Pseudomonas
NZ_JEMA01000685.1	4310	6997	WP_061610105.1	BE15_RS27845	GCF_001589285.1	type VI secretion system tip protein VgrG	Phage_GPD+Phage_base_V+VRR_NUC	Sorangium cellulosum	Bacteria; Proteobacteria; Deltaproteobacteria; Myxococcales; Sorangiineae; Polyangiaceae; Sorangium
NZ_LASA01000057.1	62489	63289	WP_062263054.1	WG89_RS06480	GCF_001562015.1	VRR-NUC domain-containing protein	VRR_NUC	Endozoicomonas arenosclerae	Bacteria; Proteobacteria; Gammaproteobacteria; Oceanospirillales; Endozoicomonadaceae; Endozoicomonas
NZ_LMNZ01000002.1	168172	168849	WP_062585931.1	ASF69_RS04935	GCF_001423445.1	hypothetical protein		Rhizobium sp. Leaf311	Bacteria; Proteobacteria; Alphaproteobacteria; Hyphomicrobiales; Rhizobiaceae; Rhizobium/Agrobacterium group; Rhizobium
NZ_CP015033.1	514648	515376	WP_062884149.1	A2T82_RS03320	GCF_001606115.1	VRR-NUC domain-containing protein	VRR_NUC	Burkholderia cenocepacia	Bacteria; Proteobacteria; Betaproteobacteria; Burkholderiales; Burkholderiaceae; Burkholderia; Burkholderia cepacia complex
NZ_LQQM01000006.1	320235	321536	WP_063264551.1	AVZ29_RS04705	GCF_001619915.1	VRR-NUC domain-containing protein	VRR_NUC+TM+TM	Cronobacter sakazakii	Bacteria; Proteobacteria; Gammaproteobacteria; Enterobacterales; Enterobacteriaceae; Cronobacter
NZ_LWCN01000004.1	3421760	3422515	WP_063327600.1	A4F85_RS20615	GCF_001622915.1	hypothetical protein	VRR_NUC	Delftia sp. GW456-R20	Bacteria; Proteobacteria; Betaproteobacteria; Burkholderiales; Comamonadaceae; Delftia
NZ_LVUK01000079.1	558	1841	WP_063417648.1	A3465_RS06150	GCF_001631035.1	VRR-NUC domain-containing protein	VRR_NUC+TM+TM	Enterobacter roggenkampii	Bacteria; Proteobacteria; Gammaproteobacteria; Enterobacterales; Enterobacteriaceae; Enterobacter; Enterobacter cloacae complex
NZ_LVTP01000096.1	29742	31019	WP_063453453.1	A3460_RS16060	GCF_001631695.1	VRR-NUC domain-containing protein	VRR_NUC+TM+TM	Enterobacter roggenkampii	Bacteria; Proteobacteria; Gammaproteobacteria; Enterobacterales; Enterobacteriaceae; Enterobacter; Enterobacter cloacae complex
NZ_LNJT01000006.1	455724	456989	WP_063533054.1	WT16_RS04440	GCF_001636105.1	VRR-NUC domain-containing protein	VRR_NUC+TM+TM	Burkholderia sp. MSMB1589WGS	Bacteria; Proteobacteria; Betaproteobacteria; Burkholderiales; Burkholderiaceae; Burkholderia; pseudomallei group
NZ_LOVB01000046.1	19002	20081	WP_063888296.1	WI74_RS09335	GCF_001523225.1	DUF4150 domain-containing protein	Tox-PAAR-like+TM	Burkholderia ubonensis	Bacteria; Proteobacteria; Betaproteobacteria; Burkholderiales; Burkholderiaceae; Burkholderia; Burkholderia cepacia complex
NZ_LOXR01000102.1	186199	187278	WP_063888261.1	WJ36_RS30085	GCF_001524545.1	DUF4150 domain-containing protein	Tox-PAAR-like+TM	Burkholderia ubonensis	Bacteria; Proteobacteria; Betaproteobacteria; Burkholderiales; Burkholderiaceae; Burkholderia; Burkholderia cepacia complex
NZ_LOZL01000024.1	15258	16337	WP_063895454.1	WJ60_RS03995	GCF_001527505.1	DUF4150 domain-containing protein	Tox-PAAR-like+TM	Burkholderia ubonensis	Bacteria; Proteobacteria; Betaproteobacteria; Burkholderiales; Burkholderiaceae; Burkholderia; Burkholderia cepacia complex
NZ_LPCD01000019.1	90763	91842	WP_063899052.1	WK13_RS03550	GCF_001528345.1	DUF4150 domain-containing protein	Tox-PAAR-like+TM	Burkholderia ubonensis	Bacteria; Proteobacteria; Betaproteobacteria; Burkholderiales; Burkholderiaceae; Burkholderia; Burkholderia cepacia complex
NZ_LPGI01000097.1	45453	46532	WP_063901536.1	WL17_RS27400	GCF_001530745.1	DUF4150 domain-containing protein	Tox-PAAR-like+TM	Burkholderia ubonensis	Bacteria; Proteobacteria; Betaproteobacteria; Burkholderiales; Burkholderiaceae; Burkholderia; Burkholderia cepacia complex
NZ_LPHW01000268.1	32335	33414	WP_063902117.1	WL48_RS27080	GCF_001531785.1	DUF4150 domain-containing protein	Tox-PAAR-like+TM	Burkholderia ubonensis	Bacteria; Proteobacteria; Betaproteobacteria; Burkholderiales; Burkholderiaceae; Burkholderia; Burkholderia cepacia complex
NZ_LOVC01000062.1	245070	246149	WP_063905797.1	WI75_RS17735	GCF_001523245.1	DUF4150 domain-containing protein	Tox-PAAR-like+TM	Burkholderia ubonensis	Bacteria; Proteobacteria; Betaproteobacteria; Burkholderiales; Burkholderiaceae; Burkholderia; Burkholderia cepacia complex
NZ_LPLS01000037.1	21790	22869	WP_063904876.1	WM15_RS07100	GCF_001533685.1	DUF4150 domain-containing protein	Tox-PAAR-like+TM	Burkholderia ubonensis	Bacteria; Proteobacteria; Betaproteobacteria; Burkholderiales; Burkholderiaceae; Burkholderia; Burkholderia cepacia complex
NZ_LPGJ01000045.1	50822	51901	WP_063902745.1	WL18_RS09310	GCF_001536865.1	DUF4150 domain-containing protein	Tox-PAAR-like+TM	Burkholderia ubonensis	Bacteria; Proteobacteria; Betaproteobacteria; Burkholderiales; Burkholderiaceae; Burkholderia; Burkholderia cepacia complex
NZ_PXUF01000033.1	17348	18655	WP_064378520.1	C6400_RS27925	GCF_003011775.1	VRR-NUC domain-containing protein	VRR_NUC	Klebsiella michiganensis	Bacteria; Proteobacteria; Gammaproteobacteria; Enterobacterales; Enterobacteriaceae; Klebsiella
NZ_LXEO01000043.1	1075	2364	WP_064555267.1	M979_RS13710	GCF_001654865.1	VRR-NUC domain-containing protein	VRR_NUC+TM+TM	Buttiauxella noackiae ATCC 51607	Bacteria; Proteobacteria; Gammaproteobacteria; Enterobacterales; Enterobacteriaceae; Buttiauxella
NZ_LXGI01000075.1	211896	213158	WP_065060880.1	A6456_RS19240	GCF_001673675.1	VRR-NUC domain-containing protein	VRR_NUC+TM+TM	Paraburkholderia tropica	Bacteria; Proteobacteria; Betaproteobacteria; Burkholderiales; Burkholderiaceae; Paraburkholderia
NZ_LYUO01000017.1	25419	26144	WP_065088325.1	A9K81_RS14060	GCF_001675375.1	VRR-NUC domain-containing protein	VRR_NUC	Pseudomonas syringae pv. syringae	Bacteria; Proteobacteria; Gammaproteobacteria; Pseudomonadales; Pseudomonadaceae; Pseudomonas; Pseudomonas syringae
NZ_LFJT01000097.1	10074	10829	WP_065348076.1	ACM14_RS29095	GCF_001682645.1	hypothetical protein		Delftia sp. JD2	Bacteria; Proteobacteria; Betaproteobacteria; Burkholderiales; Comamonadaceae; Delftia
NZ_LT222319.1	892417	893142	WP_065349071.1	PCPL58_RS06515	GCF_900074915.1	VRR-NUC domain-containing protein	VRR_NUC	Pseudomonas cerasi	Bacteria; Proteobacteria; Gammaproteobacteria; Pseudomonadales; Pseudomonadaceae; Pseudomonas
NZ_LOIC01000034.1	105118	106476	WP_065389725.1	Phpb_RS06975	GCF_001684335.1	VRR-NUC domain-containing protein	VRR_NUC+TM+TM	Photorhabdus namnaonensis	Bacteria; Proteobacteria; Gammaproteobacteria; Enterobacterales; Morganellaceae; Photorhabdus
NZ_LOIC01000055.1	18646	20004	WP_065390188.1	Phpb_RS09860	GCF_001684335.1	VRR-NUC domain-containing protein	VRR_NUC+TM+TM	Photorhabdus namnaonensis	Bacteria; Proteobacteria; Gammaproteobacteria; Enterobacterales; Morganellaceae; Photorhabdus
NZ_LOIC01000070.1	28235	29596	WP_065390507.1	Phpb_RS11805	GCF_001684335.1	VRR-NUC domain-containing protein	VRR_NUC+TM+TM	Photorhabdus namnaonensis	Bacteria; Proteobacteria; Gammaproteobacteria; Enterobacterales; Morganellaceae; Photorhabdus
NZ_LOIC01000078.1	37406	38764	WP_065391177.1	Phpb_RS15630	GCF_001684335.1	VRR-NUC domain-containing protein	VRR_NUC+TM+TM	Photorhabdus namnaonensis	Bacteria; Proteobacteria; Gammaproteobacteria; Enterobacterales; Morganellaceae; Photorhabdus
NZ_LZGJ01000023.1	135088	136665	WP_065602301.1	A9G14_RS04530	GCF_001690735.1	VRR-NUC domain-containing protein	VRR_NUC	Gilliamella apicola	Bacteria; Proteobacteria; Gammaproteobacteria; Orbales; Orbaceae; Gilliamella
NZ_MAYQ01000006.1	1581506	1582654	WP_065615965.1	BBA88_RS11300	GCF_001691585.1	VRR-NUC domain-containing protein	VRR_NUC	Pseudomonas moraviensis	Bacteria; Proteobacteria; Gammaproteobacteria; Pseudomonadales; Pseudomonadaceae; Pseudomonas
NZ_LXKR01000028.1	213619	214950	WP_065684805.1	A6U95_RS11470	GCF_001692375.1	VRR-NUC domain-containing protein	VRR_NUC+TM+TM	Serratia sp. 14-2641	Bacteria; Proteobacteria; Gammaproteobacteria; Enterobacterales; Yersiniaceae; Serratia; unclassified Serratia
NZ_LXKY01000007.1	13287	14408	WP_065661982.1	A6U97_RS13475	GCF_001692425.1	DUF4150 domain-containing protein	Tox-PAAR-like	Agrobacterium tumefaciens	Bacteria; Proteobacteria; Alphaproteobacteria; Hyphomicrobiales; Rhizobiaceae; Rhizobium/Agrobacterium group; Agrobacterium; Agrobacterium tumefaciens complex
NZ_LXKU01000028.1	21765	22901	WP_065701045.1	A6U92_RS22130	GCF_001692345.1	DUF4150 domain-containing protein	Tox-PAAR-like	Agrobacterium rubi	Bacteria; Proteobacteria; Alphaproteobacteria; Hyphomicrobiales; Rhizobiaceae; Rhizobium/Agrobacterium group; Agrobacterium
NZ_LXKR01000040.1	11310	12647	WP_065684980.1	A6U95_RS14705	GCF_001692375.1	VRR-NUC domain-containing protein	VRR_NUC+TM+TM	Serratia sp. 14-2641	Bacteria; Proteobacteria; Gammaproteobacteria; Enterobacterales; Yersiniaceae; Serratia; unclassified Serratia
NZ_LOMY01000087.1	37540	38895	WP_065823379.1	Ppb6_RS11775	GCF_001696805.1	VRR-NUC domain-containing protein	VRR_NUC+TM+TM	Photorhabdus australis subsp. thailandensis	Bacteria; Proteobacteria; Gammaproteobacteria; Enterobacterales; Morganellaceae; Photorhabdus
NZ_SGFD01000012.1	107455	108333	WP_065933529.1	EUX53_RS11465	GCF_004210185.1	VRR-NUC domain protein	T2SSF+VRR_NUC	Pseudomonas orientalis	Bacteria; Proteobacteria; Gammaproteobacteria; Pseudomonadales; Pseudomonadaceae; Pseudomonas
NZ_JACAQV010000016.1	63674	64552	WP_065911403.1	HX810_RS17835	GCF_013386885.1	VRR-NUC domain-containing protein	VRR_NUC	Pseudomonas salomonii	Bacteria; Proteobacteria; Gammaproteobacteria; Pseudomonadales; Pseudomonadaceae; Pseudomonas
NZ_CVTS01000058.1	26942	27643	WP_065943942.1	BFQ03_RS20935	GCF_900004755.1	VRR-NUC domain-containing protein	VRR_NUC+TM	Pseudomonas sp. 25 R 14	Bacteria; Proteobacteria; Gammaproteobacteria; Pseudomonadales; Pseudomonadaceae; Pseudomonas
NZ_LOVS01000050.1	95171	96430	WP_066569334.1	WS62_RS06865	GCF_001523835.1	VRR-NUC domain-containing protein	VRR_NUC+TM+TM	Burkholderia sp. ABCPW 14	Bacteria; Proteobacteria; Betaproteobacteria; Burkholderiales; Burkholderiaceae; Burkholderia; pseudomallei group
NZ_LOVS01000055.1	181746	183011	WP_066570025.1	WS62_RS08280	GCF_001523835.1	VRR-NUC domain-containing protein	VRR_NUC+TM+TM	Burkholderia sp. ABCPW 14	Bacteria; Proteobacteria; Betaproteobacteria; Burkholderiales; Burkholderiaceae; Burkholderia; pseudomallei group
NZ_LOVS01000160.1	5321	6604	WP_066577037.1	WS62_RS25960	GCF_001523835.1	VRR-NUC domain-containing protein	VRR_NUC+TM+TM	Burkholderia sp. ABCPW 14	Bacteria; Proteobacteria; Betaproteobacteria; Burkholderiales; Burkholderiaceae; Burkholderia; pseudomallei group
NZ_CP015110.1	1504498	1505235	WP_067658230.1	AMD27_RS07045	GCF_001612555.1	VRR-NUC domain-containing protein	VRR_NUC	Acinetobacter sp. TGL-Y2	Bacteria; Proteobacteria; Gammaproteobacteria; Moraxellales; Moraxellaceae; Acinetobacter
NZ_LZEX01000018.1	3015	4487	WP_067423874.1	AYY17_RS11610	GCF_001676055.1	VRR-NUC domain-containing protein	VRR_NUC+TM+TM+TM	Morganella psychrotolerans	Bacteria; Proteobacteria; Gammaproteobacteria; Enterobacterales; Morganellaceae; Morganella
NZ_MDIJ01000088.1	4392	5390	WP_069036762.1	BFR91_RS12445	GCF_001713675.1	hypothetical protein	RE_Bpu10I+VRR_NUC	Acinetobacter pittii	Bacteria; Proteobacteria; Gammaproteobacteria; Moraxellales; Moraxellaceae; Acinetobacter; Acinetobacter calcoaceticus/baumannii complex
NZ_CP013406.1	1602704	1603966	WP_069251547.1	WJ23_RS29190	GCF_001718575.1	VRR-NUC domain-containing protein	VRR_NUC+TM+TM	Burkholderia lata	Bacteria; Proteobacteria; Betaproteobacteria; Burkholderiales; Burkholderiaceae; Burkholderia; Burkholderia cepacia complex
NZ_CP013376.1	1677571	1678845	WP_069255169.1	WI67_RS24220	GCF_001718395.1	VRR-NUC domain-containing protein	VRR_NUC+TM+TM	Burkholderia cepacia	Bacteria; Proteobacteria; Betaproteobacteria; Burkholderiales; Burkholderiaceae; Burkholderia; Burkholderia cepacia complex
NZ_CP013443.1	954862	956127	WP_069269947.1	WT26_RS07795	GCF_001718835.1	VRR-NUC domain-containing protein	VRR_NUC+TM+TM	Burkholderia cepacia	Bacteria; Proteobacteria; Betaproteobacteria; Burkholderiales; Burkholderiaceae; Burkholderia; Burkholderia cepacia complex
NZ_CP013443.1	2348923	2349654	WP_069270304.1	WT26_RS14135	GCF_001718835.1	VRR-NUC domain-containing protein	VRR_NUC	Burkholderia cepacia	Bacteria; Proteobacteria; Betaproteobacteria; Burkholderiales; Burkholderiaceae; Burkholderia; Burkholderia cepacia complex
NZ_CP013444.1	1759660	1760922	WP_069271871.1	WT26_RS27910	GCF_001718835.1	VRR-NUC domain-containing protein	VRR_NUC+TM+TM	Burkholderia cepacia	Bacteria; Proteobacteria; Betaproteobacteria; Burkholderiales; Burkholderiaceae; Burkholderia; Burkholderia cepacia complex
NZ_MDWA01000013.1	91808	92581	WP_069353427.1	BEP16_RS16275	GCF_001720525.1	VRR-NUC domain-containing protein	VRR_NUC	Burkholderia cenocepacia	Bacteria; Proteobacteria; Betaproteobacteria; Burkholderiales; Burkholderiaceae; Burkholderia; Burkholderia cepacia complex
NZ_LXJQ01000016.1	11003	11710	WP_069564834.1	A7D27_RS10520	GCF_001728925.1	VRR-NUC domain-containing protein	VRR_NUC	Pseudomonas sp. 1D4	Bacteria; Proteobacteria; Gammaproteobacteria; Pseudomonadales; Pseudomonadaceae; Pseudomonas
NZ_LXJQ01000107.1	602	1834	WP_069566658.1	A7D27_RS26670	GCF_001728925.1	VRR-NUC domain-containing protein	VRR_NUC+TM+TM	Pseudomonas sp. 1D4	Bacteria; Proteobacteria; Gammaproteobacteria; Pseudomonadales; Pseudomonadaceae; Pseudomonas
NZ_CP017184.1	4111692	4112975	WP_069598812.1	BFV67_RS19210	GCF_001729805.1	VRR-NUC domain-containing protein	VRR_NUC+TM+TM	Enterobacter roggenkampii	Bacteria; Proteobacteria; Gammaproteobacteria; Enterobacterales; Enterobacteriaceae; Enterobacter; Enterobacter cloacae complex
NZ_LUJJ01000040.1	110884	111933	WP_070063931.1	BJU09_RS29720	GCF_001752345.1	hypothetical protein		Variovorax boronicumulans	Bacteria; Proteobacteria; Betaproteobacteria; Burkholderiales; Comamonadaceae; Variovorax
NZ_CP017420.1	6468975	6469730	WP_070080924.1	BI380_RS29535	GCF_001753225.1	hypothetical protein		Delftia tsuruhatensis	Bacteria; Proteobacteria; Betaproteobacteria; Burkholderiales; Comamonadaceae; Delftia
NZ_MKKJ01000012.1	161739	162467	WP_070075731.1	BJD20_RS10445	GCF_001753605.1	VRR-NUC domain-containing protein	VRR_NUC+TM	Acinetobacter proteolyticus	Bacteria; Proteobacteria; Gammaproteobacteria; Pseudomonadales; Moraxellaceae; Acinetobacter
NZ_MKGK01000008.1	93373	94101	WP_070108375.1	BKD20_RS30470	GCF_001755835.1	VRR-NUC domain-containing protein	VRR_NUC	Burkholderia plantarii	Bacteria; Proteobacteria; Betaproteobacteria; Burkholderiales; Burkholderiaceae; Burkholderia
NZ_MBEV02000001.1	541402	542412	WP_070166519.1	BBI04_RS02415	GCF_001758275.2	DUF4150 domain-containing protein	Tox-PAAR-like+DUF883_C	Agrobacterium vitis	Bacteria; Proteobacteria; Alphaproteobacteria; Hyphomicrobiales; Rhizobiaceae; Rhizobium/Agrobacterium group; Agrobacterium
NZ_KV794871.1	348	1931	WP_070495406.1	HMPREF2572_RS00615	GCF_001808875.1	hypothetical protein	TM	Neisseria sp. HMSC064E01	Bacteria; Proteobacteria; Betaproteobacteria; Neisseriales; Neisseriaceae; Neisseria; unclassified Neisseria
NZ_CP017668.1	3355884	3357119	WP_070531186.1	BJP62_RS15900	GCF_001808185.1	VRR-NUC domain-containing protein	VRR_NUC+TM+TM	Jeongeupia sp. USM3	Bacteria; Proteobacteria; Betaproteobacteria; Neisseriales; Chromobacteriaceae; Jeongeupia; unclassified Jeongeupia
NZ_KV786772.1	19151	19915	WP_070555453.1	HMPREF3115_RS17830	GCF_001806955.1	nuclease	VRR_NUC	Burkholderia sp. HMSC10F09	Bacteria; Proteobacteria; Betaproteobacteria; Burkholderiales; Burkholderiaceae; Burkholderia
NZ_KV799995.1	757	1881	WP_070591728.1	HMPREF2700_RS09460	GCF_001810105.1	VRR-NUC domain-containing protein	VRR_NUC+TM+TM	Neisseria sp. HMSC068C04	Bacteria; Proteobacteria; Betaproteobacteria; Neisseriales; Neisseriaceae; Neisseria; unclassified Neisseria
NZ_KV832194.1	492636	494117	WP_070837961.1	HMPREF2551_RS06490	GCF_001837375.1	hypothetical protein	VRR_NUC+TM+TM	Neisseria sp. HMSC066H01	Bacteria; Proteobacteria; Betaproteobacteria; Neisseriales; Neisseriaceae; Neisseria; unclassified Neisseria
NZ_MBJU01000014.1	46782	48146	WP_070974590.1	BB987_RS01955	GCF_001854735.1	VRR-NUC domain-containing protein	VRR_NUC+TM+TM	Photorhabdus temperata	Bacteria; Proteobacteria; Gammaproteobacteria; Enterobacterales; Morganellaceae; Photorhabdus
NZ_MBJU01000065.1	1053	2408	WP_070974668.1	BB987_RS05480	GCF_001854735.1	VRR-NUC domain-containing protein	VRR_NUC+TM+TM	Photorhabdus temperata	Bacteria; Proteobacteria; Gammaproteobacteria; Enterobacterales; Morganellaceae; Photorhabdus
NZ_CP017754.1	2015575	2016315	WP_071069072.1	BKK80_RS08915	GCF_001854325.1	VRR-NUC domain-containing protein	VRR_NUC	Cupriavidus malaysiensis	Bacteria; Proteobacteria; Betaproteobacteria; Burkholderiales; Burkholderiaceae; Cupriavidus
NZ_CP033727.1	2685380	2686663	WP_071432018.1	EFZ10_RS13030	GCF_009762255.1	VRR-NUC domain-containing protein	VRR_NUC+TM+TM	Tatumella sp. TA1	Bacteria; Proteobacteria; Gammaproteobacteria; Enterobacterales; Erwiniaceae; Tatumella; unclassified Tatumella
NZ_MEAZ01000345.1	5074	5841	WP_071765205.1	BGV71_RS33495	GCF_001882705.1	VRR-NUC domain-containing protein	VRR_NUC	Burkholderia ubonensis	Bacteria; Proteobacteria; Betaproteobacteria; Burkholderiales; Burkholderiaceae; Burkholderia; Burkholderia cepacia complex
NZ_MEBD01000177.1	13146	14411	WP_071756670.1	BGV50_RS29580	GCF_001882785.1	VRR-NUC domain-containing protein	VRR_NUC+TM+TM	Burkholderia ubonensis	Bacteria; Proteobacteria; Betaproteobacteria; Burkholderiales; Burkholderiaceae; Burkholderia; Burkholderia cepacia complex
NZ_MEAX01000011.1	61410	62675	WP_071773686.1	BGV69_RS09395	GCF_001882635.1	VRR-NUC domain-containing protein	TM+TM	Burkholderia ubonensis	Bacteria; Proteobacteria; Betaproteobacteria; Burkholderiales; Burkholderiaceae; Burkholderia; Burkholderia cepacia complex
NZ_RBOI01000050.1	362188	362913	WP_072365401.1	ALQ78_RS14475	GCF_003699535.1	VRR-NUC domain-containing protein	VRR_NUC	Pseudomonas syringae pv. aptata	Bacteria; Proteobacteria; Gammaproteobacteria; Pseudomonadales; Pseudomonadaceae; Pseudomonas; Pseudomonas syringae
NZ_QJJY01000020.1	3796	4536	WP_072442916.1	NA66_RS27835	GCF_003201755.1	VRR-NUC domain-containing protein	VRR_NUC	Burkholderia pyrrocinia	Bacteria; Proteobacteria; Betaproteobacteria; Burkholderiales; Burkholderiaceae; Burkholderia; Burkholderia cepacia complex
NZ_FRBZ01000002.1	157396	158892	WP_072869107.1	BUA66_RS04470	GCF_900142745.1	VRR-NUC domain-containing protein	VRR_NUC+TM+TM	Morganella morganii	Bacteria; Proteobacteria; Gammaproteobacteria; Enterobacterales; Morganellaceae; Morganella
NZ_FQUH01000007.1	118683	119528	WP_072958199.1	BUA91_RS08885	GCF_900129185.1	VRR-NUC domain-containing protein	VRR_NUC	Vibrio gazogenes DSM 21264 = NBRC 103151	Bacteria; Proteobacteria; Gammaproteobacteria; Vibrionales; Vibrionaceae; Vibrio
NZ_FRAB01000015.1	6579	7325	WP_073429461.1	BUE39_RS15010	GCF_900142195.1	VRR-NUC domain-containing protein	VRR_NUC	Paraburkholderia terricola	Bacteria; Proteobacteria; Betaproteobacteria; Burkholderiales; Burkholderiaceae; Paraburkholderia
NZ_FRAB01000097.1	1004	2248	WP_073432970.1	BUE39_RS33550	GCF_900142195.1	VRR-NUC domain-containing protein	VRR_NUC+TM+TM	Paraburkholderia terricola	Bacteria; Proteobacteria; Betaproteobacteria; Burkholderiales; Burkholderiaceae; Paraburkholderia
NZ_FRFG01000012.1	66510	67367	WP_073580110.1	VQ7734_RS04705	GCF_900143745.1	VRR-NUC domain-containing protein	VRR_NUC	Vibrio quintilis	Bacteria; Proteobacteria; Gammaproteobacteria; Vibrionales; Vibrionaceae; Vibrio
NZ_JADLJB010000020.1	88313	89020	WP_073649495.1	IRW40_RS23890	GCF_015680725.1	VRR-NUC domain-containing protein	VRR_NUC	Pseudomonas aeruginosa	Bacteria; Proteobacteria; Gammaproteobacteria; Pseudomonadales; Pseudomonadaceae; Pseudomonas
NZ_MQRH01000015.1	84996	86333	WP_074030974.1	BSQ40_RS17210	GCF_001908045.1	VRR-NUC domain-containing protein	VRR_NUC+TM+TM	Serratia fonticola	Bacteria; Proteobacteria; Gammaproteobacteria; Enterobacterales; Yersiniaceae; Serratia
NZ_NSXW01000019.1	33277	33978	WP_074234596.1	IPC345_RS26135	GCF_003839305.1	VRR-NUC domain-containing protein	VRR_NUC+TM	Pseudomonas aeruginosa	Bacteria; Proteobacteria; Gammaproteobacteria; Pseudomonadales; Pseudomonadaceae; Pseudomonas
NZ_FSRU01000002.1	3128155	3129468	WP_074301165.1	BUS12_RS31075	GCF_900142845.1	VRR-NUC domain-containing protein	VRR_NUC+TM+TM+TM	Paraburkholderia phenazinium	Bacteria; Proteobacteria; Betaproteobacteria; Burkholderiales; Burkholderiaceae; Paraburkholderia
NZ_FMWJ01000002.1	1	1236	WP_074524820.1	BLP72_RS02125	GCF_900102985.1	VRR-NUC domain-containing protein	VRR_NUC+TM+TM	Photorhabdus luminescens	Bacteria; Proteobacteria; Gammaproteobacteria; Enterobacterales; Morganellaceae; Photorhabdus
NZ_FMWJ01000063.1	1	1128	WP_074525129.1	BLP72_RS23200	GCF_900102985.1	VRR-NUC domain-containing protein	VRR_NUC+TM+TM	Photorhabdus luminescens	Bacteria; Proteobacteria; Gammaproteobacteria; Enterobacterales; Morganellaceae; Photorhabdus
NZ_NEJA01000007.1	458376	459254	WP_074688139.1	CAF80_RS23745	GCF_002112915.1	VRR-NUC domain-containing protein	VRR_NUC	Pseudomonas sp. B34(2017)	Bacteria; Proteobacteria; Gammaproteobacteria; Pseudomonadales; Pseudomonadaceae; Pseudomonas
NZ_FNPE01000002.1	234053	234808	WP_074921017.1	BLV89_RS04075	GCF_900107225.1	hypothetical protein		Delftia lacustris	Bacteria; Proteobacteria; Betaproteobacteria; Burkholderiales; Comamonadaceae; Delftia
NZ_FNPE01000045.1	2927	3682	WP_074924288.1	BLV89_RS31770	GCF_900107225.1	hypothetical protein		Delftia lacustris	Bacteria; Proteobacteria; Betaproteobacteria; Burkholderiales; Comamonadaceae; Delftia
NZ_BCZY01000018.1	33554	34255	WP_074979181.1	PC2_RS09880	GCF_002091555.1	VRR-NUC domain-containing protein	VRR_NUC+TM	Pseudomonas citronellolis NBRC 103043	Bacteria; Proteobacteria; Gammaproteobacteria; Pseudomonadales; Pseudomonadaceae; Pseudomonas
NZ_JXFE01000131.1	159	854	WP_075243478.1	DXO216_RS10635	GCF_001927875.1	VRR-NUC domain-containing protein	VRR_NUC	Xanthomonas oryzae pv. oryzae	Bacteria; Proteobacteria; Gammaproteobacteria; Xanthomonadales; Xanthomonadaceae; Xanthomonas
NZ_MKIM01000025.1	7626	8594	WP_075638954.1	BJF95_RS07980	GCF_001939045.1	DUF4150 domain-containing protein	Tox-PAAR-like	Rhizobium oryziradicis	Bacteria; Proteobacteria; Alphaproteobacteria; Hyphomicrobiales; Rhizobiaceae; Rhizobium/Agrobacterium group; Rhizobium
NZ_CP016162.1	2566357	2567031	WP_075747543.1	UYA_RS11950	GCF_001941865.1	VRR-NUC domain-containing protein	VRR_NUC	Pseudomonas alcaliphila JAB1	Bacteria; Proteobacteria; Gammaproteobacteria; Pseudomonadales; Pseudomonadaceae; Pseudomonas
NZ_BDLJ01000017.1	2984	4273	WP_075825973.1	BWO72_RS07430	GCF_001950715.1	VRR-NUC domain-containing protein	VRR_NUC+TM+TM	Escherichia coli	Bacteria; Proteobacteria; Gammaproteobacteria; Enterobacterales; Enterobacteriaceae; Escherichia
NZ_CP016896.1	1061532	1062530	WP_076032477.1	BEN76_RS05215	GCF_001953195.1	hypothetical protein	RE_Bpu10I	Acinetobacter soli	Bacteria; Proteobacteria; Gammaproteobacteria; Moraxellales; Moraxellaceae; Acinetobacter
NZ_MTJZ01000008.1	62988	63692	WP_076475386.1	BW685_RS07475	GCF_001957105.1	VRR-NUC domain-containing protein	VRR_NUC	Burkholderia ubonensis	Bacteria; Proteobacteria; Betaproteobacteria; Burkholderiales; Burkholderiaceae; Burkholderia; Burkholderia cepacia complex
NZ_QAXT01000017.1	20303	20605	WP_076486464.1	C8J27_RS17950	GCF_003053525.1	hypothetical protein		Rhodobacter aestuarii	Bacteria; Proteobacteria; Alphaproteobacteria; Rhodobacterales; Rhodobacteraceae; Rhodobacter
NZ_FTNW01000004.1	528868	530166	WP_076581853.1	BW984_RS13305	GCF_900156545.1	VRR-NUC domain-containing protein	VRR_NUC+TM+TM+TM	Pseudomonas alcaligenes	Bacteria; Proteobacteria; Gammaproteobacteria; Pseudomonadales; Pseudomonadaceae; Pseudomonas
NZ_LACA01000034.1	51659	53041	WP_076729020.1	RSM1_RS11455	GCF_001981325.1	DUF4150 domain-containing protein	Tox-PAAR-like	Methylobacterium radiotolerans	Bacteria; Proteobacteria; Alphaproteobacteria; Hyphomicrobiales; Methylobacteriaceae; Methylobacterium
NZ_MBRO01000036.1	42937	44238	WP_076730477.1	BB774_RS17645	GCF_002094475.1	VRR-NUC domain-containing protein	VRR_NUC+TM+TM	Cronobacter sakazakii	Bacteria; Proteobacteria; Gammaproteobacteria; Enterobacterales; Enterobacteriaceae; Cronobacter
NZ_CM007659.1	2420017	2420751	WP_076847316.1	BGI48_RS12515	GCF_001974745.1	VRR-NUC domain-containing protein	VRR_NUC	Burkholderia pseudomallei	Bacteria; Proteobacteria; Betaproteobacteria; Burkholderiales; Burkholderiaceae; Burkholderia; pseudomallei group
NZ_LWYI01000011.1	12816	13553	WP_076839848.1	AQ805_RS01725	GCF_001977275.1	VRR-NUC domain-containing protein	VRR_NUC	Burkholderia pseudomallei	Bacteria; Proteobacteria; Betaproteobacteria; Burkholderiales; Burkholderiaceae; Burkholderia; pseudomallei group
NZ_LWWO01000145.1	63649	64407	WP_076802840.1	AQ759_RS22360	GCF_001977565.1	VRR-NUC domain-containing protein	VRR_NUC	Burkholderia pseudomallei	Bacteria; Proteobacteria; Betaproteobacteria; Burkholderiales; Burkholderiaceae; Burkholderia; pseudomallei group
NZ_LXCS01000014.1	69764	70537	WP_076832471.1	AQ925_RS03085	GCF_001980385.1	nuclease	VRR_NUC	Burkholderia pseudomallei	Bacteria; Proteobacteria; Betaproteobacteria; Burkholderiales; Burkholderiaceae; Burkholderia; pseudomallei group
NZ_LWWN01000103.1	100582	101340	WP_076880370.1	AQ758_RS21075	GCF_001976975.1	VRR-NUC domain-containing protein	VRR_NUC	Burkholderia pseudomallei	Bacteria; Proteobacteria; Betaproteobacteria; Burkholderiales; Burkholderiaceae; Burkholderia; pseudomallei group
NZ_LWWN01000128.1	306347	307108	WP_076880691.1	AQ758_RS32295	GCF_001976975.1	VRR-NUC domain-containing protein	VRR_NUC	Burkholderia pseudomallei	Bacteria; Proteobacteria; Betaproteobacteria; Burkholderiales; Burkholderiaceae; Burkholderia; pseudomallei group
NZ_LXAK01000061.1	1515	2099	WP_076889026.1	AQ862_RS13670	GCF_001979195.1	VRR-NUC domain-containing protein	VRR_NUC	Burkholderia pseudomallei	Bacteria; Proteobacteria; Betaproteobacteria; Burkholderiales; Burkholderiaceae; Burkholderia; pseudomallei group
NZ_LXDY01000082.1	25482	26255	WP_076873044.1	AQ957_RS18340	GCF_001981025.1	nuclease	VRR_NUC	Burkholderia pseudomallei	Bacteria; Proteobacteria; Betaproteobacteria; Burkholderiales; Burkholderiaceae; Burkholderia; pseudomallei group
NZ_JQDK01000016.1	2979	3713	WP_076892870.1	X961_RS32505	GCF_000773165.1	VRR-NUC domain-containing protein	VRR_NUC	Burkholderia pseudomallei MSHR5613	Bacteria; Proteobacteria; Betaproteobacteria; Burkholderiales; Burkholderiaceae; Burkholderia; pseudomallei group
NZ_LWVI01000186.1	86	625	WP_076893224.1	AQ727_RS11895	GCF_001976575.1	VRR-NUC domain-containing protein	VRR_NUC	Burkholderia pseudomallei	Bacteria; Proteobacteria; Betaproteobacteria; Burkholderiales; Burkholderiaceae; Burkholderia; pseudomallei group
NZ_LWVJ01000049.1	1332	2093	WP_076905685.1	AQ728_RS05850	GCF_001976565.1	VRR-NUC domain-containing protein	VRR_NUC	Burkholderia pseudomallei	Bacteria; Proteobacteria; Betaproteobacteria; Burkholderiales; Burkholderiaceae; Burkholderia; pseudomallei group
NZ_LWVM01000021.1	39572	40321	WP_076897585.1	AQ731_RS02485	GCF_001976675.1	VRR-NUC domain-containing protein	VRR_NUC	Burkholderia pseudomallei	Bacteria; Proteobacteria; Betaproteobacteria; Burkholderiales; Burkholderiaceae; Burkholderia; pseudomallei group
NZ_LXCH01000137.1	2438	3175	WP_076899904.1	AQ914_RS16480	GCF_001980155.1	VRR-NUC domain-containing protein	VRR_NUC	Burkholderia pseudomallei	Bacteria; Proteobacteria; Betaproteobacteria; Burkholderiales; Burkholderiaceae; Burkholderia; pseudomallei group
NZ_LWVX01000394.1	1632	2390	WP_076913873.1	AQ742_RS37520	GCF_001977425.1	VRR-NUC domain-containing protein	VRR_NUC	Burkholderia pseudomallei	Bacteria; Proteobacteria; Betaproteobacteria; Burkholderiales; Burkholderiaceae; Burkholderia; pseudomallei group
NZ_MUJN01000004.1	469762	470493	WP_077055987.1	A8D82_RS07060	GCF_001984315.1	VRR-NUC domain-containing protein	VRR_NUC	Burkholderia cenocepacia	Bacteria; Proteobacteria; Betaproteobacteria; Burkholderiales; Burkholderiaceae; Burkholderia; Burkholderia cepacia complex
NZ_MUTL01000053.1	104440	105168	WP_077188943.1	A8E74_RS26400	GCF_001992435.1	VRR-NUC domain-containing protein	VRR_NUC	Burkholderia cenocepacia	Bacteria; Proteobacteria; Betaproteobacteria; Burkholderiales; Burkholderiaceae; Burkholderia; Burkholderia cepacia complex
NZ_MUTY01000056.1	40650	41420	WP_077180196.1	A8E89_RS16280	GCF_001992615.1	VRR-NUC domain-containing protein	VRR_NUC	Burkholderia cenocepacia	Bacteria; Proteobacteria; Betaproteobacteria; Burkholderiales; Burkholderiaceae; Burkholderia; Burkholderia cepacia complex
NZ_MPVZ02000027.1	917040	918584	WP_077472450.1	BSK43_RS16540	GCF_001999485.2	DUF4150 domain-containing protein	Tox-PAAR-like	Rhizobium sp. P44RR-XXIV	Bacteria; Proteobacteria; Alphaproteobacteria; Hyphomicrobiales; Rhizobiaceae; Rhizobium/Agrobacterium group; Rhizobium
NZ_CP017238.1	335476	336180	WP_078040575.1	BHQ31_RS01650	GCF_002007585.1	VRR-NUC domain-containing protein	VRR_NUC	Burkholderia cenocepacia	Bacteria; Proteobacteria; Betaproteobacteria; Burkholderiales; Burkholderiaceae; Burkholderia; Burkholderia cepacia complex
NZ_CP017238.1	2862604	2863869	WP_078041136.1	BHQ31_RS13745	GCF_002007585.1	VRR-NUC domain-containing protein	VRR_NUC+TM+TM	Burkholderia cenocepacia	Bacteria; Proteobacteria; Betaproteobacteria; Burkholderiales; Burkholderiaceae; Burkholderia; Burkholderia cepacia complex
NZ_MVON01000052.1	3876	4874	WP_078426824.1	MF4642_RS15925	GCF_002018925.1	hypothetical protein	LXG+RE_Bpu10I+VRR_NUC	Acinetobacter sp. MF4642	Bacteria; Proteobacteria; Gammaproteobacteria; Moraxellales; Moraxellaceae; Acinetobacter
NZ_MSDL01000037.1	13092	13970	WP_078802962.1	BFW90_RS10785	GCF_002022375.1	VRR-NUC domain protein	VRR_NUC	Pseudomonas fluorescens	Bacteria; Proteobacteria; Gammaproteobacteria; Pseudomonadales; Pseudomonadaceae; Pseudomonas
NZ_MSDL01000037.1	15536	16414	WP_078802964.1	BFW90_RS10795	GCF_002022375.1	VRR-NUC domain protein	VRR_NUC	Pseudomonas fluorescens	Bacteria; Proteobacteria; Gammaproteobacteria; Pseudomonadales; Pseudomonadaceae; Pseudomonas
NZ_JUAD01000058.1	4614	5582	WP_079392943.1	NQ20_RS28835	GCF_000797055.1	VRR-NUC domain-containing protein	VRR_NUC	Pseudomonas aeruginosa	Bacteria; Proteobacteria; Gammaproteobacteria; Pseudomonadales; Pseudomonadaceae; Pseudomonas
NZ_LT799838.1	1741212	1742108	WP_079691808.1	DABAL43B_RS07615	GCF_900168255.1	hypothetical protein	VRR_NUC+TM	Psychrobacter sp. DAB_AL43B	Bacteria; Proteobacteria; Gammaproteobacteria; Moraxellales; Moraxellaceae; Psychrobacter
NZ_MXLD01000008.1	9723	10121	WP_079774703.1	AJH78_RS15370	GCF_002033765.1	hypothetical protein		Salmonella bongori serovar 48:a:-	Bacteria; Proteobacteria; Gammaproteobacteria; Enterobacterales; Enterobacteriaceae; Salmonella
NZ_MXLD01000028.1	56	1120	WP_079775084.1	AJH78_RS22130	GCF_002033765.1	DUF4150 domain-containing protein	Tox-PAAR-like	Salmonella bongori serovar 48:a:-	Bacteria; Proteobacteria; Gammaproteobacteria; Enterobacterales; Enterobacteriaceae; Salmonella
NZ_MXOH01000007.1	218228	219292	WP_079772806.1	Y991_RS10910	GCF_002035315.1	DUF4150 domain-containing protein	Tox-PAAR-like	Salmonella bongori serovar 48:i:-	Bacteria; Proteobacteria; Gammaproteobacteria; Enterobacterales; Enterobacteriaceae; Salmonella
NZ_MXPA01000043.1	6559	7848	WP_079782407.1	AJK04_RS22345	GCF_002036055.1	VRR-NUC domain-containing protein	VRR_NUC+TM+TM	Salmonella enterica	Bacteria; Proteobacteria; Gammaproteobacteria; Enterobacterales; Enterobacteriaceae; Salmonella
NZ_MXOF01000002.1	613361	614041	WP_079777713.1	Z005_RS07285	GCF_002037625.1	hypothetical protein	Tox-PAAR-like	Salmonella bongori serovar 44:z39:-	Bacteria; Proteobacteria; Gammaproteobacteria; Enterobacterales; Enterobacteriaceae; Salmonella
NZ_MXOE01000014.1	11906	12970	WP_079794326.1	AJK16_RS13770	GCF_002035475.1	DUF4150 domain-containing protein	Tox-PAAR-like	Salmonella bongori	Bacteria; Proteobacteria; Gammaproteobacteria; Enterobacterales; Enterobacteriaceae; Salmonella
NZ_MXOE01000031.1	30732	31889	WP_079794713.1	AJK16_RS19940	GCF_002035475.1	DUF4150 domain-containing protein	Tox-PAAR-like	Salmonella bongori	Bacteria; Proteobacteria; Gammaproteobacteria; Enterobacterales; Enterobacteriaceae; Salmonella
NZ_LLOA01000022.1	62637	63344	WP_079980189.1	AO961_RS16790	GCF_001450865.1	VRR-NUC domain-containing protein	VRR_NUC	Pseudomonas aeruginosa	Bacteria; Proteobacteria; Gammaproteobacteria; Pseudomonadales; Pseudomonadaceae; Pseudomonas
NZ_MXZJ01000126.1	1863	3152	WP_080152957.1	AJJ23_RS20460	GCF_002065135.1	VRR-NUC domain-containing protein	VRR_NUC+TM	Salmonella enterica subsp. arizonae serovar 56:z4,z23,(z32):-	Bacteria; Proteobacteria; Gammaproteobacteria; Enterobacterales; Enterobacteriaceae; Salmonella
NZ_KN323013.1	1268443	1269177	WP_080306449.1	X879_RS37190	GCF_000774385.1	VRR-NUC domain-containing protein	VRR_NUC	Burkholderia pseudomallei MSHR3951	Bacteria; Proteobacteria; Betaproteobacteria; Burkholderiales; Burkholderiaceae; Burkholderia; pseudomallei group
NZ_MRXQ01000001.1	140072	141373	WP_080320379.1	BTK66_RS00625	GCF_002071735.1	VRR-NUC domain-containing protein	VRR_NUC+TM+TM	Cronobacter sakazakii	Bacteria; Proteobacteria; Gammaproteobacteria; Enterobacterales; Enterobacteriaceae; Cronobacter
NZ_JYMX01000024.1	45050	45826	WP_080324401.1	UE95_RS15355	GCF_002071875.1	nuclease	VRR_NUC	Burkholderia cenocepacia	Bacteria; Proteobacteria; Betaproteobacteria; Burkholderiales; Burkholderiaceae; Burkholderia; Burkholderia cepacia complex
NZ_JYMY01000154.1	1172	1884	WP_080326984.1	UE96_RS40775	GCF_002071905.1	VRR-NUC domain-containing protein	VRR_NUC	Burkholderia cenocepacia	Bacteria; Proteobacteria; Betaproteobacteria; Burkholderiales; Burkholderiaceae; Burkholderia; Burkholderia cepacia complex
NZ_CGFC01000031.1	41859	42593	WP_080381340.1	AP949_RS38355	GCF_001327435.1	VRR-NUC domain-containing protein	VRR_NUC	Burkholderia pseudomallei	Bacteria; Proteobacteria; Betaproteobacteria; Burkholderiales; Burkholderiaceae; Burkholderia; pseudomallei group
NZ_LOXJ01000029.1	115568	116239	WP_080407097.1	WJ31_RS31970	GCF_001524405.1	VRR-NUC domain-containing protein	VRR_NUC	Burkholderia ubonensis	Bacteria; Proteobacteria; Betaproteobacteria; Burkholderiales; Burkholderiaceae; Burkholderia; Burkholderia cepacia complex
NZ_LOVD01000097.1	38950	39657	WP_080421928.1	WI76_RS34575	GCF_001525855.1	VRR-NUC domain-containing protein	VRR_NUC	Burkholderia ubonensis	Bacteria; Proteobacteria; Betaproteobacteria; Burkholderiales; Burkholderiaceae; Burkholderia; Burkholderia cepacia complex
NZ_LPAF01000030.1	50866	51945	WP_080418727.1	WJ70_RS07850	GCF_001528205.1	DUF4150 domain-containing protein	Tox-PAAR-like+TM	Burkholderia ubonensis	Bacteria; Proteobacteria; Betaproteobacteria; Burkholderiales; Burkholderiaceae; Burkholderia; Burkholderia cepacia complex
NZ_LPDO01000054.1	326918	327670	WP_080424645.1	WK53_RS34840	GCF_001528875.1	VRR-NUC domain-containing protein	VRR_NUC	Burkholderia ubonensis	Bacteria; Proteobacteria; Betaproteobacteria; Burkholderiales; Burkholderiaceae; Burkholderia; Burkholderia cepacia complex
NZ_LPDP01000103.1	91486	92565	WP_080412541.1	WK54_RS23270	GCF_001528885.1	DUF4150 domain-containing protein	Tox-PAAR-like+TM	Burkholderia ubonensis	Bacteria; Proteobacteria; Betaproteobacteria; Burkholderiales; Burkholderiaceae; Burkholderia; Burkholderia cepacia complex
NZ_LPHD01000049.1	259207	259878	WP_080429337.1	WL29_RS11110	GCF_001531045.1	VRR-NUC domain-containing protein	VRR_NUC	Burkholderia ubonensis	Bacteria; Proteobacteria; Betaproteobacteria; Burkholderiales; Burkholderiaceae; Burkholderia; Burkholderia cepacia complex
NZ_LPHW01000093.1	64051	64758	WP_080432416.1	WL48_RS36310	GCF_001531785.1	VRR-NUC domain-containing protein	VRR_NUC	Burkholderia ubonensis	Bacteria; Proteobacteria; Betaproteobacteria; Burkholderiales; Burkholderiaceae; Burkholderia; Burkholderia cepacia complex
NZ_LXGY01000001.1	1818	2552	WP_080471739.1	AQ853_RS33440	GCF_001637025.1	VRR-NUC domain-containing protein	VRR_NUC	Burkholderia pseudomallei	Bacteria; Proteobacteria; Betaproteobacteria; Burkholderiales; Burkholderiaceae; Burkholderia; pseudomallei group
NZ_LXGY01000076.1	1	367	WP_080471761.1	AQ853_RS35735	GCF_001637025.1	VRR-NUC domain-containing protein	VRR_NUC	Burkholderia pseudomallei	Bacteria; Proteobacteria; Betaproteobacteria; Burkholderiales; Burkholderiaceae; Burkholderia; pseudomallei group
NZ_AQOL01000648.1	1936	2670	WP_080631055.1	D590_RS38185	GCF_000365265.1	VRR-NUC domain-containing protein	VRR_NUC	Burkholderia gladioli 3848s-5	Bacteria; Proteobacteria; Betaproteobacteria; Burkholderiales; Burkholderiaceae; Burkholderia
NZ_CP020452.2	1994987	1996468	WP_080614157.1	A6J88_RS24085	GCF_002073715.2	hypothetical protein	VRR_NUC+TM+TM	Neisseria mucosa	Bacteria; Proteobacteria; Betaproteobacteria; Neisseriales; Neisseriaceae; Neisseria
NZ_CP020452.2	2051616	2053175	WP_080614180.1	A6J88_RS24325	GCF_002073715.2	hypothetical protein	TM	Neisseria mucosa	Bacteria; Proteobacteria; Betaproteobacteria; Neisseriales; Neisseriaceae; Neisseria
NZ_KN151078.1	196086	196790	WP_080757526.1	LA03_RS38620	GCF_000757585.1	VRR-NUC domain-containing protein	VRR_NUC	Burkholderia gladioli	Bacteria; Proteobacteria; Betaproteobacteria; Burkholderiales; Burkholderiaceae; Burkholderia
NZ_KN151085.1	44493	45245	WP_080757545.1	LA03_RS38690	GCF_000757585.1	VRR-NUC domain-containing protein	VRR_NUC	Burkholderia gladioli	Bacteria; Proteobacteria; Betaproteobacteria; Burkholderiales; Burkholderiaceae; Burkholderia
NZ_MRWZ01000010.1	88051	89352	WP_080781036.1	BS419_RS03330	GCF_002075415.1	VRR-NUC domain-containing protein	VRR_NUC+TM+TM	Cronobacter sakazakii	Bacteria; Proteobacteria; Gammaproteobacteria; Enterobacterales; Enterobacteriaceae; Cronobacter
NZ_UWYW01000001.1	493969	494664	WP_080757325.1	EIK60_RS02325	GCF_900608535.1	VRR-NUC domain-containing protein	VRR_NUC	Burkholderia gladioli	Bacteria; Proteobacteria; Betaproteobacteria; Burkholderiales; Burkholderiaceae; Burkholderia
NZ_UWYW01000001.1	3367012	3367743	WP_080757450.1	EIK60_RS15355	GCF_900608535.1	VRR-NUC domain-containing protein	VRR_NUC	Burkholderia gladioli	Bacteria; Proteobacteria; Betaproteobacteria; Burkholderiales; Burkholderiaceae; Burkholderia
NZ_SWKF01000005.1	1318602	1319738	WP_080853971.1	CFBP4996_RS25390	GCF_005144435.1	DUF4150 domain-containing protein	Tox-PAAR-like	Agrobacterium tumefaciens	Bacteria; Proteobacteria; Alphaproteobacteria; Hyphomicrobiales; Rhizobiaceae; Rhizobium/Agrobacterium group; Agrobacterium; Agrobacterium tumefaciens complex
NZ_CP011110.1	3777006	3777707	WP_080925972.1	PCL1606_RS16685	GCF_000963835.1	VRR-NUC domain-containing protein	VRR_NUC+TM	Pseudomonas chlororaphis	Bacteria; Proteobacteria; Gammaproteobacteria; Pseudomonadales; Pseudomonadaceae; Pseudomonas
NZ_JZDO01000002.1	132857	136213	WP_080933095.1	YA69_RS01195	GCF_000974965.1	type VI secretion system tip protein VgrG	Phage_GPD+Phage_base_V+T6SS_Vgr+DUF2345+VRR_NUC+TM+TM	Cronobacter sakazakii	Bacteria; Proteobacteria; Gammaproteobacteria; Enterobacterales; Enterobacteriaceae; Cronobacter
NZ_JSWU01000030.1	12	1526	WP_080948058.1	OA40_RS19785	GCF_001006565.1	VRR-NUC domain-containing protein	VRR_NUC+TM+TM	Morganella morganii	Bacteria; Proteobacteria; Gammaproteobacteria; Enterobacterales; Morganellaceae; Morganella
NZ_LAVN01000004.1	394503	395237	WP_080959564.1	XF14_RS38465	GCF_000981885.1	VRR-NUC domain-containing protein	VRR_NUC	Burkholderia gladioli	Bacteria; Proteobacteria; Betaproteobacteria; Burkholderiales; Burkholderiaceae; Burkholderia
NZ_JPZC01000130.1	2933	3682	WP_081000734.1	AI46_RS31035	GCF_001267755.1	VRR-NUC domain-containing protein	VRR_NUC	Burkholderia multivorans R-20526	Bacteria; Proteobacteria; Betaproteobacteria; Burkholderiales; Burkholderiaceae; Burkholderia; Burkholderia cepacia complex
NZ_LFWB01000036.1	26	1540	WP_080998345.1	AC068_RS02885	GCF_001274995.1	VRR-NUC domain-containing protein	VRR_NUC+TM+TM	Morganella morganii	Bacteria; Proteobacteria; Gammaproteobacteria; Enterobacterales; Morganellaceae; Morganella
NZ_WITE01000002.1	1370730	1371464	WP_080959591.1	LvStA_RS06895	GCF_009912275.1	VRR-NUC domain-containing protein	VRR_NUC	Burkholderia gladioli	Bacteria; Proteobacteria; Betaproteobacteria; Burkholderiales; Burkholderiaceae; Burkholderia
NZ_CP013730.1	1330216	1330968	WP_081051801.1	P350_RS38025	GCF_000701165.1	VRR-NUC domain-containing protein	VRR_NUC	Burkholderia cepacia JBK9	Bacteria; Proteobacteria; Betaproteobacteria; Burkholderiales; Burkholderiaceae; Burkholderia; Burkholderia cepacia complex
NZ_LHVC01000005.1	330741	331127	WP_081002269.1	AD657_RS12900	GCF_001269625.1	VRR-NUC domain-containing protein	VRR_NUC+TM	Pseudomonas chlororaphis subsp. chlororaphis	Bacteria; Proteobacteria; Gammaproteobacteria; Pseudomonadales; Pseudomonadaceae; Pseudomonas
NZ_LPBT01000047.1	2215	2958	WP_081060361.1	WT22_RS30475	GCF_001526805.1	nuclease	VRR_NUC	Burkholderia territorii	Bacteria; Proteobacteria; Betaproteobacteria; Burkholderiales; Burkholderiaceae; Burkholderia; Burkholderia cepacia complex
NZ_LOYK01000085.1	92878	93630	WP_081062490.1	WS93_RS38850	GCF_001526255.1	nuclease	VRR_NUC	Burkholderia cepacia	Bacteria; Proteobacteria; Betaproteobacteria; Burkholderiales; Burkholderiaceae; Burkholderia; Burkholderia cepacia complex
NZ_LOZK01000002.1	87590	88324	WP_081060659.1	WJ59_RS34770	GCF_001527485.1	VRR-NUC domain-containing protein	VRR_NUC	Burkholderia gladioli	Bacteria; Proteobacteria; Betaproteobacteria; Burkholderiales; Burkholderiaceae; Burkholderia
NZ_LOZK01000065.1	126323	127027	WP_081060909.1	WJ59_RS35885	GCF_001527485.1	VRR-NUC domain-containing protein	VRR_NUC	Burkholderia gladioli	Bacteria; Proteobacteria; Betaproteobacteria; Burkholderiales; Burkholderiaceae; Burkholderia
NZ_LOZS01000061.1	26332	27036	WP_081063189.1	WT09_RS34395	GCF_001527645.1	VRR-NUC domain-containing protein	VRR_NUC	Burkholderia stagnalis	Bacteria; Proteobacteria; Betaproteobacteria; Burkholderiales; Burkholderiaceae; Burkholderia; Burkholderia cepacia complex
NZ_LPCT01000055.1	67543	68262	WP_081068896.1	WK33_RS28580	GCF_001528605.1	VRR-NUC domain-containing protein	VRR_NUC	Burkholderia multivorans	Bacteria; Proteobacteria; Betaproteobacteria; Burkholderiales; Burkholderiaceae; Burkholderia; Burkholderia cepacia complex
NZ_LPCN01000092.1	159919	160626	WP_081065149.1	WK26_RS32830	GCF_001529585.1	VRR-NUC domain-containing protein	VRR_NUC	Burkholderia vietnamiensis	Bacteria; Proteobacteria; Betaproteobacteria; Burkholderiales; Burkholderiaceae; Burkholderia; Burkholderia cepacia complex
NZ_LPLA01000039.1	408989	409741	WP_081083944.1	WM06_RS37695	GCF_001533445.1	nuclease	VRR_NUC	Burkholderia cepacia	Bacteria; Proteobacteria; Betaproteobacteria; Burkholderiales; Burkholderiaceae; Burkholderia; Burkholderia cepacia complex
NZ_CYSX01000007.1	221275	222012	WP_081330377.1	AOZ51_RS28305	GCF_001299135.1	VRR-NUC domain-containing protein	VRR_NUC	Achromobacter dolens	Bacteria; Proteobacteria; Betaproteobacteria; Burkholderiales; Alcaligenaceae; Achromobacter
NZ_FPKH01000002.1	82773	83447	WP_081368179.1	BT188_RS10200	GCF_900119665.1	VRR-NUC domain-containing protein	VRR_NUC	Janthinobacterium lividum	Bacteria; Proteobacteria; Betaproteobacteria; Burkholderiales; Oxalobacteraceae; Janthinobacterium
NZ_CP016895.1	2102425	2102760	WP_081408674.1	BFG52_RS09515	GCF_001704115.1	VRR-NUC domain-containing protein	VRR_NUC+TM	Acinetobacter larvae	Bacteria; Proteobacteria; Gammaproteobacteria; Moraxellales; Moraxellaceae; Acinetobacter
NZ_MUKU01000026.1	26664	27902	WP_081548768.1	B0T39_RS17310	GCF_002081825.1	VRR-NUC domain-containing protein	VRR_NUC+TM+TM	Chromobacterium haemolyticum	Bacteria; Proteobacteria; Betaproteobacteria; Neisseriales; Chromobacteriaceae; Chromobacterium
NZ_MUKS01000014.1	110262	111440	WP_081573403.1	B0T41_RS18010	GCF_002081775.1	VRR-NUC domain-containing protein	VRR_NUC+TM+TM	Chromobacterium violaceum	Bacteria; Proteobacteria; Betaproteobacteria; Neisseriales; Chromobacteriaceae; Chromobacterium
NZ_MUKT01000045.1	28651	29886	WP_081576249.1	B0T40_RS22180	GCF_002081815.1	VRR-NUC domain-containing protein	VRR_NUC+TM+TM	Chromobacterium haemolyticum	Bacteria; Proteobacteria; Betaproteobacteria; Neisseriales; Chromobacteriaceae; Chromobacterium
NZ_CP010892.1	2918192	2918893	WP_082061081.1	TO66_RS13410	GCF_000931465.1	VRR-NUC domain-containing protein	VRR_NUC	Pseudomonas sp. MRSN12121	Bacteria; Proteobacteria; Gammaproteobacteria; Pseudomonadales; Pseudomonadaceae; Pseudomonas
NZ_CP011503.1	1705119	1705655	WP_082146066.1	ABD05_RS35865	GCF_001028665.1	VRR-NUC domain-containing protein	VRR_NUC	Burkholderia pyrrocinia	Bacteria; Proteobacteria; Betaproteobacteria; Burkholderiales; Burkholderiaceae; Burkholderia; Burkholderia cepacia complex
NZ_JYBG01000019.1	95930	96664	WP_082251836.1	SY87_RS36865	GCF_000932075.1	VRR-NUC domain-containing protein	VRR_NUC	Burkholderia pseudomallei	Bacteria; Proteobacteria; Betaproteobacteria; Burkholderiales; Burkholderiaceae; Burkholderia; pseudomallei group
NZ_CYTC01000014.1	635	1221	WP_082387293.1	AOZ60_RS27050	GCF_001298955.1	VRR-NUC domain-containing protein	VRR_NUC	Achromobacter kerstersii	Bacteria; Proteobacteria; Betaproteobacteria; Burkholderiales; Alcaligenaceae; Achromobacter
NZ_LDSL01000149.1	573	1871	WP_082702665.1	NS331_RS21135	GCF_001476815.1	VRR-NUC domain-containing protein	VRR_NUC+TM+TM	Pseudacidovorax intermedius	Bacteria; Proteobacteria; Betaproteobacteria; Burkholderiales; Comamonadaceae; Pseudacidovorax
NZ_LOVS01000215.1	878	1615	WP_082721447.1	WS62_RS35730	GCF_001523835.1	nuclease	VRR_NUC	Burkholderia sp. ABCPW 14	Bacteria; Proteobacteria; Betaproteobacteria; Burkholderiales; Burkholderiaceae; Burkholderia; pseudomallei group
NZ_CP013424.1	2505109	2505843	WP_082744920.1	WS86_RS12340	GCF_001524625.2	VRR-NUC domain-containing protein	VRR_NUC	Burkholderia savannae	Bacteria; Proteobacteria; Betaproteobacteria; Burkholderiales; Burkholderiaceae; Burkholderia; pseudomallei group
NZ_LOZR01000028.1	243644	244363	WP_082743599.1	WT08_RS30990	GCF_001527625.1	VRR-NUC domain-containing protein	VRR_NUC	Burkholderia sp. MSMB1552	Bacteria; Proteobacteria; Betaproteobacteria; Burkholderiales; Burkholderiaceae; Burkholderia; pseudomallei group
NZ_LOZU01000027.1	29909	30613	WP_082760681.1	WJ63_RS37775	GCF_001527685.1	VRR-NUC domain-containing protein	VRR_NUC	Burkholderia pyrrocinia	Bacteria; Proteobacteria; Betaproteobacteria; Burkholderiales; Burkholderiaceae; Burkholderia; Burkholderia cepacia complex
NZ_CP013457.1	522815	523579	WP_082759385.1	WT60_RS02660	GCF_001532025.2	VRR-NUC domain-containing protein	VRR_NUC	Burkholderia sp. MSMB617WGS	Bacteria; Proteobacteria; Betaproteobacteria; Burkholderiales; Burkholderiaceae; Burkholderia; pseudomallei group
NZ_MASQ01000087.1	4305	4544	WP_083091491.1	BBC27_RS15590	GCF_001685225.1	VRR-NUC domain-containing protein	VRR_NUC	Acidithiobacillus ferrivorans	Bacteria; Proteobacteria; Acidithiobacillia; Acidithiobacillales; Acidithiobacillaceae; Acidithiobacillus
NZ_MWJQ01000001.1	1050137	1051381	WP_083081678.1	B2G74_RS04755	GCF_002087245.1	VRR-NUC domain-containing protein	VRR_NUC+TM+TM	Burkholderia sp. A27	Bacteria; Proteobacteria; Betaproteobacteria; Burkholderiales; Burkholderiaceae; Burkholderia
NZ_MWJQ01000011.1	29635	30381	WP_083086724.1	B2G74_RS32825	GCF_002087245.1	VRR-NUC domain-containing protein	VRR_NUC	Burkholderia sp. A27	Bacteria; Proteobacteria; Betaproteobacteria; Burkholderiales; Burkholderiaceae; Burkholderia
NZ_LYSP01000106.1	630	950	WP_083272688.1	A9G05_RS26215	GCF_001728945.1	VRR-NUC domain-containing protein	VRR_NUC	Pseudomonas sp. ENNP23	Bacteria; Proteobacteria; Gammaproteobacteria; Pseudomonadales; Pseudomonadaceae; Pseudomonas
NZ_VWPA01000047.1	107105	108253	WP_083352402.1	F1743_RS17360	GCF_009829275.1	VRR-NUC domain-containing protein	VRR_NUC	Pseudomonas koreensis	Bacteria; Proteobacteria; Gammaproteobacteria; Pseudomonadales; Pseudomonadaceae; Pseudomonas
NZ_MWZF01000228.1	6019	6717	WP_083568673.1	BKN47_RS29870	GCF_002088145.1	VRR-NUC domain-containing protein	VRR_NUC	Pseudomonas aeruginosa	Bacteria; Proteobacteria; Gammaproteobacteria; Pseudomonadales; Pseudomonadaceae; Pseudomonas
NZ_MWWL01000073.1	183	890	WP_083555357.1	B1H15_RS00410	GCF_002088225.1	VRR-NUC domain-containing protein	VRR_NUC	Pseudomonas aeruginosa	Bacteria; Proteobacteria; Gammaproteobacteria; Pseudomonadales; Pseudomonadaceae; Pseudomonas
NZ_BADI01000758.1	4535	5033	WP_083893575.1	I5W_RS30130	GCF_000333555.1	VRR-NUC domain-containing protein	VRR_NUC	Herbaspirillum sp. B65	Bacteria; Proteobacteria; Betaproteobacteria; Burkholderiales; Oxalobacteraceae; Herbaspirillum; unclassified Herbaspirillum
NZ_JJMR01000004.1	110680	111423	WP_084152384.1	DP01_RS37345	GCF_000633145.1	VRR-NUC domain-containing protein	DUF4776+VRR_NUC	Burkholderia sp. A1	Bacteria; Proteobacteria; Betaproteobacteria; Burkholderiales; Burkholderiaceae; Burkholderia
NZ_JJMR01000018.1	2897	3601	WP_084152461.1	DP01_RS37725	GCF_000633145.1	VRR-NUC domain-containing protein	VRR_NUC	Burkholderia sp. A1	Bacteria; Proteobacteria; Betaproteobacteria; Burkholderiales; Burkholderiaceae; Burkholderia
NZ_JJMR01000183.1	1905	3221	WP_084152669.1	DP01_RS38435	GCF_000633145.1	VRR-NUC domain-containing protein	VRR_NUC+TM+TM+TM	Burkholderia sp. A1	Bacteria; Proteobacteria; Betaproteobacteria; Burkholderiales; Burkholderiaceae; Burkholderia
NZ_BAYA01000013.1	9035	9466	WP_084162358.1	BBA01S_RS41875	GCF_000685015.1	VRR-NUC domain-containing protein	VRR_NUC	Paraburkholderia bannensis NBRC 103871	Bacteria; Proteobacteria; Betaproteobacteria; Burkholderiales; Burkholderiaceae; Paraburkholderia
NZ_MQZX01000034.1	11793	13028	WP_084194050.1	BS642_RS07750	GCF_001953795.1	VRR-NUC domain-containing protein	VRR_NUC+TM+TM	Chromobacterium violaceum	Bacteria; Proteobacteria; Betaproteobacteria; Neisseriales; Chromobacteriaceae; Chromobacterium
NZ_BDAG01000025.1	88994	90385	WP_084321629.1	PMI01S_RS19010	GCF_002091715.1	VRR-NUC domain-containing protein	VRR_NUC+DUF3168+TM+TM+TM	Pseudomonas migulae NBRC 103157	Bacteria; Proteobacteria; Gammaproteobacteria; Pseudomonadales; Pseudomonadaceae; Pseudomonas
NZ_NAHR01000031.1	29387	30964	WP_084390375.1	B5800_RS09885	GCF_002088795.1	hypothetical protein	VRR_NUC	Gilliamella apicola	Bacteria; Proteobacteria; Gammaproteobacteria; Orbales; Orbaceae; Gilliamella
NZ_CP020737.1	438806	439537	WP_084900098.1	B7P44_RS02150	GCF_002097715.1	VRR-NUC domain-containing protein	VRR_NUC	Paraburkholderia acidophila	Bacteria; Proteobacteria; Betaproteobacteria; Burkholderiales; Burkholderiaceae; Paraburkholderia
NZ_MBRX01000033.1	27345	28646	WP_085036924.1	BB762_RS14220	GCF_002094645.1	VRR-NUC domain-containing protein	VRR_NUC+TM+TM	Cronobacter sakazakii	Bacteria; Proteobacteria; Gammaproteobacteria; Enterobacterales; Enterobacteriaceae; Cronobacter
NZ_MBRV01000311.1	288	1589	WP_085046709.1	BB759_RS17225	GCF_002094595.1	VRR-NUC domain-containing protein	VRR_NUC+TM+TM	Cronobacter sakazakii	Bacteria; Proteobacteria; Gammaproteobacteria; Enterobacterales; Enterobacteriaceae; Cronobacter
NZ_MBRV01000326.1	2583	3845	WP_085046741.1	BB759_RS17545	GCF_002094595.1	VRR-NUC domain-containing protein	VRR_NUC	Cronobacter sakazakii	Bacteria; Proteobacteria; Gammaproteobacteria; Enterobacterales; Enterobacteriaceae; Cronobacter
NZ_FMWS01000100.1	732	2294	WP_085166114.1	B9N71_RS12345	GCF_900103255.1	VRR-NUC domain-containing protein	VRR_NUC	Gilliamella bombi	Bacteria; Proteobacteria; Gammaproteobacteria; Orbales; Orbaceae; Gilliamella
NZ_PNXZ01000045.1	10754	11503	WP_085228408.1	C0Z17_RS28260	GCF_002879875.1	VRR-NUC domain-containing protein	VRR_NUC	Trinickia caryophylli	Bacteria; Proteobacteria; Betaproteobacteria; Burkholderiales; Burkholderiaceae; Trinickia
NZ_FXAG01000006.1	32206	33066	WP_085275768.1	B9N72_RS07285	GCF_900177275.1	hypothetical protein	SP	Pseudogulbenkiania subflava DSM 22618	Bacteria; Proteobacteria; Betaproteobacteria; Neisseriales; Chromobacteriaceae; Pseudogulbenkiania
NZ_NCWE01000025.1	162755	163995	WP_085371590.1	B8W48_RS09020	GCF_002107665.1	VRR-NUC domain-containing protein	VRR_NUC	Cronobacter sakazakii	Bacteria; Proteobacteria; Gammaproteobacteria; Enterobacterales; Enterobacteriaceae; Cronobacter
NZ_MTAB01000010.1	1137	2255	WP_085359028.1	BV912_RS05595	GCF_002108545.1	VRR-NUC domain-containing protein	VRR_NUC+TM+TM	Neisseria dumasiana	Bacteria; Proteobacteria; Betaproteobacteria; Neisseriales; Neisseriaceae; Neisseria
NZ_NCWL01000001.1	19188	20436	WP_085391801.1	B8W55_RS00080	GCF_002107765.1	VRR-NUC domain-containing protein	VRR_NUC	Cronobacter sakazakii	Bacteria; Proteobacteria; Gammaproteobacteria; Enterobacterales; Enterobacteriaceae; Cronobacter
NZ_CP018381.1	1232847	1234130	WP_085504457.1	BOC42_RS28120	GCF_002110945.1	VRR-NUC domain-containing protein	VRR_NUC+TM+TM	Burkholderia pseudomallei	Bacteria; Proteobacteria; Betaproteobacteria; Burkholderiales; Burkholderiaceae; Burkholderia; pseudomallei group
NZ_CP018381.1	1249362	1250096	WP_085504471.1	BOC42_RS28190	GCF_002110945.1	VRR-NUC domain-containing protein	VRR_NUC	Burkholderia pseudomallei	Bacteria; Proteobacteria; Betaproteobacteria; Burkholderiales; Burkholderiaceae; Burkholderia; pseudomallei group
NZ_CP018393.1	2558765	2559493	WP_085507740.1	BOC48_RS13320	GCF_002110985.1	VRR-NUC domain-containing protein	VRR_NUC	Burkholderia pseudomallei	Bacteria; Proteobacteria; Betaproteobacteria; Burkholderiales; Burkholderiaceae; Burkholderia; pseudomallei group
NZ_CP018391.1	201141	201872	WP_085545832.1	BOC47_RS00930	GCF_002110965.1	VRR-NUC domain-containing protein	VRR_NUC	Burkholderia pseudomallei	Bacteria; Proteobacteria; Betaproteobacteria; Burkholderiales; Burkholderiaceae; Burkholderia; pseudomallei group
NZ_CP018404.1	2498082	2498816	WP_085517326.1	BOC53_RS12325	GCF_002111005.1	VRR-NUC domain-containing protein	VRR_NUC	Burkholderia pseudomallei	Bacteria; Proteobacteria; Betaproteobacteria; Burkholderiales; Burkholderiaceae; Burkholderia; pseudomallei group
NZ_CP018410.1	2227616	2228374	WP_085509439.1	BOC57_RS11635	GCF_002111045.1	VRR-NUC domain-containing protein	VRR_NUC	Burkholderia pseudomallei	Bacteria; Proteobacteria; Betaproteobacteria; Burkholderiales; Burkholderiaceae; Burkholderia; pseudomallei group
NZ_CP018368.1	1592921	1593676	WP_085546295.1	BOC35_RS24530	GCF_002111065.1	VRR-NUC domain-containing protein	VRR_NUC	Burkholderia pseudomallei	Bacteria; Proteobacteria; Betaproteobacteria; Burkholderiales; Burkholderiaceae; Burkholderia; pseudomallei group
NZ_CP018372.1	443388	444149	WP_085519546.1	BOC37_RS18300	GCF_002111345.1	VRR-NUC domain-containing protein	VRR_NUC	Burkholderia pseudomallei	Bacteria; Proteobacteria; Betaproteobacteria; Burkholderiales; Burkholderiaceae; Burkholderia; pseudomallei group
NZ_CP018382.1	1426223	1426957	WP_085547170.1	BOC43_RS07575	GCF_002111365.1	VRR-NUC domain-containing protein	VRR_NUC	Burkholderia pseudomallei	Bacteria; Proteobacteria; Betaproteobacteria; Burkholderiales; Burkholderiaceae; Burkholderia; pseudomallei group
NZ_CP015650.1	2784778	2785479	WP_085765020.1	A6748_RS13170	GCF_002117045.1	VRR-NUC domain-containing protein	VRR_NUC+TM	Pseudomonas aeruginosa	Bacteria; Proteobacteria; Gammaproteobacteria; Pseudomonadales; Pseudomonadaceae; Pseudomonas
NZ_MUBK01000012.1	24440	25954	WP_086112553.1	Xbed_RS08745	GCF_002127545.1	VRR-NUC domain-containing protein	VRR_NUC+TM+TM	Xenorhabdus beddingii	Bacteria; Proteobacteria; Gammaproteobacteria; Enterobacterales; Morganellaceae; Xenorhabdus
NZ_MZNG01000046.1	3009	4589	WP_086271998.1	B5S42_RS08750	GCF_002141555.1	VRR-NUC domain-containing protein	VRR_NUC	Gilliamella apicola	Bacteria; Proteobacteria; Gammaproteobacteria; Orbales; Orbaceae; Gilliamella
NZ_NASA01000028.1	1601	3181	WP_086289626.1	B6D03_RS10605	GCF_002142265.1	VRR-NUC domain-containing protein	VRR_NUC	Gilliamella apicola	Bacteria; Proteobacteria; Gammaproteobacteria; Orbales; Orbaceae; Gilliamella
NZ_MZNE01000108.1	2114	3691	WP_086301674.1	B5S40_RS13940	GCF_002141515.1	hypothetical protein	VRR_NUC	Gilliamella apicola	Bacteria; Proteobacteria; Gammaproteobacteria; Orbales; Orbaceae; Gilliamella
NZ_MZNH01000201.1	94	1671	WP_086327233.1	B5S43_RS09655	GCF_002141575.1	VRR-NUC domain-containing protein	VRR_NUC	Gilliamella apicola	Bacteria; Proteobacteria; Gammaproteobacteria; Orbales; Orbaceae; Gilliamella
NZ_NASB01000026.1	36630	38207	WP_086337103.1	B6D19_RS10375	GCF_002142285.1	hypothetical protein	VRR_NUC	Gilliamella apicola	Bacteria; Proteobacteria; Gammaproteobacteria; Orbales; Orbaceae; Gilliamella
NZ_VHEI01000005.1	3309	4271	WP_086374703.1	FJV06_RS01005	GCF_006492505.1	hypothetical protein	SP	Acinetobacter baumannii	Bacteria; Proteobacteria; Gammaproteobacteria; Moraxellales; Moraxellaceae; Acinetobacter; Acinetobacter calcoaceticus/baumannii complex
NZ_MVOO01000001.1	790622	791914	WP_086791386.1	B1722_RS03545	GCF_002156405.1	VRR-NUC domain-containing protein	VRR_NUC+TM+TM+TM	Pseudomonas sp. SCPG-7	Bacteria; Proteobacteria; Gammaproteobacteria; Pseudomonadales; Pseudomonadaceae; Pseudomonas
NZ_FCOJ02000034.1	5457	6416	WP_086970967.1	AWB82_RS21935	GCF_001545035.1	DUF4150 domain-containing protein	Tox-PAAR-like	Caballeronia glebae	Bacteria; Proteobacteria; Betaproteobacteria; Burkholderiales; Burkholderiaceae; Caballeronia
NZ_NDIV01000171.1	20266	21543	WP_087450640.1	EF450_RS23420	GCF_002162415.1	VRR-NUC domain-containing protein	VRR_NUC+TM+TM	Enterobacter roggenkampii	Bacteria; Proteobacteria; Gammaproteobacteria; Enterobacterales; Enterobacteriaceae; Enterobacter; Enterobacter cloacae complex
NZ_CP020892.1	2498959	2499660	WP_087516923.1	B9K09_RS11480	GCF_002163625.1	VRR-NUC domain-containing protein	VRR_NUC	Pseudomonas sp. M30-35	Bacteria; Proteobacteria; Gammaproteobacteria; Pseudomonadales; Pseudomonadaceae; Pseudomonas
NZ_MTHP01000013.1	49838	50563	WP_087674882.1	BV326_RS06200	GCF_002174995.1	VRR-NUC domain-containing protein	VRR_NUC	Pseudomonas syringae pv. actinidiae	Bacteria; Proteobacteria; Gammaproteobacteria; Pseudomonadales; Pseudomonadaceae; Pseudomonas; Pseudomonas syringae
NZ_NHOO01000001.1	10548	11783	WP_087696987.1	CBW21_RS00060	GCF_002179535.1	VRR-NUC domain-containing protein	VRR_NUC+TM+TM	Chromobacterium violaceum	Bacteria; Proteobacteria; Betaproteobacteria; Neisseriales; Chromobacteriaceae; Chromobacterium
NZ_MVFS01000011.1	8139	8834	WP_087770380.1	XocBAI15_RS01480	GCF_002189395.1	VRR-NUC domain-containing protein	VRR_NUC	Xanthomonas oryzae pv. oryzicola	Bacteria; Proteobacteria; Gammaproteobacteria; Xanthomonadales; Xanthomonadaceae; Xanthomonas
NZ_NION01000045.1	159528	160229	WP_088135664.1	CDC12_RS17505	GCF_002193745.1	VRR-NUC domain-containing protein	VRR_NUC+TM	Pseudomonas aeruginosa	Bacteria; Proteobacteria; Gammaproteobacteria; Pseudomonadales; Pseudomonadaceae; Pseudomonas
NZ_NIXM01000001.1	395177	396478	WP_088274686.1	IMT26_RS01960	GCF_002200235.1	VRR-NUC domain-containing protein	VRR_NUC+TM+TM	Cronobacter sakazakii	Bacteria; Proteobacteria; Gammaproteobacteria; Enterobacterales; Enterobacteriaceae; Cronobacter
NZ_NIXM01000006.1	373971	375233	WP_088276683.1	IMT26_RS11055	GCF_002200235.1	VRR-NUC domain-containing protein	VRR_NUC	Cronobacter sakazakii	Bacteria; Proteobacteria; Gammaproteobacteria; Enterobacterales; Enterobacteriaceae; Cronobacter
NZ_MYFJ01000012.1	18694	20052	WP_088371247.1	B5C26_RS01320	GCF_002204205.1	VRR-NUC domain-containing protein	VRR_NUC+TM+TM	Photorhabdus luminescens	Bacteria; Proteobacteria; Gammaproteobacteria; Enterobacterales; Morganellaceae; Photorhabdus
NZ_MYFJ01000054.1	1459	2817	WP_088374558.1	B5C26_RS19325	GCF_002204205.1	VRR-NUC domain-containing protein	VRR_NUC+TM+TM	Photorhabdus luminescens	Bacteria; Proteobacteria; Gammaproteobacteria; Enterobacterales; Morganellaceae; Photorhabdus
NZ_MYFJ01000063.1	509	1867	WP_088374995.1	B5C26_RS22015	GCF_002204205.1	VRR-NUC domain-containing protein	VRR_NUC+TM+TM	Photorhabdus luminescens	Bacteria; Proteobacteria; Gammaproteobacteria; Enterobacterales; Morganellaceae; Photorhabdus
NZ_MYFJ01000068.1	23186	24544	WP_088375082.1	B5C26_RS22675	GCF_002204205.1	VRR-NUC domain-containing protein	VRR_NUC+TM+TM	Photorhabdus luminescens	Bacteria; Proteobacteria; Gammaproteobacteria; Enterobacterales; Morganellaceae; Photorhabdus
NZ_JAHPMK010000010.1	79421	80170	WP_088926109.1	KTD14_RS18945	GCF_019040875.1	nuclease	VRR_NUC	Burkholderia multivorans	Bacteria; Proteobacteria; Betaproteobacteria; Burkholderiales; Burkholderiaceae; Burkholderia; Burkholderia cepacia complex
NZ_NKFG01000002.1	116937	117674	WP_089430518.1	CFB40_RS02070	GCF_002223155.1	VRR-NUC domain-containing protein	VRR_NUC	Burkholderia sp. AU31652	Bacteria; Proteobacteria; Betaproteobacteria; Burkholderiales; Burkholderiaceae; Burkholderia
NZ_NKFG01000005.1	1627189	1628454	WP_089432667.1	CFB40_RS24870	GCF_002223155.1	VRR-NUC domain-containing protein	VRR_NUC+TM+TM	Burkholderia sp. AU31652	Bacteria; Proteobacteria; Betaproteobacteria; Burkholderiales; Burkholderiaceae; Burkholderia
NZ_NKFH01000004.1	1257569	1258348	WP_089445549.1	CFB50_RS08590	GCF_002223135.1	nuclease	VRR_NUC	Burkholderia sp. AU33423	Bacteria; Proteobacteria; Betaproteobacteria; Burkholderiales; Burkholderiaceae; Burkholderia
NZ_NKFH01000005.1	1102397	1103152	WP_089446673.1	CFB50_RS17740	GCF_002223135.1	VRR-NUC domain-containing protein	VRR_NUC	Burkholderia sp. AU33423	Bacteria; Proteobacteria; Betaproteobacteria; Burkholderiales; Burkholderiaceae; Burkholderia
NZ_NKFM01000051.1	51262	52527	WP_089485831.1	CFB82_RS25785	GCF_002223085.1	VRR-NUC domain-containing protein	VRR_NUC+TM+TM	Burkholderia sp. HI2714	Bacteria; Proteobacteria; Betaproteobacteria; Burkholderiales; Burkholderiaceae; Burkholderia
NZ_NKFF01000002.1	141204	141977	WP_089488112.1	CFB44_RS02100	GCF_002223185.1	nuclease	VRR_NUC	Burkholderia sp. AU31280	Bacteria; Proteobacteria; Betaproteobacteria; Burkholderiales; Burkholderiaceae; Burkholderia
NZ_NIFO01000005.1	18279	19292	WP_089605447.1	CDA10_RS09885	GCF_002233755.1	nuclease	TM+TM	Acinetobacter piscicola	Bacteria; Proteobacteria; Gammaproteobacteria; Moraxellales; Moraxellaceae; Acinetobacter
NZ_FLUY01001655.1	739	1908	WP_089729247.1	BQ17_RS17380	GCF_900092655.1	DUF4150 domain-containing protein	Tox-PAAR-like	Candidatus Thiosymbion oneisti	Bacteria; Proteobacteria; Gammaproteobacteria; Chromatiales; Chromatiaceae; Candidatus Thiosymbion
NZ_VFIL01000009.1	52078	52779	WP_090292642.1	FJD34_RS19740	GCF_007858285.1	VRR-NUC domain-containing protein	VRR_NUC+TM	Pseudomonas brenneri	Bacteria; Proteobacteria; Gammaproteobacteria; Pseudomonadales; Pseudomonadaceae; Pseudomonas
NZ_FNCJ01000006.1	48270	49016	WP_090685338.1	BLQ92_RS15105	GCF_900100735.1	VRR-NUC domain-containing protein	VRR_NUC	Paraburkholderia phenazinium	Bacteria; Proteobacteria; Betaproteobacteria; Burkholderiales; Burkholderiaceae; Paraburkholderia
NZ_FNPW01000025.1	6011	6712	WP_092305880.1	BLV20_RS29430	GCF_900107395.1	VRR-NUC domain-containing protein	VRR_NUC+TM	Pseudomonas sp. NFIX28	Bacteria; Proteobacteria; Gammaproteobacteria; Pseudomonadales; Pseudomonadaceae; Pseudomonas
NZ_FORX01000023.1	70983	71894	WP_092378883.1	BMZ40_RS17335	GCF_900114115.1	VRR-NUC domain-containing protein	SP+VRR_NUC	Desulfomicrobium apsheronum	Bacteria; Proteobacteria; Deltaproteobacteria; Desulfovibrionales; Desulfomicrobiaceae; Desulfomicrobium
NZ_NITY01000012.1	97520	99097	WP_092511321.1	Xmau_RS15095	GCF_002632685.1	VRR-NUC domain-containing protein	VRR_NUC+TM+TM	Xenorhabdus mauleonii	Bacteria; Proteobacteria; Gammaproteobacteria; Enterobacterales; Morganellaceae; Xenorhabdus
NZ_NITY01000012.1	103376	104923	WP_092511335.1	Xmau_RS15130	GCF_002632685.1	VRR-NUC domain-containing protein	VRR_NUC+TM+TM	Xenorhabdus mauleonii	Bacteria; Proteobacteria; Gammaproteobacteria; Enterobacterales; Morganellaceae; Xenorhabdus
NZ_FNKV01000001.1	3219200	3220069	WP_093381825.1	BLR26_RS14845	GCF_900101695.1	VRR-NUC domain protein		Pseudomonas sp. UC 17F4	Bacteria; Proteobacteria; Gammaproteobacteria; Pseudomonadales; Pseudomonadaceae; Pseudomonas
NZ_NEVP01000013.1	3627	4373	WP_094803955.1	CAL25_RS21775	GCF_002261315.1	VRR-NUC domain-containing protein	VRR_NUC	Bordetella genomosp. 5	Bacteria; Proteobacteria; Betaproteobacteria; Burkholderiales; Alcaligenaceae; Bordetella
NZ_NMRS01000008.1	2034	2732	WP_094954117.1	CGU39_RS06345	GCF_002263645.1	VRR-NUC domain-containing protein	VRR_NUC	Pseudomonas aeruginosa	Bacteria; Proteobacteria; Gammaproteobacteria; Pseudomonadales; Pseudomonadaceae; Pseudomonas
NZ_FYDQ01000001.1	890205	891074	WP_095161821.1	CKW27_RS04080	GCF_900187625.1	VRR-NUC domain protein		Pseudomonas sp. Irchel 3F5	Bacteria; Proteobacteria; Gammaproteobacteria; Pseudomonadales; Pseudomonadaceae; Pseudomonas
NZ_LT906434.1	1332040	1333494	WP_095197853.1	CKV66_RS06240	GCF_900187305.1	VRR-NUC domain-containing protein	VRR_NUC+TM	Neisseria zoodegmatis	Bacteria; Proteobacteria; Betaproteobacteria; Neisseriales; Neisseriaceae; Neisseria
NZ_LT906434.1	2380781	2382235	WP_095197890.1	CKV66_RS11255	GCF_900187305.1	VRR-NUC domain-containing protein	VRR_NUC+TM	Neisseria zoodegmatis	Bacteria; Proteobacteria; Betaproteobacteria; Neisseriales; Neisseriaceae; Neisseria
NZ_NQMZ01000056.1	38445	39215	WP_095404196.1	CJO69_RS30710	GCF_002276065.1	nuclease	VRR_NUC	Burkholderia ubonensis	Bacteria; Proteobacteria; Betaproteobacteria; Burkholderiales; Burkholderiaceae; Burkholderia; Burkholderia cepacia complex
NZ_NQMX01000005.1	105202	106467	WP_095412503.1	CJO71_RS06920	GCF_002276075.1	VRR-NUC domain-containing protein	VRR_NUC+TM+TM	Burkholderia ubonensis	Bacteria; Proteobacteria; Betaproteobacteria; Burkholderiales; Burkholderiaceae; Burkholderia; Burkholderia cepacia complex
NZ_NQNB01000045.1	254445	255215	WP_095412164.1	CJO67_RS30695	GCF_002276105.1	nuclease	VRR_NUC	Burkholderia ubonensis	Bacteria; Proteobacteria; Betaproteobacteria; Burkholderiales; Burkholderiaceae; Burkholderia; Burkholderia cepacia complex
NZ_NRFL01000013.1	623	1591	WP_095558263.1	CJU40_RS20985	GCF_002285345.1	VRR-NUC domain-containing protein	VRR_NUC	Pseudomonas aeruginosa	Bacteria; Proteobacteria; Gammaproteobacteria; Pseudomonadales; Pseudomonadaceae; Pseudomonas
NZ_MUNM01000053.1	590	1879	WP_095632954.1	BZL43_RS14575	GCF_002286815.1	VRR-NUC domain-containing protein	VRR_NUC+TM+TM	Pseudomonas sp. PICF141	Bacteria; Proteobacteria; Gammaproteobacteria; Pseudomonadales; Pseudomonadaceae; Pseudomonas
NZ_CP014137.1	5250413	5251741	WP_095835612.1	AWC36_RS23400	GCF_002291445.1	VRR-NUC domain-containing protein	VRR_NUC	Brenneria goodwinii	Bacteria; Proteobacteria; Gammaproteobacteria; Enterobacterales; Pectobacteriaceae; Brenneria
NZ_MAEN01000001.1	501424	502686	WP_095921565.1	C0635_RS02570	GCF_002303785.1	VRR-NUC domain-containing protein	VRR_NUC+TM+TM	Rahnella victoriana	Bacteria; Proteobacteria; Gammaproteobacteria; Enterobacterales; Yersiniaceae; Rahnella
NZ_MWXY01000014.1	170654	171352	WP_096069642.1	B8B88_RS22970	GCF_002312275.1	VRR-NUC domain-containing protein	VRR_NUC	Pseudomonas aeruginosa	Bacteria; Proteobacteria; Gammaproteobacteria; Pseudomonadales; Pseudomonadaceae; Pseudomonas
NZ_NQXZ01000047.1	204	929	WP_096102523.1	CCL09_RS13915	GCF_002318645.1	VRR-NUC domain-containing protein	VRR_NUC	Pseudomonas congelans	Bacteria; Proteobacteria; Gammaproteobacteria; Pseudomonadales; Pseudomonadaceae; Pseudomonas
NZ_CP023422.1	2084680	2085396	WP_096234458.1	CNX70_RS09240	GCF_002327145.1	VRR-NUC domain-containing protein	VRR_NUC	Janthinobacterium svalbardensis	Bacteria; Proteobacteria; Betaproteobacteria; Burkholderiales; Oxalobacteraceae; Janthinobacterium
NZ_CP023422.1	4216104	4216778	WP_096238545.1	CNX70_RS18595	GCF_002327145.1	VRR-NUC domain-containing protein	VRR_NUC	Janthinobacterium svalbardensis	Bacteria; Proteobacteria; Betaproteobacteria; Burkholderiales; Oxalobacteraceae; Janthinobacterium
NZ_NQYY01000028.1	28485	29186	WP_096253234.1	CJU34_RS25655	GCF_002325925.1	VRR-NUC domain-containing protein	VRR_NUC+TM	Pseudomonas aeruginosa	Bacteria; Proteobacteria; Gammaproteobacteria; Pseudomonadales; Pseudomonadaceae; Pseudomonas
NZ_CM001490.1	391429	392109	WP_096375947.1	PCHLO6_RS31370	GCF_000264555.1	VRR-NUC domain-containing protein	VRR_NUC	Pseudomonas chlororaphis O6	Bacteria; Proteobacteria; Gammaproteobacteria; Pseudomonadales; Pseudomonadaceae; Pseudomonas
NZ_AP014623.1	2778297	2778998	WP_096373987.1	PCAU_RS12920	GCF_002355875.1	VRR-NUC domain-containing protein	VRR_NUC+TM	Pseudomonas chlororaphis subsp. aurantiaca	Bacteria; Proteobacteria; Gammaproteobacteria; Pseudomonadales; Pseudomonadaceae; Pseudomonas
NZ_AP018111.1	1610371	1611636	WP_096471676.1	BSFP_RS07375	GCF_002356275.1	VRR-NUC domain-containing protein	TM+TM	Burkholderia stabilis	Bacteria; Proteobacteria; Betaproteobacteria; Burkholderiales; Burkholderiaceae; Burkholderia; Burkholderia cepacia complex
NZ_NWSG01000006.1	40742	42001	WP_096501614.1	CN645_RS08030	GCF_002355095.1	VRR-NUC domain-containing protein	VRR_NUC+TM+TM	Burkholderia sp. IDO3	Bacteria; Proteobacteria; Betaproteobacteria; Burkholderiales; Burkholderiaceae; Burkholderia
NZ_NWSG01000006.1	43581	44840	WP_096501618.1	CN645_RS08040	GCF_002355095.1	VRR-NUC domain-containing protein	VRR_NUC+TM+TM	Burkholderia sp. IDO3	Bacteria; Proteobacteria; Betaproteobacteria; Burkholderiales; Burkholderiaceae; Burkholderia
NZ_CP023505.1	146275	147720	WP_096746746.1	CO693_RS00680	GCF_002386305.1	VRR-NUC domain-containing protein	VRR_NUC+TM+TM	Morganella morganii	Bacteria; Proteobacteria; Gammaproteobacteria; Enterobacterales; Morganellaceae; Morganella
NZ_CP023505.1	2209937	2211454	WP_096747353.1	CO693_RS11035	GCF_002386305.1	VRR-NUC domain-containing protein	VRR_NUC+TM+TM	Morganella morganii	Bacteria; Proteobacteria; Gammaproteobacteria; Enterobacterales; Morganellaceae; Morganella
NZ_CP023523.1	507598	508860	WP_096752852.1	CO712_RS21425	GCF_002393425.1	VRR-NUC domain-containing protein	VRR_NUC+TM+TM	Burkholderia gladioli pv. gladioli	Bacteria; Proteobacteria; Betaproteobacteria; Burkholderiales; Burkholderiaceae; Burkholderia
NZ_NXDM01000025.1	125951	127456	WP_096764167.1	CPT34_RS23455	GCF_002406495.1	DUF4150 domain-containing protein	Tox-PAAR-like	Rhizobium sophoriradicis	Bacteria; Proteobacteria; Alphaproteobacteria; Hyphomicrobiales; Rhizobiaceae; Rhizobium/Agrobacterium group; Rhizobium
NZ_CP022656.1	736553	737308	WP_096913765.1	CHL79_RS03165	GCF_002443055.1	hypothetical protein		Delftia acidovorans	Bacteria; Proteobacteria; Betaproteobacteria; Burkholderiales; Comamonadaceae; Delftia
NZ_CP022656.1	2525952	2526707	WP_096914567.1	CHL79_RS11205	GCF_002443055.1	hypothetical protein		Delftia acidovorans	Bacteria; Proteobacteria; Betaproteobacteria; Burkholderiales; Comamonadaceae; Delftia
NZ_NJZB01000032.1	2522	3805	WP_096903455.1	BGJ65_RS19395	GCF_002459925.1	VRR-NUC domain-containing protein	VRR_NUC+TM+TM	Escherichia coli	Bacteria; Proteobacteria; Gammaproteobacteria; Enterobacterales; Enterobacteriaceae; Escherichia
NZ_NJMR01000036.1	20424	21713	WP_096970667.1	BSJ08_RS21115	GCF_002466555.1	VRR-NUC domain-containing protein	VRR_NUC+TM+TM	Escherichia coli	Bacteria; Proteobacteria; Gammaproteobacteria; Enterobacterales; Enterobacteriaceae; Escherichia
NZ_NMLE01000103.1	1841	3130	WP_096998586.1	A7265_RS24925	GCF_002468575.1	VRR-NUC domain-containing protein	VRR_NUC+TM+TM	Escherichia coli	Bacteria; Proteobacteria; Gammaproteobacteria; Enterobacterales; Enterobacteriaceae; Escherichia
NZ_OCMW01000001.1	6743621	6744550	WP_097200379.1	CRP32_RS31570	GCF_900215425.1	DUF4150 domain-containing protein	Tox-PAAR-like+VRR_NUC	Variovorax sp. YR752	Bacteria; Proteobacteria; Betaproteobacteria; Burkholderiales; Comamonadaceae; Variovorax
NZ_NOHK01000055.1	11004	12293	WP_097316245.1	AS984_RS25780	GCF_002475255.1	VRR-NUC domain-containing protein	VRR_NUC+TM+TM	Escherichia coli	Bacteria; Proteobacteria; Gammaproteobacteria; Enterobacterales; Enterobacteriaceae; Escherichia
NZ_NOSY01000031.1	16813	18102	WP_097505294.1	A7284_RS21785	GCF_002521345.1	VRR-NUC domain-containing protein	VRR_NUC+TM+TM	Escherichia coli	Bacteria; Proteobacteria; Gammaproteobacteria; Enterobacterales; Enterobacteriaceae; Escherichia
NZ_NOSO01000022.1	27418	28707	WP_097513103.1	A7295_RS22985	GCF_002522105.1	VRR-NUC domain-containing protein	VRR_NUC+TM+TM	Escherichia coli	Bacteria; Proteobacteria; Gammaproteobacteria; Enterobacterales; Enterobacteriaceae; Escherichia
NZ_NITD01000001.1	1235276	1236577	WP_097577927.1	IMT19_RS05850	GCF_002532235.1	VRR-NUC domain-containing protein	VRR_NUC+TM+TM	Cronobacter sakazakii	Bacteria; Proteobacteria; Gammaproteobacteria; Enterobacterales; Enterobacteriaceae; Cronobacter
NZ_NITF01000007.1	241850	243112	WP_097569917.1	IMT21_RS05830	GCF_002532315.1	VRR-NUC domain-containing protein	VRR_NUC	Cronobacter sakazakii	Bacteria; Proteobacteria; Gammaproteobacteria; Enterobacterales; Enterobacteriaceae; Cronobacter
NZ_NITF01000015.1	104453	105754	WP_097571095.1	IMT21_RS18260	GCF_002532315.1	VRR-NUC domain-containing protein	VRR_NUC+TM+TM	Cronobacter sakazakii	Bacteria; Proteobacteria; Gammaproteobacteria; Enterobacterales; Enterobacteriaceae; Cronobacter
NZ_NITG01000003.1	246749	247333	WP_097583207.1	IMT22_RS07925	GCF_002532355.1	hypothetical protein	TM+TM	Cronobacter sakazakii	Bacteria; Proteobacteria; Gammaproteobacteria; Enterobacterales; Enterobacteriaceae; Cronobacter
NZ_NITC01000012.1	11281	12582	WP_097640849.1	IMT18_RS15040	GCF_002532205.1	VRR-NUC domain-containing protein	VRR_NUC+TM+TM	Cronobacter sakazakii	Bacteria; Proteobacteria; Gammaproteobacteria; Enterobacterales; Enterobacteriaceae; Cronobacter
NZ_NITR01000032.1	37009	38310	WP_097604644.1	CDT93_RS10955	GCF_002532465.1	VRR-NUC domain-containing protein	VRR_NUC+TM+TM	Cronobacter sakazakii	Bacteria; Proteobacteria; Gammaproteobacteria; Enterobacterales; Enterobacteriaceae; Cronobacter
NZ_NITJ01000006.1	379986	381248	WP_097650046.1	IMT24_RS17165	GCF_002532395.1	VRR-NUC domain-containing protein	VRR_NUC	Cronobacter sakazakii	Bacteria; Proteobacteria; Gammaproteobacteria; Enterobacterales; Enterobacteriaceae; Cronobacter
NZ_PDDY01000004.1	4549546	4550253	WP_098154682.1	CRM94_RS38065	GCF_002554225.1	VRR-NUC domain-containing protein	VRR_NUC	Burkholderia gladioli	Bacteria; Proteobacteria; Betaproteobacteria; Burkholderiales; Burkholderiaceae; Burkholderia
NZ_PDDZ01000002.1	2995084	2995788	WP_098181639.1	CRM95_RS13840	GCF_002554395.1	VRR-NUC domain-containing protein	VRR_NUC	Burkholderia gladioli	Bacteria; Proteobacteria; Betaproteobacteria; Burkholderiales; Burkholderiaceae; Burkholderia
NZ_CADEWA010000001.1	659191	660522	WP_098182882.1	H9C93_RS02685	GCF_902831005.1	VRR-NUC domain-containing protein	VRR_NUC+TM+TM+TM	Burkholderia gladioli	Bacteria; Proteobacteria; Betaproteobacteria; Burkholderiales; Burkholderiaceae; Burkholderia
NZ_CP023969.1	5504465	5505343	WP_098951810.1	CRN80_RS25615	GCF_002591235.1	VRR-NUC domain protein	VRR_NUC	Pseudomonas sp. FDAARGOS_380	Bacteria; Proteobacteria; Gammaproteobacteria; Pseudomonadales; Pseudomonadaceae; Pseudomonas
NZ_CP023969.1	5506913	5507791	WP_098951812.1	CRN80_RS25625	GCF_002591235.1	VRR-NUC domain protein		Pseudomonas sp. FDAARGOS_380	Bacteria; Proteobacteria; Gammaproteobacteria; Pseudomonadales; Pseudomonadaceae; Pseudomonas
NZ_CP023969.1	5509361	5510239	WP_098951816.1	CRN80_RS25635	GCF_002591235.1	VRR-NUC domain protein		Pseudomonas sp. FDAARGOS_380	Bacteria; Proteobacteria; Gammaproteobacteria; Pseudomonadales; Pseudomonadaceae; Pseudomonas
NZ_NIUA01000001.1	2727289	2728656	WP_099138493.1	Xszus_RS11720	GCF_002632595.1	VRR-NUC domain-containing protein	VRR_NUC	Xenorhabdus szentirmaii	Bacteria; Proteobacteria; Gammaproteobacteria; Enterobacterales; Morganellaceae; Xenorhabdus
NZ_NJCX01000044.1	6787	8304	WP_099143391.1	Xkoz_RS18320	GCF_002632875.1	VRR-NUC domain-containing protein	VRR_NUC+TM+TM	Xenorhabdus kozodoii	Bacteria; Proteobacteria; Gammaproteobacteria; Enterobacterales; Morganellaceae; Xenorhabdus
NZ_AMQT02000035.1	64129	64884	WP_100556294.1	Y5A_RS18465	GCF_000300395.2	VRR-NUC domain-containing protein	VRR_NUC	Burkholderia glumae AU6208	Bacteria; Proteobacteria; Betaproteobacteria; Burkholderiales; Burkholderiaceae; Burkholderia
NZ_AMQT02000084.1	5137	5841	WP_100556625.1	Y5A_RS26220	GCF_000300395.2	VRR-NUC domain-containing protein	VRR_NUC	Burkholderia glumae AU6208	Bacteria; Proteobacteria; Betaproteobacteria; Burkholderiales; Burkholderiaceae; Burkholderia
NZ_AMQT02000084.1	9532	10302	WP_100556629.1	Y5A_RS26250	GCF_000300395.2	VRR-NUC domain-containing protein	VRR_NUC	Burkholderia glumae AU6208	Bacteria; Proteobacteria; Betaproteobacteria; Burkholderiales; Burkholderiaceae; Burkholderia
NZ_CP018259.1	338629	339600	WP_100884383.1	BSR55_RS01545	GCF_002813045.1	hypothetical protein	TM	Acinetobacter bereziniae	Bacteria; Proteobacteria; Gammaproteobacteria; Moraxellales; Moraxellaceae; Acinetobacter
NZ_CP018259.1	547355	548092	WP_100884456.1	BSR55_RS02590	GCF_002813045.1	VRR-NUC domain-containing protein	VRR_NUC	Acinetobacter bereziniae	Bacteria; Proteobacteria; Gammaproteobacteria; Moraxellales; Moraxellaceae; Acinetobacter
NZ_CP018259.1	1011158	1012132	WP_100884627.1	BSR55_RS04690	GCF_002813045.1	hypothetical protein	TM	Acinetobacter bereziniae	Bacteria; Proteobacteria; Gammaproteobacteria; Moraxellales; Moraxellaceae; Acinetobacter
NZ_CP018259.1	3666614	3667327	WP_100885882.1	BSR55_RS17200	GCF_002813045.1	VRR-NUC domain-containing protein	VRR_NUC	Acinetobacter bereziniae	Bacteria; Proteobacteria; Gammaproteobacteria; Moraxellales; Moraxellaceae; Acinetobacter
NZ_PITQ01000010.1	87651	88967	WP_101079079.1	CWS43_RS21090	GCF_002834385.1	hypothetical protein		Rahnella sp. AA	Bacteria; Proteobacteria; Gammaproteobacteria; Enterobacterales; Yersiniaceae; Rahnella; unclassified Rahnella
NZ_CP025309.1	2864910	2865611	WP_101282323.1	CXP47_RS13005	GCF_002844145.1	VRR-NUC domain-containing protein	VRR_NUC+TM	Pseudomonas chlororaphis	Bacteria; Proteobacteria; Gammaproteobacteria; Pseudomonadales; Pseudomonadaceae; Pseudomonas
NZ_KZ559401.1	368930	370219	WP_101700228.1	B9P82_RS09180	GCF_002850715.1	VRR-NUC domain-containing protein	VRR_NUC+TM+TM	Citrobacter sp. L55	Bacteria; Proteobacteria; Gammaproteobacteria; Enterobacterales; Enterobacteriaceae; Citrobacter; unclassified Citrobacter
NZ_KZ559433.1	3117	4412	WP_101701411.1	B9P82_RS27435	GCF_002850715.1	VRR-NUC domain-containing protein	VRR_NUC+TM+TM	Citrobacter sp. L55	Bacteria; Proteobacteria; Gammaproteobacteria; Enterobacterales; Enterobacteriaceae; Citrobacter; unclassified Citrobacter
NZ_PKJP01000010.1	22518	24077	WP_101756358.1	CYJ99_RS10560	GCF_002847985.1	hypothetical protein	TM	Neisseria perflava	Bacteria; Proteobacteria; Betaproteobacteria; Neisseriales; Neisseriaceae; Neisseria
NZ_PKJO01000003.1	11259	12818	WP_101809939.1	CYK00_RS03210	GCF_002863285.1	hypothetical protein	TM	Neisseria sicca	Bacteria; Proteobacteria; Betaproteobacteria; Neisseriales; Neisseriaceae; Neisseria
NZ_CP019091.1	1267781	1268476	WP_101837902.1	BVV20_RS06340	GCF_002850175.1	VRR-NUC domain-containing protein	VRR_NUC	Xanthomonas oryzae pv. oryzae	Bacteria; Proteobacteria; Gammaproteobacteria; Xanthomonadales; Xanthomonadaceae; Xanthomonas
NZ_PHSN01000017.1	142087	143040	WP_102225768.1	CVV76_RS16430	GCF_002871005.1	DUF4150 domain-containing protein	Tox-PAAR-like+VRR_NUC+TM	Acidimangrovimonas sediminis	Bacteria; Proteobacteria; Alphaproteobacteria; Rhodobacterales; Rhodobacteraceae; Acidimangrovimonas
NZ_PNYB01000003.1	252625	253335	WP_102608753.1	C0Z19_RS05355	GCF_002879855.1	VRR-NUC domain-containing protein	VRR_NUC	Trinickia soli	Bacteria; Proteobacteria; Betaproteobacteria; Burkholderiales; Burkholderiaceae; Trinickia
NZ_PNYB01000022.1	3658	4392	WP_102611862.1	C0Z19_RS21475	GCF_002879855.1	VRR-NUC domain-containing protein	VRR_NUC	Trinickia soli	Bacteria; Proteobacteria; Betaproteobacteria; Burkholderiales; Burkholderiaceae; Trinickia
NZ_PNYA01000002.1	21002	21706	WP_102643721.1	C0Z18_RS02070	GCF_002879885.1	VRR-NUC domain-containing protein	VRR_NUC	Trinickia dabaoshanensis	Bacteria; Proteobacteria; Betaproteobacteria; Burkholderiales; Burkholderiaceae; Trinickia
NZ_CM003626.1	2323675	2324370	WP_102812082.1	WS76_RS10615	GCF_001462435.1	VRR-NUC domain-containing protein	VRR_NUC	Burkholderia humptydooensis	Bacteria; Proteobacteria; Betaproteobacteria; Burkholderiales; Burkholderiaceae; Burkholderia; pseudomallei group
NZ_JAUP01000028.1	34188	34922	WP_102810608.1	AHE96_RS01830	GCF_002887885.1	VRR-NUC domain-containing protein	VRR_NUC	Burkholderia pseudomallei MSHR139	Bacteria; Proteobacteria; Betaproteobacteria; Burkholderiales; Burkholderiaceae; Burkholderia; pseudomallei group
NZ_PPSA01000064.1	1965	2843	WP_103387447.1	C1891_RS28710	GCF_002901495.1	VRR-NUC domain-containing protein	VRR_NUC	Pseudomonas sp. FW104-15G4B	Bacteria; Proteobacteria; Gammaproteobacteria; Pseudomonadales; Pseudomonadaceae; Pseudomonas
NZ_PPTF01000006.1	48795	49973	WP_103316968.1	C2134_RS01510	GCF_002902845.1	VRR-NUC domain-containing protein	VRR_NUC+TM+TM	Chromobacterium sp. MWU13-2610	Bacteria; Proteobacteria; Betaproteobacteria; Neisseriales; Chromobacteriaceae; Chromobacterium; unclassified Chromobacterium
NZ_NXEJ01000012.1	121592	122713	WP_103660187.1	CPJ18_RS23300	GCF_002915175.1	DUF4150 domain-containing protein	Tox-PAAR-like	Agrobacterium rosae	Bacteria; Proteobacteria; Alphaproteobacteria; Hyphomicrobiales; Rhizobiaceae; Rhizobium/Agrobacterium group; Agrobacterium
NZ_PQII01000004.1	107554	108258	WP_103690533.1	C3Y08_RS03770	GCF_002917905.1	VRR-NUC domain-containing protein	VRR_NUC	Burkholderia gladioli	Bacteria; Proteobacteria; Betaproteobacteria; Burkholderiales; Burkholderiaceae; Burkholderia
NZ_PQII01000004.1	284975	285718	WP_103690585.1	C3Y08_RS04595	GCF_002917905.1	VRR-NUC domain-containing protein	DUF4776+VRR_NUC	Burkholderia gladioli	Bacteria; Proteobacteria; Betaproteobacteria; Burkholderiales; Burkholderiaceae; Burkholderia
NZ_PQII01000005.1	197673	198155	WP_103690799.1	C3Y08_RS07115	GCF_002917905.1	VRR-NUC domain-containing protein	VRR_NUC	Burkholderia gladioli	Bacteria; Proteobacteria; Betaproteobacteria; Burkholderiales; Burkholderiaceae; Burkholderia
NZ_CP065036.1	3249372	3250721	WP_103808704.1	PB20LOC_RS14745	GCF_002920045.2	VRR-NUC domain-containing protein	VRR_NUC+TM+TM	Pectobacterium parmentieri	Bacteria; Proteobacteria; Gammaproteobacteria; Enterobacterales; Pectobacteriaceae; Pectobacterium
NZ_CP065036.1	3251995	3253344	WP_121247179.1	PB20LOC_RS14755	GCF_002920045.2	VRR-NUC domain-containing protein	VRR_NUC+TM+TM	Pectobacterium parmentieri	Bacteria; Proteobacteria; Gammaproteobacteria; Enterobacterales; Pectobacteriaceae; Pectobacterium
NZ_LFZP01000069.1	15759	17054	WP_104013421.1	C5F75_RS34660	GCF_002925705.1	VRR-NUC domain-containing protein	VRR_NUC+TM+TM	Burkholderia anthina	Bacteria; Proteobacteria; Betaproteobacteria; Burkholderiales; Burkholderiaceae; Burkholderia; Burkholderia cepacia complex
NZ_PREU01000021.1	69870	70706	WP_104145834.1	C4E15_RS29255	GCF_002926155.1	VRR-NUC domain-containing protein	SP+VRR_NUC	Achromobacter spanius	Bacteria; Proteobacteria; Betaproteobacteria; Burkholderiales; Alcaligenaceae; Achromobacter
NZ_PREU01000021.1	73726	74565	WP_104145837.1	C4E15_RS29270	GCF_002926155.1	VRR-NUC domain-containing protein	SP+VRR_NUC	Achromobacter spanius	Bacteria; Proteobacteria; Betaproteobacteria; Burkholderiales; Alcaligenaceae; Achromobacter
NZ_NQXJ01000010.1	88738	89736	WP_104080436.1	ApiMCR8900_RS15430	GCF_002928115.1	hypothetical protein	RE_Bpu10I+VRR_NUC	Acinetobacter pittii	Bacteria; Proteobacteria; Gammaproteobacteria; Moraxellales; Moraxellaceae; Acinetobacter; Acinetobacter calcoaceticus/baumannii complex
NZ_PTOU01000005.1	11332	12633	WP_104672628.1	C3D77_RS03535	GCF_002942145.1	VRR-NUC domain-containing protein	VRR_NUC+TM+TM	Cronobacter sakazakii	Bacteria; Proteobacteria; Gammaproteobacteria; Enterobacterales; Enterobacteriaceae; Cronobacter
NZ_PTPA01000015.1	136203	137465	WP_104671691.1	C3D72_RS07865	GCF_002942185.1	VRR-NUC domain-containing protein	VRR_NUC	Cronobacter sakazakii	Bacteria; Proteobacteria; Gammaproteobacteria; Enterobacterales; Enterobacteriaceae; Cronobacter
NZ_PTPC01000004.1	822394	823695	WP_104672955.1	C3D65_RS11515	GCF_002942405.1	VRR-NUC domain-containing protein	VRR_NUC+TM+TM	Cronobacter sakazakii	Bacteria; Proteobacteria; Gammaproteobacteria; Enterobacterales; Enterobacteriaceae; Cronobacter
NZ_PTPC01000007.1	415868	417130	WP_104672759.1	C3D65_RS17280	GCF_002942405.1	VRR-NUC domain-containing protein	VRR_NUC	Cronobacter sakazakii	Bacteria; Proteobacteria; Gammaproteobacteria; Enterobacterales; Enterobacteriaceae; Cronobacter
NZ_PUBX01000021.1	95242	95598	WP_104918444.1	C5U38_RS21115	GCF_002951525.1	hypothetical protein		Escherichia fergusonii	Bacteria; Proteobacteria; Gammaproteobacteria; Enterobacterales; Enterobacteriaceae; Escherichia
NZ_CP024620.2	2758694	2759698	WP_104989165.1	CTZ23_RS13395	GCF_002953575.2	hypothetical protein	VRR_NUC	Acinetobacter indicus	Bacteria; Proteobacteria; Gammaproteobacteria; Moraxellales; Moraxellaceae; Acinetobacter
NZ_CP023269.1	2556013	2556714	WP_105226577.1	CLM72_RS11935	GCF_002966775.1	VRR-NUC domain-containing protein	VRR_NUC+TM	Pseudomonas sp. MYb193	Bacteria; Proteobacteria; Gammaproteobacteria; Pseudomonadales; Pseudomonadaceae; Pseudomonas
NZ_CP023270.1	5570830	5572053	WP_158685931.1	CLM73_RS25205	GCF_002966795.1	hypothetical protein	VRR_NUC	Achromobacter spanius	Bacteria; Proteobacteria; Betaproteobacteria; Burkholderiales; Alcaligenaceae; Achromobacter
NZ_CP023270.1	5573318	5574646	WP_105240751.1	CLM73_RS25215	GCF_002966795.1	VRR-NUC domain-containing protein	VRR_NUC	Achromobacter spanius	Bacteria; Proteobacteria; Betaproteobacteria; Burkholderiales; Alcaligenaceae; Achromobacter
NZ_CP023270.1	5576004	5577239	WP_158685933.1	CLM73_RS25225	GCF_002966795.1	VRR-NUC domain-containing protein	VRR_NUC	Achromobacter spanius	Bacteria; Proteobacteria; Betaproteobacteria; Burkholderiales; Alcaligenaceae; Achromobacter
NZ_PTRK01000011.1	89877	91160	WP_105286192.1	C3D32_RS17295	GCF_002965985.1	VRR-NUC domain-containing protein	VRR_NUC+TM+TM	Escherichia sp. MOD1-EC5434	Bacteria; Proteobacteria; Gammaproteobacteria; Enterobacterales; Enterobacteriaceae; Escherichia
NZ_CP027177.1	316709	317869	WP_105369848.1	CSB69_RS01420	GCF_002968775.1	VRR-NUC domain-containing protein	VRR_NUC+TM+TM	Morganella morganii	Bacteria; Proteobacteria; Gammaproteobacteria; Enterobacterales; Morganellaceae; Morganella
NZ_PUWT01000048.1	37071	38429	WP_105396127.1	C6H66_RS16435	GCF_002968995.1	VRR-NUC domain-containing protein	VRR_NUC+TM+TM	Photorhabdus luminescens	Bacteria; Proteobacteria; Gammaproteobacteria; Enterobacterales; Morganellaceae; Photorhabdus
NZ_PUWV01000013.1	96057	97415	WP_105398157.1	C6H64_RS09205	GCF_002969005.1	VRR-NUC domain-containing protein	VRR_NUC+TM+TM	Photorhabdus luminescens	Bacteria; Proteobacteria; Gammaproteobacteria; Enterobacterales; Morganellaceae; Photorhabdus
NZ_PUWV01000053.1	491	1849	WP_105399432.1	C6H64_RS20040	GCF_002969005.1	VRR-NUC domain-containing protein	VRR_NUC+TM+TM	Photorhabdus luminescens	Bacteria; Proteobacteria; Gammaproteobacteria; Enterobacterales; Morganellaceae; Photorhabdus
NZ_PUWV01000067.1	16808	18163	WP_105399625.1	C6H64_RS21700	GCF_002969005.1	VRR-NUC domain-containing protein	VRR_NUC+TM+TM	Photorhabdus luminescens	Bacteria; Proteobacteria; Gammaproteobacteria; Enterobacterales; Morganellaceae; Photorhabdus
NZ_PUWV01000104.1	2739	4100	WP_105399819.1	C6H64_RS23380	GCF_002969005.1	VRR-NUC domain-containing protein	VRR_NUC+TM+TM	Photorhabdus luminescens	Bacteria; Proteobacteria; Gammaproteobacteria; Enterobacterales; Morganellaceae; Photorhabdus
NZ_JZNU01000012.1	549	1838	WP_105457693.1	VE45_RS03050	GCF_002971855.1	VRR-NUC domain-containing protein	VRR_NUC+TM+TM	Escherichia coli	Bacteria; Proteobacteria; Gammaproteobacteria; Enterobacterales; Enterobacteriaceae; Escherichia
NZ_JZQB01000101.1	15150	16439	WP_105494295.1	VH99_RS10505	GCF_002972795.1	VRR-NUC domain-containing protein	VRR_NUC+TM+TM	Escherichia coli	Bacteria; Proteobacteria; Gammaproteobacteria; Enterobacterales; Enterobacteriaceae; Escherichia
NZ_PVEN01000002.1	595734	596471	WP_105507085.1	B0G83_RS09040	GCF_002973525.1	VRR-NUC domain-containing protein	VRR_NUC	Paraburkholderia sp. BL21I4N1	Bacteria; Proteobacteria; Betaproteobacteria; Burkholderiales; Burkholderiaceae; Paraburkholderia
NZ_PVEN01000006.1	1182	2432	WP_105508539.1	B0G83_RS16885	GCF_002973525.1	VRR-NUC domain-containing protein	VRR_NUC+TM+TM	Paraburkholderia sp. BL21I4N1	Bacteria; Proteobacteria; Betaproteobacteria; Burkholderiales; Burkholderiaceae; Paraburkholderia
NZ_PVEN01000008.1	110293	111033	WP_105509353.1	B0G83_RS21100	GCF_002973525.1	VRR-NUC domain-containing protein	VRR_NUC	Paraburkholderia sp. BL21I4N1	Bacteria; Proteobacteria; Betaproteobacteria; Burkholderiales; Burkholderiaceae; Paraburkholderia
NZ_PVBW01000001.1	180160	181461	WP_105503691.1	C5973_RS00825	GCF_002974375.1	VRR-NUC domain-containing protein	VRR_NUC+TM+TM	Cronobacter sakazakii	Bacteria; Proteobacteria; Gammaproteobacteria; Enterobacterales; Enterobacteriaceae; Cronobacter
NZ_PVCT01000010.1	16422	17684	WP_105546767.1	C5964_RS06625	GCF_002974695.1	VRR-NUC domain-containing protein	VRR_NUC	Cronobacter sakazakii	Bacteria; Proteobacteria; Gammaproteobacteria; Enterobacterales; Enterobacteriaceae; Cronobacter
NZ_PVDI01000004.1	254517	255818	WP_105536734.1	C5960_RS05935	GCF_002974985.1	VRR-NUC domain-containing protein	VRR_NUC+TM	Cronobacter sakazakii	Bacteria; Proteobacteria; Gammaproteobacteria; Enterobacterales; Enterobacteriaceae; Cronobacter
NZ_NRJN01000003.1	533	1795	WP_105571011.1	CI847_RS05430	GCF_002976595.1	VRR-NUC domain-containing protein	VRR_NUC	Cronobacter sakazakii	Bacteria; Proteobacteria; Gammaproteobacteria; Enterobacterales; Enterobacteriaceae; Cronobacter
NZ_NRJN01000020.1	42129	43430	WP_105571576.1	CI847_RS20305	GCF_002976595.1	VRR-NUC domain-containing protein	VRR_NUC+TM+TM	Cronobacter sakazakii	Bacteria; Proteobacteria; Gammaproteobacteria; Enterobacterales; Enterobacteriaceae; Cronobacter
NZ_NRJP01000003.1	299017	300279	WP_105546366.1	CI845_RS12645	GCF_002976615.1	VRR-NUC domain-containing protein	VRR_NUC	Cronobacter sakazakii	Bacteria; Proteobacteria; Gammaproteobacteria; Enterobacterales; Enterobacteriaceae; Cronobacter
NZ_NRJQ01000003.1	26921	28222	WP_105573195.1	CI844_RS04680	GCF_002976635.1	VRR-NUC domain-containing protein	VRR_NUC+TM+TM	Cronobacter sakazakii	Bacteria; Proteobacteria; Gammaproteobacteria; Enterobacterales; Enterobacteriaceae; Cronobacter
NZ_NRJV01000029.1	58017	59279	WP_105576453.1	CI838_RS12925	GCF_002976775.1	VRR-NUC domain-containing protein	VRR_NUC	Cronobacter sakazakii	Bacteria; Proteobacteria; Gammaproteobacteria; Enterobacterales; Enterobacteriaceae; Cronobacter
NZ_NRJY01000001.1	522506	523807	WP_105574553.1	CI835_RS02465	GCF_002976815.1	VRR-NUC domain-containing protein	VRR_NUC+TM+TM	Cronobacter sakazakii	Bacteria; Proteobacteria; Gammaproteobacteria; Enterobacterales; Enterobacteriaceae; Cronobacter
NZ_NRKA01000001.1	259959	261260	WP_105577098.1	CI833_RS01250	GCF_002976855.1	VRR-NUC domain-containing protein	VRR_NUC+TM+TM	Cronobacter sakazakii	Bacteria; Proteobacteria; Gammaproteobacteria; Enterobacterales; Enterobacteriaceae; Cronobacter
NZ_NRKL01000015.1	26900	28201	WP_105580383.1	CI821_RS19590	GCF_002977055.1	VRR-NUC domain-containing protein	VRR_NUC+TM+TM	Cronobacter sakazakii	Bacteria; Proteobacteria; Gammaproteobacteria; Enterobacterales; Enterobacteriaceae; Cronobacter
NZ_NRKN01000001.1	26914	28215	WP_105577759.1	CI818_RS00140	GCF_002977115.1	VRR-NUC domain-containing protein	VRR_NUC+TM+TM	Cronobacter sakazakii	Bacteria; Proteobacteria; Gammaproteobacteria; Enterobacterales; Enterobacteriaceae; Cronobacter
NZ_NRKV01000001.1	429698	430999	WP_105595881.1	CI810_RS02015	GCF_002977275.1	VRR-NUC domain-containing protein	VRR_NUC+TM+TM	Cronobacter sakazakii	Bacteria; Proteobacteria; Gammaproteobacteria; Enterobacterales; Enterobacteriaceae; Cronobacter
NZ_NRLC01000002.1	26691	27992	WP_105603340.1	CI938_RS02455	GCF_002977405.1	VRR-NUC domain-containing protein	VRR_NUC+TM+TM	Cronobacter sakazakii	Bacteria; Proteobacteria; Gammaproteobacteria; Enterobacterales; Enterobacteriaceae; Cronobacter
NZ_SIJE01000012.1	110484	111746	WP_105605053.1	EYS34_RS18225	GCF_006861635.1	VRR-NUC domain-containing protein	VRR_NUC	Cronobacter sakazakii	Bacteria; Proteobacteria; Gammaproteobacteria; Enterobacterales; Enterobacteriaceae; Cronobacter
NZ_NRKW01000003.1	383642	384904	WP_105619221.1	CI944_RS13025	GCF_002977295.1	VRR-NUC domain-containing protein	VRR_NUC	Cronobacter sakazakii	Bacteria; Proteobacteria; Gammaproteobacteria; Enterobacterales; Enterobacteriaceae; Cronobacter
NZ_NRLX01000003.1	347184	348446	WP_105609634.1	CI915_RS13535	GCF_002977835.1	VRR-NUC domain-containing protein	VRR_NUC	Cronobacter sakazakii	Bacteria; Proteobacteria; Gammaproteobacteria; Enterobacterales; Enterobacteriaceae; Cronobacter
NZ_NRMQ01000004.1	117325	118587	WP_105612426.1	CI894_RS11430	GCF_002978175.1	VRR-NUC domain-containing protein	VRR_NUC	Cronobacter malonaticus	Bacteria; Proteobacteria; Gammaproteobacteria; Enterobacterales; Enterobacteriaceae; Cronobacter
NZ_NRMW01000002.1	313363	314631	WP_105624319.1	CI887_RS12995	GCF_002978325.1	VRR-NUC domain-containing protein	VRR_NUC	Cronobacter malonaticus	Bacteria; Proteobacteria; Gammaproteobacteria; Enterobacterales; Enterobacteriaceae; Cronobacter
NZ_NRNL01000028.1	707	1969	WP_105630086.1	CI871_RS18655	GCF_002978545.1	VRR-NUC domain-containing protein	VRR_NUC	Cronobacter malonaticus	Bacteria; Proteobacteria; Gammaproteobacteria; Enterobacterales; Enterobacteriaceae; Cronobacter
NZ_NRNP01000001.1	520490	521791	WP_105639483.1	CI866_RS02445	GCF_002978615.1	VRR-NUC domain-containing protein	VRR_NUC+TM+TM	Cronobacter dublinensis	Bacteria; Proteobacteria; Gammaproteobacteria; Enterobacterales; Enterobacteriaceae; Cronobacter
NZ_NRNO01000006.1	126196	127458	WP_105637558.1	CI867_RS04310	GCF_002978625.1	VRR-NUC domain-containing protein	VRR_NUC	Cronobacter dublinensis	Bacteria; Proteobacteria; Gammaproteobacteria; Enterobacterales; Enterobacteriaceae; Cronobacter
NZ_NRNS01000007.1	2077	3339	WP_105630987.1	CI863_RS08700	GCF_002978705.2	VRR-NUC domain-containing protein	VRR_NUC	Cronobacter dublinensis	Bacteria; Proteobacteria; Gammaproteobacteria; Enterobacterales; Enterobacteriaceae; Cronobacter
NZ_NRNN01000002.1	235979	237241	WP_105685558.1	CI869_RS05315	GCF_002978555.1	VRR-NUC domain-containing protein	VRR_NUC	Cronobacter dublinensis	Bacteria; Proteobacteria; Gammaproteobacteria; Enterobacterales; Enterobacteriaceae; Cronobacter
NZ_NRNK01000006.1	103529	104797	WP_105653617.1	CI872_RS14660	GCF_002978565.1	VRR-NUC domain-containing protein	VRR_NUC	Cronobacter malonaticus	Bacteria; Proteobacteria; Gammaproteobacteria; Enterobacterales; Enterobacteriaceae; Cronobacter
NZ_NRNW01000003.1	227494	228756	WP_105667844.1	CI859_RS07540	GCF_002978775.1	VRR-NUC domain-containing protein	VRR_NUC	Cronobacter dublinensis	Bacteria; Proteobacteria; Gammaproteobacteria; Enterobacterales; Enterobacteriaceae; Cronobacter
NZ_NRNY01000003.1	10891	12192	WP_105665120.1	CI856_RS01585	GCF_002978795.1	VRR-NUC domain-containing protein	VRR_NUC+TM+TM	Cronobacter dublinensis	Bacteria; Proteobacteria; Gammaproteobacteria; Enterobacterales; Enterobacteriaceae; Cronobacter
NZ_PCQJ01000002.1	349919	351208	WP_105759560.1	CQ001_RS05965	GCF_002980095.1	VRR-NUC domain-containing protein	VRR_NUC+TM+TM	Erwinia billingiae	Bacteria; Proteobacteria; Gammaproteobacteria; Enterobacterales; Erwiniaceae; Erwinia
NZ_PVFL01000016.1	91124	91906	WP_105768785.1	C6P78_RS05755	GCF_002980775.1	nuclease	VRR_NUC	Burkholderia multivorans	Bacteria; Proteobacteria; Betaproteobacteria; Burkholderiales; Burkholderiaceae; Burkholderia; Burkholderia cepacia complex
NZ_PVFL01000071.1	110202	110969	WP_105769997.1	C6P78_RS20780	GCF_002980775.1	VRR-NUC domain-containing protein	VRR_NUC	Burkholderia multivorans	Bacteria; Proteobacteria; Betaproteobacteria; Burkholderiales; Burkholderiaceae; Burkholderia; Burkholderia cepacia complex
NZ_PVFO01000007.1	269728	270495	WP_105789614.1	C6P82_RS04555	GCF_002981075.1	VRR-NUC domain-containing protein	VRR_NUC	Burkholderia multivorans	Bacteria; Proteobacteria; Betaproteobacteria; Burkholderiales; Burkholderiaceae; Burkholderia; Burkholderia cepacia complex
NZ_PVFO01000017.1	747	1478	WP_105789850.1	C6P82_RS07415	GCF_002981075.1	VRR-NUC domain-containing protein	VRR_NUC	Burkholderia multivorans	Bacteria; Proteobacteria; Betaproteobacteria; Burkholderiales; Burkholderiaceae; Burkholderia; Burkholderia cepacia complex
NZ_PVGB01000133.1	44268	45050	WP_105797440.1	C6Q07_RS30050	GCF_002980995.1	nuclease	VRR_NUC	Burkholderia multivorans	Bacteria; Proteobacteria; Betaproteobacteria; Burkholderiales; Burkholderiaceae; Burkholderia; Burkholderia cepacia complex
NZ_PVGO01000053.1	145981	146730	WP_105812444.1	C6Q23_RS24945	GCF_002981295.1	VRR-NUC domain-containing protein	VRR_NUC	Burkholderia multivorans	Bacteria; Proteobacteria; Betaproteobacteria; Burkholderiales; Burkholderiaceae; Burkholderia; Burkholderia cepacia complex
NZ_PVHA01000080.1	4745	5485	WP_105810533.1	C6T69_RS15105	GCF_002981395.1	VRR-NUC domain-containing protein	VRR_NUC	Burkholderia multivorans	Bacteria; Proteobacteria; Betaproteobacteria; Burkholderiales; Burkholderiaceae; Burkholderia; Burkholderia cepacia complex
NZ_PVHH01000020.1	17593	18852	WP_105810943.1	C6T53_RS03685	GCF_002981535.1	VRR-NUC domain-containing protein	VRR_NUC+TM+TM	Burkholderia multivorans	Bacteria; Proteobacteria; Betaproteobacteria; Burkholderiales; Burkholderiaceae; Burkholderia; Burkholderia cepacia complex
NZ_PVGP01000060.1	36801	37583	WP_105810629.1	C6Q22_RS12730	GCF_002981715.1	nuclease	VRR_NUC	Burkholderia multivorans	Bacteria; Proteobacteria; Betaproteobacteria; Burkholderiales; Burkholderiaceae; Burkholderia; Burkholderia cepacia complex
NZ_PVFX01000007.1	69599	70861	WP_105819217.1	C6Q13_RS01935	GCF_002980955.1	VRR-NUC domain-containing protein	VRR_NUC+TM+TM	Burkholderia gladioli	Bacteria; Proteobacteria; Betaproteobacteria; Burkholderiales; Burkholderiaceae; Burkholderia
NZ_PVFX01000050.1	30576	31313	WP_105819784.1	C6Q13_RS11105	GCF_002980955.1	VRR-NUC domain-containing protein	VRR_NUC	Burkholderia gladioli	Bacteria; Proteobacteria; Betaproteobacteria; Burkholderiales; Burkholderiaceae; Burkholderia
NZ_PVGK01000076.1	329852	330592	WP_105817142.1	C6Q17_RS21775	GCF_002981225.1	VRR-NUC domain-containing protein	VRR_NUC	Burkholderia contaminans	Bacteria; Proteobacteria; Betaproteobacteria; Burkholderiales; Burkholderiaceae; Burkholderia; Burkholderia cepacia complex
NZ_PVHE01000061.1	46389	47132	WP_105827475.1	C6V08_RS10050	GCF_002981475.1	VRR-NUC domain-containing protein	DUF4776+VRR_NUC	Burkholderia gladioli	Bacteria; Proteobacteria; Betaproteobacteria; Burkholderiales; Burkholderiaceae; Burkholderia
NZ_PVHE01000179.1	126230	126934	WP_105829600.1	C6V08_RS33415	GCF_002981475.1	VRR-NUC domain-containing protein	VRR_NUC	Burkholderia gladioli	Bacteria; Proteobacteria; Betaproteobacteria; Burkholderiales; Burkholderiaceae; Burkholderia
NZ_PVHJ01000100.1	7757	8485	WP_105825654.1	C6T71_RS22020	GCF_002981555.1	VRR-NUC domain-containing protein	VRR_NUC	Burkholderia multivorans	Bacteria; Proteobacteria; Betaproteobacteria; Burkholderiales; Burkholderiaceae; Burkholderia; Burkholderia cepacia complex
NZ_PVFC01000048.1	73900	74643	WP_105851546.1	C6P72_RS09940	GCF_002980975.1	VRR-NUC domain-containing protein	DUF4776+VRR_NUC	Burkholderia gladioli	Bacteria; Proteobacteria; Betaproteobacteria; Burkholderiales; Burkholderiaceae; Burkholderia
NZ_PVGZ01000042.1	80668	81930	WP_105849215.1	C6V06_RS07120	GCF_002981405.1	VRR-NUC domain-containing protein	VRR_NUC+TM+TM	Burkholderia gladioli	Bacteria; Proteobacteria; Betaproteobacteria; Burkholderiales; Burkholderiaceae; Burkholderia
NZ_PVFC01000080.1	6061	6765	WP_105852052.1	C6P72_RS16625	GCF_002980975.1	VRR-NUC domain-containing protein	VRR_NUC	Burkholderia gladioli	Bacteria; Proteobacteria; Betaproteobacteria; Burkholderiales; Burkholderiaceae; Burkholderia
NZ_PVGZ01000054.1	46241	46984	WP_105858392.1	C6V06_RS10430	GCF_002981405.1	VRR-NUC domain-containing protein	DUF4776+VRR_NUC	Burkholderia gladioli	Bacteria; Proteobacteria; Betaproteobacteria; Burkholderiales; Burkholderiaceae; Burkholderia
NZ_PVGZ01000084.1	127310	128014	WP_105858948.1	C6V06_RS19460	GCF_002981405.1	VRR-NUC domain-containing protein	VRR_NUC	Burkholderia gladioli	Bacteria; Proteobacteria; Betaproteobacteria; Burkholderiales; Burkholderiaceae; Burkholderia
NZ_NRMZ01000002.1	240506	241768	WP_105884356.1	CI884_RS12335	GCF_002983565.1	VRR-NUC domain-containing protein	VRR_NUC	Cronobacter malonaticus	Bacteria; Proteobacteria; Gammaproteobacteria; Enterobacterales; Enterobacteriaceae; Cronobacter
NZ_CP049154.1	3657553	3658815	WP_105944710.1	G4U59_RS17180	GCF_018884125.1	VRR-NUC domain-containing protein	VRR_NUC	Cronobacter sakazakii	Bacteria; Proteobacteria; Gammaproteobacteria; Enterobacterales; Enterobacteriaceae; Cronobacter
NZ_CP027657.1	5683979	5684686	WP_106742428.1	C7A17_RS26215	GCF_003008615.1	VRR-NUC domain-containing protein	VRR_NUC	Pseudomonas mendocina	Bacteria; Proteobacteria; Gammaproteobacteria; Pseudomonadales; Pseudomonadaceae; Pseudomonas
NZ_PXWF02000119.1	1389	2114	WP_106757023.1	C7C56_RS08585	GCF_003011895.2	VRR-NUC domain-containing protein	VRR_NUC	Massilia glaciei	Bacteria; Proteobacteria; Betaproteobacteria; Burkholderiales; Oxalobacteraceae; Massilia group; Massilia
NZ_PXWF02000229.1	1840	2568	WP_106757971.1	C7C56_RS13870	GCF_003011895.2	VRR-NUC domain-containing protein	VRR_NUC+TM	Massilia glaciei	Bacteria; Proteobacteria; Betaproteobacteria; Burkholderiales; Oxalobacteraceae; Massilia group; Massilia
NZ_LSIR01000163.1	579	2063	WP_107145245.1	AX665_RS12700	GCF_001556335.1	VRR-NUC domain-containing protein	VRR_NUC+TM+TM	Neisseria mucosa	Bacteria; Proteobacteria; Betaproteobacteria; Neisseriales; Neisseriaceae; Neisseria
NZ_PYUC01000005.1	101540	102796	WP_107151047.1	C9I57_RS11310	GCF_003028655.1	VRR-NUC domain-containing protein	VRR_NUC+TM+TM	Trinickia symbiotica	Bacteria; Proteobacteria; Betaproteobacteria; Burkholderiales; Burkholderiaceae; Trinickia
NZ_PXJI01000091.1	1167	2399	WP_107330472.1	C6584_RS17295	GCF_003034155.1	VRR-NUC domain-containing protein	VRR_NUC+TM+TM	Pseudomonas otitidis	Bacteria; Proteobacteria; Gammaproteobacteria; Pseudomonadales; Pseudomonadaceae; Pseudomonas
NZ_PHGS01000011.1	2684	3820	WP_107676027.1	DA915_RS12970	GCF_003031125.1	DUF4150 domain-containing protein	Tox-PAAR-like	Agrobacterium sp. LAD9	Bacteria; Proteobacteria; Alphaproteobacteria; Hyphomicrobiales; Rhizobiaceae; Rhizobium/Agrobacterium group; Agrobacterium; unclassified Agrobacterium
NZ_QARX01000001.1	4285801	4286979	WP_107800902.1	DB032_RS19345	GCF_003052555.1	VRR-NUC domain-containing protein	VRR_NUC+TM+TM	Chromobacterium sp. Panama	Bacteria; Proteobacteria; Betaproteobacteria; Neisseriales; Chromobacteriaceae; Chromobacterium; unclassified Chromobacterium
NZ_QARX01000001.1	4563236	4564468	WP_107801086.1	DB032_RS20505	GCF_003052555.1	VRR-NUC domain-containing protein	VRR_NUC+TM+TM	Chromobacterium sp. Panama	Bacteria; Proteobacteria; Betaproteobacteria; Neisseriales; Chromobacteriaceae; Chromobacterium; unclassified Chromobacterium
NZ_POXL01000006.1	176720	177691	WP_107858041.1	DBY97_RS08275	GCF_003044645.1	VRR-NUC domain-containing protein	VRR_NUC+TM+TM	Neisseria subflava	Bacteria; Proteobacteria; Betaproteobacteria; Neisseriales; Neisseriaceae; Neisseria
NZ_QAYM01000002.1	82475	83473	WP_108008175.1	DBL01_RS00385	GCF_003053325.1	hypothetical protein	RE_Bpu10I	Acinetobacter pittii	Bacteria; Proteobacteria; Gammaproteobacteria; Moraxellales; Moraxellaceae; Acinetobacter; Acinetobacter calcoaceticus/baumannii complex
NZ_QBEL01000008.1	159242	159943	WP_108241140.1	DB386_RS17225	GCF_003055235.1	VRR-NUC domain-containing protein	VRR_NUC	Pseudomonas aeruginosa	Bacteria; Proteobacteria; Gammaproteobacteria; Pseudomonadales; Pseudomonadaceae; Pseudomonas
NZ_PTOX01000001.1	240344	241606	WP_108463230.1	C3D71_RS01170	GCF_003062265.1	VRR-NUC domain-containing protein	VRR_NUC	Cronobacter sakazakii	Bacteria; Proteobacteria; Gammaproteobacteria; Enterobacterales; Enterobacteriaceae; Cronobacter
NZ_QAIG01000005.1	103321	104619	WP_108487141.1	DBR00_RS03345	GCF_003060885.1	VRR-NUC domain-containing protein	VRR_NUC+TM+TM	Pseudomonas sp. HMWF032	Bacteria; Proteobacteria; Gammaproteobacteria; Pseudomonadales; Pseudomonadaceae; Pseudomonas
NZ_QAYS01000067.1	21543	22877	WP_108696210.1	DBL07_RS19300	GCF_003053425.1	VRR-NUC domain-containing protein	VRR_NUC+TM	Achromobacter mucicolens	Bacteria; Proteobacteria; Betaproteobacteria; Burkholderiales; Alcaligenaceae; Achromobacter
NZ_QAYS01000067.1	24061	25284	WP_146177863.1	DBL07_RS19310	GCF_003053425.1	hypothetical protein	VRR_NUC	Achromobacter mucicolens	Bacteria; Proteobacteria; Betaproteobacteria; Burkholderiales; Alcaligenaceae; Achromobacter
NZ_LXPW01000050.1	20836	22164	WP_108696212.1	A7J67_RS27860	GCF_001641525.1	hypothetical protein	VRR_NUC	Achromobacter xylosoxidans	Bacteria; Proteobacteria; Betaproteobacteria; Burkholderiales; Alcaligenaceae; Achromobacter
NZ_LXPW01000050.1	23447	24679	WP_167428001.1	A7J67_RS17380	GCF_001641525.1	VRR-NUC domain-containing protein	VRR_NUC	Achromobacter xylosoxidans	Bacteria; Proteobacteria; Betaproteobacteria; Burkholderiales; Alcaligenaceae; Achromobacter
NZ_OEOG01000001.1	49552	50328	WP_109341146.1	F01_RS00230	GCF_900240025.1	nuclease	VRR_NUC	Burkholderia cenocepacia	Bacteria; Proteobacteria; Betaproteobacteria; Burkholderiales; Burkholderiaceae; Burkholderia; Burkholderia cepacia complex
NZ_QBUY01000023.1	75125	75880	WP_109479059.1	DK391_RS16585	GCF_003121405.1	VRR-NUC domain-containing protein	VRR_NUC	Paraburkholderia sp. C35	Bacteria; Proteobacteria; Betaproteobacteria; Burkholderiales; Burkholderiaceae; Paraburkholderia
NZ_QFAW01000081.1	2739	4028	WP_109522540.1	C9I49_RS27850	GCF_003122305.1	VRR-NUC domain-containing protein	VRR_NUC+TM+TM	Pseudomonas prosekii	Bacteria; Proteobacteria; Gammaproteobacteria; Pseudomonadales; Pseudomonadaceae; Pseudomonas
NZ_CM009834.1	1	766	WP_109728028.1	DCF83_RS00005	GCF_003113475.1	VRR-NUC domain-containing protein	VRR_NUC+TM+TM	Edwardsiella tarda	Bacteria; Proteobacteria; Gammaproteobacteria; Enterobacterales; Hafniaceae; Edwardsiella
NZ_QDAB01000008.1	206489	207772	WP_109728765.1	DCF83_RS15185	GCF_003113475.1	VRR-NUC domain-containing protein	VRR_NUC+TM+TM	Edwardsiella tarda	Bacteria; Proteobacteria; Gammaproteobacteria; Enterobacterales; Hafniaceae; Edwardsiella
NZ_NBKX01000112.1	36	1325	WP_109862966.1	B6K63_RS15680	GCF_003146345.1	VRR-NUC domain-containing protein	VRR_NUC+TM+TM	Escherichia coli	Bacteria; Proteobacteria; Gammaproteobacteria; Enterobacterales; Enterobacteriaceae; Escherichia
NZ_QHGV01000008.1	347977	349278	WP_109995939.1	C5955_RS06875	GCF_003177135.1	VRR-NUC domain-containing protein	VRR_NUC+TM+TM	Cronobacter sakazakii	Bacteria; Proteobacteria; Gammaproteobacteria; Enterobacterales; Enterobacteriaceae; Cronobacter
NZ_PUWW01000008.1	644	2002	WP_110086074.1	C6H65_RS05300	GCF_002969055.1	VRR-NUC domain-containing protein	VRR_NUC+TM+TM	Photorhabdus luminescens	Bacteria; Proteobacteria; Gammaproteobacteria; Enterobacterales; Morganellaceae; Photorhabdus
NZ_PUWW01000033.1	2923	4284	WP_110086597.1	C6H65_RS11940	GCF_002969055.1	VRR-NUC domain-containing protein	VRR_NUC+TM+TM	Photorhabdus luminescens	Bacteria; Proteobacteria; Gammaproteobacteria; Enterobacterales; Morganellaceae; Photorhabdus
NZ_PUWW01000231.1	644	2008	WP_110087523.1	C6H65_RS23395	GCF_002969055.1	VRR-NUC domain-containing protein	VRR_NUC+TM+TM	Photorhabdus luminescens	Bacteria; Proteobacteria; Gammaproteobacteria; Enterobacterales; Morganellaceae; Photorhabdus
NZ_PUWU01000008.1	23886	25244	WP_110090695.1	C6H69_RS05325	GCF_002968975.1	VRR-NUC domain-containing protein	VRR_NUC+TM+TM	Photorhabdus luminescens	Bacteria; Proteobacteria; Gammaproteobacteria; Enterobacterales; Morganellaceae; Photorhabdus
NZ_PUWU01000101.1	1908	3266	WP_110092087.1	C6H69_RS23865	GCF_002968975.1	VRR-NUC domain-containing protein	VRR_NUC+TM+TM	Photorhabdus luminescens	Bacteria; Proteobacteria; Gammaproteobacteria; Enterobacterales; Morganellaceae; Photorhabdus
NZ_PUWU01000102.1	1893	3251	WP_110092090.1	C6H69_RS23890	GCF_002968975.1	VRR-NUC domain-containing protein	VRR_NUC+TM+TM	Photorhabdus luminescens	Bacteria; Proteobacteria; Gammaproteobacteria; Enterobacterales; Morganellaceae; Photorhabdus
NZ_PUWU01000108.1	1130	2491	WP_110092100.1	C6H69_RS24060	GCF_002968975.1	VRR-NUC domain-containing protein	VRR_NUC+TM+TM	Photorhabdus luminescens	Bacteria; Proteobacteria; Gammaproteobacteria; Enterobacterales; Morganellaceae; Photorhabdus
NZ_PUWW01000272.1	1	1222	WP_110087560.1	C6H65_RS23980	GCF_002969055.1	VRR-NUC domain-containing protein	VRR_NUC+TM+TM	Photorhabdus luminescens	Bacteria; Proteobacteria; Gammaproteobacteria; Enterobacterales; Morganellaceae; Photorhabdus
NZ_CP029660.1	263526	264200	WP_110193612.1	CSC33_RS01225	GCF_003193645.1	VRR-NUC domain-containing protein	VRR_NUC	Pseudomonas aeruginosa	Bacteria; Proteobacteria; Gammaproteobacteria; Pseudomonadales; Pseudomonadaceae; Pseudomonas
NZ_QJJV01000006.1	144272	145534	WP_110327230.1	C7400_RS11540	GCF_003201665.1	VRR-NUC domain-containing protein	VRR_NUC+TM+TM	Paraburkholderia tropica	Bacteria; Proteobacteria; Betaproteobacteria; Burkholderiales; Burkholderiaceae; Paraburkholderia
NZ_QKOE01000002.1	382983	384071	WP_110523285.1	DNK49_RS05355	GCF_003226565.1	DUF4150 domain-containing protein	Tox-PAAR-like	Azoarcus communis SWub3 = DSM 12120	Bacteria; Proteobacteria; Betaproteobacteria; Rhodocyclales; Zoogloeaceae; Azoarcus
NZ_QJRL01000009.1	87862	89115	WP_110744668.1	DMX11_RS11645	GCF_003205205.1	VRR-NUC domain-containing protein	VRR_NUC+TM+TM	Pseudomonas sp. LB-090624	Bacteria; Proteobacteria; Gammaproteobacteria; Pseudomonadales; Pseudomonadaceae; Pseudomonas
NZ_QITE01000001.1	522486	523787	WP_110868601.1	DOM38_RS02460	GCF_003206395.1	VRR-NUC domain-containing protein	VRR_NUC+TM+TM	Cronobacter sakazakii	Bacteria; Proteobacteria; Gammaproteobacteria; Enterobacterales; Enterobacteriaceae; Cronobacter
NZ_QITE01000005.1	238962	240224	WP_110869276.1	DOM38_RS15990	GCF_003206395.1	VRR-NUC domain-containing protein	VRR_NUC	Cronobacter sakazakii	Bacteria; Proteobacteria; Gammaproteobacteria; Enterobacterales; Enterobacteriaceae; Cronobacter
NZ_QIRJ01000005.1	259957	261219	WP_110798210.1	DOM49_RS14275	GCF_003206935.1	VRR-NUC domain-containing protein	VRR_NUC	Cronobacter sakazakii	Bacteria; Proteobacteria; Gammaproteobacteria; Enterobacterales; Enterobacteriaceae; Cronobacter
NZ_QIRT01000001.1	555183	556484	WP_110808906.1	DOM47_RS02675	GCF_003207025.1	VRR-NUC domain-containing protein	VRR_NUC+TM+TM	Cronobacter sakazakii	Bacteria; Proteobacteria; Gammaproteobacteria; Enterobacterales; Enterobacteriaceae; Cronobacter
NZ_QIRT01000007.1	47765	49027	WP_110809940.1	DOM47_RS16705	GCF_003207025.1	VRR-NUC domain-containing protein	VRR_NUC	Cronobacter sakazakii	Bacteria; Proteobacteria; Gammaproteobacteria; Enterobacterales; Enterobacteriaceae; Cronobacter
NZ_QLAB01000021.1	22461	23168	WP_111482014.1	DOT40_RS19220	GCF_003255915.1	VRR-NUC domain-containing protein	VRR_NUC	Pseudomonas stutzeri	Bacteria; Proteobacteria; Gammaproteobacteria; Pseudomonadales; Pseudomonadaceae; Pseudomonas
NZ_CP032922.1	2072000	2073136	WP_111803076.1	At1D1108_RS23280	GCF_003666425.1	DUF4150 domain-containing protein	Tox-PAAR-like	Agrobacterium tumefaciens	Bacteria; Proteobacteria; Alphaproteobacteria; Hyphomicrobiales; Rhizobiaceae; Rhizobium/Agrobacterium group; Agrobacterium; Agrobacterium tumefaciens complex
NZ_LS483470.1	577970	579403	WP_111739196.1	DQM29_RS02755	GCF_900478135.1	hypothetical protein	VRR_NUC	Leminorella richardii	Bacteria; Proteobacteria; Gammaproteobacteria; Enterobacterales; Budviciaceae; Leminorella
NZ_LQXQ01000137.1	668	1663	WP_111861410.1	AVJ19_RS20920	GCF_003268395.1	nuclease	TM+TM	Acinetobacter sp. CFCC 10889	Bacteria; Proteobacteria; Gammaproteobacteria; Moraxellales; Moraxellaceae; Acinetobacter
NZ_RHXC01000027.1	771	1769	WP_111812932.1	EGK59_RS13895	GCF_003938595.1	hypothetical protein	RE_Bpu10I+VRR_NUC	Acinetobacter soli	Bacteria; Proteobacteria; Gammaproteobacteria; Moraxellales; Moraxellaceae; Acinetobacter
NZ_BKRL01000039.1	17207	18223	WP_111828111.1	GBR51_RS11325	GCF_009001395.1	nuclease	TM+TM	Acinetobacter junii	Bacteria; Proteobacteria; Gammaproteobacteria; Pseudomonadales; Moraxellaceae; Acinetobacter
NZ_QLUZ01000038.1	3356	4621	WP_111943410.1	DPR02_RS36575	GCF_003268125.1	VRR-NUC domain-containing protein	TM+TM+VRR_NUC+TM+TM	Burkholderia cepacia	Bacteria; Proteobacteria; Betaproteobacteria; Burkholderiales; Burkholderiaceae; Burkholderia; Burkholderia cepacia complex
NZ_QLTK01000001.1	270490	271749	WP_111928938.1	BX591_RS01240	GCF_003269035.1	VRR-NUC domain-containing protein	VRR_NUC+TM+TM	Paraburkholderia bryophila	Bacteria; Proteobacteria; Betaproteobacteria; Burkholderiales; Burkholderiaceae; Paraburkholderia
NZ_QLTK01000015.1	31844	33112	WP_111933240.1	BX591_RS21015	GCF_003269035.1	VRR-NUC domain-containing protein	VRR_NUC+TM+TM	Paraburkholderia bryophila	Bacteria; Proteobacteria; Betaproteobacteria; Burkholderiales; Burkholderiaceae; Paraburkholderia
NZ_QLTK01000046.1	31824	32570	WP_111935735.1	BX591_RS34265	GCF_003269035.1	VRR-NUC domain-containing protein	VRR_NUC	Paraburkholderia bryophila	Bacteria; Proteobacteria; Betaproteobacteria; Burkholderiales; Burkholderiaceae; Paraburkholderia
NZ_LWKL01000072.1	138679	139449	WP_111994442.1	A4G86_RS29050	GCF_003268455.1	nuclease	VRR_NUC	Burkholderia pseudomallei	Bacteria; Proteobacteria; Betaproteobacteria; Burkholderiales; Burkholderiaceae; Burkholderia; pseudomallei group
NZ_LWKL01000075.1	5253	6014	WP_111994466.1	A4G86_RS30135	GCF_003268455.1	nuclease	VRR_NUC	Burkholderia pseudomallei	Bacteria; Proteobacteria; Betaproteobacteria; Burkholderiales; Burkholderiaceae; Burkholderia; pseudomallei group
NZ_CP050198.1	5572375	5573664	WP_112022772.1	HBE71_RS22940	GCF_014216435.1	VRR-NUC domain-containing protein	VRR_NUC+TM+TM	Escherichia coli	Bacteria; Proteobacteria; Gammaproteobacteria; Enterobacterales; Enterobacteriaceae; Escherichia
NZ_JUGD01000036.1	58347	59426	WP_112070000.1	RB24_RS25100	GCF_003263475.1	DUF4150 domain-containing protein	Tox-PAAR-like	Herbaspirillum rubrisubalbicans	Bacteria; Proteobacteria; Betaproteobacteria; Burkholderiales; Oxalobacteraceae; Herbaspirillum
NZ_JWJC01000031.1	21920	22999	WP_112076994.1	RB25_RS24965	GCF_003263495.1	DUF4150 domain-containing protein	Tox-PAAR-like	Herbaspirillum rubrisubalbicans	Bacteria; Proteobacteria; Betaproteobacteria; Burkholderiales; Oxalobacteraceae; Herbaspirillum
NZ_UASZ01000012.1	31570	33087	WP_112549610.1	DS887_RS01840	GCF_900453145.1	VRR-NUC domain-containing protein	VRR_NUC+TM+TM	Morganella morganii	Bacteria; Proteobacteria; Gammaproteobacteria; Enterobacterales; Morganellaceae; Morganella
NZ_UASZ01000048.1	34040	35539	WP_112550289.1	DS887_RS11415	GCF_900453145.1	VRR-NUC domain-containing protein	VRR_NUC+TM+TM	Morganella morganii	Bacteria; Proteobacteria; Gammaproteobacteria; Enterobacterales; Morganellaceae; Morganella
NZ_MUXV01000088.1	1450	2370	WP_112742646.1	B0182_RS13420	GCF_002014975.1	VRR-NUC domain-containing protein	VRR_NUC+TM	Moraxella bovis	Bacteria; Proteobacteria; Gammaproteobacteria; Moraxellales; Moraxellaceae; Moraxella
NZ_CP030241.1	2452274	2453587	WP_158079724.1	DQF64_RS12420	GCF_003287015.1	VRR-NUC domain-containing protein	VRR_NUC+TM	Moraxella bovis	Bacteria; Proteobacteria; Gammaproteobacteria; Moraxellales; Moraxellaceae; Moraxella
NZ_WTSG01000032.1	21828	23117	WP_112793973.1	GP935_RS24045	GCF_009799085.1	VRR-NUC domain-containing protein	VRR_NUC+TM+TM	Escherichia coli	Bacteria; Proteobacteria; Gammaproteobacteria; Enterobacterales; Enterobacteriaceae; Escherichia
NZ_NSCJ01000046.1	34253	35608	WP_112879227.1	CKY05_RS19780	GCF_003287585.1	VRR-NUC domain-containing protein	VRR_NUC+TM+TM	Photorhabdus sp. S10-54	Bacteria; Proteobacteria; Gammaproteobacteria; Enterobacterales; Morganellaceae; Photorhabdus; unclassified Photorhabdus
NZ_NSCJ01000059.1	625	1983	WP_112879506.1	CKY05_RS21680	GCF_003287585.1	VRR-NUC domain-containing protein	VRR_NUC+TM+TM	Photorhabdus sp. S10-54	Bacteria; Proteobacteria; Gammaproteobacteria; Enterobacterales; Morganellaceae; Photorhabdus; unclassified Photorhabdus
NZ_CP025775.1	142416	143120	WP_112958236.1	CE206_RS29330	GCF_003293615.1	VRR-NUC domain-containing protein	VRR_NUC	Achromobacter xylosoxidans	Bacteria; Proteobacteria; Betaproteobacteria; Burkholderiales; Alcaligenaceae; Achromobacter
NZ_NSCI01000017.1	503	1861	WP_113026013.1	CKY01_RS13260	GCF_003287575.1	VRR-NUC domain-containing protein	VRR_NUC+TM+TM	Photorhabdus laumondii subsp. clarkei	Bacteria; Proteobacteria; Gammaproteobacteria; Enterobacterales; Morganellaceae; Photorhabdus
NZ_NSCI01000037.1	38027	39382	WP_113026887.1	CKY01_RS19905	GCF_003287575.1	VRR-NUC domain-containing protein	VRR_NUC+TM+TM	Photorhabdus laumondii subsp. clarkei	Bacteria; Proteobacteria; Gammaproteobacteria; Enterobacterales; Morganellaceae; Photorhabdus
NZ_QMFZ01000031.1	74582	75847	WP_113047155.1	DPV79_RS29725	GCF_003294055.1	VRR-NUC domain-containing protein	TM+TM+VRR_NUC+TM+TM	Burkholderia reimsis	Bacteria; Proteobacteria; Betaproteobacteria; Burkholderiales; Burkholderiaceae; Burkholderia
NZ_QNMU01000425.1	43487	44182	WP_113079227.1	BRN09_RS24635	GCF_003294835.1	VRR-NUC domain-containing protein	VRR_NUC	Xanthomonas oryzae pv. oryzae	Bacteria; Proteobacteria; Gammaproteobacteria; Xanthomonadales; Xanthomonadaceae; Xanthomonas
NZ_QNLW01000296.1	43684	44379	WP_113186839.1	BRM80_RS16120	GCF_003296305.1	VRR-NUC domain-containing protein	VRR_NUC	Xanthomonas oryzae pv. oryzae	Bacteria; Proteobacteria; Gammaproteobacteria; Xanthomonadales; Xanthomonadaceae; Xanthomonas
NZ_QNIO01000511.1	23151	23846	WP_113255848.1	BRL93_RS23545	GCF_003297765.1	VRR-NUC domain-containing protein	VRR_NUC	Xanthomonas oryzae pv. oryzae	Bacteria; Proteobacteria; Gammaproteobacteria; Xanthomonadales; Xanthomonadaceae; Xanthomonas
NZ_QNNO01000861.1	7	702	WP_113343307.1	BRN31_RS21555	GCF_003300685.1	VRR-NUC domain-containing protein	VRR_NUC	Xanthomonas oryzae pv. oryzae	Bacteria; Proteobacteria; Gammaproteobacteria; Xanthomonadales; Xanthomonadaceae; Xanthomonas
NZ_CP024902.1	1810716	1811480	WP_114176983.1	CUJ89_RS08775	GCF_003330765.1	VRR-NUC domain-containing protein	VRR_NUC	Burkholderia pyrrocinia	Bacteria; Proteobacteria; Betaproteobacteria; Burkholderiales; Burkholderiaceae; Burkholderia; Burkholderia cepacia complex
NZ_CP024942.1	1392829	1394073	WP_114164128.1	CUJ90_RS24805	GCF_003330825.1	VRR-NUC domain-containing protein	VRR_NUC+TM+TM	Paraburkholderia terricola	Bacteria; Proteobacteria; Betaproteobacteria; Burkholderiales; Burkholderiaceae; Paraburkholderia
NZ_QOVA01000024.1	22080	23336	WP_114195738.1	DRI82_RS20350	GCF_003332275.1	VRR-NUC domain-containing protein	VRR_NUC	Edaphovirga cremea	Bacteria; Proteobacteria; Gammaproteobacteria; Enterobacterales; Enterobacteriaceae; Edaphovirga
NZ_QDGS01000006.1	8110	8817	WP_114232252.1	PA57_RS10350	GCF_003332525.1	VRR-NUC domain-containing protein	VRR_NUC	Pseudomonas aeruginosa	Bacteria; Proteobacteria; Gammaproteobacteria; Pseudomonadales; Pseudomonadaceae; Pseudomonas
NZ_UGQU01000002.1	14557	15870	WP_115006481.1	DX073_RS05560	GCF_900453205.1	VRR-NUC domain-containing protein	VRR_NUC+TM	Moraxella lacunata	Bacteria; Proteobacteria; Gammaproteobacteria; Pseudomonadales; Moraxellaceae; Moraxella
NZ_QRGA01000008.1	24490	25254	WP_115534359.1	DWV00_RS14810	GCF_003367175.1	VRR-NUC domain-containing protein	VRR_NUC	Trinickia dinghuensis	Bacteria; Proteobacteria; Betaproteobacteria; Burkholderiales; Burkholderiaceae; Trinickia
NZ_QRGA01000024.1	4359	5108	WP_115537467.1	DWV00_RS31110	GCF_003367175.1	VRR-NUC domain-containing protein	VRR_NUC	Trinickia dinghuensis	Bacteria; Proteobacteria; Betaproteobacteria; Burkholderiales; Burkholderiaceae; Trinickia
NZ_UFUH01000001.1	2625750	2626478	WP_115633511.1	DY265_RS12690	GCF_900446275.1	VRR-NUC domain-containing protein	VRR_NUC	Burkholderia oklahomensis	Bacteria; Proteobacteria; Betaproteobacteria; Burkholderiales; Burkholderiaceae; Burkholderia; pseudomallei group
NZ_BGPP01000003.1	541562	542263	WP_116423475.1	PCLA_RS09225	GCF_003402515.1	VRR-NUC domain-containing protein	VRR_NUC+TM	Pseudomonas citronellolis	Bacteria; Proteobacteria; Gammaproteobacteria; Pseudomonadales; Pseudomonadaceae; Pseudomonas
NZ_QPDS01000015.1	538002	538703	WP_117166142.1	D2G36_RS16215	GCF_003415775.1	VRR-NUC domain-containing protein	VRR_NUC	Pseudomonas cichorii	Bacteria; Proteobacteria; Gammaproteobacteria; Pseudomonadales; Pseudomonadaceae; Pseudomonas
NZ_QPDT01000010.1	70065	71363	WP_117182655.1	D2G37_RS14825	GCF_003416215.1	VRR-NUC domain-containing protein	VRR_NUC+TM+TM	Pseudomonas cichorii	Bacteria; Proteobacteria; Gammaproteobacteria; Pseudomonadales; Pseudomonadaceae; Pseudomonas
NZ_QPEB01000001.1	588949	589650	WP_117185119.1	D2G44_RS02695	GCF_003415695.1	VRR-NUC domain-containing protein	VRR_NUC	Pseudomonas cichorii	Bacteria; Proteobacteria; Gammaproteobacteria; Pseudomonadales; Pseudomonadaceae; Pseudomonas
NZ_QJKM01000001.1	383632	384396	WP_117190271.1	DMO26_RS01675	GCF_003425685.1	hypothetical protein		Rhizobium terrae	Bacteria; Proteobacteria; Alphaproteobacteria; Hyphomicrobiales; Rhizobiaceae; Rhizobium/Agrobacterium group; Rhizobium
NZ_BHGD02000074.1	10231	11247	WP_119055248.1	D5I77_RS12775	GCF_003569565.2	nuclease	TM+TM	Acinetobacter colistiniresistens	Bacteria; Proteobacteria; Gammaproteobacteria; Pseudomonadales; Moraxellaceae; Acinetobacter
NZ_BHGE01000038.1	17845	18843	WP_119026287.1	D5I70_RS13470	GCF_003569585.1	hypothetical protein	RE_Bpu10I	Acinetobacter soli	Bacteria; Proteobacteria; Gammaproteobacteria; Moraxellales; Moraxellaceae; Acinetobacter
NZ_QXFB01000001.1	44002	44772	WP_119565483.1	D2W70_RS00290	GCF_003583425.1	VRR-NUC domain-containing protein	VRR_NUC	Burkholderia pseudomallei	Bacteria; Proteobacteria; Betaproteobacteria; Burkholderiales; Burkholderiaceae; Burkholderia; pseudomallei group
NZ_QXFC01000001.1	85491	86249	WP_119637172.1	D2V84_RS00430	GCF_003583435.1	VRR-NUC domain-containing protein	VRR_NUC	Burkholderia pseudomallei	Bacteria; Proteobacteria; Betaproteobacteria; Burkholderiales; Burkholderiaceae; Burkholderia; pseudomallei group
NZ_RAHH01000013.1	52665	53948	WP_120133089.1	D6C13_RS12600	GCF_003602095.1	VRR-NUC domain-containing protein	VRR_NUC+TM+TM	Rahnella woolbedingensis	Bacteria; Proteobacteria; Gammaproteobacteria; Enterobacterales; Yersiniaceae; Rahnella
NZ_CP032084.1	50071	50898	WP_120153315.1	DVB37_RS00225	GCF_003600685.1	VRR-NUC domain-containing protein	VRR_NUC	Achromobacter sp. B7	Bacteria; Proteobacteria; Betaproteobacteria; Burkholderiales; Alcaligenaceae; Achromobacter; unclassified Achromobacter
NZ_CP032084.1	3184860	3185699	WP_120155825.1	DVB37_RS14305	GCF_003600685.1	VRR-NUC domain-containing protein	SP+VRR_NUC	Achromobacter sp. B7	Bacteria; Proteobacteria; Betaproteobacteria; Burkholderiales; Alcaligenaceae; Achromobacter; unclassified Achromobacter
NZ_CP032084.1	3187278	3188117	WP_120155830.1	DVB37_RS14315	GCF_003600685.1	VRR-NUC domain-containing protein	SP+VRR_NUC	Achromobacter sp. B7	Bacteria; Proteobacteria; Betaproteobacteria; Burkholderiales; Alcaligenaceae; Achromobacter; unclassified Achromobacter
NZ_RAHH01000021.1	80003	80329	WP_120133964.1	D6C13_RS17400	GCF_003602095.1	hypothetical protein		Rahnella woolbedingensis	Bacteria; Proteobacteria; Gammaproteobacteria; Enterobacterales; Yersiniaceae; Rahnella
NZ_RAHH01000035.1	4857	6137	WP_120134838.1	D6C13_RS22120	GCF_003602095.1	VRR-NUC domain-containing protein	VRR_NUC+TM+TM	Rahnella woolbedingensis	Bacteria; Proteobacteria; Gammaproteobacteria; Enterobacterales; Yersiniaceae; Rahnella
NZ_RAXT01000001.1	162176	162910	WP_120382460.1	D7V20_RS00825	GCF_003611475.1	VRR-NUC domain-containing protein	VRR_NUC+TM	Acinetobacter rongchengensis	Bacteria; Proteobacteria; Gammaproteobacteria; Moraxellales; Moraxellaceae; Acinetobacter
NZ_RAXT01000017.1	43352	44365	WP_120384143.1	D7V20_RS09975	GCF_003611475.1	nuclease	TM+TM	Acinetobacter rongchengensis	Bacteria; Proteobacteria; Gammaproteobacteria; Moraxellales; Moraxellaceae; Acinetobacter
NZ_RAWD01000028.1	21636	22721	WP_120532220.1	D7X74_RS07400	GCF_003612065.1	DUF4150 domain-containing protein	Tox-PAAR-like+VRR_NUC	Corallococcus sp. CA047B	Bacteria; Proteobacteria; Deltaproteobacteria; Myxococcales; Cystobacterineae; Myxococcaceae; Corallococcus; unclassified Corallococcus
NZ_RADF01000179.1	14157	14864	WP_121142427.1	DQI09_RS13170	GCF_003630295.1	VRR-NUC domain-containing protein	VRR_NUC	Pseudomonas aeruginosa	Bacteria; Proteobacteria; Gammaproteobacteria; Pseudomonadales; Pseudomonadaceae; Pseudomonas
NZ_QZXL01000011.1	7312	8013	WP_121199624.1	DQG58_RS00430	GCF_003632615.1	VRR-NUC domain-containing protein	VRR_NUC+TM	Pseudomonas aeruginosa	Bacteria; Proteobacteria; Gammaproteobacteria; Pseudomonadales; Pseudomonadaceae; Pseudomonas
NZ_QZXI01000003.1	424936	425637	WP_121129585.1	DQG55_RS02720	GCF_003632675.2	VRR-NUC domain-containing protein	VRR_NUC+TM	Pseudomonas aeruginosa	Bacteria; Proteobacteria; Gammaproteobacteria; Pseudomonadales; Pseudomonadaceae; Pseudomonas
NZ_CP026986.1	3815644	3816993	WP_121266132.1	C5E26_RS18070	GCF_003628615.1	VRR-NUC domain-containing protein	VRR_NUC+TM+TM	Pectobacterium parmentieri	Bacteria; Proteobacteria; Gammaproteobacteria; Enterobacterales; Pectobacteriaceae; Pectobacterium
NZ_QZXQ01000229.1	683	1390	WP_121291139.1	DQG63_RS27220	GCF_003632585.1	VRR-NUC domain-containing protein	VRR_NUC	Pseudomonas aeruginosa	Bacteria; Proteobacteria; Gammaproteobacteria; Pseudomonadales; Pseudomonadaceae; Pseudomonas
NZ_PSZH01000004.1	208648	209997	WP_121296287.1	C5E04_RS19530	GCF_003628025.1	VRR-NUC domain-containing protein	VRR_NUC+TM+TM	Pectobacterium parmentieri	Bacteria; Proteobacteria; Gammaproteobacteria; Enterobacterales; Pectobacteriaceae; Pectobacterium
NZ_RABK01000048.1	114047	114748	WP_121295100.1	DQH61_RS13100	GCF_003631245.1	VRR-NUC domain-containing protein	VRR_NUC+TM	Pseudomonas aeruginosa	Bacteria; Proteobacteria; Gammaproteobacteria; Pseudomonadales; Pseudomonadaceae; Pseudomonas
NZ_QZZJ01000051.1	106380	107081	WP_121327192.1	DQH08_RS08950	GCF_003632045.1	VRR-NUC domain-containing protein	VRR_NUC+TM	Pseudomonas aeruginosa	Bacteria; Proteobacteria; Gammaproteobacteria; Pseudomonadales; Pseudomonadaceae; Pseudomonas
NZ_QZXC01000209.1	24912	25613	WP_121305123.1	DQG49_RS08835	GCF_003632765.1	VRR-NUC domain-containing protein	VRR_NUC+TM	Pseudomonas aeruginosa	Bacteria; Proteobacteria; Gammaproteobacteria; Pseudomonadales; Pseudomonadaceae; Pseudomonas
NZ_QZZM01000100.1	47692	48393	WP_121334330.1	DQH11_RS06255	GCF_003633015.1	VRR-NUC domain-containing protein	VRR_NUC+TM	Pseudomonas aeruginosa	Bacteria; Proteobacteria; Gammaproteobacteria; Pseudomonadales; Pseudomonadaceae; Pseudomonas
NZ_QZXN01000001.1	2131	2832	WP_121357821.1	DQG60_RS00020	GCF_003633465.1	VRR-NUC domain-containing protein	VRR_NUC+TM	Pseudomonas aeruginosa	Bacteria; Proteobacteria; Gammaproteobacteria; Pseudomonadales; Pseudomonadaceae; Pseudomonas
NZ_RADD01000070.1	170350	171051	WP_121410759.1	DQI07_RS04155	GCF_003630355.2	VRR-NUC domain-containing protein	VRR_NUC+TM	Pseudomonas aeruginosa	Bacteria; Proteobacteria; Gammaproteobacteria; Pseudomonadales; Pseudomonadaceae; Pseudomonas
NZ_CP032927.1	10262	11383	WP_121592444.1	At1D1460_RS14675	GCF_003666445.1	DUF4150 domain-containing protein	Tox-PAAR-like	Agrobacterium tumefaciens	Bacteria; Proteobacteria; Alphaproteobacteria; Hyphomicrobiales; Rhizobiaceae; Rhizobium/Agrobacterium group; Agrobacterium; Agrobacterium tumefaciens complex
NZ_QWFV01000034.1	56490	57464	WP_121774338.1	D1G79_RS06450	GCF_003670255.1	hypothetical protein	TM	Acinetobacter bereziniae	Bacteria; Proteobacteria; Gammaproteobacteria; Moraxellales; Moraxellaceae; Acinetobacter
NZ_QWFV01000052.1	608	1342	WP_121774602.1	D1G79_RS09495	GCF_003670255.1	VRR-NUC domain-containing protein	VRR_NUC	Acinetobacter bereziniae	Bacteria; Proteobacteria; Gammaproteobacteria; Moraxellales; Moraxellaceae; Acinetobacter
NZ_QWFV01000084.1	19096	20109	WP_121775145.1	D1G79_RS15300	GCF_003670255.1	nuclease	TM+TM	Acinetobacter bereziniae	Bacteria; Proteobacteria; Gammaproteobacteria; Moraxellales; Moraxellaceae; Acinetobacter
NZ_RFFK01000031.1	2161	2868	WP_122110269.1	EA796_RS22760	GCF_003696305.1	VRR-NUC domain-containing protein	VRR_NUC	Pseudomonas sp. AOB-7	Bacteria; Proteobacteria; Gammaproteobacteria; Pseudomonadales; Pseudomonadaceae; Pseudomonas
NZ_RBPY01000005.1	24987	25712	WP_122277561.1	ALQ36_RS00745	GCF_003700055.1	VRR-NUC domain-containing protein	VRR_NUC	Pseudomonas syringae pv. primulae	Bacteria; Proteobacteria; Gammaproteobacteria; Pseudomonadales; Pseudomonadaceae; Pseudomonas
NZ_RBNR01000276.1	1558	2283	WP_122294079.1	ALQ95_RS23040	GCF_003698905.1	VRR-NUC domain-containing protein	VRR_NUC	Pseudomonas syringae pv. ribicola	Bacteria; Proteobacteria; Gammaproteobacteria; Pseudomonadales; Pseudomonadaceae; Pseudomonas
NZ_RBOY01000025.1	25931	26224	WP_122311845.1	ALQ62_RS07275	GCF_003699785.1	VRR-NUC domain-containing protein	VRR_NUC	Pseudomonas coronafaciens pv. zizaniae	Bacteria; Proteobacteria; Gammaproteobacteria; Pseudomonadales; Pseudomonadaceae; Pseudomonas; Pseudomonas coronafaciens
NZ_RBRE01000039.1	111390	112091	WP_122315642.1	ALQ04_RS10240	GCF_003700275.1	VRR-NUC domain-containing protein	VRR_NUC	Pseudomonas cichorii	Bacteria; Proteobacteria; Gammaproteobacteria; Pseudomonadales; Pseudomonadaceae; Pseudomonas
NZ_RBPN01000314.1	84728	86026	WP_122372929.1	ALQ47_RS27125	GCF_003699995.1	VRR-NUC domain-containing protein	VRR_NUC+TM+TM	Pseudomonas cichorii	Bacteria; Proteobacteria; Gammaproteobacteria; Pseudomonadales; Pseudomonadaceae; Pseudomonas
NZ_UTCC01000286.1	345899	347185	WP_122447783.1	EES97_RS07765	GCF_900580895.1	VRR-NUC domain-containing protein	VRR_NUC+TM+TM+TM	Pseudomonas viridiflava	Bacteria; Proteobacteria; Gammaproteobacteria; Pseudomonadales; Pseudomonadaceae; Pseudomonas
NZ_UTBH01000200.1	284	1165	WP_122528336.1	EET20_RS26855	GCF_900580695.1	VRR-NUC domain-containing protein	VRR_NUC	Pseudomonas viridiflava	Bacteria; Proteobacteria; Gammaproteobacteria; Pseudomonadales; Pseudomonadaceae; Pseudomonas
NZ_UTBH01000244.1	53360	54238	WP_122528431.1	EET20_RS28380	GCF_900580695.1	VRR-NUC domain-containing protein	VRR_NUC	Pseudomonas viridiflava	Bacteria; Proteobacteria; Gammaproteobacteria; Pseudomonadales; Pseudomonadaceae; Pseudomonas
NZ_RCOD01000076.1	1177	2325	WP_122611208.1	D8U60_RS20785	GCF_004307505.1	VRR-NUC domain-containing protein	VRR_NUC	Pseudomonas sp. Sample_11	Bacteria; Proteobacteria; Gammaproteobacteria; Pseudomonadales; Pseudomonadaceae; Pseudomonas
NZ_UTBZ01000136.1	61613	62311	WP_122599217.1	EET18_RS19285	GCF_900580865.1	VRR-NUC domain-containing protein	VRR_NUC	Pseudomonas viridiflava	Bacteria; Proteobacteria; Gammaproteobacteria; Pseudomonadales; Pseudomonadaceae; Pseudomonas
NZ_UUSH01000026.1	85824	86585	WP_122652543.1	EFD39_RS31610	GCF_900591885.1	VRR-NUC domain-containing protein	VRR_NUC	Burkholderia pseudomallei	Bacteria; Proteobacteria; Betaproteobacteria; Burkholderiales; Burkholderiaceae; Burkholderia; pseudomallei group
NZ_UUTF01000013.1	93468	94208	WP_122656674.1	EFB72_RS21250	GCF_900592105.1	VRR-NUC domain-containing protein	VRR_NUC	Burkholderia pseudomallei	Bacteria; Proteobacteria; Betaproteobacteria; Burkholderiales; Burkholderiaceae; Burkholderia; pseudomallei group
NZ_UUXE01000007.1	47185	47943	WP_122657902.1	EFD47_RS06035	GCF_900593115.1	VRR-NUC domain-containing protein	VRR_NUC	Burkholderia pseudomallei	Bacteria; Proteobacteria; Betaproteobacteria; Burkholderiales; Burkholderiaceae; Burkholderia; pseudomallei group
NZ_UTAI01000096.1	4992	5831	WP_122699447.1	E4620_RS18745	GCF_900580455.1	VRR-NUC domain-containing protein	VRR_NUC	Pseudomonas viridiflava	Bacteria; Proteobacteria; Gammaproteobacteria; Pseudomonadales; Pseudomonadaceae; Pseudomonas
NZ_RXYG01000022.1	26221	26922	WP_122726266.1	EJ576_RS27630	GCF_003970195.1	VRR-NUC domain-containing protein	VRR_NUC+TM	Pseudomonas sp. C 49-2	Bacteria; Proteobacteria; Gammaproteobacteria; Pseudomonadales; Pseudomonadaceae; Pseudomonas
NZ_UVAY01000010.1	130065	130838	WP_122769507.1	EFF79_RS15385	GCF_900594095.1	nuclease	VRR_NUC	Burkholderia pseudomallei	Bacteria; Proteobacteria; Betaproteobacteria; Burkholderiales; Burkholderiaceae; Burkholderia; pseudomallei group
NZ_UURM01000001.1	419998	420729	WP_122794600.1	EFY53_RS02325	GCF_900591665.1	VRR-NUC domain-containing protein	VRR_NUC	Burkholderia pseudomallei	Bacteria; Proteobacteria; Betaproteobacteria; Burkholderiales; Burkholderiaceae; Burkholderia; pseudomallei group
NZ_UUSZ01000010.1	184476	185228	WP_122791061.1	EFJ30_RS19050	GCF_900591965.1	VRR-NUC domain-containing protein	VRR_NUC	Burkholderia pseudomallei	Bacteria; Proteobacteria; Betaproteobacteria; Burkholderiales; Burkholderiaceae; Burkholderia; pseudomallei group
NZ_UVBH01000125.1	4070	5335	WP_122781811.1	EFI85_RS36665	GCF_900594195.1	VRR-NUC domain-containing protein	VRR_NUC+TM+TM	Burkholderia pseudomallei	Bacteria; Proteobacteria; Betaproteobacteria; Burkholderiales; Burkholderiaceae; Burkholderia; pseudomallei group
NZ_UUXS01000002.1	44033	44758	WP_122812317.1	EFK66_RS02065	GCF_900593275.1	VRR-NUC domain-containing protein	VRR_NUC	Burkholderia pseudomallei	Bacteria; Proteobacteria; Betaproteobacteria; Burkholderiales; Burkholderiaceae; Burkholderia; pseudomallei group
NZ_UVLT01000049.1	30005	30760	WP_122834121.1	EFV90_RS35505	GCF_900596925.1	VRR-NUC domain-containing protein	VRR_NUC	Burkholderia pseudomallei	Bacteria; Proteobacteria; Betaproteobacteria; Burkholderiales; Burkholderiaceae; Burkholderia; pseudomallei group
NZ_UVOO01000011.1	148533	149282	WP_122835421.1	EFS55_RS13030	GCF_900597665.1	VRR-NUC domain-containing protein	VRR_NUC	Burkholderia pseudomallei	Bacteria; Proteobacteria; Betaproteobacteria; Burkholderiales; Burkholderiaceae; Burkholderia; pseudomallei group
NZ_WOWZ01000002.1	8441	9175	WP_122883306.1	GNZ24_RS19235	GCF_009741325.1	VRR-NUC domain-containing protein	VRR_NUC	Burkholderia thailandensis	Bacteria; Proteobacteria; Betaproteobacteria; Burkholderiales; Burkholderiaceae; Burkholderia; pseudomallei group
NZ_UURO01000002.1	120203	120961	WP_122876427.1	EFU90_RS02585	GCF_900591695.1	VRR-NUC domain-containing protein	VRR_NUC	Burkholderia pseudomallei	Bacteria; Proteobacteria; Betaproteobacteria; Burkholderiales; Burkholderiaceae; Burkholderia; pseudomallei group
NZ_CP024943.1	429355	430086	WP_122944251.1	CVS37_RS02145	GCF_003711145.1	VRR-NUC domain-containing protein	VRR_NUC	Burkholderia lata	Bacteria; Proteobacteria; Betaproteobacteria; Burkholderiales; Burkholderiaceae; Burkholderia; Burkholderia cepacia complex
NZ_CP033430.1	789230	789982	WP_123036159.1	EDD84_RS04520	GCF_003713105.1	VRR-NUC domain-containing protein	VRR_NUC	Burkholderia gladioli	Bacteria; Proteobacteria; Betaproteobacteria; Burkholderiales; Burkholderiaceae; Burkholderia
NZ_CP033430.1	1027754	1028449	WP_123037117.1	EDD84_RS05605	GCF_003713105.1	VRR-NUC domain-containing protein	VRR_NUC	Burkholderia gladioli	Bacteria; Proteobacteria; Betaproteobacteria; Burkholderiales; Burkholderiaceae; Burkholderia
NZ_CP033430.1	3945234	3945968	WP_123036985.1	EDD84_RS18830	GCF_003713105.1	VRR-NUC domain-containing protein	VRR_NUC	Burkholderia gladioli	Bacteria; Proteobacteria; Betaproteobacteria; Burkholderiales; Burkholderiaceae; Burkholderia
NZ_MOBY01000002.1	676747	678033	WP_123374897.1	BK672_RS04270	GCF_003732755.1	VRR-NUC domain-containing protein	VRR_NUC+TM+TM	Pseudomonas fluorescens	Bacteria; Proteobacteria; Gammaproteobacteria; Pseudomonadales; Pseudomonadaceae; Pseudomonas
NZ_MOAN01000077.1	237485	237871	WP_123412014.1	BK636_RS16855	GCF_003731795.1	VRR-NUC domain-containing protein	VRR_NUC+TM	Pseudomonas chlororaphis	Bacteria; Proteobacteria; Gammaproteobacteria; Pseudomonadales; Pseudomonadaceae; Pseudomonas
NZ_MOBJ01000006.1	207585	208874	WP_123424511.1	BK659_RS07820	GCF_003732225.1	VRR-NUC domain-containing protein	VRR_NUC+DUF3168+TM+TM	Pseudomonas brassicacearum	Bacteria; Proteobacteria; Gammaproteobacteria; Pseudomonadales; Pseudomonadaceae; Pseudomonas
NZ_MOAZ01000013.1	42477	43178	WP_123476633.1	BK649_RS17980	GCF_003732005.1	VRR-NUC domain-containing protein	VRR_NUC+TM	Pseudomonas canadensis	Bacteria; Proteobacteria; Gammaproteobacteria; Pseudomonadales; Pseudomonadaceae; Pseudomonas
NZ_MOAO01000007.1	396114	396815	WP_123574313.1	BK637_RS27910	GCF_003731785.1	VRR-NUC domain-containing protein	VRR_NUC+TM	Pseudomonas chlororaphis	Bacteria; Proteobacteria; Gammaproteobacteria; Pseudomonadales; Pseudomonadaceae; Pseudomonas
NZ_MOBR01000019.1	175961	177244	WP_123598773.1	BK667_RS21160	GCF_003732705.1	VRR-NUC domain-containing protein	DUF3146+VRR_NUC+TM+TM	Pseudomonas frederiksbergensis	Bacteria; Proteobacteria; Gammaproteobacteria; Pseudomonadales; Pseudomonadaceae; Pseudomonas
NZ_RPDC01000003.1	25578	26327	WP_123850045.1	DF127_RS05595	GCF_003813825.1	VRR-NUC domain-containing protein	VRR_NUC	Burkholderia pseudomallei	Bacteria; Proteobacteria; Betaproteobacteria; Burkholderiales; Burkholderiaceae; Burkholderia; pseudomallei group
NZ_PQJL01000006.1	268755	270017	WP_123948271.1	C3E80_RS07700	GCF_003795605.1	VRR-NUC domain-containing protein	VRR_NUC	Cronobacter malonaticus	Bacteria; Proteobacteria; Gammaproteobacteria; Enterobacterales; Enterobacteriaceae; Cronobacter
NZ_CP033800.1	3528231	3529508	WP_123923271.1	EGY04_RS19020	GCF_003812145.1	VRR-NUC domain-containing protein	VRR_NUC+TM+TM	Enterobacter roggenkampii	Bacteria; Proteobacteria; Gammaproteobacteria; Enterobacterales; Enterobacteriaceae; Enterobacter; Enterobacter cloacae complex
NZ_NSNS01000001.1	113292	113993	WP_124075069.1	IPC1281_RS00550	GCF_003834185.1	VRR-NUC domain-containing protein	VRR_NUC+TM	Pseudomonas aeruginosa	Bacteria; Proteobacteria; Gammaproteobacteria; Pseudomonadales; Pseudomonadaceae; Pseudomonas
NZ_UWVR01000001.1	1870577	1871278	WP_124033587.1	EIK08_RS08835	GCF_900607565.1	VRR-NUC domain-containing protein	VRR_NUC	Pseudomonas aeruginosa	Bacteria; Proteobacteria; Gammaproteobacteria; Pseudomonadales; Pseudomonadaceae; Pseudomonas
NZ_UWYX01000002.1	3885348	3886088	WP_124083983.1	EIK58_RS33650	GCF_900608515.1	VRR-NUC domain-containing protein	VRR_NUC	Burkholderia gladioli	Bacteria; Proteobacteria; Betaproteobacteria; Burkholderiales; Burkholderiaceae; Burkholderia
NZ_NSNT01000002.1	152126	152758	WP_124098877.1	IPC1280_RS05045	GCF_003833685.1	VRR-NUC domain-containing protein	VRR_NUC+TM	Pseudomonas aeruginosa	Bacteria; Proteobacteria; Gammaproteobacteria; Pseudomonadales; Pseudomonadaceae; Pseudomonas
NZ_NSQS01000008.1	159174	159875	WP_124117723.1	IPC1035_RS17180	GCF_003835115.1	VRR-NUC domain-containing protein	VRR_NUC+TM	Pseudomonas aeruginosa	Bacteria; Proteobacteria; Gammaproteobacteria; Pseudomonadales; Pseudomonadaceae; Pseudomonas
NZ_UWYW01000001.1	229474	230223	WP_124093518.1	EIK60_RS01110	GCF_900608535.1	VRR-NUC domain-containing protein	VRR_NUC	Burkholderia gladioli	Bacteria; Proteobacteria; Betaproteobacteria; Burkholderiales; Burkholderiaceae; Burkholderia
NZ_UWYW01000001.1	268306	269058	WP_124093550.1	EIK60_RS01280	GCF_900608535.1	VRR-NUC domain-containing protein	VRR_NUC	Burkholderia gladioli	Bacteria; Proteobacteria; Betaproteobacteria; Burkholderiales; Burkholderiaceae; Burkholderia
NZ_UWYW01000001.1	3776576	3777319	WP_124094572.1	EIK60_RS17275	GCF_900608535.1	VRR-NUC domain-containing protein	DUF4776+VRR_NUC	Burkholderia gladioli	Bacteria; Proteobacteria; Betaproteobacteria; Burkholderiales; Burkholderiaceae; Burkholderia
NZ_NSRE01000003.1	365362	366069	WP_124119841.1	IPC1001_RS07310	GCF_003835165.1	VRR-NUC domain-containing protein	VRR_NUC	Pseudomonas aeruginosa	Bacteria; Proteobacteria; Gammaproteobacteria; Pseudomonadales; Pseudomonadaceae; Pseudomonas
NZ_NSRV01000018.1	107707	108408	WP_124124608.1	IPC962_RS27705	GCF_003835955.1	VRR-NUC domain-containing protein	VRR_NUC	Pseudomonas aeruginosa	Bacteria; Proteobacteria; Gammaproteobacteria; Pseudomonadales; Pseudomonadaceae; Pseudomonas
NZ_NSUE01000012.1	93	800	WP_124133004.1	IPC725_RS18795	GCF_003836705.1	VRR-NUC domain-containing protein	VRR_NUC	Pseudomonas aeruginosa	Bacteria; Proteobacteria; Gammaproteobacteria; Pseudomonadales; Pseudomonadaceae; Pseudomonas
NZ_NSUE01000015.1	99381	100088	WP_124133093.1	IPC725_RS22420	GCF_003836705.1	VRR-NUC domain-containing protein	VRR_NUC	Pseudomonas aeruginosa	Bacteria; Proteobacteria; Gammaproteobacteria; Pseudomonadales; Pseudomonadaceae; Pseudomonas
NZ_NSXU01000004.1	158766	159467	WP_124171849.1	IPC347_RS08220	GCF_003839285.1	VRR-NUC domain-containing protein	VRR_NUC+TM	Pseudomonas aeruginosa	Bacteria; Proteobacteria; Gammaproteobacteria; Pseudomonadales; Pseudomonadaceae; Pseudomonas
NZ_NSZK01000013.1	23324	24025	WP_124183157.1	IPC224_RS21980	GCF_003839985.1	VRR-NUC domain-containing protein	VRR_NUC+TM	Pseudomonas aeruginosa	Bacteria; Proteobacteria; Gammaproteobacteria; Pseudomonadales; Pseudomonadaceae; Pseudomonas
NZ_NTAB01000006.1	174243	174944	WP_124180677.1	IPC99_RS15300	GCF_003840165.1	VRR-NUC domain-containing protein	VRR_NUC+TM	Pseudomonas aeruginosa	Bacteria; Proteobacteria; Gammaproteobacteria; Pseudomonadales; Pseudomonadaceae; Pseudomonas
NZ_NSWZ01000003.1	401420	402127	WP_124199019.1	IPC436_RS09810	GCF_003840655.1	VRR-NUC domain-containing protein	VRR_NUC	Pseudomonas aeruginosa	Bacteria; Proteobacteria; Gammaproteobacteria; Pseudomonadales; Pseudomonadaceae; Pseudomonas
NZ_NSWZ01000003.1	607540	608241	WP_124199120.1	IPC436_RS10825	GCF_003840655.1	VRR-NUC domain-containing protein	VRR_NUC	Pseudomonas aeruginosa	Bacteria; Proteobacteria; Gammaproteobacteria; Pseudomonadales; Pseudomonadaceae; Pseudomonas
NZ_NSWZ01000020.1	101674	102348	WP_124200793.1	IPC436_RS27700	GCF_003840655.1	VRR-NUC domain-containing protein	VRR_NUC	Pseudomonas aeruginosa	Bacteria; Proteobacteria; Gammaproteobacteria; Pseudomonadales; Pseudomonadaceae; Pseudomonas
NZ_RHHM01000025.1	8299	9588	WP_124234888.1	EB241_RS20370	GCF_003846135.1	VRR-NUC domain-containing protein	VRR_NUC+TM+TM	Erwinia psidii	Bacteria; Proteobacteria; Gammaproteobacteria; Enterobacterales; Erwiniaceae; Erwinia
NZ_CP027753.1	3169077	3169778	WP_124320598.1	C4K04_RS14845	GCF_003851985.1	VRR-NUC domain-containing protein	VRR_NUC+TM	Pseudomonas chlororaphis	Bacteria; Proteobacteria; Gammaproteobacteria; Pseudomonadales; Pseudomonadaceae; Pseudomonas
NZ_CP027753.1	3375998	3377290	WP_124320734.1	C4K04_RS15715	GCF_003851985.1	VRR-NUC domain-containing protein	VRR_NUC+TM+TM	Pseudomonas chlororaphis	Bacteria; Proteobacteria; Gammaproteobacteria; Pseudomonadales; Pseudomonadaceae; Pseudomonas
NZ_CP027758.1	1138077	1139018	WP_124399421.1	C4J99_RS05060	GCF_003852025.1	VRR-NUC domain-containing protein	VRR_NUC	Pseudomonas synxantha	Bacteria; Proteobacteria; Gammaproteobacteria; Pseudomonadales; Pseudomonadaceae; Pseudomonas
NZ_CP027758.1	1139056	1139409	WP_124399422.1	C4J99_RS05065	GCF_003852025.1	hypothetical protein		Pseudomonas synxantha	Bacteria; Proteobacteria; Gammaproteobacteria; Pseudomonadales; Pseudomonadaceae; Pseudomonas
NZ_CP027758.1	2865458	2866336	WP_124400457.1	C4J99_RS12805	GCF_003852025.1	VRR-NUC domain-containing protein	VRR_NUC	Pseudomonas synxantha	Bacteria; Proteobacteria; Gammaproteobacteria; Pseudomonadales; Pseudomonadaceae; Pseudomonas
NZ_CP027757.1	2757732	2758610	WP_124412140.1	C4K00_RS12290	GCF_003851525.1	VRR-NUC domain-containing protein	VRR_NUC	Pseudomonas synxantha	Bacteria; Proteobacteria; Gammaproteobacteria; Pseudomonadales; Pseudomonadaceae; Pseudomonas
NZ_CP027724.1	2581717	2582595	WP_124423417.1	C4J97_RS11650	GCF_003851585.1	VRR-NUC domain-containing protein	VRR_NUC	Pseudomonas orientalis	Bacteria; Proteobacteria; Gammaproteobacteria; Pseudomonadales; Pseudomonadaceae; Pseudomonas
NZ_CP027724.1	2584161	2585039	WP_124423419.1	C4J97_RS11660	GCF_003851585.1	VRR-NUC domain-containing protein	VRR_NUC	Pseudomonas orientalis	Bacteria; Proteobacteria; Gammaproteobacteria; Pseudomonadales; Pseudomonadaceae; Pseudomonas
NZ_CP027725.1	3139653	3140531	WP_124426826.1	C4J96_RS14020	GCF_003851605.1	VRR-NUC domain-containing protein	VRR_NUC	Pseudomonas orientalis	Bacteria; Proteobacteria; Gammaproteobacteria; Pseudomonadales; Pseudomonadaceae; Pseudomonas
NZ_QTQI01000013.1	103303	104073	WP_124453303.1	DIE03_RS20035	GCF_003853705.1	VRR-NUC domain-containing protein	VRR_NUC	Burkholderia sp. Bp8992	Bacteria; Proteobacteria; Betaproteobacteria; Burkholderiales; Burkholderiaceae; Burkholderia
NZ_QTQI01000017.1	163358	164086	WP_124454729.1	DIE03_RS24160	GCF_003853705.1	VRR-NUC domain-containing protein	VRR_NUC	Burkholderia sp. Bp8992	Bacteria; Proteobacteria; Betaproteobacteria; Burkholderiales; Burkholderiaceae; Burkholderia
NZ_QTRI01000002.1	338214	339479	WP_124466254.1	DF045_RS04260	GCF_003853765.1	VRR-NUC domain-containing protein	TM+TM+VRR_NUC+TM+TM	Burkholderia cepacia	Bacteria; Proteobacteria; Betaproteobacteria; Burkholderiales; Burkholderiaceae; Burkholderia; Burkholderia cepacia complex
NZ_QTRI01000006.1	372661	374007	WP_124467434.1	DF045_RS11940	GCF_003853765.1	hypothetical protein	VRR_NUC	Burkholderia cepacia	Bacteria; Proteobacteria; Betaproteobacteria; Burkholderiales; Burkholderiaceae; Burkholderia; Burkholderia cepacia complex
NZ_QTSG01000033.1	10583	11347	WP_124477879.1	DF042_RS27050	GCF_003854095.1	VRR-NUC domain-containing protein	VRR_NUC	Burkholderia cenocepacia	Bacteria; Proteobacteria; Betaproteobacteria; Burkholderiales; Burkholderiaceae; Burkholderia; Burkholderia cepacia complex
NZ_QTON01000002.1	31432	32187	WP_124490191.1	DF138_RS01470	GCF_003853215.1	VRR-NUC domain-containing protein	VRR_NUC	Burkholderia stagnalis	Bacteria; Proteobacteria; Betaproteobacteria; Burkholderiales; Burkholderiaceae; Burkholderia; Burkholderia cepacia complex
NZ_QTOL01000018.1	81174	81878	WP_124482308.1	DF145_RS21210	GCF_003853255.1	VRR-NUC domain-containing protein	VRR_NUC	Burkholderia stagnalis	Bacteria; Proteobacteria; Betaproteobacteria; Burkholderiales; Burkholderiaceae; Burkholderia; Burkholderia cepacia complex
NZ_QTOL01000023.1	120632	121372	WP_124482823.1	DF145_RS25075	GCF_003853255.1	VRR-NUC domain-containing protein	VRR_NUC	Burkholderia stagnalis	Bacteria; Proteobacteria; Betaproteobacteria; Burkholderiales; Burkholderiaceae; Burkholderia; Burkholderia cepacia complex
NZ_QTPT01000009.1	58773	59492	WP_124507581.1	DIE18_RS13795	GCF_003853435.1	VRR-NUC domain-containing protein	DUF4776+VRR_NUC	Burkholderia sp. Bp9125	Bacteria; Proteobacteria; Betaproteobacteria; Burkholderiales; Burkholderiaceae; Burkholderia
NZ_QTQZ01000041.1	10513	11277	WP_124495831.1	DF035_RS34445	GCF_003854385.1	VRR-NUC domain-containing protein	VRR_NUC	Burkholderia contaminans	Bacteria; Proteobacteria; Betaproteobacteria; Burkholderiales; Burkholderiaceae; Burkholderia; Burkholderia cepacia complex
NZ_QTOG01000012.1	54657	55361	WP_124516441.1	DF162_RS12595	GCF_003853115.1	VRR-NUC domain-containing protein	VRR_NUC	Burkholderia stagnalis	Bacteria; Proteobacteria; Betaproteobacteria; Burkholderiales; Burkholderiaceae; Burkholderia; Burkholderia cepacia complex
NZ_QTOG01000012.1	117301	118071	WP_124516461.1	DF162_RS12910	GCF_003853115.1	nuclease	VRR_NUC	Burkholderia stagnalis	Bacteria; Proteobacteria; Betaproteobacteria; Burkholderiales; Burkholderiaceae; Burkholderia; Burkholderia cepacia complex
NZ_QTOG01000090.1	1599	2339	WP_124519344.1	DF162_RS34970	GCF_003853115.1	VRR-NUC domain-containing protein	VRR_NUC	Burkholderia stagnalis	Bacteria; Proteobacteria; Betaproteobacteria; Burkholderiales; Burkholderiaceae; Burkholderia; Burkholderia cepacia complex
NZ_LOSV01000123.1	430	1776	WP_124588402.1	WI25_RS20065	GCF_001522295.1	hypothetical protein	VRR_NUC	Burkholderia cepacia	Bacteria; Proteobacteria; Betaproteobacteria; Burkholderiales; Burkholderiaceae; Burkholderia; Burkholderia cepacia complex
NZ_QTRM01000001.1	393513	394775	WP_124587739.1	DF029_RS01720	GCF_003853955.1	VRR-NUC domain-containing protein	VRR_NUC+TM+TM	Burkholderia cepacia	Bacteria; Proteobacteria; Betaproteobacteria; Burkholderiales; Burkholderiaceae; Burkholderia; Burkholderia cepacia complex
NZ_QTRV01000015.1	187628	188335	WP_124550964.1	DF146_RS25815	GCF_003854595.1	VRR-NUC domain-containing protein	VRR_NUC	Burkholderia cenocepacia	Bacteria; Proteobacteria; Betaproteobacteria; Burkholderiales; Burkholderiaceae; Burkholderia; Burkholderia cepacia complex
NZ_QTOE01000079.1	2426	3154	WP_124597058.1	DF164_RS35780	GCF_003853135.1	VRR-NUC domain-containing protein	VRR_NUC	Burkholderia stagnalis	Bacteria; Proteobacteria; Betaproteobacteria; Burkholderiales; Burkholderiaceae; Burkholderia; Burkholderia cepacia complex
NZ_QTOH01000051.1	5511	6284	WP_124596664.1	DF161_RS32975	GCF_003853195.1	nuclease	VRR_NUC	Burkholderia stagnalis	Bacteria; Proteobacteria; Betaproteobacteria; Burkholderiales; Burkholderiaceae; Burkholderia; Burkholderia cepacia complex
NZ_QTPP01000055.1	16580	17350	WP_124607256.1	DIE22_RS35085	GCF_003853415.1	VRR-NUC domain-containing protein	VRR_NUC	Burkholderia sp. Bp9142	Bacteria; Proteobacteria; Betaproteobacteria; Burkholderiales; Burkholderiaceae; Burkholderia
NZ_QTQP01000002.1	265275	266030	WP_124597789.1	DID96_RS03090	GCF_003854275.1	VRR-NUC domain-containing protein	VRR_NUC	Burkholderia sp. Bp8963	Bacteria; Proteobacteria; Betaproteobacteria; Burkholderiales; Burkholderiaceae; Burkholderia
NZ_QTQP01000010.1	105676	106407	WP_124599375.1	DID96_RS11125	GCF_003854275.1	VRR-NUC domain-containing protein	VRR_NUC	Burkholderia sp. Bp8963	Bacteria; Proteobacteria; Betaproteobacteria; Burkholderiales; Burkholderiaceae; Burkholderia
NZ_LKPJ01000046.1	14023	14733	WP_124616002.1	AS146_RS33905	GCF_001443045.1	VRR-NUC domain-containing protein	VRR_NUC	Burkholderia ambifaria	Bacteria; Proteobacteria; Betaproteobacteria; Burkholderiales; Burkholderiaceae; Burkholderia; Burkholderia cepacia complex
NZ_QTPO01000036.1	18989	19717	WP_124614596.1	DIE23_RS25155	GCF_003853645.1	VRR-NUC domain-containing protein	VRR_NUC	Burkholderia sp. Bp9143	Bacteria; Proteobacteria; Betaproteobacteria; Burkholderiales; Burkholderiaceae; Burkholderia
NZ_QTQA01000002.1	329562	330266	WP_124621576.1	DIE11_RS03750	GCF_003853825.1	VRR-NUC domain-containing protein	VRR_NUC	Burkholderia sp. Bp9012	Bacteria; Proteobacteria; Betaproteobacteria; Burkholderiales; Burkholderiaceae; Burkholderia
NZ_QTRJ01000001.1	323726	324991	WP_124623678.1	DF043_RS01400	GCF_003854435.1	VRR-NUC domain-containing protein	VRR_NUC+TM+TM	Burkholderia cepacia	Bacteria; Proteobacteria; Betaproteobacteria; Burkholderiales; Burkholderiaceae; Burkholderia; Burkholderia cepacia complex
NZ_QTPS01000012.1	137858	138595	WP_124651252.1	DIE19_RS10300	GCF_003853715.1	VRR-NUC domain-containing protein	VRR_NUC	Burkholderia sp. Bp9126	Bacteria; Proteobacteria; Betaproteobacteria; Burkholderiales; Burkholderiaceae; Burkholderia
NZ_QTQF01000005.1	437	1831	WP_124660865.1	DIE06_RS07560	GCF_003854235.1	hypothetical protein	VRR_NUC	Burkholderia sp. Bp8998	Bacteria; Proteobacteria; Betaproteobacteria; Burkholderiales; Burkholderiaceae; Burkholderia
NZ_QTRG01000024.1	2999	3751	WP_124673538.1	DF050_RS28025	GCF_003854425.1	VRR-NUC domain-containing protein	VRR_NUC	Burkholderia cepacia	Bacteria; Proteobacteria; Betaproteobacteria; Burkholderiales; Burkholderiaceae; Burkholderia; Burkholderia cepacia complex
NZ_QTOE01000069.1	2339	3070	WP_124715512.1	DF164_RS35430	GCF_003853135.1	VRR-NUC domain-containing protein	VRR_NUC	Burkholderia stagnalis	Bacteria; Proteobacteria; Betaproteobacteria; Burkholderiales; Burkholderiaceae; Burkholderia; Burkholderia cepacia complex
NZ_QTSI01000023.1	1549	2319	WP_124680370.1	DF039_RS20200	GCF_003854735.1	VRR-NUC domain-containing protein	VRR_NUC	Burkholderia cenocepacia	Bacteria; Proteobacteria; Betaproteobacteria; Burkholderiales; Burkholderiaceae; Burkholderia; Burkholderia cepacia complex
NZ_QTSI01000024.1	6787	8082	WP_124680404.1	DF039_RS20715	GCF_003854735.1	VRR-NUC domain-containing protein	VRR_NUC+TM+TM	Burkholderia cenocepacia	Bacteria; Proteobacteria; Betaproteobacteria; Burkholderiales; Burkholderiaceae; Burkholderia; Burkholderia cepacia complex
NZ_QTSI01000079.1	17393	18016	WP_124681504.1	DF039_RS36030	GCF_003854735.1	hypothetical protein	VRR_NUC	Burkholderia cenocepacia	Bacteria; Proteobacteria; Betaproteobacteria; Burkholderiales; Burkholderiaceae; Burkholderia; Burkholderia cepacia complex
NZ_QTOU01000002.1	306212	306916	WP_124758862.1	DF118_RS03580	GCF_003857535.1	VRR-NUC domain-containing protein	VRR_NUC	Burkholderia stagnalis	Bacteria; Proteobacteria; Betaproteobacteria; Burkholderiales; Burkholderiaceae; Burkholderia; Burkholderia cepacia complex
NZ_PQJP01000028.1	6970	8271	WP_124813590.1	C3O73_RS01655	GCF_003858315.1	VRR-NUC domain-containing protein	VRR_NUC+TM+TM	Cronobacter sakazakii	Bacteria; Proteobacteria; Gammaproteobacteria; Enterobacterales; Enterobacteriaceae; Cronobacter
NZ_QTOT01000009.1	22598	23302	WP_124823448.1	DF119_RS11910	GCF_003857555.1	VRR-NUC domain-containing protein	VRR_NUC	Burkholderia stagnalis	Bacteria; Proteobacteria; Betaproteobacteria; Burkholderiales; Burkholderiaceae; Burkholderia; Burkholderia cepacia complex
NZ_QTPY01000059.1	3129	4391	WP_124831006.1	DIE13_RS32215	GCF_003857765.1	VRR-NUC domain-containing protein	VRR_NUC+TM+TM	Burkholderia sp. Bp9016	Bacteria; Proteobacteria; Betaproteobacteria; Burkholderiales; Burkholderiaceae; Burkholderia
NZ_QTOZ01000079.1	5329	6057	WP_124831295.1	DF113_RS34645	GCF_003857875.1	VRR-NUC domain-containing protein	VRR_NUC	Burkholderia stagnalis	Bacteria; Proteobacteria; Betaproteobacteria; Burkholderiales; Burkholderiaceae; Burkholderia; Burkholderia cepacia complex
NZ_QTPW01000008.1	2028	3422	WP_124833404.1	DIE15_RS12710	GCF_003857965.1	VRR-NUC domain-containing protein	VRR_NUC	Burkholderia sp. Bp9031	Bacteria; Proteobacteria; Betaproteobacteria; Burkholderiales; Burkholderiaceae; Burkholderia
NZ_QTQU01000002.1	987	1694	WP_124836145.1	DF052_RS01900	GCF_003858055.1	VRR-NUC domain-containing protein	VRR_NUC	Burkholderia glumae	Bacteria; Proteobacteria; Betaproteobacteria; Burkholderiales; Burkholderiaceae; Burkholderia
NZ_QTQU01000006.1	191279	192010	WP_124836603.1	DF052_RS08990	GCF_003858055.1	VRR-NUC domain-containing protein	DUF4776+VRR_NUC	Burkholderia glumae	Bacteria; Proteobacteria; Betaproteobacteria; Burkholderiales; Burkholderiaceae; Burkholderia
NZ_QTRF01000001.1	404223	405488	WP_124838431.1	DF053_RS01760	GCF_003858195.1	VRR-NUC domain-containing protein	TM+TM+VRR_NUC+TM+TM	Burkholderia cepacia	Bacteria; Proteobacteria; Betaproteobacteria; Burkholderiales; Burkholderiaceae; Burkholderia; Burkholderia cepacia complex
NZ_QTSC01000013.1	151939	152667	WP_124846490.1	DF059_RS19360	GCF_003858255.1	VRR-NUC domain-containing protein	VRR_NUC	Burkholderia cenocepacia	Bacteria; Proteobacteria; Betaproteobacteria; Burkholderiales; Burkholderiaceae; Burkholderia; Burkholderia cepacia complex
NZ_QTQE01000026.1	1387	2127	WP_124883683.1	DIE07_RS25725	GCF_003857485.1	VRR-NUC domain-containing protein	VRR_NUC	Burkholderia sp. Bp9002	Bacteria; Proteobacteria; Betaproteobacteria; Burkholderiales; Burkholderiaceae; Burkholderia
NZ_QTQD01000010.1	146453	147217	WP_124902246.1	DIE08_RS14155	GCF_003858025.1	VRR-NUC domain-containing protein	VRR_NUC	Burkholderia sp. Bp9004	Bacteria; Proteobacteria; Betaproteobacteria; Burkholderiales; Burkholderiaceae; Burkholderia
NZ_QTRL01000023.1	26727	28073	WP_124923541.1	DF038_RS27585	GCF_003858205.1	hypothetical protein	VRR_NUC	Burkholderia cepacia	Bacteria; Proteobacteria; Betaproteobacteria; Burkholderiales; Burkholderiaceae; Burkholderia; Burkholderia cepacia complex
NZ_RHRY01000117.1	681	1979	WP_125312101.1	EGJ48_RS23040	GCF_003936175.1	VRR-NUC domain-containing protein	VRR_NUC+TM+TM	Pantoea dispersa	Bacteria; Proteobacteria; Gammaproteobacteria; Enterobacterales; Erwiniaceae; Pantoea
NZ_RHWT01000004.1	13945	15234	WP_125364747.1	EGK68_RS04735	GCF_003938165.1	VRR-NUC domain-containing protein	VRR_NUC+TM+TM	Enterobacter cloacae	Bacteria; Proteobacteria; Gammaproteobacteria; Enterobacterales; Enterobacteriaceae; Enterobacter; Enterobacter cloacae complex
NZ_RHWT01000088.1	1909	3201	WP_125366819.1	EGK68_RS25665	GCF_003938165.1	VRR-NUC domain-containing protein	VRR_NUC+TM	Enterobacter cloacae	Bacteria; Proteobacteria; Gammaproteobacteria; Enterobacterales; Enterobacteriaceae; Enterobacter; Enterobacter cloacae complex
NZ_RFES01000011.1	82139	83137	WP_125699605.1	EA756_RS15340	GCF_003948005.1	hypothetical protein	RE_Bpu10I+VRR_NUC	Acinetobacter lactucae	Bacteria; Proteobacteria; Gammaproteobacteria; Moraxellales; Moraxellaceae; Acinetobacter; Acinetobacter calcoaceticus/baumannii complex
NZ_JAHPMQ010000004.1	298057	298761	WP_126242660.1	KTE24_RS08795	GCF_019040495.1	VRR-NUC domain-containing protein	VRR_NUC	Burkholderia gladioli	Bacteria; Proteobacteria; Betaproteobacteria; Burkholderiales; Burkholderiaceae; Burkholderia
NZ_UZVW01000004.1	450778	451509	WP_126285111.1	ELZ54_RS22810	GCF_900631665.1	VRR-NUC domain-containing protein	VRR_NUC	Burkholderia anthina	Bacteria; Proteobacteria; Betaproteobacteria; Burkholderiales; Burkholderiaceae; Burkholderia; Burkholderia cepacia complex
NZ_UZVX01000004.1	176373	177143	WP_126226944.1	ELY51_RS20740	GCF_900631675.1	VRR-NUC domain-containing protein	VRR_NUC	Burkholderia ambifaria	Bacteria; Proteobacteria; Betaproteobacteria; Burkholderiales; Burkholderiaceae; Burkholderia; Burkholderia cepacia complex
NZ_RXYL01000007.1	966	2243	WP_126324732.1	EKS39_RS01935	GCF_003968775.1	VRR-NUC domain-containing protein	VRR_NUC+TM+TM	Enterobacter roggenkampii	Bacteria; Proteobacteria; Gammaproteobacteria; Enterobacterales; Enterobacteriaceae; Enterobacter; Enterobacter cloacae complex
NZ_RXSJ01000006.1	183600	184889	WP_126534695.1	EKO03_RS15610	GCF_003964805.1	VRR-NUC domain-containing protein	VRR_NUC+TM+TM	Enterobacter quasiroggenkampii	Bacteria; Proteobacteria; Gammaproteobacteria; Enterobacterales; Enterobacteriaceae; Enterobacter
NZ_RXWA01000112.1	9643	10344	WP_126577580.1	DZA05_RS23010	GCF_003969795.1	VRR-NUC domain-containing protein	VRR_NUC+TM	Pseudomonas aeruginosa	Bacteria; Proteobacteria; Gammaproteobacteria; Pseudomonadales; Pseudomonadaceae; Pseudomonas
NZ_RXTE01000096.1	6237	6944	WP_126586766.1	DY933_RS22185	GCF_003968045.1	VRR-NUC domain-containing protein	VRR_NUC	Pseudomonas aeruginosa	Bacteria; Proteobacteria; Gammaproteobacteria; Pseudomonadales; Pseudomonadaceae; Pseudomonas
NZ_RXWQ01000007.1	169059	169760	WP_126589897.1	DZA21_RS08550	GCF_003970055.1	VRR-NUC domain-containing protein	VRR_NUC+TM	Pseudomonas aeruginosa	Bacteria; Proteobacteria; Gammaproteobacteria; Pseudomonadales; Pseudomonadaceae; Pseudomonas
NZ_RXWL01000067.1	538	1239	WP_126584910.1	DZA16_RS16300	GCF_003970065.1	VRR-NUC domain-containing protein	VRR_NUC+TM	Pseudomonas aeruginosa	Bacteria; Proteobacteria; Gammaproteobacteria; Pseudomonadales; Pseudomonadaceae; Pseudomonas
NZ_PNSJ01000011.1	20917	22206	WP_126654748.1	CXX31_RS09605	GCF_003980635.1	VRR-NUC domain-containing protein	VRR_NUC+TM+TM	Escherichia coli	Bacteria; Proteobacteria; Gammaproteobacteria; Enterobacterales; Enterobacteriaceae; Escherichia
NZ_POAS01000066.1	19067	20350	WP_126723082.1	CXV57_RS21755	GCF_003982485.1	VRR-NUC domain-containing protein	VRR_NUC+TM+TM	Escherichia coli	Bacteria; Proteobacteria; Gammaproteobacteria; Enterobacterales; Enterobacteriaceae; Escherichia
NZ_RWKH01000005.1	219155	220222	WP_126746732.1	EJI00_RS06925	GCF_003984625.1	hypothetical protein		Variovorax sp. DXTD-1	Bacteria; Proteobacteria; Betaproteobacteria; Burkholderiales; Comamonadaceae; Variovorax
NZ_RXDW01000009.1	33146	33847	WP_126868515.1	IPC451_RS16730	GCF_003975555.1	VRR-NUC domain-containing protein	VRR_NUC+TM	Pseudomonas aeruginosa	Bacteria; Proteobacteria; Gammaproteobacteria; Pseudomonadales; Pseudomonadaceae; Pseudomonas
NZ_RJZE01000012.1	13290	14024	WP_126877596.1	PKKP23_RS15715	GCF_003986935.1	VRR-NUC domain-containing protein	VRR_NUC	Paraburkholderia kururiensis JCM 10599 = LMG 19447	Bacteria; Proteobacteria; Betaproteobacteria; Burkholderiales; Burkholderiaceae; Paraburkholderia
NZ_CP034689.1	52248	53075	WP_127183058.1	ELS24_RS00235	GCF_003994415.1	VRR-NUC domain-containing protein	VRR_NUC	Achromobacter spanius	Bacteria; Proteobacteria; Betaproteobacteria; Burkholderiales; Alcaligenaceae; Achromobacter
NZ_CP034689.1	3060002	3060835	WP_127184475.1	ELS24_RS14125	GCF_003994415.1	VRR-NUC domain-containing protein	SP+VRR_NUC	Achromobacter spanius	Bacteria; Proteobacteria; Betaproteobacteria; Burkholderiales; Alcaligenaceae; Achromobacter
NZ_RZVK01000006.1	5006	6289	WP_127766461.1	EOL14_RS01495	GCF_004004915.1	VRR-NUC domain-containing protein	VRR_NUC+TM+TM	Escherichia coli	Bacteria; Proteobacteria; Gammaproteobacteria; Enterobacterales; Enterobacteriaceae; Escherichia
NZ_CP028291.1	595229	595975	WP_128098970.1	C8234_RS01440	GCF_003029705.1	hypothetical protein	VRR_NUC+Pal1	Acidovorax avenae subsp. avenae	Bacteria; Proteobacteria; Betaproteobacteria; Burkholderiales; Comamonadaceae; Acidovorax
NZ_SAUF01000005.1	2631	3416	WP_128293456.1	EO094_RS14225	GCF_004023665.1	hypothetical protein	SP	Afifella aestuarii	Bacteria; Proteobacteria; Alphaproteobacteria; Hyphomicrobiales; Afifellaceae; Afifella
NZ_MDEJ01000023.1	14943	15638	WP_128416370.1	XpopCFBP1817_RS05685	GCF_002940065.1	VRR-NUC domain-containing protein	VRR_NUC	Xanthomonas populi	Bacteria; Proteobacteria; Gammaproteobacteria; Xanthomonadales; Xanthomonadaceae; Xanthomonas
NZ_SBHW01000056.1	48547	50046	WP_128403449.1	EHI45_RS22165	GCF_004028075.1	DUF4150 domain-containing protein	Tox-PAAR-like	Rhizobium leguminosarum	Bacteria; Proteobacteria; Alphaproteobacteria; Hyphomicrobiales; Rhizobiaceae; Rhizobium/Agrobacterium group; Rhizobium
NZ_SBHX01000044.1	42901	44400	WP_128411141.1	EHI47_RS18510	GCF_004028185.1	DUF4150 domain-containing protein	Tox-PAAR-like	Rhizobium leguminosarum	Bacteria; Proteobacteria; Alphaproteobacteria; Hyphomicrobiales; Rhizobiaceae; Rhizobium/Agrobacterium group; Rhizobium
NZ_LAEI01000019.1	505	1629	WP_128580562.1	TW89_RS03500	GCF_001618065.1	VRR-NUC domain-containing protein	VRR_NUC+TM+TM	Neisseria flavescens	Bacteria; Proteobacteria; Betaproteobacteria; Neisseriales; Neisseriaceae; Neisseria
NZ_LAEI01000033.1	28087	29646	WP_128580687.1	TW89_RS04630	GCF_001618065.1	hypothetical protein	TM	Neisseria flavescens	Bacteria; Proteobacteria; Betaproteobacteria; Neisseriales; Neisseriaceae; Neisseria
NZ_MCMO01000006.1	162882	163580	WP_128552467.1	IPC95_RS18720	GCF_003698765.1	VRR-NUC domain-containing protein	VRR_NUC	Pseudomonas aeruginosa	Bacteria; Proteobacteria; Gammaproteobacteria; Pseudomonadales; Pseudomonadaceae; Pseudomonas
NZ_NSMU01000005.1	366804	367505	WP_128569928.1	IPC1352_RS16010	GCF_003833965.1	VRR-NUC domain-containing protein	VRR_NUC+TM	Pseudomonas aeruginosa	Bacteria; Proteobacteria; Gammaproteobacteria; Pseudomonadales; Pseudomonadaceae; Pseudomonas
NZ_NSOL01000008.1	170629	171330	WP_128652274.1	IPC1219_RS20455	GCF_003835335.1	VRR-NUC domain-containing protein	VRR_NUC+TM	Pseudomonas aeruginosa	Bacteria; Proteobacteria; Gammaproteobacteria; Pseudomonadales; Pseudomonadaceae; Pseudomonas
NZ_RXBN01000014.1	158519	159220	WP_128684004.1	IPC1356_RS20400	GCF_003974895.1	VRR-NUC domain-containing protein	VRR_NUC+TM	Pseudomonas aeruginosa	Bacteria; Proteobacteria; Gammaproteobacteria; Pseudomonadales; Pseudomonadaceae; Pseudomonas
NZ_RXEV01000006.1	192632	193333	WP_128682034.1	IPC367_RS14845	GCF_003976545.1	VRR-NUC domain-containing protein	VRR_NUC+TM	Pseudomonas aeruginosa	Bacteria; Proteobacteria; Gammaproteobacteria; Pseudomonadales; Pseudomonadaceae; Pseudomonas
NZ_RXEI01000008.1	172507	173208	WP_128682930.1	IPC412_RS20595	GCF_003976765.1	VRR-NUC domain-containing protein	VRR_NUC+TM	Pseudomonas aeruginosa	Bacteria; Proteobacteria; Gammaproteobacteria; Pseudomonadales; Pseudomonadaceae; Pseudomonas
NZ_MQRG01000019.1	88711	89799	WP_128865614.1	BSQ35_RS23305	GCF_001908115.1	VRR-NUC domain-containing protein	VRR_NUC+TM+TM	Serratia liquefaciens	Bacteria; Proteobacteria; Gammaproteobacteria; Enterobacterales; Yersiniaceae; Serratia
NZ_CP012670.1	1519178	1521853	WP_129346041.1	SOCEGT47_RS05815	GCF_004135735.1	type VI secretion system tip protein VgrG	Phage_GPD+Phage_base_V+VRR_NUC	Sorangium cellulosum	Bacteria; Proteobacteria; Deltaproteobacteria; Myxococcales; Sorangiineae; Polyangiaceae; Sorangium
NZ_CP012670.1	1526894	1529587	WP_129346049.1	SOCEGT47_RS05840	GCF_004135735.1	type VI secretion system tip protein VgrG	Phage_GPD+Phage_base_V+VRR_NUC	Sorangium cellulosum	Bacteria; Proteobacteria; Deltaproteobacteria; Myxococcales; Sorangiineae; Polyangiaceae; Sorangium
NZ_CP012670.1	7135723	7138389	WP_129351461.1	SOCEGT47_RS26895	GCF_004135735.1	type VI secretion system tip protein VgrG	Phage_GPD+Phage_base_V+VRR_NUC	Sorangium cellulosum	Bacteria; Proteobacteria; Deltaproteobacteria; Myxococcales; Sorangiineae; Polyangiaceae; Sorangium
NZ_MZMU01000018.1	49693	50664	WP_129421077.1	B5P46_RS24990	GCF_004123835.1	DUF4150 domain-containing protein	Tox-PAAR-like+VRR_NUC	Rhizobium leguminosarum	Bacteria; Proteobacteria; Alphaproteobacteria; Hyphomicrobiales; Rhizobiaceae; Rhizobium/Agrobacterium group; Rhizobium
NZ_CP024866.1	5939860	5941161	WP_129444295.1	CUN63_RS28145	GCF_004136015.1	VRR-NUC domain-containing protein	VRR_NUC+TM+TM+TM	Pseudomonas sp. ACM7	Bacteria; Proteobacteria; Gammaproteobacteria; Pseudomonadales; Pseudomonadaceae; Pseudomonas
NZ_CP025781.1	33813	34703	WP_130104757.1	C1H71_RS00175	GCF_004194535.1	VRR-NUC domain-containing protein	VRR_NUC+TM+TM	Iodobacter fluviatilis	Bacteria; Proteobacteria; Betaproteobacteria; Neisseriales; Chromobacteriaceae; Iodobacter
NZ_RHJR01000001.1	47975	49258	WP_130221321.1	D9597_RS00235	GCF_004212325.1	VRR-NUC domain-containing protein	VRR_NUC+TM+TM	Escherichia sp. E13S3	Bacteria; Proteobacteria; Gammaproteobacteria; Enterobacterales; Enterobacteriaceae; Escherichia
NZ_SHIU01000091.1	4078	5367	WP_130560463.1	EXX39_RS24525	GCF_004284265.1	VRR-NUC domain-containing protein	VRR_NUC+TM+TM	Escherichia coli	Bacteria; Proteobacteria; Gammaproteobacteria; Enterobacterales; Enterobacteriaceae; Escherichia
NZ_SIWH01000020.1	47493	48860	WP_131065894.1	EYZ49_RS23310	GCF_004310515.1	Uma2 family endonuclease		Salmonella enterica subsp. salamae serovar 13,22:z:-	Bacteria; Proteobacteria; Gammaproteobacteria; Enterobacterales; Enterobacteriaceae; Salmonella
NZ_CP036254.1	3647649	3648344	WP_131083889.1	EYC55_RS17080	GCF_004319465.1	VRR-NUC domain-containing protein	VRR_NUC	Xanthomonas oryzae	Bacteria; Proteobacteria; Gammaproteobacteria; Xanthomonadales; Xanthomonadaceae; Xanthomonas
NZ_CP036256.1	3456600	3457295	WP_131075589.1	EYC57_RS16255	GCF_004319505.1	VRR-NUC domain-containing protein	VRR_NUC	Xanthomonas oryzae	Bacteria; Proteobacteria; Gammaproteobacteria; Xanthomonadales; Xanthomonadaceae; Xanthomonas
NZ_QJUK01000004.1	271294	271995	WP_131178218.1	DNJ99_RS07135	GCF_004327185.1	VRR-NUC domain-containing protein	VRR_NUC	Pseudomonas daroniae	Bacteria; Proteobacteria; Gammaproteobacteria; Pseudomonadales; Pseudomonadaceae; Pseudomonas
NZ_JZZW01000018.1	140221	141213	WP_131631763.1	SS08_RS24925	GCF_000957775.1	hypothetical protein		Enterobacter hormaechei subsp. steigerwaltii	Bacteria; Proteobacteria; Gammaproteobacteria; Enterobacterales; Enterobacteriaceae; Enterobacter; Enterobacter cloacae complex
NZ_JZZW01000018.1	141201	141506	WP_158003165.1	SS08_RS26680	GCF_000957775.1	hypothetical protein		Enterobacter hormaechei subsp. steigerwaltii	Bacteria; Proteobacteria; Gammaproteobacteria; Enterobacterales; Enterobacteriaceae; Enterobacter; Enterobacter cloacae complex
NZ_SJOO01000010.1	165039	166316	WP_131635360.1	E0L20_RS19345	GCF_004331265.1	VRR-NUC domain-containing protein	VRR_NUC+TM+TM	Enterobacter wuhouensis	Bacteria; Proteobacteria; Gammaproteobacteria; Enterobacterales; Enterobacteriaceae; Enterobacter
NZ_PTXL01000007.1	145386	146162	WP_132023434.1	C5O80_RS22975	GCF_004343775.1	nuclease	VRR_NUC	Burkholderia sp. SRS-46	Bacteria; Proteobacteria; Betaproteobacteria; Burkholderiales; Burkholderiaceae; Burkholderia
NZ_QAOP01000043.1	1332	2030	WP_132384657.1	C8K19_RS33150	GCF_003050715.1	hypothetical protein	TM	Paraburkholderia sp. GV072	Bacteria; Proteobacteria; Betaproteobacteria; Burkholderiales; Burkholderiaceae; Paraburkholderia
NZ_PUJY01000010.1	114579	115937	WP_132354014.1	C5467_RS08445	GCF_004348755.1	VRR-NUC domain-containing protein	VRR_NUC+TM+TM	Photorhabdus khanii subsp. guanajuatensis	Bacteria; Proteobacteria; Gammaproteobacteria; Enterobacterales; Morganellaceae; Photorhabdus
NZ_PUJY01000037.1	46600	47955	WP_132355560.1	C5467_RS17885	GCF_004348755.1	VRR-NUC domain-containing protein	VRR_NUC+TM+TM	Photorhabdus khanii subsp. guanajuatensis	Bacteria; Proteobacteria; Gammaproteobacteria; Enterobacterales; Morganellaceae; Photorhabdus
NZ_PUJY01000048.1	4384	5742	WP_132355859.1	C5467_RS19765	GCF_004348755.1	VRR-NUC domain-containing protein	VRR_NUC+TM+TM	Photorhabdus khanii subsp. guanajuatensis	Bacteria; Proteobacteria; Gammaproteobacteria; Enterobacterales; Morganellaceae; Photorhabdus
NZ_PUJY01000094.1	3949	5301	WP_132356382.1	C5467_RS23370	GCF_004348755.1	VRR-NUC domain-containing protein	VRR_NUC+TM+TM	Photorhabdus khanii subsp. guanajuatensis	Bacteria; Proteobacteria; Gammaproteobacteria; Enterobacterales; Morganellaceae; Photorhabdus
NZ_PUJX01000021.1	50364	51722	WP_132347259.1	C5468_RS18290	GCF_004348775.1	VRR-NUC domain-containing protein	VRR_NUC+TM+TM	Photorhabdus luminescens subsp. mexicana	Bacteria; Proteobacteria; Gammaproteobacteria; Enterobacterales; Morganellaceae; Photorhabdus
NZ_PUJX01000033.1	44472	45424	WP_132348084.1	C5468_RS21570	GCF_004348775.1	VRR-NUC domain-containing protein	VRR_NUC+TM+TM	Photorhabdus luminescens subsp. mexicana	Bacteria; Proteobacteria; Gammaproteobacteria; Enterobacterales; Morganellaceae; Photorhabdus
NZ_PUJX01000036.1	36260	37212	WP_132348226.1	C5468_RS22150	GCF_004348775.1	VRR-NUC domain-containing protein	VRR_NUC+TM+TM	Photorhabdus luminescens subsp. mexicana	Bacteria; Proteobacteria; Gammaproteobacteria; Enterobacterales; Morganellaceae; Photorhabdus
NZ_SCXU01000326.1	4437	5144	WP_132713363.1	EQ642_RS26415	GCF_004350615.1	VRR-NUC domain-containing protein	VRR_NUC	Pseudomonas aeruginosa	Bacteria; Proteobacteria; Gammaproteobacteria; Pseudomonadales; Pseudomonadaceae; Pseudomonas
NZ_SCXU01000333.1	5119	5826	WP_132713417.1	EQ642_RS26695	GCF_004350615.1	VRR-NUC domain-containing protein	VRR_NUC	Pseudomonas aeruginosa	Bacteria; Proteobacteria; Gammaproteobacteria; Pseudomonadales; Pseudomonadaceae; Pseudomonas
NZ_SMMJ01000006.1	1035	1790	WP_133072467.1	EZI45_RS04790	GCF_004353655.1	hypothetical protein		Delftia tsuruhatensis	Bacteria; Proteobacteria; Betaproteobacteria; Burkholderiales; Comamonadaceae; Delftia
NZ_CP033196.1	1181311	1182006	WP_133265209.1	EBA17_RS06110	GCF_004355785.1	VRR-NUC domain-containing protein	VRR_NUC	Xanthomonas oryzae pv. oryzae	Bacteria; Proteobacteria; Gammaproteobacteria; Xanthomonadales; Xanthomonadaceae; Xanthomonas
NZ_SMSC01000003.1	125489	126640	WP_133510457.1	E1958_RS20745	GCF_004359955.1	DUF4150 domain-containing protein	Tox-PAAR-like	Candidatus Thiosymbion oneisti	Bacteria; Proteobacteria; Gammaproteobacteria; Chromatiales; Chromatiaceae; Candidatus Thiosymbion
NZ_SMRO01000001.1	84101	84970	WP_133645180.1	E1748_RS00370	GCF_004359985.1	VRR-NUC domain-containing protein	VRR_NUC+TM	Paraburkholderia sp. LD6	Bacteria; Proteobacteria; Betaproteobacteria; Burkholderiales; Burkholderiaceae; Paraburkholderia
NZ_PUJU01000002.1	78680	80041	WP_133815092.1	C5471_RS01025	GCF_011189505.1	VRR-NUC domain-containing protein	VRR_NUC+TM+TM	Photorhabdus tasmaniensis	Bacteria; Proteobacteria; Gammaproteobacteria; Enterobacterales; Morganellaceae; Photorhabdus
NZ_PUJU01000034.1	10531	11892	WP_133814732.1	C5471_RS15370	GCF_011189505.1	VRR-NUC domain-containing protein	VRR_NUC+TM+TM	Photorhabdus tasmaniensis	Bacteria; Proteobacteria; Gammaproteobacteria; Enterobacterales; Morganellaceae; Photorhabdus
NZ_PUJU01000115.1	791	2149	WP_133813397.1	C5471_RS22845	GCF_011189505.1	VRR-NUC domain-containing protein	VRR_NUC+TM+TM	Photorhabdus tasmaniensis	Bacteria; Proteobacteria; Gammaproteobacteria; Enterobacterales; Morganellaceae; Photorhabdus
NZ_CP037993.1	194064	195143	WP_134221054.1	E2K99_RS00955	GCF_004367745.1	DUF4150 domain-containing protein	Tox-PAAR-like	Herbaspirillum huttiense	Bacteria; Proteobacteria; Betaproteobacteria; Burkholderiales; Oxalobacteraceae; Herbaspirillum
NZ_CP037993.1	4771894	4772811	WP_134223479.1	E2K99_RS21325	GCF_004367745.1	hypothetical protein	VRR_NUC+TM+TM	Herbaspirillum huttiense	Bacteria; Proteobacteria; Betaproteobacteria; Burkholderiales; Oxalobacteraceae; Herbaspirillum
NZ_SNSR01000016.1	139160	139921	WP_134256317.1	E3D36_RS16975	GCF_004374695.1	VRR-NUC domain-containing protein	VRR_NUC	Burkholderia cepacia	Bacteria; Proteobacteria; Betaproteobacteria; Burkholderiales; Burkholderiaceae; Burkholderia; Burkholderia cepacia complex
NZ_RWUB01000003.1	347598	348296	WP_134278750.1	IPC65_RS07860	GCF_004374405.1	VRR-NUC domain-containing protein	VRR_NUC	Pseudomonas aeruginosa	Bacteria; Proteobacteria; Gammaproteobacteria; Pseudomonadales; Pseudomonadaceae; Pseudomonas
NZ_RWPZ01000007.1	103983	104684	WP_134316779.1	IPC608_RS17015	GCF_004372375.1	VRR-NUC domain-containing protein	VRR_NUC+TM	Pseudomonas aeruginosa	Bacteria; Proteobacteria; Gammaproteobacteria; Pseudomonadales; Pseudomonadaceae; Pseudomonas
NZ_RWUA01000011.1	66227	66925	WP_134323557.1	IPC66_RS21200	GCF_004374415.1	VRR-NUC domain-containing protein	VRR_NUC	Pseudomonas aeruginosa	Bacteria; Proteobacteria; Gammaproteobacteria; Pseudomonadales; Pseudomonadaceae; Pseudomonas
NZ_ARVC01000018.1	56029	56907	WP_134334270.1	F638_RS25010	GCF_004382095.1	VRR-NUC domain-containing protein	VRR_NUC	Pseudomonas sp. LAIL14HWK12:I2	Bacteria; Proteobacteria; Gammaproteobacteria; Pseudomonadales; Pseudomonadaceae; Pseudomonas
NZ_CAADKI010000063.1	2360	3061	WP_134543344.1	E4Y84_RS05100	GCF_900707145.1	VRR-NUC domain-containing protein	VRR_NUC+TM	Pseudomonas aeruginosa	Bacteria; Proteobacteria; Gammaproteobacteria; Pseudomonadales; Pseudomonadaceae; Pseudomonas
NZ_JAIQKK010000010.1	187828	188526	WP_134584283.1	LC626_RS20640	GCF_020036535.1	VRR-NUC domain-containing protein	VRR_NUC	Pseudomonas aeruginosa	Bacteria; Proteobacteria; Gammaproteobacteria; Pseudomonadales; Pseudomonadaceae; Pseudomonas
NZ_CAADPF010001218.1	1225	1926	WP_134611397.1	E4013_RS32955	GCF_900708415.1	VRR-NUC domain-containing protein	VRR_NUC+TM	Pseudomonas aeruginosa	Bacteria; Proteobacteria; Gammaproteobacteria; Pseudomonadales; Pseudomonadaceae; Pseudomonas
NZ_NROK01000046.1	10830	12131	WP_134879564.1	CI912_RS10880	GCF_002979055.1	VRR-NUC domain-containing protein	VRR_NUC+TM+TM	Cronobacter dublinensis	Bacteria; Proteobacteria; Gammaproteobacteria; Enterobacterales; Enterobacteriaceae; Cronobacter
NZ_CP038469.1	4095862	4097130	WP_135324286.1	E4Z61_RS20310	GCF_004684345.1	VRR-NUC domain-containing protein	VRR_NUC	Citrobacter tructae	Bacteria; Proteobacteria; Gammaproteobacteria; Enterobacterales; Enterobacteriaceae; Citrobacter
NZ_CP038469.1	4186245	4187528	WP_135324354.1	E4Z61_RS20720	GCF_004684345.1	VRR-NUC domain-containing protein	VRR_NUC+TM+TM	Citrobacter tructae	Bacteria; Proteobacteria; Gammaproteobacteria; Enterobacterales; Enterobacteriaceae; Citrobacter
NZ_SRIN01000058.1	25427	26155	WP_135351411.1	C6946_RS15495	GCF_004684955.1	VRR-NUC domain-containing protein	VRR_NUC	Burkholderia thailandensis	Bacteria; Proteobacteria; Betaproteobacteria; Burkholderiales; Burkholderiaceae; Burkholderia; pseudomallei group
NZ_PDHY01000037.1	19489	20772	WP_135523294.1	CRI69_RS16415	GCF_004745255.1	VRR-NUC domain-containing protein	VRR_NUC+TM+TM	Escherichia sp. E4742	Bacteria; Proteobacteria; Gammaproteobacteria; Enterobacterales; Enterobacteriaceae; Escherichia
NZ_JYUO01000050.1	83951	84136	WP_136160138.1	DD63_RS27355	GCF_001478855.1	hypothetical protein		Salmonella enterica subsp. enterica serovar 4,12:d:-	Bacteria; Proteobacteria; Gammaproteobacteria; Enterobacterales; Enterobacteriaceae; Salmonella
NZ_SSMQ01000031.1	107084	108373	WP_136932004.1	E8A74_RS27255	GCF_005144585.1	hypothetical protein	VRR_NUC	Polyangium fumosum	Bacteria; Proteobacteria; Deltaproteobacteria; Myxococcales; Sorangiineae; Polyangiaceae; Polyangium
NZ_BFGC01000024.1	14861	16150	WP_137422257.1	FE860_RS08875	GCF_005381625.1	VRR-NUC domain-containing protein	VRR_NUC+TM+TM	Escherichia coli	Bacteria; Proteobacteria; Gammaproteobacteria; Enterobacterales; Enterobacteriaceae; Escherichia
NZ_BFWG01000034.1	14793	16082	WP_137499783.1	FFF94_RS12295	GCF_005390145.1	VRR-NUC domain-containing protein	VRR_NUC+TM+TM	Escherichia coli	Bacteria; Proteobacteria; Gammaproteobacteria; Enterobacterales; Enterobacteriaceae; Escherichia
NZ_BGAJ01000123.1	29177	30466	WP_137540173.1	FFI02_RS26165	GCF_005392285.1	VRR-NUC domain-containing protein	VRR_NUC+TM+TM	Escherichia coli	Bacteria; Proteobacteria; Gammaproteobacteria; Enterobacterales; Enterobacteriaceae; Escherichia
NZ_BGHX01000119.1	12787	14076	WP_137566662.1	FFK43_RS17575	GCF_005396645.1	VRR-NUC domain-containing protein	VRR_NUC+TM+TM	Escherichia coli	Bacteria; Proteobacteria; Gammaproteobacteria; Enterobacterales; Enterobacteriaceae; Escherichia
NZ_SCMX01000016.1	45485	46669	WP_137924719.1	FFS21_RS10200	GCF_005503625.1	VRR-NUC domain-containing protein	VRR_NUC+TM+TM	Cupriavidus sp. 2SB	Bacteria; Proteobacteria; Betaproteobacteria; Burkholderiales; Burkholderiaceae; Cupriavidus; unclassified Cupriavidus
NZ_SCMX01000027.1	51181	52461	WP_137925563.1	FFS21_RS14920	GCF_005503625.1	hypothetical protein	VRR_NUC+TM	Cupriavidus sp. 2SB	Bacteria; Proteobacteria; Betaproteobacteria; Burkholderiales; Burkholderiaceae; Cupriavidus; unclassified Cupriavidus
NZ_SCMX01000111.1	13663	14847	WP_137928261.1	FFS21_RS29770	GCF_005503625.1	VRR-NUC domain-containing protein	VRR_NUC+TM+TM	Cupriavidus sp. 2SB	Bacteria; Proteobacteria; Betaproteobacteria; Burkholderiales; Burkholderiaceae; Cupriavidus; unclassified Cupriavidus
NZ_UUUF01000010.1	41886	42635	WP_137984838.1	EFD36_RS14480	GCF_900592355.1	VRR-NUC domain-containing protein	VRR_NUC	Burkholderia pseudomallei	Bacteria; Proteobacteria; Betaproteobacteria; Burkholderiales; Burkholderiaceae; Burkholderia; pseudomallei group
NZ_RWKD01000031.1	13485	14363	WP_138763609.1	FHL13_RS29350	GCF_005930595.1	VRR-NUC domain-containing protein		Pseudomonas lactis	Bacteria; Proteobacteria; Gammaproteobacteria; Pseudomonadales; Pseudomonadaceae; Pseudomonas
NZ_VDGE01000014.1	122655	123545	WP_139092428.1	FHI69_RS25300	GCF_006152155.1	VRR-NUC domain-containing protein	SP+VRR_NUC	Janthinobacterium lividum	Bacteria; Proteobacteria; Betaproteobacteria; Burkholderiales; Oxalobacteraceae; Janthinobacterium
NZ_SIRF01000008.1	35485	36222	WP_139421529.1	EYB59_RS06020	GCF_006334885.1	VRR-NUC domain-containing protein	VRR_NUC	Acinetobacter bereziniae	Bacteria; Proteobacteria; Gammaproteobacteria; Moraxellales; Moraxellaceae; Acinetobacter
NZ_SBIJ01000108.1	1	1246	WP_139657267.1	EP164_RS22450	GCF_006239335.1	VRR-NUC domain-containing protein	VRR_NUC+TM+TM	Photorhabdus luminescens subsp. sonorensis	Bacteria; Proteobacteria; Gammaproteobacteria; Enterobacterales; Morganellaceae; Photorhabdus
NZ_SBIJ01000116.1	1	1243	WP_139657281.1	EP164_RS22585	GCF_006239335.1	VRR-NUC domain-containing protein	VRR_NUC+TM+TM	Photorhabdus luminescens subsp. sonorensis	Bacteria; Proteobacteria; Gammaproteobacteria; Enterobacterales; Morganellaceae; Photorhabdus
NZ_QFRR01000007.1	22053	22784	WP_139910206.1	DIJ60_RS01880	GCF_006382045.1	VRR-NUC domain-containing protein	VRR_NUC	Burkholderia pseudomallei	Bacteria; Proteobacteria; Betaproteobacteria; Burkholderiales; Burkholderiaceae; Burkholderia; pseudomallei group
NZ_PPPQ01000066.1	3288	3992	WP_140993698.1	C2U71_RS09610	GCF_006483485.1	VRR-NUC domain-containing protein	VRR_NUC	Burkholderia ubonensis	Bacteria; Proteobacteria; Betaproteobacteria; Burkholderiales; Burkholderiaceae; Burkholderia; Burkholderia cepacia complex
NZ_PPPQ01000090.1	9996	10754	WP_140993980.1	C2U71_RS12475	GCF_006483485.1	VRR-NUC domain-containing protein	VRR_NUC	Burkholderia ubonensis	Bacteria; Proteobacteria; Betaproteobacteria; Burkholderiales; Burkholderiaceae; Burkholderia; Burkholderia cepacia complex
NZ_BGCD01000131.1	1521	2810	WP_141220407.1	FFI78_RS17930	GCF_005393225.1	VRR-NUC domain-containing protein	VRR_NUC+TM+TM	Escherichia coli	Bacteria; Proteobacteria; Gammaproteobacteria; Enterobacterales; Enterobacteriaceae; Escherichia
NZ_BGCD01000157.1	2828	4111	WP_141220468.1	FFI78_RS20030	GCF_005393225.1	VRR-NUC domain-containing protein	VRR_NUC+TM+TM	Escherichia coli	Bacteria; Proteobacteria; Gammaproteobacteria; Enterobacterales; Enterobacteriaceae; Escherichia
NZ_VHQI01000007.1	285391	286680	WP_141176729.1	FKM52_RS13715	GCF_006517625.1	VRR-NUC domain-containing protein	VRR_NUC+TM+TM	Mixta tenebrionis	Bacteria; Proteobacteria; Gammaproteobacteria; Enterobacterales; Erwiniaceae; Mixta
NZ_VFOT01000009.1	1852270	1853025	WP_141831027.1	FB549_RS09215	GCF_006716215.1	hypothetical protein		Delftia sp. HK171	Bacteria; Proteobacteria; Betaproteobacteria; Burkholderiales; Comamonadaceae; Delftia
NZ_VFOT01000013.1	158420	159175	WP_141834286.1	FB549_RS22445	GCF_006716215.1	hypothetical protein		Delftia sp. HK171	Bacteria; Proteobacteria; Betaproteobacteria; Burkholderiales; Comamonadaceae; Delftia
NZ_VFMI01000002.1	725	2062	WP_142017523.1	FHU09_RS25500	GCF_006714955.1	VRR-NUC domain-containing protein	VRR_NUC+TM+TM	Serratia fonticola	Bacteria; Proteobacteria; Gammaproteobacteria; Enterobacterales; Yersiniaceae; Serratia
NZ_CP036282.1	1508403	1509539	WP_142810389.1	EXZ61_RS07070	GCF_006974105.1	VRR-NUC domain-containing protein	VRR_NUC+TM	Rhodoferax sediminis	Bacteria; Proteobacteria; Betaproteobacteria; Burkholderiales; Comamonadaceae; Rhodoferax
NZ_ML660109.1	104175	104624	WP_142929704.1	FKG94_RS25100	GCF_007004655.1	hypothetical protein		Exilibacterium tricleocarpae	Bacteria; Proteobacteria; Gammaproteobacteria; Cellvibrionales; Cellvibrionaceae; Exilibacterium
NZ_SRSB01000011.1	96140	97429	WP_143790162.1	E5140_RS17635	GCF_007050955.1	VRR-NUC domain-containing protein	VRR_NUC+TM+TM	Pantoea agglomerans	Bacteria; Proteobacteria; Gammaproteobacteria; Enterobacterales; Erwiniaceae; Pantoea; Pantoea agglomerans group
NZ_CP061513.1	3698057	3699553	WP_143971898.1	IDH72_RS17795	GCF_016618235.1	VRR-NUC domain-containing protein	VRR_NUC+TM+TM	Morganella morganii	Bacteria; Proteobacteria; Gammaproteobacteria; Enterobacterales; Morganellaceae; Morganella
NZ_VMHM01000008.1	7019	8014	WP_144091878.1	FPQ15_RS06570	GCF_007559145.1	VRR-NUC domain-containing protein	VRR_NUC	Gilliamella apicola	Bacteria; Proteobacteria; Gammaproteobacteria; Orbales; Orbaceae; Gilliamella
NZ_CAAJGK010000037.1	7090	7803	WP_144108118.1	FQ746_RS06495	GCF_900996245.1	VRR-NUC domain-containing protein	VRR_NUC	Paraburkholderia sp. BCC1886	Bacteria; Proteobacteria; Betaproteobacteria; Burkholderiales; Burkholderiaceae; Paraburkholderia
NZ_CABHXG010000027.1	37667	38944	WP_145504161.1	FTA79_RS17500	GCF_902170245.1	VRR-NUC domain-containing protein	VRR_NUC+TM+TM	Yersinia frederiksenii	Bacteria; Proteobacteria; Gammaproteobacteria; Enterobacterales; Yersiniaceae; Yersinia
NZ_CABHYB010000027.1	19734	21029	WP_145603087.1	FTB23_RS07410	GCF_902170585.1	VRR-NUC domain-containing protein	VRR_NUC+TM+TM	Yersinia intermedia	Bacteria; Proteobacteria; Gammaproteobacteria; Enterobacterales; Yersiniaceae; Yersinia
NZ_VIUM01000002.1	55325	56059	WP_145756257.1	FB600_RS03350	GCF_007828315.1	VRR-NUC domain-containing protein	VRR_NUC	Burkholderia sp. SJZ089	Bacteria; Proteobacteria; Betaproteobacteria; Burkholderiales; Burkholderiaceae; Burkholderia
NZ_VIUM01000012.1	177962	178693	WP_145757367.1	FB600_RS22500	GCF_007828315.1	VRR-NUC domain-containing protein	VRR_NUC	Burkholderia sp. SJZ089	Bacteria; Proteobacteria; Betaproteobacteria; Burkholderiales; Burkholderiaceae; Burkholderia
NZ_VIVL01000002.1	14874	15938	WP_145740627.1	FB547_RS06395	GCF_007828835.1	VRR-NUC domain-containing protein	VRR_NUC	Variovorax beijingensis	Bacteria; Proteobacteria; Betaproteobacteria; Burkholderiales; Comamonadaceae; Variovorax
NZ_VIUM01000023.1	2917	3621	WP_145757973.1	FB600_RS31555	GCF_007828315.1	VRR-NUC domain-containing protein	VRR_NUC	Burkholderia sp. SJZ089	Bacteria; Proteobacteria; Betaproteobacteria; Burkholderiales; Burkholderiaceae; Burkholderia
NZ_VFIP01000042.1	40217	41362	WP_146426867.1	FJD37_RS18455	GCF_007858355.1	VRR-NUC domain-containing protein	VRR_NUC	Pseudomonas saxonica	Bacteria; Proteobacteria; Gammaproteobacteria; Pseudomonadales; Pseudomonadaceae; Pseudomonas
NZ_SSOA01000003.1	138006	138977	WP_146931949.1	E6C51_RS07850	GCF_004801395.1	DUF4150 domain-containing protein	Tox-PAAR-like	Allorhizobium terrae	Bacteria; Proteobacteria; Alphaproteobacteria; Hyphomicrobiales; Rhizobiaceae; Rhizobium/Agrobacterium group; Rhizobium
NZ_VOQE01000119.1	12923	14206	WP_146978771.1	FTI75_RS25170	GCF_007995115.1	VRR-NUC domain-containing protein	VRR_NUC+TM+TM	Burkholderia pseudomallei	Bacteria; Proteobacteria; Betaproteobacteria; Burkholderiales; Burkholderiaceae; Burkholderia; pseudomallei group
NZ_VJZG01000003.1	348281	349543	WP_148736427.1	FNN14_RS09415	GCF_008119835.1	VRR-NUC domain-containing protein	VRR_NUC	Cronobacter sakazakii	Bacteria; Proteobacteria; Gammaproteobacteria; Enterobacterales; Enterobacteriaceae; Cronobacter
NZ_VJZG01000006.1	317852	319153	WP_148737096.1	FNN14_RS16210	GCF_008119835.1	VRR-NUC domain-containing protein	VRR_NUC+TM+TM	Cronobacter sakazakii	Bacteria; Proteobacteria; Gammaproteobacteria; Enterobacterales; Enterobacteriaceae; Cronobacter
NZ_QFVF01000322.1	1	245	WP_148746413.1	DJ537_RS25310	GCF_008120925.1	VRR-NUC domain-containing protein	VRR_NUC	Enterobacter hormaechei	Bacteria; Proteobacteria; Gammaproteobacteria; Enterobacterales; Enterobacteriaceae; Enterobacter; Enterobacter cloacae complex
NZ_CP043473.1	2366260	2367498	WP_149296392.1	FYK34_RS10950	GCF_008275125.1	VRR-NUC domain-containing protein	VRR_NUC+TM+TM	Chromobacterium paludis	Bacteria; Proteobacteria; Betaproteobacteria; Neisseriales; Chromobacteriaceae; Chromobacterium
NZ_VNIP01000012.1	59126	60112	WP_149637235.1	FP026_RS24705	GCF_008370325.1	DUF4150 domain-containing protein	Tox-PAAR-like	Rhizobium tropici	Bacteria; Proteobacteria; Alphaproteobacteria; Hyphomicrobiales; Rhizobiaceae; Rhizobium/Agrobacterium group; Rhizobium
NZ_VWPB01000079.1	23794	24495	WP_150085322.1	F2A37_RS13100	GCF_008630545.1	VRR-NUC domain-containing protein	VRR_NUC+TM	Pseudomonas chlororaphis	Bacteria; Proteobacteria; Gammaproteobacteria; Pseudomonadales; Pseudomonadaceae; Pseudomonas
NZ_VXDB01000054.1	3706	4737	WP_150526864.1	F0155_RS22730	GCF_008711325.1	DUF4150 domain-containing protein	Tox-PAAR-like	Roseibium sediminis	Bacteria; Proteobacteria; Alphaproteobacteria; Hyphomicrobiales; Stappiaceae; Roseibium
NZ_CABVHQ010000033.1	17262	18128	WP_150643309.1	F8N21_RS17465	GCF_902497895.1	VRR-NUC domain-containing protein	VRR_NUC	Pseudomonas fluorescens	Bacteria; Proteobacteria; Gammaproteobacteria; Pseudomonadales; Pseudomonadaceae; Pseudomonas
NZ_CABVHY010000001.1	165526	166404	WP_150801784.1	F8N85_RS00745	GCF_902497875.1	VRR-NUC domain-containing protein	VRR_NUC	Pseudomonas fluorescens	Bacteria; Proteobacteria; Gammaproteobacteria; Pseudomonadales; Pseudomonadaceae; Pseudomonas
NZ_VYQH01000335.1	2455	3210	WP_151020476.1	F3K36_RS25875	GCF_008725625.1	hypothetical protein	VRR_NUC	Delftia sp. BR1	Bacteria; Proteobacteria; Betaproteobacteria; Burkholderiales; Comamonadaceae; Delftia
NZ_CABVHY010000007.1	230750	231616	WP_150803347.1	F8N85_RS09420	GCF_902497875.1	VRR-NUC domain-containing protein	VRR_NUC	Pseudomonas fluorescens	Bacteria; Proteobacteria; Gammaproteobacteria; Pseudomonadales; Pseudomonadaceae; Pseudomonas
NZ_CABVHY010000026.1	88629	89357	WP_150805999.1	F8N85_RS24020	GCF_902497875.1	VRR-NUC domain-containing protein	VRR_NUC	Pseudomonas fluorescens	Bacteria; Proteobacteria; Gammaproteobacteria; Pseudomonadales; Pseudomonadaceae; Pseudomonas
NZ_CABVHY010000078.1	748	1626	WP_150807652.1	F8N85_RS33530	GCF_902497875.1	VRR-NUC domain-containing protein	VRR_NUC	Pseudomonas fluorescens	Bacteria; Proteobacteria; Gammaproteobacteria; Pseudomonadales; Pseudomonadaceae; Pseudomonas
NZ_CP018401.1	1586098	1586844	WP_151287559.1	BOC51_RS29440	GCF_002111225.1	VRR-NUC domain-containing protein	VRR_NUC	Burkholderia pseudomallei	Bacteria; Proteobacteria; Betaproteobacteria; Burkholderiales; Burkholderiaceae; Burkholderia; pseudomallei group
NZ_BKEF01000001.1	495170	496183	WP_151712854.1	GBI38_RS02215	GCF_008977645.1	nuclease	TM+TM	Acinetobacter bereziniae	Bacteria; Proteobacteria; Gammaproteobacteria; Moraxellales; Moraxellaceae; Acinetobacter
NZ_BKEF01000004.1	120890	121627	WP_151713280.1	GBI38_RS06790	GCF_008977645.1	VRR-NUC domain-containing protein	VRR_NUC	Acinetobacter bereziniae	Bacteria; Proteobacteria; Gammaproteobacteria; Moraxellales; Moraxellaceae; Acinetobacter
NZ_BKEF01000008.1	95577	96548	WP_151713691.1	GBI38_RS10795	GCF_008977645.1	hypothetical protein	TM	Acinetobacter bereziniae	Bacteria; Proteobacteria; Gammaproteobacteria; Moraxellales; Moraxellaceae; Acinetobacter
NZ_BKEF01000012.1	59791	60804	WP_151713993.1	GBI38_RS13815	GCF_008977645.1	nuclease		Acinetobacter bereziniae	Bacteria; Proteobacteria; Gammaproteobacteria; Moraxellales; Moraxellaceae; Acinetobacter
NZ_BKIP01000025.1	32044	33042	WP_151748395.1	GBL16_RS13345	GCF_008984225.1	hypothetical protein	RE_Bpu10I+VRR_NUC	Acinetobacter lactucae	Bacteria; Proteobacteria; Gammaproteobacteria; Moraxellales; Moraxellaceae; Acinetobacter; Acinetobacter calcoaceticus/baumannii complex
NZ_BKNL01000001.1	119969	120706	WP_151780540.1	GBN82_RS00600	GCF_008993855.1	VRR-NUC domain-containing protein	VRR_NUC	Acinetobacter bereziniae	Bacteria; Proteobacteria; Gammaproteobacteria; Pseudomonadales; Moraxellaceae; Acinetobacter
NZ_BKNL01000003.1	106866	107600	WP_151780653.1	GBN82_RS02045	GCF_008993855.1	VRR-NUC domain-containing protein	VRR_NUC	Acinetobacter bereziniae	Bacteria; Proteobacteria; Gammaproteobacteria; Pseudomonadales; Moraxellaceae; Acinetobacter
NZ_BKNL01000004.1	92752	93723	WP_151780675.1	GBN82_RS02500	GCF_008993855.1	hypothetical protein	TM	Acinetobacter bereziniae	Bacteria; Proteobacteria; Gammaproteobacteria; Pseudomonadales; Moraxellaceae; Acinetobacter
NZ_JPGM01000005.1	96396	97781	WP_152603185.1	GQ57_RS41310	GCF_000731655.1	VRR-NUC domain-containing protein	VRR_NUC	Burkholderia sp. MSh2	Bacteria; Proteobacteria; Betaproteobacteria; Burkholderiales; Burkholderiaceae; Burkholderia
NZ_RQVU01000027.1	198694	200004	WP_152327622.1	EH227_RS22555	GCF_009295505.1	VRR-NUC domain-containing protein	VRR_NUC	Rouxiella chamberiensis	Bacteria; Proteobacteria; Gammaproteobacteria; Enterobacterales; Yersiniaceae; Rouxiella
NZ_VUAZ01000063.1	8244	9548	WP_152746645.1	F0169_RS11935	GCF_009296165.1	VRR-NUC domain-containing protein	DUF3146+VRR_NUC+TM+TM	Pseudomonas kitaguniensis	Bacteria; Proteobacteria; Gammaproteobacteria; Pseudomonadales; Pseudomonadaceae; Pseudomonas
NZ_VUBA01000167.1	7932	9221	WP_152751206.1	F0170_RS23245	GCF_009296225.1	VRR-NUC domain-containing protein	VRR_NUC+TM+TM	Pseudomonas kitaguniensis	Bacteria; Proteobacteria; Gammaproteobacteria; Pseudomonadales; Pseudomonadaceae; Pseudomonas
NZ_SSXU01000005.1	135166	136248	WP_153160954.1	GH681_RS08045	GCF_009469605.1	DUF4150 domain-containing protein	Tox-PAAR-like	Zoogloea sp. 1C4	Bacteria; Proteobacteria; Betaproteobacteria; Rhodocyclales; Zoogloeaceae; Zoogloea; unclassified Zoogloea
NZ_WIWN01000044.1	27644	28522	WP_153390964.1	GHO44_RS16525	GCF_009600115.1	VRR-NUC domain-containing protein	VRR_NUC	Pseudomonas helleri	Bacteria; Proteobacteria; Gammaproteobacteria; Pseudomonadales; Pseudomonadaceae; Pseudomonas
NZ_WIWJ01000004.1	90050	90928	WP_153429339.1	GHO40_RS03315	GCF_009600135.1	VRR-NUC domain-containing protein	VRR_NUC	Pseudomonas helleri	Bacteria; Proteobacteria; Gammaproteobacteria; Pseudomonadales; Pseudomonadaceae; Pseudomonas
NZ_WIWG01000008.1	72549	73427	WP_153331406.1	GHO38_RS04645	GCF_009600205.1	VRR-NUC domain-containing protein	VRR_NUC	Pseudomonas helleri	Bacteria; Proteobacteria; Gammaproteobacteria; Pseudomonadales; Pseudomonadaceae; Pseudomonas
NZ_WIWI01000004.1	27784	28662	WP_153326429.1	GHO39_RS01960	GCF_009600225.1	VRR-NUC domain-containing protein	VRR_NUC	Pseudomonas helleri	Bacteria; Proteobacteria; Gammaproteobacteria; Pseudomonadales; Pseudomonadaceae; Pseudomonas
NZ_QTSW01000030.1	53764	54642	WP_153475690.1	DXU77_RS20895	GCF_009498775.1	VRR-NUC domain-containing protein	VRR_NUC	Pseudomonas lactis	Bacteria; Proteobacteria; Gammaproteobacteria; Pseudomonadales; Pseudomonadaceae; Pseudomonas
NZ_CP045087.1	603085	603825	WP_153477261.1	GAS19_RS02795	GCF_009578005.1	VRR-NUC domain-containing protein	VRR_NUC	Burkholderia glumae	Bacteria; Proteobacteria; Betaproteobacteria; Burkholderiales; Burkholderiaceae; Burkholderia
NZ_CP045087.1	1241515	1242255	WP_153477354.1	GAS19_RS05780	GCF_009578005.1	VRR-NUC domain-containing protein	VRR_NUC	Burkholderia glumae	Bacteria; Proteobacteria; Betaproteobacteria; Burkholderiales; Burkholderiaceae; Burkholderia
NZ_CP045087.1	2891612	2892316	WP_153477948.1	GAS19_RS13420	GCF_009578005.1	VRR-NUC domain-containing protein	VRR_NUC	Burkholderia glumae	Bacteria; Proteobacteria; Betaproteobacteria; Burkholderiales; Burkholderiaceae; Burkholderia
NZ_WLZX01000007.1	70546	71637	WP_154753767.1	GK011_RS16360	GCF_009707715.1	DUF4150 domain-containing protein	Tox-PAAR-like+TM	Erwinia sp. J316	Bacteria; Proteobacteria; Gammaproteobacteria; Enterobacterales; Erwiniaceae; Erwinia; unclassified Erwinia
NZ_CP046509.1	1125483	1126574	WP_154753890.1	GN242_RS05075	GCF_009738185.1	DUF4150 domain-containing protein	Tox-PAAR-like+TM	Erwinia sp. J780	Bacteria; Proteobacteria; Gammaproteobacteria; Enterobacterales; Erwiniaceae; Erwinia; unclassified Erwinia
NZ_JAAQXJ010000012.1	97775	98476	WP_154907979.1	HBN96_RS19870	GCF_012985975.1	VRR-NUC domain-containing protein	VRR_NUC+TM	Pseudomonas proteolytica	Bacteria; Proteobacteria; Gammaproteobacteria; Pseudomonadales; Pseudomonadaceae; Pseudomonas
NZ_LOSW01000060.1	277033	278379	WP_155627544.1	WI27_RS26675	GCF_001521975.1	hypothetical protein	VRR_NUC	Burkholderia cepacia	Bacteria; Proteobacteria; Betaproteobacteria; Burkholderiales; Burkholderiaceae; Burkholderia; Burkholderia cepacia complex
NZ_WMJZ01000030.1	7661	9517	WP_155109626.1	GJV78_RS18055	GCF_009711095.1	DUF3396 domain-containing protein	DUF2345+DUF3396	Escherichia alba	Bacteria; Proteobacteria; Gammaproteobacteria; Enterobacterales; Enterobacteriaceae; Escherichia
NZ_WNKZ01000021.1	56351	57073	WP_155470370.1	GM672_RS09940	GCF_009720835.1	VRR-NUC domain-containing protein	VRR_NUC	Massilia buxea	Bacteria; Proteobacteria; Betaproteobacteria; Burkholderiales; Oxalobacteraceae; Massilia group; Massilia
NZ_CP046622.1	624763	625683	WP_157611796.1	GOQ09_RS02850	GCF_009755665.1	DUF4150 domain-containing protein	Tox-PAAR-like+VRR_NUC	Variovorax paradoxus	Bacteria; Proteobacteria; Betaproteobacteria; Burkholderiales; Comamonadaceae; Variovorax
NZ_WHLX01000002.1	225287	226465	WP_160473448.1	GA566_RS16940	GCF_009793345.1	VRR-NUC domain-containing protein	VRR_NUC+TM+TM	Cupriavidus sp. SW-Y-13	Bacteria; Proteobacteria; Betaproteobacteria; Burkholderiales; Burkholderiaceae; Cupriavidus; unclassified Cupriavidus
NZ_WTSI01000103.1	1	423	WP_160463099.1	GP933_RS25375	GCF_009799125.1	VRR-NUC domain-containing protein	VRR_NUC	Escherichia coli	Bacteria; Proteobacteria; Gammaproteobacteria; Enterobacterales; Enterobacteriaceae; Escherichia
NZ_CP041971.1	2279761	2280489	WP_159414343.1	FPL18_RS10695	GCF_009884295.1	VRR-NUC domain-containing protein	VRR_NUC+TM	Acinetobacter gyllenbergii	Bacteria; Proteobacteria; Gammaproteobacteria; Moraxellales; Moraxellaceae; Acinetobacter
NZ_WITE01000002.1	1600612	1601316	WP_160293065.1	LvStA_RS07935	GCF_009912275.1	VRR-NUC domain-containing protein	VRR_NUC	Burkholderia gladioli	Bacteria; Proteobacteria; Betaproteobacteria; Burkholderiales; Burkholderiaceae; Burkholderia
NZ_WITE01000002.1	1780984	1781721	WP_160293110.1	LvStA_RS08775	GCF_009912275.1	VRR-NUC domain-containing protein	VRR_NUC	Burkholderia gladioli	Bacteria; Proteobacteria; Betaproteobacteria; Burkholderiales; Burkholderiaceae; Burkholderia
NZ_VNZD01000336.1	1	262	WP_160537084.1	FQ041_RS25550	GCF_009821025.1	VRR-NUC domain-containing protein	VRR_NUC	Escherichia coli	Bacteria; Proteobacteria; Gammaproteobacteria; Enterobacterales; Enterobacteriaceae; Escherichia
NZ_WUJF01000017.1	71973	73307	WP_160769696.1	GRW89_RS26510	GCF_009825315.1	VRR-NUC domain-containing protein	VRR_NUC	Pseudomonas moraviensis	Bacteria; Proteobacteria; Gammaproteobacteria; Pseudomonadales; Pseudomonadaceae; Pseudomonas
NZ_SAIP01000003.1	110715	111419	WP_160639287.1	EON00_RS08170	GCF_009910715.1	VRR-NUC domain-containing protein	VRR_NUC	Burkholderia sp. ISTR5	Bacteria; Proteobacteria; Betaproteobacteria; Burkholderiales; Burkholderiaceae; Burkholderia
NZ_SAIP01000003.1	289523	290260	WP_160639334.1	EON00_RS09000	GCF_009910715.1	VRR-NUC domain-containing protein		Burkholderia sp. ISTR5	Bacteria; Proteobacteria; Betaproteobacteria; Burkholderiales; Burkholderiaceae; Burkholderia
NZ_SAIP01000007.1	196244	196996	WP_160640040.1	EON00_RS19820	GCF_009910715.1	VRR-NUC domain-containing protein	VRR_NUC	Burkholderia sp. ISTR5	Bacteria; Proteobacteria; Betaproteobacteria; Burkholderiales; Burkholderiaceae; Burkholderia
NZ_SAIP01000007.1	448384	449079	WP_160640118.1	EON00_RS20965	GCF_009910715.1	VRR-NUC domain-containing protein	VRR_NUC	Burkholderia sp. ISTR5	Bacteria; Proteobacteria; Betaproteobacteria; Burkholderiales; Burkholderiaceae; Burkholderia
NZ_CP028271.1	1649026	1650129	WP_160621256.1	C7M51_RS07715	GCF_009914055.1	DUF4150 domain-containing protein	Tox-PAAR-like	Mixta intestinalis	Bacteria; Proteobacteria; Gammaproteobacteria; Enterobacterales; Erwiniaceae; Mixta
NZ_WUMS01000070.1	2046	2747	WP_160934744.1	GR157_RS36165	GCF_009826925.1	hypothetical protein	VRR_NUC+TM	Burkholderia sp. 4701	Bacteria; Proteobacteria; Betaproteobacteria; Burkholderiales; Burkholderiaceae; Burkholderia
NZ_JAAEAJ010000039.1	5689	6729	WP_162107066.1	GXP64_RS18585	GCF_010119435.1	DUF4150 domain-containing protein	Tox-PAAR-like+VRR_NUC	Rhodovulum sulfidophilum	Bacteria; Proteobacteria; Alphaproteobacteria; Rhodobacterales; Rhodobacteraceae; Rhodovulum
NZ_JAAKGD010000004.1	230766	231497	WP_164677002.1	G5B61_RS15875	GCF_011043675.1	VRR-NUC domain-containing protein	VRR_NUC	Burkholderia multivorans	Bacteria; Proteobacteria; Betaproteobacteria; Burkholderiales; Burkholderiaceae; Burkholderia; Burkholderia cepacia complex
NZ_JAACXU010000004.1	178708	179970	WP_165580382.1	GWK53_RS04955	GCF_011140355.1	VRR-NUC domain-containing protein	VRR_NUC+TM+TM	Burkholderia cepacia	Bacteria; Proteobacteria; Betaproteobacteria; Burkholderiales; Burkholderiaceae; Burkholderia; Burkholderia cepacia complex
NZ_QODE01000011.1	291660	292364	WP_165651517.1	DRA46_RS19685	GCF_011319435.1	VRR-NUC domain-containing protein	VRR_NUC	Burkholderia gladioli	Bacteria; Proteobacteria; Betaproteobacteria; Burkholderiales; Burkholderiaceae; Burkholderia
NZ_JAANPK010000016.1	1462	2694	WP_165672552.1	HBA82_RS11730	GCF_011319855.1	VRR-NUC domain-containing protein	VRR_NUC+TM+TM	Pseudomonas otitidis	Bacteria; Proteobacteria; Gammaproteobacteria; Pseudomonadales; Pseudomonadaceae; Pseudomonas
NZ_JAANPK010000032.1	11342	11662	WP_165673090.1	HBA82_RS18665	GCF_011319855.1	VRR-NUC domain-containing protein	VRR_NUC	Pseudomonas otitidis	Bacteria; Proteobacteria; Gammaproteobacteria; Pseudomonadales; Pseudomonadaceae; Pseudomonas
NZ_JAANPK010000032.1	11847	12276	WP_165673070.1	HBA82_RS18670	GCF_011319855.1	VRR-NUC domain-containing protein		Pseudomonas otitidis	Bacteria; Proteobacteria; Gammaproteobacteria; Pseudomonadales; Pseudomonadaceae; Pseudomonas
NZ_JAANPK010000032.1	23726	24433	WP_165673075.1	HBA82_RS18725	GCF_011319855.1	VRR-NUC domain-containing protein	VRR_NUC	Pseudomonas otitidis	Bacteria; Proteobacteria; Gammaproteobacteria; Pseudomonadales; Pseudomonadaceae; Pseudomonas
NZ_JAANPJ010000043.1	29201	29908	WP_165671301.1	HBA86_RS23345	GCF_011319865.1	VRR-NUC domain-containing protein	VRR_NUC	Pseudomonas otitidis	Bacteria; Proteobacteria; Gammaproteobacteria; Pseudomonadales; Pseudomonadaceae; Pseudomonas
NZ_JAANIE010000007.1	5176	5904	WP_166011703.1	G9F32_RS09940	GCF_011174715.1	VRR-NUC domain-containing protein	VRR_NUC+TM	Acinetobacter shaoyimingii	Bacteria; Proteobacteria; Gammaproteobacteria; Moraxellales; Moraxellaceae; Acinetobacter
NZ_JAANIE010000007.1	130254	131228	WP_166011814.1	G9F32_RS10440	GCF_011174715.1	hypothetical protein	TM	Acinetobacter shaoyimingii	Bacteria; Proteobacteria; Gammaproteobacteria; Moraxellales; Moraxellaceae; Acinetobacter
NZ_PUJU01000042.1	39752	41104	WP_166296207.1	C5471_RS17250	GCF_011189505.1	VRR-NUC domain-containing protein	VRR_NUC+TM+TM	Photorhabdus tasmaniensis	Bacteria; Proteobacteria; Gammaproteobacteria; Enterobacterales; Morganellaceae; Photorhabdus
NZ_PUJU01000118.1	1	1081	WP_166296517.1	C5471_RS22915	GCF_011189505.1	VRR-NUC domain-containing protein	VRR_NUC+TM+TM	Photorhabdus tasmaniensis	Bacteria; Proteobacteria; Gammaproteobacteria; Enterobacterales; Morganellaceae; Photorhabdus
NZ_JAAOHY010000009.1	25698	26759	WP_166330526.1	G7044_RS15560	GCF_011308835.1	DUF4150 domain-containing protein	Tox-PAAR-like	Paracoccus xiamenensis	Bacteria; Proteobacteria; Alphaproteobacteria; Rhodobacterales; Rhodobacteraceae; Paracoccus
NZ_VXCA01000050.1	373	1755	WP_166226242.1	F2P67_RS27095	GCF_011369485.1	VRR-NUC domain-containing protein	VRR_NUC+TM+TM+TM	Pseudomonas sp. PS14(2019)	Bacteria; Proteobacteria; Gammaproteobacteria; Pseudomonadales; Pseudomonadaceae; Pseudomonas
NZ_RQYA01000001.1	162132	162860	WP_165750682.1	EIB72_RS00745	GCF_011392275.1	VRR-NUC domain-containing protein	VRR_NUC	Burkholderia ambifaria	Bacteria; Proteobacteria; Betaproteobacteria; Burkholderiales; Burkholderiaceae; Burkholderia; Burkholderia cepacia complex
NZ_RQYA01000010.1	193429	194070	WP_165754173.1	EIB72_RS28930	GCF_011392275.1	hypothetical protein		Burkholderia ambifaria	Bacteria; Proteobacteria; Betaproteobacteria; Burkholderiales; Burkholderiaceae; Burkholderia; Burkholderia cepacia complex
NZ_JAAALF010000023.1	40068	40937	WP_166591037.1	GVN25_RS14420	GCF_009905775.1	VRR-NUC domain-containing protein	VRR_NUC	Pseudomonas sp. BC115LW	Bacteria; Proteobacteria; Gammaproteobacteria; Pseudomonadales; Pseudomonadaceae; Pseudomonas
NZ_JAAOLX010000007.1	148285	149571	WP_166827518.1	HA050_RS14410	GCF_011601265.1	hypothetical protein	VRR_NUC	Iodobacter sp. HSC-16F04	Bacteria; Proteobacteria; Betaproteobacteria; Neisseriales; Chromobacteriaceae; Iodobacter
NZ_VWWN01000074.1	17662	18414	WP_166912261.1	F3J21_RS13085	GCF_011752985.1	VRR-NUC domain-containing protein	VRR_NUC	Burkholderia sp. Tr-860	Bacteria; Proteobacteria; Betaproteobacteria; Burkholderiales; Burkholderiaceae; Burkholderia
NZ_JAAOZA010000002.1	1486511	1487233	WP_166783347.1	FHR28_RS19665	GCF_011759595.1	VRR-NUC domain-containing protein	VRR_NUC+TM	Acinetobacter sp. BIGb0196	Bacteria; Proteobacteria; Gammaproteobacteria; Moraxellales; Moraxellaceae; Acinetobacter
NZ_JAAOXM010000005.1	45625	46389	WP_166958921.1	HAV18_RS19975	GCF_011605345.1	VRR-NUC domain-containing protein	VRR_NUC	Burkholderia sp. D-99	Bacteria; Proteobacteria; Betaproteobacteria; Burkholderiales; Burkholderiaceae; Burkholderia
NZ_VWWN01000055.1	10791	11498	WP_166914011.1	F3J21_RS10910	GCF_011752985.1	VRR-NUC domain-containing protein	VRR_NUC	Burkholderia sp. Tr-860	Bacteria; Proteobacteria; Betaproteobacteria; Burkholderiales; Burkholderiaceae; Burkholderia
NZ_VWWN01000061.1	19595	20329	WP_166913268.1	F3J21_RS11675	GCF_011752985.1	VRR-NUC domain-containing protein	VRR_NUC	Burkholderia sp. Tr-860	Bacteria; Proteobacteria; Betaproteobacteria; Burkholderiales; Burkholderiaceae; Burkholderia
NZ_VWWN01000095.1	16507	17241	WP_166913820.1	F3J21_RS15240	GCF_011752985.1	VRR-NUC domain-containing protein	VRR_NUC	Burkholderia sp. Tr-860	Bacteria; Proteobacteria; Betaproteobacteria; Burkholderiales; Burkholderiaceae; Burkholderia
NZ_VWWN01000101.1	2947	3651	WP_166916447.1	F3J21_RS15705	GCF_011752985.1	VRR-NUC domain-containing protein	VRR_NUC	Burkholderia sp. Tr-860	Bacteria; Proteobacteria; Betaproteobacteria; Burkholderiales; Burkholderiaceae; Burkholderia
NZ_VWWN01000195.1	6537	7853	WP_166914839.1	F3J21_RS22440	GCF_011752985.1	VRR-NUC domain-containing protein	VRR_NUC+TM+TM+TM	Burkholderia sp. Tr-860	Bacteria; Proteobacteria; Betaproteobacteria; Burkholderiales; Burkholderiaceae; Burkholderia
NZ_VWWL01000007.1	96348	97082	WP_167040706.1	F3J19_RS10935	GCF_011752995.1	VRR-NUC domain-containing protein	DUF4776+VRR_NUC	Burkholderia sp. Ax-1724	Bacteria; Proteobacteria; Betaproteobacteria; Burkholderiales; Burkholderiaceae; Burkholderia
NZ_VWWL01000009.1	134141	135418	WP_167041611.1	F3J19_RS12585	GCF_011752995.1	VRR-NUC domain-containing protein	VRR_NUC+TM+TM	Burkholderia sp. Ax-1724	Bacteria; Proteobacteria; Betaproteobacteria; Burkholderiales; Burkholderiaceae; Burkholderia
NZ_VVIW01000001.1	449646	450743	WP_167074180.1	F1609_RS02115	GCF_011682045.1	DUF4150 domain-containing protein	Tox-PAAR-like	Massilia aquatica	Bacteria; Proteobacteria; Betaproteobacteria; Burkholderiales; Oxalobacteraceae; Massilia group; Massilia
NZ_VUYU01000034.1	11366	12463	WP_167231585.1	F0185_RS30140	GCF_011682065.1	DUF4150 domain-containing protein	Tox-PAAR-like	Massilia rubra	Bacteria; Proteobacteria; Betaproteobacteria; Burkholderiales; Oxalobacteraceae; Massilia group; Massilia
NZ_VWWL01000010.1	55086	55841	WP_167042088.1	F3J19_RS13555	GCF_011752995.1	VRR-NUC domain-containing protein	VRR_NUC	Burkholderia sp. Ax-1724	Bacteria; Proteobacteria; Betaproteobacteria; Burkholderiales; Burkholderiaceae; Burkholderia
NZ_VWWL01000016.1	22105	23382	WP_167044539.1	F3J19_RS19410	GCF_011752995.1	VRR-NUC domain-containing protein	VRR_NUC+TM+TM	Burkholderia sp. Ax-1724	Bacteria; Proteobacteria; Betaproteobacteria; Burkholderiales; Burkholderiaceae; Burkholderia
NZ_VWWL01000020.1	1630	2358	WP_167046384.1	F3J19_RS22720	GCF_011752995.1	VRR-NUC domain-containing protein	VRR_NUC	Burkholderia sp. Ax-1724	Bacteria; Proteobacteria; Betaproteobacteria; Burkholderiales; Burkholderiaceae; Burkholderia
NZ_VWWL01000049.1	1	580	WP_167050483.1	F3J19_RS32080	GCF_011752995.1	VRR-NUC domain-containing protein	VRR_NUC	Burkholderia sp. Ax-1724	Bacteria; Proteobacteria; Betaproteobacteria; Burkholderiales; Burkholderiaceae; Burkholderia
NZ_VWWI01000156.1	7233	7967	WP_167233494.1	F3J16_RS20140	GCF_011753075.1	VRR-NUC domain-containing protein	VRR_NUC	Burkholderia sp. Ap-962	Bacteria; Proteobacteria; Betaproteobacteria; Burkholderiales; Burkholderiaceae; Burkholderia
NZ_VWWI01000306.1	2949	3653	WP_167234168.1	F3J16_RS28170	GCF_011753075.1	VRR-NUC domain-containing protein	VRR_NUC	Burkholderia sp. Ap-962	Bacteria; Proteobacteria; Betaproteobacteria; Burkholderiales; Burkholderiaceae; Burkholderia
NZ_VWWI01000427.1	318	1067	WP_167234498.1	F3J16_RS32075	GCF_011753075.1	VRR-NUC domain-containing protein	VRR_NUC	Burkholderia sp. Ap-962	Bacteria; Proteobacteria; Betaproteobacteria; Burkholderiales; Burkholderiaceae; Burkholderia
NZ_VWWC01000026.1	54681	55418	WP_167242020.1	F3J10_RS10550	GCF_011753175.1	VRR-NUC domain-containing protein	VRR_NUC	Burkholderia sp. Cy-637	Bacteria; Proteobacteria; Betaproteobacteria; Burkholderiales; Burkholderiaceae; Burkholderia
NZ_VWWC01000054.1	30146	30877	WP_167242494.1	F3J10_RS16465	GCF_011753175.1	VRR-NUC domain-containing protein	VRR_NUC	Burkholderia sp. Cy-637	Bacteria; Proteobacteria; Betaproteobacteria; Burkholderiales; Burkholderiaceae; Burkholderia
NZ_VWWC01000087.1	15271	15975	WP_167242946.1	F3J10_RS21555	GCF_011753175.1	VRR-NUC domain-containing protein	VRR_NUC	Burkholderia sp. Cy-637	Bacteria; Proteobacteria; Betaproteobacteria; Burkholderiales; Burkholderiaceae; Burkholderia
NZ_VWWC01000114.1	19233	19937	WP_167243208.1	F3J10_RS24695	GCF_011753175.1	VRR-NUC domain-containing protein	VRR_NUC	Burkholderia sp. Cy-637	Bacteria; Proteobacteria; Betaproteobacteria; Burkholderiales; Burkholderiaceae; Burkholderia
NZ_VWWM01000002.1	125198	125926	WP_167281615.1	F3J20_RS01980	GCF_011752945.1	VRR-NUC domain-containing protein	VRR_NUC	Paraburkholderia sp. Cy-641	Bacteria; Proteobacteria; Betaproteobacteria; Burkholderiales; Burkholderiaceae; Paraburkholderia
NZ_VWWM01000003.1	168070	169347	WP_167281820.1	F3J20_RS03010	GCF_011752945.1	VRR-NUC domain-containing protein	VRR_NUC+TM+TM	Paraburkholderia sp. Cy-641	Bacteria; Proteobacteria; Betaproteobacteria; Burkholderiales; Burkholderiaceae; Paraburkholderia
NZ_VWWM01000004.1	165474	166487	WP_167282015.1	F3J20_RS03780	GCF_011752945.1	VRR-NUC domain-containing protein	VRR_NUC+TM+TM	Paraburkholderia sp. Cy-641	Bacteria; Proteobacteria; Betaproteobacteria; Burkholderiales; Burkholderiaceae; Paraburkholderia
NZ_VWWM01000043.1	37588	38352	WP_167284500.1	F3J20_RS22090	GCF_011752945.1	VRR-NUC domain-containing protein	VRR_NUC	Paraburkholderia sp. Cy-641	Bacteria; Proteobacteria; Betaproteobacteria; Burkholderiales; Burkholderiaceae; Paraburkholderia
NZ_VWWM01000057.1	42882	44147	WP_167284925.1	F3J20_RS25410	GCF_011752945.1	VRR-NUC domain-containing protein	VRR_NUC+TM+TM+TM	Paraburkholderia sp. Cy-641	Bacteria; Proteobacteria; Betaproteobacteria; Burkholderiales; Burkholderiaceae; Paraburkholderia
NZ_VWVZ01000002.1	342357	343355	WP_167248093.1	F3J02_RS05705	GCF_011753255.1	hypothetical protein	RE_Bpu10I+VRR_NUC	Acinetobacter sp. Tr-809	Bacteria; Proteobacteria; Gammaproteobacteria; Moraxellales; Moraxellaceae; Acinetobacter
NZ_JAATHC010000033.1	5	1234	WP_167339675.1	HCG45_RS12370	GCF_011777485.1	VRR-NUC domain-containing protein	VRR_NUC+TM+TM	Pseudomonas fulva	Bacteria; Proteobacteria; Gammaproteobacteria; Pseudomonadales; Pseudomonadaceae; Pseudomonas
NZ_UBJG01000013.1	5655	6791	WP_111782137.1	DTQ77_RS17295	GCF_900465585.1	hypothetical protein	Tox-PAAR-like	Rhizobiales bacterium	Bacteria; Proteobacteria; Alphaproteobacteria; Rhizobiales
NZ_UBKA01000010.1	8285	9421	WP_111809891.1	DS867_RS12200	GCF_900465695.1	hypothetical protein	Tox-PAAR-like	Rhizobiales bacterium	Bacteria; Proteobacteria; Alphaproteobacteria; Rhizobiales
NZ_UBME01000002.1	233110	233787	WP_113098296.1	DUE70_RS03055	GCF_900466465.1	hypothetical protein		Rhizobiales bacterium	Bacteria; Proteobacteria; Alphaproteobacteria; Rhizobiales
NZ_UBMO01000019.1	540128	541321	WP_113420866.1	DUM23_RS19675	GCF_900466555.1	DUF4150 domain-containing protein	Tox-PAAR-like+TM+TM	Rhizobiales bacterium	Bacteria; Proteobacteria; Alphaproteobacteria; Rhizobiales
NZ_UBND01000029.1	16054	17190	WP_112637531.1	DT003_RS25165	GCF_900466695.1	hypothetical protein	Tox-PAAR-like	Rhizobiales bacterium	Bacteria; Proteobacteria; Alphaproteobacteria; Rhizobiales
NZ_UBNM01000003.1	13508	14644	WP_113218290.1	DUI85_RS03300	GCF_900466865.1	DUF4150 domain-containing protein	Tox-PAAR-like	Rhizobiales bacterium	Bacteria; Proteobacteria; Alphaproteobacteria; Rhizobiales
NZ_UBSK01000028.1	5462	6478	WP_111842671.1	DTW98_RS26830	GCF_900468205.1	hypothetical protein	Tox-PAAR-like	Rhizobiales bacterium	Bacteria; Proteobacteria; Alphaproteobacteria; Rhizobiales
NZ_UBTR01000045.1	15829	16965	WP_112179536.1	DS883_RS26970	GCF_900468295.1	hypothetical protein	Tox-PAAR-like	Rhizobiales bacterium	Bacteria; Proteobacteria; Alphaproteobacteria; Rhizobiales
NZ_UCGK01000010.1	13506	14642	WP_113224934.1	DUI99_RS16215	GCF_900471905.1	DUF4150 domain-containing protein	Tox-PAAR-like	Rhizobiales bacterium	Bacteria; Proteobacteria; Alphaproteobacteria; Rhizobiales
NZ_UCGJ01000022.1	18516	19193	WP_112964637.1	DUC93_RS22245	GCF_900472005.1	hypothetical protein		Rhizobiales bacterium	Bacteria; Proteobacteria; Alphaproteobacteria; Rhizobiales
NZ_UCIN01000018.1	64449	65585	WP_112355544.1	DTX98_RS24740	GCF_900472565.1	hypothetical protein	Tox-PAAR-like	Rhizobiales bacterium	Bacteria; Proteobacteria; Alphaproteobacteria; Rhizobiales
NZ_FOEB01000003.1	293070	294182	WP_091746616.1	BMX97_RS05925	GCF_900110515.1	DUF4150 domain-containing protein	Tox-PAAR-like	Methylobacterium sp. ap11	Bacteria; Proteobacteria; Alphaproteobacteria; Rhizobiales; Methylobacteriaceae; Methylobacterium
NZ_FONO01000001.1	292189	293292	WP_091881663.1	BM208_RS01255	GCF_900112945.1	DUF4150 domain-containing protein	Tox-PAAR-like	Methylobacterium sp. yr596	Bacteria; Proteobacteria; Alphaproteobacteria; Rhizobiales; Methylobacteriaceae; Methylobacterium
NZ_QRFF01000006.1	69818	70954	WP_149900673.1	DXM27_RS19430	GCF_008501935.1	DUF4150 domain-containing protein	Tox-PAAR-like	Agrobacterium rhizogenes	Bacteria; Proteobacteria; Alphaproteobacteria; Rhizobiales; Rhizobiaceae; Rhizobium/Agrobacterium group; Agrobacterium
NZ_MAVS02000017.1	3559	4692	WP_081341700.1	BBI12_RS20995	GCF_001758305.2	DUF4150 domain-containing protein	Tox-PAAR-like	Agrobacterium vitis	Bacteria; Proteobacteria; Alphaproteobacteria; Rhizobiales; Rhizobiaceae; Rhizobium/Agrobacterium group; Agrobacterium
NZ_MBFC01000059.1	11873	12955	WP_080516994.1	BBL01_RS15435	GCF_001860135.1	DUF4150 domain-containing protein	Tox-PAAR-like	Agrobacterium vitis	Bacteria; Proteobacteria; Alphaproteobacteria; Rhizobiales; Rhizobiaceae; Rhizobium/Agrobacterium group; Agrobacterium
NZ_VIVD01000002.1	293452	294426	WP_146931951.1	FB480_RS06480	GCF_007993855.1	DUF4150 domain-containing protein	Tox-PAAR-like	Agrobacterium vitis	Bacteria; Proteobacteria; Alphaproteobacteria; Rhizobiales; Rhizobiaceae; Rhizobium/Agrobacterium group; Agrobacterium
NZ_WPHS01000008.1	86156	86788	WP_156542382.1	GOZ89_RS15445	GCF_009744125.1	hypothetical protein		Agrobacterium vitis	Bacteria; Proteobacteria; Alphaproteobacteria; Rhizobiales; Rhizobiaceae; Rhizobium/Agrobacterium group; Agrobacterium
NZ_WPHS01000008.1	88417	89559	WP_156542386.1	GOZ89_RS15455	GCF_009744125.1	DUF4150 domain-containing protein	Tox-PAAR-like+VRR_NUC+TM+TM	Agrobacterium vitis	Bacteria; Proteobacteria; Alphaproteobacteria; Rhizobiales; Rhizobiaceae; Rhizobium/Agrobacterium group; Agrobacterium
NZ_WPHZ01000012.1	197327	198409	WP_156599205.1	GOZ83_RS17335	GCF_009744295.1	DUF4150 domain-containing protein	Tox-PAAR-like	Agrobacterium vitis	Bacteria; Proteobacteria; Alphaproteobacteria; Rhizobiales; Rhizobiaceae; Rhizobium/Agrobacterium group; Agrobacterium
NZ_VIWJ01000025.1	28819	29808	WP_145677182.1	FHW46_RS31400	GCF_007829235.1	DUF4150 domain-containing protein	Tox-PAAR-like	Rhizobium lusitanum	Bacteria; Proteobacteria; Alphaproteobacteria; Rhizobiales; Rhizobiaceae; Rhizobium/Agrobacterium group; Rhizobium
NZ_QJTK01000001.1	125066	126169	WP_110803794.1	C8J30_RS00580	GCF_003217355.1	hypothetical protein	Tox-PAAR-like	Rhodobacter viridis	Bacteria; Proteobacteria; Alphaproteobacteria; Rhodobacterales; Rhodobacteraceae; Rhodobacter
NZ_PGTY01000005.1	148908	149960	WP_100369842.1	BC777_RS19135	GCF_002797915.1	DUF4150 domain-containing protein	Tox-PAAR-like+TM	Yoonia maricola	Bacteria; Proteobacteria; Alphaproteobacteria; Rhodobacterales; Rhodobacteraceae; Yoonia
NZ_QAYS01000067.1	26570	27901	WP_081259875.1	DBL07_RS19320	GCF_003053425.1	hypothetical protein	VRR_NUC	Achromobacter mucicolens	Bacteria; Proteobacteria; Betaproteobacteria; Burkholderiales; Alcaligenaceae; Achromobacter
NZ_PREU01000009.1	23799	24626	WP_104144631.1	C4E15_RS19535	GCF_002926155.1	VRR-NUC domain protein	VRR_NUC	Achromobacter spanius	Bacteria; Proteobacteria; Betaproteobacteria; Burkholderiales; Alcaligenaceae; Achromobacter
NZ_QPES01000002.1	357555	358778	WP_153102022.1	GH657_RS15975	GCF_009455685.1	VRR-NUC domain-containing protein	VRR_NUC+TM+TM	Burkholderia hayleyella	Bacteria; Proteobacteria; Betaproteobacteria; Burkholderiales; Burkholderiaceae; Burkholderia
NZ_NMVE01000020.1	87887	88339	WP_009932249.1	CF647_RS24495	GCF_002900705.1	VRR-NUC domain-containing protein	VRR_NUC	Burkholderia sp. 117	Bacteria; Proteobacteria; Betaproteobacteria; Burkholderiales; Burkholderiaceae; Burkholderia
NC_014539.1	3941008	3941715	WP_013340904.1	BC1003_RS17165	GCF_000148685.1	VRR-NUC domain-containing protein	VRR_NUC	Burkholderia sp. CCGE1003	Bacteria; Proteobacteria; Betaproteobacteria; Burkholderiales; Burkholderiaceae; Burkholderia
NZ_NKFL01000008.1	13418	13960	WP_089430182.1	CFB45_RS37450	GCF_002223055.1	VRR-NUC domain-containing protein	VRR_NUC	Burkholderia sp. HI2500	Bacteria; Proteobacteria; Betaproteobacteria; Burkholderiales; Burkholderiaceae; Burkholderia
NZ_LMUN01000078.1	16505	17107	WP_159002674.1	GSQ85_RS22745	GCF_009765935.1	VRR-NUC domain-containing protein	VRR_NUC	Burkholderia sp. S1	Bacteria; Proteobacteria; Betaproteobacteria; Burkholderiales; Burkholderiaceae; Burkholderia
NZ_PVGV01000095.1	110269	110790	WP_105866681.1	C6T64_RS32895	GCF_002981785.1	hypothetical protein	VRR_NUC	Burkholderia cenocepacia	Bacteria; Proteobacteria; Betaproteobacteria; Burkholderiales; Burkholderiaceae; Burkholderia; Burkholderia cepacia complex
NZ_VIWI01000004.1	84490	85752	WP_146253195.1	FHW27_RS10630	GCF_007829215.1	VRR-NUC domain-containing protein	VRR_NUC+TM+TM	Burkholderia cepacia	Bacteria; Proteobacteria; Betaproteobacteria; Burkholderiales; Burkholderiaceae; Burkholderia; Burkholderia cepacia complex
NZ_CP013430.1	3453141	3453953	WP_006401835.1	WK22_RS16025	GCF_001718755.1	VRR-NUC domain-containing protein	VRR_NUC	Burkholderia multivorans	Bacteria; Proteobacteria; Betaproteobacteria; Burkholderiales; Burkholderiaceae; Burkholderia; Burkholderia cepacia complex
NZ_PVFU01000060.1	6364	7176	WP_105767281.1	C6Q00_RS13775	GCF_002980875.1	nuclease	VRR_NUC	Burkholderia multivorans	Bacteria; Proteobacteria; Betaproteobacteria; Burkholderiales; Burkholderiaceae; Burkholderia; Burkholderia cepacia complex
NZ_FKJT01000001.1	2977125	2977604	WP_088923857.1	UA11_RS14515	GCF_900079585.1	nuclease	VRR_NUC	Burkholderia multivorans	Bacteria; Proteobacteria; Betaproteobacteria; Burkholderiales; Burkholderiaceae; Burkholderia; Burkholderia cepacia complex
NZ_LPIB01000032.1	92183	92722	WP_060284804.1	WL53_RS10240	GCF_001533285.1	VRR-NUC domain-containing protein	VRR_NUC	Burkholderia ubonensis	Bacteria; Proteobacteria; Betaproteobacteria; Burkholderiales; Burkholderiaceae; Burkholderia; Burkholderia cepacia complex
NZ_UFUH01000001.1	2366899	2367351	WP_010117454.1	DY265_RS11325	GCF_900446275.1	VRR-NUC domain-containing protein	VRR_NUC	Burkholderia oklahomensis	Bacteria; Proteobacteria; Betaproteobacteria; Burkholderiales; Burkholderiaceae; Burkholderia; pseudomallei group
NZ_KN150937.1	1310454	1310906	WP_009974475.1	DO63_RS05785	GCF_000757095.1	VRR-NUC domain-containing protein	VRR_NUC	Burkholderia pseudomallei	Bacteria; Proteobacteria; Betaproteobacteria; Burkholderiales; Burkholderiaceae; Burkholderia; pseudomallei group
NZ_KN150942.1	1761371	1761823	WP_038758004.1	DP56_RS21390	GCF_000757145.1	VRR-NUC domain-containing protein	VRR_NUC	Burkholderia pseudomallei	Bacteria; Proteobacteria; Betaproteobacteria; Burkholderiales; Burkholderiaceae; Burkholderia; pseudomallei group
NZ_KN150943.1	3054160	3054612	WP_038783929.1	DP57_RS13790	GCF_000757165.1	VRR-NUC domain-containing protein	VRR_NUC	Burkholderia pseudomallei	Bacteria; Proteobacteria; Betaproteobacteria; Burkholderiales; Burkholderiaceae; Burkholderia; pseudomallei group
NZ_KN150964.1	3542830	3543282	WP_038782177.1	DP44_RS29595	GCF_000757245.1	VRR-NUC domain-containing protein	VRR_NUC	Burkholderia pseudomallei	Bacteria; Proteobacteria; Betaproteobacteria; Burkholderiales; Burkholderiaceae; Burkholderia; pseudomallei group
[truncated: 1,338 more rows]

## Sheet: Aave_0499
Supplementary file 2B. List of Aave_0499 homologs.
nucleotide	start	end	pid	locus	assembly	product	pfam	organism	classification
[truncated: 296 more rows]

## Sheet: IdrD
Supplementary file 2C. List of IdrD homologs.
[truncated: 398 more rows]

## Sheet: PoNe
Supplementary file 2D. List of PoNe homologs.
[truncated: 1,235 more rows]

[truncated: 6 more sheets: KIAA1018, T1p21, PmgM, HP1472, Bce1019, TseT]
