# Supplementary material for: Antibacterial T6SS effectors with a VRR-Nuc domain are structure-specific nucleases
Source: eLife. 2022 Oct 13;11:e82437. doi: 10.7554/eLife.82437 (PMC9635880; doi:10.7554/eLife.82437)
Supplement: Supplementary file 3. [file elife-82437-supp3.xlsx]

## Sheet: TseV
Supplementary file 3A. Genomic context of each TseV homolog.
nucleotide	block_id	start	end	PDDExK	proteinID	locus	assembly	product	pfam	organism	classification
CP004095.1	1	2352255	2353370	0	AGK47851.1	BTI_2157	GCA_000194745.1	transposase DDE domain protein	DDE_Tnp_1_assoc+DDE_Tnp_1	Burkholderia thailandensis MSMB121	Bacteria; Proteobacteria; Betaproteobacteria; Burkholderiales; Burkholderiaceae; Burkholderia; pseudomallei group
CP004095.1	1	2353950	2355182	0	AGK47114.1	BTI_2160	GCA_000194745.1	phage integrase family protein	Arm-DNA-bind_3+Phage_int_SAM_3+Phage_integrase	Burkholderia thailandensis MSMB121	Bacteria; Proteobacteria; Betaproteobacteria; Burkholderiales; Burkholderiaceae; Burkholderia; pseudomallei group
CP004095.1	1	2355487	2356569	0	AGK46279.1	BTI_2161	GCA_000194745.1	hypothetical protein	DUF3396	Burkholderia thailandensis MSMB121	Bacteria; Proteobacteria; Betaproteobacteria; Burkholderiales; Burkholderiaceae; Burkholderia; pseudomallei group
CP004095.1	1	2356575	2357306	1	AGK49274.1	BTI_2162	GCA_000194745.1	VRR-NUC domain protein	VRR_NUC	Burkholderia thailandensis MSMB121	Bacteria; Proteobacteria; Betaproteobacteria; Burkholderiales; Burkholderiaceae; Burkholderia; pseudomallei group
CP004095.1	1	2357303	2357824	0	AGK47106.1	BTI_2163	GCA_000194745.1	PAAR motif family protein	PAAR_motif	Burkholderia thailandensis MSMB121	Bacteria; Proteobacteria; Betaproteobacteria; Burkholderiales; Burkholderiaceae; Burkholderia; pseudomallei group
CP004095.1	1	2358807	2359034	0	AGK48444.1	BTI_2164	GCA_000194745.1	prophage CP4-57 regulatory family protein	Phage_AlpA	Burkholderia thailandensis MSMB121	Bacteria; Proteobacteria; Betaproteobacteria; Burkholderiales; Burkholderiaceae; Burkholderia; pseudomallei group
CP004095.1	1	2359058	2359930	0	AGK46775.1	BTI_2165	GCA_000194745.1	cobQ/CobB/MinD/ParA nucleotide binding domain protein	AAA_31	Burkholderia thailandensis MSMB121	Bacteria; Proteobacteria; Betaproteobacteria; Burkholderiales; Burkholderiaceae; Burkholderia; pseudomallei group
CP006608.1	2	3130201	3131199	0	AGR60326.1	A464_3142	GCA_000194745.1	VgrG protein	Phage_base_V+Gp5_C	Salmonella bongori N268-08	Bacteria; Proteobacteria; Gammaproteobacteria; Enterobacterales; Enterobacteriaceae; Salmonella
CP006608.1	2	3131218	3132465	0	AGR60327.1	A464_3143	GCA_000194745.1	hypothetical protein		Salmonella bongori N268-08	Bacteria; Proteobacteria; Gammaproteobacteria; Enterobacterales; Enterobacteriaceae; Salmonella
CP006608.1	2	3132475	3132711	0	AGR60328.1	A464_3144	GCA_000194745.1	hypothetical protein		Salmonella bongori N268-08	Bacteria; Proteobacteria; Gammaproteobacteria; Enterobacterales; Enterobacteriaceae; Salmonella
CP006608.1	2	3132735	3133811	1	AGR60329.1	A464_3145	GCA_000194745.1	hypothetical protein	DUF4150	Salmonella bongori N268-08	Bacteria; Proteobacteria; Gammaproteobacteria; Enterobacterales; Enterobacteriaceae; Salmonella
CP006608.1	2	3133835	3134764	0	AGR60330.1	A464_3146	GCA_000194745.1	hypothetical protein	DUF3396	Salmonella bongori N268-08	Bacteria; Proteobacteria; Gammaproteobacteria; Enterobacterales; Enterobacteriaceae; Salmonella
CP006608.1	2	3134831	3135817	0	AGR60331.1	A464_3147	GCA_000194745.1	hypothetical protein	DUF3396	Salmonella bongori N268-08	Bacteria; Proteobacteria; Gammaproteobacteria; Enterobacterales; Enterobacteriaceae; Salmonella
CP006608.1	2	3135832	3136854	0	AGR60332.1	A464_3148	GCA_000194745.1	pentapeptide repeat family protein	DUF2169	Salmonella bongori N268-08	Bacteria; Proteobacteria; Gammaproteobacteria; Enterobacterales; Enterobacteriaceae; Salmonella
CP006608.1	2	3136851	3137906	0	AGR60333.1	A464_3149	GCA_000194745.1	hypothetical protein	SP	Salmonella bongori N268-08	Bacteria; Proteobacteria; Gammaproteobacteria; Enterobacterales; Enterobacteriaceae; Salmonella
CP006608.1	2	3137890	3139041	1	AGR60334.1	A464_3150	GCA_000194745.1	hypothetical protein	DUF4150	Salmonella bongori N268-08	Bacteria; Proteobacteria; Gammaproteobacteria; Enterobacterales; Enterobacteriaceae; Salmonella
CP006608.1	2	3139068	3140057	0	AGR60335.1	A464_3151	GCA_000194745.1	hypothetical protein	DUF3396	Salmonella bongori N268-08	Bacteria; Proteobacteria; Gammaproteobacteria; Enterobacterales; Enterobacteriaceae; Salmonella
CP006608.1	2	3140868	3141239	0	AGR60336.1	A464_3152	GCA_000194745.1	hypothetical protein	VRR_NUC	Salmonella bongori N268-08	Bacteria; Proteobacteria; Gammaproteobacteria; Enterobacterales; Enterobacteriaceae; Salmonella
CP006608.1	2	3141267	3142256	0	AGR60337.1	A464_3153	GCA_000194745.1	hypothetical protein	DUF3396	Salmonella bongori N268-08	Bacteria; Proteobacteria; Gammaproteobacteria; Enterobacterales; Enterobacteriaceae; Salmonella
CP006731.1	3	642042	642212	0	AHB68974.1	P262_00861	GCA_000504545.1	hypothetical protein		Cronobacter malonaticus	Bacteria; Proteobacteria; Gammaproteobacteria; Enterobacterales; Enterobacteriaceae; Cronobacter
CP006731.1	3	642209	642343	0	AHB68975.1	P262_00862	GCA_000504545.1	hypothetical protein		Cronobacter malonaticus	Bacteria; Proteobacteria; Gammaproteobacteria; Enterobacterales; Enterobacteriaceae; Cronobacter
CP006731.1	3	642419	642724	0	AHB68976.1	P262_00863	GCA_000504545.1	hypothetical protein		Cronobacter malonaticus	Bacteria; Proteobacteria; Gammaproteobacteria; Enterobacterales; Enterobacteriaceae; Cronobacter
CP006731.1	3	642751	643986	1	AHB68977.1	P262_00864	GCA_000504545.1	hypothetical protein	VRR_NUC	Cronobacter malonaticus	Bacteria; Proteobacteria; Gammaproteobacteria; Enterobacterales; Enterobacteriaceae; Cronobacter
CP006731.1	3	643998	645194	0	AHB68978.1	P262_00865	GCA_000504545.1	hypothetical protein	DUF3396	Cronobacter malonaticus	Bacteria; Proteobacteria; Gammaproteobacteria; Enterobacterales; Enterobacteriaceae; Cronobacter
CP006731.1	3	645245	646222	0	AHB68979.1	P262_00866	GCA_000504545.1	hypothetical protein	DUF3396	Cronobacter malonaticus	Bacteria; Proteobacteria; Gammaproteobacteria; Enterobacterales; Enterobacteriaceae; Cronobacter
CP006731.1	3	646688	647407	0	AHB68980.1	P262_00868	GCA_000504545.1	yqgA protein	DUF554	Cronobacter malonaticus	Bacteria; Proteobacteria; Gammaproteobacteria; Enterobacterales; Enterobacteriaceae; Cronobacter
CP009161.1	4	3551586	3551999	0	AIV48575.1	X988_3074	GCA_000504545.1	phage tail protein I	Tail_P2_I	Burkholderia pseudomallei TSV 48	Bacteria; Proteobacteria; Betaproteobacteria; Burkholderiales; Burkholderiaceae; Burkholderia; pseudomallei group
CP009161.1	4	3551992	3552318	0	AIV48183.1	X988_3075	GCA_000504545.1	baseplate J-like family protein	Baseplate_J	Burkholderia pseudomallei TSV 48	Bacteria; Proteobacteria; Betaproteobacteria; Burkholderiales; Burkholderiaceae; Burkholderia; pseudomallei group
CP009161.1	4	3553351	3553881	0	AIV47228.1	X988_3076	GCA_000504545.1	PAAR motif family protein	PAAR_motif	Burkholderia pseudomallei TSV 48	Bacteria; Proteobacteria; Betaproteobacteria; Burkholderiales; Burkholderiaceae; Burkholderia; pseudomallei group
CP009161.1	4	3554103	3554657	1	AIV47030.1	X988_3077	GCA_000504545.1	putative bacteriophage gp30 protein	VRR_NUC	Burkholderia pseudomallei TSV 48	Bacteria; Proteobacteria; Betaproteobacteria; Burkholderiales; Burkholderiaceae; Burkholderia; pseudomallei group
CP009161.1	4	3554663	3555781	0	AIV49802.1	X988_3078	GCA_000504545.1	hypothetical protein	DUF3396	Burkholderia pseudomallei TSV 48	Bacteria; Proteobacteria; Betaproteobacteria; Burkholderiales; Burkholderiaceae; Burkholderia; pseudomallei group
CP009161.1	4	3555973	3556845	0	AIV47455.1	X988_3079	GCA_000504545.1	HNH endonuclease family protein	HNH_4	Burkholderia pseudomallei TSV 48	Bacteria; Proteobacteria; Betaproteobacteria; Burkholderiales; Burkholderiaceae; Burkholderia; pseudomallei group
CP009161.1	4	3556948	3558312	0	AIV48338.1	X988_3080	GCA_000504545.1	hypothetical protein		Burkholderia pseudomallei TSV 48	Bacteria; Proteobacteria; Betaproteobacteria; Burkholderiales; Burkholderiaceae; Burkholderia; pseudomallei group
CP013357.1	5	27688	28164	0	AOI44022.1	WG70_13120	GCA_001274595.1	hypothetical protein	DUF5051	Burkholderia oklahomensis EO147	Bacteria; Proteobacteria; Betaproteobacteria; Burkholderiales; Burkholderiaceae; Burkholderia; pseudomallei group
CP013357.1	5	28181	28648	0	AOI40714.1	WG70_13125	GCA_001274595.1	hypothetical protein	HAD_SAK_2	Burkholderia oklahomensis EO147	Bacteria; Proteobacteria; Betaproteobacteria; Burkholderiales; Burkholderiaceae; Burkholderia; pseudomallei group
CP013357.1	5	30095	30409	0	AOI40715.1	WG70_13135	GCA_001274595.1	hypothetical protein	SP+TM+TM	Burkholderia oklahomensis EO147	Bacteria; Proteobacteria; Betaproteobacteria; Burkholderiales; Burkholderiaceae; Burkholderia; pseudomallei group
CP013357.1	5	31104	31787	1	AOI40716.1	WG70_13140	GCA_001274595.1	nuclease	DUF4776+VRR_NUC	Burkholderia oklahomensis EO147	Bacteria; Proteobacteria; Betaproteobacteria; Burkholderiales; Burkholderiaceae; Burkholderia; pseudomallei group
CP013357.1	5	31104	31787	1	AOI40716.1	WG70_13140	GCA_001274595.1	nuclease	DUF4776+VRR_NUC	Burkholderia oklahomensis EO147	Bacteria; Proteobacteria; Betaproteobacteria; Burkholderiales; Burkholderiaceae; Burkholderia; pseudomallei group
CP013357.1	5	31832	32914	0	AOI40717.1	WG70_13145	GCA_001274595.1	hypothetical protein	DUF3396	Burkholderia oklahomensis EO147	Bacteria; Proteobacteria; Betaproteobacteria; Burkholderiales; Burkholderiaceae; Burkholderia; pseudomallei group
CP013357.1	5	33045	33629	0	AOI40718.1	WG70_13150	GCA_001274595.1	hypothetical protein	SP+TM+TM+TM+TM+TM	Burkholderia oklahomensis EO147	Bacteria; Proteobacteria; Betaproteobacteria; Burkholderiales; Burkholderiaceae; Burkholderia; pseudomallei group
CP013357.1	5	34057	34959	0	AOI44023.1	WG70_13155	GCA_001274595.1	chromosome partitioning protein ParB	ParBc+RepB	Burkholderia oklahomensis EO147	Bacteria; Proteobacteria; Betaproteobacteria; Burkholderiales; Burkholderiaceae; Burkholderia; pseudomallei group
CP013737.1	6	4754944	4755924	0	ALU91195.1	Hrubri_4046	GCA_001274595.1	allophanate hydrolase subunit 2 protein	CT_A_B	Herbaspirillum rubrisubalbicans M1	Bacteria; Proteobacteria; Betaproteobacteria; Burkholderiales; Oxalobacteraceae; Herbaspirillum
CP013737.1	6	4756050	4757381	0	ALU91196.1	Hrubri_4047	GCA_001274595.1	Cytosine/purine permease protein	Transp_cyt_pur+TM+TM	Herbaspirillum rubrisubalbicans M1	Bacteria; Proteobacteria; Betaproteobacteria; Burkholderiales; Oxalobacteraceae; Herbaspirillum
CP013737.1	6	4757595	4758164	0	ALU91197.1	Hrubri_4048	GCA_001274595.1	hypothetical protein	PAAR_motif	Herbaspirillum rubrisubalbicans M1	Bacteria; Proteobacteria; Betaproteobacteria; Burkholderiales; Oxalobacteraceae; Herbaspirillum
CP013737.1	6	4758164	4759153	1	ALU91198.1	Hrubri_4049	GCA_001274595.1	hypothetical protein	VRR_NUC+TM+TM	Herbaspirillum rubrisubalbicans M1	Bacteria; Proteobacteria; Betaproteobacteria; Burkholderiales; Oxalobacteraceae; Herbaspirillum
CP013737.1	6	4759153	4760346	0	ALU91199.1	Hrubri_4050	GCA_001274595.1	hypothetical protein	DUF3396	Herbaspirillum rubrisubalbicans M1	Bacteria; Proteobacteria; Betaproteobacteria; Burkholderiales; Oxalobacteraceae; Herbaspirillum
CP013737.1	6	4760532	4761368	0	ALU91200.1	Hrubri_4051	GCA_001274595.1	ABC-type branched-chain amino acid transport system, ATPase component protein	ABC_tran	Herbaspirillum rubrisubalbicans M1	Bacteria; Proteobacteria; Betaproteobacteria; Burkholderiales; Oxalobacteraceae; Herbaspirillum
CP013737.1	6	4761365	4763155	0	ALU91201.1	Hrubri_4052	GCA_001274595.1	ABC-type branched-chain amino acid transport system, composite ATP-binding/permease components protein	SP+BPD_transp_2+ABC_tran+BCA_ABC_TP_C	Herbaspirillum rubrisubalbicans M1	Bacteria; Proteobacteria; Betaproteobacteria; Burkholderiales; Oxalobacteraceae; Herbaspirillum
CP013425.1	7	1412112	1412507	0	AOJ83803.1	WS86_24560	GCA_001524625.2	hypothetical protein		Burkholderia savannae	Bacteria; Proteobacteria; Betaproteobacteria; Burkholderiales; Burkholderiaceae; Burkholderia; pseudomallei group
CP013425.1	7	1412998	1413393	0	AOJ83804.1	WS86_24565	GCA_001524625.2	hypothetical protein	DUF3693	Burkholderia savannae	Bacteria; Proteobacteria; Betaproteobacteria; Burkholderiales; Burkholderiaceae; Burkholderia; pseudomallei group
CP013425.1	7	1413922	1414986	0	AOJ83805.1	WS86_24570	GCA_001524625.2	hypothetical protein	DUF3396	Burkholderia savannae	Bacteria; Proteobacteria; Betaproteobacteria; Burkholderiales; Burkholderiaceae; Burkholderia; pseudomallei group
CP013425.1	7	1414989	1415438	1	AOJ85048.1	WS86_24575	GCA_001524625.2	hypothetical protein	VRR_NUC	Burkholderia savannae	Bacteria; Proteobacteria; Betaproteobacteria; Burkholderiales; Burkholderiaceae; Burkholderia; pseudomallei group
CP013425.1	7	1416392	1416598	0	AOJ83806.1	WS86_24580	GCA_001524625.2	hypothetical protein	DDE_Tnp_Tn3	Burkholderia savannae	Bacteria; Proteobacteria; Betaproteobacteria; Burkholderiales; Burkholderiaceae; Burkholderia; pseudomallei group
CP013425.1	7	1416781	1417713	0	AOJ83807.1	WS86_24585	GCA_001524625.2	LysR family transcriptional regulator	HTH_1+LysR_substrate	Burkholderia savannae	Bacteria; Proteobacteria; Betaproteobacteria; Burkholderiales; Burkholderiaceae; Burkholderia; pseudomallei group
CP013425.1	7	1417878	1418339	0	AOJ83808.1	WS86_24590	GCA_001524625.2	cupin	SP+Cupin_2	Burkholderia savannae	Bacteria; Proteobacteria; Betaproteobacteria; Burkholderiales; Burkholderiaceae; Burkholderia; pseudomallei group
CP013430.1	8	3450985	3451851	0	AOJ94309.1	WK22_16000	GCA_001524625.2	Patatin	Patatin	Burkholderia multivorans	Bacteria; Proteobacteria; Betaproteobacteria; Burkholderiales; Burkholderiaceae; Burkholderia; Burkholderia cepacia complex
CP013430.1	8	3451860	3452264	0	AOJ94310.1	WK22_16005	GCA_001524625.2	phenylacetic acid degradation protein	4HBT	Burkholderia multivorans	Bacteria; Proteobacteria; Betaproteobacteria; Burkholderiales; Burkholderiaceae; Burkholderia; Burkholderia cepacia complex
CP013430.1	8	3452714	3453238	0	AOJ94311.1	WK22_16015	GCA_001524625.2	hypothetical protein	PAAR_motif	Burkholderia multivorans	Bacteria; Proteobacteria; Betaproteobacteria; Burkholderiales; Burkholderiaceae; Burkholderia; Burkholderia cepacia complex
CP013430.1	8	3453141	3453953	1	AOJ94312.1	WK22_16020	GCA_001524625.2	nuclease	VRR_NUC	Burkholderia multivorans	Bacteria; Proteobacteria; Betaproteobacteria; Burkholderiales; Burkholderiaceae; Burkholderia; Burkholderia cepacia complex
CP013430.1	8	3454886	3455989	0	AOJ94587.1	WK22_16025	GCA_001524625.2	hypothetical protein	DUF3396	Burkholderia multivorans	Bacteria; Proteobacteria; Betaproteobacteria; Burkholderiales; Burkholderiaceae; Burkholderia; Burkholderia cepacia complex
CP013430.1	8	3456870	3457511	0	AOJ94313.1	WK22_16030	GCA_001524625.2	hypothetical protein	Pribosyltran	Burkholderia multivorans	Bacteria; Proteobacteria; Betaproteobacteria; Burkholderiales; Burkholderiaceae; Burkholderia; Burkholderia cepacia complex
CP013430.1	8	3458006	3458749	0	AOJ94314.1	WK22_16035	GCA_001524625.2	hypothetical protein	DUF1275	Burkholderia multivorans	Bacteria; Proteobacteria; Betaproteobacteria; Burkholderiales; Burkholderiaceae; Burkholderia; Burkholderia cepacia complex
CP015648.1	9	1544139	1544504	0	ARN39826.1	A6747_07030	GCA_001524625.2	addiction module toxin RelE	Gp49	Pseudomonas aeruginosa	Bacteria; Proteobacteria; Gammaproteobacteria; Pseudomonadales; Pseudomonadaceae; Pseudomonas
CP015648.1	9	1544497	1544820	0	ARN39827.1	A6747_07035	GCA_001524625.2	transcriptional regulator	HTH_37	Pseudomonas aeruginosa	Bacteria; Proteobacteria; Gammaproteobacteria; Pseudomonadales; Pseudomonadaceae; Pseudomonas
CP015648.1	9	1545184	1546272	0	ARN39828.1	A6747_07040	GCA_001524625.2	hypothetical protein	DUF3396	Pseudomonas aeruginosa	Bacteria; Proteobacteria; Gammaproteobacteria; Pseudomonadales; Pseudomonadaceae; Pseudomonas
CP015648.1	9	1546289	1546735	1	ARN44061.1	A6747_07045	GCA_001524625.2	hypothetical protein	VRR_NUC+TM	Pseudomonas aeruginosa	Bacteria; Proteobacteria; Gammaproteobacteria; Pseudomonadales; Pseudomonadaceae; Pseudomonas
CP015648.1	9	1546802	1546990	0	ARN39829.1	A6747_07050	GCA_001524625.2	hypothetical protein		Pseudomonas aeruginosa	Bacteria; Proteobacteria; Gammaproteobacteria; Pseudomonadales; Pseudomonadaceae; Pseudomonas
CP015648.1	9	1546987	1547505	0	ARN39830.1	A6747_07055	GCA_001524625.2	Rhs element Vgr protein	PAAR_motif+PAAR_motif	Pseudomonas aeruginosa	Bacteria; Proteobacteria; Gammaproteobacteria; Pseudomonadales; Pseudomonadaceae; Pseudomonas
CP015648.1	9	1548117	1548552	0	ARN39831.1	A6747_07060	GCA_001524625.2	hypothetical protein		Pseudomonas aeruginosa	Bacteria; Proteobacteria; Gammaproteobacteria; Pseudomonadales; Pseudomonadaceae; Pseudomonas
CP022120.1	10	1727775	1728020	0	ASG56745.1	LFZ56_08520	GCA_001524625.2	hypothetical protein	SymE_toxin	Salmonella bongori serovar 66:z41:- str. SA19983605	Bacteria; Proteobacteria; Gammaproteobacteria; Enterobacterales; Enterobacteriaceae; Salmonella
CP022120.1	10	1728156	1729610	0	ASG54318.1	LFZ56_08525	GCA_001524625.2	AMP nucleosidase	AMNp_N+PNP_UDP_1	Salmonella bongori serovar 66:z41:- str. SA19983605	Bacteria; Proteobacteria; Gammaproteobacteria; Enterobacterales; Enterobacteriaceae; Salmonella
CP022120.1	10	1729941	1730924	0	ASG54319.1	LFZ56_08530	GCA_001524625.2	hypothetical protein	DUF3396	Salmonella bongori serovar 66:z41:- str. SA19983605	Bacteria; Proteobacteria; Gammaproteobacteria; Enterobacterales; Enterobacteriaceae; Salmonella
CP022120.1	10	1730946	1732010	1	ASG54320.1	LFZ56_08535	GCA_001524625.2	hypothetical protein	DUF4150	Salmonella bongori serovar 66:z41:- str. SA19983605	Bacteria; Proteobacteria; Gammaproteobacteria; Enterobacterales; Enterobacteriaceae; Salmonella
CP022120.1	10	1732374	1732961	0	ASG54321.1	LFZ56_08540	GCA_001524625.2	integrase	Arm-DNA-bind_3+AcylCoA_dehyd_C	Salmonella bongori serovar 66:z41:- str. SA19983605	Bacteria; Proteobacteria; Gammaproteobacteria; Enterobacterales; Enterobacteriaceae; Salmonella
CP022120.1	10	1735760	1736446	0	ASG54322.1	LFZ56_08555	GCA_001524625.2	cytoplasmic protein	HTH_46	Salmonella bongori serovar 66:z41:- str. SA19983605	Bacteria; Proteobacteria; Gammaproteobacteria; Enterobacterales; Enterobacteriaceae; Salmonella
CP022120.1	10	1736943	1739678	0	ASG54323.1	LFZ56_08560	GCA_001524625.2	outer membrane autotransporter barrel domain-containing protein	SP+AC_1+Autotransporter	Salmonella bongori serovar 66:z41:- str. SA19983605	Bacteria; Proteobacteria; Gammaproteobacteria; Enterobacterales; Enterobacteriaceae; Salmonella
AP014704.1	11	2358786	2359082	0	BAQ45708.1	Maq22A_c12310	GCA_001548015.1	hypothetical protein		Methylobacterium aquaticum	Bacteria; Proteobacteria; Alphaproteobacteria; Hyphomicrobiales; Methylobacteriaceae; Methylobacterium
AP014704.1	11	2359101	2359265	0	BAQ45709.1	Maq22A_c12315	GCA_001548015.1	hypothetical protein	DUF3396	Methylobacterium aquaticum	Bacteria; Proteobacteria; Alphaproteobacteria; Hyphomicrobiales; Methylobacteriaceae; Methylobacterium
AP014704.1	11	2359623	2360093	0	BAQ45710.1	Maq22A_c12320	GCA_001548015.1	hypothetical protein		Methylobacterium aquaticum	Bacteria; Proteobacteria; Alphaproteobacteria; Hyphomicrobiales; Methylobacteriaceae; Methylobacterium
AP014704.1	11	2360284	2360523	1	BAQ45711.1	Maq22A_c12325	GCA_001548015.1	hypothetical protein		Methylobacterium aquaticum	Bacteria; Proteobacteria; Alphaproteobacteria; Hyphomicrobiales; Methylobacteriaceae; Methylobacterium
AP014704.1	11	2360654	2362501	0	BAQ45712.1	Maq22A_c12330	GCA_001548015.1	RNA-binding S4 domain protein	DUF4150	Methylobacterium aquaticum	Bacteria; Proteobacteria; Alphaproteobacteria; Hyphomicrobiales; Methylobacteriaceae; Methylobacterium
AP014704.1	11	2361124	2362170	0	BAQ45713.1	Maq22A_c12340	GCA_001548015.1	uncharacterized protein conserved in bacteria	DUF2169	Methylobacterium aquaticum	Bacteria; Proteobacteria; Alphaproteobacteria; Hyphomicrobiales; Methylobacteriaceae; Methylobacterium
AP014704.1	11	2362180	2362443	0	BAQ45714.1	Maq22A_c12350	GCA_001548015.1	hypothetical protein		Methylobacterium aquaticum	Bacteria; Proteobacteria; Alphaproteobacteria; Hyphomicrobiales; Methylobacteriaceae; Methylobacterium
CP030241.1	12	2442906	2443937	0	AWY21210.1	DQF64_12385	GCA_001548015.1	hypothetical protein	CHAP	Moraxella bovis	Bacteria; Proteobacteria; Gammaproteobacteria; Pseudomonadales; Moraxellaceae; Moraxella
CP030241.1	12	2443885	2446728	0	AWY21211.1	DQF64_12390	GCA_001548015.1	type VI secretion system tip protein VgrG	Phage_GPD+Phage_base_V+T6SS_Vgr+DUF2345	Moraxella bovis	Bacteria; Proteobacteria; Gammaproteobacteria; Pseudomonadales; Moraxellaceae; Moraxella
CP030241.1	12	2446980	2448275	0	AWY21212.1	DQF64_12395	GCA_001548015.1	DUF3396 domain-containing protein	DUF3396	Moraxella bovis	Bacteria; Proteobacteria; Gammaproteobacteria; Pseudomonadales; Moraxellaceae; Moraxella
CP030241.1	12	2448303	2448962	1	AWY21745.1	DQF64_12400	GCA_001548015.1	hypothetical protein	VRR_NUC+TM	Moraxella bovis	Bacteria; Proteobacteria; Gammaproteobacteria; Pseudomonadales; Moraxellaceae; Moraxella
CP030241.1	12	2449210	2452041	0	AWY21213.1	DQF64_12405	GCA_001548015.1	hypothetical protein	Phage_GPD+Phage_base_V+T6SS_Vgr+DUF2345	Moraxella bovis	Bacteria; Proteobacteria; Gammaproteobacteria; Pseudomonadales; Moraxellaceae; Moraxella
CP030241.1	12	2452274	2453590	1	AWY21214.1	DQF64_12410	GCA_001548015.1	VRR-NUC domain-containing protein	VRR_NUC+TM	Moraxella bovis	Bacteria; Proteobacteria; Gammaproteobacteria; Pseudomonadales; Moraxellaceae; Moraxella
CP030241.1	12	2452274	2453590	1	AWY21214.1	DQF64_12410	GCA_001548015.1	VRR-NUC domain-containing protein	VRR_NUC+TM	Moraxella bovis	Bacteria; Proteobacteria; Gammaproteobacteria; Pseudomonadales; Moraxellaceae; Moraxella
CP030241.1	12	2453596	2454843	0	AWY21215.1	DQF64_12415	GCA_001548015.1	DUF3396 domain-containing protein	DUF3396	Moraxella bovis	Bacteria; Proteobacteria; Gammaproteobacteria; Pseudomonadales; Moraxellaceae; Moraxella
CP030241.1	12	2454931	2457783	0	AWY21216.1	DQF64_12420	GCA_001548015.1	type VI secretion system tip protein VgrG	Phage_GPD+Phage_base_V+T6SS_Vgr+DUF2345	Moraxella bovis	Bacteria; Proteobacteria; Gammaproteobacteria; Pseudomonadales; Moraxellaceae; Moraxella
CP030241.1	12	2458035	2458343	0	AWY21217.1	DQF64_12425	GCA_001548015.1	hypothetical protein		Moraxella bovis	Bacteria; Proteobacteria; Gammaproteobacteria; Pseudomonadales; Moraxellaceae; Moraxella
CADIJV010000020.1	13	62707	63000	0	CAB3661123.1	LMG26696_03377	GCA_000027065.2	hypothetical protein		Achromobacter pulmonis	Bacteria; Proteobacteria; Betaproteobacteria; Burkholderiales; Alcaligenaceae; Achromobacter
CADIJV010000020.1	13	63049	63711	0	CAB3661146.1	LMG26696_03378	GCA_000027065.2	hypothetical protein	SRAP	Achromobacter pulmonis	Bacteria; Proteobacteria; Betaproteobacteria; Burkholderiales; Alcaligenaceae; Achromobacter
CADIJV010000020.1	13	64462	65559	0	CAB3661165.1	LMG26696_03379	GCA_000027065.2	hypothetical protein	DUF3396	Achromobacter pulmonis	Bacteria; Proteobacteria; Betaproteobacteria; Burkholderiales; Alcaligenaceae; Achromobacter
CADIJV010000020.1	13	65568	66305	1	CAB3661178.1	LMG26696_03380	GCA_000027065.2	hypothetical protein	VRR_NUC	Achromobacter pulmonis	Bacteria; Proteobacteria; Betaproteobacteria; Burkholderiales; Alcaligenaceae; Achromobacter
CADIJV010000020.1	13	66302	66628	0	CAB3661197.1	LMG26696_03381	GCA_000027065.2	hypothetical protein	SP+SH3_16	Achromobacter pulmonis	Bacteria; Proteobacteria; Betaproteobacteria; Burkholderiales; Alcaligenaceae; Achromobacter
CADIJV010000020.1	13	67125	67571	0	CAB3661221.1	LMG26696_03382	GCA_000027065.2	hypothetical protein	TM	Achromobacter pulmonis	Bacteria; Proteobacteria; Betaproteobacteria; Burkholderiales; Alcaligenaceae; Achromobacter
CADIJV010000020.1	13	67812	68135	0	CAB3661239.1	LMG26696_03383	GCA_000027065.2	hypothetical protein	TM2	Achromobacter pulmonis	Bacteria; Proteobacteria; Betaproteobacteria; Burkholderiales; Alcaligenaceae; Achromobacter
CALF01000071.1	14	2433126	2433752	0	CCK07594.1	BN128_1539	GCA_000284615.1	Complete genome; segment 3/17	TM+TM	Cronobacter sakazakii 696	Bacteria; Proteobacteria; Gammaproteobacteria; Enterobacterales; Enterobacteriaceae; Cronobacter
CALF01000071.1	14	2434309	2435187	0	CCK07595.1	BN128_1540	GCA_000284615.1	FIG00554004: hypothetical protein	DUF3396	Cronobacter sakazakii 696	Bacteria; Proteobacteria; Gammaproteobacteria; Enterobacterales; Enterobacteriaceae; Cronobacter
CALF01000071.1	14	2435199	2435372	0	CCK07596.1	BN128_1541	GCA_000284615.1	Complete genome; segment 3/17	SP	Cronobacter sakazakii 696	Bacteria; Proteobacteria; Gammaproteobacteria; Enterobacterales; Enterobacteriaceae; Cronobacter
CALF01000071.1	14	2435381	2436190	1	CCK07597.1	BN128_1542	GCA_000284615.1	Complete genome; segment 3/17	VRR_NUC	Cronobacter sakazakii 696	Bacteria; Proteobacteria; Gammaproteobacteria; Enterobacterales; Enterobacteriaceae; Cronobacter
CALF01000071.1	14	2436248	2436523	0	CCK07598.1	BN128_1543	GCA_000284615.1	Complete genome; segment 3/17		Cronobacter sakazakii 696	Bacteria; Proteobacteria; Gammaproteobacteria; Enterobacterales; Enterobacteriaceae; Cronobacter
CALF01000071.1	14	2436523	2436939	0	CCK07599.1	BN128_1544	GCA_000284615.1	VgrG protein		Cronobacter sakazakii 696	Bacteria; Proteobacteria; Gammaproteobacteria; Enterobacterales; Enterobacteriaceae; Cronobacter
CALF01000071.1	14	2437030	2438295	0	CCK07600.1	BN128_1545	GCA_000284615.1	VgrG protein	Phage_base_V+T6SS_Vgr+DUF2345	Cronobacter sakazakii 696	Bacteria; Proteobacteria; Gammaproteobacteria; Enterobacterales; Enterobacteriaceae; Cronobacter
FO203363.1	15	2542179	2543153	0	CCG95956.1	MARHY2489	GCA_000284615.1	conserved hypothetical protein	DUF3396	Marinobacter nauticus ATCC 49840	Bacteria; Proteobacteria; Gammaproteobacteria; Alteromonadales; Alteromonadaceae; Marinobacter
FO203363.1	15	2543172	2543492	0	CCG95957.1	MARHY2490	GCA_000284615.1	conserved hypothetical protein		Marinobacter nauticus ATCC 49840	Bacteria; Proteobacteria; Gammaproteobacteria; Alteromonadales; Alteromonadaceae; Marinobacter
FO203363.1	15	2543542	2544516	0	CCG95958.1	MARHY2491	GCA_000284615.1	conserved hypothetical protein	DUF3396	Marinobacter nauticus ATCC 49840	Bacteria; Proteobacteria; Gammaproteobacteria; Alteromonadales; Alteromonadaceae; Marinobacter
FO203363.1	15	2544541	2545353	1	CCG95959.1	MARHY2492	GCA_000284615.1	hypothetical protein	VRR_NUC	Marinobacter nauticus ATCC 49840	Bacteria; Proteobacteria; Gammaproteobacteria; Alteromonadales; Alteromonadaceae; Marinobacter
FO203363.1	15	2544541	2545353	1	CCG95959.1	MARHY2492	GCA_000284615.1	hypothetical protein	VRR_NUC	Marinobacter nauticus ATCC 49840	Bacteria; Proteobacteria; Gammaproteobacteria; Alteromonadales; Alteromonadaceae; Marinobacter
FO203363.1	15	2545443	2546384	0	CCG95960.1	MARHY2493	GCA_000284615.1	hypothetical protein	DUF4123	Marinobacter nauticus ATCC 49840	Bacteria; Proteobacteria; Gammaproteobacteria; Alteromonadales; Alteromonadaceae; Marinobacter
FO203363.1	15	2546381	2548459	0	CCG95961.1	MARHY2494	GCA_000284615.1	Rhs element Vgr protein	Phage_GPD+Phage_base_V+DUF2345	Marinobacter nauticus ATCC 49840	Bacteria; Proteobacteria; Gammaproteobacteria; Alteromonadales; Alteromonadaceae; Marinobacter
FO203363.1	15	2548578	2550314	0	CCG95962.1	MARHY2495	GCA_000284615.1	putative alpha amylase, sucrose phosphorylase, (trans)glycosidase	Alpha-amylase+Malt_amylase_C	Marinobacter nauticus ATCC 49840	Bacteria; Proteobacteria; Gammaproteobacteria; Alteromonadales; Alteromonadaceae; Marinobacter
AAAAHX010000002.1	16	147644	149137	0	EAA0559741.1	DKG82_07265	GCA_001405255.1	conjugal transfer protein TraG	TraG_N	Salmonella enterica subsp. enterica serovar Lexington	Bacteria; Proteobacteria; Gammaproteobacteria; Enterobacterales; Enterobacteriaceae; Salmonella
AAAAHX010000002.1	16	149523	149795	0	EAA0559742.1	DKG82_07270	GCA_001405255.1	PAAR domain-containing protein	PAAR_motif	Salmonella enterica subsp. enterica serovar Lexington	Bacteria; Proteobacteria; Gammaproteobacteria; Enterobacterales; Enterobacteriaceae; Salmonella
AAAAHX010000002.1	16	149807	150949	0	EAA0559743.1	DKG82_07275	GCA_001405255.1	DUF3396 domain-containing protein	DUF3396	Salmonella enterica subsp. enterica serovar Lexington	Bacteria; Proteobacteria; Gammaproteobacteria; Enterobacterales; Enterobacteriaceae; Salmonella
AAAAHX010000002.1	16	150946	152472	1	EAA0559744.1	DKG82_07280	GCA_001405255.1	hypothetical protein	VRR_NUC+TM+TM	Salmonella enterica subsp. enterica serovar Lexington	Bacteria; Proteobacteria; Gammaproteobacteria; Enterobacterales; Enterobacteriaceae; Salmonella
AAAAHX010000002.1	16	152478	154652	0	EAA0559745.1	DKG82_07285	GCA_001405255.1	type VI secretion system tip protein VgrG	Phage_GPD+Phage_base_V	Salmonella enterica subsp. enterica serovar Lexington	Bacteria; Proteobacteria; Gammaproteobacteria; Enterobacterales; Enterobacteriaceae; Salmonella
AAAAHX010000002.1	16	155662	156123	0	EAA0559746.1	DKG82_07290	GCA_001405255.1	hypothetical protein		Salmonella enterica subsp. enterica serovar Lexington	Bacteria; Proteobacteria; Gammaproteobacteria; Enterobacterales; Enterobacteriaceae; Salmonella
AAAAHX010000002.1	16	156120	156341	0	EAA0559747.1	DKG82_07295	GCA_001405255.1	transcriptional regulator	HTH_35	Salmonella enterica subsp. enterica serovar Lexington	Bacteria; Proteobacteria; Gammaproteobacteria; Enterobacterales; Enterobacteriaceae; Salmonella
AAABTC010000074.1	17	2955	3341	0	EAA5286882.1	DPZ77_21910	GCA_001405255.1	DUF1311 domain-containing protein	SP+LprI	Salmonella enterica subsp. houtenae	Bacteria; Proteobacteria; Gammaproteobacteria; Enterobacterales; Enterobacteriaceae; Salmonella
AAABTC010000074.1	17	3342	4193	0	EAA5286883.1	DPZ77_21915	GCA_001405255.1	calcium sensor EFh	PG_binding_1+Pesticin	Salmonella enterica subsp. houtenae	Bacteria; Proteobacteria; Gammaproteobacteria; Enterobacterales; Enterobacteriaceae; Salmonella
AAABTC010000074.1	17	4363	5424	0	EAA5286884.1	DPZ77_21920	GCA_001405255.1	hypothetical protein	DUF3396	Salmonella enterica subsp. houtenae	Bacteria; Proteobacteria; Gammaproteobacteria; Enterobacterales; Enterobacteriaceae; Salmonella
AAABTC010000074.1	17	5372	6460	1	EAA5286885.1	DPZ77_21925	GCA_001405255.1	hypothetical protein	DUF4150+TM	Salmonella enterica subsp. houtenae	Bacteria; Proteobacteria; Gammaproteobacteria; Enterobacterales; Enterobacteriaceae; Salmonella
AAABTC010000074.1	17	6438	7517	0	EAA5286886.1	DPZ77_21930	GCA_001405255.1	hypothetical protein	SP	Salmonella enterica subsp. houtenae	Bacteria; Proteobacteria; Gammaproteobacteria; Enterobacterales; Enterobacteriaceae; Salmonella
AAABTC010000074.1	17	7514	8533	0	EAA5286887.1	DPZ77_21935	GCA_001405255.1	DUF2169 domain-containing protein	DUF2169	Salmonella enterica subsp. houtenae	Bacteria; Proteobacteria; Gammaproteobacteria; Enterobacterales; Enterobacteriaceae; Salmonella
AAABTC010000074.1	17	8548	8748	0	EAA5286888.1	DPZ77_21940	GCA_001405255.1	hypothetical protein		Salmonella enterica subsp. houtenae	Bacteria; Proteobacteria; Gammaproteobacteria; Enterobacterales; Enterobacteriaceae; Salmonella
AADHYF010000010.1	18	27094	28926	0	EAQ4906429.1	FCJ48_18345	GCA_005024745.1	lipase family protein	Lipase_3	Salmonella enterica	Bacteria; Proteobacteria; Gammaproteobacteria; Enterobacterales; Enterobacteriaceae; Salmonella
AADHYF010000010.1	18	28910	29680	0	EAQ4906430.1	FCJ48_18350	GCA_005024745.1	hypothetical protein	SP	Salmonella enterica	Bacteria; Proteobacteria; Gammaproteobacteria; Enterobacterales; Enterobacteriaceae; Salmonella
AADHYF010000010.1	18	29761	30027	0	EAQ4906431.1	FCJ48_18355	GCA_005024745.1	PAAR domain-containing protein	PAAR_motif	Salmonella enterica	Bacteria; Proteobacteria; Gammaproteobacteria; Enterobacterales; Enterobacteriaceae; Salmonella
AADHYF010000010.1	18	31497	32864	1	EAQ4906432.1	FCJ48_18370	GCA_005024745.1	hypothetical protein		Salmonella enterica	Bacteria; Proteobacteria; Gammaproteobacteria; Enterobacterales; Enterobacteriaceae; Salmonella
AADHYF010000010.1	18	32868	34103	0	EAQ4906433.1	FCJ48_18375	GCA_005024745.1	DUF3396 domain-containing protein	DUF3396	Salmonella enterica	Bacteria; Proteobacteria; Gammaproteobacteria; Enterobacterales; Enterobacteriaceae; Salmonella
AADHYF010000010.1	18	36377	37246	0	EAQ4906434.1	FCJ48_18385	GCA_005024745.1	hypothetical protein	DUF6402	Salmonella enterica	Bacteria; Proteobacteria; Gammaproteobacteria; Enterobacterales; Enterobacteriaceae; Salmonella
AADHYF010000010.1	18	37243	37611	0	EAQ4906435.1	FCJ48_18390	GCA_005024745.1	hypothetical protein	DUF6201	Salmonella enterica	Bacteria; Proteobacteria; Gammaproteobacteria; Enterobacterales; Enterobacteriaceae; Salmonella
AADPXS010000163.1	19	160	456	0	EAT2397835.1	EJQ33_21875	GCA_005024745.1	type I addiction module toxin, SymE family	SymE_toxin	Salmonella enterica	Bacteria; Proteobacteria; Gammaproteobacteria; Enterobacterales; Enterobacteriaceae; Salmonella
AADPXS010000163.1	19	559	2013	0	EAT2397836.1	EJQ33_21880	GCA_005024745.1	AMP nucleosidase	AMNp_N+PNP_UDP_1	Salmonella enterica	Bacteria; Proteobacteria; Gammaproteobacteria; Enterobacterales; Enterobacteriaceae; Salmonella
AADPXS010000163.1	19	2344	3327	0	EAT2397837.1	EJQ33_21885	GCA_005024745.1	DUF3396 domain-containing protein	DUF3396	Salmonella enterica	Bacteria; Proteobacteria; Gammaproteobacteria; Enterobacterales; Enterobacteriaceae; Salmonella
AADPXS010000163.1	19	3349	3763	1	EAT2397838.1	EJQ33_21890	GCA_005024745.1	hypothetical protein		Salmonella enterica	Bacteria; Proteobacteria; Gammaproteobacteria; Enterobacterales; Enterobacteriaceae; Salmonella
AAIIMR010000012.1	20	49712	51673	0	ECE6019208.1	DL121_13330	GCA_005768015.1	type VI secretion system tip protein VgrG	Phage_GPD+Phage_base_V+Gp5_C	Salmonella enterica subsp. enterica	Bacteria; Proteobacteria; Gammaproteobacteria; Enterobacterales; Enterobacteriaceae; Salmonella
AAIIMR010000012.1	20	51692	52951	0	ECE6019209.1	DL121_13335	GCA_005768015.1	hypothetical protein		Salmonella enterica subsp. enterica	Bacteria; Proteobacteria; Gammaproteobacteria; Enterobacterales; Enterobacteriaceae; Salmonella
AAIIMR010000012.1	20	52962	53198	0	ECE6019210.1	DL121_13340	GCA_005768015.1	hypothetical protein	DUF2345	Salmonella enterica subsp. enterica	Bacteria; Proteobacteria; Gammaproteobacteria; Enterobacterales; Enterobacteriaceae; Salmonella
AAIIMR010000012.1	20	53222	54403	1	ECE6019211.1	DL121_13345	GCA_005768015.1	hypothetical protein	DUF4150	Salmonella enterica subsp. enterica	Bacteria; Proteobacteria; Gammaproteobacteria; Enterobacterales; Enterobacteriaceae; Salmonella
AAIIMR010000012.1	20	54539	55528	0	ECE6019212.1	DL121_13350	GCA_005768015.1	hypothetical protein	DUF3396	Salmonella enterica subsp. enterica	Bacteria; Proteobacteria; Gammaproteobacteria; Enterobacterales; Enterobacteriaceae; Salmonella
AAIIMR010000012.1	20	55543	56565	0	ECE6019213.1	DL121_13355	GCA_005768015.1	DUF2169 domain-containing protein	DUF2169	Salmonella enterica subsp. enterica	Bacteria; Proteobacteria; Gammaproteobacteria; Enterobacterales; Enterobacteriaceae; Salmonella
AAIIMR010000012.1	20	56562	57617	0	ECE6019214.1	DL121_13360	GCA_005768015.1	hypothetical protein	SP	Salmonella enterica subsp. enterica	Bacteria; Proteobacteria; Gammaproteobacteria; Enterobacterales; Enterobacteriaceae; Salmonella
AAIKHS010000060.1	21	9940	10344	0	ECF1703726.1	E1B77_22845	GCA_005768015.1	DUF2169 domain-containing protein	DUF2169	Salmonella enterica subsp. enterica	Bacteria; Proteobacteria; Gammaproteobacteria; Enterobacterales; Enterobacteriaceae; Salmonella
AAIKHS010000060.1	21	10597	11508	0	ECF1703727.1	E1B77_22850	GCA_005768015.1	hypothetical protein		Salmonella enterica subsp. enterica	Bacteria; Proteobacteria; Gammaproteobacteria; Enterobacterales; Enterobacteriaceae; Salmonella
AAIKHS010000060.1	21	11513	12475	0	ECF1703728.1	E1B77_22855	GCA_005768015.1	DUF3396 domain-containing protein	DUF3396	Salmonella enterica subsp. enterica	Bacteria; Proteobacteria; Gammaproteobacteria; Enterobacterales; Enterobacteriaceae; Salmonella
AAIKHS010000060.1	21	12497	13030	1	ECF1703729.1	E1B77_22860	GCA_005768015.1	hypothetical protein	VRR_NUC	Salmonella enterica subsp. enterica	Bacteria; Proteobacteria; Gammaproteobacteria; Enterobacterales; Enterobacteriaceae; Salmonella
AAIKHS010000060.1	21	14203	14487	0	ECF1703730.1	E1B77_22870	GCA_005768015.1	type VI secretion system PAAR protein	PAAR_motif	Salmonella enterica subsp. enterica	Bacteria; Proteobacteria; Gammaproteobacteria; Enterobacterales; Enterobacteriaceae; Salmonella
AAIKHS010000060.1	21	14605	15225	0	ECF1703731.1	E1B77_22875	GCA_005768015.1	hypothetical protein		Salmonella enterica subsp. enterica	Bacteria; Proteobacteria; Gammaproteobacteria; Enterobacterales; Enterobacteriaceae; Salmonella
AAIKHS010000060.1	21	15334	16125	0	ECF1703732.1	E1B77_22880	GCA_005768015.1	hypothetical protein		Salmonella enterica subsp. enterica	Bacteria; Proteobacteria; Gammaproteobacteria; Enterobacterales; Enterobacteriaceae; Salmonella
AAMIBC010000001.1	22	476004	476951	0	EDH5629298.1	CB172_02270	GCA_000154065.1	hypothetical protein	DUF3289	Salmonella enterica subsp. enterica serovar Claibornei	Bacteria; Proteobacteria; Gammaproteobacteria; Enterobacterales; Enterobacteriaceae; Salmonella
AAMIBC010000001.1	22	477728	478045	0	EDH5629299.1	CB172_02280	GCA_000154065.1	hypothetical protein	DUF2169	Salmonella enterica subsp. enterica serovar Claibornei	Bacteria; Proteobacteria; Gammaproteobacteria; Enterobacterales; Enterobacteriaceae; Salmonella
AAMIBC010000001.1	22	478059	479045	0	EDH5629300.1	CB172_02285	GCA_000154065.1	hypothetical protein	DUF3396	Salmonella enterica subsp. enterica serovar Claibornei	Bacteria; Proteobacteria; Gammaproteobacteria; Enterobacterales; Enterobacteriaceae; Salmonella
AAMIBC010000001.1	22	479066	480139	1	EDH5629301.1	CB172_02290	GCA_000154065.1	hypothetical protein	DUF4150	Salmonella enterica subsp. enterica serovar Claibornei	Bacteria; Proteobacteria; Gammaproteobacteria; Enterobacterales; Enterobacteriaceae; Salmonella
AAMIBC010000001.1	22	480228	480899	0	EDH5629302.1	CB172_02295	GCA_000154065.1	hypothetical protein	Imm52	Salmonella enterica subsp. enterica serovar Claibornei	Bacteria; Proteobacteria; Gammaproteobacteria; Enterobacterales; Enterobacteriaceae; Salmonella
AAMIBC010000001.1	22	480912	481394	0	EDH5629303.1	CB172_02300	GCA_000154065.1	hypothetical protein	Tox-REase-5+TM	Salmonella enterica subsp. enterica serovar Claibornei	Bacteria; Proteobacteria; Gammaproteobacteria; Enterobacterales; Enterobacteriaceae; Salmonella
AAMIBC010000001.1	22	481681	482346	0	EDH5629304.1	CB172_02305	GCA_000154065.1	hypothetical protein	SP+DUF2931	Salmonella enterica subsp. enterica serovar Claibornei	Bacteria; Proteobacteria; Gammaproteobacteria; Enterobacterales; Enterobacteriaceae; Salmonella
AAPTQP010000008.1	23	3316	3585	0	EEH7386439.1	G3B04_001788	GCA_000154065.1	hypothetical protein		Salmonella enterica subsp. enterica	Bacteria; Proteobacteria; Gammaproteobacteria; Enterobacterales; Enterobacteriaceae; Salmonella
AAPTQP010000008.1	23	3582	3803	0	EEH7386440.1	G3B04_001789	GCA_000154065.1	transcriptional regulator	HTH_35	Salmonella enterica subsp. enterica	Bacteria; Proteobacteria; Gammaproteobacteria; Enterobacterales; Enterobacteriaceae; Salmonella
AAPTQP010000008.1	23	3800	4261	0	EEH7386441.1	G3B04_001790	GCA_000154065.1	hypothetical protein		Salmonella enterica subsp. enterica	Bacteria; Proteobacteria; Gammaproteobacteria; Enterobacterales; Enterobacteriaceae; Salmonella
AAPTQP010000008.1	23	7452	8978	1	EEH7386442.1	G3B04_001792	GCA_000154065.1	hypothetical protein	VRR_NUC+TM+TM	Salmonella enterica subsp. enterica	Bacteria; Proteobacteria; Gammaproteobacteria; Enterobacterales; Enterobacteriaceae; Salmonella
AAPTQP010000008.1	23	8975	10117	0	EEH7386443.1	G3B04_001793	GCA_000154065.1	DUF3396 domain-containing protein	DUF3396	Salmonella enterica subsp. enterica	Bacteria; Proteobacteria; Gammaproteobacteria; Enterobacterales; Enterobacteriaceae; Salmonella
AAPTQP010000008.1	23	10129	10401	0	EEH7386444.1	G3B04_001794	GCA_000154065.1	PAAR domain-containing protein	PAAR_motif	Salmonella enterica subsp. enterica	Bacteria; Proteobacteria; Gammaproteobacteria; Enterobacterales; Enterobacteriaceae; Salmonella
AAPTQP010000008.1	23	10787	12280	0	EEH7386445.1	G3B04_001795	GCA_000154065.1	conjugal transfer protein TraG	TraG_N	Salmonella enterica subsp. enterica	Bacteria; Proteobacteria; Gammaproteobacteria; Enterobacterales; Enterobacteriaceae; Salmonella
AEXE01001908.1	24	207	1067	0	EGD00509.1	B1M_31190	GCA_000143415.2	hypothetical protein	DUF3592+DUF3592	Burkholderia sp. TJI49	Bacteria; Proteobacteria; Betaproteobacteria; Burkholderiales; Burkholderiaceae; Burkholderia
AEXE01001908.1	24	1491	1796	0	EGD00510.1	B1M_31195	GCA_000143415.2	hypothetical protein		Burkholderia sp. TJI49	Bacteria; Proteobacteria; Betaproteobacteria; Burkholderiales; Burkholderiaceae; Burkholderia
AEXE01001908.1	24	2701	3816	0	EGD00511.1	B1M_31200	GCA_000143415.2	putative bacteriophage gp31 protein	DUF3396	Burkholderia sp. TJI49	Bacteria; Proteobacteria; Betaproteobacteria; Burkholderiales; Burkholderiaceae; Burkholderia
AEXE01001908.1	24	3822	4268	1	EGD00512.1	B1M_31205	GCA_000143415.2	putative bacteriophage gp30 protein	VRR_NUC	Burkholderia sp. TJI49	Bacteria; Proteobacteria; Betaproteobacteria; Burkholderiales; Burkholderiaceae; Burkholderia
AEXE01001908.1	24	4583	5038	0	EGD00513.1	B1M_31210	GCA_000143415.2	putative bacteriophage gp29 protein	PAAR_motif	Burkholderia sp. TJI49	Bacteria; Proteobacteria; Betaproteobacteria; Burkholderiales; Burkholderiaceae; Burkholderia
AEXE01001908.1	24	5552	5956	0	EGD00514.1	B1M_31215	GCA_000143415.2	phenylacetic acid degradation-related protein	4HBT	Burkholderia sp. TJI49	Bacteria; Proteobacteria; Betaproteobacteria; Burkholderiales; Burkholderiaceae; Burkholderia
AEXE01001908.1	24	5965	6831	0	EGD00515.1	B1M_31220	GCA_000143415.2	patatin	Patatin	Burkholderia sp. TJI49	Bacteria; Proteobacteria; Betaproteobacteria; Burkholderiales; Burkholderiaceae; Burkholderia
AJVC01000006.1	25	528644	528991	0	EIJ44879.1	GWL_43190	GCA_000261365.1	periplasmic divalent cation tolerance protein	CutA1	Herbaspirillum sp. GW103	Bacteria; Proteobacteria; Betaproteobacteria; Burkholderiales; Oxalobacteraceae; Herbaspirillum
AJVC01000006.1	25	529026	530816	0	EIJ44880.1	GWL_43200	GCA_000261365.1	thiol:disulfide interchange transmembrane protein	SP+DsbC+DsbD+TM+TM+Thioredoxin_7	Herbaspirillum sp. GW103	Bacteria; Proteobacteria; Betaproteobacteria; Burkholderiales; Oxalobacteraceae; Herbaspirillum
AJVC01000006.1	25	530928	531566	0	EIJ44881.1	GWL_43210	GCA_000261365.1	antioxidant oxidoreductase	AhpC-TSA+1-cysPrx_C	Herbaspirillum sp. GW103	Bacteria; Proteobacteria; Betaproteobacteria; Burkholderiales; Oxalobacteraceae; Herbaspirillum
AJVC01000006.1	25	532478	533593	1	EIJ44882.1	GWL_43220	GCA_000261365.1	hypothetical protein	DUF4150	Herbaspirillum sp. GW103	Bacteria; Proteobacteria; Betaproteobacteria; Burkholderiales; Oxalobacteraceae; Herbaspirillum
AJVC01000006.1	25	533600	534580	0	EIJ44883.1	GWL_43230	GCA_000261365.1	hypothetical protein	DUF3396	Herbaspirillum sp. GW103	Bacteria; Proteobacteria; Betaproteobacteria; Burkholderiales; Oxalobacteraceae; Herbaspirillum
AJVC01000006.1	25	534591	535535	0	EIJ44884.1	GWL_43240	GCA_000261365.1	LysR family transcription regulator protein	HTH_1+LysR_substrate	Herbaspirillum sp. GW103	Bacteria; Proteobacteria; Betaproteobacteria; Burkholderiales; Oxalobacteraceae; Herbaspirillum
AJVC01000006.1	25	535740	536879	0	EIJ44885.1	GWL_43250	GCA_000261365.1	4-hydroxybutyrate dehydrogenase	Fe-ADH	Herbaspirillum sp. GW103	Bacteria; Proteobacteria; Betaproteobacteria; Burkholderiales; Oxalobacteraceae; Herbaspirillum
CM001559.1	26	2997662	2997901	0	EJL07247.1	Pchl3084_2556	GCA_000261365.1	hypothetical protein		Pseudomonas chlororaphis subsp. aureofaciens 30-84	Bacteria; Proteobacteria; Gammaproteobacteria; Pseudomonadales; Pseudomonadaceae; Pseudomonas
CM001559.1	26	2998316	2998558	0	EJL05978.1	Pchl3084_2557	GCA_000261365.1	hypothetical protein		Pseudomonas chlororaphis subsp. aureofaciens 30-84	Bacteria; Proteobacteria; Gammaproteobacteria; Pseudomonadales; Pseudomonadaceae; Pseudomonas
CM001559.1	26	2998576	2998815	0	EJL07173.1	Pchl3084_2558	GCA_000261365.1	hypothetical protein		Pseudomonas chlororaphis subsp. aureofaciens 30-84	Bacteria; Proteobacteria; Gammaproteobacteria; Pseudomonadales; Pseudomonadaceae; Pseudomonas
CM001559.1	26	2998902	2999288	1	EJL06220.1	Pchl3084_2559	GCA_000261365.1	hypothetical protein	VRR_NUC+TM	Pseudomonas chlororaphis subsp. aureofaciens 30-84	Bacteria; Proteobacteria; Gammaproteobacteria; Pseudomonadales; Pseudomonadaceae; Pseudomonas
CM001559.1	26	2999304	3000392	0	EJL07013.1	Pchl3084_2560	GCA_000261365.1	hypothetical protein	DUF3396	Pseudomonas chlororaphis subsp. aureofaciens 30-84	Bacteria; Proteobacteria; Gammaproteobacteria; Pseudomonadales; Pseudomonadaceae; Pseudomonas
CM001559.1	26	3000567	3001394	0	EJL06803.1	Pchl3084_2561	GCA_000261365.1	formyl transferase family protein	Formyl_trans_N	Pseudomonas chlororaphis subsp. aureofaciens 30-84	Bacteria; Proteobacteria; Gammaproteobacteria; Pseudomonadales; Pseudomonadaceae; Pseudomonas
CM001559.1	26	3001964	3002248	0	EJL06065.1	Pchl3084_2562	GCA_000261365.1	hypothetical protein	DUF3077	Pseudomonas chlororaphis subsp. aureofaciens 30-84	Bacteria; Proteobacteria; Gammaproteobacteria; Pseudomonadales; Pseudomonadaceae; Pseudomonas
AMZS01000061.1	27	18491	20368	0	EKU52228.1	ACINWC323_0737	GCA_000256585.3	putative potassium uptake protein	SP+K_trans	Acinetobacter sp. WC-323	Bacteria; Proteobacteria; Gammaproteobacteria; Pseudomonadales; Moraxellaceae; Acinetobacter; Acinetobacter calcoaceticus/baumannii complex
AMZS01000061.1	27	20709	20894	0	EKU52222.1	ACINWC323_0738	GCA_000256585.3	hypothetical protein	SP	Acinetobacter sp. WC-323	Bacteria; Proteobacteria; Gammaproteobacteria; Pseudomonadales; Moraxellaceae; Acinetobacter; Acinetobacter calcoaceticus/baumannii complex
AMZS01000061.1	27	21083	23899	0	EKU52219.1	ACINWC323_0739	GCA_000256585.3	phage-like baseplate assembly protein	Phage_GPD+Phage_base_V+T6SS_Vgr+DUF2345	Acinetobacter sp. WC-323	Bacteria; Proteobacteria; Gammaproteobacteria; Pseudomonadales; Moraxellaceae; Acinetobacter; Acinetobacter calcoaceticus/baumannii complex
AMZS01000061.1	27	23915	25204	1	EKU52216.1	ACINWC323_0740	GCA_000256585.3	VRR-NUC domain protein	VRR_NUC	Acinetobacter sp. WC-323	Bacteria; Proteobacteria; Gammaproteobacteria; Pseudomonadales; Moraxellaceae; Acinetobacter; Acinetobacter calcoaceticus/baumannii complex
AMZS01000061.1	27	25227	26462	0	EKU52242.1	ACINWC323_0741	GCA_000256585.3	PF11876 family protein	DUF3396	Acinetobacter sp. WC-323	Bacteria; Proteobacteria; Gammaproteobacteria; Pseudomonadales; Moraxellaceae; Acinetobacter; Acinetobacter calcoaceticus/baumannii complex
AMZS01000061.1	27	26558	27244	0	EKU52261.1	ACINWC323_0742	GCA_000256585.3	GAD-like protein	GAD-like+DUF1851	Acinetobacter sp. WC-323	Bacteria; Proteobacteria; Gammaproteobacteria; Pseudomonadales; Moraxellaceae; Acinetobacter; Acinetobacter calcoaceticus/baumannii complex
AMZS01000061.1	27	27451	28536	0	EKU52252.1	ACINWC323_0743	GCA_000256585.3	hypothetical protein		Acinetobacter sp. WC-323	Bacteria; Proteobacteria; Gammaproteobacteria; Pseudomonadales; Moraxellaceae; Acinetobacter; Acinetobacter calcoaceticus/baumannii complex
ANKP01000145.1	28	972	1310	0	EKZ97851.1	D769_18074	GCA_000256585.3	hypothetical protein		Cupriavidus sp. HMR-1	Bacteria; Proteobacteria; Betaproteobacteria; Burkholderiales; Burkholderiaceae; Cupriavidus
ANKP01000145.1	28	1363	1587	0	EKZ97852.1	D769_18079	GCA_000256585.3	hypothetical protein		Cupriavidus sp. HMR-1	Bacteria; Proteobacteria; Betaproteobacteria; Burkholderiales; Burkholderiaceae; Cupriavidus
ANKP01000145.1	28	1834	3048	0	EKZ97853.1	D769_18084	GCA_000256585.3	bacteriophage gp31 protein	DUF3396	Cupriavidus sp. HMR-1	Bacteria; Proteobacteria; Betaproteobacteria; Burkholderiales; Burkholderiaceae; Cupriavidus
ANKP01000145.1	28	3057	3620	1	EKZ97854.1	D769_18089	GCA_000256585.3	VRR-NUC domain-containing protein	VRR_NUC	Cupriavidus sp. HMR-1	Bacteria; Proteobacteria; Betaproteobacteria; Burkholderiales; Burkholderiaceae; Cupriavidus
ANKP01000145.1	28	3806	4333	0	EKZ97855.1	D769_18094	GCA_000256585.3	PAAR repeat-containing protein	PAAR_motif	Cupriavidus sp. HMR-1	Bacteria; Proteobacteria; Betaproteobacteria; Burkholderiales; Burkholderiaceae; Cupriavidus
ANKP01000145.1	28	4441	5136	0	EKZ97856.1	D769_18099	GCA_000256585.3	hypothetical protein	SRAP	Cupriavidus sp. HMR-1	Bacteria; Proteobacteria; Betaproteobacteria; Burkholderiales; Burkholderiaceae; Cupriavidus
ANKP01000145.1	28	5182	7110	0	EKZ97857.1	D769_18104	GCA_000256585.3	RNA-directed DNA polymerase	RVT_1+Trypsin_2	Cupriavidus sp. HMR-1	Bacteria; Proteobacteria; Betaproteobacteria; Burkholderiales; Burkholderiaceae; Cupriavidus
KB849544.1	29	582398	583033	0	ENV32601.1	F960_03106	GCA_000256585.3	hypothetical protein		Acinetobacter gerneri DSM 14967 = CIP 107464 = MTCC 9824	Bacteria; Proteobacteria; Gammaproteobacteria; Pseudomonadales; Moraxellaceae; Acinetobacter
KB849544.1	29	583102	583551	0	ENV32602.1	F960_03107	GCA_000256585.3	hypothetical protein	DUF2345	Acinetobacter gerneri DSM 14967 = CIP 107464 = MTCC 9824	Bacteria; Proteobacteria; Gammaproteobacteria; Pseudomonadales; Moraxellaceae; Acinetobacter
KB849544.1	29	583564	583725	0	ENV32603.1	F960_03108	GCA_000256585.3	hypothetical protein		Acinetobacter gerneri DSM 14967 = CIP 107464 = MTCC 9824	Bacteria; Proteobacteria; Gammaproteobacteria; Pseudomonadales; Moraxellaceae; Acinetobacter
KB849544.1	29	583737	584867	1	ENV32604.1	F960_03109	GCA_000256585.3	hypothetical protein	VRR_NUC	Acinetobacter gerneri DSM 14967 = CIP 107464 = MTCC 9824	Bacteria; Proteobacteria; Gammaproteobacteria; Pseudomonadales; Moraxellaceae; Acinetobacter
KB849544.1	29	584910	585572	0	ENV32605.1	F960_03110	GCA_000256585.3	hypothetical protein	SPATA9+DUF3396	Acinetobacter gerneri DSM 14967 = CIP 107464 = MTCC 9824	Bacteria; Proteobacteria; Gammaproteobacteria; Pseudomonadales; Moraxellaceae; Acinetobacter
KB849544.1	29	585545	586234	0	ENV32606.1	F960_03111	GCA_000256585.3	hypothetical protein	DUF3396	Acinetobacter gerneri DSM 14967 = CIP 107464 = MTCC 9824	Bacteria; Proteobacteria; Gammaproteobacteria; Pseudomonadales; Moraxellaceae; Acinetobacter
KB849544.1	29	586701	587555	0	ENV32607.1	F960_03114	GCA_000256585.3	hypothetical protein	Pkinase	Acinetobacter gerneri DSM 14967 = CIP 107464 = MTCC 9824	Bacteria; Proteobacteria; Gammaproteobacteria; Pseudomonadales; Moraxellaceae; Acinetobacter
ASZB01000009.1	30	26918	27184	0	ERK11931.1	L580_4202	GCA_000160075.2	hypothetical protein	SP	Serratia fonticola AU-P3(3)	Bacteria; Proteobacteria; Gammaproteobacteria; Enterobacterales; Yersiniaceae; Serratia
ASZB01000009.1	30	27197	27955	0	ERK11932.1	L580_4203	GCA_000160075.2	putative membrane protein	TM+DUF4400	Serratia fonticola AU-P3(3)	Bacteria; Proteobacteria; Gammaproteobacteria; Enterobacterales; Yersiniaceae; Serratia
ASZB01000009.1	30	28262	30424	0	ERK11933.1	L580_4204	GCA_000160075.2	VgrG protein	Phage_GPD+Phage_base_V	Serratia fonticola AU-P3(3)	Bacteria; Proteobacteria; Gammaproteobacteria; Enterobacterales; Yersiniaceae; Serratia
ASZB01000009.1	30	30426	31772	1	ERK11934.1	L580_4205	GCA_000160075.2	hypothetical protein	VRR_NUC+TM+TM	Serratia fonticola AU-P3(3)	Bacteria; Proteobacteria; Gammaproteobacteria; Enterobacterales; Yersiniaceae; Serratia
ASZB01000009.1	30	31789	32931	0	ERK11935.1	L580_4206	GCA_000160075.2	hypothetical protein	DUF3396	Serratia fonticola AU-P3(3)	Bacteria; Proteobacteria; Gammaproteobacteria; Enterobacterales; Yersiniaceae; Serratia
ASZB01000009.1	30	32928	33197	0	ERK11936.1	L580_4207	GCA_000160075.2	hypothetical protein	PAAR_motif	Serratia fonticola AU-P3(3)	Bacteria; Proteobacteria; Gammaproteobacteria; Enterobacterales; Yersiniaceae; Serratia
ASZB01000009.1	30	34684	34983	0	ERK11937.1	L580_4208	GCA_000160075.2	Mobile element protein	zf-IS66	Serratia fonticola AU-P3(3)	Bacteria; Proteobacteria; Gammaproteobacteria; Enterobacterales; Yersiniaceae; Serratia
ASZB01000011.1	31	124858	126174	0	ERK10984.1	L580_0844	GCA_000160075.2	Phosphate regulon sensor protein PhoR (SphS)	PhoR+PAS+HisKA+HATPase_c	Serratia fonticola AU-P3(3)	Bacteria; Proteobacteria; Gammaproteobacteria; Enterobacterales; Yersiniaceae; Serratia
ASZB01000011.1	31	126199	126888	0	ERK10985.1	L580_0845	GCA_000160075.2	Phosphate regulon transcriptional regulatory protein PhoB (SphR)	Response_reg+Trans_reg_C	Serratia fonticola AU-P3(3)	Bacteria; Proteobacteria; Gammaproteobacteria; Enterobacterales; Yersiniaceae; Serratia
ASZB01000011.1	31	127250	129415	0	ERK10986.1	L580_0846	GCA_000160075.2	VgrG protein	Phage_GPD+Phage_base_V	Serratia fonticola AU-P3(3)	Bacteria; Proteobacteria; Gammaproteobacteria; Enterobacterales; Yersiniaceae; Serratia
ASZB01000011.1	31	129471	130757	1	ERK10987.1	L580_0847	GCA_000160075.2	hypothetical protein	VRR_NUC+TM+TM	Serratia fonticola AU-P3(3)	Bacteria; Proteobacteria; Gammaproteobacteria; Enterobacterales; Yersiniaceae; Serratia
ASZB01000011.1	31	130774	131928	0	ERK10988.1	L580_0848	GCA_000160075.2	hypothetical protein	DUF3396	Serratia fonticola AU-P3(3)	Bacteria; Proteobacteria; Gammaproteobacteria; Enterobacterales; Yersiniaceae; Serratia
ASZB01000011.1	31	131925	132194	0	ERK10989.1	L580_0849	GCA_000160075.2	hypothetical protein	PAAR_motif	Serratia fonticola AU-P3(3)	Bacteria; Proteobacteria; Gammaproteobacteria; Enterobacterales; Yersiniaceae; Serratia
ASZB01000011.1	31	132347	133576	0	ERK10990.1	L580_0850	GCA_000160075.2	Exonuclease SbcD	Metallophos+SbcD_C	Serratia fonticola AU-P3(3)	Bacteria; Proteobacteria; Gammaproteobacteria; Enterobacterales; Yersiniaceae; Serratia
KE340354.1	32	97506	98264	0	EPF71000.1	F945_02763	GCA_000160075.2	hypothetical protein	HTH_IclR+IclR	Acinetobacter rudis CIP 110305	Bacteria; Proteobacteria; Gammaproteobacteria; Moraxellales; Moraxellaceae; Acinetobacter
KE340354.1	32	98521	99279	0	EPF71001.1	F945_02764	GCA_000160075.2	hypothetical protein	TM+SIMPL	Acinetobacter rudis CIP 110305	Bacteria; Proteobacteria; Gammaproteobacteria; Moraxellales; Moraxellaceae; Acinetobacter
KE340354.1	32	99537	100829	0	EPF71002.1	F945_02765	GCA_000160075.2	hypothetical protein	DUF3396	Acinetobacter rudis CIP 110305	Bacteria; Proteobacteria; Gammaproteobacteria; Moraxellales; Moraxellaceae; Acinetobacter
KE340354.1	32	100842	101849	1	EPF71003.1	F945_02766	GCA_000160075.2	hypothetical protein		Acinetobacter rudis CIP 110305	Bacteria; Proteobacteria; Gammaproteobacteria; Moraxellales; Moraxellaceae; Acinetobacter
KE340354.1	32	101864	102394	0	EPF71004.1	F945_02767	GCA_000160075.2	hypothetical protein	PAAR_motif	Acinetobacter rudis CIP 110305	Bacteria; Proteobacteria; Gammaproteobacteria; Moraxellales; Moraxellaceae; Acinetobacter
KE340354.1	32	102694	103608	0	EPF71005.1	F945_02768	GCA_000160075.2	HTH-type transcriptional regulator CatM	HTH_1+LysR_substrate	Acinetobacter rudis CIP 110305	Bacteria; Proteobacteria; Gammaproteobacteria; Moraxellales; Moraxellaceae; Acinetobacter
KE340354.1	32	103741	104850	0	EPF71006.1	F945_02769	GCA_000160075.2	muconate cycloisomerase 1	MR_MLE_N+MR_MLE_C	Acinetobacter rudis CIP 110305	Bacteria; Proteobacteria; Gammaproteobacteria; Moraxellales; Moraxellaceae; Acinetobacter
KI973139.1	33	769048	769323	0	EUL80264.1	P833_00776	GCA_000238895.2	hypothetical protein	Phage_GPD	Enterobacter hormaechei	Bacteria; Proteobacteria; Gammaproteobacteria; Enterobacterales; Enterobacteriaceae; Enterobacter; Enterobacter cloacae complex
KI973139.1	33	769328	769852	0	EUL80265.1	P833_00777	GCA_000238895.2	type VI secretion lipoprotein	SP+T6SS-SciN	Enterobacter hormaechei	Bacteria; Proteobacteria; Gammaproteobacteria; Enterobacterales; Enterobacteriaceae; Enterobacter; Enterobacter cloacae complex
KI973139.1	33	770174	771409	0	EUL80266.1	P833_00778	GCA_000238895.2	hypothetical protein	DUF3396	Enterobacter hormaechei	Bacteria; Proteobacteria; Gammaproteobacteria; Enterobacterales; Enterobacteriaceae; Enterobacter; Enterobacter cloacae complex
KI973139.1	33	771413	772513	1	EUL80267.1	P833_00779	GCA_000238895.2	hypothetical protein		Enterobacter hormaechei	Bacteria; Proteobacteria; Gammaproteobacteria; Enterobacterales; Enterobacteriaceae; Enterobacter; Enterobacter cloacae complex
KI973139.1	33	772914	773231	0	EUL80268.1	P833_00780	GCA_000238895.2	hypothetical protein	Phage_GPD	Enterobacter hormaechei	Bacteria; Proteobacteria; Gammaproteobacteria; Enterobacterales; Enterobacteriaceae; Enterobacter; Enterobacter cloacae complex
KI973139.1	33	773367	773958	0	EUL77739.1	P833_00781	GCA_000238895.2	hypothetical protein	Phage_GPD	Enterobacter hormaechei	Bacteria; Proteobacteria; Gammaproteobacteria; Enterobacterales; Enterobacteriaceae; Enterobacter; Enterobacter cloacae complex
KI973139.1	33	773963	774190	0	EUL77740.1	P833_00782	GCA_000238895.2	hypothetical protein	T6SS-SciN	Enterobacter hormaechei	Bacteria; Proteobacteria; Gammaproteobacteria; Enterobacterales; Enterobacteriaceae; Enterobacter; Enterobacter cloacae complex
BJNI01000018.1	34	78525	79502	0	GEC32019.1	EFR01_21900	GCA_003112435.1	AraC family transcriptional regulator	AraC_binding_2+HTH_18	Sinorhizobium fredii	Bacteria; Proteobacteria; Alphaproteobacteria; Hyphomicrobiales; Rhizobiaceae; Sinorhizobium/Ensifer group; Sinorhizobium
BJNI01000018.1	34	79524	80096	0	GEC32020.1	EFR01_21910	GCA_003112435.1	hypothetical protein	Cupin_2	Sinorhizobium fredii	Bacteria; Proteobacteria; Alphaproteobacteria; Hyphomicrobiales; Rhizobiaceae; Sinorhizobium/Ensifer group; Sinorhizobium
BJNI01000018.1	34	80223	80723	0	GEC32021.1	EFR01_21920	GCA_003112435.1	hypothetical protein		Sinorhizobium fredii	Bacteria; Proteobacteria; Alphaproteobacteria; Hyphomicrobiales; Rhizobiaceae; Sinorhizobium/Ensifer group; Sinorhizobium
BJNI01000018.1	34	80880	81149	1	GEC32022.1	EFR01_21930	GCA_003112435.1	hypothetical protein		Sinorhizobium fredii	Bacteria; Proteobacteria; Alphaproteobacteria; Hyphomicrobiales; Rhizobiaceae; Sinorhizobium/Ensifer group; Sinorhizobium
BJNI01000018.1	34	81181	81873	0	GEC32023.1	EFR01_21940	GCA_003112435.1	hypothetical protein		Sinorhizobium fredii	Bacteria; Proteobacteria; Alphaproteobacteria; Hyphomicrobiales; Rhizobiaceae; Sinorhizobium/Ensifer group; Sinorhizobium
BJNI01000018.1	34	81764	82165	0	GEC32024.1	EFR01_21950	GCA_003112435.1	hypothetical protein	DUF3396	Sinorhizobium fredii	Bacteria; Proteobacteria; Alphaproteobacteria; Hyphomicrobiales; Rhizobiaceae; Sinorhizobium/Ensifer group; Sinorhizobium
BJNI01000018.1	34	82194	82490	0	GEC32025.1	EFR01_21960	GCA_003112435.1	hypothetical protein	TusA	Sinorhizobium fredii	Bacteria; Proteobacteria; Alphaproteobacteria; Hyphomicrobiales; Rhizobiaceae; Sinorhizobium/Ensifer group; Sinorhizobium
DADBIR010000087.1	35	1	862	1	HAV5944070.1	JI228_17325	GCA_003454835.1	nuclease	TM+TM	Acinetobacter baumannii	Bacteria; Proteobacteria; Gammaproteobacteria; Pseudomonadales; Moraxellaceae; Acinetobacter; Acinetobacter calcoaceticus/baumannii complex
DADBIR010000087.1	35	881	2173	0	HAV5944071.1	JI228_17330	GCA_003454835.1	DUF3396 domain-containing protein	DUF3396	Acinetobacter baumannii	Bacteria; Proteobacteria; Gammaproteobacteria; Pseudomonadales; Moraxellaceae; Acinetobacter; Acinetobacter calcoaceticus/baumannii complex
DADBIR010000087.1	35	3058	7950	0	HAV5944072.1	JI228_17335	GCA_003454835.1	hypothetical protein	NERD+AAA_11+AAA_12	Acinetobacter baumannii	Bacteria; Proteobacteria; Gammaproteobacteria; Pseudomonadales; Moraxellaceae; Acinetobacter; Acinetobacter calcoaceticus/baumannii complex
DADBIR010000087.1	35	7950	9296	0	HAV5944073.1	JI228_17340	GCA_003454835.1	hypothetical protein		Acinetobacter baumannii	Bacteria; Proteobacteria; Gammaproteobacteria; Pseudomonadales; Moraxellaceae; Acinetobacter; Acinetobacter calcoaceticus/baumannii complex
DMTA01000433.1	36	12529	12879	0	HAP27365.1	DCR74_17445	GCA_003454835.1	carboxymuconolactone decarboxylase family protein	CMD	Achromobacter sp.	Bacteria; Proteobacteria; Betaproteobacteria; Burkholderiales; Alcaligenaceae; Achromobacter
DMTA01000433.1	36	12876	13865	0	HAP27366.1	DCR74_17450	GCA_003454835.1	quinone oxidoreductase	ADH_N+ADH_zinc_N	Achromobacter sp.	Bacteria; Proteobacteria; Betaproteobacteria; Burkholderiales; Alcaligenaceae; Achromobacter
DMTA01000433.1	36	14439	14945	0	HAP27367.1	DCR74_17455	GCA_003454835.1	hypothetical protein	PAAR_motif	Achromobacter sp.	Bacteria; Proteobacteria; Betaproteobacteria; Burkholderiales; Alcaligenaceae; Achromobacter
DMTA01000433.1	36	14975	15679	1	HAP27368.1	DCR74_17460	GCA_003454835.1	nuclease	VRR_NUC	Achromobacter sp.	Bacteria; Proteobacteria; Betaproteobacteria; Burkholderiales; Alcaligenaceae; Achromobacter
DMTA01000433.1	36	15676	16785	0	HAP27369.1	DCR74_17465	GCA_003454835.1	hypothetical protein	SP+DUF3396	Achromobacter sp.	Bacteria; Proteobacteria; Betaproteobacteria; Burkholderiales; Alcaligenaceae; Achromobacter
DMTA01000433.1	36	16844	18379	0	HAP27370.1	DCR74_17470	GCA_003454835.1	hypothetical protein	TPR_15+TPR_12+TPR_19+TPR_16+TPR_19	Achromobacter sp.	Bacteria; Proteobacteria; Betaproteobacteria; Burkholderiales; Alcaligenaceae; Achromobacter
DMTA01000433.1	36	18409	19473	0	HAP27371.1	DCR74_17475	GCA_003454835.1	RDD family protein	RDD	Achromobacter sp.	Bacteria; Proteobacteria; Betaproteobacteria; Burkholderiales; Alcaligenaceae; Achromobacter
DROS01000078.1	37	24	470	1	HHI94262.1	ENK04_12230	GCA_003526285.1	hypothetical protein	TM	Gammaproteobacteria bacterium	Bacteria; Proteobacteria; Gammaproteobacteria
DROS01000078.1	37	499	1506	0	HHI94263.1	ENK04_12235	GCA_003526285.1	DUF3396 domain-containing protein	DUF3396	Gammaproteobacteria bacterium	Bacteria; Proteobacteria; Gammaproteobacteria
DROS01000078.1	37	1466	2728	0	HHI94264.1	ENK04_12240	GCA_003526285.1	TIGR02270 family protein		Gammaproteobacteria bacterium	Bacteria; Proteobacteria; Gammaproteobacteria
DROS01000078.1	37	3030	4865	0	HHI94265.1	ENK04_12245	GCA_003526285.1	DNA mismatch repair endonuclease MutL	HATPase_c_3+DNA_mis_repair+MutL_C	Gammaproteobacteria bacterium	Bacteria; Proteobacteria; Gammaproteobacteria
JTGE01000124.1	38	8504	10900	0	KIA79099.1	QR66_17815	GCA_000692055.1	DEAD/DEAH box helicase	DNA_primase_S+ResIII+Helicase_C	Chromobacterium piscinae	Bacteria; Proteobacteria; Betaproteobacteria; Neisseriales; Chromobacteriaceae; Chromobacterium
JTGE01000124.1	38	10984	11532	0	KIA79100.1	QR66_17820	GCA_000692055.1	hypothetical protein		Chromobacterium piscinae	Bacteria; Proteobacteria; Betaproteobacteria; Neisseriales; Chromobacteriaceae; Chromobacterium
JTGE01000124.1	38	11764	12936	0	KIA79101.1	QR66_17825	GCA_000692055.1	hypothetical protein	DUF3396	Chromobacterium piscinae	Bacteria; Proteobacteria; Betaproteobacteria; Neisseriales; Chromobacteriaceae; Chromobacterium
JTGE01000124.1	38	12983	14197	1	KIA79102.1	QR66_17830	GCA_000692055.1	hypothetical protein	VRR_NUC+TM+TM	Chromobacterium piscinae	Bacteria; Proteobacteria; Betaproteobacteria; Neisseriales; Chromobacteriaceae; Chromobacterium
JTGE01000124.1	38	12983	14197	1	KIA79102.1	QR66_17830	GCA_000692055.1	hypothetical protein	VRR_NUC+TM+TM	Chromobacterium piscinae	Bacteria; Proteobacteria; Betaproteobacteria; Neisseriales; Chromobacteriaceae; Chromobacterium
JZSH01000001.1	39	5509	5997	0	KJF79274.1	UA45_00035	GCA_000830175.1	endoribonuclease L-PSP	SP+Ribonuc_L-PSP	Morganella morganii	Bacteria; Proteobacteria; Gammaproteobacteria; Enterobacterales; Morganellaceae; Morganella
JZSH01000001.1	39	11603	12058	0	KJF79275.1	UA45_00065	GCA_000830175.1	AsnC family transcriptional regulator	HTH_24+AsnC_trans_reg	Morganella morganii	Bacteria; Proteobacteria; Gammaproteobacteria; Enterobacterales; Morganellaceae; Morganella
JZSH01000001.1	39	12104	12424	0	KJF79276.1	UA45_00070	GCA_000830175.1	multidrug transporter	Multi_Drug_Res	Morganella morganii	Bacteria; Proteobacteria; Gammaproteobacteria; Enterobacterales; Morganellaceae; Morganella
JZSH01000001.1	39	15692	16825	1	KJF79277.1	UA45_00095	GCA_000830175.1	hypothetical protein	VRR_NUC+TM+TM	Morganella morganii	Bacteria; Proteobacteria; Gammaproteobacteria; Enterobacterales; Morganellaceae; Morganella
JZSH01000001.1	39	16789	17208	0	KJF79278.1	UA45_00100	GCA_000830175.1	hypothetical protein		Morganella morganii	Bacteria; Proteobacteria; Gammaproteobacteria; Enterobacterales; Morganellaceae; Morganella
JZSH01000001.1	39	19786	20301	0	KJF79279.1	UA45_00115	GCA_000830175.1	hypothetical protein	SP+DUF3828	Morganella morganii	Bacteria; Proteobacteria; Gammaproteobacteria; Enterobacterales; Morganellaceae; Morganella
JZSH01000001.1	39	20304	20894	0	KJF79280.1	UA45_00120	GCA_000830175.1	GDP-mannose pyrophosphatase	NUDIX	Morganella morganii	Bacteria; Proteobacteria; Gammaproteobacteria; Enterobacterales; Morganellaceae; Morganella
LFWB01000036.1	40	53	1540	1	KOO20226.1	AC068_02885	GCA_001017995.1	hypothetical protein	VRR_NUC+TM+TM	Morganella morganii	Bacteria; Proteobacteria; Gammaproteobacteria; Enterobacterales; Morganellaceae; Morganella
LFWB01000036.1	40	1556	1927	0	KOO20227.1	AC068_02890	GCA_001017995.1	hypothetical protein		Morganella morganii	Bacteria; Proteobacteria; Gammaproteobacteria; Enterobacterales; Morganellaceae; Morganella
LMNW01000013.1	41	257	1027	0	KQQ39281.1	ASF61_22195	GCA_001423125.1	hypothetical protein	TM+TM	Duganella sp. Leaf126	Bacteria; Proteobacteria; Betaproteobacteria; Burkholderiales; Oxalobacteraceae; Duganella
LMNW01000013.1	41	1127	2185	0	KQQ39282.1	ASF61_22200	GCA_001423125.1	hypothetical protein	DUF3396	Duganella sp. Leaf126	Bacteria; Proteobacteria; Betaproteobacteria; Burkholderiales; Oxalobacteraceae; Duganella
LMNW01000013.1	41	2194	2931	1	KQQ39283.1	ASF61_22205	GCA_001423125.1	nuclease	VRR_NUC	Duganella sp. Leaf126	Bacteria; Proteobacteria; Betaproteobacteria; Burkholderiales; Oxalobacteraceae; Duganella
LMNW01000013.1	41	2928	3503	0	KQQ39288.1	ASF61_22210	GCA_001423125.1	hypothetical protein	PAAR_motif+Big_1	Duganella sp. Leaf126	Bacteria; Proteobacteria; Betaproteobacteria; Burkholderiales; Oxalobacteraceae; Duganella
LMNW01000013.1	41	3942	6779	0	KQQ39284.1	ASF61_22215	GCA_001423125.1	hypothetical protein	Phage_GPD+Phage_base_V+T6SS_Vgr+DUF2345	Duganella sp. Leaf126	Bacteria; Proteobacteria; Betaproteobacteria; Burkholderiales; Oxalobacteraceae; Duganella
LMNW01000013.1	41	6795	9077	0	KQQ39285.1	ASF61_22220	GCA_001423125.1	hypothetical protein	TM+TM+DUF3274	Duganella sp. Leaf126	Bacteria; Proteobacteria; Betaproteobacteria; Burkholderiales; Oxalobacteraceae; Duganella
LOSV01000123.1	42	238	426	0	KUY71841.1	WI25_13315	GCA_001423125.1	hypothetical protein		Burkholderia cepacia	Bacteria; Proteobacteria; Betaproteobacteria; Burkholderiales; Burkholderiaceae; Burkholderia; Burkholderia cepacia complex
LOSV01000123.1	42	613	1776	1	KUY71842.1	WI25_13320	GCA_001423125.1	hypothetical protein	VRR_NUC	Burkholderia cepacia	Bacteria; Proteobacteria; Betaproteobacteria; Burkholderiales; Burkholderiaceae; Burkholderia; Burkholderia cepacia complex
LOSV01000123.1	42	1746	3023	0	KUY71843.1	WI25_13325	GCA_001423125.1	hypothetical protein	DUF3396	Burkholderia cepacia	Bacteria; Proteobacteria; Betaproteobacteria; Burkholderiales; Burkholderiaceae; Burkholderia; Burkholderia cepacia complex
LPHD01000049.1	43	257459	257752	0	KWA83977.1	WL29_21670	GCA_001423125.1	hypothetical protein		Burkholderia ubonensis	Bacteria; Proteobacteria; Betaproteobacteria; Burkholderiales; Burkholderiaceae; Burkholderia; Burkholderia cepacia complex
LPHD01000049.1	43	257896	258078	0	KWA83978.1	WL29_21675	GCA_001423125.1	hypothetical protein		Burkholderia ubonensis	Bacteria; Proteobacteria; Betaproteobacteria; Burkholderiales; Burkholderiaceae; Burkholderia; Burkholderia cepacia complex
LPHD01000049.1	43	258120	259196	0	KWA83979.1	WL29_21680	GCA_001423125.1	hypothetical protein	DUF3396	Burkholderia ubonensis	Bacteria; Proteobacteria; Betaproteobacteria; Burkholderiales; Burkholderiaceae; Burkholderia; Burkholderia cepacia complex
LPHD01000049.1	43	259207	259905	1	KWA83980.1	WL29_21685	GCA_001423125.1	nuclease	VRR_NUC	Burkholderia ubonensis	Bacteria; Proteobacteria; Betaproteobacteria; Burkholderiales; Burkholderiaceae; Burkholderia; Burkholderia cepacia complex
LPHD01000049.1	43	260802	261014	0	KWA83981.1	WL29_21690	GCA_001423125.1	hypothetical protein		Burkholderia ubonensis	Bacteria; Proteobacteria; Betaproteobacteria; Burkholderiales; Burkholderiaceae; Burkholderia; Burkholderia cepacia complex
LPHD01000049.1	43	261052	261324	0	KWA83982.1	WL29_21695	GCA_001423125.1	hypothetical protein		Burkholderia ubonensis	Bacteria; Proteobacteria; Betaproteobacteria; Burkholderiales; Burkholderiaceae; Burkholderia; Burkholderia cepacia complex
LPHD01000049.1	43	261487	262614	0	KWA83983.1	WL29_21700	GCA_001423125.1	hypothetical protein	AAA_16	Burkholderia ubonensis	Bacteria; Proteobacteria; Betaproteobacteria; Burkholderiales; Burkholderiaceae; Burkholderia; Burkholderia cepacia complex
LPHQ01000051.1	44	8643	9899	0	KWB82958.1	WL42_07300	GCA_001423125.1	hypothetical protein	DotU+OmpA	Burkholderia ubonensis	Bacteria; Proteobacteria; Betaproteobacteria; Burkholderiales; Burkholderiaceae; Burkholderia; Burkholderia cepacia complex
LPHQ01000051.1	44	9934	10185	0	KWB82943.1	WL42_07305	GCA_001423125.1	hypothetical protein	PAAR_motif	Burkholderia ubonensis	Bacteria; Proteobacteria; Betaproteobacteria; Burkholderiales; Burkholderiaceae; Burkholderia; Burkholderia cepacia complex
LPHQ01000051.1	44	10269	11522	0	KWB82944.1	WL42_07310	GCA_001423125.1	hypothetical protein	DUF3396	Burkholderia ubonensis	Bacteria; Proteobacteria; Betaproteobacteria; Burkholderiales; Burkholderiaceae; Burkholderia; Burkholderia cepacia complex
LPHQ01000051.1	44	11545	12234	1	KWB82945.1	WL42_07315	GCA_001423125.1	hypothetical protein		Burkholderia ubonensis	Bacteria; Proteobacteria; Betaproteobacteria; Burkholderiales; Burkholderiaceae; Burkholderia; Burkholderia cepacia complex
LPHQ01000051.1	44	15162	16508	0	KWB82946.1	WL42_07325	GCA_001423125.1	type VI secretion protein	T6SS_VasE	Burkholderia ubonensis	Bacteria; Proteobacteria; Betaproteobacteria; Burkholderiales; Burkholderiaceae; Burkholderia; Burkholderia cepacia complex
LPHQ01000051.1	44	16540	17043	0	KWB82947.1	WL42_07330	GCA_001423125.1	hypothetical protein	SP+T6SS-SciN	Burkholderia ubonensis	Bacteria; Proteobacteria; Betaproteobacteria; Burkholderiales; Burkholderiaceae; Burkholderia; Burkholderia cepacia complex
LPHQ01000051.1	44	17117	17596	0	KWB82948.1	WL42_07335	GCA_001423125.1	hypothetical protein	T6SS_HCP	Burkholderia ubonensis	Bacteria; Proteobacteria; Betaproteobacteria; Burkholderiales; Burkholderiaceae; Burkholderia; Burkholderia cepacia complex
JELZ01001811.1	45	1197	1898	0	KYF73143.1	BE11_43650	GCA_001580845.1	hypothetical protein		Sorangium cellulosum	Bacteria; Proteobacteria; Deltaproteobacteria; Myxococcales; Sorangiineae; Polyangiaceae; Sorangium
JELZ01001811.1	45	2128	2505	0	KYF73149.1	BE11_43655	GCA_001580845.1	DNA mismatch repair protein MutT	NUDIX	Sorangium cellulosum	Bacteria; Proteobacteria; Deltaproteobacteria; Myxococcales; Sorangiineae; Polyangiaceae; Sorangium
JELZ01001811.1	45	2722	3714	0	KYF73144.1	BE11_43660	GCA_001580845.1	hypothetical protein	DUF3396	Sorangium cellulosum	Bacteria; Proteobacteria; Deltaproteobacteria; Myxococcales; Sorangiineae; Polyangiaceae; Sorangium
JELZ01001811.1	45	3714	5924	1	KYF73145.1	BE11_43665	GCA_001580845.1	hypothetical protein	Phage_GPD+Phage_base_V+VRR_NUC	Sorangium cellulosum	Bacteria; Proteobacteria; Deltaproteobacteria; Myxococcales; Sorangiineae; Polyangiaceae; Sorangium
JELZ01001811.1	45	5964	6395	0	KYF73146.1	BE11_43670	GCA_001580845.1	hypothetical protein	Phage_GPD	Sorangium cellulosum	Bacteria; Proteobacteria; Deltaproteobacteria; Myxococcales; Sorangiineae; Polyangiaceae; Sorangium
JELZ01001811.1	45	6392	7168	0	KYF73147.1	BE11_43675	GCA_001580845.1	hypothetical protein	PP2C_2	Sorangium cellulosum	Bacteria; Proteobacteria; Deltaproteobacteria; Myxococcales; Sorangiineae; Polyangiaceae; Sorangium
JELZ01001811.1	45	7671	9248	0	KYF73148.1	BE11_43680	GCA_001580845.1	hypothetical protein	SP	Sorangium cellulosum	Bacteria; Proteobacteria; Deltaproteobacteria; Myxococcales; Sorangiineae; Polyangiaceae; Sorangium
JEMB01000851.1	46	881	1369	0	KYF93038.1	BE17_08080	GCA_001580845.1	hypothetical protein		Sorangium cellulosum	Bacteria; Proteobacteria; Deltaproteobacteria; Myxococcales; Sorangiineae; Polyangiaceae; Sorangium
JEMB01000851.1	46	1452	2066	0	KYF93039.1	BE17_08085	GCA_001580845.1	hypothetical protein		Sorangium cellulosum	Bacteria; Proteobacteria; Deltaproteobacteria; Myxococcales; Sorangiineae; Polyangiaceae; Sorangium
JEMB01000851.1	46	2100	2969	0	KYF93040.1	BE17_08090	GCA_001580845.1	hypothetical protein	SP+DUF3396	Sorangium cellulosum	Bacteria; Proteobacteria; Deltaproteobacteria; Myxococcales; Sorangiineae; Polyangiaceae; Sorangium
JEMB01000851.1	46	3064	3753	1	KYF93041.1	BE17_08095	GCA_001580845.1	hypothetical protein	VRR_NUC	Sorangium cellulosum	Bacteria; Proteobacteria; Deltaproteobacteria; Myxococcales; Sorangiineae; Polyangiaceae; Sorangium
JACHHY010000011.1	47	5292	5603	0	MBB5018716.1	HNQ59_002009	GCA_002704325.1	rhodanese-related sulfurtransferase	Rhodanese	Chitinivorax tropicus	Bacteria; Proteobacteria; Betaproteobacteria; Chitinivorax
JACHHY010000011.1	47	5852	8536	0	MBB5018717.1	HNQ59_002010	GCA_002704325.1	outer membrane receptor protein involved in Fe transport	SP+Plug+TonB_dep_Rec	Chitinivorax tropicus	Bacteria; Proteobacteria; Betaproteobacteria; Chitinivorax
JACHHY010000011.1	47	8714	9799	0	MBB5018718.1	HNQ59_002011	GCA_002704325.1	hypothetical protein	DUF3396	Chitinivorax tropicus	Bacteria; Proteobacteria; Betaproteobacteria; Chitinivorax
JACHHY010000011.1	47	9811	10401	1	MBB5018719.1	HNQ59_002012	GCA_002704325.1	hypothetical protein	VRR_NUC	Chitinivorax tropicus	Bacteria; Proteobacteria; Betaproteobacteria; Chitinivorax
JACHHY010000011.1	47	10350	10523	0	MBB5018720.1	HNQ59_002013	GCA_002704325.1	hypothetical protein		Chitinivorax tropicus	Bacteria; Proteobacteria; Betaproteobacteria; Chitinivorax
JACHHY010000011.1	47	10520	11104	0	MBB5018721.1	HNQ59_002014	GCA_002704325.1	putative Zn-binding protein involved in type VI secretion	PAAR_motif	Chitinivorax tropicus	Bacteria; Proteobacteria; Betaproteobacteria; Chitinivorax
JACHHY010000011.1	47	12812	13324	0	MBB5018722.1	HNQ59_002015	GCA_002704325.1	hypothetical protein		Chitinivorax tropicus	Bacteria; Proteobacteria; Betaproteobacteria; Chitinivorax
JACIFI010000002.1	48	242691	244157	0	MBB4129864.1	GGR62_000608	GCA_002704325.1	CubicO group peptidase (beta-lactamase class C family)	Beta-lactamase	Xanthomonas campestris	Bacteria; Proteobacteria; Gammaproteobacteria; Xanthomonadales; Xanthomonadaceae; Xanthomonas
JACIFI010000002.1	48	244145	244375	0	MBB4129865.1	GGR62_000609	GCA_002704325.1	hypothetical protein		Xanthomonas campestris	Bacteria; Proteobacteria; Gammaproteobacteria; Xanthomonadales; Xanthomonadaceae; Xanthomonas
JACIFI010000002.1	48	244723	245580	0	MBB4129866.1	GGR62_000610	GCA_002704325.1	hypothetical protein		Xanthomonas campestris	Bacteria; Proteobacteria; Gammaproteobacteria; Xanthomonadales; Xanthomonadaceae; Xanthomonas
JACIFI010000002.1	48	246440	247063	1	MBB4129867.1	GGR62_000611	GCA_002704325.1	hypothetical protein		Xanthomonas campestris	Bacteria; Proteobacteria; Gammaproteobacteria; Xanthomonadales; Xanthomonadaceae; Xanthomonas
JACIFI010000002.1	48	247073	248056	0	MBB4129868.1	GGR62_000612	GCA_002704325.1	hypothetical protein	DUF3396	Xanthomonas campestris	Bacteria; Proteobacteria; Gammaproteobacteria; Xanthomonadales; Xanthomonadaceae; Xanthomonas
JACIFI010000002.1	48	248193	248459	0	MBB4129869.1	GGR62_000613	GCA_002704325.1	hypothetical protein		Xanthomonas campestris	Bacteria; Proteobacteria; Gammaproteobacteria; Xanthomonadales; Xanthomonadaceae; Xanthomonas
JACIFI010000002.1	48	249143	249730	0	MBB4129870.1	GGR62_000614	GCA_002704325.1	AraC-like DNA-binding protein	HTH_18	Xanthomonas campestris	Bacteria; Proteobacteria; Gammaproteobacteria; Xanthomonadales; Xanthomonadaceae; Xanthomonas
JACXBF010000010.1	49	17148	18359	0	MBD2798908.1	ID854_00120	GCA_014763825.1	DUF3396 domain-containing protein	DUF3396	Xenorhabdus sp. M	Bacteria; Proteobacteria; Gammaproteobacteria; Enterobacterales; Morganellaceae; Xenorhabdus; unclassified Xenorhabdus
JACXBF010000010.1	49	18343	18612	0	MBD2798909.1	ID854_00125	GCA_014763825.1	PAAR domain-containing protein	PAAR_motif	Xenorhabdus sp. M	Bacteria; Proteobacteria; Gammaproteobacteria; Enterobacterales; Morganellaceae; Xenorhabdus; unclassified Xenorhabdus
JACXBF010000010.1	49	18749	19063	0	MBD2798910.1	ID854_00130	GCA_014763825.1	hypothetical protein	SP+TM	Xenorhabdus sp. M	Bacteria; Proteobacteria; Gammaproteobacteria; Enterobacterales; Morganellaceae; Xenorhabdus; unclassified Xenorhabdus
JACXBF010000010.1	49	19253	19759	1	MBD2798911.1	ID854_00135	GCA_014763825.1	VRR-NUC domain-containing protein	SP+VRR_NUC	Xenorhabdus sp. M	Bacteria; Proteobacteria; Gammaproteobacteria; Enterobacterales; Morganellaceae; Xenorhabdus; unclassified Xenorhabdus
JACXBF010000010.1	49	19768	19938	0	MBD2798912.1	ID854_00140	GCA_014763825.1	hypothetical protein		Xenorhabdus sp. M	Bacteria; Proteobacteria; Gammaproteobacteria; Enterobacterales; Morganellaceae; Xenorhabdus; unclassified Xenorhabdus
JACXBF010000010.1	49	19938	20495	0	MBD2798913.1	ID854_00145	GCA_014763825.1	hypothetical protein	TM+TM	Xenorhabdus sp. M	Bacteria; Proteobacteria; Gammaproteobacteria; Enterobacterales; Morganellaceae; Xenorhabdus; unclassified Xenorhabdus
JACXBF010000010.1	49	20511	21719	0	MBD2798914.1	ID854_00150	GCA_014763825.1	DUF3396 domain-containing protein	DUF3396	Xenorhabdus sp. M	Bacteria; Proteobacteria; Gammaproteobacteria; Enterobacterales; Morganellaceae; Xenorhabdus; unclassified Xenorhabdus
JACXBI010000036.1	50	42645	43901	0	MBD2792531.1	ID857_09615	GCA_014763825.1	VWA domain-containing protein	TerD+vWA-TerF-like	Xenorhabdus sp. CUL	Bacteria; Proteobacteria; Gammaproteobacteria; Enterobacterales; Morganellaceae; Xenorhabdus; unclassified Xenorhabdus
JACXBI010000036.1	50	44075	45079	0	MBD2792532.1	ID857_09620	GCA_014763825.1	DUF3396 domain-containing protein	DUF3396	Xenorhabdus sp. CUL	Bacteria; Proteobacteria; Gammaproteobacteria; Enterobacterales; Morganellaceae; Xenorhabdus; unclassified Xenorhabdus
JACXBI010000036.1	50	45329	46543	0	MBD2792533.1	ID857_09625	GCA_014763825.1	DUF3396 domain-containing protein	DUF3396	Xenorhabdus sp. CUL	Bacteria; Proteobacteria; Gammaproteobacteria; Enterobacterales; Morganellaceae; Xenorhabdus; unclassified Xenorhabdus
JACXBI010000036.1	50	46562	47929	1	MBD2792534.1	ID857_09630	GCA_014763825.1	VRR-NUC domain-containing protein	VRR_NUC	Xenorhabdus sp. CUL	Bacteria; Proteobacteria; Gammaproteobacteria; Enterobacterales; Morganellaceae; Xenorhabdus; unclassified Xenorhabdus
JACXBI010000036.1	50	46562	47929	1	MBD2792534.1	ID857_09630	GCA_014763825.1	VRR-NUC domain-containing protein	VRR_NUC	Xenorhabdus sp. CUL	Bacteria; Proteobacteria; Gammaproteobacteria; Enterobacterales; Morganellaceae; Xenorhabdus; unclassified Xenorhabdus
JACXBI010000036.1	50	47931	50501	0	MBD2792535.1	ID857_09635	GCA_014763825.1	type VI secretion system tip protein VgrG	Phage_GPD+Phage_base_V+T6SS_Vgr+DUF2345	Xenorhabdus sp. CUL	Bacteria; Proteobacteria; Gammaproteobacteria; Enterobacterales; Morganellaceae; Xenorhabdus; unclassified Xenorhabdus
JACXBI010000036.1	50	50990	51226	0	MBD2792536.1	ID857_09640	GCA_014763825.1	hypothetical protein		Xenorhabdus sp. CUL	Bacteria; Proteobacteria; Gammaproteobacteria; Enterobacterales; Morganellaceae; Xenorhabdus; unclassified Xenorhabdus
JACXBI010000036.1	50	51490	51792	0	MBD2792537.1	ID857_09645	GCA_014763825.1	hypothetical protein		Xenorhabdus sp. CUL	Bacteria; Proteobacteria; Gammaproteobacteria; Enterobacterales; Morganellaceae; Xenorhabdus; unclassified Xenorhabdus
JACXBK010000041.1	51	41453	41845	0	MBD2780846.1	ID859_09920	GCA_014763825.1	hypothetical protein		Xenorhabdus sp. 38	Bacteria; Proteobacteria; Gammaproteobacteria; Enterobacterales; Morganellaceae; Xenorhabdus; unclassified Xenorhabdus
JACXBK010000041.1	51	41896	42165	0	MBD2780847.1	ID859_09925	GCA_014763825.1	PAAR domain-containing protein	PAAR_motif	Xenorhabdus sp. 38	Bacteria; Proteobacteria; Gammaproteobacteria; Enterobacterales; Morganellaceae; Xenorhabdus; unclassified Xenorhabdus
JACXBK010000041.1	51	42149	43357	0	MBD2780848.1	ID859_09930	GCA_014763825.1	DUF3396 domain-containing protein	DUF3396	Xenorhabdus sp. 38	Bacteria; Proteobacteria; Gammaproteobacteria; Enterobacterales; Morganellaceae; Xenorhabdus; unclassified Xenorhabdus
JACXBK010000041.1	51	43376	44941	1	MBD2780849.1	ID859_09935	GCA_014763825.1	VRR-NUC domain-containing protein	VRR_NUC+TM+TM	Xenorhabdus sp. 38	Bacteria; Proteobacteria; Gammaproteobacteria; Enterobacterales; Morganellaceae; Xenorhabdus; unclassified Xenorhabdus
JACXBK010000041.1	51	43376	44941	1	MBD2780849.1	ID859_09935	GCA_014763825.1	VRR-NUC domain-containing protein	VRR_NUC+TM+TM	Xenorhabdus sp. 38	Bacteria; Proteobacteria; Gammaproteobacteria; Enterobacterales; Morganellaceae; Xenorhabdus; unclassified Xenorhabdus
JACXBK010000041.1	51	44944	47115	0	MBD2780850.1	ID859_09940	GCA_014763825.1	type VI secretion system tip protein VgrG	Phage_GPD+Phage_base_V+Gp5_C	Xenorhabdus sp. 38	Bacteria; Proteobacteria; Gammaproteobacteria; Enterobacterales; Morganellaceae; Xenorhabdus; unclassified Xenorhabdus
JACXBK010000041.1	51	47134	48936	0	MBD2780851.1	ID859_09945	GCA_014763825.1	type VI secretion system baseplate subunit TssF	T6SS_TssF	Xenorhabdus sp. 38	Bacteria; Proteobacteria; Gammaproteobacteria; Enterobacterales; Morganellaceae; Xenorhabdus; unclassified Xenorhabdus
JACXBK010000041.1	51	49687	49968	0	MBD2780852.1	ID859_09955	GCA_014763825.1	recombinase family protein	Resolvase+CENP-B_N	Xenorhabdus sp. 38	Bacteria; Proteobacteria; Gammaproteobacteria; Enterobacterales; Morganellaceae; Xenorhabdus; unclassified Xenorhabdus
JACRDA010000278.1	52	770	1174	0	MBI4954574.1	HY908_21295	GCA_002716625.1	hypothetical protein		Myxococcales bacterium	Bacteria; Proteobacteria; Deltaproteobacteria; Myxococcales
JACRDA010000278.1	52	1258	1710	0	MBI4954575.1	HY908_21300	GCA_002716625.1	hypothetical protein		Myxococcales bacterium	Bacteria; Proteobacteria; Deltaproteobacteria; Myxococcales
JACRDA010000278.1	52	1707	3737	0	MBI4954576.1	HY908_21305	GCA_002716625.1	type VI secretion system tip protein VgrG	Phage_GPD+Phage_base_V	Myxococcales bacterium	Bacteria; Proteobacteria; Deltaproteobacteria; Myxococcales
JACRDA010000278.1	52	3752	4849	1	MBI4954577.1	HY908_21310	GCA_002716625.1	DUF4150 domain-containing protein	DUF4150+TM	Myxococcales bacterium	Bacteria; Proteobacteria; Deltaproteobacteria; Myxococcales
JACRDA010000278.1	52	4981	5769	0	MBI4954578.1	HY908_21315	GCA_002716625.1	DUF3396 domain-containing protein	DUF3396	Myxococcales bacterium	Bacteria; Proteobacteria; Deltaproteobacteria; Myxococcales
JACRDA010000278.1	52	5783	6667	0	MBI4954579.1	HY908_21320	GCA_002716625.1	DUF3396 domain-containing protein	DUF3396	Myxococcales bacterium	Bacteria; Proteobacteria; Deltaproteobacteria; Myxococcales
JACRDA010000278.1	52	6690	7211	0	MBI4954580.1	HY908_21325	GCA_002716625.1	hypothetical protein	DUF6484+DUF2345	Myxococcales bacterium	Bacteria; Proteobacteria; Deltaproteobacteria; Myxococcales
JAEUOD010000021.1	53	15065	16306	0	MBL8410021.1	JNM15_01825	GCA_016758715.1	beta-ketoacyl-[acyl-carrier-protein] synthase family protein	ketoacyl-synt+Ketoacyl-synt_C	Dechloromonas sp.	Bacteria; Proteobacteria; Betaproteobacteria; Rhodocyclales; Azonexaceae; Dechloromonas; unclassified Dechloromonas
JAEUOD010000021.1	53	16310	16546	0	MBL8410022.1	JNM15_01830	GCA_016758715.1	acyl carrier protein	PP-binding	Dechloromonas sp.	Bacteria; Proteobacteria; Betaproteobacteria; Rhodocyclales; Azonexaceae; Dechloromonas; unclassified Dechloromonas
JAEUOD010000021.1	53	16804	19551	0	MBL8410023.1	JNM15_01835	GCA_016758715.1	type VI secretion system tip protein VgrG	Phage_GPD+Phage_base_V+T6SS_Vgr+DUF2345	Dechloromonas sp.	Bacteria; Proteobacteria; Betaproteobacteria; Rhodocyclales; Azonexaceae; Dechloromonas; unclassified Dechloromonas
JAEUOD010000021.1	53	19548	20552	1	MBL8410024.1	JNM15_01840	GCA_016758715.1	hypothetical protein	TM+TM+TM	Dechloromonas sp.	Bacteria; Proteobacteria; Betaproteobacteria; Rhodocyclales; Azonexaceae; Dechloromonas; unclassified Dechloromonas
JAEUOD010000021.1	53	19548	20552	1	MBL8410024.1	JNM15_01840	GCA_016758715.1	hypothetical protein	TM+TM+TM	Dechloromonas sp.	Bacteria; Proteobacteria; Betaproteobacteria; Rhodocyclales; Azonexaceae; Dechloromonas; unclassified Dechloromonas
JAEUOD010000021.1	53	20571	21833	0	MBL8410025.1	JNM15_01845	GCA_016758715.1	DUF3396 domain-containing protein	DUF3396	Dechloromonas sp.	Bacteria; Proteobacteria; Betaproteobacteria; Rhodocyclales; Azonexaceae; Dechloromonas; unclassified Dechloromonas
JAEUOD010000021.1	53	21868	23622	0	MBL8410026.1	JNM15_01850	GCA_016758715.1	protein-disulfide reductase DsbD	SP+DsbC+DsbD+TM+TM+Thioredoxin_7	Dechloromonas sp.	Bacteria; Proteobacteria; Betaproteobacteria; Rhodocyclales; Azonexaceae; Dechloromonas; unclassified Dechloromonas
JAEUOD010000021.1	53	23625	23942	0	MBL8410027.1	JNM15_01855	GCA_016758715.1	divalent-cation tolerance protein CutA	CutA1	Dechloromonas sp.	Bacteria; Proteobacteria; Betaproteobacteria; Rhodocyclales; Azonexaceae; Dechloromonas; unclassified Dechloromonas
RKSW01000037.1	54	20204	21310	0	MBL3828642.1	EGU81_06625	GCA_016758715.1	GGDEF domain-containing protein	TM+TM+TM+TM+TM+TM+GGDEF	Pseudomonas syringae pv. theae	Bacteria; Proteobacteria; Gammaproteobacteria; Pseudomonadales; Pseudomonadaceae; Pseudomonas; Pseudomonas syringae
RKSW01000037.1	54	21675	22988	0	MBL3828643.1	EGU81_06630	GCA_016758715.1	methyl-accepting chemotaxis protein	PAS_3+PAS_3+MCPsignal	Pseudomonas syringae pv. theae	Bacteria; Proteobacteria; Gammaproteobacteria; Pseudomonadales; Pseudomonadaceae; Pseudomonas; Pseudomonas syringae
RKSW01000037.1	54	23607	24179	0	MBL3828644.1	EGU81_06640	GCA_016758715.1	PAAR domain-containing protein	PAAR_motif	Pseudomonas syringae pv. theae	Bacteria; Proteobacteria; Gammaproteobacteria; Pseudomonadales; Pseudomonadaceae; Pseudomonas; Pseudomonas syringae
RKSW01000037.1	54	24176	24901	1	MBL3828645.1	EGU81_06645	GCA_016758715.1	VRR-NUC domain-containing protein	VRR_NUC	Pseudomonas syringae pv. theae	Bacteria; Proteobacteria; Gammaproteobacteria; Pseudomonadales; Pseudomonadaceae; Pseudomonas; Pseudomonas syringae
RKSW01000037.1	54	24911	25987	0	MBL3828646.1	EGU81_06650	GCA_016758715.1	DUF3396 domain-containing protein	DUF3396	Pseudomonas syringae pv. theae	Bacteria; Proteobacteria; Gammaproteobacteria; Pseudomonadales; Pseudomonadaceae; Pseudomonas; Pseudomonas syringae
RKSW01000037.1	54	27122	27352	0	MBL3828647.1	EGU81_06660	GCA_016758715.1	DUF1534 domain-containing protein	TM	Pseudomonas syringae pv. theae	Bacteria; Proteobacteria; Gammaproteobacteria; Pseudomonadales; Pseudomonadaceae; Pseudomonas; Pseudomonas syringae
RKSW01000037.1	54	27328	27954	0	MBL3828648.1	EGU81_06665	GCA_016758715.1	hydrolase	Isochorismatase	Pseudomonas syringae pv. theae	Bacteria; Proteobacteria; Gammaproteobacteria; Pseudomonadales; Pseudomonadaceae; Pseudomonas; Pseudomonas syringae
JAFGWT010000305.1	55	5617	7128	0	MBN2716987.1	JXX14_14140	GCA_002723205.1	hypothetical protein	SP+RCC1_2+RCC1_2	Deltaproteobacteria bacterium	Bacteria; Proteobacteria; Deltaproteobacteria
JAFGWT010000305.1	55	7129	8109	0	MBN2716988.1	JXX14_14145	GCA_002723205.1	tetratricopeptide repeat protein	SP+TPR_16+TM	Deltaproteobacteria bacterium	Bacteria; Proteobacteria; Deltaproteobacteria
JAFGWT010000305.1	55	8261	9241	0	MBN2716989.1	JXX14_14150	GCA_002723205.1	DUF3396 domain-containing protein	DUF3396	Deltaproteobacteria bacterium	Bacteria; Proteobacteria; Deltaproteobacteria
JAFGWT010000305.1	55	9238	9780	1	MBN2716990.1	JXX14_14155	GCA_002723205.1	hypothetical protein	VRR_NUC+TM	Deltaproteobacteria bacterium	Bacteria; Proteobacteria; Deltaproteobacteria
JAFGWT010000305.1	55	10710	11987	0	MBN2716991.1	JXX14_14165	GCA_002723205.1	recombinase family protein	Resolvase+Recombinase+Zn_ribbon_recom	Deltaproteobacteria bacterium	Bacteria; Proteobacteria; Deltaproteobacteria
JAFGWT010000305.1	55	12125	12796	0	MBN2716992.1	JXX14_14170	GCA_002723205.1	hypothetical protein		Deltaproteobacteria bacterium	Bacteria; Proteobacteria; Deltaproteobacteria
JAFGWT010000305.1	55	12875	13264	0	MBN2716993.1	JXX14_14175	GCA_002723205.1	type II toxin-antitoxin system death-on-curing family toxin	Fic	Deltaproteobacteria bacterium	Bacteria; Proteobacteria; Deltaproteobacteria
JAGWVB010000088.1	56	1	452	0	MBU6258841.1	KGO01_10510	GCA_002729675.1	beta-ketoacyl synthase		Burkholderiales bacterium	Bacteria; Proteobacteria; Betaproteobacteria; Burkholderiales
JAGWVB010000088.1	56	422	1483	1	MBU6258842.1	KGO01_10515	GCA_002729675.1	DUF4150 domain-containing protein	DUF4150	Burkholderiales bacterium	Bacteria; Proteobacteria; Betaproteobacteria; Burkholderiales
JAGWVB010000088.1	56	1519	2502	0	MBU6258843.1	KGO01_10520	GCA_002729675.1	DUF3396 domain-containing protein	DUF3396	Burkholderiales bacterium	Bacteria; Proteobacteria; Betaproteobacteria; Burkholderiales
JAGWVB010000088.1	56	2756	3745	0	MBU6258844.1	KGO01_10525	GCA_002729675.1	DUF3396 domain-containing protein	DUF3396	Burkholderiales bacterium	Bacteria; Proteobacteria; Betaproteobacteria; Burkholderiales
JAGWVB010000088.1	56	3829	4617	0	MBU6258845.1	KGO01_10530	GCA_002729675.1	fumarate reductase iron-sulfur subunit	Fer2_3+Fer4_8	Burkholderiales bacterium	Bacteria; Proteobacteria; Betaproteobacteria; Burkholderiales
JAGZUV010000108.1	57	3512	5224	0	MBS6831123.1	KH208_14925	GCA_002729675.1	hypothetical protein	PGAP1	Desulfovibrio sp.	Bacteria; Proteobacteria; Deltaproteobacteria; Desulfovibrionales; Desulfovibrionaceae; Desulfovibrio
JAGZUV010000108.1	57	5285	5545	0	MBS6831124.1	KH208_14930	GCA_002729675.1	PAAR domain-containing protein	PAAR_motif	Desulfovibrio sp.	Bacteria; Proteobacteria; Deltaproteobacteria; Desulfovibrionales; Desulfovibrionaceae; Desulfovibrio
JAGZUV010000108.1	57	7812	8693	0	MBS6831125.1	KH208_14940	GCA_002729675.1	DUF4123 domain-containing protein	DUF4123	Desulfovibrio sp.	Bacteria; Proteobacteria; Deltaproteobacteria; Desulfovibrionales; Desulfovibrionaceae; Desulfovibrio
JAGZUV010000108.1	57	8709	9483	1	MBS6831126.1	KH208_14945	GCA_002729675.1	VRR-NUC domain-containing protein	VRR_NUC	Desulfovibrio sp.	Bacteria; Proteobacteria; Deltaproteobacteria; Desulfovibrionales; Desulfovibrionaceae; Desulfovibrio
SPEX01000035.1	58	42033	42374	0	MPT04363.1	E2582_09070	GCA_009360655.1	hypothetical protein	PAAR_motif+PAAR_motif	Delftia sp.	Bacteria; Proteobacteria; Betaproteobacteria; Burkholderiales; Comamonadaceae; Delftia
SPEX01000035.1	58	42381	42989	0	MPT04364.1	E2582_09075	GCA_009360655.1	DUF4123 domain-containing protein	DUF4123	Delftia sp.	Bacteria; Proteobacteria; Betaproteobacteria; Burkholderiales; Comamonadaceae; Delftia
SPEX01000035.1	58	42986	43390	0	MPT04365.1	E2582_09080	GCA_009360655.1	hypothetical protein		Delftia sp.	Bacteria; Proteobacteria; Betaproteobacteria; Burkholderiales; Comamonadaceae; Delftia
SPEX01000035.1	58	43387	44142	1	MPT04366.1	E2582_09085	GCA_009360655.1	hypothetical protein		Delftia sp.	Bacteria; Proteobacteria; Betaproteobacteria; Burkholderiales; Comamonadaceae; Delftia
SPEX01000035.1	58	44181	44562	0	MPT04367.1	E2582_09090	GCA_009360655.1	hypothetical protein		Delftia sp.	Bacteria; Proteobacteria; Betaproteobacteria; Burkholderiales; Comamonadaceae; Delftia
JABLXQ010000021.1	59	112639	113940	0	NPU92824.1	HPY82_13030	GCA_001676315.1	methyltransferase domain-containing protein	Methyltransf_31+MethyTransf_Reg	Gammaproteobacteria bacterium	Bacteria; Proteobacteria; Gammaproteobacteria
JABLXQ010000021.1	59	113940	114947	0	NPU92825.1	HPY82_13035	GCA_001676315.1	DUF2169 domain-containing protein	DUF2169	Gammaproteobacteria bacterium	Bacteria; Proteobacteria; Gammaproteobacteria
JABLXQ010000021.1	59	114944	116011	0	NPU92826.1	HPY82_13040	GCA_001676315.1	hypothetical protein	ketoacyl-synt	Gammaproteobacteria bacterium	Bacteria; Proteobacteria; Gammaproteobacteria
JABLXQ010000021.1	59	116019	116936	1	NPU92827.1	HPY82_13045	GCA_001676315.1	DUF4150 domain-containing protein	DUF4150+VRR_NUC	Gammaproteobacteria bacterium	Bacteria; Proteobacteria; Gammaproteobacteria
JABLXQ010000021.1	59	116912	117868	0	NPU92828.1	HPY82_13050	GCA_001676315.1	DUF3396 domain-containing protein	DUF3396	Gammaproteobacteria bacterium	Bacteria; Proteobacteria; Gammaproteobacteria
JABLXQ010000021.1	59	117884	119287	0	NPU92829.1	HPY82_13055	GCA_001676315.1	TIGR02270 family protein	HEAT_2	Gammaproteobacteria bacterium	Bacteria; Proteobacteria; Gammaproteobacteria
JABLXQ010000021.1	59	119199	120518	0	NPU92830.1	HPY82_13060	GCA_001676315.1	amino acid permease	AA_permease_2+TM	Gammaproteobacteria bacterium	Bacteria; Proteobacteria; Gammaproteobacteria
JABWBE010000575.1	60	1	1263	0	NUQ78842.1	HUU21_35405	GCA_001676315.1	PGRS family protein		Polyangiaceae bacterium	Bacteria; Proteobacteria; Deltaproteobacteria; Myxococcales; Sorangiineae; Polyangiaceae
JABWBE010000575.1	60	1324	1650	0	NUQ78843.1	HUU21_35410	GCA_001676315.1	helix-turn-helix transcriptional regulator	HTH_3	Polyangiaceae bacterium	Bacteria; Proteobacteria; Deltaproteobacteria; Myxococcales; Sorangiineae; Polyangiaceae
JABWBE010000575.1	60	1774	4473	1	NUQ78844.1	HUU21_35415	GCA_001676315.1	type VI secretion system tip protein VgrG	Phage_GPD+Phage_base_V+TM	Polyangiaceae bacterium	Bacteria; Proteobacteria; Deltaproteobacteria; Myxococcales; Sorangiineae; Polyangiaceae
JABWBE010000575.1	60	4488	5441	0	NUQ78845.1	HUU21_35420	GCA_001676315.1	DUF3396 domain-containing protein	DUF3396	Polyangiaceae bacterium	Bacteria; Proteobacteria; Deltaproteobacteria; Myxococcales; Sorangiineae; Polyangiaceae
JABWBE010000575.1	60	5585	5881	0	NUQ78846.1	HUU21_35425	GCA_001676315.1	hypothetical protein	TM+TM+TM	Polyangiaceae bacterium	Bacteria; Proteobacteria; Deltaproteobacteria; Myxococcales; Sorangiineae; Polyangiaceae
JABWBE010000575.1	60	6140	6343	0	NUQ78847.1	HUU21_35430	GCA_001676315.1	hypothetical protein	DUF1565	Polyangiaceae bacterium	Bacteria; Proteobacteria; Deltaproteobacteria; Myxococcales; Sorangiineae; Polyangiaceae
MAZC01001264.1	61	49	597	1	ODN63993.1	BA763_00645	GCA_000507485.3	hypothetical protein	VRR_NUC	Burkholderia cenocepacia	Bacteria; Proteobacteria; Betaproteobacteria; Burkholderiales; Burkholderiaceae; Burkholderia; Burkholderia cepacia complex
MAZC01001264.1	61	602	1720	0	ODN63990.1	BA763_00650	GCA_000507485.3	hypothetical protein	DUF3396	Burkholderia cenocepacia	Bacteria; Proteobacteria; Betaproteobacteria; Burkholderiales; Burkholderiaceae; Burkholderia; Burkholderia cepacia complex
MAZC01001264.1	61	1767	2687	0	ODN63991.1	BA763_00655	GCA_000507485.3	hypothetical protein	ParBc+RepB	Burkholderia cenocepacia	Bacteria; Proteobacteria; Betaproteobacteria; Burkholderiales; Burkholderiaceae; Burkholderia; Burkholderia cepacia complex
MAZC01001264.1	61	2687	2890	0	ODN63992.1	BA763_00660	GCA_000507485.3	hypothetical protein		Burkholderia cenocepacia	Bacteria; Proteobacteria; Betaproteobacteria; Burkholderiales; Burkholderiaceae; Burkholderia; Burkholderia cepacia complex
MECP01000046.1	62	5052	5294	0	ODQ28054.1	BGV63_26360	GCA_000507485.3	hypothetical protein		Burkholderia ubonensis	Bacteria; Proteobacteria; Betaproteobacteria; Burkholderiales; Burkholderiaceae; Burkholderia; Burkholderia cepacia complex
MECP01000046.1	62	5299	6372	0	ODQ28055.1	BGV63_26365	GCA_000507485.3	hypothetical protein	DUF2169	Burkholderia ubonensis	Bacteria; Proteobacteria; Betaproteobacteria; Burkholderiales; Burkholderiaceae; Burkholderia; Burkholderia cepacia complex
MECP01000046.1	62	6369	7487	0	ODQ28056.1	BGV63_26370	GCA_000507485.3	hypothetical protein	SP+ketoacyl-synt	Burkholderia ubonensis	Bacteria; Proteobacteria; Betaproteobacteria; Burkholderiales; Burkholderiaceae; Burkholderia; Burkholderia cepacia complex
MECP01000046.1	62	7484	8536	1	ODQ28057.1	BGV63_26375	GCA_000507485.3	hypothetical protein	DUF4150+TM	Burkholderia ubonensis	Bacteria; Proteobacteria; Betaproteobacteria; Burkholderiales; Burkholderiaceae; Burkholderia; Burkholderia cepacia complex
MECP01000046.1	62	9134	9565	0	ODQ28074.1	BGV63_26380	GCA_000507485.3	hypothetical protein	DUF3396	Burkholderia ubonensis	Bacteria; Proteobacteria; Betaproteobacteria; Burkholderiales; Burkholderiaceae; Burkholderia; Burkholderia cepacia complex
MECP01000046.1	62	9665	11059	0	ODQ28058.1	BGV63_26385	GCA_000507485.3	tRNA uridine-5-carboxymethylaminomethyl(34) synthesis GTPase MnmE	TrmE_N+MnmE_helical	Burkholderia ubonensis	Bacteria; Proteobacteria; Betaproteobacteria; Burkholderiales; Burkholderiaceae; Burkholderia; Burkholderia cepacia complex
MECP01000046.1	62	11396	11818	0	ODQ28059.1	BGV63_26390	GCA_000507485.3	transcriptional regulator	HTH_3	Burkholderia ubonensis	Bacteria; Proteobacteria; Betaproteobacteria; Burkholderiales; Burkholderiaceae; Burkholderia; Burkholderia cepacia complex
NBZE01000013.1	63	240513	240746	0	OVE94285.1	B7W85_11985	GCA_002083955.1	hypothetical protein	DUF4150	Agrobacterium vitis	Bacteria; Proteobacteria; Alphaproteobacteria; Hyphomicrobiales; Rhizobiaceae; Rhizobium/Agrobacterium group; Agrobacterium
NBZE01000013.1	63	240913	241869	0	OVE94286.1	B7W85_11990	GCA_002083955.1	hypothetical protein	DUF3396	Agrobacterium vitis	Bacteria; Proteobacteria; Alphaproteobacteria; Hyphomicrobiales; Rhizobiaceae; Rhizobium/Agrobacterium group; Agrobacterium
NBZE01000013.1	63	241862	242839	0	OVE94287.1	B7W85_11995	GCA_002083955.1	hypothetical protein	DUF3396	Agrobacterium vitis	Bacteria; Proteobacteria; Alphaproteobacteria; Hyphomicrobiales; Rhizobiaceae; Rhizobium/Agrobacterium group; Agrobacterium
NBZE01000013.1	63	242852	243949	1	OVE94288.1	B7W85_12000	GCA_002083955.1	hypothetical protein	DUF4150	Agrobacterium vitis	Bacteria; Proteobacteria; Alphaproteobacteria; Hyphomicrobiales; Rhizobiaceae; Rhizobium/Agrobacterium group; Agrobacterium
NBZE01000013.1	63	244883	245899	0	OVE94289.1	B7W85_12005	GCA_002083955.1	hypothetical protein	DUF2169	Agrobacterium vitis	Bacteria; Proteobacteria; Alphaproteobacteria; Hyphomicrobiales; Rhizobiaceae; Rhizobium/Agrobacterium group; Agrobacterium
NBZE01000013.1	63	245910	246161	0	OVE94290.1	B7W85_12010	GCA_002083955.1	hypothetical protein		Agrobacterium vitis	Bacteria; Proteobacteria; Alphaproteobacteria; Hyphomicrobiales; Rhizobiaceae; Rhizobium/Agrobacterium group; Agrobacterium
NBZE01000013.1	63	246347	247393	0	OVE94291.1	B7W85_12015	GCA_002083955.1	hypothetical protein		Agrobacterium vitis	Bacteria; Proteobacteria; Alphaproteobacteria; Hyphomicrobiales; Rhizobiaceae; Rhizobium/Agrobacterium group; Agrobacterium
NVER01000989.1	64	23	418	1	PFW54756.1	COL27_32840	GCA_002191155.1	VRR-NUC domain-containing protein	VRR_NUC	Bacillus sp. AFS075960	Bacteria; Firmicutes; Bacilli; Bacillales; Bacillaceae; Bacillus
NVER01000989.1	64	433	628	0	PFW54757.1	COL27_32845	GCA_002191155.1	hypothetical protein		Bacillus sp. AFS075960	Bacteria; Firmicutes; Bacilli; Bacillales; Bacillaceae; Bacillus
LUVY01000014.1	65	60376	60933	0	PRN04125.1	A0O30_13125	GCA_000988875.2	ADP-ribose pyrophosphatase	Nudix_N_2+NUDIX	Pseudomonas sp. LLC-1	Bacteria; Proteobacteria; Gammaproteobacteria; Pseudomonadales; Pseudomonadaceae; Pseudomonas
LUVY01000014.1	65	60959	61513	0	PRN04126.1	A0O30_13130	GCA_000988875.2	hypothetical protein	SP+YkuD	Pseudomonas sp. LLC-1	Bacteria; Proteobacteria; Gammaproteobacteria; Pseudomonadales; Pseudomonadaceae; Pseudomonas
LUVY01000014.1	65	61548	62654	0	PRN04127.1	A0O30_13135	GCA_000988875.2	hypothetical protein	DUF3396	Pseudomonas sp. LLC-1	Bacteria; Proteobacteria; Gammaproteobacteria; Pseudomonadales; Pseudomonadaceae; Pseudomonas
LUVY01000014.1	65	62647	63597	1	PRN04128.1	A0O30_13140	GCA_000988875.2	hypothetical protein	VRR_NUC	Pseudomonas sp. LLC-1	Bacteria; Proteobacteria; Gammaproteobacteria; Pseudomonadales; Pseudomonadaceae; Pseudomonas
LUVY01000014.1	65	66601	67260	0	PRN04129.1	A0O30_13150	GCA_000988875.2	general secretion pathway protein GspN	SP	Pseudomonas sp. LLC-1	Bacteria; Proteobacteria; Gammaproteobacteria; Pseudomonadales; Pseudomonadaceae; Pseudomonas
LUVY01000014.1	65	67257	67643	0	PRN04130.1	A0O30_13155	GCA_000988875.2	type II secretion system protein GspM	SP	Pseudomonas sp. LLC-1	Bacteria; Proteobacteria; Gammaproteobacteria; Pseudomonadales; Pseudomonadaceae; Pseudomonas
LUVY01000014.1	65	67640	68716	0	PRN04396.1	A0O30_13160	GCA_000988875.2	type II secretion system protein GspL	T2SSL+GspL_C	Pseudomonas sp. LLC-1	Bacteria; Proteobacteria; Gammaproteobacteria; Pseudomonadales; Pseudomonadaceae; Pseudomonas
QAJF01000795.1	66	114	1682	1	PTT84671.1	DBR42_14860	GCA_000988875.2	hypothetical protein	SP	Pelomonas sp. HMWF004	Bacteria; Proteobacteria; Betaproteobacteria; Burkholderiales; Comamonadaceae; Pelomonas
QAJF01000795.1	66	1679	2629	0	PTT84672.1	DBR42_14865	GCA_000988875.2	hypothetical protein	DUF3396	Pelomonas sp. HMWF004	Bacteria; Proteobacteria; Betaproteobacteria; Burkholderiales; Comamonadaceae; Pelomonas
PXWF02000322.1	67	41764	42315	0	PWF40542.1	C7C56_025840	GCA_003011895.2	hypothetical protein	RDD	Massilia glaciei	Bacteria; Proteobacteria; Betaproteobacteria; Burkholderiales; Oxalobacteraceae; Massilia
PXWF02000322.1	67	42906	43412	0	PWF40543.1	C7C56_025850	GCA_003011895.2	Rhs element Vgr protein		Massilia glaciei	Bacteria; Proteobacteria; Betaproteobacteria; Burkholderiales; Oxalobacteraceae; Massilia
PXWF02000322.1	67	43529	44095	0	PWF40544.1	C7C56_025855	GCA_003011895.2	PAAR domain-containing protein	PAAR_motif	Massilia glaciei	Bacteria; Proteobacteria; Betaproteobacteria; Burkholderiales; Oxalobacteraceae; Massilia
PXWF02000322.1	67	44275	44811	1	PWF40545.1	C7C56_025860	GCA_003011895.2	nuclease	VRR_NUC	Massilia glaciei	Bacteria; Proteobacteria; Betaproteobacteria; Burkholderiales; Oxalobacteraceae; Massilia
PXWF02000322.1	67	44275	44811	1	PWF40545.1	C7C56_025860	GCA_003011895.2	nuclease	VRR_NUC	Massilia glaciei	Bacteria; Proteobacteria; Betaproteobacteria; Burkholderiales; Oxalobacteraceae; Massilia
PXWF02000322.1	67	44816	45901	0	PWF40546.1	C7C56_025865	GCA_003011895.2	DUF3396 domain-containing protein	DUF3396	Massilia glaciei	Bacteria; Proteobacteria; Betaproteobacteria; Burkholderiales; Oxalobacteraceae; Massilia
PXWF02000322.1	67	46237	48066	0	PWF40547.1	C7C56_025875	GCA_003011895.2	type II/IV secretion system protein	T2SSE_N+T2SSE	Massilia glaciei	Bacteria; Proteobacteria; Betaproteobacteria; Burkholderiales; Oxalobacteraceae; Massilia
PXWF02000322.1	67	48101	48886	0	PWF40548.1	C7C56_025880	GCA_003011895.2	spermidine synthase	Methyltransf_25	Massilia glaciei	Bacteria; Proteobacteria; Betaproteobacteria; Burkholderiales; Oxalobacteraceae; Massilia
CP038228.1	68	630691	630924	0	QDI02762.1	E4A48_02775	GCA_003241185.1	hypothetical protein		Xanthomonas translucens pv. cerealis	Bacteria; Proteobacteria; Gammaproteobacteria; Xanthomonadales; Xanthomonadaceae; Xanthomonas
CP038228.1	68	630963	631214	0	QDI02763.1	E4A48_02780	GCA_003241185.1	type I toxin-antitoxin system SymE family toxin	SymE_toxin	Xanthomonas translucens pv. cerealis	Bacteria; Proteobacteria; Gammaproteobacteria; Xanthomonadales; Xanthomonadaceae; Xanthomonas
CP038228.1	68	631892	632458	0	QDI02764.1	E4A48_02790	GCA_003241185.1	PAAR domain-containing protein	PAAR_motif	Xanthomonas translucens pv. cerealis	Bacteria; Proteobacteria; Gammaproteobacteria; Xanthomonadales; Xanthomonadaceae; Xanthomonas
CP038228.1	68	632455	633165	1	QDI02765.1	E4A48_02795	GCA_003241185.1	VRR-NUC domain-containing protein	VRR_NUC	Xanthomonas translucens pv. cerealis	Bacteria; Proteobacteria; Gammaproteobacteria; Xanthomonadales; Xanthomonadaceae; Xanthomonas
CP038228.1	68	633102	634247	0	QDI02766.1	E4A48_02800	GCA_003241185.1	DUF3396 domain-containing protein	DUF3396	Xanthomonas translucens pv. cerealis	Bacteria; Proteobacteria; Gammaproteobacteria; Xanthomonadales; Xanthomonadaceae; Xanthomonas
CP038228.1	68	634434	635942	0	QDI02767.1	E4A48_02805	GCA_003241185.1	phosphatidylserine/phosphatidylglycerophosphate/ cardiolipin synthase family protein	PLDc_2+PLDc_2	Xanthomonas translucens pv. cerealis	Bacteria; Proteobacteria; Gammaproteobacteria; Xanthomonadales; Xanthomonadaceae; Xanthomonas
CP038228.1	68	636403	638250	0	QDI02768.1	E4A48_02810	GCA_003241185.1	beta-galactosidase	SP+Glyco_hydro_35	Xanthomonas translucens pv. cerealis	Bacteria; Proteobacteria; Gammaproteobacteria; Xanthomonadales; Xanthomonadaceae; Xanthomonas
CP050260.1	69	1949037	1949597	0	QIQ71403.1	HBB04_01770	GCA_001605315.2	Ribosomal-protein-serine acetyltransferase	Acetyltransf_3	Pseudomonas coronafaciens	Bacteria; Proteobacteria; Gammaproteobacteria; Pseudomonadales; Pseudomonadaceae; Pseudomonas
CP050260.1	69	1949597	1951168	0	QIQ71404.1	HBB04_01771	GCA_001605315.2	Alkaline phosphatase D	SP+PhoD_N+PhoD	Pseudomonas coronafaciens	Bacteria; Proteobacteria; Gammaproteobacteria; Pseudomonadales; Pseudomonadaceae; Pseudomonas
CP050260.1	69	1951306	1951932	0	QIQ71405.1	HBB04_01772	GCA_001605315.2	putative hydrolase YcaC	Isochorismatase	Pseudomonas coronafaciens	Bacteria; Proteobacteria; Gammaproteobacteria; Pseudomonadales; Pseudomonadaceae; Pseudomonas
CP050260.1	69	1951997	1952836	1	QIQ71406.1	HBB04_01773	GCA_001605315.2	hypothetical protein	VRR_NUC+DUF3396	Pseudomonas coronafaciens	Bacteria; Proteobacteria; Gammaproteobacteria; Pseudomonadales; Pseudomonadaceae; Pseudomonas
CP050260.1	69	1953757	1955070	0	QIQ71407.1	HBB04_01774	GCA_001605315.2	Biofilm dispersion protein BdlA	PAS_3+PAS_3+MCPsignal	Pseudomonas coronafaciens	Bacteria; Proteobacteria; Gammaproteobacteria; Pseudomonadales; Pseudomonadaceae; Pseudomonas
CP050260.1	69	1955332	1956294	0	QIQ71408.1	HBB04_01775	GCA_001605315.2	GDP-6-deoxy-D-mannose reductase	GDP_Man_Dehyd	Pseudomonas coronafaciens	Bacteria; Proteobacteria; Gammaproteobacteria; Pseudomonadales; Pseudomonadaceae; Pseudomonas
CP050260.1	69	1956383	1957429	0	QIQ71409.1	HBB04_01776	GCA_001605315.2	GDP-mannose 4,6-dehydratase	GDP_Man_Dehyd	Pseudomonas coronafaciens	Bacteria; Proteobacteria; Gammaproteobacteria; Pseudomonadales; Pseudomonadaceae; Pseudomonas
QNMN01001548.1	70	307	1392	0	RBC90978.1	BRN02_24430	GCA_001605315.2	DUF3396 domain-containing protein	DUF3396	Xanthomonas oryzae pv. oryzae	Bacteria; Proteobacteria; Gammaproteobacteria; Xanthomonadales; Xanthomonadaceae; Xanthomonas
QNMN01001548.1	70	1389	2459	0	RBC90979.1	BRN02_24435	GCA_001605315.2	DUF3396 domain-containing protein	DUF3396	Xanthomonas oryzae pv. oryzae	Bacteria; Proteobacteria; Gammaproteobacteria; Xanthomonadales; Xanthomonadaceae; Xanthomonas
QNMN01001548.1	70	2467	2922	1	RBC90980.1	BRN02_24440	GCA_001605315.2	VRR-NUC domain-containing protein	VRR_NUC	Xanthomonas oryzae pv. oryzae	Bacteria; Proteobacteria; Gammaproteobacteria; Xanthomonadales; Xanthomonadaceae; Xanthomonas
QNPS01001182.1	71	1	288	0	RBC10734.1	BRO02_15155	GCA_001605315.2	IS3 family transposase	rve_3	Xanthomonas oryzae pv. oryzae	Bacteria; Proteobacteria; Gammaproteobacteria; Xanthomonadales; Xanthomonadaceae; Xanthomonas
QNPS01001182.1	71	549	1634	0	RBC10735.1	BRO02_15165	GCA_001605315.2	hypothetical protein	DUF3396	Xanthomonas oryzae pv. oryzae	Bacteria; Proteobacteria; Gammaproteobacteria; Xanthomonadales; Xanthomonadaceae; Xanthomonas
QNPS01001182.1	71	1631	2701	0	RBC10736.1	BRO02_15170	GCA_001605315.2	DUF3396 domain-containing protein	DUF3396	Xanthomonas oryzae pv. oryzae	Bacteria; Proteobacteria; Gammaproteobacteria; Xanthomonadales; Xanthomonadaceae; Xanthomonas
QNPS01001182.1	71	2709	3054	1	RBC10737.1	BRO02_15175	GCA_001605315.2	VRR-NUC domain-containing protein	VRR_NUC	Xanthomonas oryzae pv. oryzae	Bacteria; Proteobacteria; Gammaproteobacteria; Xanthomonadales; Xanthomonadaceae; Xanthomonas
QWDM01000132.1	72	1	339	1	RUT67616.1	D0817_25515	GCA_003918735.1	VRR-NUC domain-containing protein	VRR_NUC	Flavobacterium cupreum	Bacteria; Bacteroidetes; Flavobacteriia; Flavobacteriales; Flavobacteriaceae; Flavobacterium
SEDR01003683.1	73	386	898	0	RZA04306.1	EOP02_40870	GCA_003918735.1	PAAR domain-containing protein	PAAR_motif	Proteobacteria bacterium	Bacteria; Proteobacteria
SEDR01003683.1	73	920	1510	1	RZA04307.1	EOP02_40875	GCA_003918735.1	VRR-NUC domain-containing protein	VRR_NUC	Proteobacteria bacterium	Bacteria; Proteobacteria
LT629788.1	74	896568	896741	0	SDU18797.1	SAMN04490196_0889	GCA_900066175.1	XapX domain-containing protein	DUF1427	Pseudomonas moraviensis	Bacteria; Proteobacteria; Gammaproteobacteria; Pseudomonadales; Pseudomonadaceae; Pseudomonas
LT629788.1	74	896771	897727	0	SDU18818.1	SAMN04490196_0890	GCA_900066175.1	NADPH:quinone reductase	ADH_N+ADH_zinc_N	Pseudomonas moraviensis	Bacteria; Proteobacteria; Gammaproteobacteria; Pseudomonadales; Pseudomonadaceae; Pseudomonas
LT629788.1	74	898093	900429	0	SDU18837.1	SAMN04490196_0891	GCA_900066175.1	type VI secretion system secreted protein VgrG	Phage_GPD+Phage_base_V	Pseudomonas moraviensis	Bacteria; Proteobacteria; Gammaproteobacteria; Pseudomonadales; Pseudomonadaceae; Pseudomonas
LT629788.1	74	900426	901760	1	SDU18863.1	SAMN04490196_0892	GCA_900066175.1	hypothetical protein	VRR_NUC	Pseudomonas moraviensis	Bacteria; Proteobacteria; Gammaproteobacteria; Pseudomonadales; Pseudomonadaceae; Pseudomonas
LT629788.1	74	901753	902859	0	SDU18886.1	SAMN04490196_0893	GCA_900066175.1	Protein of unknown function	TM+DUF3396	Pseudomonas moraviensis	Bacteria; Proteobacteria; Gammaproteobacteria; Pseudomonadales; Pseudomonadaceae; Pseudomonas
LT629788.1	74	903000	903848	0	SDU18906.1	SAMN04490196_0894	GCA_900066175.1	type VI secretion system protein ImpK	DotU	Pseudomonas moraviensis	Bacteria; Proteobacteria; Gammaproteobacteria; Pseudomonadales; Pseudomonadaceae; Pseudomonas
LT629788.1	74	903960	904994	0	SDU18932.1	SAMN04490196_0895	GCA_900066175.1	selenophosphate synthase	AIRS+AIRS_C	Pseudomonas moraviensis	Bacteria; Proteobacteria; Gammaproteobacteria; Pseudomonadales; Pseudomonadaceae; Pseudomonas
FPKH01000002.1	75	77946	79349	0	SFX61362.1	SAMN03097694_2595	GCA_900111745.1	solute:Na+ symporter, SSS family	TM+SSF+TM+TM	Janthinobacterium lividum	Bacteria; Proteobacteria; Betaproteobacteria; Burkholderiales; Oxalobacteraceae; Janthinobacterium
FPKH01000002.1	75	79351	80745	0	SFX61383.1	SAMN03097694_2596	GCA_900111745.1	H+/gluconate symporter	SP+TM+TM+TM+TM+TM+TM+TM+TM+TM+TM	Janthinobacterium lividum	Bacteria; Proteobacteria; Betaproteobacteria; Burkholderiales; Oxalobacteraceae; Janthinobacterium
FPKH01000002.1	75	82138	82719	0	SFX61406.1	SAMN03097694_2598	GCA_900111745.1	Zn-binding Pro-Ala-Ala-Arg (PAAR) domain-containing protein, incolved in TypeVI secretion	PAAR_motif	Janthinobacterium lividum	Bacteria; Proteobacteria; Betaproteobacteria; Burkholderiales; Oxalobacteraceae; Janthinobacterium
FPKH01000002.1	75	82716	83447	1	SFX61428.1	SAMN03097694_2599	GCA_900111745.1	VRR-NUC domain-containing protein	VRR_NUC	Janthinobacterium lividum	Bacteria; Proteobacteria; Betaproteobacteria; Burkholderiales; Oxalobacteraceae; Janthinobacterium
FPKH01000002.1	75	83457	84533	0	SFX61448.1	SAMN03097694_2600	GCA_900111745.1	Protein of unknown function	DUF3396	Janthinobacterium lividum	Bacteria; Proteobacteria; Betaproteobacteria; Burkholderiales; Oxalobacteraceae; Janthinobacterium
FPKH01000002.1	75	84538	85491	0	SFX61468.1	SAMN03097694_2601	GCA_900111745.1	hypothetical protein	Phage_int_SAM_4	Janthinobacterium lividum	Bacteria; Proteobacteria; Betaproteobacteria; Burkholderiales; Oxalobacteraceae; Janthinobacterium
FPKH01000002.1	75	85796	87889	0	SFX61492.1	SAMN03097694_2603	GCA_900111745.1	hypothetical protein	AsmA	Janthinobacterium lividum	Bacteria; Proteobacteria; Betaproteobacteria; Burkholderiales; Oxalobacteraceae; Janthinobacterium
UFKC01000091.1	76	1181	2527	0	SSQ91864.1	SAMEA104305247_03683	GCA_900249755.1	Uncharacterised protein		Acinetobacter baumannii	Bacteria; Proteobacteria; Gammaproteobacteria; Moraxellales; Moraxellaceae; Acinetobacter; Acinetobacter calcoaceticus/baumannii complex
UFKC01000091.1	76	2527	7419	0	SSQ91867.1	SAMEA104305247_03684	GCA_900249755.1	putative DNA helicase	NERD+AAA_11+AAA_12	Acinetobacter baumannii	Bacteria; Proteobacteria; Gammaproteobacteria; Moraxellales; Moraxellaceae; Acinetobacter; Acinetobacter calcoaceticus/baumannii complex
UFKC01000091.1	76	8304	9599	0	SSQ91869.1	SAMEA104305247_03685	GCA_900249755.1	Protein of uncharacterised function (DUF3396)	DUF3396	Acinetobacter baumannii	Bacteria; Proteobacteria; Gammaproteobacteria; Moraxellales; Moraxellaceae; Acinetobacter; Acinetobacter calcoaceticus/baumannii complex
UFKC01000091.1	76	9615	10358	1	SSQ91872.1	SAMEA104305247_03686	GCA_900249755.1	Uncharacterised protein	TM+TM	Acinetobacter baumannii	Bacteria; Proteobacteria; Gammaproteobacteria; Moraxellales; Moraxellaceae; Acinetobacter; Acinetobacter calcoaceticus/baumannii complex
UFKC01000091.1	76	10519	10902	0	SSQ91874.1	SAMEA104305247_03687	GCA_900249755.1	Transposase-like protein	rve+rve_3	Acinetobacter baumannii	Bacteria; Proteobacteria; Gammaproteobacteria; Moraxellales; Moraxellaceae; Acinetobacter; Acinetobacter calcoaceticus/baumannii complex
PDUM01000224.1	77	85	1371	0	TNC83563.1	CSH49_20935	GCA_004010555.2	hypothetical protein		Alcanivorax sp.	Bacteria; Proteobacteria; Gammaproteobacteria; Oceanospirillales; Alcanivoracaceae; Alcanivorax
PDUM01000224.1	77	1395	2327	0	TNC83564.1	CSH49_20940	GCA_004010555.2	hypothetical protein	DUF3396	Alcanivorax sp.	Bacteria; Proteobacteria; Gammaproteobacteria; Oceanospirillales; Alcanivoracaceae; Alcanivorax
PDUM01000224.1	77	2321	2982	1	TNC83565.1	CSH49_20945	GCA_004010555.2	hypothetical protein	DUF4150+VRR_NUC	Alcanivorax sp.	Bacteria; Proteobacteria; Gammaproteobacteria; Oceanospirillales; Alcanivoracaceae; Alcanivorax
SBLD01000012.1	78	7474	7992	0	TFH85854.1	EQG41_14675	GCA_004010555.2	Hcp family type VI secretion system effector	T6SS_HCP	Halomonas azerbaijanica	Bacteria; Proteobacteria; Gammaproteobacteria; Oceanospirillales; Halomonadaceae; Halomonas
SBLD01000012.1	78	8231	10354	0	TFH85855.1	EQG41_14680	GCA_004010555.2	type VI secretion system tip protein VgrG	Phage_GPD+Phage_base_V+DUF2345	Halomonas azerbaijanica	Bacteria; Proteobacteria; Gammaproteobacteria; Oceanospirillales; Halomonadaceae; Halomonas
SBLD01000012.1	78	10351	11274	0	TFH85856.1	EQG41_14685	GCA_004010555.2	DUF4123 domain-containing protein	DUF4123	Halomonas azerbaijanica	Bacteria; Proteobacteria; Gammaproteobacteria; Oceanospirillales; Halomonadaceae; Halomonas
SBLD01000012.1	78	11271	12083	1	TFH85857.1	EQG41_14690	GCA_004010555.2	hypothetical protein	VRR_NUC+TM+TM	Halomonas azerbaijanica	Bacteria; Proteobacteria; Gammaproteobacteria; Oceanospirillales; Halomonadaceae; Halomonas
SBLD01000012.1	78	12105	13064	0	TFH85858.1	EQG41_14695	GCA_004010555.2	DUF3396 domain-containing protein	DUF3396	Halomonas azerbaijanica	Bacteria; Proteobacteria; Gammaproteobacteria; Oceanospirillales; Halomonadaceae; Halomonas
SBLD01000012.1	78	13064	13471	0	TFH85859.1	EQG41_14700	GCA_004010555.2	hypothetical protein		Halomonas azerbaijanica	Bacteria; Proteobacteria; Gammaproteobacteria; Oceanospirillales; Halomonadaceae; Halomonas
SBLD01000012.1	78	13410	14477	0	TFH85860.1	EQG41_14705	GCA_004010555.2	DUF3396 domain-containing protein	DUF3396	Halomonas azerbaijanica	Bacteria; Proteobacteria; Gammaproteobacteria; Oceanospirillales; Halomonadaceae; Halomonas
VMHM01000008.1	79	1	893	0	TSJ98812.1	FPQ15_06540	GCA_007279795.1	DUF2345 domain-containing protein	T6SS_Vgr+DUF2345	Gilliamella apicola	Bacteria; Proteobacteria; Gammaproteobacteria; Orbales; Orbaceae; Gilliamella
VMHM01000008.1	79	905	2482	1	TSJ98813.1	FPQ15_06545	GCA_007279795.1	hypothetical protein	VRR_NUC	Gilliamella apicola	Bacteria; Proteobacteria; Gammaproteobacteria; Orbales; Orbaceae; Gilliamella
VMHM01000008.1	79	2519	3772	0	TSJ98814.1	FPQ15_06550	GCA_007279795.1	DUF3396 domain-containing protein	DUF3396	Gilliamella apicola	Bacteria; Proteobacteria; Gammaproteobacteria; Orbales; Orbaceae; Gilliamella
VMHM01000008.1	79	3791	5044	0	TSJ98815.1	FPQ15_06555	GCA_007279795.1	DUF3396 domain-containing protein	DUF3396	Gilliamella apicola	Bacteria; Proteobacteria; Gammaproteobacteria; Orbales; Orbaceae; Gilliamella
VMHM01000008.1	79	5063	6316	0	TSJ98816.1	FPQ15_06560	GCA_007279795.1	DUF3396 domain-containing protein	DUF3396	Gilliamella apicola	Bacteria; Proteobacteria; Gammaproteobacteria; Orbales; Orbaceae; Gilliamella
LR134137.1	80	1731016	1731822	0	VDZ78222.1	NCTC12419_02530	GCA_900591905.1	AMP nucleosidase	AMNp_N	Salmonella bongori	Bacteria; Proteobacteria; Gammaproteobacteria; Enterobacterales; Enterobacteriaceae; Salmonella
LR134137.1	80	1732153	1732539	0	VDZ78223.1	NCTC12419_02531	GCA_900591905.1	Protein of uncharacterised function (DUF3396)	DUF3396	Salmonella bongori	Bacteria; Proteobacteria; Gammaproteobacteria; Enterobacterales; Enterobacteriaceae; Salmonella
LR134137.1	80	1732882	1733139	0	VDZ78224.1	NCTC12419_02532	GCA_900591905.1	Uncharacterised protein		Salmonella bongori	Bacteria; Proteobacteria; Gammaproteobacteria; Enterobacterales; Enterobacteriaceae; Salmonella
LR134137.1	80	1733230	1733664	1	VDZ78225.1	NCTC12419_02533	GCA_900591905.1	Uncharacterised protein		Salmonella bongori	Bacteria; Proteobacteria; Gammaproteobacteria; Enterobacterales; Enterobacteriaceae; Salmonella
LR134137.1	80	1733825	1734379	0	VDZ78226.1	NCTC12419_02534	GCA_900591905.1	Putative transmembrane protein	DUF4150	Salmonella bongori	Bacteria; Proteobacteria; Gammaproteobacteria; Enterobacterales; Enterobacteriaceae; Salmonella
LR134137.1	80	1734596	1735183	0	VDZ78227.1	NCTC12419_02535	GCA_900591905.1	integrase	Arm-DNA-bind_3+AcylCoA_dehyd_C	Salmonella bongori	Bacteria; Proteobacteria; Gammaproteobacteria; Enterobacterales; Enterobacteriaceae; Salmonella
LR134137.1	80	1735703	1736098	0	VDZ78228.1	NCTC12419_02537	GCA_900591905.1	nitrogen assimilation regulatory protein (pseudogene)	HTH_1	Salmonella bongori	Bacteria; Proteobacteria; Gammaproteobacteria; Enterobacterales; Enterobacteriaceae; Salmonella
UUSG01000022.1	81	127	618	1	VBF78391.1	SAMEA2064732_04461	GCA_900591905.1	gp30	VRR_NUC	Burkholderia pseudomallei	Bacteria; Proteobacteria; Betaproteobacteria; Burkholderiales; Burkholderiaceae; Burkholderia; pseudomallei group
UUSG01000022.1	81	643	1857	0	VBF78395.1	SAMEA2064732_04462	GCA_900591905.1	gp30	DUF3396	Burkholderia pseudomallei	Bacteria; Proteobacteria; Betaproteobacteria; Burkholderiales; Burkholderiaceae; Burkholderia; pseudomallei group
UUSG01000022.1	81	2169	4904	0	VBF78399.1	SAMEA2064732_04463	GCA_900591905.1	Type III restriction-modification enzyme helicase subunit	ResIII+Tn7_Tnp_TnsA_N	Burkholderia pseudomallei	Bacteria; Proteobacteria; Betaproteobacteria; Burkholderiales; Burkholderiaceae; Burkholderia; pseudomallei group
UUSG01000022.1	81	4904	6607	0	VBF78404.1	SAMEA2064732_04464	GCA_900591905.1	adenine-specific DNA methylase	N6_N4_Mtase	Burkholderia pseudomallei	Bacteria; Proteobacteria; Betaproteobacteria; Burkholderiales; Burkholderiaceae; Burkholderia; pseudomallei group
UVMT01000011.1	82	226146	226565	0	VCK54465.1	SAMEA2066356_03373	GCA_900591905.1	Uncharacterised protein	SP	Burkholderia pseudomallei	Bacteria; Proteobacteria; Betaproteobacteria; Burkholderiales; Burkholderiaceae; Burkholderia; pseudomallei group
UVMT01000011.1	82	226901	227146	0	VCK54467.1	SAMEA2066356_03374	GCA_900591905.1	Uncharacterised protein		Burkholderia pseudomallei	Bacteria; Proteobacteria; Betaproteobacteria; Burkholderiales; Burkholderiaceae; Burkholderia; pseudomallei group
UVMT01000011.1	82	227283	227828	0	VCK54469.1	SAMEA2066356_03375	GCA_900591905.1	PAAR repeat-containing protein	PAAR_motif	Burkholderia pseudomallei	Bacteria; Proteobacteria; Betaproteobacteria; Burkholderiales; Burkholderiaceae; Burkholderia; pseudomallei group
UVMT01000011.1	82	227825	228559	1	VCK54471.1	SAMEA2066356_03376	GCA_900591905.1	putative bacteriophage protein gp29	VRR_NUC	Burkholderia pseudomallei	Bacteria; Proteobacteria; Betaproteobacteria; Burkholderiales; Burkholderiaceae; Burkholderia; pseudomallei group
UVMT01000011.1	82	228647	229729	0	VCK54474.1	SAMEA2066356_03377	GCA_900591905.1	gp30	DUF3396	Burkholderia pseudomallei	Bacteria; Proteobacteria; Betaproteobacteria; Burkholderiales; Burkholderiaceae; Burkholderia; pseudomallei group
UVMT01000011.1	82	229751	230557	0	VCK54476.1	SAMEA2066356_03378	GCA_900591905.1	Nucleotidyl transferase of uncharacterised function (DUF1814)	AbiEii	Burkholderia pseudomallei	Bacteria; Proteobacteria; Betaproteobacteria; Burkholderiales; Burkholderiaceae; Burkholderia; pseudomallei group
UVMT01000011.1	82	230749	231570	0	VCK54477.1	SAMEA2066356_03379	GCA_900591905.1	transcriptional regulator, y4mF family	HTH_31	Burkholderia pseudomallei	Bacteria; Proteobacteria; Betaproteobacteria; Burkholderiales; Burkholderiaceae; Burkholderia; pseudomallei group
CABVQP010000002.1	83	367600	368652	0	VWC75260.1	BLA50215_00863	GCF_000339455.1	L-carnitine dehydratase	CoA_transf_3	Burkholderia lata	Bacteria; Proteobacteria; Betaproteobacteria; Burkholderiales; Burkholderiaceae; Burkholderia; Burkholderia cepacia complex
CABVQP010000002.1	83	368780	369163	0	VWC75274.1	BLA50215_00864	GCF_000339455.1	hypothetical protein		Burkholderia lata	Bacteria; Proteobacteria; Betaproteobacteria; Burkholderiales; Burkholderiaceae; Burkholderia; Burkholderia cepacia complex
CABVQP010000002.1	83	369419	372271	0	VWC75286.1	BLA50215_00865	GCF_000339455.1	type IV secretion protein Rhs	Phage_GPD+Phage_base_V+T6SS_Vgr+DUF2345	Burkholderia lata	Bacteria; Proteobacteria; Betaproteobacteria; Burkholderiales; Burkholderiaceae; Burkholderia; Burkholderia cepacia complex
CABVQP010000002.1	83	372297	373304	1	VWC75298.1	BLA50215_00866	GCF_000339455.1	bacteriophage gp30 protein		Burkholderia lata	Bacteria; Proteobacteria; Betaproteobacteria; Burkholderiales; Burkholderiaceae; Burkholderia; Burkholderia cepacia complex
CABVQP010000002.1	83	373600	374934	0	VWC75311.1	BLA50215_00867	GCF_000339455.1	GP30 family protein	DUF3396+DUF3396	Burkholderia lata	Bacteria; Proteobacteria; Betaproteobacteria; Burkholderiales; Burkholderiaceae; Burkholderia; Burkholderia cepacia complex
CABVQP010000002.1	83	374892	375239	0	VWC75324.1	BLA50215_00868	GCF_000339455.1	hypothetical protein	PAAR_motif	Burkholderia lata	Bacteria; Proteobacteria; Betaproteobacteria; Burkholderiales; Burkholderiaceae; Burkholderia; Burkholderia cepacia complex
CABVQP010000002.1	83	375253	375945	0	VWC75348.1	BLA50215_00869	GCF_000339455.1	hypothetical protein		Burkholderia lata	Bacteria; Proteobacteria; Betaproteobacteria; Burkholderiales; Burkholderiaceae; Burkholderia; Burkholderia cepacia complex
NZ_CH899760.1	84	556356	557009	0	WP_004532770.1	BURPSS13_RS03955	GCF_000152365.1	AAA family ATPase	CbiA	Burkholderia pseudomallei S13	Bacteria; Proteobacteria; Betaproteobacteria; Burkholderiales; Burkholderiaceae; Burkholderia; pseudomallei group
NZ_CH899760.1	84	557243	557365	0	WP_009897078.1	BURPSS13_RS03960	GCF_000152365.1	CopG family transcriptional regulator	RHH_1	Burkholderia pseudomallei S13	Bacteria; Proteobacteria; Betaproteobacteria; Burkholderiales; Burkholderiaceae; Burkholderia; pseudomallei group
NZ_CH899760.1	84	557468	558001	0	WP_004532793.1	BURPSS13_RS03965	GCF_000152365.1	bacteriophage gp29 protein	PAAR_motif	Burkholderia pseudomallei S13	Bacteria; Proteobacteria; Betaproteobacteria; Burkholderiales; Burkholderiaceae; Burkholderia; pseudomallei group
NZ_CH899760.1	84	557998	558735	1	WP_004532838.1	BURPSS13_RS03970	GCF_000152365.1	VRR-NUC domain-containing protein	VRR_NUC	Burkholderia pseudomallei S13	Bacteria; Proteobacteria; Betaproteobacteria; Burkholderiales; Burkholderiaceae; Burkholderia; pseudomallei group
NZ_CH899760.1	84	557998	558735	1	WP_004532838.1	BURPSS13_RS03970	GCF_000152365.1	VRR-NUC domain-containing protein	VRR_NUC	Burkholderia pseudomallei S13	Bacteria; Proteobacteria; Betaproteobacteria; Burkholderiales; Burkholderiaceae; Burkholderia; pseudomallei group
NZ_CH899760.1	84	558750	559865	0	WP_029670743.1	BURPSS13_RS03975	GCF_000152365.1	DUF3396 domain-containing protein	DUF3396	Burkholderia pseudomallei S13	Bacteria; Proteobacteria; Betaproteobacteria; Burkholderiales; Burkholderiaceae; Burkholderia; pseudomallei group
NZ_CH899760.1	84	560457	560753	0	WP_004532728.1	BURPSS13_RS03980	GCF_000152365.1	type II toxin-antitoxin system RelE/ParE family toxin	Gp49	Burkholderia pseudomallei S13	Bacteria; Proteobacteria; Betaproteobacteria; Burkholderiales; Burkholderiaceae; Burkholderia; pseudomallei group
NZ_CH899760.1	84	560756	561112	0	WP_004202809.1	BURPSS13_RS03985	GCF_000152365.1	putative addiction module antidote protein		Burkholderia pseudomallei S13	Bacteria; Proteobacteria; Betaproteobacteria; Burkholderiales; Burkholderiaceae; Burkholderia; pseudomallei group
NZ_AMWL02000023.1	85	3461	4639	0	WP_004241473.1	C790_RS14775	GCF_000307755.2	DUF3396 domain-containing protein	DUF3396	Morganella morganii SC01	Bacteria; Proteobacteria; Gammaproteobacteria; Enterobacterales; Morganellaceae; Morganella
NZ_AMWL02000023.1	85	4695	4961	0	WP_004241474.1	C790_RS14780	GCF_000307755.2	PAAR domain-containing protein	PAAR_motif	Morganella morganii SC01	Bacteria; Proteobacteria; Gammaproteobacteria; Enterobacterales; Morganellaceae; Morganella
NZ_AMWL02000023.1	85	4951	6129	0	WP_105369931.1	C790_RS14785	GCF_000307755.2	DUF3396 domain-containing protein	DUF3396	Morganella morganii SC01	Bacteria; Proteobacteria; Gammaproteobacteria; Enterobacterales; Morganellaceae; Morganella
NZ_AMWL02000023.1	85	6139	7584	1	WP_004241478.1	C790_RS14790	GCF_000307755.2	VRR-NUC domain-containing protein	VRR_NUC+TM+TM	Morganella morganii SC01	Bacteria; Proteobacteria; Gammaproteobacteria; Enterobacterales; Morganellaceae; Morganella
NZ_AMWL02000023.1	85	7581	9803	0	WP_105369850.1	C790_RS14795	GCF_000307755.2	type VI secretion system tip protein VgrG	Phage_GPD+Phage_base_V	Morganella morganii SC01	Bacteria; Proteobacteria; Gammaproteobacteria; Enterobacterales; Morganellaceae; Morganella
NZ_AMWL02000023.1	85	9890	10408	0	WP_004241485.1	C790_RS14800	GCF_000307755.2	Hcp family type VI secretion system effector	T6SS_HCP	Morganella morganii SC01	Bacteria; Proteobacteria; Gammaproteobacteria; Enterobacterales; Morganellaceae; Morganella
NZ_AMWL02000023.1	85	11349	11828	0	WP_036421700.1	C790_RS14805	GCF_000307755.2	hypothetical protein		Morganella morganii SC01	Bacteria; Proteobacteria; Gammaproteobacteria; Enterobacterales; Morganellaceae; Morganella
NZ_ABLK01000022.1	86	8646	9176	0	WP_006757116.1	BAMMEX5DRAFT_RS05530	GCF_000182015.1	ImmA/IrrE family metallo-endopeptidase	Peptidase_M78	Burkholderia ambifaria MEX-5	Bacteria; Proteobacteria; Betaproteobacteria; Burkholderiales; Burkholderiaceae; Burkholderia; Burkholderia cepacia complex
NZ_ABLK01000022.1	86	9435	10550	0	WP_006757117.1	BAMMEX5DRAFT_RS05535	GCF_000182015.1	DUF3396 domain-containing protein	DUF3396	Burkholderia ambifaria MEX-5	Bacteria; Proteobacteria; Betaproteobacteria; Burkholderiales; Burkholderiaceae; Burkholderia; Burkholderia cepacia complex
NZ_ABLK01000022.1	86	10593	11681	0	WP_006757118.1	BAMMEX5DRAFT_RS05540	GCF_000182015.1	DUF3396 domain-containing protein	DUF3396	Burkholderia ambifaria MEX-5	Bacteria; Proteobacteria; Betaproteobacteria; Burkholderiales; Burkholderiaceae; Burkholderia; Burkholderia cepacia complex
NZ_ABLK01000022.1	86	11687	12391	1	WP_006757119.1	BAMMEX5DRAFT_RS05545	GCF_000182015.1	VRR-NUC domain-containing protein	VRR_NUC	Burkholderia ambifaria MEX-5	Bacteria; Proteobacteria; Betaproteobacteria; Burkholderiales; Burkholderiaceae; Burkholderia; Burkholderia cepacia complex
NZ_ABLK01000022.1	86	12388	12897	0	WP_006757120.1	BAMMEX5DRAFT_RS05550	GCF_000182015.1	PAAR domain-containing protein	PAAR_motif	Burkholderia ambifaria MEX-5	Bacteria; Proteobacteria; Betaproteobacteria; Burkholderiales; Burkholderiaceae; Burkholderia; Burkholderia cepacia complex
NZ_ABLK01000022.1	86	13067	13285	0	WP_006757121.1	BAMMEX5DRAFT_RS36850	GCF_000182015.1	AlpA family phage regulatory protein	Phage_AlpA	Burkholderia ambifaria MEX-5	Bacteria; Proteobacteria; Betaproteobacteria; Burkholderiales; Burkholderiaceae; Burkholderia; Burkholderia cepacia complex
NZ_ABLK01000022.1	86	14404	15288	0	WP_006757123.1	BAMMEX5DRAFT_RS36855	GCF_000182015.1	sce7726 family protein	SP	Burkholderia ambifaria MEX-5	Bacteria; Proteobacteria; Betaproteobacteria; Burkholderiales; Burkholderiaceae; Burkholderia; Burkholderia cepacia complex
NZ_KB233231.1	87	340240	342009	0	WP_006662540.1	OO9_RS11650	GCF_000314875.2	type VI secretion system baseplate subunit TssF	T6SS_TssF	Providencia alcalifaciens Dmel2	Bacteria; Proteobacteria; Gammaproteobacteria; Enterobacterales; Morganellaceae; Providencia
NZ_KB233231.1	87	341973	343055	0	WP_006662541.1	OO9_RS11655	GCF_000314875.2	type VI secretion system baseplate subunit TssG	T6SS_TssG	Providencia alcalifaciens Dmel2	Bacteria; Proteobacteria; Gammaproteobacteria; Enterobacterales; Morganellaceae; Providencia
NZ_KB233231.1	87	343125	343622	0	WP_036972877.1	OO9_RS11660	GCF_000314875.2	type VI secretion system lipoprotein TssJ	SP+T6SS-SciN	Providencia alcalifaciens Dmel2	Bacteria; Proteobacteria; Gammaproteobacteria; Enterobacterales; Morganellaceae; Providencia
NZ_KB233231.1	87	346265	347521	1	WP_006662544.1	OO9_RS11670	GCF_000314875.2	hypothetical protein		Providencia alcalifaciens Dmel2	Bacteria; Proteobacteria; Gammaproteobacteria; Enterobacterales; Morganellaceae; Providencia
NZ_KB233231.1	87	347523	348524	0	WP_006662545.1	OO9_RS11675	GCF_000314875.2	DUF3396 domain-containing protein	DUF3396	Providencia alcalifaciens Dmel2	Bacteria; Proteobacteria; Gammaproteobacteria; Enterobacterales; Morganellaceae; Providencia
NZ_KB233231.1	87	349351	350178	0	WP_006662547.1	OO9_RS11685	GCF_000314875.2	DUF4123 domain-containing protein	DUF4123	Providencia alcalifaciens Dmel2	Bacteria; Proteobacteria; Gammaproteobacteria; Enterobacterales; Morganellaceae; Providencia
NZ_KB233231.1	87	350338	350868	0	WP_006662548.1	OO9_RS11690	GCF_000314875.2	DUF3304 domain-containing protein	SP	Providencia alcalifaciens Dmel2	Bacteria; Proteobacteria; Gammaproteobacteria; Enterobacterales; Morganellaceae; Providencia
NZ_AKIW01000024.1	88	10207	10680	0	WP_007830904.1	PMI12_RS08020	GCF_000282635.1	DUF6484 domain-containing protein	DUF6484	Variovorax sp. CF313	Bacteria; Proteobacteria; Betaproteobacteria; Burkholderiales; Comamonadaceae; Variovorax
NZ_AKIW01000024.1	88	10692	11741	0	WP_007830906.1	PMI12_RS08025	GCF_000282635.1	DUF2169 domain-containing protein	DUF2169	Variovorax sp. CF313	Bacteria; Proteobacteria; Betaproteobacteria; Burkholderiales; Comamonadaceae; Variovorax
NZ_AKIW01000024.1	88	11738	12802	0	WP_007830907.1	PMI12_RS08030	GCF_000282635.1	3-oxoacyl-(acyl-carrier-protein) synthase	ketoacyl-synt	Variovorax sp. CF313	Bacteria; Proteobacteria; Betaproteobacteria; Burkholderiales; Comamonadaceae; Variovorax
NZ_AKIW01000024.1	88	12806	13738	1	WP_007830908.1	PMI12_RS28035	GCF_000282635.1	DUF4150 domain-containing protein	DUF4150+VRR_NUC	Variovorax sp. CF313	Bacteria; Proteobacteria; Betaproteobacteria; Burkholderiales; Comamonadaceae; Variovorax
NZ_AKIW01000024.1	88	13769	14710	0	WP_007830914.1	PMI12_RS08040	GCF_000282635.1	DUF3396 domain-containing protein	DUF3396	Variovorax sp. CF313	Bacteria; Proteobacteria; Betaproteobacteria; Burkholderiales; Comamonadaceae; Variovorax
NZ_AKIW01000024.1	88	14716	15396	0	WP_007830916.1	PMI12_RS08045	GCF_000282635.1	hypothetical protein		Variovorax sp. CF313	Bacteria; Proteobacteria; Betaproteobacteria; Burkholderiales; Comamonadaceae; Variovorax
NZ_AKIW01000024.1	88	15393	16661	0	WP_007830918.1	PMI12_RS08050	GCF_000282635.1	TIGR02270 family protein	HEAT_2	Variovorax sp. CF313	Bacteria; Proteobacteria; Betaproteobacteria; Burkholderiales; Comamonadaceae; Variovorax
NZ_ABBD01000767.1	89	25936	26799	0	WP_198405567.1	BTHAI0002_RS31955	GCF_000170315.1	hypothetical protein		Burkholderia thailandensis TXDOH	Bacteria; Proteobacteria; Betaproteobacteria; Burkholderiales; Burkholderiaceae; Burkholderia; pseudomallei group
NZ_ABBD01000767.1	89	27040	29373	0	WP_157779362.1	BTHAI0002_RS41235	GCF_000170315.1	hypothetical protein	DUF3450	Burkholderia thailandensis TXDOH	Bacteria; Proteobacteria; Betaproteobacteria; Burkholderiales; Burkholderiaceae; Burkholderia; pseudomallei group
NZ_ABBD01000767.1	89	29702	30916	0	WP_009906852.1	BTHAI0002_RS31975	GCF_000170315.1	DUF3396 domain-containing protein	DUF3396	Burkholderia thailandensis TXDOH	Bacteria; Proteobacteria; Betaproteobacteria; Burkholderiales; Burkholderiaceae; Burkholderia; pseudomallei group
NZ_ABBD01000767.1	89	30927	31676	1	WP_009906853.1	BTHAI0002_RS31980	GCF_000170315.1	VRR-NUC domain-containing protein	VRR_NUC	Burkholderia thailandensis TXDOH	Bacteria; Proteobacteria; Betaproteobacteria; Burkholderiales; Burkholderiaceae; Burkholderia; pseudomallei group
NZ_ABBD01000767.1	89	31673	32200	0	WP_009906854.1	BTHAI0002_RS31985	GCF_000170315.1	PAAR domain-containing protein	PAAR_motif	Burkholderia thailandensis TXDOH	Bacteria; Proteobacteria; Betaproteobacteria; Burkholderiales; Burkholderiaceae; Burkholderia; pseudomallei group
NZ_ABBD01000767.1	89	32582	32905	0	WP_009906855.1	BTHAI0002_RS39030	GCF_000170315.1	helix-turn-helix domain-containing protein	HTH_3	Burkholderia thailandensis TXDOH	Bacteria; Proteobacteria; Betaproteobacteria; Burkholderiales; Burkholderiaceae; Burkholderia; pseudomallei group
NZ_ABBD01000767.1	89	32889	33272	0	WP_009906856.1	BTHAI0002_RS31990	GCF_000170315.1	type II toxin-antitoxin system RelE/ParE family toxin	RelE	Burkholderia thailandensis TXDOH	Bacteria; Proteobacteria; Betaproteobacteria; Burkholderiales; Burkholderiaceae; Burkholderia; pseudomallei group
NZ_ABBE01000043.1	90	9896	10903	0	WP_010089127.1	BUBO0001_RS01025	GCF_000170335.1	zinc-binding alcohol dehydrogenase family protein	ADH_N+ADH_zinc_N_2	Burkholderia ubonensis Bu	Bacteria; Proteobacteria; Betaproteobacteria; Burkholderiales; Burkholderiaceae; Burkholderia; Burkholderia cepacia complex
NZ_ABBE01000043.1	90	11013	11300	0	WP_029226103.1	BUBO0001_RS01030	GCF_000170335.1	antibiotic biosynthesis monooxygenase	ABM	Burkholderia ubonensis Bu	Bacteria; Proteobacteria; Betaproteobacteria; Burkholderiales; Burkholderiaceae; Burkholderia; Burkholderia cepacia complex
NZ_ABBE01000043.1	90	11743	12858	0	WP_010089129.1	BUBO0001_RS01035	GCF_000170335.1	DUF3396 domain-containing protein	DUF3396	Burkholderia ubonensis Bu	Bacteria; Proteobacteria; Betaproteobacteria; Burkholderiales; Burkholderiaceae; Burkholderia; Burkholderia cepacia complex
NZ_ABBE01000043.1	90	12864	13634	1	WP_010089130.1	BUBO0001_RS01040	GCF_000170335.1	VRR-NUC domain-containing protein	VRR_NUC	Burkholderia ubonensis Bu	Bacteria; Proteobacteria; Betaproteobacteria; Burkholderiales; Burkholderiaceae; Burkholderia; Burkholderia cepacia complex
NZ_ABBE01000043.1	90	13631	14152	0	WP_029226104.1	BUBO0001_RS01045	GCF_000170335.1	PAAR domain-containing protein	PAAR_motif	Burkholderia ubonensis Bu	Bacteria; Proteobacteria; Betaproteobacteria; Burkholderiales; Burkholderiaceae; Burkholderia; Burkholderia cepacia complex
NZ_ABBE01000043.1	90	14647	14937	0	WP_010089132.1	BUBO0001_RS01050	GCF_000170335.1	hypothetical protein	SP+PXPV	Burkholderia ubonensis Bu	Bacteria; Proteobacteria; Betaproteobacteria; Burkholderiales; Burkholderiaceae; Burkholderia; Burkholderia cepacia complex
NZ_ABBE01000043.1	90	15328	16080	0	WP_010089133.1	BUBO0001_RS01055	GCF_000170335.1	TIGR00730 family Rossman fold protein	DNA_processg_A+Lysine_decarbox	Burkholderia ubonensis Bu	Bacteria; Proteobacteria; Betaproteobacteria; Burkholderiales; Burkholderiaceae; Burkholderia; Burkholderia cepacia complex
NZ_AMFQ01000071.1	91	1	1049	0	WP_009585225.1	ACINWC743_RS09035	GCF_000335555.1	DUF3396 domain-containing protein	DUF3396	Acinetobacter sp. WC-743	Bacteria; Proteobacteria; Gammaproteobacteria; Moraxellales; Moraxellaceae; Acinetobacter
NZ_AMFQ01000071.1	91	1067	2164	0	WP_009585219.1	ACINWC743_RS09040	GCF_000335555.1	DUF3396 domain-containing protein	DUF3396	Acinetobacter sp. WC-743	Bacteria; Proteobacteria; Gammaproteobacteria; Moraxellales; Moraxellaceae; Acinetobacter
NZ_AMFQ01000071.1	91	2175	2909	1	WP_009585216.1	ACINWC743_RS09045	GCF_000335555.1	VRR-NUC domain-containing protein	VRR_NUC	Acinetobacter sp. WC-743	Bacteria; Proteobacteria; Gammaproteobacteria; Moraxellales; Moraxellaceae; Acinetobacter
NZ_AMFQ01000071.1	91	2902	3435	0	WP_009585207.1	ACINWC743_RS09050	GCF_000335555.1	PAAR domain-containing protein	PAAR_motif	Acinetobacter sp. WC-743	Bacteria; Proteobacteria; Gammaproteobacteria; Moraxellales; Moraxellaceae; Acinetobacter
NZ_AMFQ01000071.1	91	3815	4924	0	WP_009585202.1	ACINWC743_RS09055	GCF_000335555.1	acyltransferase	Acyl_transf_3	Acinetobacter sp. WC-743	Bacteria; Proteobacteria; Gammaproteobacteria; Moraxellales; Moraxellaceae; Acinetobacter
NZ_AMFQ01000071.1	91	5166	6599	0	WP_005033615.1	ACINWC743_RS09060	GCF_000335555.1	amino acid permease	AA_permease	Acinetobacter sp. WC-743	Bacteria; Proteobacteria; Gammaproteobacteria; Moraxellales; Moraxellaceae; Acinetobacter
NC_012724.2	92	2617907	2618308	0	WP_043307394.1	BGLU_RS12075	GCF_000022645.2	helix-turn-helix domain-containing protein	HTH_31	Burkholderia glumae BGR1	Bacteria; Proteobacteria; Betaproteobacteria; Burkholderiales; Burkholderiaceae; Burkholderia
NC_012724.2	92	2618380	2619075	0	WP_015876335.1	BGLU_RS12080	GCF_000022645.2	SOS response-associated peptidase	SRAP	Burkholderia glumae BGR1	Bacteria; Proteobacteria; Betaproteobacteria; Burkholderiales; Burkholderiaceae; Burkholderia
NC_012724.2	92	2619222	2619749	0	WP_015876336.1	BGLU_RS32405	GCF_000022645.2	PAAR domain-containing protein	PAAR_motif	Burkholderia glumae BGR1	Bacteria; Proteobacteria; Betaproteobacteria; Burkholderiales; Burkholderiaceae; Burkholderia
NC_012724.2	92	2619746	2620498	1	WP_015876337.1	BGLU_RS12085	GCF_000022645.2	VRR-NUC domain-containing protein	VRR_NUC	Burkholderia glumae BGR1	Bacteria; Proteobacteria; Betaproteobacteria; Burkholderiales; Burkholderiaceae; Burkholderia
NC_012724.2	92	2620507	2621721	0	WP_015876338.1	BGLU_RS12090	GCF_000022645.2	DUF3396 domain-containing protein	DUF3396	Burkholderia glumae BGR1	Bacteria; Proteobacteria; Betaproteobacteria; Burkholderiales; Burkholderiaceae; Burkholderia
NC_012724.2	92	2622051	2622905	0	WP_015876339.1	BGLU_RS12095	GCF_000022645.2	transposase		Burkholderia glumae BGR1	Bacteria; Proteobacteria; Betaproteobacteria; Burkholderiales; Burkholderiaceae; Burkholderia
NC_012724.2	92	2622883	2623710	0	WP_043307398.1	BGLU_RS12100	GCF_000022645.2	hypothetical protein	HNH	Burkholderia glumae BGR1	Bacteria; Proteobacteria; Betaproteobacteria; Burkholderiales; Burkholderiaceae; Burkholderia
NC_013421.1	93	3882474	3883145	0	WP_015731099.1	PECWA_RS17375	GCF_000024645.1	7-carboxy-7-deazaguanine synthase QueE	Fer4_14	Pectobacterium parmentieri WPP163	Bacteria; Proteobacteria; Gammaproteobacteria; Enterobacterales; Pectobacteriaceae; Pectobacterium
NC_013421.1	93	3883519	3884502	0	WP_015731100.1	PECWA_RS17380	GCF_000024645.1	MBL fold metallo-hydrolase	SP+Lactamase_B	Pectobacterium parmentieri WPP163	Bacteria; Proteobacteria; Gammaproteobacteria; Enterobacterales; Pectobacteriaceae; Pectobacterium
NC_013421.1	93	3885051	3887228	0	WP_015731101.1	PECWA_RS17385	GCF_000024645.1	type VI secretion system tip protein VgrG	Phage_GPD+Phage_base_V	Pectobacterium parmentieri WPP163	Bacteria; Proteobacteria; Gammaproteobacteria; Enterobacterales; Pectobacteriaceae; Pectobacterium
NC_013421.1	93	3887221	3888570	1	WP_015731102.1	PECWA_RS17390	GCF_000024645.1	VRR-NUC domain-containing protein	VRR_NUC+TM+TM	Pectobacterium parmentieri WPP163	Bacteria; Proteobacteria; Gammaproteobacteria; Enterobacterales; Pectobacteriaceae; Pectobacterium
NC_013421.1	93	3888589	3889746	0	WP_015731103.1	PECWA_RS17395	GCF_000024645.1	DUF3396 domain-containing protein	DUF3396	Pectobacterium parmentieri WPP163	Bacteria; Proteobacteria; Gammaproteobacteria; Enterobacterales; Pectobacteriaceae; Pectobacterium
NC_013421.1	93	3889844	3891193	0	WP_015731105.1	PECWA_RS17400	GCF_000024645.1	VRR-NUC domain-containing protein	VRR_NUC+TM+TM	Pectobacterium parmentieri WPP163	Bacteria; Proteobacteria; Gammaproteobacteria; Enterobacterales; Pectobacteriaceae; Pectobacterium
NC_013421.1	93	3891212	3892366	0	WP_015731106.1	PECWA_RS17405	GCF_000024645.1	DUF3396 domain-containing protein	DUF3396	Pectobacterium parmentieri WPP163	Bacteria; Proteobacteria; Gammaproteobacteria; Enterobacterales; Pectobacteriaceae; Pectobacterium
NZ_ATGG01000064.1	94	175	1278	0	WP_016541447.1	F957_RS00285	GCF_000413855.1	DUF3396 domain-containing protein	DUF3396	Acinetobacter gyllenbergii CIP 110306 = MTCC 11365	Bacteria; Proteobacteria; Gammaproteobacteria; Pseudomonadales; Moraxellaceae; Acinetobacter
NZ_ATGG01000064.1	94	1294	2004	1	WP_016541448.1	F957_RS00280	GCF_000413855.1	VRR-NUC domain-containing protein	VRR_NUC+TM	Acinetobacter gyllenbergii CIP 110306 = MTCC 11365	Bacteria; Proteobacteria; Gammaproteobacteria; Pseudomonadales; Moraxellaceae; Acinetobacter
NZ_ATGG01000064.1	94	1997	2536	0	WP_016541449.1	F957_RS00275	GCF_000413855.1	PAAR domain-containing protein	PAAR_motif	Acinetobacter gyllenbergii CIP 110306 = MTCC 11365	Bacteria; Proteobacteria; Gammaproteobacteria; Pseudomonadales; Moraxellaceae; Acinetobacter
NZ_ATGG01000064.1	94	2777	5314	0	WP_016541450.1	F957_RS00270	GCF_000413855.1	sulfite reductase flavoprotein subunit alpha	PepSY_TM+Flavodoxin_1+NAD_binding_1	Acinetobacter gyllenbergii CIP 110306 = MTCC 11365	Bacteria; Proteobacteria; Gammaproteobacteria; Pseudomonadales; Moraxellaceae; Acinetobacter
NZ_ATGG01000064.1	94	5438	6223	0	WP_016541451.1	F957_RS00265	GCF_000413855.1	YdcF family protein	TM+TM+TM+DUF218	Acinetobacter gyllenbergii CIP 110306 = MTCC 11365	Bacteria; Proteobacteria; Gammaproteobacteria; Pseudomonadales; Moraxellaceae; Acinetobacter
NZ_ALOY01000139.1	95	680	1903	1	WP_019464795.1	B556_RS0106815	GCF_000292265.1	VRR-NUC domain-containing protein	VRR_NUC+TM+TM	Dyella japonica A8	Bacteria; Proteobacteria; Gammaproteobacteria; Xanthomonadales; Rhodanobacteraceae; Dyella
NZ_ALOY01000139.1	95	680	1903	1	WP_019464795.1	B556_RS0106815	GCF_000292265.1	VRR-NUC domain-containing protein	VRR_NUC+TM+TM	Dyella japonica A8	Bacteria; Proteobacteria; Gammaproteobacteria; Xanthomonadales; Rhodanobacteraceae; Dyella
NZ_ALOY01000139.1	95	1947	3173	0	WP_026033841.1	B556_RS0106820	GCF_000292265.1	DUF3396 domain-containing protein	DUF3396+DUF3396	Dyella japonica A8	Bacteria; Proteobacteria; Gammaproteobacteria; Xanthomonadales; Rhodanobacteraceae; Dyella
NZ_ALOY01000139.1	95	3200	4375	0	WP_100218173.1	B556_RS0106825	GCF_000292265.1	DUF3396 domain-containing protein	DUF3396+DUF3396	Dyella japonica A8	Bacteria; Proteobacteria; Gammaproteobacteria; Xanthomonadales; Rhodanobacteraceae; Dyella
NZ_ALOY01000139.1	95	4576	5649	0	WP_026033842.1	B556_RS0106830	GCF_000292265.1	alkene reductase	Oxidored_FMN	Dyella japonica A8	Bacteria; Proteobacteria; Gammaproteobacteria; Xanthomonadales; Rhodanobacteraceae; Dyella
NZ_KB849544.1	96	582398	583033	0	WP_004866315.1	F960_RS14010	GCF_000368565.1	hypothetical protein		Acinetobacter gerneri DSM 14967 = CIP 107464 = MTCC 9824	Bacteria; Proteobacteria; Gammaproteobacteria; Pseudomonadales; Moraxellaceae; Acinetobacter
NZ_KB849544.1	96	583102	583551	0	WP_004866317.1	F960_RS14015	GCF_000368565.1	hypothetical protein	DUF2345	Acinetobacter gerneri DSM 14967 = CIP 107464 = MTCC 9824	Bacteria; Proteobacteria; Gammaproteobacteria; Pseudomonadales; Moraxellaceae; Acinetobacter
NZ_KB849544.1	96	583564	583725	0	WP_004866320.1	F960_RS22395	GCF_000368565.1	hypothetical protein		Acinetobacter gerneri DSM 14967 = CIP 107464 = MTCC 9824	Bacteria; Proteobacteria; Gammaproteobacteria; Pseudomonadales; Moraxellaceae; Acinetobacter
NZ_KB849544.1	96	583812	584867	1	WP_020846545.1	F960_RS14020	GCF_000368565.1	VRR-NUC domain-containing protein	VRR_NUC	Acinetobacter gerneri DSM 14967 = CIP 107464 = MTCC 9824	Bacteria; Proteobacteria; Gammaproteobacteria; Pseudomonadales; Moraxellaceae; Acinetobacter
NZ_KB849544.1	96	583812	584867	1	WP_020846545.1	F960_RS14020	GCF_000368565.1	VRR-NUC domain-containing protein	VRR_NUC	Acinetobacter gerneri DSM 14967 = CIP 107464 = MTCC 9824	Bacteria; Proteobacteria; Gammaproteobacteria; Pseudomonadales; Moraxellaceae; Acinetobacter
NZ_KB849544.1	96	586701	587531	0	WP_020846634.1	F960_RS14045	GCF_000368565.1	protein kinase	Pkinase	Acinetobacter gerneri DSM 14967 = CIP 107464 = MTCC 9824	Bacteria; Proteobacteria; Gammaproteobacteria; Pseudomonadales; Moraxellaceae; Acinetobacter
NZ_KB849544.1	96	587524	589041	0	WP_004866333.1	F960_RS14050	GCF_000368565.1	DUF3336 domain-containing protein	DUF3336+Patatin	Acinetobacter gerneri DSM 14967 = CIP 107464 = MTCC 9824	Bacteria; Proteobacteria; Gammaproteobacteria; Pseudomonadales; Moraxellaceae; Acinetobacter
NZ_KB849544.1	96	589254	590126	0	WP_004866337.1	F960_RS14055	GCF_000368565.1	ATP-binding protein	DUF815	Acinetobacter gerneri DSM 14967 = CIP 107464 = MTCC 9824	Bacteria; Proteobacteria; Gammaproteobacteria; Pseudomonadales; Moraxellaceae; Acinetobacter
NZ_AYSY01000172.1	97	5642	5815	0	WP_082348522.1	W815_RS1000000127705	GCF_000507025.1	oxidoreductase	Aldo_ket_red	Xanthomonas oryzae pv. oryzicola MAI10	Bacteria; Proteobacteria; Gammaproteobacteria; Xanthomonadales; Xanthomonadaceae; Xanthomonas
NZ_AYSY01000172.1	97	5950	7035	0	WP_033004801.1	W815_RS0108365	GCF_000507025.1	DUF3396 domain-containing protein	DUF3396	Xanthomonas oryzae pv. oryzicola MAI10	Bacteria; Proteobacteria; Gammaproteobacteria; Xanthomonadales; Xanthomonadaceae; Xanthomonas
NZ_AYSY01000172.1	97	7032	8093	0	WP_024711189.1	W815_RS0108370	GCF_000507025.1	DUF3396 domain-containing protein	DUF3396	Xanthomonas oryzae pv. oryzicola MAI10	Bacteria; Proteobacteria; Gammaproteobacteria; Xanthomonadales; Xanthomonadaceae; Xanthomonas
NZ_AYSY01000172.1	97	8101	8796	1	WP_024711190.1	W815_RS0108375	GCF_000507025.1	VRR-NUC domain-containing protein	VRR_NUC	Xanthomonas oryzae pv. oryzicola MAI10	Bacteria; Proteobacteria; Gammaproteobacteria; Xanthomonadales; Xanthomonadaceae; Xanthomonas
NZ_AYSY01000172.1	97	8793	9377	0	WP_024711191.1	W815_RS01000000124180	GCF_000507025.1	PAAR domain-containing protein	PAAR_motif	Xanthomonas oryzae pv. oryzicola MAI10	Bacteria; Proteobacteria; Gammaproteobacteria; Xanthomonadales; Xanthomonadaceae; Xanthomonas
NZ_AYSY01000172.1	97	9743	12655	0	WP_024711192.1	W815_RS0108390	GCF_000507025.1	aminomethyl-transferring glycine dehydrogenase	GDC-P+GDC-P+TM	Xanthomonas oryzae pv. oryzicola MAI10	Bacteria; Proteobacteria; Gammaproteobacteria; Xanthomonadales; Xanthomonadaceae; Xanthomonas
NZ_AYSY01000172.1	97	13114	13296	0	WP_076342480.1	W815_RS1000000127715	GCF_000507025.1	RaxX family RiPP		Xanthomonas oryzae pv. oryzicola MAI10	Bacteria; Proteobacteria; Gammaproteobacteria; Xanthomonadales; Xanthomonadaceae; Xanthomonas
NZ_ALWI01000069.1	98	40516	41079	0	WP_081538742.1	B392_RS0126655	GCF_000297475.1	antirestriction protein	Antirestrict	Burkholderia pyrrocinia CH-67	Bacteria; Proteobacteria; Betaproteobacteria; Burkholderiales; Burkholderiaceae; Burkholderia; Burkholderia cepacia complex
NZ_ALWI01000069.1	98	41627	41902	0	WP_026045089.1	B392_RS0126660	GCF_000297475.1	transcriptional regulator		Burkholderia pyrrocinia CH-67	Bacteria; Proteobacteria; Betaproteobacteria; Burkholderiales; Burkholderiaceae; Burkholderia; Burkholderia cepacia complex
NZ_ALWI01000069.1	98	42973	43524	0	WP_026045090.1	B392_RS0126670	GCF_000297475.1	PAAR domain-containing protein	PAAR_motif	Burkholderia pyrrocinia CH-67	Bacteria; Proteobacteria; Betaproteobacteria; Burkholderiales; Burkholderiaceae; Burkholderia; Burkholderia cepacia complex
NZ_ALWI01000069.1	98	43521	44285	1	WP_026045091.1	B392_RS0126675	GCF_000297475.1	nuclease		Burkholderia pyrrocinia CH-67	Bacteria; Proteobacteria; Betaproteobacteria; Burkholderiales; Burkholderiaceae; Burkholderia; Burkholderia cepacia complex
NZ_ALWI01000069.1	98	44291	45397	0	WP_017333763.1	B392_RS0126680	GCF_000297475.1	DUF3396 domain-containing protein	DUF3396	Burkholderia pyrrocinia CH-67	Bacteria; Proteobacteria; Betaproteobacteria; Burkholderiales; Burkholderiaceae; Burkholderia; Burkholderia cepacia complex
NZ_ALWI01000069.1	98	45677	45916	0	WP_157791612.1	B392_RS0126685	GCF_000297475.1	hypothetical protein	SP	Burkholderia pyrrocinia CH-67	Bacteria; Proteobacteria; Betaproteobacteria; Burkholderiales; Burkholderiaceae; Burkholderia; Burkholderia cepacia complex
NZ_ALWI01000069.1	98	46102	46245	0	WP_157791613.1	B392_RS42915	GCF_000297475.1	hypothetical protein	SP+TM	Burkholderia pyrrocinia CH-67	Bacteria; Proteobacteria; Betaproteobacteria; Burkholderiales; Burkholderiaceae; Burkholderia; Burkholderia cepacia complex
NZ_CP007230.1	99	966376	967539	0	WP_025381539.1	BF17_RS04310	GCF_000582515.1	DUF3396 domain-containing protein	DUF3396	Yersinia similis	Bacteria; Proteobacteria; Gammaproteobacteria; Enterobacterales; Yersiniaceae; Yersinia
NZ_CP007230.1	99	967785	968054	0	WP_025381538.1	BF17_RS04315	GCF_000582515.1	PAAR domain-containing protein	PAAR_motif	Yersinia similis	Bacteria; Proteobacteria; Gammaproteobacteria; Enterobacterales; Yersiniaceae; Yersinia
NZ_CP007230.1	99	968051	969211	0	WP_025381540.1	BF17_RS04320	GCF_000582515.1	DUF3396 domain-containing protein	DUF3396	Yersinia similis	Bacteria; Proteobacteria; Gammaproteobacteria; Enterobacterales; Yersiniaceae; Yersinia
NZ_CP007230.1	99	969228	970577	1	WP_025381541.1	BF17_RS04325	GCF_000582515.1	VRR-NUC domain-containing protein	VRR_NUC+TM+TM	Yersinia similis	Bacteria; Proteobacteria; Gammaproteobacteria; Enterobacterales; Yersiniaceae; Yersinia
NZ_CP007230.1	99	970582	972744	0	WP_038402024.1	BF17_RS04330	GCF_000582515.1	type VI secretion system tip protein VgrG	Phage_GPD+Phage_base_V	Yersinia similis	Bacteria; Proteobacteria; Gammaproteobacteria; Enterobacterales; Yersiniaceae; Yersinia
NZ_CP007230.1	99	973157	973795	0	WP_025381542.1	BF17_RS04335	GCF_000582515.1	VWA domain-containing protein	VWA	Yersinia similis	Bacteria; Proteobacteria; Gammaproteobacteria; Enterobacterales; Yersiniaceae; Yersinia
NZ_CP007230.1	99	973908	974549	0	WP_025381543.1	BF17_RS04340	GCF_000582515.1	tellurium resistance TerZ family protein	TerD	Yersinia similis	Bacteria; Proteobacteria; Gammaproteobacteria; Enterobacterales; Yersiniaceae; Yersinia
NZ_CCCS020000038.1	100	6225	6833	0	WP_035193712.1	AFERRI_RS11910	GCF_000750615.1	uracil-DNA glycosylase family protein	UDG	Acidithiobacillus ferrivorans	Bacteria; Proteobacteria; Acidithiobacillia; Acidithiobacillales; Acidithiobacillaceae; Acidithiobacillus
NZ_CCCS020000038.1	100	7160	7513	0	WP_035193716.1	AFERRI_RS11920	GCF_000750615.1	hypothetical protein		Acidithiobacillus ferrivorans	Bacteria; Proteobacteria; Acidithiobacillia; Acidithiobacillales; Acidithiobacillaceae; Acidithiobacillus
NZ_CCCS020000038.1	100	7554	8555	0	WP_081919491.1	AFERRI_RS11925	GCF_000750615.1	DUF3396 domain-containing protein	DUF3396	Acidithiobacillus ferrivorans	Bacteria; Proteobacteria; Acidithiobacillia; Acidithiobacillales; Acidithiobacillaceae; Acidithiobacillus
NZ_CCCS020000038.1	100	8710	9087	1	WP_035193719.1	AFERRI_RS11930	GCF_000750615.1	VRR-NUC domain-containing protein	VRR_NUC	Acidithiobacillus ferrivorans	Bacteria; Proteobacteria; Acidithiobacillia; Acidithiobacillales; Acidithiobacillaceae; Acidithiobacillus
NZ_CCCS020000038.1	100	9494	10369	0	WP_035193721.1	AFERRI_RS11935	GCF_000750615.1	DUF4123 domain-containing protein	DUF4123	Acidithiobacillus ferrivorans	Bacteria; Proteobacteria; Acidithiobacillia; Acidithiobacillales; Acidithiobacillaceae; Acidithiobacillus
NZ_CCCS020000038.1	100	10731	10946	0	WP_014028860.1	AFERRI_RS11940	GCF_000750615.1	type II toxin-antitoxin system HicA family toxin	HicA_toxin	Acidithiobacillus ferrivorans	Bacteria; Proteobacteria; Acidithiobacillia; Acidithiobacillales; Acidithiobacillaceae; Acidithiobacillus
NZ_CCCS020000038.1	100	10943	11158	0	WP_014028859.1	AFERRI_RS11945	GCF_000750615.1	hypothetical protein	HicB_lk_antitox	Acidithiobacillus ferrivorans	Bacteria; Proteobacteria; Acidithiobacillia; Acidithiobacillales; Acidithiobacillaceae; Acidithiobacillus
NZ_JPWT01000084.1	101	23944	24570	0	WP_038750962.1	X946_RS19570	GCF_000773065.1	RdgB/HAM1 family non-canonical purine NTP pyrophosphatase	Ham1p_like	Burkholderia sp. ABCPW 111	Bacteria; Proteobacteria; Betaproteobacteria; Burkholderiales; Burkholderiaceae; Burkholderia
NZ_JPWT01000084.1	101	24567	25784	0	WP_038750963.1	X946_RS19575	GCF_000773065.1	radical SAM family heme chaperone HemW	Radical_SAM+HemN_C	Burkholderia sp. ABCPW 111	Bacteria; Proteobacteria; Betaproteobacteria; Burkholderiales; Burkholderiaceae; Burkholderia
NZ_JPWT01000084.1	101	26901	28019	0	WP_038750964.1	X946_RS19590	GCF_000773065.1	DUF3396 domain-containing protein	DUF3396	Burkholderia sp. ABCPW 111	Bacteria; Proteobacteria; Betaproteobacteria; Burkholderiales; Burkholderiaceae; Burkholderia
NZ_JPWT01000084.1	101	28025	28780	1	WP_038750966.1	X946_RS19595	GCF_000773065.1	VRR-NUC domain-containing protein	VRR_NUC	Burkholderia sp. ABCPW 111	Bacteria; Proteobacteria; Betaproteobacteria; Burkholderiales; Burkholderiaceae; Burkholderia
NZ_JPWT01000084.1	101	28777	29325	0	WP_038750967.1	X946_RS19600	GCF_000773065.1	PAAR domain-containing protein	PAAR_motif	Burkholderia sp. ABCPW 111	Bacteria; Proteobacteria; Betaproteobacteria; Burkholderiales; Burkholderiaceae; Burkholderia
NZ_JPWT01000084.1	101	30090	30413	0	WP_038750970.1	X946_RS19610	GCF_000773065.1	type II toxin-antitoxin system MqsR family toxin	MqsR_toxin	Burkholderia sp. ABCPW 111	Bacteria; Proteobacteria; Betaproteobacteria; Burkholderiales; Burkholderiaceae; Burkholderia
NZ_JPWT01000084.1	101	31404	32954	0	WP_038750972.1	X946_RS19620	GCF_000773065.1	cellulose biosynthesis protein BcsG	CBP_BcsG	Burkholderia sp. ABCPW 111	Bacteria; Proteobacteria; Betaproteobacteria; Burkholderiales; Burkholderiaceae; Burkholderia
NZ_JSFK01000012.1	102	105578	107260	0	WP_038363296.1	NZ35_RS14510	GCF_000783395.1	NAD(P)/FAD-dependent oxidoreductase	Amino_oxidase	Pseudomonas chlororaphis	Bacteria; Proteobacteria; Gammaproteobacteria; Pseudomonadales; Pseudomonadaceae; Pseudomonas
NZ_JSFK01000012.1	102	107484	107945	0	WP_038363402.1	NZ35_RS14515	GCF_000783395.1	Lrp/AsnC family transcriptional regulator	HTH_AsnC-type+AsnC_trans_reg	Pseudomonas chlororaphis	Bacteria; Proteobacteria; Gammaproteobacteria; Pseudomonadales; Pseudomonadaceae; Pseudomonas
NZ_JSFK01000012.1	102	108173	109261	0	WP_038363298.1	NZ35_RS14520	GCF_000783395.1	DUF3396 domain-containing protein	DUF3396	Pseudomonas chlororaphis	Bacteria; Proteobacteria; Gammaproteobacteria; Pseudomonadales; Pseudomonadaceae; Pseudomonas
NZ_JSFK01000012.1	102	109278	109976	1	WP_038363300.1	NZ35_RS14525	GCF_000783395.1	VRR-NUC domain-containing protein	VRR_NUC+TM	Pseudomonas chlororaphis	Bacteria; Proteobacteria; Gammaproteobacteria; Pseudomonadales; Pseudomonadaceae; Pseudomonas
NZ_JSFK01000012.1	102	109969	110481	0	WP_038363304.1	NZ35_RS14530	GCF_000783395.1	PAAR domain-containing protein	PAAR_motif+PAAR_motif	Pseudomonas chlororaphis	Bacteria; Proteobacteria; Gammaproteobacteria; Pseudomonadales; Pseudomonadaceae; Pseudomonas
NZ_JSFK01000012.1	102	110927	114673	0	WP_038363306.1	NZ35_RS14540	GCF_000783395.1	EAL domain-containing protein	SP+SBP_bac_3+TM+PAS_3+PAS_9+PAS_9+PAS_9+GGDEF+EAL	Pseudomonas chlororaphis	Bacteria; Proteobacteria; Gammaproteobacteria; Pseudomonadales; Pseudomonadaceae; Pseudomonas
NZ_JSFK01000012.1	102	114800	116644	0	WP_038363308.1	NZ35_RS14545	GCF_000783395.1	RNA polymerase sigma factor RpoD	Sigma70_r1_1+Sigma70_r1_2+Sigma70_ner+Sigma70_r2+Sigma70_r3+Sigma70_r4	Pseudomonas chlororaphis	Bacteria; Proteobacteria; Gammaproteobacteria; Pseudomonadales; Pseudomonadaceae; Pseudomonas
NZ_JQHP01000005.1	103	29382	30053	0	WP_005973527.1	JV38_RS10735	GCF_000749865.1	7-carboxy-7-deazaguanine synthase QueE	Fer4_14	Pectobacterium wasabiae	Bacteria; Proteobacteria; Gammaproteobacteria; Enterobacterales; Pectobacteriaceae; Pectobacterium
NZ_JQHP01000005.1	103	30244	31227	0	WP_005973530.1	JV38_RS10740	GCF_000749865.1	MBL fold metallo-hydrolase	SP+Lactamase_B	Pectobacterium wasabiae	Bacteria; Proteobacteria; Gammaproteobacteria; Enterobacterales; Pectobacteriaceae; Pectobacterium
NZ_JQHP01000005.1	103	31780	33957	0	WP_005973532.1	JV38_RS10745	GCF_000749865.1	type VI secretion system tip protein VgrG	Phage_GPD+Phage_base_V	Pectobacterium wasabiae	Bacteria; Proteobacteria; Gammaproteobacteria; Enterobacterales; Pectobacteriaceae; Pectobacterium
NZ_JQHP01000005.1	103	33950	35299	1	WP_039478283.1	JV38_RS10750	GCF_000749865.1	VRR-NUC domain-containing protein	VRR_NUC+TM+TM	Pectobacterium wasabiae	Bacteria; Proteobacteria; Gammaproteobacteria; Enterobacterales; Pectobacteriaceae; Pectobacterium
NZ_JQHP01000005.1	103	35318	36472	0	WP_039478286.1	JV38_RS10755	GCF_000749865.1	DUF3396 domain-containing protein	DUF3396	Pectobacterium wasabiae	Bacteria; Proteobacteria; Gammaproteobacteria; Enterobacterales; Pectobacteriaceae; Pectobacterium
NZ_JQHP01000005.1	103	36481	37635	0	WP_005974654.1	JV38_RS10760	GCF_000749865.1	DUF3396 domain-containing protein	DUF3396	Pectobacterium wasabiae	Bacteria; Proteobacteria; Gammaproteobacteria; Enterobacterales; Pectobacteriaceae; Pectobacterium
NZ_JQHP01000005.1	103	37632	37901	0	WP_005974656.1	JV38_RS10765	GCF_000749865.1	PAAR domain-containing protein	PAAR_motif	Pectobacterium wasabiae	Bacteria; Proteobacteria; Gammaproteobacteria; Enterobacterales; Pectobacteriaceae; Pectobacterium
NZ_JZWP02000003.1	104	175805	176698	0	WP_046082383.1	VL22_RS04750	GCF_000968885.2	PhzF family isomerase	PhzC-PhzF	Escherichia fergusonii	Bacteria; Proteobacteria; Gammaproteobacteria; Enterobacterales; Enterobacteriaceae; Escherichia
NZ_JZWP02000003.1	104	177389	177976	0	WP_046082384.1	VL22_RS04760	GCF_000968885.2	hypothetical protein		Escherichia fergusonii	Bacteria; Proteobacteria; Gammaproteobacteria; Enterobacterales; Enterobacteriaceae; Escherichia
NZ_JZWP02000003.1	104	177992	178981	0	WP_046082385.1	VL22_RS04765	GCF_000968885.2	DUF3396 domain-containing protein	DUF3396	Escherichia fergusonii	Bacteria; Proteobacteria; Gammaproteobacteria; Enterobacterales; Enterobacteriaceae; Escherichia
NZ_JZWP02000003.1	104	179011	179367	1	WP_046082386.1	VL22_RS04770	GCF_000968885.2	hypothetical protein		Escherichia fergusonii	Bacteria; Proteobacteria; Gammaproteobacteria; Enterobacterales; Enterobacteriaceae; Escherichia
NZ_JZWP02000003.1	104	180607	180918	0	WP_105223430.1	VL22_RS04785	GCF_000968885.2	hypothetical protein		Escherichia fergusonii	Bacteria; Proteobacteria; Gammaproteobacteria; Enterobacterales; Enterobacteriaceae; Escherichia
NZ_JZWP02000003.1	104	181054	181536	0	WP_046082388.1	VL22_RS04790	GCF_000968885.2	hypothetical protein		Escherichia fergusonii	Bacteria; Proteobacteria; Gammaproteobacteria; Enterobacterales; Enterobacteriaceae; Escherichia
NZ_JZWP02000003.1	104	181837	182193	0	WP_000750349.1	VL22_RS04795	GCF_000968885.2	hypothetical protein		Escherichia fergusonii	Bacteria; Proteobacteria; Gammaproteobacteria; Enterobacterales; Enterobacteriaceae; Escherichia
NZ_LBHW02000060.1	105	521	1579	0	WP_052946143.1	YH64_RS28085	GCF_001005835.2	DUF3396 domain-containing protein	DUF3396	Achromobacter sp. LC458	Bacteria; Proteobacteria; Betaproteobacteria; Burkholderiales; Alcaligenaceae; Achromobacter; unclassified Achromobacter
NZ_LBHW02000060.1	105	1606	2439	1	WP_046807700.1	YH64_RS28090	GCF_001005835.2	VRR-NUC domain-containing protein	SP+VRR_NUC	Achromobacter sp. LC458	Bacteria; Proteobacteria; Betaproteobacteria; Burkholderiales; Alcaligenaceae; Achromobacter; unclassified Achromobacter
NZ_LBHW02000060.1	105	2436	3512	0	WP_052946142.1	YH64_RS28095	GCF_001005835.2	DUF3396 domain-containing protein	DUF3396	Achromobacter sp. LC458	Bacteria; Proteobacteria; Betaproteobacteria; Burkholderiales; Alcaligenaceae; Achromobacter; unclassified Achromobacter
NZ_LBHW02000060.1	105	3590	4519	0	WP_046807699.1	YH64_RS28100	GCF_001005835.2	CysB family HTH-type transcriptional regulator	HTH_1+LysR_substrate	Achromobacter sp. LC458	Bacteria; Proteobacteria; Betaproteobacteria; Burkholderiales; Alcaligenaceae; Achromobacter; unclassified Achromobacter
NZ_LBHW02000060.1	105	4529	4879	0	WP_046807698.1	YH64_RS28105	GCF_001005835.2	hypothetical protein	Glyoxalase_6	Achromobacter sp. LC458	Bacteria; Proteobacteria; Betaproteobacteria; Burkholderiales; Alcaligenaceae; Achromobacter; unclassified Achromobacter
NZ_CQBK01000056.1	106	4347	4595	0	WP_145479959.1	AEB14_RS20110	GCF_001114105.1	hypothetical protein		Yersinia similis	Bacteria; Proteobacteria; Gammaproteobacteria; Enterobacterales; Yersiniaceae; Yersinia
NZ_CQBK01000056.1	106	4607	5632	0	WP_049601614.1	AEB14_RS20115	GCF_001114105.1	DUF2169 domain-containing protein	DUF2169	Yersinia similis	Bacteria; Proteobacteria; Gammaproteobacteria; Enterobacterales; Yersiniaceae; Yersinia
NZ_CQBK01000056.1	106	5629	6690	0	WP_049601617.1	AEB14_RS20120	GCF_001114105.1	hypothetical protein	SP	Yersinia similis	Bacteria; Proteobacteria; Gammaproteobacteria; Enterobacterales; Yersiniaceae; Yersinia
NZ_CQBK01000056.1	106	6684	7757	1	WP_049601620.1	AEB14_RS20125	GCF_001114105.1	DUF4150 domain-containing protein	DUF4150	Yersinia similis	Bacteria; Proteobacteria; Gammaproteobacteria; Enterobacterales; Yersiniaceae; Yersinia
NZ_CQBK01000056.1	106	7774	8754	0	WP_082153152.1	AEB14_RS24005	GCF_001114105.1	DUF3396 domain-containing protein	DUF3396	Yersinia similis	Bacteria; Proteobacteria; Gammaproteobacteria; Enterobacterales; Yersiniaceae; Yersinia
NZ_CQBK01000056.1	106	9074	10587	0	WP_156172469.1	AEB14_RS24010	GCF_001114105.1	IS3 family transposase	HTH_Tnp_1+HTH_Tnp_1+HTH_32+rve+rve_3	Yersinia similis	Bacteria; Proteobacteria; Gammaproteobacteria; Enterobacterales; Yersiniaceae; Yersinia
NZ_CQBK01000056.1	106	10636	10686	0	WP_072081501.1	AEB14_RS23665	GCF_001114105.1	hypothetical protein		Yersinia similis	Bacteria; Proteobacteria; Gammaproteobacteria; Enterobacterales; Yersiniaceae; Yersinia
NZ_LFJJ01000201.1	107	4230	4985	0	WP_050455492.1	BVER_RS24520	GCF_001189365.1	hypothetical protein		Candidatus Burkholderia verschuerenii	Bacteria; Proteobacteria; Betaproteobacteria; Burkholderiales; Burkholderiaceae; Burkholderia
NZ_LFJJ01000201.1	107	5377	5583	0	WP_157056208.1	BVER_RS24525	GCF_001189365.1	hypothetical protein		Candidatus Burkholderia verschuerenii	Bacteria; Proteobacteria; Betaproteobacteria; Burkholderiales; Burkholderiaceae; Burkholderia
NZ_LFJJ01000201.1	107	6938	7417	0	WP_050455495.1	BVER_RS24540	GCF_001189365.1	hypothetical protein		Candidatus Burkholderia verschuerenii	Bacteria; Proteobacteria; Betaproteobacteria; Burkholderiales; Burkholderiaceae; Burkholderia
NZ_LFJJ01000201.1	107	7414	8502	1	WP_050455496.1	BVER_RS24545	GCF_001189365.1	VRR-NUC domain-containing protein	VRR_NUC	Candidatus Burkholderia verschuerenii	Bacteria; Proteobacteria; Betaproteobacteria; Burkholderiales; Burkholderiaceae; Burkholderia
NZ_LFJJ01000201.1	107	8556	9218	0	WP_050455497.1	BVER_RS24550	GCF_001189365.1	hypothetical protein		Candidatus Burkholderia verschuerenii	Bacteria; Proteobacteria; Betaproteobacteria; Burkholderiales; Burkholderiaceae; Burkholderia
NZ_LFJJ01000201.1	107	9230	9979	0	WP_157056209.1	BVER_RS24555	GCF_001189365.1	hypothetical protein	TM	Candidatus Burkholderia verschuerenii	Bacteria; Proteobacteria; Betaproteobacteria; Burkholderiales; Burkholderiaceae; Burkholderia
NZ_JADZ01000013.1	108	1	2321	0	WP_157462799.1	L880_RS32210	GCF_000518645.1	type VI secretion system tip protein VgrG	Phage_GPD+Phage_base_V+Gp5_C	Curvibacter gracilis ATCC BAA-807	Bacteria; Proteobacteria; Betaproteobacteria; Burkholderiales; Comamonadaceae; Curvibacter
NZ_JADZ01000013.1	108	2336	2698	0	WP_027475708.1	L880_RS0110915	GCF_000518645.1	PAAR domain-containing protein	PAAR_motif+PAAR_motif	Curvibacter gracilis ATCC BAA-807	Bacteria; Proteobacteria; Betaproteobacteria; Burkholderiales; Comamonadaceae; Curvibacter
NZ_JADZ01000013.1	108	2700	3311	0	WP_051443248.1	L880_RS32215	GCF_000518645.1	DUF4123 domain-containing protein	DUF4123	Curvibacter gracilis ATCC BAA-807	Bacteria; Proteobacteria; Betaproteobacteria; Burkholderiales; Comamonadaceae; Curvibacter
NZ_JADZ01000013.1	108	3734	4522	1	WP_051443249.1	L880_RS32220	GCF_000518645.1	hypothetical protein	VRR_NUC	Curvibacter gracilis ATCC BAA-807	Bacteria; Proteobacteria; Betaproteobacteria; Burkholderiales; Comamonadaceae; Curvibacter
NZ_JADZ01000013.1	108	4614	5702	0	WP_027475710.1	L880_RS0110935	GCF_000518645.1	DUF3396 domain-containing protein	DUF3396	Curvibacter gracilis ATCC BAA-807	Bacteria; Proteobacteria; Betaproteobacteria; Burkholderiales; Comamonadaceae; Curvibacter
NZ_JADZ01000013.1	108	6171	6818	0	WP_084461257.1	L880_RS0110945	GCF_000518645.1	DUF3396 domain-containing protein	DUF3396	Curvibacter gracilis ATCC BAA-807	Bacteria; Proteobacteria; Betaproteobacteria; Burkholderiales; Comamonadaceae; Curvibacter
NZ_JADZ01000013.1	108	6846	7559	0	WP_157462801.1	L880_RS34365	GCF_000518645.1	hypothetical protein		Curvibacter gracilis ATCC BAA-807	Bacteria; Proteobacteria; Betaproteobacteria; Burkholderiales; Comamonadaceae; Curvibacter
NZ_KK211050.1	109	222509	223555	0	WP_027705819.1	Q387_RS0109795	GCF_000620025.1	ribonucleotide-diphosphate reductase subunit beta	Ribonuc_red_sm	Zymobacter palmae DSM 10491	Bacteria; Proteobacteria; Gammaproteobacteria; Oceanospirillales; Halomonadaceae; Zymobacter group; Zymobacter
NZ_KK211050.1	109	223697	225310	0	WP_038278938.1	Q387_RS0109800	GCF_000620025.1	peptide chain release factor 3	GTP_EFTU+GTP_EFTU_D2+RF3_C	Zymobacter palmae DSM 10491	Bacteria; Proteobacteria; Gammaproteobacteria; Oceanospirillales; Halomonadaceae; Zymobacter group; Zymobacter
NZ_KK211050.1	109	225665	226759	0	WP_027705821.1	Q387_RS0109805	GCF_000620025.1	DUF3396 domain-containing protein	TM+DUF3396	Zymobacter palmae DSM 10491	Bacteria; Proteobacteria; Gammaproteobacteria; Oceanospirillales; Halomonadaceae; Zymobacter group; Zymobacter
NZ_KK211050.1	109	226774	227667	1	WP_051524073.1	Q387_RS16065	GCF_000620025.1	VRR-NUC domain-containing protein	VRR_NUC+TM	Zymobacter palmae DSM 10491	Bacteria; Proteobacteria; Gammaproteobacteria; Oceanospirillales; Halomonadaceae; Zymobacter group; Zymobacter
NZ_KK211050.1	109	226774	227667	1	WP_051524073.1	Q387_RS16065	GCF_000620025.1	VRR-NUC domain-containing protein	VRR_NUC+TM	Zymobacter palmae DSM 10491	Bacteria; Proteobacteria; Gammaproteobacteria; Oceanospirillales; Halomonadaceae; Zymobacter group; Zymobacter
NZ_KK211050.1	109	227671	228225	0	WP_038278940.1	Q387_RS0109815	GCF_000620025.1	PAAR domain-containing protein	PAAR_motif	Zymobacter palmae DSM 10491	Bacteria; Proteobacteria; Gammaproteobacteria; Oceanospirillales; Halomonadaceae; Zymobacter group; Zymobacter
NZ_KK211050.1	109	228468	228728	0	WP_027705823.1	Q387_RS0109820	GCF_000620025.1	hypothetical protein		Zymobacter palmae DSM 10491	Bacteria; Proteobacteria; Gammaproteobacteria; Oceanospirillales; Halomonadaceae; Zymobacter group; Zymobacter
NZ_KK211050.1	109	229179	230438	0	WP_027705824.1	Q387_RS0109825	GCF_000620025.1	allantoate amidohydrolase	Peptidase_M20	Zymobacter palmae DSM 10491	Bacteria; Proteobacteria; Gammaproteobacteria; Oceanospirillales; Halomonadaceae; Zymobacter group; Zymobacter
NZ_JONK01000005.1	110	28460	28780	0	WP_208854834.1	BR71_RS03860	GCF_000711885.1	helix-turn-helix domain-containing protein	HTH_3	Chromobacterium haemolyticum DSM 19808	Bacteria; Proteobacteria; Betaproteobacteria; Neisseriales; Chromobacteriaceae; Chromobacterium
NZ_JONK01000005.1	110	28905	29426	0	WP_208854835.1	BR71_RS03865	GCF_000711885.1	hypothetical protein	DSPc	Chromobacterium haemolyticum DSM 19808	Bacteria; Proteobacteria; Betaproteobacteria; Neisseriales; Chromobacteriaceae; Chromobacterium
NZ_JONK01000005.1	110	29692	32544	0	WP_081862539.1	BR71_RS03870	GCF_000711885.1	type VI secretion system tip protein VgrG	SP+Phage_GPD+Phage_base_V+T6SS_Vgr+DUF2345	Chromobacterium haemolyticum DSM 19808	Bacteria; Proteobacteria; Betaproteobacteria; Neisseriales; Chromobacteriaceae; Chromobacterium
NZ_JONK01000005.1	110	32544	33722	1	WP_052370314.1	BR71_RS03875	GCF_000711885.1	VRR-NUC domain-containing protein	VRR_NUC+TM+TM	Chromobacterium haemolyticum DSM 19808	Bacteria; Proteobacteria; Betaproteobacteria; Neisseriales; Chromobacteriaceae; Chromobacterium
NZ_JONK01000005.1	110	33738	34916	0	WP_052370315.1	BR71_RS03880	GCF_000711885.1	DUF3396 domain-containing protein	DUF3396	Chromobacterium haemolyticum DSM 19808	Bacteria; Proteobacteria; Betaproteobacteria; Neisseriales; Chromobacteriaceae; Chromobacterium
NZ_JONK01000005.1	110	35245	39804	0	WP_043632951.1	BR71_RS03885	GCF_000711885.1	AAA family ATPase	AAA_30+AAA_11+AAA_12+MTES_1575	Chromobacterium haemolyticum DSM 19808	Bacteria; Proteobacteria; Betaproteobacteria; Neisseriales; Chromobacteriaceae; Chromobacterium
NZ_JONK01000005.1	110	39873	40967	0	WP_052370316.1	BR71_RS03890	GCF_000711885.1	DUF4236 domain-containing protein	DUF4236+NMN_transporter	Chromobacterium haemolyticum DSM 19808	Bacteria; Proteobacteria; Betaproteobacteria; Neisseriales; Chromobacteriaceae; Chromobacterium
NZ_FO818638.1	111	62367	62888	0	WP_155399220.1	XBW1_RS25005	GCF_000973125.1	CPBP family intramembrane metalloprotease	SP+TM+Rce1-like	Xenorhabdus bovienii	Bacteria; Proteobacteria; Gammaproteobacteria; Enterobacterales; Morganellaceae; Xenorhabdus
NZ_FO818638.1	111	63147	63416	0	WP_046338211.1	XBW1_RS21710	GCF_000973125.1	PAAR domain-containing protein	PAAR_motif	Xenorhabdus bovienii	Bacteria; Proteobacteria; Gammaproteobacteria; Enterobacterales; Morganellaceae; Xenorhabdus
NZ_FO818638.1	111	63400	64629	0	WP_046338212.1	XBW1_RS21715	GCF_000973125.1	DUF3396 domain-containing protein	DUF3396	Xenorhabdus bovienii	Bacteria; Proteobacteria; Gammaproteobacteria; Enterobacterales; Morganellaceae; Xenorhabdus
NZ_FO818638.1	111	64619	66193	1	WP_052726132.1	XBW1_RS22635	GCF_000973125.1	VRR-NUC domain-containing protein	VRR_NUC+TM+TM	Xenorhabdus bovienii	Bacteria; Proteobacteria; Gammaproteobacteria; Enterobacterales; Morganellaceae; Xenorhabdus
NZ_FO818638.1	111	66190	68229	0	WP_082243394.1	XBW1_RS21725	GCF_000973125.1	type VI secretion system tip protein VgrG	Phage_GPD+Phage_base_V+Gp5_C	Xenorhabdus bovienii	Bacteria; Proteobacteria; Gammaproteobacteria; Enterobacterales; Morganellaceae; Xenorhabdus
NZ_FO818638.1	111	68254	68960	0	WP_155399055.1	XBW1_RS24250	GCF_000973125.1	IS1 family transposase	Zn_Tnp_IS1+HTH_Tnp_IS1+DDE_Tnp_IS1	Xenorhabdus bovienii	Bacteria; Proteobacteria; Gammaproteobacteria; Enterobacterales; Morganellaceae; Xenorhabdus
NZ_FO818638.1	111	69158	71896	0	WP_046338213.1	XBW1_RS21740	GCF_000973125.1	DUF927 domain-containing protein	Prim_Zn_Ribbon+Toprim_3+DUF927	Xenorhabdus bovienii	Bacteria; Proteobacteria; Gammaproteobacteria; Enterobacterales; Morganellaceae; Xenorhabdus
NZ_BCBL01000015.1	112	21179	22009	0	WP_054907059.1	APH38_RS04710	GCF_001320705.1	ABC transporter permease	TM+BPD_transp_1	Pseudomonas sp. NBRC 111135	Bacteria; Proteobacteria; Gammaproteobacteria; Pseudomonadales; Pseudomonadaceae; Pseudomonas
NZ_BCBL01000015.1	112	22014	22859	0	WP_054907060.1	APH38_RS04715	GCF_001320705.1	ABC transporter ATP-binding protein	ABC_tran	Pseudomonas sp. NBRC 111135	Bacteria; Proteobacteria; Gammaproteobacteria; Pseudomonadales; Pseudomonadaceae; Pseudomonas
NZ_BCBL01000015.1	112	23250	23789	0	WP_065348209.1	APH38_RS33295	GCF_001320705.1	PAAR domain-containing protein	PAAR_motif	Pseudomonas sp. NBRC 111135	Bacteria; Proteobacteria; Gammaproteobacteria; Pseudomonadales; Pseudomonadaceae; Pseudomonas
NZ_BCBL01000015.1	112	23786	24490	1	WP_054907061.1	APH38_RS04725	GCF_001320705.1	VRR-NUC domain-containing protein	VRR_NUC	Pseudomonas sp. NBRC 111135	Bacteria; Proteobacteria; Gammaproteobacteria; Pseudomonadales; Pseudomonadaceae; Pseudomonas
NZ_BCBL01000015.1	112	24508	25626	0	WP_054907062.1	APH38_RS04730	GCF_001320705.1	DUF3396 domain-containing protein	DUF3396	Pseudomonas sp. NBRC 111135	Bacteria; Proteobacteria; Gammaproteobacteria; Pseudomonadales; Pseudomonadaceae; Pseudomonas
NZ_BCBL01000015.1	112	25814	29749	0	WP_054907063.1	APH38_RS04735	GCF_001320705.1	trifunctional transcriptional regulator/proline dehydrogenase/L-glutamate gamma-semialdehyde dehydrogenase	PRODH+Pro_dh-DNA_bdg+Pro_dh+Aldedh	Pseudomonas sp. NBRC 111135	Bacteria; Proteobacteria; Gammaproteobacteria; Pseudomonadales; Pseudomonadaceae; Pseudomonas
NZ_BCBL01000015.1	112	30049	30384	0	WP_054907064.1	APH38_RS04740	GCF_001320705.1	helix-turn-helix transcriptional regulator	HxlR	Pseudomonas sp. NBRC 111135	Bacteria; Proteobacteria; Gammaproteobacteria; Pseudomonadales; Pseudomonadaceae; Pseudomonas
NZ_LMCY01000005.1	113	36730	37632	0	WP_162251792.1	ASC93_RS04375	GCF_001425685.1	hypothetical protein	SP+PA14	Massilia sp. Root335	Bacteria; Proteobacteria; Betaproteobacteria; Burkholderiales; Oxalobacteraceae; Massilia
NZ_LMCY01000005.1	113	37676	38575	0	WP_056437666.1	ASC93_RS04380	GCF_001425685.1	NAD(P)-dependent oxidoreductase	NAD_binding_2+NAD_binding_11	Massilia sp. Root335	Bacteria; Proteobacteria; Betaproteobacteria; Burkholderiales; Oxalobacteraceae; Massilia
NZ_LMCY01000005.1	113	38737	39321	0	WP_056437669.1	ASC93_RS04385	GCF_001425685.1	PAAR domain-containing protein	PAAR_motif	Massilia sp. Root335	Bacteria; Proteobacteria; Betaproteobacteria; Burkholderiales; Oxalobacteraceae; Massilia
NZ_LMCY01000005.1	113	39324	40313	1	WP_056437672.1	ASC93_RS04390	GCF_001425685.1	hypothetical protein	TM	Massilia sp. Root335	Bacteria; Proteobacteria; Betaproteobacteria; Burkholderiales; Oxalobacteraceae; Massilia
NZ_LMCY01000005.1	113	40310	41554	0	WP_082547765.1	ASC93_RS29435	GCF_001425685.1	DUF3396 domain-containing protein	DUF3396	Massilia sp. Root335	Bacteria; Proteobacteria; Betaproteobacteria; Burkholderiales; Oxalobacteraceae; Massilia
NZ_LMCY01000005.1	113	41608	42615	0	WP_056437677.1	ASC93_RS04400	GCF_001425685.1	CapA family protein	PGA_cap	Massilia sp. Root335	Bacteria; Proteobacteria; Betaproteobacteria; Burkholderiales; Oxalobacteraceae; Massilia
NZ_LMCY01000005.1	113	42617	43255	0	WP_056437680.1	ASC93_RS04405	GCF_001425685.1	dienelactone hydrolase family protein	DLH	Massilia sp. Root335	Bacteria; Proteobacteria; Betaproteobacteria; Burkholderiales; Oxalobacteraceae; Massilia
NZ_LMDW01000018.1	114	147093	147620	0	WP_082519677.1	ASC92_RS22590	GCF_001425205.1	formate dehydrogenase subunit gamma	2Fe-2S_thioredx	Variovorax sp. Root411	Bacteria; Proteobacteria; Betaproteobacteria; Burkholderiales; Comamonadaceae; Variovorax
NZ_LMDW01000018.1	114	147917	149251	0	WP_082519678.1	ASC92_RS22595	GCF_001425205.1	oxalate/formate MFS antiporter	MFS_1+MFS_1	Variovorax sp. Root411	Bacteria; Proteobacteria; Betaproteobacteria; Burkholderiales; Comamonadaceae; Variovorax
NZ_LMDW01000018.1	114	149875	152469	0	WP_082519679.1	ASC92_RS22605	GCF_001425205.1	type VI secretion system tip protein VgrG	Phage_GPD+Phage_base_V+T6SS_Vgr+DUF2345	Variovorax sp. Root411	Bacteria; Proteobacteria; Betaproteobacteria; Burkholderiales; Comamonadaceae; Variovorax
NZ_LMDW01000018.1	114	152490	153722	1	WP_056520386.1	ASC92_RS22610	GCF_001425205.1	VRR-NUC domain-containing protein	VRR_NUC+TM+TM	Variovorax sp. Root411	Bacteria; Proteobacteria; Betaproteobacteria; Burkholderiales; Comamonadaceae; Variovorax
NZ_LMDW01000018.1	114	156559	156720	0	WP_200936020.1	ASC92_RS29115	GCF_001425205.1	hypothetical protein	TM	Variovorax sp. Root411	Bacteria; Proteobacteria; Betaproteobacteria; Burkholderiales; Comamonadaceae; Variovorax
NZ_LMDW01000018.1	114	156763	157710	0	WP_056520251.1	ASC92_RS22625	GCF_001425205.1	LysR family transcriptional regulator	HTH_1+LysR_substrate	Variovorax sp. Root411	Bacteria; Proteobacteria; Betaproteobacteria; Burkholderiales; Comamonadaceae; Variovorax
NZ_LMDW01000018.1	114	157728	159149	0	WP_056520253.1	ASC92_RS22630	GCF_001425205.1	pyruvate kinase	PK+PK_C	Variovorax sp. Root411	Bacteria; Proteobacteria; Betaproteobacteria; Burkholderiales; Comamonadaceae; Variovorax
NZ_CP013729.1	115	2952114	2953214	0	WP_058935172.1	RD2015_RS12555	GCF_001483865.1	ABC transporter substrate-binding protein	SP+Peripla_BP_6	Roseateles depolymerans	Bacteria; Proteobacteria; Betaproteobacteria; Burkholderiales; Roseateles
NZ_CP013729.1	115	2953410	2954195	0	WP_147307061.1	RD2015_RS12560	GCF_001483865.1	DUF2007 domain-containing protein	DUF2007+TM+TM+TM+TM	Roseateles depolymerans	Bacteria; Proteobacteria; Betaproteobacteria; Burkholderiales; Roseateles
NZ_CP013729.1	115	2954316	2955305	0	WP_083525586.1	RD2015_RS24405	GCF_001483865.1	DUF3396 domain-containing protein	DUF3396	Roseateles depolymerans	Bacteria; Proteobacteria; Betaproteobacteria; Burkholderiales; Roseateles
NZ_CP013729.1	115	2955335	2956384	1	WP_058935174.1	RD2015_RS12570	GCF_001483865.1	DUF4150 domain-containing protein	DUF4150	Roseateles depolymerans	Bacteria; Proteobacteria; Betaproteobacteria; Burkholderiales; Roseateles
NZ_CP013729.1	115	2956375	2957520	0	WP_058935175.1	RD2015_RS12575	GCF_001483865.1	hypothetical protein	SP	Roseateles depolymerans	Bacteria; Proteobacteria; Betaproteobacteria; Burkholderiales; Roseateles
NZ_CP013729.1	115	2957517	2958581	0	WP_058935176.1	RD2015_RS12580	GCF_001483865.1	DUF2169 domain-containing protein	DUF2169	Roseateles depolymerans	Bacteria; Proteobacteria; Betaproteobacteria; Burkholderiales; Roseateles
NZ_CP013729.1	115	2958591	2958878	0	WP_198165055.1	RD2015_RS12585	GCF_001483865.1	hypothetical protein		Roseateles depolymerans	Bacteria; Proteobacteria; Betaproteobacteria; Burkholderiales; Roseateles
NZ_LN865164.1	116	3908195	3908914	0	WP_144435235.1	PSHI_RS17505	GCF_001511775.1	serine/threonine-protein phosphatase	PP2C_2	Pseudomonas sp. URMO17WK12:I11	Bacteria; Proteobacteria; Gammaproteobacteria; Pseudomonadales; Pseudomonadaceae; Pseudomonas
NZ_LN865164.1	116	3908911	3909903	0	WP_059183830.1	PSHI_RS17510	GCF_001511775.1	serine/threonine protein kinase	Pkinase	Pseudomonas sp. URMO17WK12:I11	Bacteria; Proteobacteria; Gammaproteobacteria; Pseudomonadales; Pseudomonadaceae; Pseudomonas
NZ_LN865164.1	116	3909890	3912133	0	WP_082693197.1	PSHI_RS17515	GCF_001511775.1	type VI secretion system tip protein VgrG	Phage_GPD+Phage_base_V+DUF2345	Pseudomonas sp. URMO17WK12:I11	Bacteria; Proteobacteria; Gammaproteobacteria; Pseudomonadales; Pseudomonadaceae; Pseudomonas
NZ_LN865164.1	116	3912149	3913402	1	WP_059183831.1	PSHI_RS17520	GCF_001511775.1	VRR-NUC domain-containing protein	VRR_NUC+TM+TM	Pseudomonas sp. URMO17WK12:I11	Bacteria; Proteobacteria; Gammaproteobacteria; Pseudomonadales; Pseudomonadaceae; Pseudomonas
NZ_LN865164.1	116	3913414	3914529	0	WP_059183832.1	PSHI_RS17525	GCF_001511775.1	DUF3396 domain-containing protein	DUF3396	Pseudomonas sp. URMO17WK12:I11	Bacteria; Proteobacteria; Gammaproteobacteria; Pseudomonadales; Pseudomonadaceae; Pseudomonas
NZ_LN865164.1	116	3914620	3914829	0	WP_059183833.1	PSHI_RS22370	GCF_001511775.1	hypothetical protein		Pseudomonas sp. URMO17WK12:I11	Bacteria; Proteobacteria; Gammaproteobacteria; Pseudomonadales; Pseudomonadaceae; Pseudomonas
NZ_LN865164.1	116	3915353	3916246	0	WP_059184153.1	PSHI_RS17535	GCF_001511775.1	hypothetical protein		Pseudomonas sp. URMO17WK12:I11	Bacteria; Proteobacteria; Gammaproteobacteria; Pseudomonadales; Pseudomonadaceae; Pseudomonas
NZ_LOYE01000058.1	117	40192	41415	0	WP_059715451.1	WJ41_RS11830	GCF_001524745.1	integrase arm-type DNA-binding domain-containing protein	Arm-DNA-bind_3+Phage_integrase	Burkholderia ubonensis	Bacteria; Proteobacteria; Betaproteobacteria; Burkholderiales; Burkholderiaceae; Burkholderia; Burkholderia cepacia complex
NZ_LOYE01000058.1	117	41747	42004	0	WP_059645427.1	WJ41_RS11840	GCF_001524745.1	hypothetical protein		Burkholderia ubonensis	Bacteria; Proteobacteria; Betaproteobacteria; Burkholderiales; Burkholderiaceae; Burkholderia; Burkholderia cepacia complex
NZ_LOYE01000058.1	117	42221	42769	0	WP_059715421.1	WJ41_RS11845	GCF_001524745.1	PAAR domain-containing protein	PAAR_motif	Burkholderia ubonensis	Bacteria; Proteobacteria; Betaproteobacteria; Burkholderiales; Burkholderiaceae; Burkholderia; Burkholderia cepacia complex
NZ_LOYE01000058.1	117	42766	43545	1	WP_059715422.1	WJ41_RS11850	GCF_001524745.1	hypothetical protein	VRR_NUC	Burkholderia ubonensis	Bacteria; Proteobacteria; Betaproteobacteria; Burkholderiales; Burkholderiaceae; Burkholderia; Burkholderia cepacia complex
NZ_LOYE01000058.1	117	43551	44663	0	WP_059715423.1	WJ41_RS11855	GCF_001524745.1	DUF3396 domain-containing protein	DUF3396	Burkholderia ubonensis	Bacteria; Proteobacteria; Betaproteobacteria; Burkholderiales; Burkholderiaceae; Burkholderia; Burkholderia cepacia complex
NZ_LOYE01000058.1	117	44784	44996	0	WP_157634181.1	WJ41_RS11860	GCF_001524745.1	hypothetical protein		Burkholderia ubonensis	Bacteria; Proteobacteria; Betaproteobacteria; Burkholderiales; Burkholderiaceae; Burkholderia; Burkholderia cepacia complex
NZ_LOYE01000058.1	117	45105	45335	0	WP_063801005.1	WJ41_RS11865	GCF_001524745.1	DUF4224 domain-containing protein	DUF4224	Burkholderia ubonensis	Bacteria; Proteobacteria; Betaproteobacteria; Burkholderiales; Burkholderiaceae; Burkholderia; Burkholderia cepacia complex
NZ_LOYP01000005.1	118	144492	145007	0	WP_059830763.1	WS96_RS03825	GCF_001526365.1	GNAT family N-acetyltransferase	Acetyltransf_1	Burkholderia sp. MSMB1835	Bacteria; Proteobacteria; Betaproteobacteria; Burkholderiales; Burkholderiaceae; Burkholderia
NZ_LOYP01000005.1	118	146231	147133	0	WP_059830765.1	WS96_RS03830	GCF_001526365.1	HNH endonuclease	HNH_2	Burkholderia sp. MSMB1835	Bacteria; Proteobacteria; Betaproteobacteria; Burkholderiales; Burkholderiaceae; Burkholderia
NZ_LOYP01000005.1	118	147411	147941	0	WP_059830766.1	WS96_RS03835	GCF_001526365.1	PAAR domain-containing protein	PAAR_motif	Burkholderia sp. MSMB1835	Bacteria; Proteobacteria; Betaproteobacteria; Burkholderiales; Burkholderiaceae; Burkholderia
NZ_LOYP01000005.1	118	147938	148669	1	WP_059830768.1	WS96_RS03840	GCF_001526365.1	VRR-NUC domain-containing protein	VRR_NUC	Burkholderia sp. MSMB1835	Bacteria; Proteobacteria; Betaproteobacteria; Burkholderiales; Burkholderiaceae; Burkholderia
NZ_LOYP01000005.1	118	148684	149799	0	WP_059830770.1	WS96_RS03845	GCF_001526365.1	DUF3396 domain-containing protein	DUF3396	Burkholderia sp. MSMB1835	Bacteria; Proteobacteria; Betaproteobacteria; Burkholderiales; Burkholderiaceae; Burkholderia
NZ_LOYP01000005.1	118	150195	150758	0	WP_059830771.1	WS96_RS03850	GCF_001526365.1	TIR domain-containing protein	DUF1863	Burkholderia sp. MSMB1835	Bacteria; Proteobacteria; Betaproteobacteria; Burkholderiales; Burkholderiaceae; Burkholderia
NZ_LOYP01000005.1	118	150791	151627	0	WP_059830773.1	WS96_RS03855	GCF_001526365.1	DUF6430 domain-containing protein	TM+TM+DUF6430	Burkholderia sp. MSMB1835	Bacteria; Proteobacteria; Betaproteobacteria; Burkholderiales; Burkholderiaceae; Burkholderia
NZ_LPDA01000029.1	119	4353	4787	0	WP_196486216.1	WK40_RS06330	GCF_001528685.1	PIN domain-containing protein	PIN	Burkholderia cepacia	Bacteria; Proteobacteria; Betaproteobacteria; Burkholderiales; Burkholderiaceae; Burkholderia; Burkholderia cepacia complex
NZ_LPDA01000029.1	119	4809	5135	0	WP_155634242.1	WK40_RS40040	GCF_001528685.1	hypothetical protein		Burkholderia cepacia	Bacteria; Proteobacteria; Betaproteobacteria; Burkholderiales; Burkholderiaceae; Burkholderia; Burkholderia cepacia complex
NZ_LPDA01000029.1	119	5258	5788	0	WP_060074279.1	WK40_RS06335	GCF_001528685.1	PAAR domain-containing protein	PAAR_motif	Burkholderia cepacia	Bacteria; Proteobacteria; Betaproteobacteria; Burkholderiales; Burkholderiaceae; Burkholderia; Burkholderia cepacia complex
NZ_LPDA01000029.1	119	5785	6525	1	WP_060074281.1	WK40_RS06340	GCF_001528685.1	VRR-NUC domain-containing protein	VRR_NUC	Burkholderia cepacia	Bacteria; Proteobacteria; Betaproteobacteria; Burkholderiales; Burkholderiaceae; Burkholderia; Burkholderia cepacia complex
NZ_LPDA01000029.1	119	5785	6525	1	WP_060074281.1	WK40_RS06340	GCF_001528685.1	VRR-NUC domain-containing protein	VRR_NUC	Burkholderia cepacia	Bacteria; Proteobacteria; Betaproteobacteria; Burkholderiales; Burkholderiaceae; Burkholderia; Burkholderia cepacia complex
NZ_LPDA01000029.1	119	6531	7616	0	WP_060074285.1	WK40_RS06345	GCF_001528685.1	DUF3396 domain-containing protein	DUF3396	Burkholderia cepacia	Bacteria; Proteobacteria; Betaproteobacteria; Burkholderiales; Burkholderiaceae; Burkholderia; Burkholderia cepacia complex
NZ_LPDA01000029.1	119	7633	8184	0	WP_060074283.1	WK40_RS06350	GCF_001528685.1	hypothetical protein		Burkholderia cepacia	Bacteria; Proteobacteria; Betaproteobacteria; Burkholderiales; Burkholderiaceae; Burkholderia; Burkholderia cepacia complex
NZ_LPDA01000029.1	119	8385	9659	0	WP_155638149.1	WK40_RS40045	GCF_001528685.1	hypothetical protein		Burkholderia cepacia	Bacteria; Proteobacteria; Betaproteobacteria; Burkholderiales; Burkholderiaceae; Burkholderia; Burkholderia cepacia complex
NZ_LPLE01000085.1	120	3521	3703	0	WP_124482838.1	WT75_RS28935	GCF_001533495.1	hypothetical protein		Burkholderia stagnalis	Bacteria; Proteobacteria; Betaproteobacteria; Burkholderiales; Burkholderiaceae; Burkholderia; Burkholderia cepacia complex
NZ_LPLE01000085.1	120	3910	4737	0	WP_059803039.1	WT75_RS28940	GCF_001533495.1	sulfite exporter TauE/SafE family protein	TauE	Burkholderia stagnalis	Bacteria; Proteobacteria; Betaproteobacteria; Burkholderiales; Burkholderiaceae; Burkholderia; Burkholderia cepacia complex
NZ_LPLE01000085.1	120	5046	5573	0	WP_060350486.1	WT75_RS28945	GCF_001533495.1	PAAR domain-containing protein	PAAR_motif	Burkholderia stagnalis	Bacteria; Proteobacteria; Betaproteobacteria; Burkholderiales; Burkholderiaceae; Burkholderia; Burkholderia cepacia complex
NZ_LPLE01000085.1	120	5570	6298	1	WP_060350487.1	WT75_RS28950	GCF_001533495.1	VRR-NUC domain-containing protein	VRR_NUC	Burkholderia stagnalis	Bacteria; Proteobacteria; Betaproteobacteria; Burkholderiales; Burkholderiaceae; Burkholderia; Burkholderia cepacia complex
NZ_LPLE01000085.1	120	6308	7423	0	WP_060350488.1	WT75_RS28955	GCF_001533495.1	DUF3396 domain-containing protein	DUF3396	Burkholderia stagnalis	Bacteria; Proteobacteria; Betaproteobacteria; Burkholderiales; Burkholderiaceae; Burkholderia; Burkholderia cepacia complex
NZ_LPLE01000085.1	120	7539	8582	0	WP_081080844.1	WT75_RS34620	GCF_001533495.1	DNA cytosine methyltransferase	DNA_methylase	Burkholderia stagnalis	Bacteria; Proteobacteria; Betaproteobacteria; Burkholderiales; Burkholderiaceae; Burkholderia; Burkholderia cepacia complex
NZ_LPLE01000085.1	120	8610	10601	0	WP_060350489.1	WT75_RS28960	GCF_001533495.1	ATP-binding protein	HATPase_c_3	Burkholderia stagnalis	Bacteria; Proteobacteria; Betaproteobacteria; Burkholderiales; Burkholderiaceae; Burkholderia; Burkholderia cepacia complex
NZ_LASA01000057.1	121	59127	60113	0	WP_062263044.1	WG89_RS06465	GCF_001562015.1	DMT family transporter	EamA+TM+EamA	Endozoicomonas arenosclerae	Bacteria; Proteobacteria; Gammaproteobacteria; Oceanospirillales; Endozoicomonadaceae; Endozoicomonas
NZ_LASA01000057.1	121	60236	61021	0	WP_079253692.1	WG89_RS06470	GCF_001562015.1	transporter substrate-binding domain-containing protein	SP+SBP_bac_3	Endozoicomonas arenosclerae	Bacteria; Proteobacteria; Gammaproteobacteria; Oceanospirillales; Endozoicomonadaceae; Endozoicomonas
NZ_LASA01000057.1	121	61213	62418	0	WP_079253693.1	WG89_RS06475	GCF_001562015.1	PatB family C-S lyase	Aminotran_1_2	Endozoicomonas arenosclerae	Bacteria; Proteobacteria; Gammaproteobacteria; Oceanospirillales; Endozoicomonadaceae; Endozoicomonas
NZ_LASA01000057.1	121	62489	63289	1	WP_062263054.1	WG89_RS06480	GCF_001562015.1	VRR-NUC domain-containing protein	VRR_NUC	Endozoicomonas arenosclerae	Bacteria; Proteobacteria; Gammaproteobacteria; Oceanospirillales; Endozoicomonadaceae; Endozoicomonas
NZ_LASA01000057.1	121	63310	64242	0	WP_062263057.1	WG89_RS06485	GCF_001562015.1	DUF3396 domain-containing protein	DUF3396	Endozoicomonas arenosclerae	Bacteria; Proteobacteria; Gammaproteobacteria; Oceanospirillales; Endozoicomonadaceae; Endozoicomonas
NZ_LASA01000057.1	121	64484	66670	0	WP_079253694.1	WG89_RS06490	GCF_001562015.1	5-histidylcysteine sulfoxide synthase	DinB_2+FGE-sulfatase+Methyltransf_23	Endozoicomonas arenosclerae	Bacteria; Proteobacteria; Gammaproteobacteria; Oceanospirillales; Endozoicomonadaceae; Endozoicomonas
NZ_LASA01000057.1	121	66841	67371	0	WP_062263062.1	WG89_RS06495	GCF_001562015.1	hypothetical protein	SP	Endozoicomonas arenosclerae	Bacteria; Proteobacteria; Gammaproteobacteria; Oceanospirillales; Endozoicomonadaceae; Endozoicomonas
NZ_LXGI01000075.1	122	207465	208706	0	WP_065061026.1	A6456_RS19225	GCF_001673675.1	extracellular solute-binding protein	SBP_bac_8	Paraburkholderia tropica	Bacteria; Proteobacteria; Betaproteobacteria; Burkholderiales; Burkholderiaceae; Paraburkholderia
NZ_LXGI01000075.1	122	209120	209473	0	WP_156773775.1	A6456_RS19230	GCF_001673675.1	hypothetical protein		Paraburkholderia tropica	Bacteria; Proteobacteria; Betaproteobacteria; Burkholderiales; Burkholderiaceae; Paraburkholderia
NZ_LXGI01000075.1	122	210498	211832	0	WP_065060879.1	A6456_RS19235	GCF_001673675.1	DUF3396 domain-containing protein	DUF3396+DUF3396	Paraburkholderia tropica	Bacteria; Proteobacteria; Betaproteobacteria; Burkholderiales; Burkholderiaceae; Paraburkholderia
NZ_LXGI01000075.1	122	211896	213158	1	WP_065060880.1	A6456_RS19240	GCF_001673675.1	VRR-NUC domain-containing protein	VRR_NUC+TM+TM	Paraburkholderia tropica	Bacteria; Proteobacteria; Betaproteobacteria; Burkholderiales; Burkholderiaceae; Paraburkholderia
NZ_LXGI01000075.1	122	211896	213158	1	WP_065060880.1	A6456_RS19240	GCF_001673675.1	VRR-NUC domain-containing protein	VRR_NUC+TM+TM	Paraburkholderia tropica	Bacteria; Proteobacteria; Betaproteobacteria; Burkholderiales; Burkholderiaceae; Paraburkholderia
NZ_LXGI01000075.1	122	213211	215988	0	WP_065060881.1	A6456_RS19245	GCF_001673675.1	type VI secretion system tip protein VgrG	Phage_GPD+Phage_base_V+T6SS_Vgr+DUF2345	Paraburkholderia tropica	Bacteria; Proteobacteria; Betaproteobacteria; Burkholderiales; Burkholderiaceae; Paraburkholderia
NZ_LXGI01000075.1	122	216229	216969	0	WP_065060882.1	A6456_RS19250	GCF_001673675.1	transporter substrate-binding domain-containing protein	SBP_bac_3	Paraburkholderia tropica	Bacteria; Proteobacteria; Betaproteobacteria; Burkholderiales; Burkholderiaceae; Paraburkholderia
NZ_LXGI01000075.1	122	216992	217720	0	WP_065060883.1	A6456_RS19255	GCF_001673675.1	FCD domain-containing protein	GntR+FCD	Paraburkholderia tropica	Bacteria; Proteobacteria; Betaproteobacteria; Burkholderiales; Burkholderiaceae; Paraburkholderia
NZ_LOIC01000055.1	123	14400	15080	0	WP_065390184.1	Phpb_RS09840	GCF_001684335.1	ribulose-phosphate 3-epimerase	Ribul_P_3_epim	Photorhabdus namnaonensis	Bacteria; Proteobacteria; Gammaproteobacteria; Enterobacterales; Morganellaceae; Photorhabdus
NZ_LOIC01000055.1	123	15070	15774	0	WP_065390185.1	Phpb_RS09845	GCF_001684335.1	phosphoglycolate phosphatase	HAD_2	Photorhabdus namnaonensis	Bacteria; Proteobacteria; Gammaproteobacteria; Enterobacterales; Morganellaceae; Photorhabdus
NZ_LOIC01000055.1	123	15779	16816	0	WP_065390186.1	Phpb_RS09850	GCF_001684335.1	tryptophan--tRNA ligase	tRNA-synt_1b	Photorhabdus namnaonensis	Bacteria; Proteobacteria; Gammaproteobacteria; Enterobacterales; Morganellaceae; Photorhabdus
NZ_LOIC01000055.1	123	18646	20004	1	WP_065390188.1	Phpb_RS09860	GCF_001684335.1	VRR-NUC domain-containing protein	VRR_NUC+TM+TM	Photorhabdus namnaonensis	Bacteria; Proteobacteria; Gammaproteobacteria; Enterobacterales; Morganellaceae; Photorhabdus
NZ_LOIC01000055.1	123	20007	22124	0	WP_065390189.1	Phpb_RS09865	GCF_001684335.1	type VI secretion system tip protein VgrG	Phage_GPD+Phage_base_V+Gp5_C	Photorhabdus namnaonensis	Bacteria; Proteobacteria; Gammaproteobacteria; Enterobacterales; Morganellaceae; Photorhabdus
NZ_LOIC01000055.1	123	22832	23125	0	WP_065390190.1	Phpb_RS09870	GCF_001684335.1	DUF2282 domain-containing protein	SP+DUF2282	Photorhabdus namnaonensis	Bacteria; Proteobacteria; Gammaproteobacteria; Enterobacterales; Morganellaceae; Photorhabdus
NZ_LOIC01000055.1	123	23153	24076	0	WP_065390191.1	Phpb_RS09875	GCF_001684335.1	DUF692 domain-containing protein	DUF692	Photorhabdus namnaonensis	Bacteria; Proteobacteria; Gammaproteobacteria; Enterobacterales; Morganellaceae; Photorhabdus
NZ_CP015110.1	124	1502275	1502946	0	WP_067658226.1	AMD27_RS07030	GCF_001612555.1	hypothetical protein		Acinetobacter sp. TGL-Y2	Bacteria; Proteobacteria; Gammaproteobacteria; Moraxellales; Moraxellaceae; Acinetobacter
NZ_CP015110.1	124	1503126	1503326	0	WP_067662843.1	AMD27_RS07035	GCF_001612555.1	hypothetical protein		Acinetobacter sp. TGL-Y2	Bacteria; Proteobacteria; Gammaproteobacteria; Moraxellales; Moraxellaceae; Acinetobacter
NZ_CP015110.1	124	1503386	1504486	0	WP_067658228.1	AMD27_RS07040	GCF_001612555.1	DUF3396 domain-containing protein	DUF3396	Acinetobacter sp. TGL-Y2	Bacteria; Proteobacteria; Gammaproteobacteria; Moraxellales; Moraxellaceae; Acinetobacter
NZ_CP015110.1	124	1504498	1505235	1	WP_067658230.1	AMD27_RS07045	GCF_001612555.1	VRR-NUC domain-containing protein	VRR_NUC	Acinetobacter sp. TGL-Y2	Bacteria; Proteobacteria; Gammaproteobacteria; Moraxellales; Moraxellaceae; Acinetobacter
NZ_CP015110.1	124	1505228	1505758	0	WP_067658233.1	AMD27_RS07050	GCF_001612555.1	PAAR domain-containing protein	PAAR_motif	Acinetobacter sp. TGL-Y2	Bacteria; Proteobacteria; Gammaproteobacteria; Moraxellales; Moraxellaceae; Acinetobacter
NZ_CP015110.1	124	1506044	1506289	0	WP_067658236.1	AMD27_RS07055	GCF_001612555.1	hypothetical protein		Acinetobacter sp. TGL-Y2	Bacteria; Proteobacteria; Gammaproteobacteria; Moraxellales; Moraxellaceae; Acinetobacter
NZ_CP015110.1	124	1506397	1506576	0	WP_067658239.1	AMD27_RS07060	GCF_001612555.1	hypothetical protein		Acinetobacter sp. TGL-Y2	Bacteria; Proteobacteria; Gammaproteobacteria; Moraxellales; Moraxellaceae; Acinetobacter
NZ_FQUH01000007.1	125	114065	114667	0	WP_072958194.1	BUA91_RS08865	GCF_900129185.1	XTP/dITP diphosphatase	Ham1p_like	Vibrio gazogenes DSM 21264 = NBRC 103151	Bacteria; Proteobacteria; Gammaproteobacteria; Vibrionales; Vibrionaceae; Vibrio
NZ_FQUH01000007.1	125	115157	117220	0	WP_072958196.1	BUA91_RS08870	GCF_900129185.1	type VI secretion system tip protein VgrG	Phage_GPD+Phage_base_V	Vibrio gazogenes DSM 21264 = NBRC 103151	Bacteria; Proteobacteria; Gammaproteobacteria; Vibrionales; Vibrionaceae; Vibrio
NZ_FQUH01000007.1	125	117745	118686	0	WP_072958198.1	BUA91_RS08880	GCF_900129185.1	DUF4123 domain-containing protein	DUF4123	Vibrio gazogenes DSM 21264 = NBRC 103151	Bacteria; Proteobacteria; Gammaproteobacteria; Vibrionales; Vibrionaceae; Vibrio
NZ_FQUH01000007.1	125	118683	119528	1	WP_072958199.1	BUA91_RS08885	GCF_900129185.1	VRR-NUC domain-containing protein	VRR_NUC	Vibrio gazogenes DSM 21264 = NBRC 103151	Bacteria; Proteobacteria; Gammaproteobacteria; Vibrionales; Vibrionaceae; Vibrio
NZ_FQUH01000007.1	125	118683	119528	1	WP_072958199.1	BUA91_RS08885	GCF_900129185.1	VRR-NUC domain-containing protein	VRR_NUC	Vibrio gazogenes DSM 21264 = NBRC 103151	Bacteria; Proteobacteria; Gammaproteobacteria; Vibrionales; Vibrionaceae; Vibrio
NZ_FQUH01000007.1	125	119601	120512	0	WP_072958201.1	BUA91_RS08890	GCF_900129185.1	DUF3396 domain-containing protein	DUF3396	Vibrio gazogenes DSM 21264 = NBRC 103151	Bacteria; Proteobacteria; Gammaproteobacteria; Vibrionales; Vibrionaceae; Vibrio
NZ_FQUH01000007.1	125	120540	120917	0	WP_072958203.1	BUA91_RS08895	GCF_900129185.1	hypothetical protein		Vibrio gazogenes DSM 21264 = NBRC 103151	Bacteria; Proteobacteria; Gammaproteobacteria; Vibrionales; Vibrionaceae; Vibrio
NZ_FQUH01000007.1	125	120920	121834	0	WP_072958205.1	BUA91_RS08900	GCF_900129185.1	DUF4123 domain-containing protein	DUF4123	Vibrio gazogenes DSM 21264 = NBRC 103151	Bacteria; Proteobacteria; Gammaproteobacteria; Vibrionales; Vibrionaceae; Vibrio
NZ_FRAB01000097.1	126	1	956	0	WP_073432971.1	BUE39_RS33545	GCF_900142195.1	DUF3396 domain-containing protein	DUF3396+DUF3396	Paraburkholderia terricola	Bacteria; Proteobacteria; Betaproteobacteria; Burkholderiales; Burkholderiaceae; Paraburkholderia
NZ_FRAB01000097.1	126	1004	2248	1	WP_073432970.1	BUE39_RS33550	GCF_900142195.1	VRR-NUC domain-containing protein	VRR_NUC+TM+TM	Paraburkholderia terricola	Bacteria; Proteobacteria; Betaproteobacteria; Burkholderiales; Burkholderiaceae; Paraburkholderia
NZ_FRAB01000097.1	126	2270	3144	0	WP_143169546.1	BUE39_RS33555	GCF_900142195.1	DUF2345 domain-containing protein	DUF2345	Paraburkholderia terricola	Bacteria; Proteobacteria; Betaproteobacteria; Burkholderiales; Burkholderiaceae; Paraburkholderia
NZ_FRFG01000012.1	127	64281	64742	0	WP_073580108.1	VQ7734_RS04690	GCF_900143745.1	RES family NAD+ phosphorylase	RES	Vibrio quintilis	Bacteria; Proteobacteria; Gammaproteobacteria; Vibrionales; Vibrionaceae; Vibrio
NZ_FRFG01000012.1	127	65047	65559	0	WP_083601528.1	VQ7734_RS04695	GCF_900143745.1	PAAR domain-containing protein	PAAR_motif	Vibrio quintilis	Bacteria; Proteobacteria; Gammaproteobacteria; Vibrionales; Vibrionaceae; Vibrio
NZ_FRFG01000012.1	127	65572	66513	0	WP_073580109.1	VQ7734_RS04700	GCF_900143745.1	DUF4123 domain-containing protein	DUF4123	Vibrio quintilis	Bacteria; Proteobacteria; Gammaproteobacteria; Vibrionales; Vibrionaceae; Vibrio
NZ_FRFG01000012.1	127	66510	67367	1	WP_073580110.1	VQ7734_RS04705	GCF_900143745.1	VRR-NUC domain-containing protein	VRR_NUC	Vibrio quintilis	Bacteria; Proteobacteria; Gammaproteobacteria; Vibrionales; Vibrionaceae; Vibrio
NZ_FRFG01000012.1	127	66510	67367	1	WP_073580110.1	VQ7734_RS04705	GCF_900143745.1	VRR-NUC domain-containing protein	VRR_NUC	Vibrio quintilis	Bacteria; Proteobacteria; Gammaproteobacteria; Vibrionales; Vibrionaceae; Vibrio
NZ_FRFG01000012.1	127	67386	68333	0	WP_073580111.1	VQ7734_RS04710	GCF_900143745.1	DUF3396 domain-containing protein	DUF3396	Vibrio quintilis	Bacteria; Proteobacteria; Gammaproteobacteria; Vibrionales; Vibrionaceae; Vibrio
NZ_FRFG01000012.1	127	68378	68812	0	WP_073580112.1	VQ7734_RS04715	GCF_900143745.1	hypothetical protein		Vibrio quintilis	Bacteria; Proteobacteria; Gammaproteobacteria; Vibrionales; Vibrionaceae; Vibrio
NZ_FRFG01000012.1	127	68961	71135	0	WP_143169225.1	VQ7734_RS04720	GCF_900143745.1	phosphate acetyltransferase	AAA_26+DRTGG+PTA_PTB	Vibrio quintilis	Bacteria; Proteobacteria; Gammaproteobacteria; Vibrionales; Vibrionaceae; Vibrio
NZ_FSRU01000002.1	128	3122923	3125772	0	WP_074301162.1	BUS12_RS31060	GCF_900142845.1	type VI secretion system tip protein VgrG	Phage_GPD+Phage_base_V+T6SS_Vgr+DUF2345	Paraburkholderia phenazinium	Bacteria; Proteobacteria; Betaproteobacteria; Burkholderiales; Burkholderiaceae; Paraburkholderia
NZ_FSRU01000002.1	128	3126139	3126666	0	WP_074301163.1	BUS12_RS31065	GCF_900142845.1	DUF1566 domain-containing protein	SP+DUF1566	Paraburkholderia phenazinium	Bacteria; Proteobacteria; Betaproteobacteria; Burkholderiales; Burkholderiaceae; Paraburkholderia
NZ_FSRU01000002.1	128	3126782	3128116	0	WP_074301164.1	BUS12_RS31070	GCF_900142845.1	DUF3396 domain-containing protein	DUF3396+DUF3396	Paraburkholderia phenazinium	Bacteria; Proteobacteria; Betaproteobacteria; Burkholderiales; Burkholderiaceae; Paraburkholderia
NZ_FSRU01000002.1	128	3128155	3129468	1	WP_074301165.1	BUS12_RS31075	GCF_900142845.1	VRR-NUC domain-containing protein	VRR_NUC+TM+TM+TM	Paraburkholderia phenazinium	Bacteria; Proteobacteria; Betaproteobacteria; Burkholderiales; Burkholderiaceae; Paraburkholderia
NZ_FSRU01000002.1	128	3129494	3132253	0	WP_074301166.1	BUS12_RS31080	GCF_900142845.1	type VI secretion system tip protein VgrG	Phage_GPD+Phage_base_V+T6SS_Vgr+DUF2345	Paraburkholderia phenazinium	Bacteria; Proteobacteria; Betaproteobacteria; Burkholderiales; Burkholderiaceae; Paraburkholderia
NZ_FSRU01000002.1	128	3132501	3133556	0	WP_143788504.1	BUS12_RS31085	GCF_900142845.1	hypothetical protein	SP	Paraburkholderia phenazinium	Bacteria; Proteobacteria; Betaproteobacteria; Burkholderiales; Burkholderiaceae; Paraburkholderia
NZ_FSRU01000002.1	128	3133848	3134222	0	WP_143788505.1	BUS12_RS38475	GCF_900142845.1	hypothetical protein		Paraburkholderia phenazinium	Bacteria; Proteobacteria; Betaproteobacteria; Burkholderiales; Burkholderiaceae; Paraburkholderia
NZ_QAXT01000017.1	129	18401	18700	0	WP_076486467.1	C8J27_RS17935	GCF_003053525.1	PAAR domain-containing protein	PAAR_motif	Rhodobacter aestuarii	Bacteria; Proteobacteria; Alphaproteobacteria; Rhodobacterales; Rhodobacteraceae; Rhodobacter
NZ_QAXT01000017.1	129	18801	19517	0	WP_076486466.1	C8J27_RS17940	GCF_003053525.1	DUF1851 domain-containing protein	GAD-like+DUF1851	Rhodobacter aestuarii	Bacteria; Proteobacteria; Alphaproteobacteria; Rhodobacterales; Rhodobacteraceae; Rhodobacter
NZ_QAXT01000017.1	129	19547	20263	0	WP_076486465.1	C8J27_RS17945	GCF_003053525.1	DUF1851 domain-containing protein	GAD-like+DUF1851	Rhodobacter aestuarii	Bacteria; Proteobacteria; Alphaproteobacteria; Rhodobacterales; Rhodobacteraceae; Rhodobacter
NZ_QAXT01000017.1	129	20303	20605	1	WP_076486464.1	C8J27_RS17950	GCF_003053525.1	hypothetical protein		Rhodobacter aestuarii	Bacteria; Proteobacteria; Alphaproteobacteria; Rhodobacterales; Rhodobacteraceae; Rhodobacter
NZ_QAXT01000017.1	129	20616	20780	0	WP_175610482.1	C8J27_RS18625	GCF_003053525.1	hypothetical protein		Rhodobacter aestuarii	Bacteria; Proteobacteria; Alphaproteobacteria; Rhodobacterales; Rhodobacteraceae; Rhodobacter
NZ_QAXT01000017.1	129	20848	21597	0	WP_076486463.1	C8J27_RS17955	GCF_003053525.1	DUF3396 domain-containing protein	DUF3396	Rhodobacter aestuarii	Bacteria; Proteobacteria; Alphaproteobacteria; Rhodobacterales; Rhodobacteraceae; Rhodobacter
NZ_QAXT01000017.1	129	21779	22003	0	WP_076486462.1	C8J27_RS17960	GCF_003053525.1	hypothetical protein		Rhodobacter aestuarii	Bacteria; Proteobacteria; Alphaproteobacteria; Rhodobacterales; Rhodobacteraceae; Rhodobacter
NZ_MXLD01000008.1	130	7417	8346	0	WP_079773730.1	AJH78_RS15355	GCF_002033765.1	DUF3396 domain-containing protein	DUF3396	Salmonella bongori serovar 48:a:-	Bacteria; Proteobacteria; Gammaproteobacteria; Enterobacterales; Enterobacteriaceae; Salmonella
NZ_MXLD01000008.1	130	8413	8919	0	WP_079774701.1	AJH78_RS15360	GCF_002033765.1	hypothetical protein		Salmonella bongori serovar 48:a:-	Bacteria; Proteobacteria; Gammaproteobacteria; Enterobacterales; Enterobacteriaceae; Salmonella
NZ_MXLD01000008.1	130	8929	9402	0	WP_079774702.1	AJH78_RS15365	GCF_002033765.1	DUF3396 domain-containing protein	DUF3396	Salmonella bongori serovar 48:a:-	Bacteria; Proteobacteria; Gammaproteobacteria; Enterobacterales; Enterobacteriaceae; Salmonella
NZ_MXLD01000008.1	130	9723	10121	1	WP_079774703.1	AJH78_RS15370	GCF_002033765.1	hypothetical protein		Salmonella bongori serovar 48:a:-	Bacteria; Proteobacteria; Gammaproteobacteria; Enterobacterales; Enterobacteriaceae; Salmonella
NZ_MXLD01000008.1	130	10134	11120	0	WP_079774704.1	AJH78_RS15375	GCF_002033765.1	DUF3396 domain-containing protein	DUF3396	Salmonella bongori serovar 48:a:-	Bacteria; Proteobacteria; Gammaproteobacteria; Enterobacterales; Enterobacteriaceae; Salmonella
NZ_MXLD01000008.1	130	11135	12157	0	WP_079773728.1	AJH78_RS15380	GCF_002033765.1	DUF2169 domain-containing protein	DUF2169	Salmonella bongori serovar 48:a:-	Bacteria; Proteobacteria; Gammaproteobacteria; Enterobacterales; Enterobacteriaceae; Salmonella
NZ_MXLD01000008.1	130	12154	13209	0	WP_079774705.1	AJH78_RS15385	GCF_002033765.1	hypothetical protein	SP	Salmonella bongori serovar 48:a:-	Bacteria; Proteobacteria; Gammaproteobacteria; Enterobacterales; Enterobacteriaceae; Salmonella
NZ_JYMX01000024.1	131	40713	42482	0	WP_080324404.1	UE95_RS15340	GCF_002071875.1	terminase ATPase subunit family protein	Terminase_5+Terminase_6N+Terminase_6C	Burkholderia cenocepacia	Bacteria; Proteobacteria; Betaproteobacteria; Burkholderiales; Burkholderiaceae; Burkholderia; Burkholderia cepacia complex
NZ_JYMX01000024.1	131	42479	43534	0	WP_080324403.1	UE95_RS15345	GCF_002071875.1	phage portal protein	SP+Phage_portal	Burkholderia cenocepacia	Bacteria; Proteobacteria; Betaproteobacteria; Burkholderiales; Burkholderiaceae; Burkholderia; Burkholderia cepacia complex
NZ_JYMX01000024.1	131	43935	45044	0	WP_080324402.1	UE95_RS15350	GCF_002071875.1	DUF3396 domain-containing protein	DUF3396	Burkholderia cenocepacia	Bacteria; Proteobacteria; Betaproteobacteria; Burkholderiales; Burkholderiaceae; Burkholderia; Burkholderia cepacia complex
NZ_JYMX01000024.1	131	45050	45826	1	WP_080324401.1	UE95_RS15355	GCF_002071875.1	nuclease	VRR_NUC	Burkholderia cenocepacia	Bacteria; Proteobacteria; Betaproteobacteria; Burkholderiales; Burkholderiaceae; Burkholderia; Burkholderia cepacia complex
NZ_JYMX01000024.1	131	45823	46362	0	WP_080324400.1	UE95_RS15360	GCF_002071875.1	PAAR domain-containing protein	PAAR_motif	Burkholderia cenocepacia	Bacteria; Proteobacteria; Betaproteobacteria; Burkholderiales; Burkholderiaceae; Burkholderia; Burkholderia cepacia complex
NZ_JYMX01000024.1	131	46880	48490	0	WP_080324398.1	UE95_RS15370	GCF_002071875.1	TIGR04222 domain-containing membrane protein	TM+DUF2207+TM	Burkholderia cenocepacia	Bacteria; Proteobacteria; Betaproteobacteria; Burkholderiales; Burkholderiaceae; Burkholderia; Burkholderia cepacia complex
NZ_JYMX01000024.1	131	48752	49492	0	WP_080324397.1	UE95_RS15375	GCF_002071875.1	acetyltransferase	Hexapep	Burkholderia cenocepacia	Bacteria; Proteobacteria; Betaproteobacteria; Burkholderiales; Burkholderiaceae; Burkholderia; Burkholderia cepacia complex
NZ_KN151085.1	132	41687	42091	0	WP_013699758.1	LA03_RS29760	GCF_000757585.1	PaaI family thioesterase	4HBT	Burkholderia gladioli	Bacteria; Proteobacteria; Betaproteobacteria; Burkholderiales; Burkholderiaceae; Burkholderia
NZ_KN151085.1	132	42752	43576	0	WP_080757543.1	LA03_RS38680	GCF_000757585.1	hypothetical protein		Burkholderia gladioli	Bacteria; Proteobacteria; Betaproteobacteria; Burkholderiales; Burkholderiaceae; Burkholderia
NZ_KN151085.1	132	43596	44039	0	WP_080757544.1	LA03_RS38685	GCF_000757585.1	hypothetical protein	Glyco_hydro_38N	Burkholderia gladioli	Bacteria; Proteobacteria; Betaproteobacteria; Burkholderiales; Burkholderiaceae; Burkholderia
NZ_KN151085.1	132	44493	45245	1	WP_080757545.1	LA03_RS38690	GCF_000757585.1	VRR-NUC domain-containing protein	VRR_NUC	Burkholderia gladioli	Bacteria; Proteobacteria; Betaproteobacteria; Burkholderiales; Burkholderiaceae; Burkholderia
NZ_KN151085.1	132	45268	46482	0	WP_036039167.1	LA03_RS29770	GCF_000757585.1	DUF3396 domain-containing protein	DUF3396	Burkholderia gladioli	Bacteria; Proteobacteria; Betaproteobacteria; Burkholderiales; Burkholderiaceae; Burkholderia
NZ_KN151085.1	132	46613	47089	0	WP_124093552.1	LA03_RS39895	GCF_000757585.1	hypothetical protein		Burkholderia gladioli	Bacteria; Proteobacteria; Betaproteobacteria; Burkholderiales; Burkholderiaceae; Burkholderia
NZ_KN151085.1	132	47392	49005	0	WP_036039170.1	LA03_RS29780	GCF_000757585.1	glutamate--cysteine ligase	Glu_cys_ligase	Burkholderia gladioli	Bacteria; Proteobacteria; Betaproteobacteria; Burkholderiales; Burkholderiaceae; Burkholderia
NZ_LDSL01000149.1	133	1	554	0	WP_153012962.1	NS331_RS21130	GCF_001476815.1	DUF2345 domain-containing protein	DUF2345	Pseudacidovorax intermedius	Bacteria; Proteobacteria; Betaproteobacteria; Burkholderiales; Comamonadaceae; Pseudacidovorax
NZ_LDSL01000149.1	133	573	1871	1	WP_082702665.1	NS331_RS21135	GCF_001476815.1	VRR-NUC domain-containing protein	VRR_NUC+TM+TM	Pseudacidovorax intermedius	Bacteria; Proteobacteria; Betaproteobacteria; Burkholderiales; Comamonadaceae; Pseudacidovorax
NZ_LDSL01000149.1	133	1895	3229	0	WP_082702669.1	NS331_RS21140	GCF_001476815.1	DUF3396 domain-containing protein	DUF3396+DUF3396	Pseudacidovorax intermedius	Bacteria; Proteobacteria; Betaproteobacteria; Burkholderiales; Comamonadaceae; Pseudacidovorax
NZ_LDSL01000149.1	133	3250	4584	0	WP_153012963.1	NS331_RS21145	GCF_001476815.1	DUF3396 domain-containing protein	DUF3396+DUF3396	Pseudacidovorax intermedius	Bacteria; Proteobacteria; Betaproteobacteria; Burkholderiales; Comamonadaceae; Pseudacidovorax
NZ_LDSL01000149.1	133	4825	6516	0	WP_058643922.1	NS331_RS21150	GCF_001476815.1	MHS family MFS transporter	Sugar_tr+Sugar_tr+Sugar_tr	Pseudacidovorax intermedius	Bacteria; Proteobacteria; Betaproteobacteria; Burkholderiales; Comamonadaceae; Pseudacidovorax
NZ_MWJQ01000011.1	134	26341	27450	0	WP_227470962.1	B2G74_RS35490	GCF_002087245.1	hypothetical protein	Glyco_hydro_108+PG_binding_3+TM+TM+TM	Burkholderia sp. A27	Bacteria; Proteobacteria; Betaproteobacteria; Burkholderiales; Burkholderiaceae; Burkholderia
NZ_MWJQ01000011.1	134	27579	28370	0	WP_083086721.1	B2G74_RS32815	GCF_002087245.1	DNA adenine methylase	MethyltransfD12	Burkholderia sp. A27	Bacteria; Proteobacteria; Betaproteobacteria; Burkholderiales; Burkholderiaceae; Burkholderia
NZ_MWJQ01000011.1	134	28508	29626	0	WP_083086723.1	B2G74_RS32820	GCF_002087245.1	DUF3396 domain-containing protein	DUF3396	Burkholderia sp. A27	Bacteria; Proteobacteria; Betaproteobacteria; Burkholderiales; Burkholderiaceae; Burkholderia
NZ_MWJQ01000011.1	134	29635	30381	1	WP_083086724.1	B2G74_RS32825	GCF_002087245.1	VRR-NUC domain-containing protein	VRR_NUC	Burkholderia sp. A27	Bacteria; Proteobacteria; Betaproteobacteria; Burkholderiales; Burkholderiaceae; Burkholderia
NZ_MWJQ01000011.1	134	30378	30914	0	WP_083086726.1	B2G74_RS32830	GCF_002087245.1	PAAR domain-containing protein	PAAR_motif	Burkholderia sp. A27	Bacteria; Proteobacteria; Betaproteobacteria; Burkholderiales; Burkholderiaceae; Burkholderia
NZ_MWJQ01000011.1	134	31349	32554	0	WP_083086728.1	B2G74_RS32835	GCF_002087245.1	hypothetical protein		Burkholderia sp. A27	Bacteria; Proteobacteria; Betaproteobacteria; Burkholderiales; Burkholderiaceae; Burkholderia
NZ_MWJQ01000011.1	134	32631	33920	0	WP_083086730.1	B2G74_RS32840	GCF_002087245.1	hypothetical protein		Burkholderia sp. A27	Bacteria; Proteobacteria; Betaproteobacteria; Burkholderiales; Burkholderiaceae; Burkholderia
NZ_BAYA01000013.1	135	6825	7451	0	WP_167336026.1	BBA01S_RS46875	GCF_000685015.1	hypothetical protein	SP	Paraburkholderia bannensis NBRC 103871	Bacteria; Proteobacteria; Betaproteobacteria; Burkholderiales; Burkholderiaceae; Paraburkholderia
NZ_BAYA01000013.1	135	7378	7836	0	WP_156966001.1	BBA01S_RS46880	GCF_000685015.1	hypothetical protein	Glyco_hydro_19	Paraburkholderia bannensis NBRC 103871	Bacteria; Proteobacteria; Betaproteobacteria; Burkholderiales; Burkholderiaceae; Paraburkholderia
NZ_BAYA01000013.1	135	7845	9026	0	WP_027818016.1	BBA01S_RS20010	GCF_000685015.1	DUF3396 domain-containing protein	DUF3396	Paraburkholderia bannensis NBRC 103871	Bacteria; Proteobacteria; Betaproteobacteria; Burkholderiales; Burkholderiaceae; Paraburkholderia
NZ_BAYA01000013.1	135	9035	9466	1	WP_084162358.1	BBA01S_RS41875	GCF_000685015.1	VRR-NUC domain-containing protein	VRR_NUC	Paraburkholderia bannensis NBRC 103871	Bacteria; Proteobacteria; Betaproteobacteria; Burkholderiales; Burkholderiaceae; Paraburkholderia
NZ_BAYA01000013.1	135	10034	10732	0	WP_027818017.1	BBA01S_RS20025	GCF_000685015.1	hypothetical protein		Paraburkholderia bannensis NBRC 103871	Bacteria; Proteobacteria; Betaproteobacteria; Burkholderiales; Burkholderiaceae; Paraburkholderia
NZ_BAYA01000013.1	135	10973	11284	0	WP_084162360.1	BBA01S_RS45970	GCF_000685015.1	PAAR domain-containing protein	PAAR_motif	Paraburkholderia bannensis NBRC 103871	Bacteria; Proteobacteria; Betaproteobacteria; Burkholderiales; Burkholderiaceae; Paraburkholderia
NZ_BAYA01000013.1	135	11383	12267	0	WP_027818019.1	BBA01S_RS20035	GCF_000685015.1	hypothetical protein		Paraburkholderia bannensis NBRC 103871	Bacteria; Proteobacteria; Betaproteobacteria; Burkholderiales; Burkholderiaceae; Paraburkholderia
NZ_MASQ01000087.1	136	2734	2973	0	WP_065413333.1	BBC27_RS06820	GCF_001685225.1	hypothetical protein		Acidithiobacillus ferrivorans	Bacteria; Proteobacteria; Acidithiobacillia; Acidithiobacillales; Acidithiobacillaceae; Acidithiobacillus
NZ_MASQ01000087.1	136	3014	4015	0	WP_083091489.1	BBC27_RS06825	GCF_001685225.1	DUF3396 domain-containing protein	DUF3396	Acidithiobacillus ferrivorans	Bacteria; Proteobacteria; Acidithiobacillia; Acidithiobacillales; Acidithiobacillaceae; Acidithiobacillus
NZ_MASQ01000087.1	136	4081	4275	0	WP_065413335.1	BBC27_RS06830	GCF_001685225.1	hypothetical protein		Acidithiobacillus ferrivorans	Bacteria; Proteobacteria; Acidithiobacillia; Acidithiobacillales; Acidithiobacillaceae; Acidithiobacillus
NZ_MASQ01000087.1	136	4305	4544	1	WP_083091491.1	BBC27_RS15590	GCF_001685225.1	VRR-NUC domain-containing protein	VRR_NUC	Acidithiobacillus ferrivorans	Bacteria; Proteobacteria; Acidithiobacillia; Acidithiobacillales; Acidithiobacillaceae; Acidithiobacillus
NZ_MASQ01000087.1	136	4951	5826	0	WP_065413336.1	BBC27_RS06835	GCF_001685225.1	DUF4123 domain-containing protein	DUF4123	Acidithiobacillus ferrivorans	Bacteria; Proteobacteria; Acidithiobacillia; Acidithiobacillales; Acidithiobacillaceae; Acidithiobacillus
NZ_MASQ01000087.1	136	6189	6404	0	WP_014028860.1	BBC27_RS06840	GCF_001685225.1	type II toxin-antitoxin system HicA family toxin	HicA_toxin	Acidithiobacillus ferrivorans	Bacteria; Proteobacteria; Acidithiobacillia; Acidithiobacillales; Acidithiobacillaceae; Acidithiobacillus
NZ_MASQ01000087.1	136	6401	6616	0	WP_014028859.1	BBC27_RS06845	GCF_001685225.1	hypothetical protein	HicB_lk_antitox	Acidithiobacillus ferrivorans	Bacteria; Proteobacteria; Acidithiobacillia; Acidithiobacillales; Acidithiobacillaceae; Acidithiobacillus
NZ_NAHR01000031.1	137	25553	26806	0	WP_084390372.1	B5800_RS09870	GCF_002088795.1	DUF3396 domain-containing protein	DUF3396	Gilliamella apicola	Bacteria; Proteobacteria; Gammaproteobacteria; Orbales; Orbaceae; Gilliamella
NZ_NAHR01000031.1	137	26825	28078	0	WP_084390373.1	B5800_RS09875	GCF_002088795.1	DUF3396 domain-containing protein	DUF3396	Gilliamella apicola	Bacteria; Proteobacteria; Gammaproteobacteria; Orbales; Orbaceae; Gilliamella
NZ_NAHR01000031.1	137	28097	29350	0	WP_084390374.1	B5800_RS09880	GCF_002088795.1	DUF3396 domain-containing protein	DUF3396	Gilliamella apicola	Bacteria; Proteobacteria; Gammaproteobacteria; Orbales; Orbaceae; Gilliamella
NZ_NAHR01000031.1	137	29387	30964	1	WP_084390375.1	B5800_RS09885	GCF_002088795.1	hypothetical protein	VRR_NUC	Gilliamella apicola	Bacteria; Proteobacteria; Gammaproteobacteria; Orbales; Orbaceae; Gilliamella
NZ_NAHR01000031.1	137	30976	32067	0	WP_143421259.1	B5800_RS09890	GCF_002088795.1	type VI secretion system tip protein VgrG	T6SS_Vgr+DUF2345	Gilliamella apicola	Bacteria; Proteobacteria; Gammaproteobacteria; Orbales; Orbaceae; Gilliamella
NZ_BDAG01000025.1	138	83094	83645	0	WP_084321625.1	PMI01S_RS18980	GCF_002091715.1	hypothetical protein	SP	Pseudomonas migulae NBRC 103157	Bacteria; Proteobacteria; Gammaproteobacteria; Pseudomonadales; Pseudomonadaceae; Pseudomonas
NZ_BDAG01000025.1	138	84585	85238	0	WP_084321626.1	PMI01S_RS18995	GCF_002091715.1	DUF2931 family protein	SP+DUF2931	Pseudomonas migulae NBRC 103157	Bacteria; Proteobacteria; Gammaproteobacteria; Pseudomonadales; Pseudomonadaceae; Pseudomonas
NZ_BDAG01000025.1	138	87859	88983	0	WP_084321628.1	PMI01S_RS19005	GCF_002091715.1	DUF3396 domain-containing protein	DUF3396	Pseudomonas migulae NBRC 103157	Bacteria; Proteobacteria; Gammaproteobacteria; Pseudomonadales; Pseudomonadaceae; Pseudomonas
NZ_BDAG01000025.1	138	88994	90385	1	WP_084321629.1	PMI01S_RS19010	GCF_002091715.1	VRR-NUC domain-containing protein	VRR_NUC+DUF3168+TM+TM+TM	Pseudomonas migulae NBRC 103157	Bacteria; Proteobacteria; Gammaproteobacteria; Pseudomonadales; Pseudomonadaceae; Pseudomonas
NZ_BDAG01000025.1	138	92893	93837	0	WP_084321630.1	PMI01S_RS19020	GCF_002091715.1	carbohydrate kinase	PfkB	Pseudomonas migulae NBRC 103157	Bacteria; Proteobacteria; Gammaproteobacteria; Pseudomonadales; Pseudomonadaceae; Pseudomonas
NZ_BDAG01000025.1	138	93851	95347	0	WP_084321631.1	PMI01S_RS19025	GCF_002091715.1	xylulokinase	FGGY_N+FGGY_C	Pseudomonas migulae NBRC 103157	Bacteria; Proteobacteria; Gammaproteobacteria; Pseudomonadales; Pseudomonadaceae; Pseudomonas
NZ_BDAG01000025.1	138	95483	96955	0	WP_084321632.1	PMI01S_RS19030	GCF_002091715.1	mannitol dehydrogenase family protein	Mannitol_dh+Mannitol_dh_C	Pseudomonas migulae NBRC 103157	Bacteria; Proteobacteria; Gammaproteobacteria; Pseudomonadales; Pseudomonadaceae; Pseudomonas
NZ_FLUY01001655.1	139	1	726	0	WP_141699346.1	BQ17_RS17375	GCF_900092655.1	DUF3396 domain-containing protein	DUF3396	Candidatus Thiosymbion oneisti	Bacteria; Proteobacteria; Gammaproteobacteria; Chromatiales; Chromatiaceae; Candidatus Thiosymbion
NZ_FLUY01001655.1	139	739	1908	1	WP_089729247.1	BQ17_RS17380	GCF_900092655.1	DUF4150 domain-containing protein	DUF4150	Candidatus Thiosymbion oneisti	Bacteria; Proteobacteria; Gammaproteobacteria; Chromatiales; Chromatiaceae; Candidatus Thiosymbion
NZ_FLUY01001655.1	139	1899	2750	0	WP_089729249.1	BQ17_RS17385	GCF_900092655.1	hypothetical protein	ketoacyl-synt+TM	Candidatus Thiosymbion oneisti	Bacteria; Proteobacteria; Gammaproteobacteria; Chromatiales; Chromatiaceae; Candidatus Thiosymbion
NZ_FLUY01001655.1	139	2943	3956	0	WP_089729251.1	BQ17_RS17390	GCF_900092655.1	DUF2169 domain-containing protein	DUF2169	Candidatus Thiosymbion oneisti	Bacteria; Proteobacteria; Gammaproteobacteria; Chromatiales; Chromatiaceae; Candidatus Thiosymbion
NZ_FLUY01001655.1	139	4027	4431	0	WP_089729253.1	BQ17_RS17395	GCF_900092655.1	Holliday junction resolvase RuvX	RuvX	Candidatus Thiosymbion oneisti	Bacteria; Proteobacteria; Gammaproteobacteria; Chromatiales; Chromatiaceae; Candidatus Thiosymbion
NZ_NITY01000012.1	140	101474	101788	0	WP_092511329.1	Xmau_RS15115	GCF_002632685.1	hypothetical protein	SP+TM	Xenorhabdus mauleonii	Bacteria; Proteobacteria; Gammaproteobacteria; Enterobacterales; Morganellaceae; Xenorhabdus
NZ_NITY01000012.1	140	101919	102188	0	WP_092511331.1	Xmau_RS15120	GCF_002632685.1	PAAR domain-containing protein	PAAR_motif	Xenorhabdus mauleonii	Bacteria; Proteobacteria; Gammaproteobacteria; Enterobacterales; Morganellaceae; Xenorhabdus
NZ_NITY01000012.1	140	102172	103362	0	WP_092511333.1	Xmau_RS15125	GCF_002632685.1	DUF3396 domain-containing protein	DUF3396	Xenorhabdus mauleonii	Bacteria; Proteobacteria; Gammaproteobacteria; Enterobacterales; Morganellaceae; Xenorhabdus
NZ_NITY01000012.1	140	103376	104923	1	WP_092511335.1	Xmau_RS15130	GCF_002632685.1	VRR-NUC domain-containing protein	VRR_NUC+TM+TM	Xenorhabdus mauleonii	Bacteria; Proteobacteria; Gammaproteobacteria; Enterobacterales; Morganellaceae; Xenorhabdus
NZ_NITY01000012.1	140	103376	104923	1	WP_092511335.1	Xmau_RS15130	GCF_002632685.1	VRR-NUC domain-containing protein	VRR_NUC+TM+TM	Xenorhabdus mauleonii	Bacteria; Proteobacteria; Gammaproteobacteria; Enterobacterales; Morganellaceae; Xenorhabdus
NZ_NITY01000012.1	140	104926	106755	0	WP_092511337.1	Xmau_RS15135	GCF_002632685.1	type VI secretion system tip protein VgrG	Phage_GPD+Phage_base_V+Gp5_C	Xenorhabdus mauleonii	Bacteria; Proteobacteria; Gammaproteobacteria; Enterobacterales; Morganellaceae; Xenorhabdus
NZ_NITY01000012.1	140	107033	107749	0	WP_092511441.1	Xmau_RS15140	GCF_002632685.1	hypothetical protein		Xenorhabdus mauleonii	Bacteria; Proteobacteria; Gammaproteobacteria; Enterobacterales; Morganellaceae; Xenorhabdus
NZ_NITY01000012.1	140	107742	108044	0	WP_092511339.1	Xmau_RS15145	GCF_002632685.1	YjeO family protein	DUF2645	Xenorhabdus mauleonii	Bacteria; Proteobacteria; Gammaproteobacteria; Enterobacterales; Morganellaceae; Xenorhabdus
NZ_FORX01000023.1	141	67893	69974	0	WP_092378874.1	BMZ40_RS17320	GCF_900114115.1	type VI secretion system tip protein VgrG	Phage_GPD+Phage_base_V	Desulfomicrobium apsheronum	Bacteria; Proteobacteria; Deltaproteobacteria; Desulfovibrionales; Desulfomicrobiaceae; Desulfomicrobium
NZ_FORX01000023.1	141	69976	70476	0	WP_177193246.1	BMZ40_RS17325	GCF_900114115.1	DUF4123 domain-containing protein	DUF4123	Desulfomicrobium apsheronum	Bacteria; Proteobacteria; Deltaproteobacteria; Desulfovibrionales; Desulfomicrobiaceae; Desulfomicrobium
NZ_FORX01000023.1	141	70570	70986	0	WP_177193247.1	BMZ40_RS17330	GCF_900114115.1	hypothetical protein		Desulfomicrobium apsheronum	Bacteria; Proteobacteria; Deltaproteobacteria; Desulfovibrionales; Desulfomicrobiaceae; Desulfomicrobium
NZ_FORX01000023.1	141	70983	71894	1	WP_092378883.1	BMZ40_RS17335	GCF_900114115.1	VRR-NUC domain-containing protein	SP+VRR_NUC	Desulfomicrobium apsheronum	Bacteria; Proteobacteria; Deltaproteobacteria; Desulfovibrionales; Desulfomicrobiaceae; Desulfomicrobium
NZ_FORX01000023.1	141	70983	71894	1	WP_092378883.1	BMZ40_RS17335	GCF_900114115.1	VRR-NUC domain-containing protein	SP+VRR_NUC	Desulfomicrobium apsheronum	Bacteria; Proteobacteria; Deltaproteobacteria; Desulfovibrionales; Desulfomicrobiaceae; Desulfomicrobium
NZ_FORX01000023.1	141	71909	72284	0	WP_143075689.1	BMZ40_RS17340	GCF_900114115.1	hypothetical protein		Desulfomicrobium apsheronum	Bacteria; Proteobacteria; Deltaproteobacteria; Desulfovibrionales; Desulfomicrobiaceae; Desulfomicrobium
NZ_CP014137.1	142	5245963	5246538	0	WP_095835610.1	AWC36_RS23385	GCF_002291445.1	1,6-anhydro-N-acetylmuramyl-L-alanine amidase AmpD	Amidase_2	Brenneria goodwinii	Bacteria; Proteobacteria; Gammaproteobacteria; Enterobacterales; Pectobacteriaceae; Brenneria
NZ_CP014137.1	142	5246535	5247389	0	WP_048637512.1	AWC36_RS23390	GCF_002291445.1	beta-lactamase regulator AmpE	AmpE	Brenneria goodwinii	Bacteria; Proteobacteria; Gammaproteobacteria; Enterobacterales; Pectobacteriaceae; Brenneria
NZ_CP014137.1	142	5247804	5250416	0	WP_095835611.1	AWC36_RS23395	GCF_002291445.1	type VI secretion system tip protein VgrG	Phage_GPD+Phage_base_V+T6SS_Vgr+DUF2345	Brenneria goodwinii	Bacteria; Proteobacteria; Gammaproteobacteria; Enterobacterales; Pectobacteriaceae; Brenneria
NZ_CP014137.1	142	5250413	5251741	1	WP_095835612.1	AWC36_RS23400	GCF_002291445.1	VRR-NUC domain-containing protein	VRR_NUC	Brenneria goodwinii	Bacteria; Proteobacteria; Gammaproteobacteria; Enterobacterales; Pectobacteriaceae; Brenneria
NZ_CP014137.1	142	5250413	5251741	1	WP_095835612.1	AWC36_RS23400	GCF_002291445.1	VRR-NUC domain-containing protein	VRR_NUC	Brenneria goodwinii	Bacteria; Proteobacteria; Gammaproteobacteria; Enterobacterales; Pectobacteriaceae; Brenneria
NZ_CP014137.1	142	5251758	5252993	0	WP_095835613.1	AWC36_RS23405	GCF_002291445.1	DUF3396 domain-containing protein	DUF3396	Brenneria goodwinii	Bacteria; Proteobacteria; Gammaproteobacteria; Enterobacterales; Pectobacteriaceae; Brenneria
NZ_CP014137.1	142	5253006	5254244	0	WP_095835614.1	AWC36_RS23410	GCF_002291445.1	DUF3396 domain-containing protein	DUF3396	Brenneria goodwinii	Bacteria; Proteobacteria; Gammaproteobacteria; Enterobacterales; Pectobacteriaceae; Brenneria
NZ_CP014137.1	142	5254257	5254481	0	WP_095835615.1	AWC36_RS23415	GCF_002291445.1	hypothetical protein		Brenneria goodwinii	Bacteria; Proteobacteria; Gammaproteobacteria; Enterobacterales; Pectobacteriaceae; Brenneria
NZ_PITQ01000010.1	143	82384	83499	0	WP_101079074.1	CWS43_RS21070	GCF_002834385.1	hypothetical protein	Imm71+Imm72	Rahnella sp. AA	Bacteria; Proteobacteria; Gammaproteobacteria; Enterobacterales; Yersiniaceae; Rahnella; unclassified Rahnella
NZ_PITQ01000010.1	143	83496	85046	0	WP_101079075.1	CWS43_RS21075	GCF_002834385.1	hypothetical protein	TM	Rahnella sp. AA	Bacteria; Proteobacteria; Gammaproteobacteria; Enterobacterales; Yersiniaceae; Rahnella; unclassified Rahnella
NZ_PITQ01000010.1	143	86430	87632	0	WP_101079077.1	CWS43_RS21085	GCF_002834385.1	DUF3396 domain-containing protein	DUF3396	Rahnella sp. AA	Bacteria; Proteobacteria; Gammaproteobacteria; Enterobacterales; Yersiniaceae; Rahnella; unclassified Rahnella
NZ_PITQ01000010.1	143	87651	88967	1	WP_101079079.1	CWS43_RS21090	GCF_002834385.1	hypothetical protein		Rahnella sp. AA	Bacteria; Proteobacteria; Gammaproteobacteria; Enterobacterales; Yersiniaceae; Rahnella; unclassified Rahnella
NZ_PITQ01000010.1	143	88980	91523	0	WP_101079081.1	CWS43_RS21095	GCF_002834385.1	type VI secretion system tip protein VgrG	Phage_GPD+Phage_base_V+T6SS_Vgr+DUF2345	Rahnella sp. AA	Bacteria; Proteobacteria; Gammaproteobacteria; Enterobacterales; Yersiniaceae; Rahnella; unclassified Rahnella
NZ_PITQ01000010.1	143	91536	92078	0	WP_101079083.1	CWS43_RS21100	GCF_002834385.1	type VI secretion system lipoprotein TssJ	SP+T6SS-SciN	Rahnella sp. AA	Bacteria; Proteobacteria; Gammaproteobacteria; Enterobacterales; Yersiniaceae; Rahnella; unclassified Rahnella
NZ_PITQ01000010.1	143	92142	93224	0	WP_101079085.1	CWS43_RS21105	GCF_002834385.1	type VI secretion system baseplate subunit TssG	T6SS_TssG	Rahnella sp. AA	Bacteria; Proteobacteria; Gammaproteobacteria; Enterobacterales; Yersiniaceae; Rahnella; unclassified Rahnella
NZ_CP023270.1	144	5569469	5570647	0	WP_158685930.1	CLM73_RS25200	GCF_002966795.1	DUF3396 domain-containing protein	DUF3396	Achromobacter spanius	Bacteria; Proteobacteria; Betaproteobacteria; Burkholderiales; Alcaligenaceae; Achromobacter
NZ_CP023270.1	144	5570830	5572053	0	WP_158685931.1	CLM73_RS25205	GCF_002966795.1	hypothetical protein	VRR_NUC	Achromobacter spanius	Bacteria; Proteobacteria; Betaproteobacteria; Burkholderiales; Alcaligenaceae; Achromobacter
NZ_CP023270.1	144	5572050	5573228	0	WP_105240750.1	CLM73_RS25210	GCF_002966795.1	DUF3396 domain-containing protein	DUF3396	Achromobacter spanius	Bacteria; Proteobacteria; Betaproteobacteria; Burkholderiales; Alcaligenaceae; Achromobacter
NZ_CP023270.1	144	5573318	5574646	1	WP_105240751.1	CLM73_RS25215	GCF_002966795.1	VRR-NUC domain-containing protein	VRR_NUC	Achromobacter spanius	Bacteria; Proteobacteria; Betaproteobacteria; Burkholderiales; Alcaligenaceae; Achromobacter
NZ_CP023270.1	144	5574643	5575821	0	WP_158685932.1	CLM73_RS25220	GCF_002966795.1	DUF3396 domain-containing protein	DUF3396	Achromobacter spanius	Bacteria; Proteobacteria; Betaproteobacteria; Burkholderiales; Alcaligenaceae; Achromobacter
NZ_CP023270.1	144	5576004	5577239	0	WP_158685933.1	CLM73_RS25225	GCF_002966795.1	VRR-NUC domain-containing protein	VRR_NUC	Achromobacter spanius	Bacteria; Proteobacteria; Betaproteobacteria; Burkholderiales; Alcaligenaceae; Achromobacter
NZ_CP023270.1	144	5577236	5578414	0	WP_158685934.1	CLM73_RS25230	GCF_002966795.1	DUF3396 domain-containing protein	DUF3396	Achromobacter spanius	Bacteria; Proteobacteria; Betaproteobacteria; Burkholderiales; Alcaligenaceae; Achromobacter
NZ_PUWV01000104.1	145	1579	2724	0	WP_105399818.1	C6H64_RS23375	GCF_002969005.1	DUF3396 domain-containing protein	DUF3396	Photorhabdus luminescens	Bacteria; Proteobacteria; Gammaproteobacteria; Enterobacterales; Morganellaceae; Photorhabdus
NZ_PUWV01000104.1	145	2739	4100	1	WP_105399819.1	C6H64_RS23380	GCF_002969005.1	VRR-NUC domain-containing protein	VRR_NUC+TM+TM	Photorhabdus luminescens	Bacteria; Proteobacteria; Gammaproteobacteria; Enterobacterales; Morganellaceae; Photorhabdus
NZ_PVEN01000008.1	146	106268	107908	0	WP_181156994.1	B0G83_RS21080	GCF_002973525.1	AAA family ATPase	AAA_21+AAA_21+DUF4435	Paraburkholderia sp. BL21I4N1	Bacteria; Proteobacteria; Betaproteobacteria; Burkholderiales; Burkholderiaceae; Paraburkholderia
NZ_PVEN01000008.1	146	108425	109225	0	WP_181156996.1	B0G83_RS21090	GCF_002973525.1	hypothetical protein	SP+3D	Paraburkholderia sp. BL21I4N1	Bacteria; Proteobacteria; Betaproteobacteria; Burkholderiales; Burkholderiaceae; Paraburkholderia
NZ_PVEN01000008.1	146	109757	110296	0	WP_105509352.1	B0G83_RS21095	GCF_002973525.1	PAAR domain-containing protein	PAAR_motif	Paraburkholderia sp. BL21I4N1	Bacteria; Proteobacteria; Betaproteobacteria; Burkholderiales; Burkholderiaceae; Paraburkholderia
NZ_PVEN01000008.1	146	110293	111033	1	WP_105509353.1	B0G83_RS21100	GCF_002973525.1	VRR-NUC domain-containing protein	VRR_NUC	Paraburkholderia sp. BL21I4N1	Bacteria; Proteobacteria; Betaproteobacteria; Burkholderiales; Burkholderiaceae; Paraburkholderia
NZ_PVEN01000008.1	146	111068	112150	0	WP_105509549.1	B0G83_RS21105	GCF_002973525.1	DUF3396 domain-containing protein	DUF3396	Paraburkholderia sp. BL21I4N1	Bacteria; Proteobacteria; Betaproteobacteria; Burkholderiales; Burkholderiaceae; Paraburkholderia
NZ_PVEN01000008.1	146	112341	113384	0	WP_105509354.1	B0G83_RS21110	GCF_002973525.1	helix-turn-helix domain-containing protein	AraC_binding_2+HTH_18	Paraburkholderia sp. BL21I4N1	Bacteria; Proteobacteria; Betaproteobacteria; Burkholderiales; Burkholderiaceae; Paraburkholderia
NZ_PVEN01000008.1	146	113717	114172	0	WP_105509355.1	B0G83_RS21115	GCF_002973525.1	helix-turn-helix domain-containing protein	HTH_3	Paraburkholderia sp. BL21I4N1	Bacteria; Proteobacteria; Betaproteobacteria; Burkholderiales; Burkholderiaceae; Paraburkholderia
NZ_NRNO01000006.1	147	121776	122090	0	WP_007722851.1	CI867_RS04295	GCF_002978625.1	PTS sugar transporter subunit IIB	PTS_IIB	Cronobacter dublinensis	Bacteria; Proteobacteria; Gammaproteobacteria; Enterobacterales; Enterobacteriaceae; Cronobacter
NZ_NRNO01000006.1	147	122381	123334	0	WP_105637556.1	CI867_RS04300	GCF_002978625.1	LacI family transcriptional regulator	LacI+Peripla_BP_3	Cronobacter dublinensis	Bacteria; Proteobacteria; Gammaproteobacteria; Enterobacterales; Enterobacteriaceae; Cronobacter
NZ_NRNO01000006.1	147	123674	126196	0	WP_105637557.1	CI867_RS04305	GCF_002978625.1	type VI secretion system tip protein VgrG	Phage_GPD+Phage_base_V+T6SS_Vgr+DUF2345	Cronobacter dublinensis	Bacteria; Proteobacteria; Gammaproteobacteria; Enterobacterales; Enterobacteriaceae; Cronobacter
NZ_NRNO01000006.1	147	126196	127458	1	WP_105637558.1	CI867_RS04310	GCF_002978625.1	VRR-NUC domain-containing protein	VRR_NUC	Cronobacter dublinensis	Bacteria; Proteobacteria; Gammaproteobacteria; Enterobacterales; Enterobacteriaceae; Cronobacter
NZ_PVHH01000020.1	148	14311	15363	0	WP_105752286.1	C6T53_RS03665	GCF_002981535.1	phage portal protein	Phage_portal	Burkholderia multivorans	Bacteria; Proteobacteria; Betaproteobacteria; Burkholderiales; Burkholderiaceae; Burkholderia; Burkholderia cepacia complex
NZ_PVHH01000020.1	148	15742	16041	0	WP_105810941.1	C6T53_RS03675	GCF_002981535.1	hypothetical protein		Burkholderia multivorans	Bacteria; Proteobacteria; Betaproteobacteria; Burkholderiales; Burkholderiaceae; Burkholderia; Burkholderia cepacia complex
NZ_PVHH01000020.1	148	16223	17548	0	WP_105810942.1	C6T53_RS03680	GCF_002981535.1	DUF3396 domain-containing protein	DUF3396+DUF3396	Burkholderia multivorans	Bacteria; Proteobacteria; Betaproteobacteria; Burkholderiales; Burkholderiaceae; Burkholderia; Burkholderia cepacia complex
NZ_PVHH01000020.1	148	17593	18852	1	WP_105810943.1	C6T53_RS03685	GCF_002981535.1	VRR-NUC domain-containing protein	VRR_NUC+TM+TM	Burkholderia multivorans	Bacteria; Proteobacteria; Betaproteobacteria; Burkholderiales; Burkholderiaceae; Burkholderia; Burkholderia cepacia complex
NZ_PVHH01000020.1	148	18856	21519	0	WP_105810958.1	C6T53_RS03690	GCF_002981535.1	type VI secretion system tip protein VgrG	Phage_GPD+T6SS_Vgr+DUF2345	Burkholderia multivorans	Bacteria; Proteobacteria; Betaproteobacteria; Burkholderiales; Burkholderiaceae; Burkholderia; Burkholderia cepacia complex
NZ_PVHH01000020.1	148	22151	23809	0	WP_035488914.1	C6T53_RS03700	GCF_002981535.1	MHS family MFS transporter	Sugar_tr+Sugar_tr+Sugar_tr	Burkholderia multivorans	Bacteria; Proteobacteria; Betaproteobacteria; Burkholderiales; Burkholderiaceae; Burkholderia; Burkholderia cepacia complex
NZ_PVHH01000020.1	148	24036	25580	0	WP_006406511.1	C6T53_RS03705	GCF_002981535.1	sensor histidine kinase	2CSK_N+TM+HAMP+HisKA+HATPase_c	Burkholderia multivorans	Bacteria; Proteobacteria; Betaproteobacteria; Burkholderiales; Burkholderiaceae; Burkholderia; Burkholderia cepacia complex
NZ_POXL01000006.1	149	174274	175134	0	WP_107858038.1	DBY97_RS08260	GCF_003044645.1	SDR family oxidoreductase	NAD_binding_10	Neisseria subflava	Bacteria; Proteobacteria; Betaproteobacteria; Neisseriales; Neisseriaceae; Neisseria
NZ_POXL01000006.1	149	175858	176088	0	WP_107858039.1	DBY97_RS08265	GCF_003044645.1	RHS domain-containing protein	RHS	Neisseria subflava	Bacteria; Proteobacteria; Betaproteobacteria; Neisseriales; Neisseriaceae; Neisseria
NZ_POXL01000006.1	149	176132	176554	0	WP_159069483.1	DBY97_RS08270	GCF_003044645.1	hypothetical protein		Neisseria subflava	Bacteria; Proteobacteria; Betaproteobacteria; Neisseriales; Neisseriaceae; Neisseria
NZ_POXL01000006.1	149	176720	177691	1	WP_107858041.1	DBY97_RS08275	GCF_003044645.1	VRR-NUC domain-containing protein	VRR_NUC+TM+TM	Neisseria subflava	Bacteria; Proteobacteria; Betaproteobacteria; Neisseriales; Neisseriaceae; Neisseria
NZ_POXL01000006.1	149	177761	178999	0	WP_107858042.1	DBY97_RS08280	GCF_003044645.1	DUF3396 domain-containing protein	DUF3396	Neisseria subflava	Bacteria; Proteobacteria; Betaproteobacteria; Neisseriales; Neisseriaceae; Neisseria
NZ_POXL01000006.1	149	179175	179885	0	WP_159069484.1	DBY97_RS08285	GCF_003044645.1	hypothetical protein	RHS_repeat+RHS_repeat	Neisseria subflava	Bacteria; Proteobacteria; Betaproteobacteria; Neisseriales; Neisseriaceae; Neisseria
NZ_POXL01000006.1	149	180695	181213	0	WP_107858045.1	DBY97_RS08295	GCF_003044645.1	hypothetical protein		Neisseria subflava	Bacteria; Proteobacteria; Betaproteobacteria; Neisseriales; Neisseriaceae; Neisseria
NZ_LXPW01000050.1	150	13026	14501	0	WP_063954642.1	A7J67_RS17350	GCF_001641525.1	aldehyde dehydrogenase	Aldedh	Achromobacter xylosoxidans	Bacteria; Proteobacteria; Betaproteobacteria; Burkholderiales; Alcaligenaceae; Achromobacter
NZ_LXPW01000050.1	150	15735	17915	0	WP_081259873.1	A7J67_RS17360	GCF_001641525.1	response regulator	GAF_2+HisKA+HATPase_c+Response_reg	Achromobacter xylosoxidans	Bacteria; Proteobacteria; Betaproteobacteria; Burkholderiales; Alcaligenaceae; Achromobacter
NZ_LXPW01000050.1	150	18235	20832	0	WP_063954643.1	A7J67_RS17365	GCF_001641525.1	type VI secretion system tip protein VgrG	Phage_GPD+Phage_base_V+T6SS_Vgr+DUF2345	Achromobacter xylosoxidans	Bacteria; Proteobacteria; Betaproteobacteria; Burkholderiales; Alcaligenaceae; Achromobacter
NZ_LXPW01000050.1	150	20836	22164	1	WP_108696212.1	A7J67_RS27860	GCF_001641525.1	hypothetical protein	VRR_NUC	Achromobacter xylosoxidans	Bacteria; Proteobacteria; Betaproteobacteria; Burkholderiales; Alcaligenaceae; Achromobacter
NZ_LXPW01000050.1	150	22161	23339	0	WP_063954645.1	A7J67_RS17375	GCF_001641525.1	DUF3396 domain-containing protein	DUF3396	Achromobacter xylosoxidans	Bacteria; Proteobacteria; Betaproteobacteria; Burkholderiales; Alcaligenaceae; Achromobacter
NZ_LXPW01000050.1	150	23447	24679	0	WP_167428001.1	A7J67_RS17380	GCF_001641525.1	VRR-NUC domain-containing protein	VRR_NUC	Achromobacter xylosoxidans	Bacteria; Proteobacteria; Betaproteobacteria; Burkholderiales; Alcaligenaceae; Achromobacter
NZ_LXPW01000050.1	150	24679	25857	0	WP_063954647.1	A7J67_RS17385	GCF_001641525.1	DUF3396 domain-containing protein	DUF3396	Achromobacter xylosoxidans	Bacteria; Proteobacteria; Betaproteobacteria; Burkholderiales; Alcaligenaceae; Achromobacter
NZ_CM009834.1	151	1	766	1	WP_109728028.1	DCF83_RS00005	GCF_003113475.1	VRR-NUC domain-containing protein	VRR_NUC+TM+TM	Edwardsiella tarda	Bacteria; Proteobacteria; Gammaproteobacteria; Enterobacterales; Hafniaceae; Edwardsiella
NZ_CM009834.1	151	1	766	1	WP_109728028.1	DCF83_RS00005	GCF_003113475.1	VRR-NUC domain-containing protein	VRR_NUC+TM+TM	Edwardsiella tarda	Bacteria; Proteobacteria; Gammaproteobacteria; Enterobacterales; Hafniaceae; Edwardsiella
NZ_CM009834.1	151	1	766	1	WP_109728028.1	DCF83_RS00005	GCF_003113475.1	VRR-NUC domain-containing protein	VRR_NUC+TM+TM	Edwardsiella tarda	Bacteria; Proteobacteria; Gammaproteobacteria; Enterobacterales; Hafniaceae; Edwardsiella
NZ_CM009834.1	151	1	766	1	WP_109728028.1	DCF83_RS00005	GCF_003113475.1	VRR-NUC domain-containing protein	VRR_NUC+TM+TM	Edwardsiella tarda	Bacteria; Proteobacteria; Gammaproteobacteria; Enterobacterales; Hafniaceae; Edwardsiella
NZ_CM009834.1	151	1	766	1	WP_109728028.1	DCF83_RS00005	GCF_003113475.1	VRR-NUC domain-containing protein	VRR_NUC+TM+TM	Edwardsiella tarda	Bacteria; Proteobacteria; Gammaproteobacteria; Enterobacterales; Hafniaceae; Edwardsiella
NZ_CM009834.1	151	1	766	1	WP_109728028.1	DCF83_RS00005	GCF_003113475.1	VRR-NUC domain-containing protein	VRR_NUC+TM+TM	Edwardsiella tarda	Bacteria; Proteobacteria; Gammaproteobacteria; Enterobacterales; Hafniaceae; Edwardsiella
NZ_CM009834.1	151	1	766	1	WP_109728028.1	DCF83_RS00005	GCF_003113475.1	VRR-NUC domain-containing protein	VRR_NUC+TM+TM	Edwardsiella tarda	Bacteria; Proteobacteria; Gammaproteobacteria; Enterobacterales; Hafniaceae; Edwardsiella
NZ_CM009834.1	151	1	766	1	WP_109728028.1	DCF83_RS00005	GCF_003113475.1	VRR-NUC domain-containing protein	VRR_NUC+TM+TM	Edwardsiella tarda	Bacteria; Proteobacteria; Gammaproteobacteria; Enterobacterales; Hafniaceae; Edwardsiella
NZ_CM009834.1	151	5092	5624	1	WP_109728028.1	DCF83_RS00005	GCF_003113475.1	VRR-NUC domain-containing protein	VRR_NUC+TM+TM	Edwardsiella tarda	Bacteria; Proteobacteria; Gammaproteobacteria; Enterobacterales; Hafniaceae; Edwardsiella
NZ_CM009834.1	151	5092	5624	1	WP_109728028.1	DCF83_RS00005	GCF_003113475.1	VRR-NUC domain-containing protein	VRR_NUC+TM+TM	Edwardsiella tarda	Bacteria; Proteobacteria; Gammaproteobacteria; Enterobacterales; Hafniaceae; Edwardsiella
NZ_CM009834.1	151	5092	5624	1	WP_109728028.1	DCF83_RS00005	GCF_003113475.1	VRR-NUC domain-containing protein	VRR_NUC+TM+TM	Edwardsiella tarda	Bacteria; Proteobacteria; Gammaproteobacteria; Enterobacterales; Hafniaceae; Edwardsiella
NZ_CM009834.1	151	5092	5624	1	WP_109728028.1	DCF83_RS00005	GCF_003113475.1	VRR-NUC domain-containing protein	VRR_NUC+TM+TM	Edwardsiella tarda	Bacteria; Proteobacteria; Gammaproteobacteria; Enterobacterales; Hafniaceae; Edwardsiella
NZ_CM009834.1	151	5092	5624	1	WP_109728028.1	DCF83_RS00005	GCF_003113475.1	VRR-NUC domain-containing protein	VRR_NUC+TM+TM	Edwardsiella tarda	Bacteria; Proteobacteria; Gammaproteobacteria; Enterobacterales; Hafniaceae; Edwardsiella
NZ_CM009834.1	151	5092	5624	1	WP_109728028.1	DCF83_RS00005	GCF_003113475.1	VRR-NUC domain-containing protein	VRR_NUC+TM+TM	Edwardsiella tarda	Bacteria; Proteobacteria; Gammaproteobacteria; Enterobacterales; Hafniaceae; Edwardsiella
NZ_CM009834.1	151	5092	5624	1	WP_109728028.1	DCF83_RS00005	GCF_003113475.1	VRR-NUC domain-containing protein	VRR_NUC+TM+TM	Edwardsiella tarda	Bacteria; Proteobacteria; Gammaproteobacteria; Enterobacterales; Hafniaceae; Edwardsiella
NZ_CM009834.1	151	5092	5624	1	WP_109728028.1	DCF83_RS00005	GCF_003113475.1	VRR-NUC domain-containing protein	VRR_NUC+TM+TM	Edwardsiella tarda	Bacteria; Proteobacteria; Gammaproteobacteria; Enterobacterales; Hafniaceae; Edwardsiella
NZ_CM009834.1	151	776	1996	0	WP_109728030.1	DCF83_RS00010	GCF_003113475.1	DUF3396 domain-containing protein	DUF3396	Edwardsiella tarda	Bacteria; Proteobacteria; Gammaproteobacteria; Enterobacterales; Hafniaceae; Edwardsiella
NZ_CM009834.1	151	776	1996	0	WP_109728030.1	DCF83_RS00010	GCF_003113475.1	DUF3396 domain-containing protein	DUF3396	Edwardsiella tarda	Bacteria; Proteobacteria; Gammaproteobacteria; Enterobacterales; Hafniaceae; Edwardsiella
NZ_CM009834.1	151	2305	2520	0	WP_146197241.1	DCF83_RS17990	GCF_003113475.1	MbeD family mobilization/exclusion protein	MbeD_MobD	Edwardsiella tarda	Bacteria; Proteobacteria; Gammaproteobacteria; Enterobacterales; Hafniaceae; Edwardsiella
NZ_CM009834.1	151	2305	2520	0	WP_146197241.1	DCF83_RS17990	GCF_003113475.1	MbeD family mobilization/exclusion protein	MbeD_MobD	Edwardsiella tarda	Bacteria; Proteobacteria; Gammaproteobacteria; Enterobacterales; Hafniaceae; Edwardsiella
NZ_CM009834.1	151	2524	3009	0	WP_146197242.1	DCF83_RS17995	GCF_003113475.1	MbeB family mobilization protein	MbeB_N+TM	Edwardsiella tarda	Bacteria; Proteobacteria; Gammaproteobacteria; Enterobacterales; Hafniaceae; Edwardsiella
NZ_CM009834.1	151	2524	3009	0	WP_146197242.1	DCF83_RS17995	GCF_003113475.1	MbeB family mobilization protein	MbeB_N+TM	Edwardsiella tarda	Bacteria; Proteobacteria; Gammaproteobacteria; Enterobacterales; Hafniaceae; Edwardsiella
NZ_CM009834.1	151	3687	4031	0	WP_109728034.1	DCF83_RS00020	GCF_003113475.1	MobC family plasmid mobilization relaxosome protein	MobC	Edwardsiella tarda	Bacteria; Proteobacteria; Gammaproteobacteria; Enterobacterales; Hafniaceae; Edwardsiella
NZ_CM009834.1	151	3687	4031	0	WP_109728034.1	DCF83_RS00020	GCF_003113475.1	MobC family plasmid mobilization relaxosome protein	MobC	Edwardsiella tarda	Bacteria; Proteobacteria; Gammaproteobacteria; Enterobacterales; Hafniaceae; Edwardsiella
NZ_CM009834.1	151	4021	4197	0	WP_181366818.1	DCF83_RS18165	GCF_003113475.1	hypothetical protein		Edwardsiella tarda	Bacteria; Proteobacteria; Gammaproteobacteria; Enterobacterales; Hafniaceae; Edwardsiella
NZ_CM009834.1	151	4021	4197	0	WP_181366818.1	DCF83_RS18165	GCF_003113475.1	hypothetical protein		Edwardsiella tarda	Bacteria; Proteobacteria; Gammaproteobacteria; Enterobacterales; Hafniaceae; Edwardsiella
NZ_LS483470.1	152	569860	572733	0	WP_111739193.1	DQM29_RS02740	GCF_900478135.1	aminomethyl-transferring glycine dehydrogenase	GDC-P+GDC-P	Leminorella richardii	Bacteria; Proteobacteria; Gammaproteobacteria; Enterobacterales; Budviciaceae; Leminorella
NZ_LS483470.1	152	573217	574635	0	WP_111739194.1	DQM29_RS02745	GCF_900478135.1	sodium:alanine symporter family protein	TM+Na_Ala_symp	Leminorella richardii	Bacteria; Proteobacteria; Gammaproteobacteria; Enterobacterales; Budviciaceae; Leminorella
NZ_LS483470.1	152	574872	577973	0	WP_111739195.1	DQM29_RS02750	GCF_900478135.1	type VI secretion system tip protein VgrG	Phage_GPD+Phage_base_V+T6SS_Vgr+DUF2345	Leminorella richardii	Bacteria; Proteobacteria; Gammaproteobacteria; Enterobacterales; Budviciaceae; Leminorella
NZ_LS483470.1	152	577970	579403	1	WP_111739196.1	DQM29_RS02755	GCF_900478135.1	hypothetical protein	VRR_NUC	Leminorella richardii	Bacteria; Proteobacteria; Gammaproteobacteria; Enterobacterales; Budviciaceae; Leminorella
NZ_LS483470.1	152	577970	579403	1	WP_111739196.1	DQM29_RS02755	GCF_900478135.1	hypothetical protein	VRR_NUC	Leminorella richardii	Bacteria; Proteobacteria; Gammaproteobacteria; Enterobacterales; Budviciaceae; Leminorella
NZ_LS483470.1	152	579423	580625	0	WP_111739197.1	DQM29_RS02760	GCF_900478135.1	DUF3396 domain-containing protein	DUF3396	Leminorella richardii	Bacteria; Proteobacteria; Gammaproteobacteria; Enterobacterales; Budviciaceae; Leminorella
NZ_LS483470.1	152	580629	581816	0	WP_111739198.1	DQM29_RS02765	GCF_900478135.1	DUF3396 domain-containing protein	DUF3396	Leminorella richardii	Bacteria; Proteobacteria; Gammaproteobacteria; Enterobacterales; Budviciaceae; Leminorella
NZ_LS483470.1	152	581819	582079	0	WP_111739199.1	DQM29_RS02770	GCF_900478135.1	PAAR domain-containing protein	PAAR_motif	Leminorella richardii	Bacteria; Proteobacteria; Gammaproteobacteria; Enterobacterales; Budviciaceae; Leminorella
NZ_MUXV01000088.1	153	127	1422	0	WP_078275396.1	B0182_RS13415	GCF_002014975.1	DUF3396 domain-containing protein	DUF3396	Moraxella bovis	Bacteria; Proteobacteria; Gammaproteobacteria; Moraxellales; Moraxellaceae; Moraxella
NZ_MUXV01000088.1	153	1450	2370	1	WP_112742646.1	B0182_RS13420	GCF_002014975.1	VRR-NUC domain-containing protein	VRR_NUC+TM	Moraxella bovis	Bacteria; Proteobacteria; Gammaproteobacteria; Moraxellales; Moraxellaceae; Moraxella
NZ_MUXV01000088.1	153	1450	2370	1	WP_112742646.1	B0182_RS13420	GCF_002014975.1	VRR-NUC domain-containing protein	VRR_NUC+TM	Moraxella bovis	Bacteria; Proteobacteria; Gammaproteobacteria; Moraxellales; Moraxellaceae; Moraxella
NZ_MUXV01000088.1	153	2357	2640	0	WP_211271656.1	B0182_RS13425	GCF_002014975.1	hypothetical protein	Big_1	Moraxella bovis	Bacteria; Proteobacteria; Gammaproteobacteria; Moraxellales; Moraxellaceae; Moraxella
NZ_QNIO01000511.1	154	18771	18953	0	WP_027703308.1	BRL93_RS23525	GCF_003297765.1	RaxX family RiPP		Xanthomonas oryzae pv. oryzae	Bacteria; Proteobacteria; Gammaproteobacteria; Xanthomonadales; Xanthomonadaceae; Xanthomonas
NZ_QNIO01000511.1	154	19412	22375	0	WP_181717776.1	BRL93_RS23530	GCF_003297765.1	aminomethyl-transferring glycine dehydrogenase	GDC-P+GDC-P+TM	Xanthomonas oryzae pv. oryzae	Bacteria; Proteobacteria; Gammaproteobacteria; Xanthomonadales; Xanthomonadaceae; Xanthomonas
NZ_QNIO01000511.1	154	22705	23154	0	WP_011409249.1	BRL93_RS23540	GCF_003297765.1	hypothetical protein		Xanthomonas oryzae pv. oryzae	Bacteria; Proteobacteria; Gammaproteobacteria; Xanthomonadales; Xanthomonadaceae; Xanthomonas
NZ_QNIO01000511.1	154	23151	23846	1	WP_113255848.1	BRL93_RS23545	GCF_003297765.1	VRR-NUC domain-containing protein	VRR_NUC	Xanthomonas oryzae pv. oryzae	Bacteria; Proteobacteria; Gammaproteobacteria; Xanthomonadales; Xanthomonadaceae; Xanthomonas
NZ_QNIO01000511.1	154	23854	24924	0	WP_113255849.1	BRL93_RS23550	GCF_003297765.1	DUF3396 domain-containing protein	DUF3396	Xanthomonas oryzae pv. oryzae	Bacteria; Proteobacteria; Gammaproteobacteria; Xanthomonadales; Xanthomonadaceae; Xanthomonas
NZ_QNIO01000511.1	154	25014	25934	0	WP_181717777.1	BRL93_RS23555	GCF_003297765.1	DUF3396 domain-containing protein	DUF3396	Xanthomonas oryzae pv. oryzae	Bacteria; Proteobacteria; Gammaproteobacteria; Xanthomonadales; Xanthomonadaceae; Xanthomonas
NZ_BGPP01000003.1	155	538335	539252	0	WP_116423473.1	PCLA_RS09210	GCF_003402515.1	ketopantoate reductase family protein	ApbA+ApbA_C	Pseudomonas citronellolis	Bacteria; Proteobacteria; Gammaproteobacteria; Pseudomonadales; Pseudomonadaceae; Pseudomonas
NZ_BGPP01000003.1	155	539340	540398	0	WP_116423537.1	PCLA_RS09215	GCF_003402515.1	DUF3396 domain-containing protein	DUF3396	Pseudomonas citronellolis	Bacteria; Proteobacteria; Gammaproteobacteria; Pseudomonadales; Pseudomonadaceae; Pseudomonas
NZ_BGPP01000003.1	155	540458	541546	0	WP_116423474.1	PCLA_RS09220	GCF_003402515.1	DUF3396 domain-containing protein	DUF3396	Pseudomonas citronellolis	Bacteria; Proteobacteria; Gammaproteobacteria; Pseudomonadales; Pseudomonadaceae; Pseudomonas
NZ_BGPP01000003.1	155	541562	542263	1	WP_116423475.1	PCLA_RS09225	GCF_003402515.1	VRR-NUC domain-containing protein	VRR_NUC+TM	Pseudomonas citronellolis	Bacteria; Proteobacteria; Gammaproteobacteria; Pseudomonadales; Pseudomonadaceae; Pseudomonas
NZ_BGPP01000003.1	155	542260	542778	0	WP_116423476.1	PCLA_RS09230	GCF_003402515.1	PAAR domain-containing protein	PAAR_motif+PAAR_motif	Pseudomonas citronellolis	Bacteria; Proteobacteria; Gammaproteobacteria; Pseudomonadales; Pseudomonadaceae; Pseudomonas
NZ_BGPP01000003.1	155	542826	543233	0	WP_181925975.1	PCLA_RS09235	GCF_003402515.1	PAAR domain-containing protein	PAAR_motif	Pseudomonas citronellolis	Bacteria; Proteobacteria; Gammaproteobacteria; Pseudomonadales; Pseudomonadaceae; Pseudomonas
NZ_BGPP01000003.1	155	543891	544733	0	WP_116423478.1	PCLA_RS09240	GCF_003402515.1	TIM barrel protein	AP_endonuc_2	Pseudomonas citronellolis	Bacteria; Proteobacteria; Gammaproteobacteria; Pseudomonadales; Pseudomonadaceae; Pseudomonas
NZ_QPDT01000010.1	156	64265	65866	0	WP_117182652.1	D2G37_RS14810	GCF_003416215.1	PAS domain-containing protein	PAS_9+HisKA+HATPase_c+Response_reg	Pseudomonas cichorii	Bacteria; Proteobacteria; Gammaproteobacteria; Pseudomonadales; Pseudomonadaceae; Pseudomonas
NZ_QPDT01000010.1	156	66932	67477	0	WP_117182653.1	D2G37_RS14815	GCF_003416215.1	Bro-N domain-containing protein	Bro-N	Pseudomonas cichorii	Bacteria; Proteobacteria; Gammaproteobacteria; Pseudomonadales; Pseudomonadaceae; Pseudomonas
NZ_QPDT01000010.1	156	67818	70061	0	WP_117182654.1	D2G37_RS14820	GCF_003416215.1	type VI secretion system tip protein VgrG	Phage_GPD+Phage_base_V	Pseudomonas cichorii	Bacteria; Proteobacteria; Gammaproteobacteria; Pseudomonadales; Pseudomonadaceae; Pseudomonas
NZ_QPDT01000010.1	156	70065	71363	1	WP_117182655.1	D2G37_RS14825	GCF_003416215.1	VRR-NUC domain-containing protein	VRR_NUC+TM+TM	Pseudomonas cichorii	Bacteria; Proteobacteria; Gammaproteobacteria; Pseudomonadales; Pseudomonadaceae; Pseudomonas
NZ_QPDT01000010.1	156	71373	72497	0	WP_117182773.1	D2G37_RS14830	GCF_003416215.1	DUF3396 domain-containing protein	DUF3396	Pseudomonas cichorii	Bacteria; Proteobacteria; Gammaproteobacteria; Pseudomonadales; Pseudomonadaceae; Pseudomonas
NZ_QPDT01000010.1	156	72565	73827	0	WP_117182656.1	D2G37_RS14835	GCF_003416215.1	DUF1835 domain-containing protein	DUF1835	Pseudomonas cichorii	Bacteria; Proteobacteria; Gammaproteobacteria; Pseudomonadales; Pseudomonadaceae; Pseudomonas
NZ_QPDT01000010.1	156	74103	75410	0	WP_117182657.1	D2G37_RS14840	GCF_003416215.1	MFS transporter	MFS_1+TM+TM	Pseudomonas cichorii	Bacteria; Proteobacteria; Gammaproteobacteria; Pseudomonadales; Pseudomonadaceae; Pseudomonas
NZ_RAHH01000021.1	157	77669	77986	0	WP_147408186.1	D6C13_RS17385	GCF_003602095.1	hypothetical protein		Rahnella woolbedingensis	Bacteria; Proteobacteria; Gammaproteobacteria; Enterobacterales; Yersiniaceae; Rahnella
NZ_RAHH01000021.1	157	78047	78961	0	WP_120133962.1	D6C13_RS17390	GCF_003602095.1	hypothetical protein		Rahnella woolbedingensis	Bacteria; Proteobacteria; Gammaproteobacteria; Enterobacterales; Yersiniaceae; Rahnella
NZ_RAHH01000021.1	157	78951	79964	0	WP_120133963.1	D6C13_RS17395	GCF_003602095.1	DUF3396 domain-containing protein	DUF3396	Rahnella woolbedingensis	Bacteria; Proteobacteria; Gammaproteobacteria; Enterobacterales; Yersiniaceae; Rahnella
NZ_RAHH01000021.1	157	80003	80329	1	WP_120133964.1	D6C13_RS17400	GCF_003602095.1	hypothetical protein		Rahnella woolbedingensis	Bacteria; Proteobacteria; Gammaproteobacteria; Enterobacterales; Yersiniaceae; Rahnella
NZ_RAHH01000021.1	157	81442	82143	0	WP_120133965.1	D6C13_RS17410	GCF_003602095.1	L-ribulose-5-phosphate 4-epimerase	Aldolase_II	Rahnella woolbedingensis	Bacteria; Proteobacteria; Gammaproteobacteria; Enterobacterales; Yersiniaceae; Rahnella
NZ_RAHH01000021.1	157	82137	82997	0	WP_120133966.1	D6C13_RS17415	GCF_003602095.1	L-ribulose-5-phosphate 3-epimerase	AP_endonuc_2	Rahnella woolbedingensis	Bacteria; Proteobacteria; Gammaproteobacteria; Enterobacterales; Yersiniaceae; Rahnella
NZ_RAHH01000021.1	157	82994	83653	0	WP_120133967.1	D6C13_RS17420	GCF_003602095.1	3-keto-L-gulonate-6-phosphate decarboxylase UlaD	OMPdecase	Rahnella woolbedingensis	Bacteria; Proteobacteria; Gammaproteobacteria; Enterobacterales; Yersiniaceae; Rahnella
NZ_RAWD01000028.1	158	18310	19587	0	WP_147446489.1	D7X74_RS42605	GCF_003612065.1	hypothetical protein	HEAT_2	Corallococcus sp. CA047B	Bacteria; Proteobacteria; Deltaproteobacteria; Myxococcales; Cystobacterineae; Myxococcaceae; Corallococcus; unclassified Corallococcus
NZ_RAWD01000028.1	158	19594	20604	0	WP_120532218.1	D7X74_RS07390	GCF_003612065.1	DUF2169 domain-containing protein	DUF2169	Corallococcus sp. CA047B	Bacteria; Proteobacteria; Deltaproteobacteria; Myxococcales; Cystobacterineae; Myxococcaceae; Corallococcus; unclassified Corallococcus
NZ_RAWD01000028.1	158	20739	21632	0	WP_147446490.1	D7X74_RS07395	GCF_003612065.1	hypothetical protein		Corallococcus sp. CA047B	Bacteria; Proteobacteria; Deltaproteobacteria; Myxococcales; Cystobacterineae; Myxococcaceae; Corallococcus; unclassified Corallococcus
NZ_RAWD01000028.1	158	21636	22721	1	WP_120532220.1	D7X74_RS07400	GCF_003612065.1	DUF4150 domain-containing protein	DUF4150+VRR_NUC	Corallococcus sp. CA047B	Bacteria; Proteobacteria; Deltaproteobacteria; Myxococcales; Cystobacterineae; Myxococcaceae; Corallococcus; unclassified Corallococcus
NZ_RAWD01000028.1	158	21636	22721	1	WP_120532220.1	D7X74_RS07400	GCF_003612065.1	DUF4150 domain-containing protein	DUF4150+VRR_NUC	Corallococcus sp. CA047B	Bacteria; Proteobacteria; Deltaproteobacteria; Myxococcales; Cystobacterineae; Myxococcaceae; Corallococcus; unclassified Corallococcus
NZ_RAWD01000028.1	158	22786	23688	0	WP_158620329.1	D7X74_RS07405	GCF_003612065.1	DUF3396 domain-containing protein	DUF3396	Corallococcus sp. CA047B	Bacteria; Proteobacteria; Deltaproteobacteria; Myxococcales; Cystobacterineae; Myxococcaceae; Corallococcus; unclassified Corallococcus
NZ_RAWD01000028.1	158	23728	24279	0	WP_120532222.1	D7X74_RS07410	GCF_003612065.1	hypothetical protein	SP	Corallococcus sp. CA047B	Bacteria; Proteobacteria; Deltaproteobacteria; Myxococcales; Cystobacterineae; Myxococcaceae; Corallococcus; unclassified Corallococcus
NZ_RAWD01000028.1	158	24406	25032	0	WP_120532223.1	D7X74_RS07415	GCF_003612065.1	TetR/AcrR family transcriptional regulator; helix-turn-helix transcriptional regulator	TetR_N+TetR_C_24	Corallococcus sp. CA047B	Bacteria; Proteobacteria; Deltaproteobacteria; Myxococcales; Cystobacterineae; Myxococcaceae; Corallococcus; unclassified Corallococcus
NZ_CP027753.1	159	3370046	3371101	0	WP_124320731.1	C4K04_RS15695	GCF_003851985.1	autotransporter outer membrane beta-barrel domain-containing protein	SP+Autotransporter	Pseudomonas chlororaphis	Bacteria; Proteobacteria; Gammaproteobacteria; Pseudomonadales; Pseudomonadaceae; Pseudomonas
NZ_CP027753.1	159	3371593	3372393	0	WP_124320732.1	C4K04_RS15700	GCF_003851985.1	endonuclease/exonuclease/phosphatase family protein	Exo_endo_phos	Pseudomonas chlororaphis	Bacteria; Proteobacteria; Gammaproteobacteria; Pseudomonadales; Pseudomonadaceae; Pseudomonas
NZ_CP027753.1	159	3372487	3373242	0	WP_124320733.1	C4K04_RS15705	GCF_003851985.1	PIG-L family deacetylase	PIG-L	Pseudomonas chlororaphis	Bacteria; Proteobacteria; Gammaproteobacteria; Pseudomonadales; Pseudomonadaceae; Pseudomonas
NZ_CP027753.1	159	3375998	3377290	1	WP_124320734.1	C4K04_RS15715	GCF_003851985.1	VRR-NUC domain-containing protein	VRR_NUC+TM+TM	Pseudomonas chlororaphis	Bacteria; Proteobacteria; Gammaproteobacteria; Pseudomonadales; Pseudomonadaceae; Pseudomonas
NZ_CP027753.1	159	3377303	3378427	0	WP_124320735.1	C4K04_RS15720	GCF_003851985.1	DUF3396 domain-containing protein	DUF3396	Pseudomonas chlororaphis	Bacteria; Proteobacteria; Gammaproteobacteria; Pseudomonadales; Pseudomonadaceae; Pseudomonas
NZ_CP027753.1	159	3378538	3379302	0	WP_124323062.1	C4K04_RS15725	GCF_003851985.1	DUF1911 domain-containing protein	DUF1910+DUF1911	Pseudomonas chlororaphis	Bacteria; Proteobacteria; Gammaproteobacteria; Pseudomonadales; Pseudomonadaceae; Pseudomonas
NZ_CP027753.1	159	3379633	3379896	0	WP_124320736.1	C4K04_RS15730	GCF_003851985.1	short-chain dehydrogenase		Pseudomonas chlororaphis	Bacteria; Proteobacteria; Gammaproteobacteria; Pseudomonadales; Pseudomonadaceae; Pseudomonas
NZ_CP027758.1	160	1133893	1134672	0	WP_124399418.1	C4J99_RS05040	GCF_003852025.1	peroxide stress protein YaaA	H2O2_YaaD	Pseudomonas synxantha	Bacteria; Proteobacteria; Gammaproteobacteria; Pseudomonadales; Pseudomonadaceae; Pseudomonas
NZ_CP027758.1	160	1134835	1135683	0	WP_124399419.1	C4J99_RS05045	GCF_003852025.1	type IVB secretion system protein IcmH/DotU	DotU	Pseudomonas synxantha	Bacteria; Proteobacteria; Gammaproteobacteria; Pseudomonadales; Pseudomonadaceae; Pseudomonas
NZ_CP027758.1	160	1135825	1136931	0	WP_124399420.1	C4J99_RS05050	GCF_003852025.1	DUF3396 domain-containing protein	DUF3396	Pseudomonas synxantha	Bacteria; Proteobacteria; Gammaproteobacteria; Pseudomonadales; Pseudomonadaceae; Pseudomonas
NZ_CP027758.1	160	1138077	1139018	1	WP_124399421.1	C4J99_RS05060	GCF_003852025.1	VRR-NUC domain-containing protein	VRR_NUC	Pseudomonas synxantha	Bacteria; Proteobacteria; Gammaproteobacteria; Pseudomonadales; Pseudomonadaceae; Pseudomonas
NZ_CP027758.1	160	1139056	1139409	0	WP_124399422.1	C4J99_RS05065	GCF_003852025.1	hypothetical protein		Pseudomonas synxantha	Bacteria; Proteobacteria; Gammaproteobacteria; Pseudomonadales; Pseudomonadaceae; Pseudomonas
NZ_CP027758.1	160	1142035	1143159	0	WP_124399423.1	C4J99_RS05075	GCF_003852025.1	polysaccharide deacetylase family protein	SP+Polysacc_deac_1	Pseudomonas synxantha	Bacteria; Proteobacteria; Gammaproteobacteria; Pseudomonadales; Pseudomonadaceae; Pseudomonas
NZ_CP027758.1	160	1143499	1144893	0	WP_057021503.1	C4J99_RS05080	GCF_003852025.1	PhoH family protein	PIN_4+PhoH	Pseudomonas synxantha	Bacteria; Proteobacteria; Gammaproteobacteria; Pseudomonadales; Pseudomonadaceae; Pseudomonas
NZ_QTOL01000018.1	161	77828	78748	0	WP_124482302.1	DF145_RS21195	GCF_003853255.1	retron St85 family RNA-directed DNA polymerase	RVT_1	Burkholderia stagnalis	Bacteria; Proteobacteria; Betaproteobacteria; Burkholderiales; Burkholderiaceae; Burkholderia; Burkholderia cepacia complex
NZ_QTOL01000018.1	161	78738	79805	0	WP_124482304.1	DF145_RS21200	GCF_003853255.1	retron St85 family effector protein		Burkholderia stagnalis	Bacteria; Proteobacteria; Betaproteobacteria; Burkholderiales; Burkholderiaceae; Burkholderia; Burkholderia cepacia complex
NZ_QTOL01000018.1	161	80080	81168	0	WP_124482306.1	DF145_RS21205	GCF_003853255.1	DUF3396 domain-containing protein	DUF3396	Burkholderia stagnalis	Bacteria; Proteobacteria; Betaproteobacteria; Burkholderiales; Burkholderiaceae; Burkholderia; Burkholderia cepacia complex
NZ_QTOL01000018.1	161	81174	81878	1	WP_124482308.1	DF145_RS21210	GCF_003853255.1	VRR-NUC domain-containing protein	VRR_NUC	Burkholderia stagnalis	Bacteria; Proteobacteria; Betaproteobacteria; Burkholderiales; Burkholderiaceae; Burkholderia; Burkholderia cepacia complex
NZ_QTOL01000018.1	161	81875	82384	0	WP_124482310.1	DF145_RS21215	GCF_003853255.1	PAAR domain-containing protein	PAAR_motif	Burkholderia stagnalis	Bacteria; Proteobacteria; Betaproteobacteria; Burkholderiales; Burkholderiaceae; Burkholderia; Burkholderia cepacia complex
NZ_QTOL01000018.1	161	82599	82850	0	WP_157381171.1	DF145_RS21220	GCF_003853255.1	ogr/Delta-like zinc finger family protein	Ogr_Delta	Burkholderia stagnalis	Bacteria; Proteobacteria; Betaproteobacteria; Burkholderiales; Burkholderiaceae; Burkholderia; Burkholderia cepacia complex
NZ_QTOL01000018.1	161	82847	83803	0	WP_124482312.1	DF145_RS21225	GCF_003853255.1	hypothetical protein	DUF4407	Burkholderia stagnalis	Bacteria; Proteobacteria; Betaproteobacteria; Burkholderiales; Burkholderiaceae; Burkholderia; Burkholderia cepacia complex
NZ_QTRI01000006.1	162	367326	368252	0	WP_124467430.1	DF045_RS11910	GCF_003853765.1	sugar kinase	PfkB	Burkholderia cepacia	Bacteria; Proteobacteria; Betaproteobacteria; Burkholderiales; Burkholderiaceae; Burkholderia; Burkholderia cepacia complex
NZ_QTRI01000006.1	162	368256	369617	0	WP_021159783.1	DF045_RS11915	GCF_003853765.1	30S ribosomal protein S12 methylthiotransferase RimO	UPF0004+Radical_SAM+TRAM_2	Burkholderia cepacia	Bacteria; Proteobacteria; Betaproteobacteria; Burkholderiales; Burkholderiaceae; Burkholderia; Burkholderia cepacia complex
NZ_QTRI01000006.1	162	371477	372664	0	WP_124467432.1	DF045_RS11935	GCF_003853765.1	DUF3396 domain-containing protein	DUF3396	Burkholderia cepacia	Bacteria; Proteobacteria; Betaproteobacteria; Burkholderiales; Burkholderiaceae; Burkholderia; Burkholderia cepacia complex
NZ_QTRI01000006.1	162	372661	374007	1	WP_124467434.1	DF045_RS11940	GCF_003853765.1	hypothetical protein	VRR_NUC	Burkholderia cepacia	Bacteria; Proteobacteria; Betaproteobacteria; Burkholderiales; Burkholderiaceae; Burkholderia; Burkholderia cepacia complex
NZ_QTRI01000006.1	162	374011	376341	0	WP_124467436.1	DF045_RS11945	GCF_003853765.1	type VI secretion system tip protein VgrG	Phage_GPD+Phage_base_V+Gp5_C	Burkholderia cepacia	Bacteria; Proteobacteria; Betaproteobacteria; Burkholderiales; Burkholderiaceae; Burkholderia; Burkholderia cepacia complex
NZ_QTRI01000006.1	162	376433	376951	0	WP_048021124.1	DF045_RS11950	GCF_003853765.1	Hcp family type VI secretion system effector	T6SS_HCP	Burkholderia cepacia	Bacteria; Proteobacteria; Betaproteobacteria; Burkholderiales; Burkholderiaceae; Burkholderia; Burkholderia cepacia complex
NZ_QTRI01000006.1	162	378051	378572	0	WP_124467438.1	DF045_RS11960	GCF_003853765.1	hypothetical protein	SP	Burkholderia cepacia	Bacteria; Proteobacteria; Betaproteobacteria; Burkholderiales; Burkholderiaceae; Burkholderia; Burkholderia cepacia complex
NZ_LAEI01000019.1	163	1	494	0	WP_128580561.1	TW89_RS03495	GCF_001618065.1	DUF2345 domain-containing protein	DUF2345	Neisseria flavescens	Bacteria; Proteobacteria; Betaproteobacteria; Neisseriales; Neisseriaceae; Neisseria
NZ_LAEI01000019.1	163	505	1629	1	WP_128580562.1	TW89_RS03500	GCF_001618065.1	VRR-NUC domain-containing protein	VRR_NUC+TM+TM	Neisseria flavescens	Bacteria; Proteobacteria; Betaproteobacteria; Neisseriales; Neisseriaceae; Neisseria
NZ_LAEI01000019.1	163	1725	2936	0	WP_128580563.1	TW89_RS03505	GCF_001618065.1	DUF3396 domain-containing protein	DUF3396	Neisseria flavescens	Bacteria; Proteobacteria; Betaproteobacteria; Neisseriales; Neisseriaceae; Neisseria
NZ_LAEI01000019.1	163	2929	3078	0	WP_164836689.1	TW89_RS11690	GCF_001618065.1	hypothetical protein		Neisseria flavescens	Bacteria; Proteobacteria; Betaproteobacteria; Neisseriales; Neisseriaceae; Neisseria
NZ_LAEI01000019.1	163	3112	5565	0	WP_128580564.1	TW89_RS03510	GCF_001618065.1	RHS domain-containing protein	RHS_repeat+RHS_repeat+RHS_repeat+RHS_repeat+RHS_repeat+RHS_repeat+RHS	Neisseria flavescens	Bacteria; Proteobacteria; Betaproteobacteria; Neisseriales; Neisseriaceae; Neisseria
NZ_CP028291.1	164	593881	594219	0	WP_128098973.1	C8234_RS01425	GCF_003029705.1	PAAR domain-containing protein	PAAR_motif	Acidovorax avenae subsp. avenae	Bacteria; Proteobacteria; Betaproteobacteria; Burkholderiales; Comamonadaceae; Acidovorax
NZ_CP028291.1	164	594228	594824	0	WP_128098972.1	C8234_RS01430	GCF_003029705.1	DUF4123 domain-containing protein	DUF4123	Acidovorax avenae subsp. avenae	Bacteria; Proteobacteria; Betaproteobacteria; Burkholderiales; Comamonadaceae; Acidovorax
NZ_CP028291.1	164	594831	595232	0	WP_128098971.1	C8234_RS01435	GCF_003029705.1	hypothetical protein		Acidovorax avenae subsp. avenae	Bacteria; Proteobacteria; Betaproteobacteria; Burkholderiales; Comamonadaceae; Acidovorax
NZ_CP028291.1	164	595229	595975	1	WP_128098970.1	C8234_RS01440	GCF_003029705.1	hypothetical protein	VRR_NUC+Pal1	Acidovorax avenae subsp. avenae	Bacteria; Proteobacteria; Betaproteobacteria; Burkholderiales; Comamonadaceae; Acidovorax
NZ_CP028291.1	164	596003	597082	0	WP_208942488.1	C8234_RS01445	GCF_003029705.1	DUF3396 domain-containing protein	DUF3396	Acidovorax avenae subsp. avenae	Bacteria; Proteobacteria; Betaproteobacteria; Burkholderiales; Comamonadaceae; Acidovorax
NZ_CP028291.1	164	597107	597808	0	WP_128098969.1	C8234_RS01450	GCF_003029705.1	hypothetical protein		Acidovorax avenae subsp. avenae	Bacteria; Proteobacteria; Betaproteobacteria; Burkholderiales; Comamonadaceae; Acidovorax
NZ_CP028291.1	164	597876	598670	0	WP_128098968.1	C8234_RS01455	GCF_003029705.1	hypothetical protein		Acidovorax avenae subsp. avenae	Bacteria; Proteobacteria; Betaproteobacteria; Burkholderiales; Comamonadaceae; Acidovorax
NZ_SAUF01000005.1	165	907	1311	0	WP_128293448.1	EO094_RS14210	GCF_004023665.1	DUF2169 domain-containing protein	DUF2169	Afifella aestuarii	Bacteria; Proteobacteria; Alphaproteobacteria; Hyphomicrobiales; Afifellaceae; Afifella
NZ_SAUF01000005.1	165	1974	2486	0	WP_128293453.1	EO094_RS14220	GCF_004023665.1	DUF4150 domain-containing protein	DUF4150	Afifella aestuarii	Bacteria; Proteobacteria; Alphaproteobacteria; Hyphomicrobiales; Afifellaceae; Afifella
NZ_SAUF01000005.1	165	2631	3416	1	WP_128293456.1	EO094_RS14225	GCF_004023665.1	hypothetical protein	SP	Afifella aestuarii	Bacteria; Proteobacteria; Alphaproteobacteria; Hyphomicrobiales; Afifellaceae; Afifella
NZ_SAUF01000005.1	165	3440	4426	0	WP_164879673.1	EO094_RS14230	GCF_004023665.1	DUF3396 domain-containing protein	DUF3396	Afifella aestuarii	Bacteria; Proteobacteria; Alphaproteobacteria; Hyphomicrobiales; Afifellaceae; Afifella
NZ_SAUF01000005.1	165	4644	4790	0	WP_164879674.1	EO094_RS18500	GCF_004023665.1	hypothetical protein		Afifella aestuarii	Bacteria; Proteobacteria; Alphaproteobacteria; Hyphomicrobiales; Afifellaceae; Afifella
NZ_SAUF01000005.1	165	4881	5960	0	WP_128293460.1	EO094_RS14235	GCF_004023665.1	hypothetical protein		Afifella aestuarii	Bacteria; Proteobacteria; Alphaproteobacteria; Hyphomicrobiales; Afifellaceae; Afifella
NZ_CP025781.1	166	28519	28755	0	WP_130104754.1	C1H71_RS00160	GCF_004194535.1	hypothetical protein	SP	Iodobacter fluviatilis	Bacteria; Proteobacteria; Betaproteobacteria; Neisseriales; Chromobacteriaceae; Iodobacter
NZ_CP025781.1	166	29032	30666	0	WP_130104755.1	C1H71_RS00165	GCF_004194535.1	acid phosphatase	SP+Phosphoesterase	Iodobacter fluviatilis	Bacteria; Proteobacteria; Betaproteobacteria; Neisseriales; Chromobacteriaceae; Iodobacter
NZ_CP025781.1	166	30942	33800	0	WP_130104756.1	C1H71_RS00170	GCF_004194535.1	type VI secretion system tip protein VgrG	Phage_GPD+Phage_base_V+T6SS_Vgr+DUF2345	Iodobacter fluviatilis	Bacteria; Proteobacteria; Betaproteobacteria; Neisseriales; Chromobacteriaceae; Iodobacter
NZ_CP025781.1	166	33813	34703	1	WP_130104757.1	C1H71_RS00175	GCF_004194535.1	VRR-NUC domain-containing protein	VRR_NUC+TM+TM	Iodobacter fluviatilis	Bacteria; Proteobacteria; Betaproteobacteria; Neisseriales; Chromobacteriaceae; Iodobacter
NZ_CP025781.1	166	33813	34703	1	WP_130104757.1	C1H71_RS00175	GCF_004194535.1	VRR-NUC domain-containing protein	VRR_NUC+TM+TM	Iodobacter fluviatilis	Bacteria; Proteobacteria; Betaproteobacteria; Neisseriales; Chromobacteriaceae; Iodobacter
NZ_CP025781.1	166	34700	35923	0	WP_130104758.1	C1H71_RS00180	GCF_004194535.1	DUF3396 domain-containing protein	DUF3396	Iodobacter fluviatilis	Bacteria; Proteobacteria; Betaproteobacteria; Neisseriales; Chromobacteriaceae; Iodobacter
NZ_CP025781.1	166	36032	36736	0	WP_223145948.1	C1H71_RS20865	GCF_004194535.1	hypothetical protein	PLDc	Iodobacter fluviatilis	Bacteria; Proteobacteria; Betaproteobacteria; Neisseriales; Chromobacteriaceae; Iodobacter
NZ_CP025781.1	166	36655	37983	0	WP_130104759.1	C1H71_RS00190	GCF_004194535.1	group II intron reverse transcriptase/maturase	RVT_1+GIIM	Iodobacter fluviatilis	Bacteria; Proteobacteria; Betaproteobacteria; Neisseriales; Chromobacteriaceae; Iodobacter
NZ_PUJX01000033.1	167	41841	42113	0	WP_088374998.1	C5468_RS21555	GCF_004348775.1	PAAR domain-containing protein	PAAR_motif	Photorhabdus luminescens subsp. mexicana	Bacteria; Proteobacteria; Gammaproteobacteria; Enterobacterales; Morganellaceae; Photorhabdus
NZ_PUJX01000033.1	167	42117	43268	0	WP_132348080.1	C5468_RS21560	GCF_004348775.1	DUF3396 domain-containing protein	DUF3396	Photorhabdus luminescens subsp. mexicana	Bacteria; Proteobacteria; Gammaproteobacteria; Enterobacterales; Morganellaceae; Photorhabdus
NZ_PUJX01000033.1	167	43306	44457	0	WP_132348082.1	C5468_RS21565	GCF_004348775.1	DUF3396 domain-containing protein	DUF3396	Photorhabdus luminescens subsp. mexicana	Bacteria; Proteobacteria; Gammaproteobacteria; Enterobacterales; Morganellaceae; Photorhabdus
NZ_PUJX01000033.1	167	44472	45424	1	WP_132348084.1	C5468_RS21570	GCF_004348775.1	VRR-NUC domain-containing protein	VRR_NUC+TM+TM	Photorhabdus luminescens subsp. mexicana	Bacteria; Proteobacteria; Gammaproteobacteria; Enterobacterales; Morganellaceae; Photorhabdus
NZ_SMSC01000003.1	168	122931	123497	0	WP_133510454.1	E1958_RS02495	GCF_004359955.1	bifunctional pyr operon transcriptional regulator/uracil phosphoribosyltransferase PyrR	Pribosyltran	Candidatus Thiosymbion oneisti	Bacteria; Proteobacteria; Gammaproteobacteria; Chromatiales; Chromatiaceae; Candidatus Thiosymbion
NZ_SMSC01000003.1	168	123604	124539	0	WP_133510455.1	E1958_RS02500	GCF_004359955.1	DUF3396 domain-containing protein	DUF3396	Candidatus Thiosymbion oneisti	Bacteria; Proteobacteria; Gammaproteobacteria; Chromatiales; Chromatiaceae; Candidatus Thiosymbion
NZ_SMSC01000003.1	168	124541	125476	0	WP_133510456.1	E1958_RS02505	GCF_004359955.1	DUF3396 domain-containing protein	TM+DUF3396	Candidatus Thiosymbion oneisti	Bacteria; Proteobacteria; Gammaproteobacteria; Chromatiales; Chromatiaceae; Candidatus Thiosymbion
NZ_SMSC01000003.1	168	125489	126640	1	WP_133510457.1	E1958_RS20745	GCF_004359955.1	DUF4150 domain-containing protein	DUF4150	Candidatus Thiosymbion oneisti	Bacteria; Proteobacteria; Gammaproteobacteria; Chromatiales; Chromatiaceae; Candidatus Thiosymbion
NZ_SMSC01000003.1	168	126631	127680	0	WP_133510458.1	E1958_RS02515	GCF_004359955.1	hypothetical protein	SP+ketoacyl-synt+TM	Candidatus Thiosymbion oneisti	Bacteria; Proteobacteria; Gammaproteobacteria; Chromatiales; Chromatiaceae; Candidatus Thiosymbion
NZ_SMSC01000003.1	168	127677	128690	0	WP_133510459.1	E1958_RS02520	GCF_004359955.1	DUF2169 domain-containing protein	DUF2169	Candidatus Thiosymbion oneisti	Bacteria; Proteobacteria; Gammaproteobacteria; Chromatiales; Chromatiaceae; Candidatus Thiosymbion
NZ_SMSC01000003.1	168	128761	129165	0	WP_133510460.1	E1958_RS02525	GCF_004359955.1	Holliday junction resolvase RuvX	RuvX	Candidatus Thiosymbion oneisti	Bacteria; Proteobacteria; Gammaproteobacteria; Chromatiales; Chromatiaceae; Candidatus Thiosymbion
NZ_SNSR01000016.1	169	137873	138052	0	WP_134256314.1	E3D36_RS16960	GCF_004374695.1	hypothetical protein	TM	Burkholderia cepacia	Bacteria; Proteobacteria; Betaproteobacteria; Burkholderiales; Burkholderiaceae; Burkholderia; Burkholderia cepacia complex
NZ_SNSR01000016.1	169	138034	138375	0	WP_134256315.1	E3D36_RS16965	GCF_004374695.1	hypothetical protein	TM+TM+TM	Burkholderia cepacia	Bacteria; Proteobacteria; Betaproteobacteria; Burkholderiales; Burkholderiaceae; Burkholderia; Burkholderia cepacia complex
NZ_SNSR01000016.1	169	138615	139163	0	WP_134256316.1	E3D36_RS16970	GCF_004374695.1	PAAR domain-containing protein	PAAR_motif	Burkholderia cepacia	Bacteria; Proteobacteria; Betaproteobacteria; Burkholderiales; Burkholderiaceae; Burkholderia; Burkholderia cepacia complex
NZ_SNSR01000016.1	169	139160	139921	1	WP_134256317.1	E3D36_RS16975	GCF_004374695.1	VRR-NUC domain-containing protein	VRR_NUC	Burkholderia cepacia	Bacteria; Proteobacteria; Betaproteobacteria; Burkholderiales; Burkholderiaceae; Burkholderia; Burkholderia cepacia complex
NZ_SNSR01000016.1	169	139927	141039	0	WP_134256318.1	E3D36_RS16980	GCF_004374695.1	DUF3396 domain-containing protein	DUF3396	Burkholderia cepacia	Bacteria; Proteobacteria; Betaproteobacteria; Burkholderiales; Burkholderiaceae; Burkholderia; Burkholderia cepacia complex
NZ_SNSR01000016.1	169	141532	142251	0	WP_134256319.1	E3D36_RS16985	GCF_004374695.1	SOS response-associated peptidase family protein	SRAP	Burkholderia cepacia	Bacteria; Proteobacteria; Betaproteobacteria; Burkholderiales; Burkholderiaceae; Burkholderia; Burkholderia cepacia complex
NZ_SNSR01000016.1	169	142229	143215	0	WP_134256320.1	E3D36_RS16990	GCF_004374695.1	type IA DNA topoisomerase		Burkholderia cepacia	Bacteria; Proteobacteria; Betaproteobacteria; Burkholderiales; Burkholderiaceae; Burkholderia; Burkholderia cepacia complex
NZ_SSMQ01000031.1	170	103385	104605	0	WP_136932001.1	E8A74_RS27240	GCF_005144585.1	hypothetical protein	SP	Polyangium fumosum	Bacteria; Proteobacteria; Deltaproteobacteria; Myxococcales; Sorangiineae; Polyangiaceae; Polyangium
NZ_SSMQ01000031.1	170	104659	105975	0	WP_136932002.1	E8A74_RS27245	GCF_005144585.1	tetratricopeptide repeat protein	SP+TPR_14	Polyangium fumosum	Bacteria; Proteobacteria; Deltaproteobacteria; Myxococcales; Sorangiineae; Polyangiaceae; Polyangium
NZ_SSMQ01000031.1	170	106091	107065	0	WP_136932003.1	E8A74_RS27250	GCF_005144585.1	DUF3396 domain-containing protein	DUF3396	Polyangium fumosum	Bacteria; Proteobacteria; Deltaproteobacteria; Myxococcales; Sorangiineae; Polyangiaceae; Polyangium
NZ_SSMQ01000031.1	170	107084	108373	1	WP_136932004.1	E8A74_RS27255	GCF_005144585.1	hypothetical protein	VRR_NUC	Polyangium fumosum	Bacteria; Proteobacteria; Deltaproteobacteria; Myxococcales; Sorangiineae; Polyangiaceae; Polyangium
NZ_SSMQ01000031.1	170	109075	109752	0	WP_136932005.1	E8A74_RS27260	GCF_005144585.1	phage late control D family protein	Phage_GPD	Polyangium fumosum	Bacteria; Proteobacteria; Deltaproteobacteria; Myxococcales; Sorangiineae; Polyangiaceae; Polyangium
NZ_SSMQ01000031.1	170	110698	112659	0	WP_136932006.1	E8A74_RS27265	GCF_005144585.1	hypothetical protein	SP+Cu-binding_MopE+PPC	Polyangium fumosum	Bacteria; Proteobacteria; Deltaproteobacteria; Myxococcales; Sorangiineae; Polyangiaceae; Polyangium
NZ_SSMQ01000031.1	170	112781	114427	0	WP_136932007.1	E8A74_RS27270	GCF_005144585.1	ATP-binding cassette domain-containing protein	TM+TM+TM+TM+TM+TM+TM+ABC_tran	Polyangium fumosum	Bacteria; Proteobacteria; Deltaproteobacteria; Myxococcales; Sorangiineae; Polyangiaceae; Polyangium
NZ_SCMX01000016.1	171	40615	42108	0	WP_137924716.1	FFS21_RS10185	GCF_005503625.1	type VI secretion system contractile sheath large subunit	VipB+VipB_2	Cupriavidus sp. 2SB	Bacteria; Proteobacteria; Betaproteobacteria; Burkholderiales; Burkholderiaceae; Cupriavidus; unclassified Cupriavidus
NZ_SCMX01000016.1	171	42218	42703	0	WP_137924717.1	FFS21_RS10190	GCF_005503625.1	Hcp family type VI secretion system effector	T6SS_HCP	Cupriavidus sp. 2SB	Bacteria; Proteobacteria; Betaproteobacteria; Burkholderiales; Burkholderiaceae; Cupriavidus; unclassified Cupriavidus
NZ_SCMX01000016.1	171	42849	45470	0	WP_171020368.1	FFS21_RS10195	GCF_005503625.1	type VI secretion system tip protein VgrG	Phage_GPD+Phage_base_V+T6SS_Vgr+DUF2345	Cupriavidus sp. 2SB	Bacteria; Proteobacteria; Betaproteobacteria; Burkholderiales; Burkholderiaceae; Cupriavidus; unclassified Cupriavidus
NZ_SCMX01000016.1	171	45485	46669	1	WP_137924719.1	FFS21_RS10200	GCF_005503625.1	VRR-NUC domain-containing protein	VRR_NUC+TM+TM	Cupriavidus sp. 2SB	Bacteria; Proteobacteria; Betaproteobacteria; Burkholderiales; Burkholderiaceae; Cupriavidus; unclassified Cupriavidus
NZ_SCMX01000016.1	171	46694	47893	0	WP_137924720.1	FFS21_RS10205	GCF_005503625.1	DUF3396 domain-containing protein	DUF3396	Cupriavidus sp. 2SB	Bacteria; Proteobacteria; Betaproteobacteria; Burkholderiales; Burkholderiaceae; Cupriavidus; unclassified Cupriavidus
NZ_SCMX01000016.1	171	47937	49136	0	WP_171020369.1	FFS21_RS10210	GCF_005503625.1	DUF3396 domain-containing protein	DUF3396	Cupriavidus sp. 2SB	Bacteria; Proteobacteria; Betaproteobacteria; Burkholderiales; Burkholderiaceae; Cupriavidus; unclassified Cupriavidus
NZ_SCMX01000016.1	171	49255	49536	0	WP_137924722.1	FFS21_RS10215	GCF_005503625.1	PAAR domain-containing protein	PAAR_motif	Cupriavidus sp. 2SB	Bacteria; Proteobacteria; Betaproteobacteria; Burkholderiales; Burkholderiaceae; Cupriavidus; unclassified Cupriavidus
NZ_SCMX01000027.1	172	45735	46829	0	WP_137925560.1	FFS21_RS14905	GCF_005503625.1	hypothetical protein	SP	Cupriavidus sp. 2SB	Bacteria; Proteobacteria; Betaproteobacteria; Burkholderiales; Burkholderiaceae; Cupriavidus; unclassified Cupriavidus
NZ_SCMX01000027.1	172	46939	48261	0	WP_137925561.1	FFS21_RS14910	GCF_005503625.1	FAD-binding oxidoreductase	DAO	Cupriavidus sp. 2SB	Bacteria; Proteobacteria; Betaproteobacteria; Burkholderiales; Burkholderiaceae; Cupriavidus; unclassified Cupriavidus
NZ_SCMX01000027.1	172	48492	51173	0	WP_137925562.1	FFS21_RS14915	GCF_005503625.1	type VI secretion system tip protein VgrG	Phage_GPD+Phage_base_V+T6SS_Vgr+DUF2345	Cupriavidus sp. 2SB	Bacteria; Proteobacteria; Betaproteobacteria; Burkholderiales; Burkholderiaceae; Cupriavidus; unclassified Cupriavidus
NZ_SCMX01000027.1	172	51181	52461	1	WP_137925563.1	FFS21_RS14920	GCF_005503625.1	hypothetical protein	VRR_NUC+TM	Cupriavidus sp. 2SB	Bacteria; Proteobacteria; Betaproteobacteria; Burkholderiales; Burkholderiaceae; Cupriavidus; unclassified Cupriavidus
NZ_SCMX01000027.1	172	52486	53760	0	WP_137925564.1	FFS21_RS14925	GCF_005503625.1	DUF3396 domain-containing protein	DUF3396	Cupriavidus sp. 2SB	Bacteria; Proteobacteria; Betaproteobacteria; Burkholderiales; Burkholderiaceae; Cupriavidus; unclassified Cupriavidus
NZ_SCMX01000027.1	172	53988	55280	0	WP_137925565.1	FFS21_RS14930	GCF_005503625.1	MFS transporter	TM+MFS_1+TM	Cupriavidus sp. 2SB	Bacteria; Proteobacteria; Betaproteobacteria; Burkholderiales; Burkholderiaceae; Cupriavidus; unclassified Cupriavidus
NZ_SCMX01000027.1	172	55546	56556	0	WP_137925566.1	FFS21_RS14935	GCF_005503625.1	ABC transporter substrate-binding protein	SP+NMT1	Cupriavidus sp. 2SB	Bacteria; Proteobacteria; Betaproteobacteria; Burkholderiales; Burkholderiaceae; Cupriavidus; unclassified Cupriavidus
NZ_SCMX01000111.1	173	9588	9767	0	WP_137928258.1	FFS21_RS29755	GCF_005503625.1	CsbD family protein	CsbD	Cupriavidus sp. 2SB	Bacteria; Proteobacteria; Betaproteobacteria; Burkholderiales; Burkholderiaceae; Cupriavidus; unclassified Cupriavidus
NZ_SCMX01000111.1	173	9909	10430	0	WP_137928259.1	FFS21_RS29760	GCF_005503625.1	type VI secretion system baseplate subunit TssE	GPW_gp25	Cupriavidus sp. 2SB	Bacteria; Proteobacteria; Betaproteobacteria; Burkholderiales; Burkholderiaceae; Cupriavidus; unclassified Cupriavidus
NZ_SCMX01000111.1	173	10913	13648	0	WP_137928260.1	FFS21_RS29765	GCF_005503625.1	type VI secretion system ATPase TssH	Clp_N+AAA+AAA_lid_9+AAA_2+ClpB_D2-small	Cupriavidus sp. 2SB	Bacteria; Proteobacteria; Betaproteobacteria; Burkholderiales; Burkholderiaceae; Cupriavidus; unclassified Cupriavidus
NZ_SCMX01000111.1	173	13663	14847	1	WP_137928261.1	FFS21_RS29770	GCF_005503625.1	VRR-NUC domain-containing protein	VRR_NUC+TM+TM	Cupriavidus sp. 2SB	Bacteria; Proteobacteria; Betaproteobacteria; Burkholderiales; Burkholderiaceae; Cupriavidus; unclassified Cupriavidus
NZ_SCMX01000111.1	173	14883	16070	0	WP_171020525.1	FFS21_RS29775	GCF_005503625.1	DUF3396 domain-containing protein	DUF3396	Cupriavidus sp. 2SB	Bacteria; Proteobacteria; Betaproteobacteria; Burkholderiales; Burkholderiaceae; Cupriavidus; unclassified Cupriavidus
NZ_CP036282.1	174	1503796	1504482	0	WP_142810383.1	EXZ61_RS07055	GCF_006974105.1	TetR/AcrR family transcriptional regulator C-terminal domain-containing protein	TetR_N+TetR_C_1	Rhodoferax sediminis	Bacteria; Proteobacteria; Betaproteobacteria; Burkholderiales; Comamonadaceae; Rhodoferax
NZ_CP036282.1	174	1504510	1505022	0	WP_142810385.1	EXZ61_RS07060	GCF_006974105.1	GNAT family N-acetyltransferase	Acetyltransf_3	Rhodoferax sediminis	Bacteria; Proteobacteria; Betaproteobacteria; Burkholderiales; Comamonadaceae; Rhodoferax
NZ_CP036282.1	174	1505495	1508398	0	WP_142810387.1	EXZ61_RS07065	GCF_006974105.1	type VI secretion system tip protein VgrG	Phage_GPD+Phage_base_V+T6SS_Vgr+DUF2345	Rhodoferax sediminis	Bacteria; Proteobacteria; Betaproteobacteria; Burkholderiales; Comamonadaceae; Rhodoferax
NZ_CP036282.1	174	1508403	1509539	1	WP_142810389.1	EXZ61_RS07070	GCF_006974105.1	VRR-NUC domain-containing protein	VRR_NUC+TM	Rhodoferax sediminis	Bacteria; Proteobacteria; Betaproteobacteria; Burkholderiales; Comamonadaceae; Rhodoferax
NZ_CP036282.1	174	1508403	1509539	1	WP_142810389.1	EXZ61_RS07070	GCF_006974105.1	VRR-NUC domain-containing protein	VRR_NUC+TM	Rhodoferax sediminis	Bacteria; Proteobacteria; Betaproteobacteria; Burkholderiales; Comamonadaceae; Rhodoferax
NZ_CP036282.1	174	1509578	1510882	0	WP_142810391.1	EXZ61_RS07075	GCF_006974105.1	DUF3396 domain-containing protein	DUF3396+DUF3396	Rhodoferax sediminis	Bacteria; Proteobacteria; Betaproteobacteria; Burkholderiales; Comamonadaceae; Rhodoferax
NZ_CP036282.1	174	1510889	1511050	0	WP_168224717.1	EXZ61_RS21885	GCF_006974105.1	hypothetical protein		Rhodoferax sediminis	Bacteria; Proteobacteria; Betaproteobacteria; Burkholderiales; Comamonadaceae; Rhodoferax
NZ_CP036282.1	174	1511090	1511491	0	WP_142810393.1	EXZ61_RS07080	GCF_006974105.1	helix-turn-helix domain-containing protein	HTH_38	Rhodoferax sediminis	Bacteria; Proteobacteria; Betaproteobacteria; Burkholderiales; Comamonadaceae; Rhodoferax
NZ_MIFU01000014.1	175	43	426	1	WP_143007486.1	BHC62_RS04685	GCF_001855215.1	VRR-NUC domain-containing protein	VRR_NUC	Pseudomonas sp. 06C 126	Bacteria; Proteobacteria; Gammaproteobacteria; Pseudomonadales; Pseudomonadaceae; Pseudomonas
NZ_ML660109.1	176	101233	101640	0	WP_142929701.1	FKG94_RS25075	GCF_007004655.1	peptide-methionine (R)-S-oxide reductase MsrB	SelR	Exilibacterium tricleocarpae	Bacteria; Proteobacteria; Gammaproteobacteria; Cellvibrionales; Cellvibrionaceae; Exilibacterium
NZ_ML660109.1	176	101627	102373	0	WP_179957812.1	FKG94_RS25080	GCF_007004655.1	DUF1499 domain-containing protein	SP+TM+TM+DUF1499	Exilibacterium tricleocarpae	Bacteria; Proteobacteria; Gammaproteobacteria; Cellvibrionales; Cellvibrionaceae; Exilibacterium
NZ_ML660109.1	176	102485	103261	0	WP_142929703.1	FKG94_RS25085	GCF_007004655.1	hypothetical protein	SP+Cytochrom_B562	Exilibacterium tricleocarpae	Bacteria; Proteobacteria; Gammaproteobacteria; Cellvibrionales; Cellvibrionaceae; Exilibacterium
NZ_ML660109.1	176	104175	104624	1	WP_142929704.1	FKG94_RS25100	GCF_007004655.1	hypothetical protein		Exilibacterium tricleocarpae	Bacteria; Proteobacteria; Gammaproteobacteria; Cellvibrionales; Cellvibrionaceae; Exilibacterium
NZ_ML660109.1	176	104175	104624	1	WP_142929704.1	FKG94_RS25100	GCF_007004655.1	hypothetical protein		Exilibacterium tricleocarpae	Bacteria; Proteobacteria; Gammaproteobacteria; Cellvibrionales; Cellvibrionaceae; Exilibacterium
NZ_ML660109.1	176	106574	107857	0	WP_142929705.1	FKG94_RS25105	GCF_007004655.1	beta-propeller fold lactonase family protein	SP+Lactonase+Lactonase	Exilibacterium tricleocarpae	Bacteria; Proteobacteria; Gammaproteobacteria; Cellvibrionales; Cellvibrionaceae; Exilibacterium
NZ_ML660109.1	176	107933	108691	0	WP_142929706.1	FKG94_RS25110	GCF_007004655.1	thioesterase II family protein	Thioesterase	Exilibacterium tricleocarpae	Bacteria; Proteobacteria; Gammaproteobacteria; Cellvibrionales; Cellvibrionaceae; Exilibacterium
NZ_ML660109.1	176	108773	112568	0	WP_142929707.1	FKG94_RS25115	GCF_007004655.1	AMP-binding protein	AMP-binding+AMP-binding_C_2+PP-binding+ketoacyl-synt+Ketoacyl-synt_C+KAsynt_C_assoc+Acyl_transf_1	Exilibacterium tricleocarpae	Bacteria; Proteobacteria; Gammaproteobacteria; Cellvibrionales; Cellvibrionaceae; Exilibacterium
NZ_VMHM01000008.1	177	3791	5044	0	WP_144091875.1	FPQ15_RS06555	GCF_007559145.1	DUF3396 domain-containing protein	DUF3396	Gilliamella apicola	Bacteria; Proteobacteria; Gammaproteobacteria; Orbales; Orbaceae; Gilliamella
NZ_VMHM01000008.1	177	5063	6316	0	WP_144091876.1	FPQ15_RS06560	GCF_007559145.1	DUF3396 domain-containing protein	DUF3396	Gilliamella apicola	Bacteria; Proteobacteria; Gammaproteobacteria; Orbales; Orbaceae; Gilliamella
NZ_VMHM01000008.1	177	6897	7007	0	WP_144091877.1	FPQ15_RS06565	GCF_007559145.1	hypothetical protein	DUF3703	Gilliamella apicola	Bacteria; Proteobacteria; Gammaproteobacteria; Orbales; Orbaceae; Gilliamella
NZ_VMHM01000008.1	177	7019	8014	1	WP_144091878.1	FPQ15_RS06570	GCF_007559145.1	VRR-NUC domain-containing protein	VRR_NUC	Gilliamella apicola	Bacteria; Proteobacteria; Gammaproteobacteria; Orbales; Orbaceae; Gilliamella
NZ_VMHM01000008.1	177	8049	9302	0	WP_144091879.1	FPQ15_RS06575	GCF_007559145.1	DUF3396 domain-containing protein	DUF3396	Gilliamella apicola	Bacteria; Proteobacteria; Gammaproteobacteria; Orbales; Orbaceae; Gilliamella
NZ_VMHM01000008.1	177	9321	10574	0	WP_144091880.1	FPQ15_RS06580	GCF_007559145.1	DUF3396 domain-containing protein	DUF3396	Gilliamella apicola	Bacteria; Proteobacteria; Gammaproteobacteria; Orbales; Orbaceae; Gilliamella
NZ_VMHM01000008.1	177	10593	11846	0	WP_144091881.1	FPQ15_RS06585	GCF_007559145.1	DUF3396 domain-containing protein	DUF3396	Gilliamella apicola	Bacteria; Proteobacteria; Gammaproteobacteria; Orbales; Orbaceae; Gilliamella
NZ_LUVY01000014.1	178	60376	60933	0	WP_105946865.1	A0O30_RS13630	GCF_002992185.1	NUDIX hydrolase	Nudix_N_2+NUDIX	Pseudomonas sp. LLC-1	Bacteria; Proteobacteria; Gammaproteobacteria; Pseudomonadales; Pseudomonadaceae; Pseudomonas
NZ_LUVY01000014.1	178	60959	61513	0	WP_105946866.1	A0O30_RS13635	GCF_002992185.1	L,D-transpeptidase family protein	SP+YkuD	Pseudomonas sp. LLC-1	Bacteria; Proteobacteria; Gammaproteobacteria; Pseudomonadales; Pseudomonadaceae; Pseudomonas
NZ_LUVY01000014.1	178	61548	62654	0	WP_105946867.1	A0O30_RS13640	GCF_002992185.1	DUF3396 domain-containing protein	DUF3396	Pseudomonas sp. LLC-1	Bacteria; Proteobacteria; Gammaproteobacteria; Pseudomonadales; Pseudomonadaceae; Pseudomonas
NZ_LUVY01000014.1	178	62647	63957	1	WP_146232454.1	A0O30_RS13645	GCF_002992185.1	VRR-NUC domain-containing protein	VRR_NUC	Pseudomonas sp. LLC-1	Bacteria; Proteobacteria; Gammaproteobacteria; Pseudomonadales; Pseudomonadaceae; Pseudomonas
NZ_LUVY01000014.1	178	66601	67260	0	WP_105946869.1	A0O30_RS13655	GCF_002992185.1	general secretion pathway protein GspN	SP	Pseudomonas sp. LLC-1	Bacteria; Proteobacteria; Gammaproteobacteria; Pseudomonadales; Pseudomonadaceae; Pseudomonas
NZ_LUVY01000014.1	178	67257	67643	0	WP_105946870.1	A0O30_RS13660	GCF_002992185.1	type II secretion system protein GspM	SP	Pseudomonas sp. LLC-1	Bacteria; Proteobacteria; Gammaproteobacteria; Pseudomonadales; Pseudomonadaceae; Pseudomonas
NZ_LUVY01000014.1	178	67640	68716	0	WP_105947039.1	A0O30_RS13665	GCF_002992185.1	type II secretion system protein GspL	T2SSL+GspL_C	Pseudomonas sp. LLC-1	Bacteria; Proteobacteria; Gammaproteobacteria; Pseudomonadales; Pseudomonadaceae; Pseudomonas
NZ_VLKW01000001.1	179	558412	560427	0	WP_145872905.1	IP92_RS02385	GCF_007830495.1	acetate--CoA ligase	ACAS_N+AMP-binding+AMP-binding_C	Massilia flava	Bacteria; Proteobacteria; Betaproteobacteria; Burkholderiales; Oxalobacteraceae; Massilia
NZ_VLKW01000001.1	179	560924	562333	0	WP_199271811.1	IP92_RS02395	GCF_007830495.1	HNH endonuclease	SP+HNH_2	Massilia flava	Bacteria; Proteobacteria; Betaproteobacteria; Burkholderiales; Oxalobacteraceae; Massilia
NZ_VLKW01000001.1	179	562574	563149	0	WP_145872906.1	IP92_RS02400	GCF_007830495.1	PAAR domain-containing protein	PAAR_motif	Massilia flava	Bacteria; Proteobacteria; Betaproteobacteria; Burkholderiales; Oxalobacteraceae; Massilia
NZ_VLKW01000001.1	179	563191	563874	1	WP_145873293.1	IP92_RS02405	GCF_007830495.1	VRR-NUC domain-containing protein	VRR_NUC	Massilia flava	Bacteria; Proteobacteria; Betaproteobacteria; Burkholderiales; Oxalobacteraceae; Massilia
NZ_VLKW01000001.1	179	563191	563874	1	WP_145873293.1	IP92_RS02405	GCF_007830495.1	VRR-NUC domain-containing protein	VRR_NUC	Massilia flava	Bacteria; Proteobacteria; Betaproteobacteria; Burkholderiales; Oxalobacteraceae; Massilia
NZ_VLKW01000001.1	179	563879	564958	0	WP_145872907.1	IP92_RS02410	GCF_007830495.1	DUF3396 domain-containing protein	DUF3396	Massilia flava	Bacteria; Proteobacteria; Betaproteobacteria; Burkholderiales; Oxalobacteraceae; Massilia
NZ_VLKW01000001.1	179	565326	565790	0	WP_145872908.1	IP92_RS02415	GCF_007830495.1	VOC family protein	SP+Glyoxalase_6	Massilia flava	Bacteria; Proteobacteria; Betaproteobacteria; Burkholderiales; Oxalobacteraceae; Massilia
NZ_VLKW01000001.1	179	565815	566294	0	WP_145872909.1	IP92_RS02420	GCF_007830495.1	VOC family protein	3-dmu-9_3-mt	Massilia flava	Bacteria; Proteobacteria; Betaproteobacteria; Burkholderiales; Oxalobacteraceae; Massilia
NZ_QFVF01000322.1	180	1	245	1	WP_148746413.1	DJ537_RS25310	GCF_008120925.1	VRR-NUC domain-containing protein	VRR_NUC	Enterobacter hormaechei	Bacteria; Proteobacteria; Gammaproteobacteria; Enterobacterales; Enterobacteriaceae; Enterobacter; Enterobacter cloacae complex
NZ_AMZS01000061.1	181	18491	20368	0	WP_009514893.1	ACINWC323_RS03190	GCF_000314615.1	potassium transporter Kup	SP+K_trans	Acinetobacter sp. WC-323	Bacteria; Proteobacteria; Gammaproteobacteria; Pseudomonadales; Moraxellaceae; Acinetobacter; Acinetobacter calcoaceticus/baumannii complex
NZ_AMZS01000061.1	181	20709	20894	0	WP_009514884.1	ACINWC323_RS03185	GCF_000314615.1	hypothetical protein	SP	Acinetobacter sp. WC-323	Bacteria; Proteobacteria; Gammaproteobacteria; Pseudomonadales; Moraxellaceae; Acinetobacter; Acinetobacter calcoaceticus/baumannii complex
NZ_AMZS01000061.1	181	21083	23899	0	WP_009514881.1	ACINWC323_RS03180	GCF_000314615.1	type VI secretion system tip protein VgrG	Phage_GPD+Phage_base_V+T6SS_Vgr+DUF2345	Acinetobacter sp. WC-323	Bacteria; Proteobacteria; Gammaproteobacteria; Pseudomonadales; Moraxellaceae; Acinetobacter; Acinetobacter calcoaceticus/baumannii complex
NZ_AMZS01000061.1	181	24083	25204	1	WP_150953095.1	ACINWC323_RS03175	GCF_000314615.1	VRR-NUC domain-containing protein	VRR_NUC	Acinetobacter sp. WC-323	Bacteria; Proteobacteria; Gammaproteobacteria; Pseudomonadales; Moraxellaceae; Acinetobacter; Acinetobacter calcoaceticus/baumannii complex
NZ_AMZS01000061.1	181	25227	26462	0	WP_009514908.1	ACINWC323_RS03170	GCF_000314615.1	DUF3396 domain-containing protein	DUF3396	Acinetobacter sp. WC-323	Bacteria; Proteobacteria; Gammaproteobacteria; Pseudomonadales; Moraxellaceae; Acinetobacter; Acinetobacter calcoaceticus/baumannii complex
NZ_AMZS01000061.1	181	26558	27244	0	WP_009514950.1	ACINWC323_RS03165	GCF_000314615.1	DUF1851 domain-containing protein	GAD-like+DUF1851	Acinetobacter sp. WC-323	Bacteria; Proteobacteria; Gammaproteobacteria; Pseudomonadales; Moraxellaceae; Acinetobacter; Acinetobacter calcoaceticus/baumannii complex
NZ_AMZS01000061.1	181	27397	28536	0	WP_032881687.1	ACINWC323_RS03160	GCF_000314615.1	hypothetical protein		Acinetobacter sp. WC-323	Bacteria; Proteobacteria; Gammaproteobacteria; Pseudomonadales; Moraxellaceae; Acinetobacter; Acinetobacter calcoaceticus/baumannii complex
NZ_VXDB01000054.1	182	940	2091	0	WP_150526861.1	F0155_RS22715	GCF_008711325.1	hypothetical protein		Roseibium sediminis	Bacteria; Proteobacteria; Alphaproteobacteria; Hyphomicrobiales; Stappiaceae; Roseibium
NZ_VXDB01000054.1	182	2175	3299	0	WP_150526862.1	F0155_RS22720	GCF_008711325.1	hypothetical protein		Roseibium sediminis	Bacteria; Proteobacteria; Alphaproteobacteria; Hyphomicrobiales; Stappiaceae; Roseibium
NZ_VXDB01000054.1	182	3437	3706	0	WP_150526863.1	F0155_RS22725	GCF_008711325.1	hypothetical protein		Roseibium sediminis	Bacteria; Proteobacteria; Alphaproteobacteria; Hyphomicrobiales; Stappiaceae; Roseibium
NZ_VXDB01000054.1	182	3706	4737	1	WP_150526864.1	F0155_RS22730	GCF_008711325.1	DUF4150 domain-containing protein	DUF4150	Roseibium sediminis	Bacteria; Proteobacteria; Alphaproteobacteria; Hyphomicrobiales; Stappiaceae; Roseibium
NZ_VXDB01000054.1	182	4746	5732	0	WP_150526865.1	F0155_RS22735	GCF_008711325.1	DUF3396 domain-containing protein	DUF3396	Roseibium sediminis	Bacteria; Proteobacteria; Alphaproteobacteria; Hyphomicrobiales; Stappiaceae; Roseibium
NZ_VXDB01000054.1	182	5732	6316	0	WP_150526866.1	F0155_RS22740	GCF_008711325.1	hypothetical protein		Roseibium sediminis	Bacteria; Proteobacteria; Alphaproteobacteria; Hyphomicrobiales; Stappiaceae; Roseibium
NZ_VXDB01000054.1	182	6325	7353	0	WP_150526867.1	F0155_RS22745	GCF_008711325.1	DUF2169 domain-containing protein	DUF2169	Roseibium sediminis	Bacteria; Proteobacteria; Alphaproteobacteria; Hyphomicrobiales; Stappiaceae; Roseibium
NZ_BKNL01000004.1	183	89302	89613	0	WP_121774341.1	GBN82_RS02475	GCF_008993855.1	DUF4179 domain-containing protein	SP	Acinetobacter bereziniae	Bacteria; Proteobacteria; Gammaproteobacteria; Pseudomonadales; Moraxellaceae; Acinetobacter
NZ_BKNL01000004.1	183	89752	91260	0	WP_151780673.1	GBN82_RS02480	GCF_008993855.1	glutamate--tRNA ligase	tRNA-synt_1c+Anticodon_2	Acinetobacter bereziniae	Bacteria; Proteobacteria; Gammaproteobacteria; Pseudomonadales; Moraxellaceae; Acinetobacter
NZ_BKNL01000004.1	183	91656	92738	0	WP_151780674.1	GBN82_RS02495	GCF_008993855.1	DUF3396 domain-containing protein	DUF3396	Acinetobacter bereziniae	Bacteria; Proteobacteria; Gammaproteobacteria; Pseudomonadales; Moraxellaceae; Acinetobacter
NZ_BKNL01000004.1	183	92752	93723	1	WP_151780675.1	GBN82_RS02500	GCF_008993855.1	hypothetical protein	TM	Acinetobacter bereziniae	Bacteria; Proteobacteria; Gammaproteobacteria; Pseudomonadales; Moraxellaceae; Acinetobacter
NZ_BKNL01000004.1	183	93733	94128	0	WP_005034369.1	GBN82_RS02505	GCF_008993855.1	hypothetical protein		Acinetobacter bereziniae	Bacteria; Proteobacteria; Gammaproteobacteria; Pseudomonadales; Moraxellaceae; Acinetobacter
NZ_BKNL01000004.1	183	94205	94900	0	WP_151780676.1	GBN82_RS02510	GCF_008993855.1	hypothetical protein	TM	Acinetobacter bereziniae	Bacteria; Proteobacteria; Gammaproteobacteria; Pseudomonadales; Moraxellaceae; Acinetobacter
NZ_BKNL01000004.1	183	95194	95535	0	WP_004825419.1	GBN82_RS02515	GCF_008993855.1	hypothetical protein	Oxidored_q4+DUF4379	Acinetobacter bereziniae	Bacteria; Proteobacteria; Gammaproteobacteria; Pseudomonadales; Moraxellaceae; Acinetobacter
NZ_JOKH01000005.1	184	161439	161582	0	WP_161787437.1	GZ78_RS29585	GCF_000722635.1	hypothetical protein		Endozoicomonas numazuensis	Bacteria; Proteobacteria; Gammaproteobacteria; Oceanospirillales; Endozoicomonadaceae; Endozoicomonas
NZ_JOKH01000005.1	184	161576	162019	0	WP_034839969.1	GZ78_RS19680	GCF_000722635.1	N-acetylmuramoyl-L-alanine amidase	Amidase_2	Endozoicomonas numazuensis	Bacteria; Proteobacteria; Gammaproteobacteria; Oceanospirillales; Endozoicomonadaceae; Endozoicomonas
NZ_JOKH01000005.1	184	162036	162311	0	WP_034839971.1	GZ78_RS19685	GCF_000722635.1	hypothetical protein	Flagellin_C+TM	Endozoicomonas numazuensis	Bacteria; Proteobacteria; Gammaproteobacteria; Oceanospirillales; Endozoicomonadaceae; Endozoicomonas
NZ_JOKH01000005.1	184	162742	163113	1	WP_152558843.1	GZ78_RS19690	GCF_000722635.1	VRR-NUC domain-containing protein	VRR_NUC	Endozoicomonas numazuensis	Bacteria; Proteobacteria; Gammaproteobacteria; Oceanospirillales; Endozoicomonadaceae; Endozoicomonas
NZ_JOKH01000005.1	184	162742	163113	1	WP_152558843.1	GZ78_RS19690	GCF_000722635.1	VRR-NUC domain-containing protein	VRR_NUC	Endozoicomonas numazuensis	Bacteria; Proteobacteria; Gammaproteobacteria; Oceanospirillales; Endozoicomonadaceae; Endozoicomonas
NZ_JOKH01000005.1	184	163134	164066	0	WP_034839974.1	GZ78_RS19695	GCF_000722635.1	DUF3396 domain-containing protein	DUF3396	Endozoicomonas numazuensis	Bacteria; Proteobacteria; Gammaproteobacteria; Oceanospirillales; Endozoicomonadaceae; Endozoicomonas
NZ_JOKH01000005.1	184	164856	165629	0	WP_034839977.1	GZ78_RS19700	GCF_000722635.1	heme ABC transporter ATP-binding protein	ABC_tran	Endozoicomonas numazuensis	Bacteria; Proteobacteria; Gammaproteobacteria; Oceanospirillales; Endozoicomonadaceae; Endozoicomonas
NZ_JOKH01000005.1	184	165629	166678	0	WP_034839979.1	GZ78_RS19705	GCF_000722635.1	iron chelate uptake ABC transporter family permease subunit	SP+FecCD	Endozoicomonas numazuensis	Bacteria; Proteobacteria; Gammaproteobacteria; Oceanospirillales; Endozoicomonadaceae; Endozoicomonas
NZ_JPGM01000005.1	185	91181	92203	0	WP_034197133.1	GQ57_RS03990	GCF_000731655.1	glucokinase	Glucokinase	Burkholderia sp. MSh2	Bacteria; Proteobacteria; Betaproteobacteria; Burkholderiales; Burkholderiaceae; Burkholderia
NZ_JPGM01000005.1	185	93366	93617	0	WP_081896574.1	GQ57_RS38845	GCF_000731655.1	PAAR domain-containing protein	PAAR_motif	Burkholderia sp. MSh2	Bacteria; Proteobacteria; Betaproteobacteria; Burkholderiales; Burkholderiaceae; Burkholderia
NZ_JPGM01000005.1	185	93637	96396	0	WP_081896575.1	GQ57_RS04000	GCF_000731655.1	type VI secretion system tip protein VgrG	Phage_GPD+Phage_base_V+T6SS_Vgr+DUF2345	Burkholderia sp. MSh2	Bacteria; Proteobacteria; Betaproteobacteria; Burkholderiales; Burkholderiaceae; Burkholderia
NZ_JPGM01000005.1	185	96396	97781	1	WP_152603185.1	GQ57_RS41310	GCF_000731655.1	VRR-NUC domain-containing protein	VRR_NUC	Burkholderia sp. MSh2	Bacteria; Proteobacteria; Betaproteobacteria; Burkholderiales; Burkholderiaceae; Burkholderia
NZ_JPGM01000005.1	185	97793	99043	0	WP_081896576.1	GQ57_RS38850	GCF_000731655.1	DUF3396 domain-containing protein	DUF3396	Burkholderia sp. MSh2	Bacteria; Proteobacteria; Betaproteobacteria; Burkholderiales; Burkholderiaceae; Burkholderia
NZ_JPGM01000005.1	185	99767	101737	0	WP_034197136.1	GQ57_RS04015	GCF_000731655.1	APC family permease	AA_permease_2+TM	Burkholderia sp. MSh2	Bacteria; Proteobacteria; Betaproteobacteria; Burkholderiales; Burkholderiaceae; Burkholderia
NZ_JPGM01000005.1	185	101801	101959	0	WP_160257500.1	GQ57_RS42980	GCF_000731655.1	hypothetical protein	TM	Burkholderia sp. MSh2	Bacteria; Proteobacteria; Betaproteobacteria; Burkholderiales; Burkholderiaceae; Burkholderia
NZ_KN150945.1	186	81572	82003	0	WP_038785463.1	DP57_RS31925	GCF_000757165.1	type VI secretion system baseplate subunit TssE	GPW_gp25	Burkholderia pseudomallei	Bacteria; Proteobacteria; Betaproteobacteria; Burkholderiales; Burkholderiaceae; Burkholderia; pseudomallei group
NZ_KN150945.1	186	82016	82678	0	WP_038785464.1	DP57_RS31930	GCF_000757165.1	DotU family type IV/VI secretion system protein	DotU	Burkholderia pseudomallei	Bacteria; Proteobacteria; Betaproteobacteria; Burkholderiales; Burkholderiaceae; Burkholderia; pseudomallei group
NZ_KN150945.1	186	82675	84021	0	WP_038785465.1	DP57_RS31935	GCF_000757165.1	type VI secretion system baseplate subunit TssK	T6SS_VasE	Burkholderia pseudomallei	Bacteria; Proteobacteria; Betaproteobacteria; Burkholderiales; Burkholderiaceae; Burkholderia; pseudomallei group
NZ_KN150945.1	186	88277	89239	1	WP_154234757.1	DP57_RS41340	GCF_000757165.1	hypothetical protein	VRR_NUC+TM	Burkholderia pseudomallei	Bacteria; Proteobacteria; Betaproteobacteria; Burkholderiales; Burkholderiaceae; Burkholderia; pseudomallei group
NZ_KN150945.1	186	88277	89239	1	WP_154234757.1	DP57_RS41340	GCF_000757165.1	hypothetical protein	VRR_NUC+TM	Burkholderia pseudomallei	Bacteria; Proteobacteria; Betaproteobacteria; Burkholderiales; Burkholderiaceae; Burkholderia; pseudomallei group
NZ_KN150945.1	186	89252	90277	0	WP_080298165.1	DP57_RS40350	GCF_000757165.1	DUF3396 domain-containing protein	DUF3396	Burkholderia pseudomallei	Bacteria; Proteobacteria; Betaproteobacteria; Burkholderiales; Burkholderiaceae; Burkholderia; pseudomallei group
NZ_KN150945.1	186	91022	93349	0	WP_052101722.1	DP57_RS31950	GCF_000757165.1	type VI secretion system tip protein VgrG	Phage_GPD+T6SS_Vgr+DUF2345	Burkholderia pseudomallei	Bacteria; Proteobacteria; Betaproteobacteria; Burkholderiales; Burkholderiaceae; Burkholderia; pseudomallei group
NZ_KN150945.1	186	93368	96172	0	WP_195760472.1	DP57_RS32685	GCF_000757165.1	lytic transglycosylase domain-containing protein	Glyco_hydro_19	Burkholderia pseudomallei	Bacteria; Proteobacteria; Betaproteobacteria; Burkholderiales; Burkholderiaceae; Burkholderia; pseudomallei group
NZ_RQVU01000027.1	187	194372	196024	0	WP_152327619.1	EH227_RS22540	GCF_009295505.1	malate dehydrogenase (quinone)	Mqo	Rouxiella chamberiensis	Bacteria; Proteobacteria; Gammaproteobacteria; Enterobacterales; Yersiniaceae; Rouxiella
NZ_RQVU01000027.1	187	196381	197427	0	WP_152327620.1	EH227_RS22545	GCF_009295505.1	DUF3396 domain-containing protein	DUF3396	Rouxiella chamberiensis	Bacteria; Proteobacteria; Gammaproteobacteria; Enterobacterales; Yersiniaceae; Rouxiella
NZ_RQVU01000027.1	187	197482	198681	0	WP_152327621.1	EH227_RS22550	GCF_009295505.1	DUF3396 domain-containing protein	DUF3396	Rouxiella chamberiensis	Bacteria; Proteobacteria; Gammaproteobacteria; Enterobacterales; Yersiniaceae; Rouxiella
NZ_RQVU01000027.1	187	198694	200004	1	WP_152327622.1	EH227_RS22555	GCF_009295505.1	VRR-NUC domain-containing protein	VRR_NUC	Rouxiella chamberiensis	Bacteria; Proteobacteria; Gammaproteobacteria; Enterobacterales; Yersiniaceae; Rouxiella
NZ_RQVU01000027.1	187	200006	200299	0	WP_152327625.1	EH227_RS22560	GCF_009295505.1	hypothetical protein		Rouxiella chamberiensis	Bacteria; Proteobacteria; Gammaproteobacteria; Enterobacterales; Yersiniaceae; Rouxiella
NZ_VUAZ01000063.1	188	2713	4320	0	WP_152746642.1	F0169_RS11920	GCF_009296165.1	glycosyltransferase family 39 protein	TM+TM+TM+TM+TM+TM+TM+TM+TM+TM+TM+TM+TM	Pseudomonas kitaguniensis	Bacteria; Proteobacteria; Gammaproteobacteria; Pseudomonadales; Pseudomonadaceae; Pseudomonas
NZ_VUAZ01000063.1	188	4548	6476	0	WP_172979418.1	F0169_RS11925	GCF_009296165.1	methyl-accepting chemotaxis protein	TM+HBM+TM+HAMP+MCPsignal	Pseudomonas kitaguniensis	Bacteria; Proteobacteria; Gammaproteobacteria; Pseudomonadales; Pseudomonadaceae; Pseudomonas
NZ_VUAZ01000063.1	188	7107	8243	0	WP_152746644.1	F0169_RS11930	GCF_009296165.1	DUF3396 domain-containing protein	DUF3396	Pseudomonas kitaguniensis	Bacteria; Proteobacteria; Gammaproteobacteria; Pseudomonadales; Pseudomonadaceae; Pseudomonas
NZ_VUAZ01000063.1	188	8244	9548	1	WP_152746645.1	F0169_RS11935	GCF_009296165.1	VRR-NUC domain-containing protein	DUF3146+VRR_NUC+TM+TM	Pseudomonas kitaguniensis	Bacteria; Proteobacteria; Gammaproteobacteria; Pseudomonadales; Pseudomonadaceae; Pseudomonas
NZ_VUAZ01000063.1	188	9550	11796	0	WP_152746646.1	F0169_RS11940	GCF_009296165.1	type VI secretion system tip protein VgrG	Phage_GPD+Phage_base_V	Pseudomonas kitaguniensis	Bacteria; Proteobacteria; Gammaproteobacteria; Pseudomonadales; Pseudomonadaceae; Pseudomonas
NZ_VUAZ01000063.1	188	12231	12503	0	WP_058413133.1	F0169_RS11950	GCF_009296165.1	oxidative damage protection protein	Iron_traffic	Pseudomonas kitaguniensis	Bacteria; Proteobacteria; Gammaproteobacteria; Pseudomonadales; Pseudomonadaceae; Pseudomonas
NZ_VUAZ01000063.1	188	12500	13567	0	WP_152746647.1	F0169_RS11955	GCF_009296165.1	A/G-specific adenine glycosylase	HhH-GPD+NUDIX_4	Pseudomonas kitaguniensis	Bacteria; Proteobacteria; Gammaproteobacteria; Pseudomonadales; Pseudomonadaceae; Pseudomonas
NZ_WLZX01000007.1	189	72688	73677	0	WP_154753768.1	GK011_RS16370	GCF_009707715.1	DUF3396 domain-containing protein	DUF3396	Erwinia sp. J316	Bacteria; Proteobacteria; Gammaproteobacteria; Enterobacterales; Erwiniaceae; Erwinia; unclassified Erwinia
NZ_WLZX01000007.1	189	73712	74698	0	WP_154753769.1	GK011_RS16375	GCF_009707715.1	DUF3396 domain-containing protein	DUF3396	Erwinia sp. J316	Bacteria; Proteobacteria; Gammaproteobacteria; Enterobacterales; Erwiniaceae; Erwinia; unclassified Erwinia
NZ_WLZX01000007.1	189	74733	75722	0	WP_154753770.1	GK011_RS16380	GCF_009707715.1	DUF3396 domain-containing protein	DUF3396	Erwinia sp. J316	Bacteria; Proteobacteria; Gammaproteobacteria; Enterobacterales; Erwiniaceae; Erwinia; unclassified Erwinia
NZ_WLZX01000007.1	189	75775	76866	1	WP_154753890.1	GK011_RS16385	GCF_009707715.1	DUF4150 domain-containing protein	DUF4150+TM	Erwinia sp. J316	Bacteria; Proteobacteria; Gammaproteobacteria; Enterobacterales; Erwiniaceae; Erwinia; unclassified Erwinia
NZ_WLZX01000007.1	189	76896	77882	0	WP_154753771.1	GK011_RS16390	GCF_009707715.1	DUF3396 domain-containing protein	DUF3396	Erwinia sp. J316	Bacteria; Proteobacteria; Gammaproteobacteria; Enterobacterales; Erwiniaceae; Erwinia; unclassified Erwinia
NZ_WLZX01000007.1	189	77917	78903	0	WP_154753772.1	GK011_RS16395	GCF_009707715.1	DUF3396 domain-containing protein	DUF3396	Erwinia sp. J316	Bacteria; Proteobacteria; Gammaproteobacteria; Enterobacterales; Erwiniaceae; Erwinia; unclassified Erwinia
NZ_WLZX01000007.1	189	79084	79923	0	WP_154753891.1	GK011_RS16400	GCF_009707715.1	MurR/RpiR family transcriptional regulator	HTH_6+SIS	Erwinia sp. J316	Bacteria; Proteobacteria; Gammaproteobacteria; Enterobacterales; Erwiniaceae; Erwinia; unclassified Erwinia
NZ_ASRX01000040.1	190	1	1854	1	WP_156041091.1	CAP_RS45425	GCF_000601485.1	type VI secretion system tip protein VgrG	Phage_base_V+DUF2345+VRR_NUC	Chondromyces apiculatus DSM 436	Bacteria; Proteobacteria; Deltaproteobacteria; Myxococcales; Sorangiineae; Polyangiaceae; Chondromyces
NZ_ASRX01000040.1	190	1936	3084	0	WP_197041324.1	CAP_RS23950	GCF_000601485.1	DUF3396 domain-containing protein	TM+DUF3396	Chondromyces apiculatus DSM 436	Bacteria; Proteobacteria; Deltaproteobacteria; Myxococcales; Sorangiineae; Polyangiaceae; Chondromyces
NZ_ASRX01000040.1	190	3118	4731	0	WP_044245096.1	CAP_RS23955	GCF_000601485.1	hypothetical protein	SP	Chondromyces apiculatus DSM 436	Bacteria; Proteobacteria; Deltaproteobacteria; Myxococcales; Sorangiineae; Polyangiaceae; Chondromyces
NZ_ASRX01000040.1	190	5034	6269	0	WP_044245011.1	CAP_RS52525	GCF_000601485.1	hypothetical protein		Chondromyces apiculatus DSM 436	Bacteria; Proteobacteria; Deltaproteobacteria; Myxococcales; Sorangiineae; Polyangiaceae; Chondromyces
NZ_CP012159.1	191	2699733	2702600	0	WP_050430193.1	CMC5_RS10040	GCF_001189295.1	type VI secretion system tip protein VgrG	Phage_GPD+Phage_base_V+VRR_NUC	Chondromyces crocatus	Bacteria; Proteobacteria; Deltaproteobacteria; Myxococcales; Sorangiineae; Polyangiaceae; Chondromyces
NZ_CP012159.1	191	2702661	2703659	0	WP_050430194.1	CMC5_RS10045	GCF_001189295.1	DUF3396 domain-containing protein	DUF3396	Chondromyces crocatus	Bacteria; Proteobacteria; Deltaproteobacteria; Myxococcales; Sorangiineae; Polyangiaceae; Chondromyces
NZ_CP012159.1	191	2704007	2705305	0	WP_218920247.1	CMC5_RS46865	GCF_001189295.1	PGRS family protein		Chondromyces crocatus	Bacteria; Proteobacteria; Deltaproteobacteria; Myxococcales; Sorangiineae; Polyangiaceae; Chondromyces
NZ_CP012159.1	191	2705697	2708657	1	WP_156338412.1	CMC5_RS10055	GCF_001189295.1	type VI secretion system tip protein VgrG	Phage_GPD+Phage_base_V+VRR_NUC	Chondromyces crocatus	Bacteria; Proteobacteria; Deltaproteobacteria; Myxococcales; Sorangiineae; Polyangiaceae; Chondromyces
NZ_CP012159.1	191	2708716	2709714	0	WP_050430197.1	CMC5_RS10060	GCF_001189295.1	DUF3396 domain-containing protein	DUF3396	Chondromyces crocatus	Bacteria; Proteobacteria; Deltaproteobacteria; Myxococcales; Sorangiineae; Polyangiaceae; Chondromyces
NZ_CP012159.1	191	2710069	2710266	0	WP_218920248.1	CMC5_RS46870	GCF_001189295.1	hypothetical protein		Chondromyces crocatus	Bacteria; Proteobacteria; Deltaproteobacteria; Myxococcales; Sorangiineae; Polyangiaceae; Chondromyces
NZ_CP012159.1	191	2710479	2710712	0	WP_050430198.1	CMC5_RS46440	GCF_001189295.1	hypothetical protein		Chondromyces crocatus	Bacteria; Proteobacteria; Deltaproteobacteria; Myxococcales; Sorangiineae; Polyangiaceae; Chondromyces
NZ_LMMI01000002.1	192	195551	195976	0	WP_162239520.1	ASF22_RS22775	GCF_001422775.1	hypothetical protein	Ntox15	Methylobacterium sp. Leaf87	Bacteria; Proteobacteria; Alphaproteobacteria; Hyphomicrobiales; Methylobacteriaceae; Methylobacterium
NZ_LMMI01000002.1	192	196096	196287	0	WP_056261193.1	ASF22_RS24475	GCF_001422775.1	DUF3396 domain-containing protein	DUF3396	Methylobacterium sp. Leaf87	Bacteria; Proteobacteria; Alphaproteobacteria; Hyphomicrobiales; Methylobacteriaceae; Methylobacterium
NZ_LMMI01000002.1	192	196281	197024	0	WP_056261195.1	ASF22_RS02785	GCF_001422775.1	DUF3396 domain-containing protein	DUF3396	Methylobacterium sp. Leaf87	Bacteria; Proteobacteria; Alphaproteobacteria; Hyphomicrobiales; Methylobacteriaceae; Methylobacterium
NZ_LMMI01000002.1	192	197021	197350	1	WP_156647593.1	ASF22_RS23580	GCF_001422775.1	hypothetical protein		Methylobacterium sp. Leaf87	Bacteria; Proteobacteria; Alphaproteobacteria; Hyphomicrobiales; Methylobacteriaceae; Methylobacterium
NZ_LMMI01000002.1	192	197387	197908	0	WP_156647594.1	ASF22_RS02790	GCF_001422775.1	hypothetical protein		Methylobacterium sp. Leaf87	Bacteria; Proteobacteria; Alphaproteobacteria; Hyphomicrobiales; Methylobacteriaceae; Methylobacterium
NZ_LMMI01000002.1	192	198009	198479	0	WP_156647597.1	ASF22_RS22780	GCF_001422775.1	DUF4150 domain-containing protein	DUF4150	Methylobacterium sp. Leaf87	Bacteria; Proteobacteria; Alphaproteobacteria; Hyphomicrobiales; Methylobacteriaceae; Methylobacterium
NZ_LMMI01000002.1	192	198443	198730	0	WP_056261205.1	ASF22_RS23585	GCF_001422775.1	DUF4150 domain-containing protein	DUF4150	Methylobacterium sp. Leaf87	Bacteria; Proteobacteria; Alphaproteobacteria; Hyphomicrobiales; Methylobacteriaceae; Methylobacterium
NZ_CM003052.1	193	1106591	1108438	0	WP_039005579.1	XTCCFBP2541_RS04735	GCF_000807145.1	beta-galactosidase	SP+Glyco_hydro_35	Xanthomonas translucens pv. cerealis	Bacteria; Proteobacteria; Gammaproteobacteria; Xanthomonadales; Xanthomonadaceae; Xanthomonas
NZ_CM003052.1	193	1108957	1110408	0	WP_141696428.1	XTCCFBP2541_RS19460	GCF_000807145.1	phosphatidylserine/phosphatidylglycerophosphate/ cardiolipin synthase family protein	PLDc_2+PLDc_2	Xanthomonas translucens pv. cerealis	Bacteria; Proteobacteria; Gammaproteobacteria; Xanthomonadales; Xanthomonadaceae; Xanthomonas
NZ_CM003052.1	193	1110594	1111670	0	WP_039008862.1	XTCCFBP2541_RS19465	GCF_000807145.1	DUF3396 domain-containing protein	DUF3396	Xanthomonas translucens pv. cerealis	Bacteria; Proteobacteria; Gammaproteobacteria; Xanthomonadales; Xanthomonadaceae; Xanthomonas
NZ_CM003052.1	193	1111676	1112167	1	WP_160292279.1	XTCCFBP2541_RS19470	GCF_000807145.1	VRR-NUC domain-containing protein	VRR_NUC	Xanthomonas translucens pv. cerealis	Bacteria; Proteobacteria; Gammaproteobacteria; Xanthomonadales; Xanthomonadaceae; Xanthomonas
NZ_CM003052.1	193	1112383	1112949	0	WP_080763354.1	XTCCFBP2541_RS04745	GCF_000807145.1	PAAR domain-containing protein	PAAR_motif	Xanthomonas translucens pv. cerealis	Bacteria; Proteobacteria; Gammaproteobacteria; Xanthomonadales; Xanthomonadaceae; Xanthomonas
NZ_CM003052.1	193	1114583	1114975	0	WP_039005583.1	XTCCFBP2541_RS21330	GCF_000807145.1	type I toxin-antitoxin system SymE family toxin	SymE_toxin	Xanthomonas translucens pv. cerealis	Bacteria; Proteobacteria; Gammaproteobacteria; Xanthomonadales; Xanthomonadaceae; Xanthomonas
NZ_CM003052.1	193	1115014	1115247	0	WP_039005585.1	XTCCFBP2541_RS04760	GCF_000807145.1	hypothetical protein		Xanthomonas translucens pv. cerealis	Bacteria; Proteobacteria; Gammaproteobacteria; Xanthomonadales; Xanthomonadaceae; Xanthomonas
NZ_WHLX01000002.1	194	221202	221381	0	WP_137928258.1	GA566_RS16925	GCF_009793345.1	CsbD family protein	CsbD	Cupriavidus sp. SW-Y-13	Bacteria; Proteobacteria; Betaproteobacteria; Burkholderiales; Burkholderiaceae; Cupriavidus; unclassified Cupriavidus
NZ_WHLX01000002.1	194	221532	222059	0	WP_202126886.1	GA566_RS16930	GCF_009793345.1	type VI secretion system baseplate subunit TssE	GPW_gp25	Cupriavidus sp. SW-Y-13	Bacteria; Proteobacteria; Betaproteobacteria; Burkholderiales; Burkholderiaceae; Cupriavidus; unclassified Cupriavidus
NZ_WHLX01000002.1	194	222537	225272	0	WP_160473447.1	GA566_RS16935	GCF_009793345.1	type VI secretion system ATPase TssH	Clp_N+AAA+AAA_lid_9+AAA_2+ClpB_D2-small	Cupriavidus sp. SW-Y-13	Bacteria; Proteobacteria; Betaproteobacteria; Burkholderiales; Burkholderiaceae; Cupriavidus; unclassified Cupriavidus
NZ_WHLX01000002.1	194	225287	226465	1	WP_160473448.1	GA566_RS16940	GCF_009793345.1	VRR-NUC domain-containing protein	VRR_NUC+TM+TM	Cupriavidus sp. SW-Y-13	Bacteria; Proteobacteria; Betaproteobacteria; Burkholderiales; Burkholderiaceae; Cupriavidus; unclassified Cupriavidus
NZ_WHLX01000002.1	194	226501	227688	0	WP_160473449.1	GA566_RS16945	GCF_009793345.1	DUF3396 domain-containing protein	DUF3396	Cupriavidus sp. SW-Y-13	Bacteria; Proteobacteria; Betaproteobacteria; Burkholderiales; Burkholderiaceae; Cupriavidus; unclassified Cupriavidus
NZ_WHLX01000002.1	194	227783	230422	0	WP_160473450.1	GA566_RS16950	GCF_009793345.1	type VI secretion system tip protein VgrG	Phage_GPD+Phage_base_V+T6SS_Vgr+DUF2345	Cupriavidus sp. SW-Y-13	Bacteria; Proteobacteria; Betaproteobacteria; Burkholderiales; Burkholderiaceae; Cupriavidus; unclassified Cupriavidus
NZ_WHLX01000002.1	194	230419	231282	0	WP_160473451.1	GA566_RS16955	GCF_009793345.1	hypothetical protein		Cupriavidus sp. SW-Y-13	Bacteria; Proteobacteria; Betaproteobacteria; Burkholderiales; Burkholderiaceae; Cupriavidus; unclassified Cupriavidus
NZ_VNZD01000336.1	195	1	262	1	WP_160537084.1	FQ041_RS25550	GCF_009821025.1	VRR-NUC domain-containing protein	VRR_NUC	Escherichia coli	Bacteria; Proteobacteria; Gammaproteobacteria; Enterobacterales; Enterobacteriaceae; Escherichia
NZ_CP028271.1	196	1646547	1646780	0	WP_160621255.1	C7M51_RS07700	GCF_009914055.1	hypothetical protein		Mixta intestinalis	Bacteria; Proteobacteria; Gammaproteobacteria; Enterobacterales; Erwiniaceae; Mixta
NZ_CP028271.1	196	1646814	1647953	0	WP_208852122.1	C7M51_RS22295	GCF_009914055.1	DUF3396 domain-containing protein	DUF3396	Mixta intestinalis	Bacteria; Proteobacteria; Gammaproteobacteria; Enterobacterales; Erwiniaceae; Mixta
NZ_CP028271.1	196	1647977	1648981	0	WP_208852123.1	C7M51_RS07710	GCF_009914055.1	DUF3396 domain-containing protein	DUF3396	Mixta intestinalis	Bacteria; Proteobacteria; Gammaproteobacteria; Enterobacterales; Erwiniaceae; Mixta
NZ_CP028271.1	196	1649026	1650129	1	WP_160621256.1	C7M51_RS07715	GCF_009914055.1	DUF4150 domain-containing protein	DUF4150	Mixta intestinalis	Bacteria; Proteobacteria; Gammaproteobacteria; Enterobacterales; Erwiniaceae; Mixta
NZ_CP028271.1	196	1650126	1651409	0	WP_160621257.1	C7M51_RS07720	GCF_009914055.1	hypothetical protein		Mixta intestinalis	Bacteria; Proteobacteria; Gammaproteobacteria; Enterobacterales; Erwiniaceae; Mixta
NZ_CP028271.1	196	1651418	1653604	0	WP_160621258.1	C7M51_RS07725	GCF_009914055.1	type VI secretion system tip protein VgrG	Phage_GPD+Phage_base_V+Gp5_C+Gp5_C+Gp5_C	Mixta intestinalis	Bacteria; Proteobacteria; Gammaproteobacteria; Enterobacterales; Erwiniaceae; Mixta
NZ_CP028271.1	196	1654431	1655033	0	WP_160621259.1	C7M51_RS07735	GCF_009914055.1	helix-turn-helix domain-containing protein	HTH_3+Cupin_2	Mixta intestinalis	Bacteria; Proteobacteria; Gammaproteobacteria; Enterobacterales; Erwiniaceae; Mixta
NZ_WUMG01000026.1	197	42625	42966	0	WP_026062371.1	GRX31_RS19155	GCF_009827015.1	PAAR domain-containing protein	PAAR_motif+PAAR_motif	Delftia sp. CH05	Bacteria; Proteobacteria; Betaproteobacteria; Burkholderiales; Comamonadaceae; Delftia
NZ_WUMG01000026.1	197	42973	43581	0	WP_160854242.1	GRX31_RS19160	GCF_009827015.1	DUF4123 domain-containing protein	DUF4123	Delftia sp. CH05	Bacteria; Proteobacteria; Betaproteobacteria; Burkholderiales; Comamonadaceae; Delftia
NZ_WUMG01000026.1	197	43578	43982	0	WP_016453941.1	GRX31_RS19165	GCF_009827015.1	hypothetical protein		Delftia sp. CH05	Bacteria; Proteobacteria; Betaproteobacteria; Burkholderiales; Comamonadaceae; Delftia
NZ_WUMG01000026.1	197	43979	44734	1	WP_160854244.1	GRX31_RS19170	GCF_009827015.1	hypothetical protein		Delftia sp. CH05	Bacteria; Proteobacteria; Betaproteobacteria; Burkholderiales; Comamonadaceae; Delftia
NZ_WUMG01000026.1	197	44766	45860	0	WP_034348083.1	GRX31_RS19175	GCF_009827015.1	DUF3396 domain-containing protein	DUF3396	Delftia sp. CH05	Bacteria; Proteobacteria; Betaproteobacteria; Burkholderiales; Comamonadaceae; Delftia
NZ_WUMG01000026.1	197	45895	46989	0	WP_160854268.1	GRX31_RS19180	GCF_009827015.1	DUF3396 domain-containing protein	DUF3396	Delftia sp. CH05	Bacteria; Proteobacteria; Betaproteobacteria; Burkholderiales; Comamonadaceae; Delftia
NZ_WUMG01000026.1	197	46990	47523	0	WP_160854246.1	GRX31_RS19185	GCF_009827015.1	hypothetical protein		Delftia sp. CH05	Bacteria; Proteobacteria; Betaproteobacteria; Burkholderiales; Comamonadaceae; Delftia
NZ_JASC01000003.1	198	227911	228558	0	WP_025050737.1	Z945_RS0103510	GCF_000622365.1	sulfotransferase family 2 domain-containing protein	Sulfotransfer_2	Sulfitobacter noctilucae	Bacteria; Proteobacteria; Alphaproteobacteria; Rhodobacterales; Roseobacteraceae; Sulfitobacter
NZ_JASC01000003.1	198	228770	229447	0	WP_161634069.1	Z945_RS19965	GCF_000622365.1	Hint domain-containing protein	Hint_2	Sulfitobacter noctilucae	Bacteria; Proteobacteria; Alphaproteobacteria; Rhodobacterales; Roseobacteraceae; Sulfitobacter
NZ_JASC01000003.1	198	229680	230078	0	WP_025050739.1	Z945_RS0103520	GCF_000622365.1	hypothetical protein		Sulfitobacter noctilucae	Bacteria; Proteobacteria; Alphaproteobacteria; Rhodobacterales; Roseobacteraceae; Sulfitobacter
NZ_JASC01000003.1	198	230354	231025	1	WP_161634070.1	Z945_RS19970	GCF_000622365.1	VRR-NUC domain-containing protein	VRR_NUC+TM+TM	Sulfitobacter noctilucae	Bacteria; Proteobacteria; Alphaproteobacteria; Rhodobacterales; Roseobacteraceae; Sulfitobacter
NZ_JASC01000003.1	198	230354	231025	1	WP_161634070.1	Z945_RS19970	GCF_000622365.1	VRR-NUC domain-containing protein	VRR_NUC+TM+TM	Sulfitobacter noctilucae	Bacteria; Proteobacteria; Alphaproteobacteria; Rhodobacterales; Roseobacteraceae; Sulfitobacter
NZ_JASC01000003.1	198	231027	232064	0	WP_025050741.1	Z945_RS0103530	GCF_000622365.1	DUF3396 domain-containing protein	DUF3396	Sulfitobacter noctilucae	Bacteria; Proteobacteria; Alphaproteobacteria; Rhodobacterales; Roseobacteraceae; Sulfitobacter
NZ_JASC01000003.1	198	232159	234360	0	WP_025050742.1	Z945_RS0103535	GCF_000622365.1	enoyl-CoA hydratase/isomerase family protein	ECH_1+3HCDH_N+3HCDH	Sulfitobacter noctilucae	Bacteria; Proteobacteria; Alphaproteobacteria; Rhodobacterales; Roseobacteraceae; Sulfitobacter
NZ_JASC01000003.1	198	234357	234860	0	WP_025050743.1	Z945_RS0103540	GCF_000622365.1	hypothetical protein		Sulfitobacter noctilucae	Bacteria; Proteobacteria; Alphaproteobacteria; Rhodobacterales; Roseobacteraceae; Sulfitobacter
NZ_JHEE01000117.1	199	1	1176	0	WP_052896039.1	DA83_RS27995	GCF_001259595.1	type VI secretion system tip protein VgrG	Phage_base_V	Pseudomonas sp. 250J	Bacteria; Proteobacteria; Gammaproteobacteria; Pseudomonadales; Pseudomonadaceae; Pseudomonas
NZ_JHEE01000117.1	199	1382	2512	1	WP_162232976.1	DA83_RS27155	GCF_001259595.1	VRR-NUC domain-containing protein	VRR_NUC	Pseudomonas sp. 250J	Bacteria; Proteobacteria; Gammaproteobacteria; Pseudomonadales; Pseudomonadaceae; Pseudomonas
NZ_JHEE01000117.1	199	2505	3605	0	WP_082337801.1	DA83_RS27160	GCF_001259595.1	DUF3396 domain-containing protein	DUF3396	Pseudomonas sp. 250J	Bacteria; Proteobacteria; Gammaproteobacteria; Pseudomonadales; Pseudomonadaceae; Pseudomonas
NZ_JHEE01000117.1	199	3616	3873	0	WP_082337802.1	DA83_RS27165	GCF_001259595.1	PAAR domain-containing protein	PAAR_motif+PAAR_motif	Pseudomonas sp. 250J	Bacteria; Proteobacteria; Gammaproteobacteria; Pseudomonadales; Pseudomonadaceae; Pseudomonas
NZ_JHEE01000117.1	199	4531	5580	0	WP_050706461.1	DA83_RS19100	GCF_001259595.1	3-ketoacyl-CoA thiolase	SP+ACP_syn_III+ACP_syn_III_C	Pseudomonas sp. 250J	Bacteria; Proteobacteria; Gammaproteobacteria; Pseudomonadales; Pseudomonadaceae; Pseudomonas
NZ_JACGXO010000005.1	200	303147	303395	0	WP_162700312.1	FHW17_RS16155	GCF_014138335.1	hypothetical protein		Phyllobacterium sp. P30BS-XVII	Bacteria; Proteobacteria; Alphaproteobacteria; Hyphomicrobiales; Phyllobacteriaceae; Phyllobacterium; unclassified Phyllobacterium
NZ_JACGXO010000005.1	200	303401	304429	0	WP_112524840.1	FHW17_RS16160	GCF_014138335.1	DUF2169 domain-containing protein	DUF2169	Phyllobacterium sp. P30BS-XVII	Bacteria; Proteobacteria; Alphaproteobacteria; Hyphomicrobiales; Phyllobacteriaceae; Phyllobacterium; unclassified Phyllobacterium
NZ_JACGXO010000005.1	200	304426	305463	0	WP_112524842.1	FHW17_RS16165	GCF_014138335.1	hypothetical protein		Phyllobacterium sp. P30BS-XVII	Bacteria; Proteobacteria; Alphaproteobacteria; Hyphomicrobiales; Phyllobacteriaceae; Phyllobacterium; unclassified Phyllobacterium
NZ_JACGXO010000005.1	200	305474	306499	1	WP_162700311.1	FHW17_RS16170	GCF_014138335.1	DUF4150 domain-containing protein	DUF4150+VRR_NUC	Phyllobacterium sp. P30BS-XVII	Bacteria; Proteobacteria; Alphaproteobacteria; Hyphomicrobiales; Phyllobacteriaceae; Phyllobacterium; unclassified Phyllobacterium
NZ_JACGXO010000005.1	200	306477	307514	0	WP_182510322.1	FHW17_RS16175	GCF_014138335.1	DUF3396 domain-containing protein	DUF3396	Phyllobacterium sp. P30BS-XVII	Bacteria; Proteobacteria; Alphaproteobacteria; Hyphomicrobiales; Phyllobacteriaceae; Phyllobacterium; unclassified Phyllobacterium
NZ_JACGXO010000005.1	200	307803	309890	0	WP_182510323.1	FHW17_RS16185	GCF_014138335.1	prolyl oligopeptidase family serine peptidase	Peptidase_S9_N+Peptidase_S9	Phyllobacterium sp. P30BS-XVII	Bacteria; Proteobacteria; Alphaproteobacteria; Hyphomicrobiales; Phyllobacteriaceae; Phyllobacterium; unclassified Phyllobacterium
NZ_JACGXO010000005.1	200	310037	313207	0	WP_112524848.1	FHW17_RS16190	GCF_014138335.1	efflux RND transporter permease subunit	ACR_tran	Phyllobacterium sp. P30BS-XVII	Bacteria; Proteobacteria; Alphaproteobacteria; Hyphomicrobiales; Phyllobacteriaceae; Phyllobacterium; unclassified Phyllobacterium
NZ_JAAOHY010000009.1	201	23802	24512	0	WP_166330520.1	G7044_RS15545	GCF_011308835.1	hypothetical protein		Paracoccus xiamenensis	Bacteria; Proteobacteria; Alphaproteobacteria; Rhodobacterales; Rhodobacteraceae; Paracoccus
NZ_JAAOHY010000009.1	201	24572	25441	0	WP_166330522.1	G7044_RS15550	GCF_011308835.1	hypothetical protein		Paracoccus xiamenensis	Bacteria; Proteobacteria; Alphaproteobacteria; Rhodobacterales; Rhodobacteraceae; Paracoccus
NZ_JAAOHY010000009.1	201	25438	25701	0	WP_166330524.1	G7044_RS15555	GCF_011308835.1	hypothetical protein		Paracoccus xiamenensis	Bacteria; Proteobacteria; Alphaproteobacteria; Rhodobacterales; Rhodobacteraceae; Paracoccus
NZ_JAAOHY010000009.1	201	25698	26759	1	WP_166330526.1	G7044_RS15560	GCF_011308835.1	DUF4150 domain-containing protein	DUF4150	Paracoccus xiamenensis	Bacteria; Proteobacteria; Alphaproteobacteria; Rhodobacterales; Rhodobacteraceae; Paracoccus
NZ_JAAOHY010000009.1	201	26778	27770	0	WP_166330528.1	G7044_RS15565	GCF_011308835.1	DUF3396 domain-containing protein	DUF3396	Paracoccus xiamenensis	Bacteria; Proteobacteria; Alphaproteobacteria; Rhodobacterales; Rhodobacteraceae; Paracoccus
NZ_JAAOHY010000009.1	201	27774	28343	0	WP_166330530.1	G7044_RS15570	GCF_011308835.1	hypothetical protein		Paracoccus xiamenensis	Bacteria; Proteobacteria; Alphaproteobacteria; Rhodobacterales; Rhodobacteraceae; Paracoccus
NZ_JAAOHY010000009.1	201	28346	29368	0	WP_166330532.1	G7044_RS15575	GCF_011308835.1	DUF2169 domain-containing protein	DUF2169	Paracoccus xiamenensis	Bacteria; Proteobacteria; Alphaproteobacteria; Rhodobacterales; Rhodobacteraceae; Paracoccus
NZ_JAAOLX010000007.1	202	142818	143456	0	WP_166827494.1	HA050_RS14395	GCF_011601265.1	TnsA endonuclease N-terminal domain-containing protein	Tn7_Tnp_TnsA_N	Iodobacter sp. HSC-16F04	Bacteria; Proteobacteria; Betaproteobacteria; Neisseriales; Chromobacteriaceae; Iodobacter
NZ_JAAOLX010000007.1	202	144220	145104	0	WP_166827506.1	HA050_RS14400	GCF_011601265.1	hypothetical protein		Iodobacter sp. HSC-16F04	Bacteria; Proteobacteria; Betaproteobacteria; Neisseriales; Chromobacteriaceae; Iodobacter
NZ_JAAOLX010000007.1	202	145402	148284	0	WP_166827516.1	HA050_RS14405	GCF_011601265.1	type VI secretion system tip protein VgrG	Phage_GPD+Phage_base_V+T6SS_Vgr+DUF2345	Iodobacter sp. HSC-16F04	Bacteria; Proteobacteria; Betaproteobacteria; Neisseriales; Chromobacteriaceae; Iodobacter
NZ_JAAOLX010000007.1	202	148285	149571	1	WP_166827518.1	HA050_RS14410	GCF_011601265.1	hypothetical protein	VRR_NUC	Iodobacter sp. HSC-16F04	Bacteria; Proteobacteria; Betaproteobacteria; Neisseriales; Chromobacteriaceae; Iodobacter
NZ_JAAOLX010000007.1	202	148285	149571	1	WP_166827518.1	HA050_RS14410	GCF_011601265.1	hypothetical protein	VRR_NUC	Iodobacter sp. HSC-16F04	Bacteria; Proteobacteria; Betaproteobacteria; Neisseriales; Chromobacteriaceae; Iodobacter
NZ_JAAOLX010000007.1	202	149584	150765	0	WP_166827520.1	HA050_RS14415	GCF_011601265.1	DUF3396 domain-containing protein	DUF3396	Iodobacter sp. HSC-16F04	Bacteria; Proteobacteria; Betaproteobacteria; Neisseriales; Chromobacteriaceae; Iodobacter
NZ_JAAOLX010000007.1	202	151606	152880	0	WP_166827523.1	HA050_RS14420	GCF_011601265.1	serine/threonine protein kinase	Pkinase	Iodobacter sp. HSC-16F04	Bacteria; Proteobacteria; Betaproteobacteria; Neisseriales; Chromobacteriaceae; Iodobacter
NZ_JAAOLX010000007.1	202	153385	153927	0	WP_166827526.1	HA050_RS14425	GCF_011601265.1	dual specificity protein phosphatase family protein	DSPc	Iodobacter sp. HSC-16F04	Bacteria; Proteobacteria; Betaproteobacteria; Neisseriales; Chromobacteriaceae; Iodobacter
NZ_VWWN01000055.1	203	9103	9387	0	WP_166914017.1	F3J21_RS10895	GCF_011752985.1	hypothetical protein	SP+TM	Burkholderia sp. Tr-860	Bacteria; Proteobacteria; Betaproteobacteria; Burkholderiales; Burkholderiaceae; Burkholderia
NZ_VWWN01000055.1	203	9600	10115	0	WP_166914015.1	F3J21_RS10900	GCF_011752985.1	hypothetical protein	TM	Burkholderia sp. Tr-860	Bacteria; Proteobacteria; Betaproteobacteria; Burkholderiales; Burkholderiaceae; Burkholderia
NZ_VWWN01000055.1	203	10255	10794	0	WP_166914013.1	F3J21_RS10905	GCF_011752985.1	PAAR domain-containing protein	PAAR_motif	Burkholderia sp. Tr-860	Bacteria; Proteobacteria; Betaproteobacteria; Burkholderiales; Burkholderiaceae; Burkholderia
NZ_VWWN01000055.1	203	10791	11498	1	WP_166914011.1	F3J21_RS10910	GCF_011752985.1	VRR-NUC domain-containing protein	VRR_NUC	Burkholderia sp. Tr-860	Bacteria; Proteobacteria; Betaproteobacteria; Burkholderiales; Burkholderiaceae; Burkholderia
NZ_VWWN01000055.1	203	11517	12602	0	WP_166914009.1	F3J21_RS10915	GCF_011752985.1	DUF3396 domain-containing protein	DUF3396	Burkholderia sp. Tr-860	Bacteria; Proteobacteria; Betaproteobacteria; Burkholderiales; Burkholderiaceae; Burkholderia
NZ_VWWN01000055.1	203	12562	13005	0	WP_205195523.1	F3J21_RS10920	GCF_011752985.1	DUF2778 domain-containing protein	DUF2778	Burkholderia sp. Tr-860	Bacteria; Proteobacteria; Betaproteobacteria; Burkholderiales; Burkholderiaceae; Burkholderia
NZ_VWWN01000055.1	203	13002	13274	0	WP_166914005.1	F3J21_RS10925	GCF_011752985.1	hypothetical protein	SP+TM	Burkholderia sp. Tr-860	Bacteria; Proteobacteria; Betaproteobacteria; Burkholderiales; Burkholderiaceae; Burkholderia
NZ_VWWN01000061.1	204	15049	16707	0	WP_166913271.1	F3J21_RS11650	GCF_011752985.1	MHS family MFS transporter	Sugar_tr+Sugar_tr+Sugar_tr	Burkholderia sp. Tr-860	Bacteria; Proteobacteria; Betaproteobacteria; Burkholderiales; Burkholderiaceae; Burkholderia
NZ_VWWN01000061.1	204	17515	18591	0	WP_166913270.1	F3J21_RS11660	GCF_011752985.1	hypothetical protein	Imm71+Imm72	Burkholderia sp. Tr-860	Bacteria; Proteobacteria; Betaproteobacteria; Burkholderiales; Burkholderiaceae; Burkholderia
NZ_VWWN01000061.1	204	19059	19598	0	WP_166913269.1	F3J21_RS11670	GCF_011752985.1	PAAR domain-containing protein	PAAR_motif	Burkholderia sp. Tr-860	Bacteria; Proteobacteria; Betaproteobacteria; Burkholderiales; Burkholderiaceae; Burkholderia
NZ_VWWN01000061.1	204	19595	20329	1	WP_166913268.1	F3J21_RS11675	GCF_011752985.1	VRR-NUC domain-containing protein	VRR_NUC	Burkholderia sp. Tr-860	Bacteria; Proteobacteria; Betaproteobacteria; Burkholderiales; Burkholderiaceae; Burkholderia
NZ_VWWN01000061.1	204	20351	21445	0	WP_166913267.1	F3J21_RS11680	GCF_011752985.1	DUF3396 domain-containing protein	DUF3396	Burkholderia sp. Tr-860	Bacteria; Proteobacteria; Betaproteobacteria; Burkholderiales; Burkholderiaceae; Burkholderia
NZ_VWWN01000061.1	204	21491	22549	0	WP_025096942.1	F3J21_RS11685	GCF_011752985.1	conjugal transfer protein TraG	MCPsignal+dCache_1	Burkholderia sp. Tr-860	Bacteria; Proteobacteria; Betaproteobacteria; Burkholderiales; Burkholderiaceae; Burkholderia
NZ_VWWN01000061.1	204	22900	23862	0	WP_166913266.1	F3J21_RS11690	GCF_011752985.1	quinone oxidoreductase	ADH_N+ADH_zinc_N	Burkholderia sp. Tr-860	Bacteria; Proteobacteria; Betaproteobacteria; Burkholderiales; Burkholderiaceae; Burkholderia
NZ_VUYU01000034.1	205	8563	9945	0	WP_167231576.1	F0185_RS30125	GCF_011682065.1	hypothetical protein		Massilia rubra	Bacteria; Proteobacteria; Betaproteobacteria; Burkholderiales; Oxalobacteraceae; Massilia
NZ_VUYU01000034.1	205	9942	10244	0	WP_167231579.1	F0185_RS30130	GCF_011682065.1	hypothetical protein	DUF2345	Massilia rubra	Bacteria; Proteobacteria; Betaproteobacteria; Burkholderiales; Oxalobacteraceae; Massilia
NZ_VUYU01000034.1	205	10281	11369	0	WP_167231582.1	F0185_RS30135	GCF_011682065.1	DUF2169 domain-containing protein	DUF2169	Massilia rubra	Bacteria; Proteobacteria; Betaproteobacteria; Burkholderiales; Oxalobacteraceae; Massilia
NZ_VUYU01000034.1	205	11366	12463	1	WP_167231585.1	F0185_RS30140	GCF_011682065.1	DUF4150 domain-containing protein	DUF4150	Massilia rubra	Bacteria; Proteobacteria; Betaproteobacteria; Burkholderiales; Oxalobacteraceae; Massilia
NZ_VUYU01000034.1	205	12486	13418	0	WP_167231588.1	F0185_RS30145	GCF_011682065.1	DUF3396 domain-containing protein	DUF3396	Massilia rubra	Bacteria; Proteobacteria; Betaproteobacteria; Burkholderiales; Oxalobacteraceae; Massilia
NZ_VUYU01000034.1	205	13547	14479	0	WP_167231590.1	F0185_RS30150	GCF_011682065.1	DUF3396 domain-containing protein	DUF3396	Massilia rubra	Bacteria; Proteobacteria; Betaproteobacteria; Burkholderiales; Oxalobacteraceae; Massilia
NZ_VUYU01000034.1	205	14744	15280	0	WP_167231593.1	F0185_RS30155	GCF_011682065.1	hypothetical protein		Massilia rubra	Bacteria; Proteobacteria; Betaproteobacteria; Burkholderiales; Oxalobacteraceae; Massilia
NZ_VWWL01000049.1	206	1	580	1	WP_167050483.1	F3J19_RS32080	GCF_011752995.1	VRR-NUC domain-containing protein	VRR_NUC	Burkholderia sp. Ax-1724	Bacteria; Proteobacteria; Betaproteobacteria; Burkholderiales; Burkholderiaceae; Burkholderia
NZ_VWWL01000049.1	206	608	3331	0	WP_167050485.1	F3J19_RS32085	GCF_011752995.1	type VI secretion system tip protein VgrG	Phage_GPD+Phage_base_V+T6SS_Vgr+DUF2345	Burkholderia sp. Ax-1724	Bacteria; Proteobacteria; Betaproteobacteria; Burkholderiales; Burkholderiaceae; Burkholderia
NZ_VWWL01000049.1	206	4113	5687	0	WP_167050487.1	F3J19_RS32095	GCF_011752995.1	efflux transporter outer membrane subunit	SP+OEP+OEP	Burkholderia sp. Ax-1724	Bacteria; Proteobacteria; Betaproteobacteria; Burkholderiales; Burkholderiaceae; Burkholderia
NZ_VWWL01000049.1	206	5684	6658	0	WP_205193439.1	F3J19_RS32100	GCF_011752995.1	HlyD family secretion protein	SP+Biotin_lipoyl_2+HlyD_3	Burkholderia sp. Ax-1724	Bacteria; Proteobacteria; Betaproteobacteria; Burkholderiales; Burkholderiaceae; Burkholderia
NZ_JABAIJ010000008.1	207	288882	289118	0	WP_168813116.1	HGP17_RS24870	GCF_012641435.1	hypothetical protein		Rhizobium sp. P38BS-XIX	Bacteria; Proteobacteria; Alphaproteobacteria; Hyphomicrobiales; Rhizobiaceae; Rhizobium/Agrobacterium group; Rhizobium
NZ_JABAIJ010000008.1	207	289129	290157	0	WP_168813117.1	HGP17_RS24875	GCF_012641435.1	DUF2169 domain-containing protein	DUF2169	Rhizobium sp. P38BS-XIX	Bacteria; Proteobacteria; Alphaproteobacteria; Hyphomicrobiales; Rhizobiaceae; Rhizobium/Agrobacterium group; Rhizobium
NZ_JABAIJ010000008.1	207	290154	291263	0	WP_168813118.1	HGP17_RS24880	GCF_012641435.1	hypothetical protein	ketoacyl-synt	Rhizobium sp. P38BS-XIX	Bacteria; Proteobacteria; Alphaproteobacteria; Hyphomicrobiales; Rhizobiaceae; Rhizobium/Agrobacterium group; Rhizobium
NZ_JABAIJ010000008.1	207	291274	292344	1	WP_168813119.1	HGP17_RS24885	GCF_012641435.1	DUF4150 domain-containing protein	DUF4150	Rhizobium sp. P38BS-XIX	Bacteria; Proteobacteria; Alphaproteobacteria; Hyphomicrobiales; Rhizobiaceae; Rhizobium/Agrobacterium group; Rhizobium
NZ_JABAIJ010000008.1	207	292378	293394	0	WP_168813120.1	HGP17_RS24890	GCF_012641435.1	DUF3396 domain-containing protein	DUF3396	Rhizobium sp. P38BS-XIX	Bacteria; Proteobacteria; Alphaproteobacteria; Hyphomicrobiales; Rhizobiaceae; Rhizobium/Agrobacterium group; Rhizobium
NZ_JABAIJ010000008.1	207	293572	295560	0	WP_168813121.1	HGP17_RS24895	GCF_012641435.1	DUF4139 domain-containing protein	SP+DUF4139	Rhizobium sp. P38BS-XIX	Bacteria; Proteobacteria; Alphaproteobacteria; Hyphomicrobiales; Rhizobiaceae; Rhizobium/Agrobacterium group; Rhizobium
NZ_JABAIJ010000008.1	207	295737	296504	0	WP_168813122.1	HGP17_RS24900	GCF_012641435.1	autoinducer binding domain-containing protein	Autoind_bind+GerE	Rhizobium sp. P38BS-XIX	Bacteria; Proteobacteria; Alphaproteobacteria; Hyphomicrobiales; Rhizobiaceae; Rhizobium/Agrobacterium group; Rhizobium
NZ_LXUK01000005.1	208	185626	186411	0	WP_171551216.1	A7P55_RS04335	GCF_013072695.1	YdcF family protein	TM+TM+TM+DUF218	Acinetobacter sp. Ac_5812	Bacteria; Proteobacteria; Gammaproteobacteria; Pseudomonadales; Moraxellaceae; Acinetobacter
NZ_LXUK01000005.1	208	186530	189067	0	WP_171551217.1	A7P55_RS04340	GCF_013072695.1	PepSY domain-containing protein	PepSY_TM+Flavodoxin_1+NAD_binding_1	Acinetobacter sp. Ac_5812	Bacteria; Proteobacteria; Gammaproteobacteria; Pseudomonadales; Moraxellaceae; Acinetobacter
NZ_LXUK01000005.1	208	189308	189841	0	WP_171551218.1	A7P55_RS04345	GCF_013072695.1	PAAR domain-containing protein	PAAR_motif	Acinetobacter sp. Ac_5812	Bacteria; Proteobacteria; Gammaproteobacteria; Pseudomonadales; Moraxellaceae; Acinetobacter
NZ_LXUK01000005.1	208	189834	190562	1	WP_171551219.1	A7P55_RS04350	GCF_013072695.1	VRR-NUC domain-containing protein	VRR_NUC+TM	Acinetobacter sp. Ac_5812	Bacteria; Proteobacteria; Gammaproteobacteria; Pseudomonadales; Moraxellaceae; Acinetobacter
NZ_LXUK01000005.1	208	190576	191676	0	WP_171551220.1	A7P55_RS04355	GCF_013072695.1	DUF3396 domain-containing protein	DUF3396	Acinetobacter sp. Ac_5812	Bacteria; Proteobacteria; Gammaproteobacteria; Pseudomonadales; Moraxellaceae; Acinetobacter
NZ_LXUK01000005.1	208	191642	192784	0	WP_216077965.1	A7P55_RS04360	GCF_013072695.1	DUF3396 domain-containing protein	DUF3396	Acinetobacter sp. Ac_5812	Bacteria; Proteobacteria; Gammaproteobacteria; Pseudomonadales; Moraxellaceae; Acinetobacter
NZ_LXUK01000005.1	208	192896	193477	0	WP_016541443.1	A7P55_RS04365	GCF_013072695.1	YcxB family protein	TM+TM+YcxB	Acinetobacter sp. Ac_5812	Bacteria; Proteobacteria; Gammaproteobacteria; Pseudomonadales; Moraxellaceae; Acinetobacter
NZ_JWZY01000003.1	209	223658	224989	0	WP_171938901.1	RC52_RS04705	GCF_013180365.1	50S ribosome-binding GTPase	SP+GTP_EFTU+GTP_EFTU_D2	Herbaspirillum rubrisubalbicans	Bacteria; Proteobacteria; Betaproteobacteria; Burkholderiales; Oxalobacteraceae; Herbaspirillum
NZ_JWZY01000003.1	209	225027	225788	0	WP_171938902.1	RC52_RS04710	GCF_013180365.1	uroporphyrinogen-III C-methyltransferase	TP_methylase	Herbaspirillum rubrisubalbicans	Bacteria; Proteobacteria; Betaproteobacteria; Burkholderiales; Oxalobacteraceae; Herbaspirillum
NZ_JWZY01000003.1	209	226178	226750	0	WP_171938903.1	RC52_RS04715	GCF_013180365.1	PAAR domain-containing protein	PAAR_motif	Herbaspirillum rubrisubalbicans	Bacteria; Proteobacteria; Betaproteobacteria; Burkholderiales; Oxalobacteraceae; Herbaspirillum
NZ_JWZY01000003.1	209	226750	227757	1	WP_171938904.1	RC52_RS04720	GCF_013180365.1	hypothetical protein	VRR_NUC+TM+TM	Herbaspirillum rubrisubalbicans	Bacteria; Proteobacteria; Betaproteobacteria; Burkholderiales; Oxalobacteraceae; Herbaspirillum
NZ_JWZY01000003.1	209	226750	227757	1	WP_171938904.1	RC52_RS04720	GCF_013180365.1	hypothetical protein	VRR_NUC+TM+TM	Herbaspirillum rubrisubalbicans	Bacteria; Proteobacteria; Betaproteobacteria; Burkholderiales; Oxalobacteraceae; Herbaspirillum
NZ_JWZY01000003.1	209	227754	228953	0	WP_171938905.1	RC52_RS04725	GCF_013180365.1	DUF3396 domain-containing protein	DUF3396	Herbaspirillum rubrisubalbicans	Bacteria; Proteobacteria; Betaproteobacteria; Burkholderiales; Oxalobacteraceae; Herbaspirillum
NZ_JWZY01000003.1	209	228985	229371	0	WP_171427053.1	RC52_RS04730	GCF_013180365.1	CbiX/SirB N-terminal domain-containing protein	CbiX	Herbaspirillum rubrisubalbicans	Bacteria; Proteobacteria; Betaproteobacteria; Burkholderiales; Oxalobacteraceae; Herbaspirillum
NZ_JWZY01000003.1	209	229417	230547	0	WP_017451656.1	RC52_RS04735	GCF_013180365.1	LPS export ABC transporter permease LptG	LptF_LptG	Herbaspirillum rubrisubalbicans	Bacteria; Proteobacteria; Betaproteobacteria; Burkholderiales; Oxalobacteraceae; Herbaspirillum
NZ_FOBK01000003.1	210	207632	208123	0	WP_092766576.1	BMW42_RS04665	GCF_900109815.1	hypothetical protein		Acinetobacter sp. DSM 11652	Bacteria; Proteobacteria; Gammaproteobacteria; Moraxellales; Moraxellaceae; Acinetobacter
NZ_FOBK01000003.1	210	208157	208786	0	WP_092766577.1	BMW42_RS04670	GCF_900109815.1	hypothetical protein	Proteasome	Acinetobacter sp. DSM 11652	Bacteria; Proteobacteria; Gammaproteobacteria; Moraxellales; Moraxellaceae; Acinetobacter
NZ_FOBK01000003.1	210	208882	209283	0	WP_092766578.1	BMW42_RS04675	GCF_900109815.1	hypothetical protein	DUF2345	Acinetobacter sp. DSM 11652	Bacteria; Proteobacteria; Gammaproteobacteria; Moraxellales; Moraxellaceae; Acinetobacter
NZ_FOBK01000003.1	210	209276	210187	1	WP_171260677.1	BMW42_RS04680	GCF_900109815.1	VRR-NUC domain-containing protein	VRR_NUC+TM	Acinetobacter sp. DSM 11652	Bacteria; Proteobacteria; Gammaproteobacteria; Moraxellales; Moraxellaceae; Acinetobacter
NZ_FOBK01000003.1	210	209276	210187	1	WP_171260677.1	BMW42_RS04680	GCF_900109815.1	VRR-NUC domain-containing protein	VRR_NUC+TM	Acinetobacter sp. DSM 11652	Bacteria; Proteobacteria; Gammaproteobacteria; Moraxellales; Moraxellaceae; Acinetobacter
NZ_FOBK01000003.1	210	210200	211471	0	WP_092766580.1	BMW42_RS04685	GCF_900109815.1	DUF3396 domain-containing protein	DUF3396	Acinetobacter sp. DSM 11652	Bacteria; Proteobacteria; Gammaproteobacteria; Moraxellales; Moraxellaceae; Acinetobacter
NZ_FOBK01000003.1	210	211673	212137	0	WP_035264844.1	BMW42_RS04690	GCF_900109815.1	DUF523 domain-containing protein	2-thiour_desulf	Acinetobacter sp. DSM 11652	Bacteria; Proteobacteria; Gammaproteobacteria; Moraxellales; Moraxellaceae; Acinetobacter
NZ_FOBK01000003.1	210	212144	213109	0	WP_092766581.1	BMW42_RS04695	GCF_900109815.1	bile acid:sodium symporter family protein	TM+SBF+TM+TM+TM	Acinetobacter sp. DSM 11652	Bacteria; Proteobacteria; Gammaproteobacteria; Moraxellales; Moraxellaceae; Acinetobacter
NZ_QPES01000002.1	211	352678	353145	0	WP_153102019.1	GH657_RS15955	GCF_009455685.1	hypothetical protein	TM	Paraburkholderia hayleyella	Bacteria; Proteobacteria; Betaproteobacteria; Burkholderiales; Burkholderiaceae; Paraburkholderia
NZ_QPES01000002.1	211	353310	353504	0	WP_153102020.1	GH657_RS15960	GCF_009455685.1	CsbD family protein	CsbD	Paraburkholderia hayleyella	Bacteria; Proteobacteria; Betaproteobacteria; Burkholderiales; Burkholderiaceae; Paraburkholderia
NZ_QPES01000002.1	211	354751	357540	0	WP_153102021.1	GH657_RS15970	GCF_009455685.1	type VI secretion system tip protein VgrG	Phage_GPD+Phage_base_V+T6SS_Vgr+DUF2345	Paraburkholderia hayleyella	Bacteria; Proteobacteria; Betaproteobacteria; Burkholderiales; Burkholderiaceae; Paraburkholderia
NZ_QPES01000002.1	211	357567	358778	1	WP_174770003.1	GH657_RS15975	GCF_009455685.1	VRR-NUC domain-containing protein	VRR_NUC+TM+TM	Paraburkholderia hayleyella	Bacteria; Proteobacteria; Betaproteobacteria; Burkholderiales; Burkholderiaceae; Paraburkholderia
NZ_QPES01000002.1	211	357567	358778	1	WP_174770003.1	GH657_RS15975	GCF_009455685.1	VRR-NUC domain-containing protein	VRR_NUC+TM+TM	Paraburkholderia hayleyella	Bacteria; Proteobacteria; Betaproteobacteria; Burkholderiales; Burkholderiaceae; Paraburkholderia
NZ_QPES01000002.1	211	359150	359986	0	WP_220094866.1	GH657_RS15980	GCF_009455685.1	DUF3396 domain-containing protein	DUF3396+DUF3396	Paraburkholderia hayleyella	Bacteria; Proteobacteria; Betaproteobacteria; Burkholderiales; Burkholderiaceae; Paraburkholderia
NZ_QPES01000002.1	211	359997	360248	0	WP_153102023.1	GH657_RS15985	GCF_009455685.1	PAAR domain-containing protein	PAAR_motif	Paraburkholderia hayleyella	Bacteria; Proteobacteria; Betaproteobacteria; Burkholderiales; Burkholderiaceae; Paraburkholderia
NZ_QPES01000002.1	211	360824	362089	0	WP_153102024.1	GH657_RS15990	GCF_009455685.1	MFS transporter	MFS_3	Paraburkholderia hayleyella	Bacteria; Proteobacteria; Betaproteobacteria; Burkholderiales; Burkholderiaceae; Paraburkholderia
NZ_JABRVS010000001.1	212	592033	592551	0	WP_173292967.1	HQQ94_RS02695	GCF_013248905.1	Hcp family type VI secretion system effector	T6SS_HCP	Shewanella sp. VB17	Bacteria; Proteobacteria; Gammaproteobacteria; Alteromonadales; Shewanellaceae; Shewanella
NZ_JABRVS010000001.1	212	592808	594856	0	WP_173292968.1	HQQ94_RS02700	GCF_013248905.1	type VI secretion system tip protein VgrG	Phage_GPD+Phage_base_V	Shewanella sp. VB17	Bacteria; Proteobacteria; Gammaproteobacteria; Alteromonadales; Shewanellaceae; Shewanella
NZ_JABRVS010000001.1	212	595453	596544	0	WP_173292969.1	HQQ94_RS02710	GCF_013248905.1	DUF4123 domain-containing protein	DUF4123	Shewanella sp. VB17	Bacteria; Proteobacteria; Gammaproteobacteria; Alteromonadales; Shewanellaceae; Shewanella
NZ_JABRVS010000001.1	212	596544	597425	1	WP_173292970.1	HQQ94_RS02715	GCF_013248905.1	VRR-NUC domain-containing protein	VRR_NUC	Shewanella sp. VB17	Bacteria; Proteobacteria; Gammaproteobacteria; Alteromonadales; Shewanellaceae; Shewanella
NZ_JABRVS010000001.1	212	597596	598609	0	WP_173292971.1	HQQ94_RS02720	GCF_013248905.1	DUF3396 domain-containing protein	DUF3396	Shewanella sp. VB17	Bacteria; Proteobacteria; Gammaproteobacteria; Alteromonadales; Shewanellaceae; Shewanella
NZ_JABRVS010000001.1	212	598581	599666	0	WP_173292972.1	HQQ94_RS02725	GCF_013248905.1	DUF3396 domain-containing protein	DUF3396	Shewanella sp. VB17	Bacteria; Proteobacteria; Gammaproteobacteria; Alteromonadales; Shewanellaceae; Shewanella
NZ_JABRVS010000001.1	212	599716	600102	0	WP_173292973.1	HQQ94_RS02730	GCF_013248905.1	hypothetical protein		Shewanella sp. VB17	Bacteria; Proteobacteria; Gammaproteobacteria; Alteromonadales; Shewanellaceae; Shewanella
NZ_JAAMCM010000034.1	213	598	1581	0	WP_174156177.1	G6L88_RS22310	GCF_013320815.1	DUF3396 domain-containing protein	DUF3396	Rhizobium skierniewicense	Bacteria; Proteobacteria; Alphaproteobacteria; Hyphomicrobiales; Rhizobiaceae; Rhizobium/Agrobacterium group; Rhizobium
NZ_JAAMCM010000034.1	213	1594	2595	1	WP_174156178.1	G6L88_RS22315	GCF_013320815.1	DUF4150 domain-containing protein	DUF4150+VRR_NUC	Rhizobium skierniewicense	Bacteria; Proteobacteria; Alphaproteobacteria; Hyphomicrobiales; Rhizobiaceae; Rhizobium/Agrobacterium group; Rhizobium
NZ_JAAMCM010000034.1	213	2597	3643	0	WP_174156179.1	G6L88_RS22320	GCF_013320815.1	hypothetical protein		Rhizobium skierniewicense	Bacteria; Proteobacteria; Alphaproteobacteria; Hyphomicrobiales; Rhizobiaceae; Rhizobium/Agrobacterium group; Rhizobium
NZ_JAAMCM010000034.1	213	3640	4692	0	WP_210258471.1	G6L88_RS22325	GCF_013320815.1	DUF2169 domain-containing protein	DUF2169	Rhizobium skierniewicense	Bacteria; Proteobacteria; Alphaproteobacteria; Hyphomicrobiales; Rhizobiaceae; Rhizobium/Agrobacterium group; Rhizobium
NZ_JAAMCM010000034.1	213	4695	4949	0	WP_174156181.1	G6L88_RS22330	GCF_013320815.1	hypothetical protein		Rhizobium skierniewicense	Bacteria; Proteobacteria; Alphaproteobacteria; Hyphomicrobiales; Rhizobiaceae; Rhizobium/Agrobacterium group; Rhizobium
NZ_JAAMFA010000003.1	214	21779	22276	0	WP_174171765.1	G6M49_RS00195	GCF_013322165.1	hypothetical protein		Agrobacterium rhizogenes	Bacteria; Proteobacteria; Alphaproteobacteria; Hyphomicrobiales; Rhizobiaceae; Rhizobium/Agrobacterium group; Agrobacterium
NZ_JAAMFA010000003.1	214	22444	22797	0	WP_174171766.1	G6M49_RS00200	GCF_013322165.1	sulfurtransferase TusA family protein	TusA	Agrobacterium rhizogenes	Bacteria; Proteobacteria; Alphaproteobacteria; Hyphomicrobiales; Rhizobiaceae; Rhizobium/Agrobacterium group; Agrobacterium
NZ_JAAMFA010000003.1	214	22844	23842	0	WP_174171767.1	G6M49_RS00205	GCF_013322165.1	DUF3396 domain-containing protein	DUF3396	Agrobacterium rhizogenes	Bacteria; Proteobacteria; Alphaproteobacteria; Hyphomicrobiales; Rhizobiaceae; Rhizobium/Agrobacterium group; Agrobacterium
NZ_JAAMFA010000003.1	214	23855	25414	1	WP_174171768.1	G6M49_RS00210	GCF_013322165.1	DUF4150 domain-containing protein	DUF4150	Agrobacterium rhizogenes	Bacteria; Proteobacteria; Alphaproteobacteria; Hyphomicrobiales; Rhizobiaceae; Rhizobium/Agrobacterium group; Agrobacterium
NZ_JAAMFA010000003.1	214	25411	26523	0	WP_174171769.1	G6M49_RS00215	GCF_013322165.1	DUF2169 domain-containing protein	DUF2169	Agrobacterium rhizogenes	Bacteria; Proteobacteria; Alphaproteobacteria; Hyphomicrobiales; Rhizobiaceae; Rhizobium/Agrobacterium group; Agrobacterium
NZ_JAAMFA010000003.1	214	26538	28802	0	WP_174171770.1	G6M49_RS00220	GCF_013322165.1	type VI secretion system tip protein VgrG	Phage_GPD+Phage_base_V	Agrobacterium rhizogenes	Bacteria; Proteobacteria; Alphaproteobacteria; Hyphomicrobiales; Rhizobiaceae; Rhizobium/Agrobacterium group; Agrobacterium
NZ_JAAMFA010000003.1	214	28809	29357	0	WP_174171771.1	G6M49_RS00225	GCF_013322165.1	hypothetical protein		Agrobacterium rhizogenes	Bacteria; Proteobacteria; Alphaproteobacteria; Hyphomicrobiales; Rhizobiaceae; Rhizobium/Agrobacterium group; Agrobacterium
NZ_SUQM01000090.1	215	1	879	0	WP_174428561.1	FCJ59_RS35560	GCF_013337645.1	DUF2345 domain-containing protein	DUF2345	Cupriavidus basilensis	Bacteria; Proteobacteria; Betaproteobacteria; Burkholderiales; Burkholderiaceae; Cupriavidus
NZ_SUQM01000090.1	215	895	2115	1	WP_174428562.1	FCJ59_RS35565	GCF_013337645.1	VRR-NUC domain-containing protein	VRR_NUC+TM+TM	Cupriavidus basilensis	Bacteria; Proteobacteria; Betaproteobacteria; Burkholderiales; Burkholderiaceae; Cupriavidus
NZ_SUQM01000090.1	215	2136	3581	0	WP_174428563.1	FCJ59_RS35570	GCF_013337645.1	DUF3396 domain-containing protein	DUF3396	Cupriavidus basilensis	Bacteria; Proteobacteria; Betaproteobacteria; Burkholderiales; Burkholderiaceae; Cupriavidus
NZ_SUQM01000090.1	215	3750	6380	0	WP_174428564.1	FCJ59_RS35575	GCF_013337645.1	type VI secretion system tip protein VgrG	Phage_GPD+Phage_base_V+T6SS_Vgr+DUF2345	Cupriavidus basilensis	Bacteria; Proteobacteria; Betaproteobacteria; Burkholderiales; Burkholderiaceae; Cupriavidus
NZ_SUQM01000090.1	215	6377	7249	0	WP_174428565.1	FCJ59_RS35580	GCF_013337645.1	hypothetical protein		Cupriavidus basilensis	Bacteria; Proteobacteria; Betaproteobacteria; Burkholderiales; Burkholderiaceae; Cupriavidus
NZ_CADESX010000003.1	216	146678	147928	0	WP_175717395.1	HWW00_RS07290	GCF_902830145.1	type VI secretion system protein TssL, long form	DotU+OmpA	Burkholderia anthina	Bacteria; Proteobacteria; Betaproteobacteria; Burkholderiales; Burkholderiaceae; Burkholderia; Burkholderia cepacia complex
NZ_CADESX010000003.1	216	148142	148393	0	WP_175717396.1	HWW00_RS07295	GCF_902830145.1	PAAR domain-containing protein	PAAR_motif	Burkholderia anthina	Bacteria; Proteobacteria; Betaproteobacteria; Burkholderiales; Burkholderiaceae; Burkholderia; Burkholderia cepacia complex
NZ_CADESX010000003.1	216	148462	149724	0	WP_175717397.1	HWW00_RS07300	GCF_902830145.1	DUF3396 domain-containing protein	DUF3396	Burkholderia anthina	Bacteria; Proteobacteria; Betaproteobacteria; Burkholderiales; Burkholderiaceae; Burkholderia; Burkholderia cepacia complex
NZ_CADESX010000003.1	216	149748	150617	1	WP_175717398.1	HWW00_RS07305	GCF_902830145.1	VRR-NUC domain-containing protein	VRR_NUC	Burkholderia anthina	Bacteria; Proteobacteria; Betaproteobacteria; Burkholderiales; Burkholderiaceae; Burkholderia; Burkholderia cepacia complex
NZ_CADESX010000003.1	216	150654	153365	0	WP_175717399.1	HWW00_RS07310	GCF_902830145.1	type VI secretion system tip protein VgrG	Phage_GPD+Phage_base_V+T6SS_Vgr+DUF2345	Burkholderia anthina	Bacteria; Proteobacteria; Betaproteobacteria; Burkholderiales; Burkholderiaceae; Burkholderia; Burkholderia cepacia complex
NZ_CADESX010000003.1	216	154162	155472	0	WP_175717400.1	HWW00_RS07315	GCF_902830145.1	MFS transporter	MFS_1+TM	Burkholderia anthina	Bacteria; Proteobacteria; Betaproteobacteria; Burkholderiales; Burkholderiaceae; Burkholderia; Burkholderia cepacia complex
NZ_CADESX010000003.1	216	155663	156745	0	WP_175717401.1	HWW00_RS07320	GCF_902830145.1	tartrate dehydrogenase	Iso_dh	Burkholderia anthina	Bacteria; Proteobacteria; Betaproteobacteria; Burkholderiales; Burkholderiaceae; Burkholderia; Burkholderia cepacia complex
NZ_CADFDC010000018.1	217	51993	52220	0	WP_175914458.1	HWX11_RS32725	GCF_902832815.1	CopG family transcriptional regulator	VapB_antitoxin	Burkholderia metallica	Bacteria; Proteobacteria; Betaproteobacteria; Burkholderiales; Burkholderiaceae; Burkholderia; Burkholderia cepacia complex
NZ_CADFDC010000018.1	217	52217	52651	0	WP_208458561.1	HWX11_RS32730	GCF_902832815.1	PIN domain-containing protein	PIN	Burkholderia metallica	Bacteria; Proteobacteria; Betaproteobacteria; Burkholderiales; Burkholderiaceae; Burkholderia; Burkholderia cepacia complex
NZ_CADFDC010000018.1	217	52806	53000	0	WP_175914460.1	HWX11_RS32735	GCF_902832815.1	hypothetical protein		Burkholderia metallica	Bacteria; Proteobacteria; Betaproteobacteria; Burkholderiales; Burkholderiaceae; Burkholderia; Burkholderia cepacia complex
NZ_CADFDC010000018.1	217	53651	54097	1	WP_175914461.1	HWX11_RS32745	GCF_902832815.1	hypothetical protein		Burkholderia metallica	Bacteria; Proteobacteria; Betaproteobacteria; Burkholderiales; Burkholderiaceae; Burkholderia; Burkholderia cepacia complex
NZ_CADFDC010000018.1	217	55525	56073	0	WP_175914462.1	HWX11_RS32755	GCF_902832815.1	hypothetical protein		Burkholderia metallica	Bacteria; Proteobacteria; Betaproteobacteria; Burkholderiales; Burkholderiaceae; Burkholderia; Burkholderia cepacia complex
NZ_CADFDC010000018.1	217	57098	57799	0	WP_175914525.1	HWX11_RS32770	GCF_902832815.1	translesion DNA synthesis-associated protein ImuA	RecA	Burkholderia metallica	Bacteria; Proteobacteria; Betaproteobacteria; Burkholderiales; Burkholderiaceae; Burkholderia; Burkholderia cepacia complex
NZ_CADFDC010000018.1	217	58026	58361	0	WP_175914526.1	HWX11_RS32775	GCF_902832815.1	metalloregulator ArsR/SmtB family transcription factor	HTH_20	Burkholderia metallica	Bacteria; Proteobacteria; Betaproteobacteria; Burkholderiales; Burkholderiaceae; Burkholderia; Burkholderia cepacia complex
NZ_CADFDS010000030.1	218	36298	36642	0	WP_175948247.1	HWX33_RS34330	GCF_902832935.1	hypothetical protein		Burkholderia pyrrocinia	Bacteria; Proteobacteria; Betaproteobacteria; Burkholderiales; Burkholderiaceae; Burkholderia; Burkholderia cepacia complex
NZ_CADFDS010000030.1	218	36884	37135	0	WP_174378983.1	HWX33_RS34335	GCF_902832935.1	PAAR domain-containing protein	PAAR_motif	Burkholderia pyrrocinia	Bacteria; Proteobacteria; Betaproteobacteria; Burkholderiales; Burkholderiaceae; Burkholderia; Burkholderia cepacia complex
NZ_CADFDS010000030.1	218	37147	39855	0	WP_175948248.1	HWX33_RS34340	GCF_902832935.1	type VI secretion system tip protein VgrG	SP+Phage_GPD+Phage_base_V+T6SS_Vgr+DUF2345	Burkholderia pyrrocinia	Bacteria; Proteobacteria; Betaproteobacteria; Burkholderiales; Burkholderiaceae; Burkholderia; Burkholderia cepacia complex
NZ_CADFDS010000030.1	218	39865	40773	1	WP_175948249.1	HWX33_RS34345	GCF_902832935.1	VRR-NUC domain-containing protein	VRR_NUC+TM	Burkholderia pyrrocinia	Bacteria; Proteobacteria; Betaproteobacteria; Burkholderiales; Burkholderiaceae; Burkholderia; Burkholderia cepacia complex
NZ_CADFDS010000030.1	218	40802	42067	0	WP_175948250.1	HWX33_RS34350	GCF_902832935.1	DUF3396 domain-containing protein	DUF3396	Burkholderia pyrrocinia	Bacteria; Proteobacteria; Betaproteobacteria; Burkholderiales; Burkholderiaceae; Burkholderia; Burkholderia cepacia complex
NZ_CADFDS010000030.1	218	42148	42351	0	WP_175948251.1	HWX33_RS34355	GCF_902832935.1	DNA methyltransferase		Burkholderia pyrrocinia	Bacteria; Proteobacteria; Betaproteobacteria; Burkholderiales; Burkholderiaceae; Burkholderia; Burkholderia cepacia complex
NZ_CADFDS010000030.1	218	42923	43609	0	WP_175948265.1	HWX33_RS34360	GCF_902832935.1	ATP-binding protein	AlbA_2	Burkholderia pyrrocinia	Bacteria; Proteobacteria; Betaproteobacteria; Burkholderiales; Burkholderiaceae; Burkholderia; Burkholderia cepacia complex
NZ_JACBNX010000005.1	219	98791	98970	0	WP_179401924.1	HZI36_RS07090	GCF_013403875.1	type II toxin-antitoxin system PemK/MazF family toxin	PemK_toxin	Burkholderia guangdongensis	Bacteria; Proteobacteria; Betaproteobacteria; Burkholderiales; Burkholderiaceae; Burkholderia
NZ_JACBNX010000005.1	219	98990	99226	0	WP_179402006.1	HZI36_RS07095	GCF_013403875.1	type II toxin-antitoxin system VapB family antitoxin	MazE_antitoxin	Burkholderia guangdongensis	Bacteria; Proteobacteria; Betaproteobacteria; Burkholderiales; Burkholderiaceae; Burkholderia
NZ_JACBNX010000005.1	219	99254	100372	0	WP_179401925.1	HZI36_RS07100	GCF_013403875.1	DUF3396 domain-containing protein	DUF3396	Burkholderia guangdongensis	Bacteria; Proteobacteria; Betaproteobacteria; Burkholderiales; Burkholderiaceae; Burkholderia
NZ_JACBNX010000005.1	219	100378	100824	1	WP_179401926.1	HZI36_RS07105	GCF_013403875.1	nuclease	VRR_NUC	Burkholderia guangdongensis	Bacteria; Proteobacteria; Betaproteobacteria; Burkholderiales; Burkholderiaceae; Burkholderia
NZ_JACBNX010000005.1	219	100840	102129	0	WP_179401927.1	HZI36_RS07110	GCF_013403875.1	glycosyltransferase family 4 protein	Glyco_trans_4_4+Glycos_transf_1	Burkholderia guangdongensis	Bacteria; Proteobacteria; Betaproteobacteria; Burkholderiales; Burkholderiaceae; Burkholderia
NZ_JACBNX010000005.1	219	102255	109106	0	WP_179401928.1	HZI36_RS07115	GCF_013403875.1	DUF4214 domain-containing protein	DUF4214+DUF4214+HemolysinCabind+HemolysinCabind	Burkholderia guangdongensis	Bacteria; Proteobacteria; Betaproteobacteria; Burkholderiales; Burkholderiaceae; Burkholderia
NZ_JACBNX010000005.1	219	109582	110181	0	WP_179401929.1	HZI36_RS07120	GCF_013403875.1	Crp/Fnr family transcriptional regulator	cNMP_binding+HTH_Crp_2	Burkholderia guangdongensis	Bacteria; Proteobacteria; Betaproteobacteria; Burkholderiales; Burkholderiaceae; Burkholderia
NZ_JACCAU010000001.1	220	471495	471671	0	WP_167444502.1	GGD41_RS02140	GCF_013408935.1	hypothetical protein	TM	Paraburkholderia bryophila	Bacteria; Proteobacteria; Betaproteobacteria; Burkholderiales; Burkholderiaceae; Paraburkholderia
NZ_JACCAU010000001.1	220	472004	472162	0	WP_035547187.1	GGD41_RS02145	GCF_013408935.1	DUF3309 family protein	DUF3309	Paraburkholderia bryophila	Bacteria; Proteobacteria; Betaproteobacteria; Burkholderiales; Burkholderiaceae; Paraburkholderia
NZ_JACCAU010000001.1	220	473370	474482	0	WP_179703572.1	GGD41_RS02155	GCF_013408935.1	type I restriction enzyme HsdR N-terminal domain-containing protein	HSDR_N_2	Paraburkholderia bryophila	Bacteria; Proteobacteria; Betaproteobacteria; Burkholderiales; Burkholderiaceae; Paraburkholderia
NZ_JACCAU010000001.1	220	475905	476702	1	WP_179708543.1	GGD41_RS02165	GCF_013408935.1	VRR-NUC domain-containing protein	VRR_NUC	Paraburkholderia bryophila	Bacteria; Proteobacteria; Betaproteobacteria; Burkholderiales; Burkholderiaceae; Paraburkholderia
NZ_JACCAU010000001.1	220	476735	477238	0	WP_218904938.1	GGD41_RS02170	GCF_013408935.1	PAAR domain-containing protein	PAAR_motif	Paraburkholderia bryophila	Bacteria; Proteobacteria; Betaproteobacteria; Burkholderiales; Burkholderiaceae; Paraburkholderia
NZ_JACCAU010000001.1	220	478261	478719	0	WP_179703570.1	GGD41_RS02175	GCF_013408935.1	phosphohistidine phosphatase SixA	His_Phos_1	Paraburkholderia bryophila	Bacteria; Proteobacteria; Betaproteobacteria; Burkholderiales; Burkholderiaceae; Paraburkholderia
NZ_JACCAU010000001.1	220	479042	479854	0	WP_179744517.1	GGD41_RS02180	GCF_013408935.1	GNAT family N-acetyltransferase	Acetyltransf_5	Paraburkholderia bryophila	Bacteria; Proteobacteria; Betaproteobacteria; Burkholderiales; Burkholderiaceae; Paraburkholderia
NZ_CADFGI010000003.1	221	54275	54433	0	WP_035547187.1	HWY05_RS11960	GCF_902833695.1	DUF3309 family protein	DUF3309	Paraburkholderia sp. BCC1876	Bacteria; Proteobacteria; Betaproteobacteria; Burkholderiales; Burkholderiaceae; Paraburkholderia
NZ_CADFGI010000003.1	221	55739	56851	0	WP_176058503.1	HWY05_RS11970	GCF_902833695.1	type I restriction enzyme HsdR N-terminal domain-containing protein	HSDR_N_2	Paraburkholderia sp. BCC1876	Bacteria; Proteobacteria; Betaproteobacteria; Burkholderiales; Burkholderiaceae; Paraburkholderia
NZ_CADFGI010000003.1	221	57180	58268	0	WP_176058504.1	HWY05_RS11975	GCF_902833695.1	DUF3396 domain-containing protein	DUF3396	Paraburkholderia sp. BCC1876	Bacteria; Proteobacteria; Betaproteobacteria; Burkholderiales; Burkholderiaceae; Paraburkholderia
NZ_CADFGI010000003.1	221	58275	59105	1	WP_176058505.1	HWY05_RS11980	GCF_902833695.1	VRR-NUC domain-containing protein	VRR_NUC	Paraburkholderia sp. BCC1876	Bacteria; Proteobacteria; Betaproteobacteria; Burkholderiales; Burkholderiaceae; Paraburkholderia
NZ_CADFGI010000003.1	221	59102	59608	0	WP_176058853.1	HWY05_RS11985	GCF_902833695.1	PAAR domain-containing protein	PAAR_motif	Paraburkholderia sp. BCC1876	Bacteria; Proteobacteria; Betaproteobacteria; Burkholderiales; Burkholderiaceae; Paraburkholderia
NZ_CADFGI010000003.1	221	60289	60519	0	WP_081935682.1	HWY05_RS11990	GCF_902833695.1	type I toxin-antitoxin system SymE family toxin	SymE_toxin	Paraburkholderia sp. BCC1876	Bacteria; Proteobacteria; Betaproteobacteria; Burkholderiales; Burkholderiaceae; Paraburkholderia
NZ_CADFGI010000003.1	221	60840	61298	0	WP_176058506.1	HWY05_RS11995	GCF_902833695.1	phosphohistidine phosphatase SixA	His_Phos_1	Paraburkholderia sp. BCC1876	Bacteria; Proteobacteria; Betaproteobacteria; Burkholderiales; Burkholderiaceae; Paraburkholderia
NZ_QJRR01000004.1	222	39385	40374	0	WP_110600334.1	DMX04_RS08640	GCF_003205315.1	hypothetical protein	TM+TM+TM	Pseudomonas koreensis	Bacteria; Proteobacteria; Gammaproteobacteria; Pseudomonadales; Pseudomonadaceae; Pseudomonas
NZ_QJRR01000004.1	222	40442	40639	0	WP_146225328.1	DMX04_RS28155	GCF_003205315.1	hypothetical protein		Pseudomonas koreensis	Bacteria; Proteobacteria; Gammaproteobacteria; Pseudomonadales; Pseudomonadaceae; Pseudomonas
NZ_QJRR01000004.1	222	40786	41865	0	WP_110600336.1	DMX04_RS08645	GCF_003205315.1	DUF3396 domain-containing protein	DUF3396	Pseudomonas koreensis	Bacteria; Proteobacteria; Gammaproteobacteria; Pseudomonadales; Pseudomonadaceae; Pseudomonas
NZ_QJRR01000004.1	222	41858	43027	1	WP_181424939.1	DMX04_RS08650	GCF_003205315.1	VRR-NUC domain-containing protein	VRR_NUC	Pseudomonas koreensis	Bacteria; Proteobacteria; Gammaproteobacteria; Pseudomonadales; Pseudomonadaceae; Pseudomonas
NZ_QJRR01000004.1	222	41858	43027	1	WP_181424939.1	DMX04_RS08650	GCF_003205315.1	VRR-NUC domain-containing protein	VRR_NUC	Pseudomonas koreensis	Bacteria; Proteobacteria; Gammaproteobacteria; Pseudomonadales; Pseudomonadaceae; Pseudomonas
NZ_QJRR01000004.1	222	45574	45831	0	WP_110600339.1	DMX04_RS08660	GCF_003205315.1	PAAR domain-containing protein	PAAR_motif+PAAR_motif	Pseudomonas koreensis	Bacteria; Proteobacteria; Gammaproteobacteria; Pseudomonadales; Pseudomonadaceae; Pseudomonas
NZ_QJRR01000004.1	222	45909	46430	0	WP_110600341.1	DMX04_RS08665	GCF_003205315.1	Hcp family type VI secretion system effector	T6SS_HCP	Pseudomonas koreensis	Bacteria; Proteobacteria; Gammaproteobacteria; Pseudomonadales; Pseudomonadaceae; Pseudomonas
NZ_QJRR01000004.1	222	47368	48714	0	WP_110600345.1	DMX04_RS08675	GCF_003205315.1	type VI secretion system baseplate subunit TssK	T6SS_VasE	Pseudomonas koreensis	Bacteria; Proteobacteria; Gammaproteobacteria; Pseudomonadales; Pseudomonadaceae; Pseudomonas
NZ_QJTK01000001.1	223	123873	124097	0	WP_110803791.1	C8J30_RS18820	GCF_003217355.1	hypothetical protein		Rhodobacter viridis	Bacteria; Proteobacteria; Alphaproteobacteria; Rhodobacterales; Rhodobacteraceae; Rhodobacter
NZ_QJTK01000001.1	223	124104	124643	0	WP_110803792.1	C8J30_RS00570	GCF_003217355.1	hypothetical protein		Rhodobacter viridis	Bacteria; Proteobacteria; Alphaproteobacteria; Rhodobacterales; Rhodobacteraceae; Rhodobacter
NZ_QJTK01000001.1	223	124659	125027	0	WP_110803793.1	C8J30_RS00575	GCF_003217355.1	hypothetical protein		Rhodobacter viridis	Bacteria; Proteobacteria; Alphaproteobacteria; Rhodobacterales; Rhodobacteraceae; Rhodobacter
NZ_QJTK01000001.1	223	125150	126169	1	WP_181420722.1	C8J30_RS00580	GCF_003217355.1	DUF4150 domain-containing protein	DUF4150	Rhodobacter viridis	Bacteria; Proteobacteria; Alphaproteobacteria; Rhodobacterales; Rhodobacteraceae; Rhodobacter
NZ_QJTK01000001.1	223	126189	127793	0	WP_110803795.1	C8J30_RS00585	GCF_003217355.1	DUF3396 domain-containing protein	DUF3396	Rhodobacter viridis	Bacteria; Proteobacteria; Alphaproteobacteria; Rhodobacterales; Rhodobacteraceae; Rhodobacter
NZ_QJTK01000001.1	223	127781	128359	0	WP_110803796.1	C8J30_RS00590	GCF_003217355.1	DUF2169 domain-containing protein	DUF2169	Rhodobacter viridis	Bacteria; Proteobacteria; Alphaproteobacteria; Rhodobacterales; Rhodobacteraceae; Rhodobacter
NZ_QJTK01000001.1	223	128356	128808	0	WP_181420759.1	C8J30_RS00595	GCF_003217355.1	DUF2169 domain-containing protein	DUF2169	Rhodobacter viridis	Bacteria; Proteobacteria; Alphaproteobacteria; Rhodobacterales; Rhodobacteraceae; Rhodobacter
NZ_VPDH01000127.1	224	250	447	0	WP_180058951.1	FTV09_RS16990	GCF_013417785.1	hypothetical protein		Acinetobacter sp. YH12227	Bacteria; Proteobacteria; Gammaproteobacteria; Pseudomonadales; Moraxellaceae; Acinetobacter
NZ_VPDH01000127.1	224	462	1139	1	WP_180058952.1	FTV09_RS16995	GCF_013417785.1	hypothetical protein		Acinetobacter sp. YH12227	Bacteria; Proteobacteria; Gammaproteobacteria; Pseudomonadales; Moraxellaceae; Acinetobacter
NZ_VPDH01000127.1	224	462	1139	1	WP_180058952.1	FTV09_RS16995	GCF_013417785.1	hypothetical protein		Acinetobacter sp. YH12227	Bacteria; Proteobacteria; Gammaproteobacteria; Pseudomonadales; Moraxellaceae; Acinetobacter
NZ_VPDH01000127.1	224	1133	1504	0	WP_180058953.1	FTV09_RS17000	GCF_013417785.1	hypothetical protein		Acinetobacter sp. YH12227	Bacteria; Proteobacteria; Gammaproteobacteria; Pseudomonadales; Moraxellaceae; Acinetobacter
NZ_VPDH01000127.1	224	1801	2067	0	WP_111860974.1	FTV09_RS17005	GCF_013417785.1	hypothetical protein		Acinetobacter sp. YH12227	Bacteria; Proteobacteria; Gammaproteobacteria; Pseudomonadales; Moraxellaceae; Acinetobacter
NZ_VPDH01000127.1	224	2102	2425	0	WP_111860973.1	FTV09_RS17010	GCF_013417785.1	hypothetical protein		Acinetobacter sp. YH12227	Bacteria; Proteobacteria; Gammaproteobacteria; Pseudomonadales; Moraxellaceae; Acinetobacter
NZ_VPCV01000086.1	225	3575	4129	0	WP_180047798.1	FTU97_RS18885	GCF_013418025.1	hypothetical protein	TM+Cys_rich_CPCC	Acinetobacter sp. YH12210	Bacteria; Proteobacteria; Gammaproteobacteria; Pseudomonadales; Moraxellaceae; Acinetobacter
NZ_VPCV01000086.1	225	4835	6493	0	WP_180047800.1	FTU97_RS18895	GCF_013418025.1	RHS domain-containing protein	RHS_repeat+RHS_repeat+RHS_repeat+RHS	Acinetobacter sp. YH12210	Bacteria; Proteobacteria; Gammaproteobacteria; Pseudomonadales; Moraxellaceae; Acinetobacter
NZ_VPCV01000086.1	225	6647	7945	0	WP_180047802.1	FTU97_RS18905	GCF_013418025.1	DUF3396 domain-containing protein	DUF3396+DUF3396	Acinetobacter sp. YH12210	Bacteria; Proteobacteria; Gammaproteobacteria; Pseudomonadales; Moraxellaceae; Acinetobacter
NZ_VPCV01000086.1	225	7962	9110	1	WP_180047804.1	FTU97_RS18910	GCF_013418025.1	VRR-NUC domain-containing protein	VRR_NUC+TM	Acinetobacter sp. YH12210	Bacteria; Proteobacteria; Gammaproteobacteria; Pseudomonadales; Moraxellaceae; Acinetobacter
NZ_VPCV01000086.1	225	7962	9110	1	WP_180047804.1	FTU97_RS18910	GCF_013418025.1	VRR-NUC domain-containing protein	VRR_NUC+TM	Acinetobacter sp. YH12210	Bacteria; Proteobacteria; Gammaproteobacteria; Pseudomonadales; Moraxellaceae; Acinetobacter
NZ_JACHWC010000005.1	226	160398	161084	0	WP_221224593.1	FHX57_RS11275	GCF_014191085.1	nitroreductase family protein	Nitroreductase	Paraburkholderia tropica	Bacteria; Proteobacteria; Betaproteobacteria; Burkholderiales; Burkholderiaceae; Paraburkholderia
NZ_JACHWC010000005.1	226	162131	162517	0	WP_183714482.1	FHX57_RS11285	GCF_014191085.1	hypothetical protein		Paraburkholderia tropica	Bacteria; Proteobacteria; Betaproteobacteria; Burkholderiales; Burkholderiaceae; Paraburkholderia
NZ_JACHWC010000005.1	226	163045	165372	0	WP_183714485.1	FHX57_RS11290	GCF_014191085.1	type VI secretion system tip protein VgrG	Phage_GPD+Phage_base_V	Paraburkholderia tropica	Bacteria; Proteobacteria; Betaproteobacteria; Burkholderiales; Burkholderiaceae; Paraburkholderia
NZ_JACHWC010000005.1	226	165376	166434	1	WP_183714488.1	FHX57_RS11295	GCF_014191085.1	VRR-NUC domain-containing protein	VRR_NUC+TM	Paraburkholderia tropica	Bacteria; Proteobacteria; Betaproteobacteria; Burkholderiales; Burkholderiaceae; Paraburkholderia
NZ_JACHWC010000005.1	226	166725	167921	0	WP_176080989.1	FHX57_RS11300	GCF_014191085.1	DUF3396 domain-containing protein	TM+DUF3396	Paraburkholderia tropica	Bacteria; Proteobacteria; Betaproteobacteria; Burkholderiales; Burkholderiaceae; Paraburkholderia
NZ_JACHWC010000005.1	226	169181	169357	0	WP_181441035.1	FHX57_RS11310	GCF_014191085.1	hypothetical protein		Paraburkholderia tropica	Bacteria; Proteobacteria; Betaproteobacteria; Burkholderiales; Burkholderiaceae; Paraburkholderia
NZ_JACHWC010000005.1	226	169398	171416	0	WP_065061390.1	FHX57_RS11315	GCF_014191085.1	cation acetate symporter	TM+TM+SSF+DUF2818+SSF+TM	Paraburkholderia tropica	Bacteria; Proteobacteria; Betaproteobacteria; Burkholderiales; Burkholderiaceae; Paraburkholderia
NZ_CAIZEQ010000029.1	227	2540	2884	0	WP_135410986.1	H1X94_RS22025	GCF_903932005.1	hypothetical protein		Escherichia coli	Bacteria; Proteobacteria; Gammaproteobacteria; Enterobacterales; Enterobacteriaceae; Escherichia
NZ_CAIZEQ010000029.1	227	2917	3654	0	WP_180558256.1	H1X94_RS22030	GCF_903932005.1	hypothetical protein	Tox-REase-5	Escherichia coli	Bacteria; Proteobacteria; Gammaproteobacteria; Enterobacterales; Enterobacteriaceae; Escherichia
NZ_CAIZEQ010000029.1	227	3651	4370	0	WP_180558253.1	H1X94_RS22035	GCF_903932005.1	immunity 52 family protein	Imm52	Escherichia coli	Bacteria; Proteobacteria; Gammaproteobacteria; Enterobacterales; Enterobacteriaceae; Escherichia
NZ_CAIZEQ010000029.1	227	6486	7853	1	WP_180558254.1	H1X94_RS22045	GCF_903932005.1	hypothetical protein		Escherichia coli	Bacteria; Proteobacteria; Gammaproteobacteria; Enterobacterales; Enterobacteriaceae; Escherichia
NZ_CAIZEQ010000029.1	227	7854	9080	0	WP_180558255.1	H1X94_RS22050	GCF_903932005.1	DUF3396 domain-containing protein	DUF3396	Escherichia coli	Bacteria; Proteobacteria; Gammaproteobacteria; Enterobacterales; Enterobacteriaceae; Escherichia
NZ_CADFAR010000006.1	228	97363	98148	0	WP_186197566.1	H9F64_RS12450	GCF_902832235.1	hypothetical protein		Burkholderia gladioli	Bacteria; Proteobacteria; Betaproteobacteria; Burkholderiales; Burkholderiaceae; Burkholderia
NZ_CADFAR010000006.1	228	98444	99016	0	WP_186197567.1	H9F64_RS12455	GCF_902832235.1	hypothetical protein	SP	Burkholderia gladioli	Bacteria; Proteobacteria; Betaproteobacteria; Burkholderiales; Burkholderiaceae; Burkholderia
NZ_CADFAR010000006.1	228	99166	99714	0	WP_186197568.1	H9F64_RS12460	GCF_902832235.1	PAAR domain-containing protein	PAAR_motif	Burkholderia gladioli	Bacteria; Proteobacteria; Betaproteobacteria; Burkholderiales; Burkholderiaceae; Burkholderia
NZ_CADFAR010000006.1	228	99711	100466	1	WP_186197569.1	H9F64_RS12465	GCF_902832235.1	VRR-NUC domain-containing protein	VRR_NUC	Burkholderia gladioli	Bacteria; Proteobacteria; Betaproteobacteria; Burkholderiales; Burkholderiaceae; Burkholderia
NZ_CADFAR010000006.1	228	100492	101712	0	WP_186197570.1	H9F64_RS12470	GCF_902832235.1	DUF3396 domain-containing protein	DUF3396	Burkholderia gladioli	Bacteria; Proteobacteria; Betaproteobacteria; Burkholderiales; Burkholderiaceae; Burkholderia
NZ_CADFAR010000006.1	228	101799	102782	0	WP_186197571.1	H9F64_RS12475	GCF_902832235.1	hypothetical protein	SP+SH3BP5	Burkholderia gladioli	Bacteria; Proteobacteria; Betaproteobacteria; Burkholderiales; Burkholderiaceae; Burkholderia
NZ_CADFAR010000006.1	228	103081	103998	0	WP_186197572.1	H9F64_RS12480	GCF_902832235.1	type II toxin-antitoxin system RelB/DinJ family antitoxin	RelB	Burkholderia gladioli	Bacteria; Proteobacteria; Betaproteobacteria; Burkholderiales; Burkholderiaceae; Burkholderia
NZ_CP050301.1	229	1357987	1358238	0	WP_188345244.1	HB779_RS08240	GCF_014189505.1	hypothetical protein		Phyllobacterium sp. 628	Bacteria; Proteobacteria; Alphaproteobacteria; Hyphomicrobiales; Phyllobacteriaceae; Phyllobacterium; unclassified Phyllobacterium
NZ_CP050301.1	229	1358250	1359272	0	WP_188345245.1	HB779_RS08245	GCF_014189505.1	DUF2169 domain-containing protein	DUF2169	Phyllobacterium sp. 628	Bacteria; Proteobacteria; Alphaproteobacteria; Hyphomicrobiales; Phyllobacteriaceae; Phyllobacterium; unclassified Phyllobacterium
NZ_CP050301.1	229	1359272	1360309	0	WP_188345246.1	HB779_RS08250	GCF_014189505.1	hypothetical protein		Phyllobacterium sp. 628	Bacteria; Proteobacteria; Alphaproteobacteria; Hyphomicrobiales; Phyllobacteriaceae; Phyllobacterium; unclassified Phyllobacterium
NZ_CP050301.1	229	1360306	1361343	1	WP_188345247.1	HB779_RS08255	GCF_014189505.1	DUF4150 domain-containing protein	DUF4150+VRR_NUC	Phyllobacterium sp. 628	Bacteria; Proteobacteria; Alphaproteobacteria; Hyphomicrobiales; Phyllobacteriaceae; Phyllobacterium; unclassified Phyllobacterium
NZ_CP050301.1	229	1361363	1362376	0	WP_188345248.1	HB779_RS08260	GCF_014189505.1	DUF3396 domain-containing protein	DUF3396	Phyllobacterium sp. 628	Bacteria; Proteobacteria; Alphaproteobacteria; Hyphomicrobiales; Phyllobacteriaceae; Phyllobacterium; unclassified Phyllobacterium
NZ_CP050301.1	229	1363210	1364499	0	WP_188345249.1	HB779_RS08270	GCF_014189505.1	UDP-N-acetylglucosamine 1-carboxyvinyltransferase	EPSP_synthase	Phyllobacterium sp. 628	Bacteria; Proteobacteria; Alphaproteobacteria; Hyphomicrobiales; Phyllobacteriaceae; Phyllobacterium; unclassified Phyllobacterium
NZ_CP050301.1	229	1364619	1365056	0	WP_188345250.1	HB779_RS08275	GCF_014189505.1	DUF2948 family protein	DUF2948	Phyllobacterium sp. 628	Bacteria; Proteobacteria; Alphaproteobacteria; Hyphomicrobiales; Phyllobacteriaceae; Phyllobacterium; unclassified Phyllobacterium
NZ_NKHP01000021.1	230	38715	41966	0	WP_222941831.1	Xind_RS15060	GCF_014467235.1	inverse autotransporter beta domain-containing protein	SP+IAT_beta+Big_1+Big_1+Big_1+Big_1+Big_1	Xenorhabdus indica	Bacteria; Proteobacteria; Gammaproteobacteria; Enterobacterales; Morganellaceae; Xenorhabdus
NZ_NKHP01000021.1	230	42068	42337	0	WP_187650394.1	Xind_RS15065	GCF_014467235.1	PAAR domain-containing protein	PAAR_motif	Xenorhabdus indica	Bacteria; Proteobacteria; Gammaproteobacteria; Enterobacterales; Morganellaceae; Xenorhabdus
NZ_NKHP01000021.1	230	42321	43511	0	WP_187650395.1	Xind_RS15070	GCF_014467235.1	DUF3396 domain-containing protein	DUF3396	Xenorhabdus indica	Bacteria; Proteobacteria; Gammaproteobacteria; Enterobacterales; Morganellaceae; Xenorhabdus
NZ_NKHP01000021.1	230	43526	45046	1	WP_187650396.1	Xind_RS15075	GCF_014467235.1	VRR-NUC domain-containing protein	VRR_NUC+TM+TM	Xenorhabdus indica	Bacteria; Proteobacteria; Gammaproteobacteria; Enterobacterales; Morganellaceae; Xenorhabdus
NZ_NKHP01000021.1	230	45043	47220	0	WP_187650397.1	Xind_RS15080	GCF_014467235.1	type VI secretion system tip protein VgrG	Phage_GPD+Phage_base_V+Gp5_C	Xenorhabdus indica	Bacteria; Proteobacteria; Gammaproteobacteria; Enterobacterales; Morganellaceae; Xenorhabdus
NZ_NKHP01000021.1	230	47239	48975	0	WP_187650398.1	Xind_RS15085	GCF_014467235.1	type VI secretion system baseplate subunit TssF	T6SS_TssF	Xenorhabdus indica	Bacteria; Proteobacteria; Gammaproteobacteria; Enterobacterales; Morganellaceae; Xenorhabdus
NZ_NKHP01000021.1	230	49397	49795	0	WP_187650399.1	Xind_RS15090	GCF_014467235.1	TIGR03757 family integrating conjugative element protein	SP+DUF1525	Xenorhabdus indica	Bacteria; Proteobacteria; Gammaproteobacteria; Enterobacterales; Morganellaceae; Xenorhabdus
NZ_LPMI01000080.1	231	109683	110330	0	WP_059903432.1	WM23_RS16130	GCF_001533945.1	hypothetical protein		Burkholderia ubonensis	Bacteria; Proteobacteria; Betaproteobacteria; Burkholderiales; Burkholderiaceae; Burkholderia; Burkholderia cepacia complex
NZ_LPMI01000080.1	231	110500	111168	0	WP_059903429.1	WM23_RS36690	GCF_001533945.1	hypothetical protein	SP	Burkholderia ubonensis	Bacteria; Proteobacteria; Betaproteobacteria; Burkholderiales; Burkholderiaceae; Burkholderia; Burkholderia cepacia complex
NZ_LPMI01000080.1	231	111420	112538	0	WP_060294951.1	WM23_RS16135	GCF_001533945.1	DUF3396 domain-containing protein	DUF3396	Burkholderia ubonensis	Bacteria; Proteobacteria; Betaproteobacteria; Burkholderiales; Burkholderiaceae; Burkholderia; Burkholderia cepacia complex
NZ_LPMI01000080.1	231	112550	112996	1	WP_198346093.1	WM23_RS34730	GCF_001533945.1	VRR-NUC domain-containing protein	VRR_NUC	Burkholderia ubonensis	Bacteria; Proteobacteria; Betaproteobacteria; Burkholderiales; Burkholderiaceae; Burkholderia; Burkholderia cepacia complex
NZ_LPMI01000080.1	231	112550	112996	1	WP_198346093.1	WM23_RS34730	GCF_001533945.1	VRR-NUC domain-containing protein	VRR_NUC	Burkholderia ubonensis	Bacteria; Proteobacteria; Betaproteobacteria; Burkholderiales; Burkholderiaceae; Burkholderia; Burkholderia cepacia complex
NZ_RRYV01000057.1	232	44	1642	0	WP_192519570.1	EI164_RS08615	GCF_014861395.1	DUF2345 domain-containing protein	Phage_base_V+T6SS_Vgr+DUF2345	Psychrobacter sp. FME13	Bacteria; Proteobacteria; Gammaproteobacteria; Pseudomonadales; Moraxellaceae; Psychrobacter
NZ_RRYV01000057.1	232	1639	2535	1	WP_192519571.1	EI164_RS08620	GCF_014861395.1	VRR-NUC domain-containing protein	VRR_NUC+TM	Psychrobacter sp. FME13	Bacteria; Proteobacteria; Gammaproteobacteria; Pseudomonadales; Moraxellaceae; Psychrobacter
NZ_RRYV01000057.1	232	1639	2535	1	WP_192519571.1	EI164_RS08620	GCF_014861395.1	VRR-NUC domain-containing protein	VRR_NUC+TM	Psychrobacter sp. FME13	Bacteria; Proteobacteria; Gammaproteobacteria; Pseudomonadales; Moraxellaceae; Psychrobacter
NZ_RRYV01000057.1	232	2553	3824	0	WP_192519572.1	EI164_RS08625	GCF_014861395.1	DUF3396 domain-containing protein	DUF3396	Psychrobacter sp. FME13	Bacteria; Proteobacteria; Gammaproteobacteria; Pseudomonadales; Moraxellaceae; Psychrobacter
NZ_RRYV01000057.1	232	4024	4476	0	WP_192519573.1	EI164_RS08630	GCF_014861395.1	NERD domain-containing protein	NERD+TM	Psychrobacter sp. FME13	Bacteria; Proteobacteria; Gammaproteobacteria; Pseudomonadales; Moraxellaceae; Psychrobacter
NZ_RRYV01000057.1	232	4494	5936	0	WP_192519574.1	EI164_RS08635	GCF_014861395.1	hypothetical protein		Psychrobacter sp. FME13	Bacteria; Proteobacteria; Gammaproteobacteria; Pseudomonadales; Moraxellaceae; Psychrobacter
NZ_VTDR01000067.1	233	2051	3355	0	WP_195774081.1	I2F30_RS13100	GCF_015627235.1	DUF3396 domain-containing protein	DUF3396	Acinetobacter pollinis	Bacteria; Proteobacteria; Gammaproteobacteria; Moraxellales; Moraxellaceae; Acinetobacter
NZ_VTDR01000067.1	233	3368	4291	1	WP_195774082.1	I2F30_RS13105	GCF_015627235.1	nuclease	VRR_NUC	Acinetobacter pollinis	Bacteria; Proteobacteria; Gammaproteobacteria; Moraxellales; Moraxellaceae; Acinetobacter
NZ_VTDR01000067.1	233	3368	4291	1	WP_195774082.1	I2F30_RS13105	GCF_015627235.1	nuclease	VRR_NUC	Acinetobacter pollinis	Bacteria; Proteobacteria; Gammaproteobacteria; Moraxellales; Moraxellaceae; Acinetobacter
NZ_VTDR01000067.1	233	4294	4770	0	WP_228285416.1	I2F30_RS13110	GCF_015627235.1	PAAR domain-containing protein	PAAR_motif	Acinetobacter pollinis	Bacteria; Proteobacteria; Gammaproteobacteria; Moraxellales; Moraxellaceae; Acinetobacter
NZ_CP059488.1	234	978627	978854	0	WP_198661057.1	H2515_RS05070	GCF_016250455.1	hypothetical protein	Methylase_S	Acidithiobacillus ferrivorans	Bacteria; Proteobacteria; Acidithiobacillia; Acidithiobacillales; Acidithiobacillaceae; Acidithiobacillus
NZ_CP059488.1	234	979355	979756	0	WP_198661058.1	H2515_RS05075	GCF_016250455.1	transposase	DDE_5	Acidithiobacillus ferrivorans	Bacteria; Proteobacteria; Acidithiobacillia; Acidithiobacillales; Acidithiobacillaceae; Acidithiobacillus
NZ_CP059488.1	234	980243	981121	0	WP_198661059.1	H2515_RS05080	GCF_016250455.1	DUF4123 domain-containing protein	DUF4123	Acidithiobacillus ferrivorans	Bacteria; Proteobacteria; Acidithiobacillia; Acidithiobacillales; Acidithiobacillaceae; Acidithiobacillus
NZ_CP059488.1	234	981118	981978	1	WP_198661060.1	H2515_RS05085	GCF_016250455.1	VRR-NUC domain-containing protein	VRR_NUC	Acidithiobacillus ferrivorans	Bacteria; Proteobacteria; Acidithiobacillia; Acidithiobacillales; Acidithiobacillaceae; Acidithiobacillus
NZ_CP059488.1	234	981118	981978	1	WP_198661060.1	H2515_RS05085	GCF_016250455.1	VRR-NUC domain-containing protein	VRR_NUC	Acidithiobacillus ferrivorans	Bacteria; Proteobacteria; Acidithiobacillia; Acidithiobacillales; Acidithiobacillaceae; Acidithiobacillus
NZ_CP059488.1	234	981989	983047	0	WP_198661061.1	H2515_RS05090	GCF_016250455.1	DUF3396 domain-containing protein	DUF3396+DUF3396	Acidithiobacillus ferrivorans	Bacteria; Proteobacteria; Acidithiobacillia; Acidithiobacillales; Acidithiobacillaceae; Acidithiobacillus
NZ_CP059488.1	234	983214	983855	0	WP_198661062.1	H2515_RS05095	GCF_016250455.1	hypothetical protein		Acidithiobacillus ferrivorans	Bacteria; Proteobacteria; Acidithiobacillia; Acidithiobacillales; Acidithiobacillaceae; Acidithiobacillus
NZ_CP059488.1	234	985602	986360	0	WP_065414463.1	H2515_RS05105	GCF_016250455.1	IS21-like element helper ATPase IstB	IstB_IS21	Acidithiobacillus ferrivorans	Bacteria; Proteobacteria; Acidithiobacillia; Acidithiobacillales; Acidithiobacillaceae; Acidithiobacillus
NZ_JAEIJI010000030.1	235	113	367	0	WP_198726940.1	YA0002_RS12155	GCF_016308345.1	hypothetical protein		Pseudomonas cichorii	Bacteria; Proteobacteria; Gammaproteobacteria; Pseudomonadales; Pseudomonadaceae; Pseudomonas
NZ_JAEIJI010000030.1	235	371	1660	1	WP_198726879.1	YA0002_RS12160	GCF_016308345.1	VRR-NUC domain-containing protein	VRR_NUC+TM+TM	Pseudomonas cichorii	Bacteria; Proteobacteria; Gammaproteobacteria; Pseudomonadales; Pseudomonadaceae; Pseudomonas
NZ_JAEIJI010000030.1	235	1672	2796	0	WP_198726881.1	YA0002_RS12165	GCF_016308345.1	DUF3396 domain-containing protein	DUF3396	Pseudomonas cichorii	Bacteria; Proteobacteria; Gammaproteobacteria; Pseudomonadales; Pseudomonadaceae; Pseudomonas
NZ_JAEIJI010000030.1	235	2828	3952	0	WP_198726883.1	YA0002_RS12170	GCF_016308345.1	DUF3396 domain-containing protein	DUF3396	Pseudomonas cichorii	Bacteria; Proteobacteria; Gammaproteobacteria; Pseudomonadales; Pseudomonadaceae; Pseudomonas
NZ_JAEIJI010000030.1	235	4020	5270	0	WP_198726884.1	YA0002_RS12175	GCF_016308345.1	DUF1835 domain-containing protein	DUF1835	Pseudomonas cichorii	Bacteria; Proteobacteria; Gammaproteobacteria; Pseudomonadales; Pseudomonadaceae; Pseudomonas
NZ_JAEHFP010000084.1	236	7442	7693	0	WP_199260700.1	I9P22_RS17080	GCF_016446475.1	hypothetical protein		Paracoccus binzhouensis	Bacteria; Proteobacteria; Alphaproteobacteria; Rhodobacterales; Rhodobacteraceae; Paracoccus
NZ_JAEHFP010000084.1	236	7703	8728	0	WP_199260701.1	I9P22_RS17085	GCF_016446475.1	DUF2169 domain-containing protein	DUF2169	Paracoccus binzhouensis	Bacteria; Proteobacteria; Alphaproteobacteria; Rhodobacterales; Rhodobacteraceae; Paracoccus
NZ_JAEHFP010000084.1	236	8725	9735	0	WP_199260702.1	I9P22_RS17090	GCF_016446475.1	hypothetical protein	SP	Paracoccus binzhouensis	Bacteria; Proteobacteria; Alphaproteobacteria; Rhodobacterales; Rhodobacteraceae; Paracoccus
NZ_JAEHFP010000084.1	236	9732	10700	1	WP_199260703.1	I9P22_RS17095	GCF_016446475.1	DUF4150 domain-containing protein	DUF4150+VRR_NUC+TM	Paracoccus binzhouensis	Bacteria; Proteobacteria; Alphaproteobacteria; Rhodobacterales; Rhodobacteraceae; Paracoccus
NZ_JAEHFP010000084.1	236	10712	11698	0	WP_199260704.1	I9P22_RS17100	GCF_016446475.1	DUF3396 domain-containing protein	DUF3396	Paracoccus binzhouensis	Bacteria; Proteobacteria; Alphaproteobacteria; Rhodobacterales; Rhodobacteraceae; Paracoccus
NZ_JAEHFP010000084.1	236	11761	12456	0	WP_199260705.1	I9P22_RS17105	GCF_016446475.1	gamma-glutamylcyclotransferase	ChaC	Paracoccus binzhouensis	Bacteria; Proteobacteria; Alphaproteobacteria; Rhodobacterales; Rhodobacteraceae; Paracoccus
NZ_JAEHFP010000084.1	236	12501	12659	0	WP_199260706.1	I9P22_RS17110	GCF_016446475.1	hypothetical protein	SP	Paracoccus binzhouensis	Bacteria; Proteobacteria; Alphaproteobacteria; Rhodobacterales; Rhodobacteraceae; Paracoccus
NZ_JADCKR010000004.1	237	21463	22440	0	WP_199540751.1	IMY57_RS08475	GCF_016462025.1	type II secretion system F family protein	TM+TM+TM+T2SSF+TM	Paraburkholderia kururiensis subsp. kururiensis	Bacteria; Proteobacteria; Betaproteobacteria; Burkholderiales; Burkholderiaceae; Paraburkholderia
NZ_JADCKR010000004.1	237	22488	23453	0	WP_126879109.1	IMY57_RS08480	GCF_016462025.1	type II secretion system F family protein	TM+TM+TM+T2SSF	Paraburkholderia kururiensis subsp. kururiensis	Bacteria; Proteobacteria; Betaproteobacteria; Burkholderiales; Burkholderiaceae; Paraburkholderia
NZ_JADCKR010000004.1	237	23924	24913	0	WP_199540752.1	IMY57_RS08485	GCF_016462025.1	DUF3396 domain-containing protein	DUF3396	Paraburkholderia kururiensis subsp. kururiensis	Bacteria; Proteobacteria; Betaproteobacteria; Burkholderiales; Burkholderiaceae; Paraburkholderia
NZ_JADCKR010000004.1	237	24956	25999	1	WP_199540753.1	IMY57_RS08490	GCF_016462025.1	DUF4150 domain-containing protein	DUF4150	Paraburkholderia kururiensis subsp. kururiensis	Bacteria; Proteobacteria; Betaproteobacteria; Burkholderiales; Burkholderiaceae; Paraburkholderia
NZ_JADCKR010000004.1	237	25996	27090	0	WP_199540754.1	IMY57_RS08495	GCF_016462025.1	beta-ketoacyl synthase	SP	Paraburkholderia kururiensis subsp. kururiensis	Bacteria; Proteobacteria; Betaproteobacteria; Burkholderiales; Burkholderiaceae; Paraburkholderia
NZ_JADCKR010000004.1	237	27087	28157	0	WP_199540755.1	IMY57_RS08500	GCF_016462025.1	DUF2169 domain-containing protein	DUF2169	Paraburkholderia kururiensis subsp. kururiensis	Bacteria; Proteobacteria; Betaproteobacteria; Burkholderiales; Burkholderiaceae; Paraburkholderia
NZ_JADCKR010000004.1	237	28161	28424	0	WP_199540756.1	IMY57_RS08505	GCF_016462025.1	hypothetical protein		Paraburkholderia kururiensis subsp. kururiensis	Bacteria; Proteobacteria; Betaproteobacteria; Burkholderiales; Burkholderiaceae; Paraburkholderia
NZ_JACWCV010000516.1	238	390	2609	0	WP_200601593.1	HPY25_RS19510	GCF_016613375.1	type VI secretion system tip protein VgrG	Phage_GPD+Phage_base_V	Methylobacterium ajmalii	Bacteria; Proteobacteria; Alphaproteobacteria; Hyphomicrobiales; Methylobacteriaceae; Methylobacterium
NZ_JACWCV010000516.1	238	2626	3717	0	WP_175540064.1	HPY25_RS19515	GCF_016613375.1	DUF2169 domain-containing protein	DUF2169	Methylobacterium ajmalii	Bacteria; Proteobacteria; Alphaproteobacteria; Hyphomicrobiales; Methylobacteriaceae; Methylobacterium
NZ_JACWCV010000516.1	238	3714	4241	0	WP_091890279.1	HPY25_RS19520	GCF_016613375.1	DUF4150 domain-containing protein	DUF4150	Methylobacterium ajmalii	Bacteria; Proteobacteria; Alphaproteobacteria; Hyphomicrobiales; Methylobacteriaceae; Methylobacterium
NZ_JACWCV010000516.1	238	4254	5132	1	WP_200601592.1	HPY25_RS19525	GCF_016613375.1	hypothetical protein		Methylobacterium ajmalii	Bacteria; Proteobacteria; Alphaproteobacteria; Hyphomicrobiales; Methylobacteriaceae; Methylobacterium
NZ_JACWCV010000516.1	238	5095	6132	0	WP_091890358.1	HPY25_RS19530	GCF_016613375.1	DUF3396 domain-containing protein	DUF3396	Methylobacterium ajmalii	Bacteria; Proteobacteria; Alphaproteobacteria; Hyphomicrobiales; Methylobacteriaceae; Methylobacterium
NZ_JACWCV010000516.1	238	6237	6644	0	WP_200646930.1	HPY25_RS19535	GCF_016613375.1	DUF4150 domain-containing protein	DUF4150	Methylobacterium ajmalii	Bacteria; Proteobacteria; Alphaproteobacteria; Hyphomicrobiales; Methylobacteriaceae; Methylobacterium
NZ_JACWCV010000516.1	238	6862	7482	0	WP_200646931.1	HPY25_RS19540	GCF_016613375.1	hypothetical protein		Methylobacterium ajmalii	Bacteria; Proteobacteria; Alphaproteobacteria; Hyphomicrobiales; Methylobacteriaceae; Methylobacterium
NZ_JAESJE010000088.1	239	3655	8025	0	WP_202227347.1	JMM65_RS10140	GCF_016757145.1	hypothetical protein		Rhodovulum sulfidophilum	Bacteria; Proteobacteria; Alphaproteobacteria; Rhodobacterales; Rhodobacteraceae; Rhodovulum
NZ_JAESJE010000088.1	239	8556	10718	0	WP_202227348.1	JMM65_RS10145	GCF_016757145.1	type VI secretion system tip protein VgrG	Phage_GPD+Phage_base_V	Rhodovulum sulfidophilum	Bacteria; Proteobacteria; Alphaproteobacteria; Rhodobacterales; Rhodobacteraceae; Rhodovulum
NZ_JAESJE010000088.1	239	10732	11187	0	WP_201151994.1	JMM65_RS10150	GCF_016757145.1	DUF4150 domain-containing protein	DUF4150	Rhodovulum sulfidophilum	Bacteria; Proteobacteria; Alphaproteobacteria; Rhodobacterales; Rhodobacteraceae; Rhodovulum
NZ_JAESJE010000088.1	239	11222	12187	1	WP_202227349.1	JMM65_RS10155	GCF_016757145.1	hypothetical protein	SP	Rhodovulum sulfidophilum	Bacteria; Proteobacteria; Alphaproteobacteria; Rhodobacterales; Rhodobacteraceae; Rhodovulum
NZ_JAESJE010000088.1	239	12198	13178	0	WP_202227350.1	JMM65_RS10160	GCF_016757145.1	DUF3396 domain-containing protein	DUF3396	Rhodovulum sulfidophilum	Bacteria; Proteobacteria; Alphaproteobacteria; Rhodobacterales; Rhodobacteraceae; Rhodovulum
NZ_JAESJE010000088.1	239	13178	14230	0	WP_202227351.1	JMM65_RS10165	GCF_016757145.1	DUF2169 domain-containing protein	DUF2169	Rhodovulum sulfidophilum	Bacteria; Proteobacteria; Alphaproteobacteria; Rhodobacterales; Rhodobacteraceae; Rhodovulum
NZ_JAESJE010000150.1	240	3211	4224	0	WP_202227865.1	JMM65_RS13970	GCF_016757145.1	DUF2169 domain-containing protein	DUF2169	Rhodovulum sulfidophilum	Bacteria; Proteobacteria; Alphaproteobacteria; Rhodobacterales; Rhodobacteraceae; Rhodovulum
NZ_JAESJE010000150.1	240	4221	4790	0	WP_202227866.1	JMM65_RS13975	GCF_016757145.1	hypothetical protein		Rhodovulum sulfidophilum	Bacteria; Proteobacteria; Alphaproteobacteria; Rhodobacterales; Rhodobacteraceae; Rhodovulum
NZ_JAESJE010000150.1	240	4793	5761	0	WP_202227867.1	JMM65_RS13980	GCF_016757145.1	DUF3396 domain-containing protein	DUF3396	Rhodovulum sulfidophilum	Bacteria; Proteobacteria; Alphaproteobacteria; Rhodobacterales; Rhodobacteraceae; Rhodovulum
NZ_JAESJE010000150.1	240	5769	6809	1	WP_202227868.1	JMM65_RS13985	GCF_016757145.1	DUF4150 domain-containing protein	DUF4150+VRR_NUC	Rhodovulum sulfidophilum	Bacteria; Proteobacteria; Alphaproteobacteria; Rhodobacterales; Rhodobacteraceae; Rhodovulum
NZ_JAESJE010000150.1	240	6809	7060	0	WP_162107065.1	JMM65_RS13990	GCF_016757145.1	hypothetical protein		Rhodovulum sulfidophilum	Bacteria; Proteobacteria; Alphaproteobacteria; Rhodobacterales; Rhodobacteraceae; Rhodovulum
NZ_JAESJE010000150.1	240	7076	8302	0	WP_202227869.1	JMM65_RS13995	GCF_016757145.1	hypothetical protein	SP	Rhodovulum sulfidophilum	Bacteria; Proteobacteria; Alphaproteobacteria; Rhodobacterales; Rhodobacteraceae; Rhodovulum
NZ_JAESJE010000150.1	240	8324	9499	0	WP_162107063.1	JMM65_RS14000	GCF_016757145.1	hypothetical protein		Rhodovulum sulfidophilum	Bacteria; Proteobacteria; Alphaproteobacteria; Rhodobacterales; Rhodobacteraceae; Rhodovulum
NZ_CAJHCS010000010.1	241	246466	246921	0	WP_201651030.1	JMY25_RS18805	GCF_904848645.1	hypothetical protein		Paraburkholderia sabiae	Bacteria; Proteobacteria; Betaproteobacteria; Burkholderiales; Burkholderiaceae; Paraburkholderia
NZ_CAJHCS010000010.1	241	247016	248035	0	WP_201651031.1	JMY25_RS18810	GCF_904848645.1	integrase domain-containing protein	Phage_int_SAM_2+Integrase_1	Paraburkholderia sabiae	Bacteria; Proteobacteria; Betaproteobacteria; Burkholderiales; Burkholderiaceae; Paraburkholderia
NZ_CAJHCS010000010.1	241	249647	252415	0	WP_201651032.1	JMY25_RS18815	GCF_904848645.1	type VI secretion system tip protein VgrG	Phage_GPD+Phage_base_V+T6SS_Vgr+DUF2345	Paraburkholderia sabiae	Bacteria; Proteobacteria; Betaproteobacteria; Burkholderiales; Burkholderiaceae; Paraburkholderia
NZ_CAJHCS010000010.1	241	252437	253687	1	WP_201651033.1	JMY25_RS18820	GCF_904848645.1	VRR-NUC domain-containing protein	VRR_NUC+TM+TM	Paraburkholderia sabiae	Bacteria; Proteobacteria; Betaproteobacteria; Burkholderiales; Burkholderiaceae; Paraburkholderia
NZ_CAJHCS010000010.1	241	253739	255073	0	WP_201651034.1	JMY25_RS18825	GCF_904848645.1	DUF3396 domain-containing protein	DUF3396+DUF3396	Paraburkholderia sabiae	Bacteria; Proteobacteria; Betaproteobacteria; Burkholderiales; Burkholderiaceae; Paraburkholderia
NZ_CAJHCS010000010.1	241	255172	255849	0	WP_201651035.1	JMY25_RS18830	GCF_904848645.1	hypothetical protein	Imm71+Imm72	Paraburkholderia sabiae	Bacteria; Proteobacteria; Betaproteobacteria; Burkholderiales; Burkholderiaceae; Paraburkholderia
NZ_CP069338.1	242	7794056	7794268	0	WP_203403528.1	JQX13_RS33445	GCF_016859125.1	hypothetical protein		Archangium violaceum	Bacteria; Proteobacteria; Deltaproteobacteria; Myxococcales; Cystobacterineae; Archangiaceae; Archangium
NZ_CP069338.1	242	7794413	7797433	0	WP_203403529.1	JQX13_RS33450	GCF_016859125.1	PAS domain S-box protein	PAS_4+GAF_2+PAS+PAS_3+HisKA+HATPase_c	Archangium violaceum	Bacteria; Proteobacteria; Deltaproteobacteria; Myxococcales; Cystobacterineae; Archangiaceae; Archangium
NZ_CP069338.1	242	7797598	7798575	0	WP_203403530.1	JQX13_RS33455	GCF_016859125.1	DUF3396 domain-containing protein	DUF3396	Archangium violaceum	Bacteria; Proteobacteria; Deltaproteobacteria; Myxococcales; Cystobacterineae; Archangiaceae; Archangium
NZ_CP069338.1	242	7798615	7799520	1	WP_203403531.1	JQX13_RS33460	GCF_016859125.1	VRR-NUC domain-containing protein	SP+VRR_NUC	Archangium violaceum	Bacteria; Proteobacteria; Deltaproteobacteria; Myxococcales; Cystobacterineae; Archangiaceae; Archangium
NZ_CP069338.1	242	7798615	7799520	1	WP_203403531.1	JQX13_RS33460	GCF_016859125.1	VRR-NUC domain-containing protein	SP+VRR_NUC	Archangium violaceum	Bacteria; Proteobacteria; Deltaproteobacteria; Myxococcales; Cystobacterineae; Archangiaceae; Archangium
NZ_CP069338.1	242	7799649	7799825	0	WP_203403532.1	JQX13_RS33465	GCF_016859125.1	hypothetical protein		Archangium violaceum	Bacteria; Proteobacteria; Deltaproteobacteria; Myxococcales; Cystobacterineae; Archangiaceae; Archangium
NZ_CP069338.1	242	7800361	7800597	0	WP_203403533.1	JQX13_RS33470	GCF_016859125.1	hypothetical protein	SP	Archangium violaceum	Bacteria; Proteobacteria; Deltaproteobacteria; Myxococcales; Cystobacterineae; Archangiaceae; Archangium
NZ_CP069338.1	242	7800675	7801367	0	WP_203403534.1	JQX13_RS33475	GCF_016859125.1	hypothetical protein	SP	Archangium violaceum	Bacteria; Proteobacteria; Deltaproteobacteria; Myxococcales; Cystobacterineae; Archangiaceae; Archangium
NZ_JAAGPL010000041.1	243	31342	32262	0	WP_205793203.1	G3N94_RS14790	GCF_017104785.1	hypothetical protein	Bestrophin	Burkholderia sp. Ac-20353	Bacteria; Proteobacteria; Betaproteobacteria; Burkholderiales; Burkholderiaceae; Burkholderia
NZ_JAAGPL010000041.1	243	32370	32792	0	WP_205793205.1	G3N94_RS14795	GCF_017104785.1	hypothetical protein	SP	Burkholderia sp. Ac-20353	Bacteria; Proteobacteria; Betaproteobacteria; Burkholderiales; Burkholderiaceae; Burkholderia
NZ_JAAGPL010000041.1	243	33132	33326	0	WP_205793206.1	G3N94_RS14800	GCF_017104785.1	hypothetical protein		Burkholderia sp. Ac-20353	Bacteria; Proteobacteria; Betaproteobacteria; Burkholderiales; Burkholderiaceae; Burkholderia
NZ_JAAGPL010000041.1	243	33418	33912	1	WP_205793208.1	G3N94_RS14805	GCF_017104785.1	hypothetical protein	VRR_NUC	Burkholderia sp. Ac-20353	Bacteria; Proteobacteria; Betaproteobacteria; Burkholderiales; Burkholderiaceae; Burkholderia
NZ_JAAGPL010000041.1	243	33918	35003	0	WP_205793228.1	G3N94_RS14810	GCF_017104785.1	DUF3396 domain-containing protein	DUF3396	Burkholderia sp. Ac-20353	Bacteria; Proteobacteria; Betaproteobacteria; Burkholderiales; Burkholderiaceae; Burkholderia
NZ_JAAGPL010000041.1	243	35285	35569	0	WP_205793210.1	G3N94_RS14815	GCF_017104785.1	hypothetical protein		Burkholderia sp. Ac-20353	Bacteria; Proteobacteria; Betaproteobacteria; Burkholderiales; Burkholderiaceae; Burkholderia
NZ_JAAGPL010000041.1	243	36046	36777	0	WP_205793212.1	G3N94_RS14820	GCF_017104785.1	hypothetical protein		Burkholderia sp. Ac-20353	Bacteria; Proteobacteria; Betaproteobacteria; Burkholderiales; Burkholderiaceae; Burkholderia
NZ_JAFLRG010000001.1	244	1730241	1731698	0	WP_206951967.1	J3485_RS07990	GCF_017315725.1	SAM-dependent DNA methyltransferase	HsdM_N+N6_Mtase	Trinickia sp. 4D114	Bacteria; Proteobacteria; Betaproteobacteria; Burkholderiales; Burkholderiaceae; Trinickia; unclassified Trinickia
NZ_JAFLRG010000001.1	244	1731695	1733419	0	WP_206951968.1	J3485_RS07995	GCF_017315725.1	restriction endonuclease subunit S	Methylase_S+Methylase_S	Trinickia sp. 4D114	Bacteria; Proteobacteria; Betaproteobacteria; Burkholderiales; Burkholderiaceae; Trinickia; unclassified Trinickia
NZ_JAFLRG010000001.1	244	1733592	1734806	0	WP_206951969.1	J3485_RS08000	GCF_017315725.1	DUF3396 domain-containing protein	DUF3396	Trinickia sp. 4D114	Bacteria; Proteobacteria; Betaproteobacteria; Burkholderiales; Burkholderiaceae; Trinickia; unclassified Trinickia
NZ_JAFLRG010000001.1	244	1734817	1735566	1	WP_206951970.1	J3485_RS08005	GCF_017315725.1	VRR-NUC domain-containing protein	VRR_NUC	Trinickia sp. 4D114	Bacteria; Proteobacteria; Betaproteobacteria; Burkholderiales; Burkholderiaceae; Trinickia; unclassified Trinickia
NZ_JAFLRG010000001.1	244	1735563	1736090	0	WP_206951971.1	J3485_RS08010	GCF_017315725.1	PAAR domain-containing protein	PAAR_motif	Trinickia sp. 4D114	Bacteria; Proteobacteria; Betaproteobacteria; Burkholderiales; Burkholderiaceae; Trinickia; unclassified Trinickia
NZ_JAFLRG010000001.1	244	1736394	1737584	0	WP_206951972.1	J3485_RS08015	GCF_017315725.1	integrase arm-type DNA-binding domain-containing protein	Arm-DNA-bind_3+Phage_integrase	Trinickia sp. 4D114	Bacteria; Proteobacteria; Betaproteobacteria; Burkholderiales; Burkholderiaceae; Trinickia; unclassified Trinickia
NZ_JAFLRG010000001.1	244	1737998	1738876	0	WP_206955705.1	J3485_RS08020	GCF_017315725.1	hypothetical protein		Trinickia sp. 4D114	Bacteria; Proteobacteria; Betaproteobacteria; Burkholderiales; Burkholderiaceae; Trinickia; unclassified Trinickia
NZ_MLHJ01000148.1	245	85	906	1	WP_208606216.1	BKK50_RS11820	GCF_001998965.1	VRR-NUC domain-containing protein	VRR_NUC	Rodentibacter rarus	Bacteria; Proteobacteria; Gammaproteobacteria; Pasteurellales; Pasteurellaceae; Rodentibacter
NZ_MLHJ01000148.1	245	899	1849	0	WP_077418371.1	BKK50_RS11825	GCF_001998965.1	DUF3396 domain-containing protein	DUF3396	Rodentibacter rarus	Bacteria; Proteobacteria; Gammaproteobacteria; Pasteurellales; Pasteurellaceae; Rodentibacter
NZ_MLHJ01000148.1	245	1865	2752	0	WP_077418373.1	BKK50_RS11830	GCF_001998965.1	DUF4123 domain-containing protein	DUF4123	Rodentibacter rarus	Bacteria; Proteobacteria; Gammaproteobacteria; Pasteurellales; Pasteurellaceae; Rodentibacter
NZ_MLHJ01000148.1	245	2755	3269	0	WP_208606217.1	BKK50_RS12565	GCF_001998965.1	hypothetical protein		Rodentibacter rarus	Bacteria; Proteobacteria; Gammaproteobacteria; Pasteurellales; Pasteurellaceae; Rodentibacter
NZ_QZWI01000009.1	246	1799	2020	0	WP_120508420.1	D5398_RS15375	GCF_003614975.1	hypothetical protein		Rahnella bruchi	Bacteria; Proteobacteria; Gammaproteobacteria; Enterobacterales; Yersiniaceae; Rahnella
NZ_QZWI01000009.1	246	2031	3047	0	WP_120508421.1	D5398_RS15380	GCF_003614975.1	DUF2169 domain-containing protein	DUF2169	Rahnella bruchi	Bacteria; Proteobacteria; Gammaproteobacteria; Enterobacterales; Yersiniaceae; Rahnella
NZ_QZWI01000009.1	246	3044	4114	0	WP_120508422.1	D5398_RS15385	GCF_003614975.1	hypothetical protein	SP	Rahnella bruchi	Bacteria; Proteobacteria; Gammaproteobacteria; Enterobacterales; Yersiniaceae; Rahnella
NZ_QZWI01000009.1	246	4786	5163	1	WP_208645971.1	D5398_RS25530	GCF_003614975.1	hypothetical protein		Rahnella bruchi	Bacteria; Proteobacteria; Gammaproteobacteria; Enterobacterales; Yersiniaceae; Rahnella
NZ_QZWI01000009.1	246	5179	6165	0	WP_120508423.1	D5398_RS15395	GCF_003614975.1	DUF3396 domain-containing protein	DUF3396	Rahnella bruchi	Bacteria; Proteobacteria; Gammaproteobacteria; Enterobacterales; Yersiniaceae; Rahnella
NZ_QZWI01000009.1	246	6185	6583	0	WP_120508424.1	D5398_RS15400	GCF_003614975.1	DUF3274 domain-containing protein	DUF3274	Rahnella bruchi	Bacteria; Proteobacteria; Gammaproteobacteria; Enterobacterales; Yersiniaceae; Rahnella
NZ_QZWI01000009.1	246	6595	7314	0	WP_120508425.1	D5398_RS15405	GCF_003614975.1	hypothetical protein	SP	Rahnella bruchi	Bacteria; Proteobacteria; Gammaproteobacteria; Enterobacterales; Yersiniaceae; Rahnella
NZ_JAFLRG010000002.1	247	2304571	2304834	0	WP_206958109.1	J3485_RS28525	GCF_017315725.1	hypothetical protein	DUF2345	Trinickia sp. 4D114	Bacteria; Proteobacteria; Betaproteobacteria; Burkholderiales; Burkholderiaceae; Trinickia; unclassified Trinickia
NZ_JAFLRG010000002.1	247	2304838	2305908	0	WP_206958111.1	J3485_RS28530	GCF_017315725.1	DUF2169 domain-containing protein	DUF2169	Trinickia sp. 4D114	Bacteria; Proteobacteria; Betaproteobacteria; Burkholderiales; Burkholderiaceae; Trinickia; unclassified Trinickia
NZ_JAFLRG010000002.1	247	2305905	2306999	0	WP_206958113.1	J3485_RS28535	GCF_017315725.1	beta-ketoacyl synthase	SP+ketoacyl-synt	Trinickia sp. 4D114	Bacteria; Proteobacteria; Betaproteobacteria; Burkholderiales; Burkholderiaceae; Trinickia; unclassified Trinickia
NZ_JAFLRG010000002.1	247	2306996	2308042	1	WP_206958114.1	J3485_RS28540	GCF_017315725.1	DUF4150 domain-containing protein	DUF4150	Trinickia sp. 4D114	Bacteria; Proteobacteria; Betaproteobacteria; Burkholderiales; Burkholderiaceae; Trinickia; unclassified Trinickia
NZ_JAFLRG010000002.1	247	2308520	2309065	0	WP_206958483.1	J3485_RS28545	GCF_017315725.1	DUF3396 domain-containing protein	DUF3396	Trinickia sp. 4D114	Bacteria; Proteobacteria; Betaproteobacteria; Burkholderiales; Burkholderiaceae; Trinickia; unclassified Trinickia
[truncated: 74 more rows]

## Sheet: Aave_0499
Supplementary file 3B. Genomic context of each Aave_0499 homolog.
nucleotide	block_id	start	end	PDDExK	proteinID	locus	assembly	product	pfam	organism	classification
[truncated: 443 more rows]

## Sheet: IdrD
Supplementary file 3C. Genomic context of each IdrD homolog.
[truncated: 505 more rows]

[truncated: 7 more sheets: PoNe, PmgM, T1p21, KIAA1018, Bce1019, HP1472, TseT]
